# Supplementary material for: Controllable catalytic difluorocarbene transfer enables access to diversified fluoroalkylated arenes
Source: Springer Nature journal article supplement (doi:10.1038/s41557-019-0331-9), 2019-09-23
Supplement: 41557_2019_331_MOESM15_ESM.mol [file 41557_2019_331_MOESM15_ESM.mol]

nchem.19030518B-comp7.mol
  ChemDraw07301917512D

 20 21  0  0  0  0  0  0  0  0999 V2000
    0.0000    0.4131    0.0000 C   0  0  0  0  0  0  0  0  0  0  0  0
   -0.7150    0.0003    0.0000 C   0  0  0  0  0  0  0  0  0  0  0  0
   -0.7150   -0.8253    0.0000 C   0  0  0  0  0  0  0  0  0  0  0  0
    0.0000   -1.2381    0.0000 C   0  0  0  0  0  0  0  0  0  0  0  0
    0.7150   -0.8253    0.0000 C   0  0  0  0  0  0  0  0  0  0  0  0
    0.7150    0.0003    0.0000 C   0  0  0  0  0  0  0  0  0  0  0  0
    1.4276    0.4118    0.0000 C   0  0  0  0  0  0  0  0  0  0  0  0
    2.1421   -0.0007    0.0000 O   0  0  0  0  0  0  0  0  0  0  0  0
    1.4276    1.2368    0.0000 C   0  0  0  0  0  0  0  0  0  0  0  0
    1.0151    1.9512    0.0000 F   0  0  0  0  0  0  0  0  0  0  0  0
    0.6026    1.2368    0.0000 F   0  0  0  0  0  0  0  0  0  0  0  0
    2.1421    1.6493    0.0000 C   0  0  0  0  0  0  0  0  0  0  0  0
    2.1421    2.4743    0.0000 F   0  0  0  0  0  0  0  0  0  0  0  0
    2.8566    1.2368    0.0000 F   0  0  0  0  0  0  0  0  0  0  0  0
   -1.4276   -1.2367    0.0000 C   0  0  0  0  0  0  0  0  0  0  0  0
   -2.1421   -0.8243    0.0000 C   0  0  0  0  0  0  0  0  0  0  0  0
   -2.8566   -1.2368    0.0000 C   0  0  0  0  0  0  0  0  0  0  0  0
   -2.8566   -2.0618    0.0000 C   0  0  0  0  0  0  0  0  0  0  0  0
   -2.1421   -2.4743    0.0000 C   0  0  0  0  0  0  0  0  0  0  0  0
   -1.4276   -2.0617    0.0000 C   0  0  0  0  0  0  0  0  0  0  0  0
 12 13  1  0      
 12 14  1  0      
  9 10  1  0      
  9 11  1  0      
  9 12  1  0      
  7  8  2  0      
  7  9  1  0      
  6  7  1  0      
 19 20  2  0      
 18 19  1  0      
 17 18  2  0      
 16 17  1  0      
 15 16  2  0      
 15 20  1  0      
  3 15  1  0      
  1  2  2  0      
  2  3  1  0      
  3  4  2  0      
  4  5  1  0      
  5  6  2  0      
  6  1  1  0      
M  STY  1   1 SUP
M  SLB  1   1   1
M  SAL   1  8   7   8   9  10  11  12  13  14
M  SBL   1  1   8
M  SMT   1 COCF2CF2H
M  SBV   1   8   -0.7126   -0.4114
M  STY  1   2 SUP
M  SLB  1   2   2
M  SAL   2  6  15  16  17  18  19  20
M  SBL   2  1  15
M  SMT   2 Ph
M  SBV   2  15    0.7126    0.4114
M  END
