# Supplementary material for: Controllable catalytic difluorocarbene transfer enables access to diversified fluoroalkylated arenes
Source: Springer Nature journal article supplement (doi:10.1038/s41557-019-0331-9), 2019-09-23
Supplement: 41557_2019_331_MOESM128_ESM.mol [file 41557_2019_331_MOESM128_ESM.mol]

nchem.19030518B-compA1-2.mol
  ChemDraw07301920142D

 46 49  0  0  0  0  0  0  0  0999 V2000
   -0.7145    1.3298    0.0000 C   0  0  0  0  0  0  0  0  0  0  0  0
   -0.7145    0.5048    0.0000 C   0  0  0  0  0  0  0  0  0  0  0  0
    0.0000    0.0923    0.0000 O   0  0  0  0  0  0  0  0  0  0  0  0
    0.7145    0.5048    0.0000 C   0  0  0  0  0  0  0  0  0  0  0  0
    0.7145    1.3298    0.0000 C   0  0  0  0  0  0  0  0  0  0  0  0
    0.0000    1.7423    0.0000 C   0  0  0  0  0  0  0  0  0  0  0  0
    1.4289    0.0923    0.0000 C   0  0  0  0  0  0  0  0  0  0  0  0
    2.1434    0.5048    0.0000 C   0  0  0  0  0  0  0  0  0  0  0  0
    2.1434    1.3298    0.0000 C   0  0  0  0  0  0  0  0  0  0  0  0
    1.4289    1.7423    0.0000 C   0  0  0  0  0  0  0  0  0  0  0  0
   -1.4289    1.7423    0.0000 C   0  0  0  0  0  0  0  0  0  0  0  0
   -2.1434    1.3298    0.0000 C   0  0  0  0  0  0  0  0  0  0  0  0
   -2.1434    0.5048    0.0000 C   0  0  0  0  0  0  0  0  0  0  0  0
   -1.4289    0.0923    0.0000 C   0  0  0  0  0  0  0  0  0  0  0  0
    0.4125    2.4568    0.0000 C   0  0  0  0  0  0  0  0  0  0  0  0
   -0.4125    2.4568    0.0000 C   0  0  0  0  0  0  0  0  0  0  0  0
   -1.4289   -0.7327    0.0000 P   0  0  0  0  0  0  0  0  0  0  0  0
    1.4289   -0.7327    0.0000 P   0  0  0  0  0  0  0  0  0  0  0  0
   -0.0039   -1.2190    0.0000 Pd  0  0  0  0  0  0  0  0  0  0  0  0
   -2.2485   -0.8276    0.0000 C   0  0  0  0  0  0  0  0  0  0  0  0
   -2.1536   -1.6465    0.0000 C   0  0  0  0  0  0  0  0  0  0  0  0
   -3.0673   -0.9225    0.0000 C   0  0  0  0  0  0  0  0  0  0  0  0
   -2.3433   -0.0087    0.0000 C   0  0  0  0  0  0  0  0  0  0  0  0
   -1.7565   -1.4899    0.0000 C   0  0  0  0  0  0  0  0  0  0  0  0
   -0.9999   -1.8171    0.0000 C   0  0  0  0  0  0  0  0  0  0  0  0
   -2.0837   -2.2465    0.0000 C   0  0  0  0  0  0  0  0  0  0  0  0
   -2.5131   -1.1626    0.0000 C   0  0  0  0  0  0  0  0  0  0  0  0
    1.7862   -1.4763    0.0000 C   0  0  0  0  0  0  0  0  0  0  0  0
    2.5293   -1.1193    0.0000 C   0  0  0  0  0  0  0  0  0  0  0  0
    2.1432   -2.2193    0.0000 C   0  0  0  0  0  0  0  0  0  0  0  0
    1.0432   -1.8333    0.0000 C   0  0  0  0  0  0  0  0  0  0  0  0
    2.2516   -0.7951    0.0000 C   0  0  0  0  0  0  0  0  0  0  0  0
    2.3139    0.0269    0.0000 C   0  0  0  0  0  0  0  0  0  0  0  0
    3.0736   -0.8574    0.0000 C   0  0  0  0  0  0  0  0  0  0  0  0
    2.1892   -1.6171    0.0000 C   0  0  0  0  0  0  0  0  0  0  0  0
   -0.0046   -2.0440    0.0000 C   0  0  0  0  0  0  0  0  0  0  0  0
   -0.7188   -2.4556    0.0000 F   0  0  0  0  0  0  0  0  0  0  0  0
    0.7090   -2.4568    0.0000 F   0  0  0  0  0  0  0  0  0  0  0  0
   -2.8579    1.7423    0.0000 C   0  0  0  0  0  0  0  0  0  0  0  0
   -3.2701    1.0284    0.0000 C   0  0  0  0  0  0  0  0  0  0  0  0
   -3.5718    2.1545    0.0000 C   0  0  0  0  0  0  0  0  0  0  0  0
   -2.4457    2.4563    0.0000 C   0  0  0  0  0  0  0  0  0  0  0  0
    2.8579    1.7423    0.0000 C   0  0  0  0  0  0  0  0  0  0  0  0
    2.4457    2.4563    0.0000 C   0  0  0  0  0  0  0  0  0  0  0  0
    3.5718    2.1545    0.0000 C   0  0  0  0  0  0  0  0  0  0  0  0
    3.2701    1.0284    0.0000 C   0  0  0  0  0  0  0  0  0  0  0  0
 20 21  1  0      
 20 22  1  0      
 20 23  1  0      
 17 20  1  0      
 24 25  1  0      
 24 26  1  0      
 24 27  1  0      
 17 24  1  0      
 28 29  1  0      
 28 30  1  0      
 28 31  1  0      
 18 28  1  0      
 32 33  1  0      
 32 34  1  0      
 32 35  1  0      
 18 32  1  0      
 36 37  1  0      
 36 38  1  0      
 19 36  2  0      
 39 40  1  0      
 39 41  1  0      
 39 42  1  0      
 12 39  1  0      
 43 44  1  0      
 43 45  1  0      
 43 46  1  0      
  9 43  1  0      
  1  2  2  0      
  2  3  1  0      
  3  4  1  0      
  4  5  2  0      
  5  6  1  0      
  6  1  1  0      
  4  7  1  0      
  7  8  2  0      
  8  9  1  0      
  9 10  2  0      
 10  5  1  0      
  1 11  1  0      
 11 12  2  0      
 12 13  1  0      
 13 14  2  0      
 14  2  1  0      
  6 15  1  0      
 16  6  1  0      
 14 17  1  0      
  7 18  1  0      
 17 19  1  0      
 19 18  1  0      
M  STY  1   1 SUP
M  SLB  1   1   1
M  SAL   1  4  20  21  22  23
M  SBL   1  1   4
M  SMT   1 t-Bu
M  SBV   1   4    0.8195    0.0950
M  STY  1   2 SUP
M  SLB  1   2   2
M  SAL   2  4  24  25  26  27
M  SBL   2  1   8
M  SMT   2 t-Bu
M  SBV   2   8    0.3275    0.7572
M  STY  1   3 SUP
M  SLB  1   3   3
M  SAL   3  4  28  29  30  31
M  SBL   3  1  12
M  SMT   3 t-Bu
M  SBV   3  12   -0.3573    0.7436
M  STY  1   4 SUP
M  SLB  1   4   4
M  SAL   4  4  32  33  34  35
M  SBL   4  1  16
M  SMT   4 t-Bu
M  SBV   4  16   -0.8226    0.0624
M  STY  1   5 SUP
M  SLB  1   5   5
M  SAL   5  3  36  37  38
M  SBL   5  1  19
M  SMT   5 CF2
M  SBV   5  19    0.0007    0.8250
M  STY  1   6 SUP
M  SLB  1   6   6
M  SAL   6  4  39  40  41  42
M  SBL   6  1  23
M  SMT   6 t-Bu
M  SBV   6  23    0.7145   -0.4125
M  STY  1   7 SUP
M  SLB  1   7   7
M  SAL   7  4  43  44  45  46
M  SBL   7  1  27
M  SMT   7 t-Bu
M  SBV   7  27   -0.7145   -0.4125
M  END
