# Supplementary material for: Controllable catalytic difluorocarbene transfer enables access to diversified fluoroalkylated arenes
Source: Springer Nature journal article supplement (doi:10.1038/s41557-019-0331-9), 2019-09-23
Supplement: 41557_2019_331_MOESM130_ESM.cif [file 41557_2019_331_MOESM130_ESM.cif]

 
data_mo_d8v181060_0m 
  
_audit_creation_method            SHELXL-2013 
_chemical_name_systematic 
; 
 ? 
; 
_chemical_name_common             ? 
_chemical_melting_point           ? 
_chemical_formula_moiety          ? 
_chemical_formula_sum 
 'C34 H48 F6 O3 P2 Pd' 
_chemical_formula_weight          787.06 
  
loop_ 
 _atom_type_symbol 
 _atom_type_description 
 _atom_type_scat_dispersion_real 
 _atom_type_scat_dispersion_imag 
 _atom_type_scat_source 
 'C'  'C'   0.0033   0.0016 
 'International Tables Vol C Tables 4.2.6.8 and 6.1.1.4' 
 'H'  'H'   0.0000   0.0000 
 'International Tables Vol C Tables 4.2.6.8 and 6.1.1.4' 
 'F'  'F'   0.0171   0.0103 
 'International Tables Vol C Tables 4.2.6.8 and 6.1.1.4' 
 'O'  'O'   0.0106   0.0060 
 'International Tables Vol C Tables 4.2.6.8 and 6.1.1.4' 
 'P'  'P'   0.1023   0.0942 
 'International Tables Vol C Tables 4.2.6.8 and 6.1.1.4' 
 'Pd'  'Pd'  -0.9988   1.0072 
 'International Tables Vol C Tables 4.2.6.8 and 6.1.1.4' 
  
_space_group_crystal_system       monoclinic 
_space_group_IT_number            14 
_space_group_name_H-M_alt         'P 21/c' 
_space_group_name_Hall            '-P 2ybc' 
  
_shelx_space_group_comment 
; 
The symmetry employed for this shelxl refinement is uniquely defined 
by the following loop, which should always be used as a source of 
symmetry information in preference to the above space-group names. 
They are only intended as comments. 
; 
  
loop_ 
 _space_group_symop_operation_xyz 
 'x, y, z' 
 '-x, y+1/2, -z+1/2' 
 '-x, -y, -z' 
 'x, -y-1/2, z-1/2' 
  
_cell_length_a                    12.8967(3) 
_cell_length_b                    21.8600(5) 
_cell_length_c                    13.3517(3) 
_cell_angle_alpha                 90 
_cell_angle_beta                  110.4240(10) 
_cell_angle_gamma                 90 
_cell_volume                      3527.51(14) 
_cell_formula_units_Z             4 
_cell_measurement_temperature     193(2) 
_cell_measurement_reflns_used     9984 
_cell_measurement_theta_min       5.310 
_cell_measurement_theta_max       54.995 
  
_exptl_crystal_description        prismatic 
_exptl_crystal_colour             yellow 
_exptl_crystal_density_meas       ? 
_exptl_crystal_density_method     ? 
_exptl_crystal_density_diffrn     1.482 
_exptl_crystal_F_000              1624 
_exptl_transmission_factor_min    ? 
_exptl_transmission_factor_max    ? 
_exptl_crystal_size_max           0.140 
_exptl_crystal_size_mid           0.120 
_exptl_crystal_size_min           0.070 
_exptl_absorpt_coefficient_mu     0.681 
_shelx_estimated_absorpt_T_min    0.911 
_shelx_estimated_absorpt_T_max    0.954 
_exptl_absorpt_correction_type    multi-scan 
_exptl_absorpt_correction_T_min   0.6658 
_exptl_absorpt_correction_T_max   0.7456 
_exptl_absorpt_process_details    sadabs 
  
_exptl_special_details 
; 
 ? 
; 
  
_diffrn_ambient_temperature       193(2) 
_diffrn_radiation_wavelength      0.71073 
_diffrn_radiation_type            MoK\a 
_diffrn_source                    ? 
_diffrn_measurement_device_type   'Bruker APEX-II CCD' 
_diffrn_measurement_method        '\f and \w scans' 
_diffrn_detector_area_resol_mean  ? 
_diffrn_reflns_number             35634 
_diffrn_reflns_av_unetI/netI      0.0223 
_diffrn_reflns_av_R_equivalents   0.0287 
_diffrn_reflns_limit_h_min        -15 
_diffrn_reflns_limit_h_max        15 
_diffrn_reflns_limit_k_min        -26 
_diffrn_reflns_limit_k_max        26 
_diffrn_reflns_limit_l_min        -15 
_diffrn_reflns_limit_l_max        16 
_diffrn_reflns_theta_min          2.474 
_diffrn_reflns_theta_max          26.000 
_diffrn_reflns_theta_full         25.242 
_diffrn_measured_fraction_theta_max   0.996 
_diffrn_measured_fraction_theta_full  0.996 
_diffrn_reflns_Laue_measured_fraction_max    0.996 
_diffrn_reflns_Laue_measured_fraction_full   0.996 
_diffrn_reflns_point_group_measured_fraction_max   0.996 
_diffrn_reflns_point_group_measured_fraction_full  0.996 
_reflns_number_total              6916 
_reflns_number_gt                 6358 
_reflns_threshold_expression      'I > 2\s(I)' 
_reflns_Friedel_coverage          0.000 
_reflns_Friedel_fraction_max      . 
_reflns_Friedel_fraction_full     . 
  
_reflns_special_details 
; 
 Reflections were merged by SHELXL according to the crystal 
 class for the calculation of statistics and refinement. 
  
 _reflns_Friedel_fraction is defined as the number of unique 
 Friedel pairs measured divided by the number that would be 
 possible theoretically, ignoring centric projections and 
 systematic absences. 
; 
  
_computing_data_collection        'Bruker APEX2' 
_computing_cell_refinement        'Bruker SAINT' 
_computing_data_reduction         'Bruker SAINT' 
_computing_structure_solution     'SHELXS-97 (Sheldrick 2008)' 
_computing_structure_refinement   'SHELXL-2013 (Sheldrick, 2013)' 
_computing_molecular_graphics     'Bruker SHELXTL' 
_computing_publication_material   'Bruker SHELXTL' 
  
_refine_special_details 
; 
 ? 
; 
_refine_ls_structure_factor_coef  Fsqd 
_refine_ls_matrix_type            full 
_refine_ls_weighting_scheme       calc 
_refine_ls_weighting_details 
'w=1/[\s^2^(Fo^2^)+(0.0328P)^2^+3.0122P] where P=(Fo^2^+2Fc^2^)/3' 
_atom_sites_solution_primary      ? 
_atom_sites_solution_secondary    ? 
_atom_sites_solution_hydrogens    geom 
_refine_ls_hydrogen_treatment     constr 
_refine_ls_extinction_method      SHELXL 
_refine_ls_extinction_coef        ? 
_refine_ls_extinction_expression 
 'Fc^*^=kFc[1+0.001xFc^2^\l^3^/sin(2\q)]^-1/4^' 
_refine_ls_number_reflns          6916 
_refine_ls_number_parameters      430 
_refine_ls_number_restraints      0 
_refine_ls_R_factor_all           0.0293 
_refine_ls_R_factor_gt            0.0257 
_refine_ls_wR_factor_ref          0.0683 
_refine_ls_wR_factor_gt           0.0652 
_refine_ls_goodness_of_fit_ref    1.001 
_refine_ls_restrained_S_all       1.001 
_refine_ls_shift/su_max           0.004 
_refine_ls_shift/su_mean          0.000 
  
loop_ 
 _atom_site_label 
 _atom_site_type_symbol 
 _atom_site_fract_x 
 _atom_site_fract_y 
 _atom_site_fract_z 
 _atom_site_U_iso_or_equiv 
 _atom_site_adp_type 
 _atom_site_occupancy 
 _atom_site_site_symmetry_order 
 _atom_site_calc_flag 
 _atom_site_refinement_flags_posn 
 _atom_site_refinement_flags_adp 
 _atom_site_refinement_flags_occupancy 
 _atom_site_disorder_assembly 
 _atom_site_disorder_group 
Pd1 Pd 0.53741(2) 0.67685(2) 0.48226(2) 0.01833(7) Uani 1 1 d . . . . . 
P1 P 0.34362(4) 0.67562(2) 0.43703(4) 0.01866(11) Uani 1 1 d . . . . . 
P2 P 0.73162(4) 0.66920(2) 0.56505(4) 0.02016(11) Uani 1 1 d . . . . . 
F1 F 0.45097(11) 0.75052(6) 0.29541(11) 0.0412(3) Uani 1 1 d . . . . . 
F2 F 0.62633(11) 0.75233(6) 0.35939(11) 0.0397(3) Uani 1 1 d . . . . . 
F3 F 0.54261(12) 0.67283(6) 0.27491(10) 0.0406(3) Uani 1 1 d . . . . . 
O1 O 0.53611(10) 0.63232(6) 0.62581(10) 0.0208(3) Uani 1 1 d . . . . . 
C1 C 0.43471(15) 0.61896(8) 0.63968(15) 0.0194(4) Uani 1 1 d . . . . . 
C2 C 0.33892(15) 0.63904(8) 0.55845(15) 0.0210(4) Uani 1 1 d . . . . . 
C3 C 0.23746(16) 0.62605(9) 0.57071(16) 0.0255(4) Uani 1 1 d . . . . . 
H3 H 0.1707 0.6386 0.5167 0.031 Uiso 1 1 calc R U . . . 
C4 C 0.23225(17) 0.59561(10) 0.65919(17) 0.0291(4) Uani 1 1 d . . . . . 
H4 H 0.1627 0.5877 0.6663 0.035 Uiso 1 1 calc R U . . . 
C5 C 0.32836(17) 0.57677(10) 0.73702(17) 0.0279(4) Uani 1 1 d . . . . . 
H5 H 0.3243 0.5560 0.7980 0.034 Uiso 1 1 calc R U . . . 
C6 C 0.43186(16) 0.58732(9) 0.72882(15) 0.0215(4) Uani 1 1 d . . . . . 
C7 C 0.53340(16) 0.56263(9) 0.81616(15) 0.0223(4) Uani 1 1 d . . . . . 
C8 C 0.63677(16) 0.57858(9) 0.79200(15) 0.0222(4) Uani 1 1 d . . . . . 
C9 C 0.73925(17) 0.55929(10) 0.86340(16) 0.0286(4) Uani 1 1 d . . . . . 
H9 H 0.7418 0.5359 0.9241 0.034 Uiso 1 1 calc R U . . . 
C10 C 0.83633(17) 0.57336(11) 0.84797(17) 0.0335(5) Uani 1 1 d . . . . . 
H10 H 0.9050 0.5600 0.8979 0.040 Uiso 1 1 calc R U . . . 
C11 C 0.83375(17) 0.60705(11) 0.75964(17) 0.0315(5) Uani 1 1 d . . . . . 
H11 H 0.9013 0.6170 0.7499 0.038 Uiso 1 1 calc R U . . . 
C12 C 0.73379(16) 0.62694(10) 0.68412(15) 0.0243(4) Uani 1 1 d . . . . . 
C13 C 0.63667(15) 0.61189(9) 0.70340(14) 0.0206(4) Uani 1 1 d . . . . . 
C14 C 0.54218(18) 0.59113(11) 0.92420(16) 0.0340(5) Uani 1 1 d . . . . . 
H14A H 0.5506 0.6356 0.9210 0.051 Uiso 1 1 calc R U . . . 
H14B H 0.6066 0.5741 0.9807 0.051 Uiso 1 1 calc R U . . . 
H14C H 0.4750 0.5819 0.9397 0.051 Uiso 1 1 calc R U . . . 
C15 C 0.52245(19) 0.49256(10) 0.8228(2) 0.0347(5) Uani 1 1 d . . . . . 
H15A H 0.4573 0.4829 0.8415 0.052 Uiso 1 1 calc R U . . . 
H15B H 0.5888 0.4761 0.8776 0.052 Uiso 1 1 calc R U . . . 
H15C H 0.5143 0.4742 0.7535 0.052 Uiso 1 1 calc R U . . . 
C16 C 0.27193(18) 0.61867(10) 0.32942(17) 0.0319(5) Uani 1 1 d . . . . . 
C17 C 0.3368(3) 0.55909(11) 0.3671(2) 0.0526(7) Uani 1 1 d . . . . . 
H17A H 0.4145 0.5655 0.3750 0.079 Uiso 1 1 calc R U . . . 
H17B H 0.3053 0.5268 0.3144 0.079 Uiso 1 1 calc R U . . . 
H17C H 0.3322 0.5469 0.4361 0.079 Uiso 1 1 calc R U . . . 
C18 C 0.1504(2) 0.60780(18) 0.3127(3) 0.0689(10) Uani 1 1 d . . . . . 
H18A H 0.1436 0.5926 0.3792 0.103 Uiso 1 1 calc R U . . . 
H18B H 0.1199 0.5775 0.2560 0.103 Uiso 1 1 calc R U . . . 
H18C H 0.1095 0.6463 0.2923 0.103 Uiso 1 1 calc R U . . . 
C19 C 0.2825(2) 0.63675(12) 0.22242(18) 0.0410(6) Uani 1 1 d . . . . . 
H19A H 0.2445 0.6758 0.1984 0.061 Uiso 1 1 calc R U . . . 
H19B H 0.2487 0.6050 0.1691 0.061 Uiso 1 1 calc R U . . . 
H19C H 0.3609 0.6410 0.2314 0.061 Uiso 1 1 calc R U . . . 
C20 C 0.27159(17) 0.75198(9) 0.42701(16) 0.0263(4) Uani 1 1 d . . . . . 
C21 C 0.17459(18) 0.75330(10) 0.46889(19) 0.0342(5) Uani 1 1 d . . . . . 
H21A H 0.1172 0.7246 0.4276 0.051 Uiso 1 1 calc R U . . . 
H21B H 0.1437 0.7947 0.4614 0.051 Uiso 1 1 calc R U . . . 
H21C H 0.2011 0.7414 0.5444 0.051 Uiso 1 1 calc R U . . . 
C22 C 0.2258(2) 0.77517(12) 0.31120(19) 0.0440(6) Uani 1 1 d . . . . . 
H22A H 0.2861 0.7778 0.2826 0.066 Uiso 1 1 calc R U . . . 
H22B H 0.1930 0.8158 0.3095 0.066 Uiso 1 1 calc R U . . . 
H22C H 0.1692 0.7468 0.2677 0.066 Uiso 1 1 calc R U . . . 
C23 C 0.36079(19) 0.79528(10) 0.4973(2) 0.0376(5) Uani 1 1 d . . . . . 
H23A H 0.3903 0.7790 0.5702 0.056 Uiso 1 1 calc R U . . . 
H23B H 0.3284 0.8357 0.4982 0.056 Uiso 1 1 calc R U . . . 
H23C H 0.4207 0.7987 0.4684 0.056 Uiso 1 1 calc R U . . . 
C24 C 0.80141(17) 0.74496(10) 0.61639(17) 0.0300(5) Uani 1 1 d . . . . . 
C25 C 0.7096(2) 0.78458(11) 0.63126(19) 0.0388(5) Uani 1 1 d . . . . . 
H25A H 0.6498 0.7898 0.5623 0.058 Uiso 1 1 calc R U . . . 
H25B H 0.7398 0.8247 0.6594 0.058 Uiso 1 1 calc R U . . . 
H25C H 0.6806 0.7645 0.6817 0.058 Uiso 1 1 calc R U . . . 
C26 C 0.8472(2) 0.77656(12) 0.5381(2) 0.0481(7) Uani 1 1 d . . . . . 
H26A H 0.9088 0.7525 0.5318 0.072 Uiso 1 1 calc R U . . . 
H26B H 0.8735 0.8176 0.5646 0.072 Uiso 1 1 calc R U . . . 
H26C H 0.7887 0.7798 0.4679 0.072 Uiso 1 1 calc R U . . . 
C27 C 0.89585(19) 0.74013(12) 0.72503(19) 0.0429(6) Uani 1 1 d . . . . . 
H27A H 0.8669 0.7237 0.7784 0.064 Uiso 1 1 calc R U . . . 
H27B H 0.9274 0.7808 0.7474 0.064 Uiso 1 1 calc R U . . . 
H27C H 0.9534 0.7128 0.7185 0.064 Uiso 1 1 calc R U . . . 
C28 C 0.80940(18) 0.61945(10) 0.49976(17) 0.0310(5) Uani 1 1 d . . . . . 
C29 C 0.8000(2) 0.64472(12) 0.39099(19) 0.0448(6) Uani 1 1 d . . . . . 
H29A H 0.7222 0.6447 0.3440 0.067 Uiso 1 1 calc R U . . . 
H29B H 0.8432 0.6191 0.3596 0.067 Uiso 1 1 calc R U . . . 
H29C H 0.8286 0.6867 0.3991 0.067 Uiso 1 1 calc R U . . . 
C30 C 0.9337(3) 0.6137(2) 0.5627(2) 0.0799(12) Uani 1 1 d . . . . . 
H30A H 0.9664 0.6546 0.5793 0.120 Uiso 1 1 calc R U . . . 
H30B H 0.9693 0.5914 0.5197 0.120 Uiso 1 1 calc R U . . . 
H30C H 0.9450 0.5913 0.6293 0.120 Uiso 1 1 calc R U . . . 
C31 C 0.7552(4) 0.55774(14) 0.4858(3) 0.0928(15) Uani 1 1 d . . . . . 
H31A H 0.7680 0.5394 0.5561 0.139 Uiso 1 1 calc R U . . . 
H31B H 0.7867 0.5313 0.4445 0.139 Uiso 1 1 calc R U . . . 
H31C H 0.6755 0.5622 0.4477 0.139 Uiso 1 1 calc R U . . . 
C32 C 0.53883(17) 0.71520(10) 0.34818(16) 0.0274(4) Uani 1 1 d . . . . . 
F4 F 0.06026(17) 0.48769(9) 0.73094(13) 0.0756(6) Uani 1 1 d . . . . . 
F5 F 0.20982(19) 0.45197(9) 0.83978(19) 0.0933(7) Uani 1 1 d . . . . . 
F6 F 0.06734(17) 0.45666(9) 0.88471(14) 0.0812(7) Uani 1 1 d . . . . . 
O2 O 0.09356(14) 0.59258(8) 0.83856(17) 0.0524(5) Uani 1 1 d . . . . . 
O3 O 0.24554(16) 0.55111(8) 0.95807(14) 0.0532(5) Uani 1 1 d . . . . . 
C33 C 0.15741(18) 0.55117(10) 0.88295(17) 0.0307(5) Uani 1 1 d . . . . . 
C34 C 0.1230(2) 0.48730(12) 0.83351(19) 0.0436(6) Uani 1 1 d . . . . . 
  
loop_ 
 _atom_site_aniso_label 
 _atom_site_aniso_U_11 
 _atom_site_aniso_U_22 
 _atom_site_aniso_U_33 
 _atom_site_aniso_U_23 
 _atom_site_aniso_U_13 
 _atom_site_aniso_U_12 
Pd1 0.01580(9) 0.02149(9) 0.01742(9) 0.00385(5) 0.00546(6) 0.00043(5) 
P1 0.0159(2) 0.0206(2) 0.0180(2) 0.00182(17) 0.00406(18) 0.00033(18) 
P2 0.0159(2) 0.0265(3) 0.0182(2) 0.00337(18) 0.00602(18) -0.00029(18) 
F1 0.0375(7) 0.0499(8) 0.0371(7) 0.0234(6) 0.0143(6) 0.0152(6) 
F2 0.0387(7) 0.0450(8) 0.0389(7) 0.0117(6) 0.0177(6) -0.0080(6) 
F3 0.0514(9) 0.0491(8) 0.0243(7) 0.0000(5) 0.0170(6) 0.0045(6) 
O1 0.0138(6) 0.0271(7) 0.0207(7) 0.0073(5) 0.0050(5) 0.0015(5) 
C1 0.0166(9) 0.0201(9) 0.0230(9) 0.0006(7) 0.0088(7) -0.0004(7) 
C2 0.0197(9) 0.0218(9) 0.0220(9) 0.0022(7) 0.0078(7) 0.0002(7) 
C3 0.0176(9) 0.0289(10) 0.0290(11) 0.0046(8) 0.0067(8) 0.0012(8) 
C4 0.0218(10) 0.0333(11) 0.0363(12) 0.0041(9) 0.0153(9) -0.0006(8) 
C5 0.0271(11) 0.0313(11) 0.0287(11) 0.0079(8) 0.0138(9) 0.0013(9) 
C6 0.0222(10) 0.0217(9) 0.0219(10) 0.0024(7) 0.0093(8) 0.0014(8) 
C7 0.0224(10) 0.0248(10) 0.0207(9) 0.0058(7) 0.0090(8) 0.0027(8) 
C8 0.0224(10) 0.0250(10) 0.0196(9) 0.0016(7) 0.0080(8) 0.0021(8) 
C9 0.0282(11) 0.0369(11) 0.0193(10) 0.0090(8) 0.0064(8) 0.0059(9) 
C10 0.0212(10) 0.0501(14) 0.0253(11) 0.0105(9) 0.0033(8) 0.0087(9) 
C11 0.0191(10) 0.0486(13) 0.0259(11) 0.0090(9) 0.0068(8) 0.0034(9) 
C12 0.0194(9) 0.0335(11) 0.0196(9) 0.0060(8) 0.0062(7) 0.0008(8) 
C13 0.0174(9) 0.0236(9) 0.0181(9) 0.0027(7) 0.0029(7) 0.0039(7) 
C14 0.0327(12) 0.0499(14) 0.0225(11) 0.0007(9) 0.0133(9) 0.0049(10) 
C15 0.0314(12) 0.0277(11) 0.0459(13) 0.0110(9) 0.0146(10) 0.0027(9) 
C16 0.0324(11) 0.0365(12) 0.0274(11) -0.0106(9) 0.0112(9) -0.0126(9) 
C17 0.093(2) 0.0259(12) 0.0449(15) -0.0081(10) 0.0310(15) -0.0067(13) 
C18 0.0393(15) 0.108(3) 0.0599(19) -0.0441(18) 0.0184(14) -0.0384(17) 
C19 0.0489(15) 0.0453(14) 0.0246(11) -0.0053(10) 0.0077(10) -0.0056(11) 
C20 0.0265(10) 0.0246(10) 0.0287(11) 0.0069(8) 0.0108(8) 0.0078(8) 
C21 0.0318(12) 0.0329(11) 0.0421(13) 0.0067(9) 0.0183(10) 0.0102(9) 
C22 0.0452(14) 0.0494(15) 0.0396(14) 0.0217(11) 0.0174(11) 0.0256(12) 
C23 0.0374(13) 0.0252(11) 0.0522(14) -0.0063(10) 0.0182(11) -0.0015(9) 
C24 0.0281(11) 0.0341(11) 0.0267(11) -0.0042(8) 0.0083(9) -0.0096(9) 
C25 0.0423(13) 0.0344(12) 0.0357(13) -0.0103(10) 0.0086(10) -0.0005(10) 
C26 0.0587(17) 0.0457(15) 0.0447(15) -0.0062(11) 0.0242(13) -0.0279(13) 
C27 0.0293(12) 0.0543(15) 0.0373(13) -0.0093(11) 0.0017(10) -0.0102(11) 
C28 0.0332(11) 0.0345(12) 0.0297(11) 0.0067(9) 0.0165(9) 0.0115(9) 
C29 0.0579(16) 0.0520(15) 0.0321(13) 0.0070(11) 0.0253(12) 0.0203(13) 
C30 0.0512(18) 0.148(4) 0.0394(16) 0.0035(18) 0.0148(14) 0.059(2) 
C31 0.163(4) 0.0344(16) 0.133(4) -0.0239(19) 0.116(3) -0.020(2) 
C32 0.0247(10) 0.0342(11) 0.0242(10) 0.0066(8) 0.0097(8) 0.0030(8) 
F4 0.0972(14) 0.0716(12) 0.0338(9) 0.0041(8) -0.0077(9) -0.0342(11) 
F5 0.0930(16) 0.0566(12) 0.1122(18) -0.0228(11) 0.0128(13) 0.0196(11) 
F6 0.0988(15) 0.0772(13) 0.0533(10) 0.0152(9) 0.0086(10) -0.0585(11) 
O2 0.0326(9) 0.0461(11) 0.0762(14) 0.0145(9) 0.0163(9) 0.0072(8) 
O3 0.0530(11) 0.0479(11) 0.0393(10) 0.0107(8) -0.0084(8) -0.0139(9) 
C33 0.0272(11) 0.0359(12) 0.0307(11) 0.0080(9) 0.0122(9) -0.0037(9) 
C34 0.0445(14) 0.0418(14) 0.0337(13) 0.0086(10) 0.0004(11) -0.0102(11) 
  
_geom_special_details 
; 
 All esds (except the esd in the dihedral angle between two l.s. planes) 
 are estimated using the full covariance matrix.  The cell esds are taken 
 into account individually in the estimation of esds in distances, angles 
 and torsion angles; correlations between esds in cell parameters are only 
 used when they are defined by crystal symmetry.  An approximate (isotropic) 
 treatment of cell esds is used for estimating esds involving l.s. planes. 
; 
  
loop_ 
 _geom_bond_atom_site_label_1 
 _geom_bond_atom_site_label_2 
 _geom_bond_distance 
 _geom_bond_site_symmetry_2 
 _geom_bond_publ_flag 
Pd1 C32 1.983(2) . ? 
Pd1 O1 2.1550(12) . ? 
Pd1 P1 2.3576(5) . ? 
Pd1 P2 2.3646(5) . ? 
P1 C2 1.8274(19) . ? 
P1 C16 1.882(2) . ? 
P1 C20 1.892(2) . ? 
P2 C12 1.8304(19) . ? 
P2 C28 1.887(2) . ? 
P2 C24 1.895(2) . ? 
F1 C32 1.349(2) . ? 
F2 C32 1.355(2) . ? 
F3 C32 1.360(2) . ? 
O1 C1 1.414(2) . ? 
O1 C13 1.420(2) . ? 
C1 C6 1.388(3) . ? 
C1 C2 1.400(3) . ? 
C2 C3 1.403(3) . ? 
C3 C4 1.378(3) . ? 
C3 H3 0.9500 . ? 
C4 C5 1.374(3) . ? 
C4 H4 0.9500 . ? 
C5 C6 1.396(3) . ? 
C5 H5 0.9500 . ? 
C6 C7 1.517(3) . ? 
C7 C8 1.518(3) . ? 
C7 C14 1.539(3) . ? 
C7 C15 1.544(3) . ? 
C8 C13 1.389(3) . ? 
C8 C9 1.398(3) . ? 
C9 C10 1.373(3) . ? 
C9 H9 0.9500 . ? 
C10 C11 1.381(3) . ? 
C10 H10 0.9500 . ? 
C11 C12 1.400(3) . ? 
C11 H11 0.9500 . ? 
C12 C13 1.403(3) . ? 
C14 H14A 0.9800 . ? 
C14 H14B 0.9800 . ? 
C14 H14C 0.9800 . ? 
C15 H15A 0.9800 . ? 
C15 H15B 0.9800 . ? 
C15 H15C 0.9800 . ? 
C16 C18 1.523(3) . ? 
C16 C19 1.533(3) . ? 
C16 C17 1.535(4) . ? 
C17 H17A 0.9800 . ? 
C17 H17B 0.9800 . ? 
C17 H17C 0.9800 . ? 
C18 H18A 0.9800 . ? 
C18 H18B 0.9800 . ? 
C18 H18C 0.9800 . ? 
C19 H19A 0.9800 . ? 
C19 H19B 0.9800 . ? 
C19 H19C 0.9800 . ? 
C20 C21 1.538(3) . ? 
C20 C23 1.532(3) . ? 
C20 C22 1.536(3) . ? 
C21 H21A 0.9800 . ? 
C21 H21B 0.9800 . ? 
C21 H21C 0.9800 . ? 
C22 H22A 0.9800 . ? 
C22 H22B 0.9800 . ? 
C22 H22C 0.9800 . ? 
C23 H23A 0.9800 . ? 
C23 H23B 0.9800 . ? 
C23 H23C 0.9800 . ? 
C24 C26 1.532(3) . ? 
C24 C27 1.538(3) . ? 
C24 C25 1.535(3) . ? 
C25 H25A 0.9800 . ? 
C25 H25B 0.9800 . ? 
C25 H25C 0.9800 . ? 
C26 H26A 0.9800 . ? 
C26 H26B 0.9800 . ? 
C26 H26C 0.9800 . ? 
C27 H27A 0.9800 . ? 
C27 H27B 0.9800 . ? 
C27 H27C 0.9800 . ? 
C28 C31 1.501(4) . ? 
C28 C30 1.534(4) . ? 
C28 C29 1.519(3) . ? 
C29 H29A 0.9800 . ? 
C29 H29B 0.9800 . ? 
C29 H29C 0.9800 . ? 
C30 H30A 0.9800 . ? 
C30 H30B 0.9800 . ? 
C30 H30C 0.9800 . ? 
C31 H31A 0.9800 . ? 
C31 H31B 0.9800 . ? 
C31 H31C 0.9800 . ? 
F4 C34 1.326(3) . ? 
F5 C34 1.338(3) . ? 
F6 C34 1.332(3) . ? 
O2 C33 1.228(3) . ? 
O3 C33 1.226(3) . ? 
C33 C34 1.542(3) . ? 
  
loop_ 
 _geom_angle_atom_site_label_1 
 _geom_angle_atom_site_label_2 
 _geom_angle_atom_site_label_3 
 _geom_angle 
 _geom_angle_site_symmetry_1 
 _geom_angle_site_symmetry_3 
 _geom_angle_publ_flag 
C32 Pd1 O1 178.16(7) . . ? 
C32 Pd1 P1 96.69(6) . . ? 
O1 Pd1 P1 83.46(3) . . ? 
C32 Pd1 P2 96.31(6) . . ? 
O1 Pd1 P2 83.57(3) . . ? 
P1 Pd1 P2 166.963(18) . . ? 
C2 P1 C16 103.20(9) . . ? 
C2 P1 C20 106.33(9) . . ? 
C16 P1 C20 115.55(10) . . ? 
C2 P1 Pd1 97.94(6) . . ? 
C16 P1 Pd1 113.43(7) . . ? 
C20 P1 Pd1 117.28(7) . . ? 
C12 P2 C28 105.13(9) . . ? 
C12 P2 C24 105.39(9) . . ? 
C28 P2 C24 114.13(10) . . ? 
C12 P2 Pd1 97.72(6) . . ? 
C28 P2 Pd1 118.17(7) . . ? 
C24 P2 Pd1 113.52(7) . . ? 
C1 O1 C13 119.37(14) . . ? 
C1 O1 Pd1 120.29(10) . . ? 
C13 O1 Pd1 120.15(11) . . ? 
C6 C1 C2 122.70(17) . . ? 
C6 C1 O1 121.18(16) . . ? 
C2 C1 O1 116.12(16) . . ? 
C1 C2 C3 116.92(17) . . ? 
C1 C2 P1 122.07(14) . . ? 
C3 C2 P1 120.87(14) . . ? 
C4 C3 C2 121.62(18) . . ? 
C4 C3 H3 119.2 . . ? 
C2 C3 H3 119.2 . . ? 
C3 C4 C5 119.49(18) . . ? 
C3 C4 H4 120.3 . . ? 
C5 C4 H4 120.3 . . ? 
C4 C5 C6 121.75(19) . . ? 
C4 C5 H5 119.1 . . ? 
C6 C5 H5 119.1 . . ? 
C5 C6 C1 117.49(17) . . ? 
C5 C6 C7 118.27(17) . . ? 
C1 C6 C7 124.23(17) . . ? 
C6 C7 C8 109.97(15) . . ? 
C6 C7 C14 109.76(16) . . ? 
C8 C7 C14 108.88(17) . . ? 
C6 C7 C15 109.00(17) . . ? 
C8 C7 C15 110.19(16) . . ? 
C14 C7 C15 109.04(17) . . ? 
C13 C8 C9 117.30(18) . . ? 
C13 C8 C7 124.18(17) . . ? 
C9 C8 C7 118.51(17) . . ? 
C10 C9 C8 121.66(19) . . ? 
C10 C9 H9 119.2 . . ? 
C8 C9 H9 119.2 . . ? 
C9 C10 C11 119.75(19) . . ? 
C9 C10 H10 120.1 . . ? 
C11 C10 H10 120.1 . . ? 
C10 C11 C12 121.49(19) . . ? 
C10 C11 H11 119.3 . . ? 
C12 C11 H11 119.3 . . ? 
C11 C12 C13 116.85(18) . . ? 
C11 C12 P2 120.89(15) . . ? 
C13 C12 P2 122.25(14) . . ? 
C8 C13 C12 122.94(17) . . ? 
C8 C13 O1 121.03(16) . . ? 
C12 C13 O1 116.03(16) . . ? 
C7 C14 H14A 109.5 . . ? 
C7 C14 H14B 109.5 . . ? 
H14A C14 H14B 109.5 . . ? 
C7 C14 H14C 109.5 . . ? 
H14A C14 H14C 109.5 . . ? 
H14B C14 H14C 109.5 . . ? 
C7 C15 H15A 109.5 . . ? 
C7 C15 H15B 109.5 . . ? 
H15A C15 H15B 109.5 . . ? 
C7 C15 H15C 109.5 . . ? 
H15A C15 H15C 109.5 . . ? 
H15B C15 H15C 109.5 . . ? 
C18 C16 C19 109.0(2) . . ? 
C18 C16 C17 109.3(2) . . ? 
C19 C16 C17 107.98(19) . . ? 
C18 C16 P1 114.91(17) . . ? 
C19 C16 P1 111.17(15) . . ? 
C17 C16 P1 104.15(16) . . ? 
C16 C17 H17A 109.5 . . ? 
C16 C17 H17B 109.5 . . ? 
H17A C17 H17B 109.5 . . ? 
C16 C17 H17C 109.5 . . ? 
H17A C17 H17C 109.5 . . ? 
H17B C17 H17C 109.5 . . ? 
C16 C18 H18A 109.5 . . ? 
C16 C18 H18B 109.5 . . ? 
H18A C18 H18B 109.5 . . ? 
C16 C18 H18C 109.5 . . ? 
H18A C18 H18C 109.5 . . ? 
H18B C18 H18C 109.5 . . ? 
C16 C19 H19A 109.5 . . ? 
C16 C19 H19B 109.5 . . ? 
H19A C19 H19B 109.5 . . ? 
C16 C19 H19C 109.5 . . ? 
H19A C19 H19C 109.5 . . ? 
H19B C19 H19C 109.5 . . ? 
C21 C20 C23 107.34(18) . . ? 
C21 C20 C22 106.51(17) . . ? 
C23 C20 C22 110.82(19) . . ? 
C21 C20 P1 115.61(14) . . ? 
C23 C20 P1 104.87(14) . . ? 
C22 C20 P1 111.65(15) . . ? 
C20 C21 H21A 109.5 . . ? 
C20 C21 H21B 109.5 . . ? 
H21A C21 H21B 109.5 . . ? 
C20 C21 H21C 109.5 . . ? 
H21A C21 H21C 109.5 . . ? 
H21B C21 H21C 109.5 . . ? 
C20 C22 H22A 109.5 . . ? 
C20 C22 H22B 109.5 . . ? 
H22A C22 H22B 109.5 . . ? 
C20 C22 H22C 109.5 . . ? 
H22A C22 H22C 109.5 . . ? 
H22B C22 H22C 109.5 . . ? 
C20 C23 H23A 109.5 . . ? 
C20 C23 H23B 109.5 . . ? 
H23A C23 H23B 109.5 . . ? 
C20 C23 H23C 109.5 . . ? 
H23A C23 H23C 109.5 . . ? 
H23B C23 H23C 109.5 . . ? 
C26 C24 C27 107.89(19) . . ? 
C26 C24 C25 109.4(2) . . ? 
C27 C24 C25 108.03(18) . . ? 
C26 C24 P2 113.24(15) . . ? 
C27 C24 P2 113.64(16) . . ? 
C25 C24 P2 104.45(14) . . ? 
C24 C25 H25A 109.5 . . ? 
C24 C25 H25B 109.5 . . ? 
H25A C25 H25B 109.5 . . ? 
C24 C25 H25C 109.5 . . ? 
H25A C25 H25C 109.5 . . ? 
H25B C25 H25C 109.5 . . ? 
C24 C26 H26A 109.5 . . ? 
C24 C26 H26B 109.5 . . ? 
H26A C26 H26B 109.5 . . ? 
C24 C26 H26C 109.5 . . ? 
H26A C26 H26C 109.5 . . ? 
H26B C26 H26C 109.5 . . ? 
C24 C27 H27A 109.5 . . ? 
C24 C27 H27B 109.5 . . ? 
H27A C27 H27B 109.5 . . ? 
C24 C27 H27C 109.5 . . ? 
H27A C27 H27C 109.5 . . ? 
H27B C27 H27C 109.5 . . ? 
C31 C28 C30 110.3(3) . . ? 
C31 C28 C29 109.3(2) . . ? 
C30 C28 C29 105.8(2) . . ? 
C31 C28 P2 106.02(17) . . ? 
C30 C28 P2 114.66(18) . . ? 
C29 C28 P2 110.77(15) . . ? 
C28 C29 H29A 109.5 . . ? 
C28 C29 H29B 109.5 . . ? 
H29A C29 H29B 109.5 . . ? 
C28 C29 H29C 109.5 . . ? 
H29A C29 H29C 109.5 . . ? 
H29B C29 H29C 109.5 . . ? 
C28 C30 H30A 109.5 . . ? 
C28 C30 H30B 109.5 . . ? 
H30A C30 H30B 109.5 . . ? 
C28 C30 H30C 109.5 . . ? 
H30A C30 H30C 109.5 . . ? 
H30B C30 H30C 109.5 . . ? 
C28 C31 H31A 109.5 . . ? 
C28 C31 H31B 109.5 . . ? 
H31A C31 H31B 109.5 . . ? 
C28 C31 H31C 109.5 . . ? 
H31A C31 H31C 109.5 . . ? 
H31B C31 H31C 109.5 . . ? 
F1 C32 F2 103.31(16) . . ? 
F1 C32 F3 104.39(16) . . ? 
F2 C32 F3 104.47(16) . . ? 
F1 C32 Pd1 116.29(13) . . ? 
F2 C32 Pd1 115.04(13) . . ? 
F3 C32 Pd1 112.04(14) . . ? 
O3 C33 O2 132.1(2) . . ? 
O3 C33 C34 113.3(2) . . ? 
O2 C33 C34 114.6(2) . . ? 
F4 C34 F5 105.3(2) . . ? 
F4 C34 F6 106.8(2) . . ? 
F5 C34 F6 105.5(2) . . ? 
F4 C34 C33 114.7(2) . . ? 
F5 C34 C33 112.7(2) . . ? 
F6 C34 C33 111.2(2) . . ? 
  
loop_ 
 _geom_torsion_atom_site_label_1 
 _geom_torsion_atom_site_label_2 
 _geom_torsion_atom_site_label_3 
 _geom_torsion_atom_site_label_4 
 _geom_torsion 
 _geom_torsion_site_symmetry_1 
 _geom_torsion_site_symmetry_2 
 _geom_torsion_site_symmetry_3 
 _geom_torsion_site_symmetry_4 
 _geom_torsion_publ_flag 
C13 O1 C1 C6 1.3(3) . . . . ? 
Pd1 O1 C1 C6 176.42(13) . . . . ? 
C13 O1 C1 C2 -178.23(16) . . . . ? 
Pd1 O1 C1 C2 -3.1(2) . . . . ? 
C6 C1 C2 C3 0.3(3) . . . . ? 
O1 C1 C2 C3 179.85(16) . . . . ? 
C6 C1 C2 P1 -175.38(15) . . . . ? 
O1 C1 C2 P1 4.2(2) . . . . ? 
C16 P1 C2 C1 113.45(17) . . . . ? 
C20 P1 C2 C1 -124.52(16) . . . . ? 
Pd1 P1 C2 C1 -2.97(17) . . . . ? 
C16 P1 C2 C3 -62.06(18) . . . . ? 
C20 P1 C2 C3 59.97(18) . . . . ? 
Pd1 P1 C2 C3 -178.49(15) . . . . ? 
C1 C2 C3 C4 0.8(3) . . . . ? 
P1 C2 C3 C4 176.52(16) . . . . ? 
C2 C3 C4 C5 -0.8(3) . . . . ? 
C3 C4 C5 C6 -0.4(3) . . . . ? 
C4 C5 C6 C1 1.4(3) . . . . ? 
C4 C5 C6 C7 -177.48(19) . . . . ? 
C2 C1 C6 C5 -1.3(3) . . . . ? 
O1 C1 C6 C5 179.13(17) . . . . ? 
C2 C1 C6 C7 177.44(18) . . . . ? 
O1 C1 C6 C7 -2.1(3) . . . . ? 
C5 C6 C7 C8 179.66(17) . . . . ? 
C1 C6 C7 C8 0.9(3) . . . . ? 
C5 C6 C7 C14 -60.6(2) . . . . ? 
C1 C6 C7 C14 120.6(2) . . . . ? 
C5 C6 C7 C15 58.8(2) . . . . ? 
C1 C6 C7 C15 -120.0(2) . . . . ? 
C6 C7 C8 C13 1.0(3) . . . . ? 
C14 C7 C8 C13 -119.2(2) . . . . ? 
C15 C7 C8 C13 121.2(2) . . . . ? 
C6 C7 C8 C9 -179.60(17) . . . . ? 
C14 C7 C8 C9 60.1(2) . . . . ? 
C15 C7 C8 C9 -59.4(2) . . . . ? 
C13 C8 C9 C10 1.0(3) . . . . ? 
C7 C8 C9 C10 -178.4(2) . . . . ? 
C8 C9 C10 C11 -0.4(4) . . . . ? 
C9 C10 C11 C12 -0.6(4) . . . . ? 
C10 C11 C12 C13 1.0(3) . . . . ? 
C10 C11 C12 P2 -177.79(18) . . . . ? 
C28 P2 C12 C11 54.2(2) . . . . ? 
C24 P2 C12 C11 -66.7(2) . . . . ? 
Pd1 P2 C12 C11 176.21(17) . . . . ? 
C28 P2 C12 C13 -124.55(18) . . . . ? 
C24 P2 C12 C13 114.54(18) . . . . ? 
Pd1 P2 C12 C13 -2.53(18) . . . . ? 
C9 C8 C13 C12 -0.6(3) . . . . ? 
C7 C8 C13 C12 178.78(19) . . . . ? 
C9 C8 C13 O1 178.85(18) . . . . ? 
C7 C8 C13 O1 -1.8(3) . . . . ? 
C11 C12 C13 C8 -0.4(3) . . . . ? 
P2 C12 C13 C8 178.39(15) . . . . ? 
C11 C12 C13 O1 -179.85(18) . . . . ? 
P2 C12 C13 O1 -1.1(3) . . . . ? 
C1 O1 C13 C8 0.6(3) . . . . ? 
Pd1 O1 C13 C8 -174.53(14) . . . . ? 
C1 O1 C13 C12 -179.96(16) . . . . ? 
Pd1 O1 C13 C12 4.9(2) . . . . ? 
C2 P1 C16 C18 64.1(2) . . . . ? 
C20 P1 C16 C18 -51.5(2) . . . . ? 
Pd1 P1 C16 C18 168.9(2) . . . . ? 
C2 P1 C16 C19 -171.54(16) . . . . ? 
C20 P1 C16 C19 72.85(19) . . . . ? 
Pd1 P1 C16 C19 -66.69(18) . . . . ? 
C2 P1 C16 C17 -55.49(17) . . . . ? 
C20 P1 C16 C17 -171.10(15) . . . . ? 
Pd1 P1 C16 C17 49.36(17) . . . . ? 
C2 P1 C20 C21 -33.85(18) . . . . ? 
C16 P1 C20 C21 79.97(18) . . . . ? 
Pd1 P1 C20 C21 -142.10(14) . . . . ? 
C2 P1 C20 C23 84.13(15) . . . . ? 
C16 P1 C20 C23 -162.06(14) . . . . ? 
Pd1 P1 C20 C23 -24.12(16) . . . . ? 
C2 P1 C20 C22 -155.81(16) . . . . ? 
C16 P1 C20 C22 -41.99(19) . . . . ? 
Pd1 P1 C20 C22 95.95(16) . . . . ? 
C12 P2 C24 C26 158.14(18) . . . . ? 
C28 P2 C24 C26 43.3(2) . . . . ? 
Pd1 P2 C24 C26 -96.08(18) . . . . ? 
C12 P2 C24 C27 34.58(18) . . . . ? 
C28 P2 C24 C27 -80.26(18) . . . . ? 
Pd1 P2 C24 C27 140.35(15) . . . . ? 
C12 P2 C24 C25 -82.92(16) . . . . ? 
C28 P2 C24 C25 162.25(14) . . . . ? 
Pd1 P2 C24 C25 22.86(16) . . . . ? 
C12 P2 C28 C31 53.5(2) . . . . ? 
C24 P2 C28 C31 168.4(2) . . . . ? 
Pd1 P2 C28 C31 -54.2(2) . . . . ? 
C12 P2 C28 C30 -68.4(2) . . . . ? 
C24 P2 C28 C30 46.6(2) . . . . ? 
Pd1 P2 C28 C30 -176.1(2) . . . . ? 
C12 P2 C28 C29 171.88(17) . . . . ? 
C24 P2 C28 C29 -73.1(2) . . . . ? 
Pd1 P2 C28 C29 64.26(19) . . . . ? 
O3 C33 C34 F4 -152.2(2) . . . . ? 
O2 C33 C34 F4 26.1(3) . . . . ? 
O3 C33 C34 F5 -31.6(3) . . . . ? 
O2 C33 C34 F5 146.6(2) . . . . ? 
O3 C33 C34 F6 86.6(3) . . . . ? 
O2 C33 C34 F6 -95.2(2) . . . . ? 
  
_refine_diff_density_max    0.554 
_refine_diff_density_min   -0.421 
_refine_diff_density_rms    0.054 
  
_shelxl_version_number 2013-4 
  
_shelx_res_file 
; 
TITL mo_d8v181060_0m_a.res in P2(1)/c 
CELL 0.71073 12.8967 21.86 13.3517 90 110.424 90 
ZERR 4 0.0003 0.0005 0.0003 0 0.001 0 
LATT 1 
SYMM -X,0.5+Y,0.5-Z 
SFAC C  H  F  O  P  Pd 
UNIT 136 192 24 12 8 4 
OMIT 1 1 0 
OMIT  -3.00  52.00 
L.S. 9 
ACTA 
BOND $H 
FMAP 2 
PLAN 20 
LIST 4 
size 0.14 0.12 0.07 
wpdb -1 
mpla c8 > c13 
mpla c1 > c6 
htab 
conf 
TEMP -80.16 
WGHT    0.032800    3.012200 
EXTI    0.001860 
FVAR       0.48897 
PD1   6    0.537407    0.676854    0.482258    11.00000    0.01580    0.02149 = 
         0.01742    0.00385    0.00546    0.00043 
P1    5    0.343619    0.675617    0.437028    11.00000    0.01590    0.02064 = 
         0.01796    0.00182    0.00406    0.00033 
P2    5    0.731620    0.669202    0.565051    11.00000    0.01587    0.02653 = 
         0.01815    0.00337    0.00602   -0.00029 
F1    3    0.450969    0.750521    0.295412    11.00000    0.03753    0.04988 = 
         0.03708    0.02340    0.01431    0.01521 
F2    3    0.626325    0.752333    0.359391    11.00000    0.03866    0.04496 = 
         0.03887    0.01173    0.01768   -0.00802 
F3    3    0.542610    0.672828    0.274914    11.00000    0.05141    0.04908 = 
         0.02434    0.00002    0.01698    0.00448 
O1    4    0.536112    0.632324    0.625811    11.00000    0.01379    0.02714 = 
         0.02074    0.00734    0.00501    0.00151 
C1    1    0.434707    0.618956    0.639677    11.00000    0.01664    0.02014 = 
         0.02297    0.00058    0.00880   -0.00041 
C2    1    0.338920    0.639042    0.558445    11.00000    0.01973    0.02175 = 
         0.02198    0.00218    0.00778    0.00021 
C3    1    0.237464    0.626053    0.570714    11.00000    0.01756    0.02890 = 
         0.02898    0.00459    0.00671    0.00124 
AFIX  43 
H3    2    0.170731    0.638559    0.516687    11.00000   -1.20000 
AFIX   0 
C4    1    0.232250    0.595607    0.659193    11.00000    0.02178    0.03333 = 
         0.03633    0.00409    0.01535   -0.00059 
AFIX  43 
H4    2    0.162719    0.587706    0.666317    11.00000   -1.20000 
AFIX   0 
C5    1    0.328361    0.576766    0.737022    11.00000    0.02707    0.03130 = 
         0.02868    0.00794    0.01385    0.00132 
AFIX  43 
H5    2    0.324289    0.556006    0.798049    11.00000   -1.20000 
AFIX   0 
C6    1    0.431860    0.587316    0.728825    11.00000    0.02221    0.02170 = 
         0.02188    0.00244    0.00931    0.00135 
C7    1    0.533403    0.562625    0.816163    11.00000    0.02244    0.02482 = 
         0.02067    0.00581    0.00897    0.00266 
C8    1    0.636767    0.578580    0.792001    11.00000    0.02239    0.02504 = 
         0.01957    0.00156    0.00800    0.00208 
C9    1    0.739253    0.559288    0.863405    11.00000    0.02816    0.03692 = 
         0.01927    0.00896    0.00642    0.00589 
AFIX  43 
H9    2    0.741782    0.535855    0.924135    11.00000   -1.20000 
AFIX   0 
C10   1    0.836334    0.573355    0.847971    11.00000    0.02123    0.05009 = 
         0.02532    0.01053    0.00327    0.00872 
AFIX  43 
H10   2    0.905030    0.559962    0.897866    11.00000   -1.20000 
AFIX   0 
C11   1    0.833754    0.607050    0.759639    11.00000    0.01911    0.04859 = 
         0.02592    0.00896    0.00683    0.00344 
AFIX  43 
H11   2    0.901330    0.616955    0.749893    11.00000   -1.20000 
AFIX   0 
C12   1    0.733792    0.626945    0.684118    11.00000    0.01936    0.03352 = 
         0.01958    0.00604    0.00617    0.00083 
C13   1    0.636666    0.611888    0.703395    11.00000    0.01742    0.02363 = 
         0.01807    0.00271    0.00286    0.00387 
C14   1    0.542183    0.591127    0.924204    11.00000    0.03269    0.04988 = 
         0.02247    0.00073    0.01334    0.00494 
AFIX 137 
H14A  2    0.550615    0.635561    0.920997    11.00000   -1.50000 
H14B  2    0.606565    0.574083    0.980724    11.00000   -1.50000 
H14C  2    0.474959    0.581887    0.939699    11.00000   -1.50000 
AFIX   0 
C15   1    0.522449    0.492559    0.822804    11.00000    0.03142    0.02772 = 
         0.04591    0.01105    0.01457    0.00267 
AFIX 137 
H15A  2    0.457280    0.482851    0.841518    11.00000   -1.50000 
H15B  2    0.588817    0.476113    0.877629    11.00000   -1.50000 
H15C  2    0.514295    0.474226    0.753482    11.00000   -1.50000 
AFIX   0 
C16   1    0.271928    0.618670    0.329417    11.00000    0.03235    0.03646 = 
         0.02744   -0.01063    0.01124   -0.01259 
C17   1    0.336839    0.559094    0.367120    11.00000    0.09257    0.02587 = 
         0.04488   -0.00814    0.03097   -0.00673 
AFIX 137 
H17A  2    0.414493    0.565529    0.374982    11.00000   -1.50000 
H17B  2    0.305254    0.526790    0.314370    11.00000   -1.50000 
H17C  2    0.332210    0.546927    0.436080    11.00000   -1.50000 
AFIX   0 
C18   1    0.150395    0.607796    0.312736    11.00000    0.03930    0.10831 = 
         0.05990   -0.04414    0.01836   -0.03835 
AFIX 137 
H18A  2    0.143588    0.592630    0.379238    11.00000   -1.50000 
H18B  2    0.119910    0.577476    0.255968    11.00000   -1.50000 
H18C  2    0.109478    0.646285    0.292268    11.00000   -1.50000 
AFIX   0 
C19   1    0.282462    0.636750    0.222415    11.00000    0.04889    0.04525 = 
         0.02462   -0.00533    0.00766   -0.00563 
AFIX 137 
H19A  2    0.244549    0.675777    0.198369    11.00000   -1.50000 
H19B  2    0.248717    0.605045    0.169091    11.00000   -1.50000 
H19C  2    0.360853    0.640985    0.231399    11.00000   -1.50000 
AFIX   0 
C20   1    0.271590    0.751984    0.427014    11.00000    0.02653    0.02459 = 
         0.02866    0.00687    0.01076    0.00783 
C21   1    0.174591    0.753298    0.468887    11.00000    0.03178    0.03292 = 
         0.04213    0.00669    0.01827    0.01020 
AFIX 137 
H21A  2    0.117226    0.724600    0.427565    11.00000   -1.50000 
H21B  2    0.143677    0.794705    0.461362    11.00000   -1.50000 
H21C  2    0.201077    0.741426    0.544409    11.00000   -1.50000 
AFIX   0 
C22   1    0.225824    0.775166    0.311203    11.00000    0.04520    0.04935 = 
         0.03959    0.02173    0.01736    0.02557 
AFIX 137 
H22A  2    0.286076    0.777768    0.282577    11.00000   -1.50000 
H22B  2    0.192987    0.815756    0.309490    11.00000   -1.50000 
H22C  2    0.169208    0.746764    0.267650    11.00000   -1.50000 
AFIX   0 
C23   1    0.360788    0.795276    0.497289    11.00000    0.03740    0.02521 = 
         0.05225   -0.00634    0.01820   -0.00153 
AFIX 137 
H23A  2    0.390302    0.779048    0.570228    11.00000   -1.50000 
H23B  2    0.328422    0.835737    0.498238    11.00000   -1.50000 
H23C  2    0.420711    0.798742    0.468366    11.00000   -1.50000 
AFIX   0 
C24   1    0.801409    0.744961    0.616392    11.00000    0.02807    0.03413 = 
         0.02668   -0.00420    0.00828   -0.00958 
C25   1    0.709615    0.784583    0.631261    11.00000    0.04226    0.03441 = 
         0.03572   -0.01031    0.00862   -0.00045 
AFIX 137 
H25A  2    0.649818    0.789779    0.562267    11.00000   -1.50000 
H25B  2    0.739819    0.824723    0.659358    11.00000   -1.50000 
H25C  2    0.680589    0.764550    0.681654    11.00000   -1.50000 
AFIX   0 
C26   1    0.847207    0.776558    0.538139    11.00000    0.05874    0.04570 = 
         0.04471   -0.00616    0.02424   -0.02791 
AFIX 137 
H26A  2    0.908760    0.752506    0.531827    11.00000   -1.50000 
H26B  2    0.873498    0.817575    0.564640    11.00000   -1.50000 
H26C  2    0.788652    0.779798    0.467906    11.00000   -1.50000 
AFIX   0 
C27   1    0.895853    0.740133    0.725029    11.00000    0.02928    0.05433 = 
         0.03735   -0.00931    0.00170   -0.01017 
AFIX 137 
H27A  2    0.866916    0.723732    0.778364    11.00000   -1.50000 
H27B  2    0.927423    0.780799    0.747410    11.00000   -1.50000 
H27C  2    0.953397    0.712792    0.718534    11.00000   -1.50000 
AFIX   0 
C28   1    0.809399    0.619453    0.499757    11.00000    0.03324    0.03450 = 
         0.02973    0.00666    0.01649    0.01154 
C29   1    0.800024    0.644715    0.390988    11.00000    0.05791    0.05205 = 
         0.03210    0.00703    0.02529    0.02026 
AFIX 137 
H29A  2    0.722236    0.644670    0.344047    11.00000   -1.50000 
H29B  2    0.843168    0.619123    0.359634    11.00000   -1.50000 
H29C  2    0.828618    0.686655    0.399089    11.00000   -1.50000 
AFIX   0 
C30   1    0.933722    0.613664    0.562672    11.00000    0.05124    0.14813 = 
         0.03945    0.00350    0.01480    0.05884 
AFIX 137 
H30A  2    0.966388    0.654554    0.579269    11.00000   -1.50000 
H30B  2    0.969262    0.591404    0.519659    11.00000   -1.50000 
H30C  2    0.944953    0.591336    0.629287    11.00000   -1.50000 
AFIX   0 
C31   1    0.755203    0.557741    0.485792    11.00000    0.16284    0.03436 = 
         0.13277   -0.02393    0.11634   -0.01993 
AFIX 137 
H31A  2    0.768015    0.539394    0.556069    11.00000   -1.50000 
H31B  2    0.786726    0.531304    0.444460    11.00000   -1.50000 
H31C  2    0.675477    0.562228    0.447727    11.00000   -1.50000 
AFIX   0 
C32   1    0.538830    0.715203    0.348180    11.00000    0.02470    0.03423 = 
         0.02415    0.00661    0.00969    0.00299 
F4    3    0.060265    0.487692    0.730944    11.00000    0.09718    0.07163 = 
         0.03375    0.00410   -0.00771   -0.03421 
F5    3    0.209818    0.451969    0.839784    11.00000    0.09297    0.05663 = 
         0.11217   -0.02279    0.01284    0.01963 
F6    3    0.067335    0.456657    0.884713    11.00000    0.09881    0.07719 = 
         0.05328    0.01522    0.00863   -0.05853 
O2    4    0.093556    0.592578    0.838562    11.00000    0.03261    0.04609 = 
         0.07624    0.01454    0.01629    0.00724 
O3    4    0.245538    0.551105    0.958068    11.00000    0.05298    0.04786 = 
         0.03934    0.01074   -0.00836   -0.01391 
C33   1    0.157405    0.551166    0.882947    11.00000    0.02720    0.03586 = 
         0.03068    0.00799    0.01217   -0.00367 
C34   1    0.123029    0.487304    0.833513    11.00000    0.04454    0.04185 = 
         0.03370    0.00862    0.00035   -0.01024 
HKLF 4 
  
REM  mo_d8v181060_0m_a.res in P2(1)/c 
REM R1 =  0.0257 for    6358 Fo > 4sig(Fo)  and  0.0293 for all    6916 data 
REM    430 parameters refined using      0 restraints 
  
END 
  
WGHT      0.0236      3.2472 
  
REM Instructions for potential hydrogen bonds 
EQIV $1 x+1, y, z 
HTAB C11 O2_$1 
EQIV $2 -x, -y+1, -z+1 
HTAB C18 F6_$2 
HTAB C19 F3 
HTAB C22 F1 
EQIV $3 x, -y+3/2, z-1/2 
HTAB C22 O2_$3 
HTAB C26 F2 
HTAB C29 F3 
  
REM Highest difference peak  0.554,  deepest hole -0.421,  1-sigma level  0.054 
Q1    1   0.8938  0.5742  0.5627  11.00000  0.05    0.55 
Q2    1   0.0003  0.5028  0.7587  11.00000  0.05    0.44 
Q3    1   0.1719  0.4710  0.7768  11.00000  0.05    0.42 
Q4    1   0.4850  0.5730  0.7701  11.00000  0.05    0.36 
Q5    1   0.1888  0.5560  0.9799  11.00000  0.05    0.34 
Q6    1   0.2997  0.7184  0.4353  11.00000  0.05    0.32 
Q7    1   0.7761  0.6419  0.5249  11.00000  0.05    0.31 
Q8    1   0.4107  0.6797  0.4456  11.00000  0.05    0.31 
Q9    1   0.5342  0.5781  0.8640  11.00000  0.05    0.30 
Q10   1   0.3828  0.6267  0.5986  11.00000  0.05    0.29 
Q11   1   0.6934  0.5430  0.4928  11.00000  0.05    0.29 
Q12   1   0.7598  0.7114  0.5863  11.00000  0.05    0.28 
Q13   1   0.3006  0.6420  0.3734  11.00000  0.05    0.28 
Q14   1   0.7766  0.6810  0.3616  11.00000  0.05    0.28 
Q15   1   0.3408  0.6505  0.5039  11.00000  0.05    0.27 
Q16   1   0.4343  0.6007  0.6837  11.00000  0.05    0.27 
Q17   1   0.1678  0.4376  0.8788  11.00000  0.05    0.27 
Q18   1   0.0959  0.5895  0.9045  11.00000  0.05    0.26 
Q19   1   0.3816  0.5870  0.7421  11.00000  0.05    0.26 
Q20   1   0.5296  0.5306  0.8141  11.00000  0.05    0.25 
; 
_shelx_res_checksum   57090 
  
_shelx_hkl_file 
; 
   2   0   0 1577.04   43.00 
   2   0   0 1567.94   43.50 
  -2   0   0 1573.14   43.00 
  -2   0   0 1597.44   43.70 
  -4   0   0 3801.72  103.79 
   4   0   0 3851.01  102.19 
  -4   0   0 3805.72  102.49 
   4   0   0 3741.93  103.19 
  -5   0   0 2639.54   77.19 
  -5   0   0 2770.82   79.19 
   5   0   0 2794.12   76.99 
   5   0   0 2818.12   78.89 
   6   0   0    1.80    2.00 
   6   0   0    6.00    2.20 
  -6   0   0    6.80    2.80 
  -6   0   0    6.40    2.60 
  -7   0   0  117.09    9.30 
  -7   0   0  117.39   10.20 
   7   0   0  122.49    8.80 
   7   0   0  111.39    9.30 
  -8   0   0  243.48   16.40 
  -8   0   0  246.78   15.00 
   8   0   0  253.87   15.80 
   8   0   0  281.17   15.10 
  -9   0   0  921.41   38.20 
  -9   0   0  877.21   34.80 
   9   0   0  895.51   34.30 
 -10   0   0 6086.79  174.38 
 -10   0   0 6489.25  181.08 
  10   0   0 6229.48  173.78 
  11   0   0 5607.84  159.88 
 -11   0   0 5689.03  167.58 
  12   0   0  783.32   34.40 
 -12   0   0  737.53   38.80 
 -13   0   0  322.97   25.20 
  13   0   0  365.96   22.20 
 -14   0   0  718.53   41.40 
 -15   0   0 1120.19   55.89 
  15   0   0 1048.40   47.60 
  -1  -1   0    0.00    0.20 
  -1   1   0    0.10    0.10 
  -2  -1   0   57.19    3.90 
  -2  -1   0   61.99    3.40 
   2  -1   0   62.09    3.80 
   2  -1   0   65.59    3.90 
  -2   1   0   68.79    4.10 
  -2   1   0   63.19    3.90 
   2   1   0   68.69    4.10 
   2   1   0   61.09    3.40 
   3  -1   0 3758.22   99.39 
   3  -1   0 3951.70  100.49 
  -3  -1   0 3724.23   98.49 
  -3   1   0 3632.44   99.79 
   3   1   0 3783.42   98.49 
  -3   1   0 3732.23   99.69 
   3   1   0 3521.15  100.19 
  -4  -1   0 4824.42  131.69 
   4  -1   0 4930.81  133.29 
  -4  -1   0 5261.27  135.09 
   4  -1   0 5060.49  132.69 
  -4   1   0 4937.21  132.99 
  -4   1   0 4881.51  133.59 
   4   1   0 4977.80  131.69 
   4   1   0 5011.20  133.69 
  -5  -1   0 6646.94  177.38 
  -5  -1   0 6805.12  180.48 
   5  -1   0 6824.82  178.08 
   5  -1   0 6549.04  179.08 
   5   1   0 6560.44  179.08 
  -5   1   0 6656.73  178.68 
  -5   1   0 6905.31  180.18 
   5   1   0 6847.42  177.18 
  -6  -1   0 3422.36   96.89 
   6  -1   0 3573.14   97.69 
  -6  -1   0 3445.36  100.19 
   6  -1   0 3439.06   98.79 
   6   1   0 3574.74   99.79 
  -6   1   0 3479.05   99.89 
  -6   1   0 3426.36   98.29 
   6   1   0 3569.54   96.69 
   7  -1   0 2324.67   68.59 
  -7  -1   0 2311.27   71.89 
   7  -1   0 2270.87   69.99 
  -7  -1   0 2286.67   68.09 
   7   1   0 2333.57   67.49 
  -7   1   0 2301.97   69.49 
   7   1   0 2234.88   69.99 
  -7   1   0 2305.87   71.29 
   8  -1   0  839.72   34.50 
  -8  -1   0  830.42   34.80 
  -8  -1   0  803.32   31.00 
   8  -1   0  843.82   31.70 
   8   1   0  850.71   30.80 
  -8   1   0  856.21   34.50 
   8   1   0  815.42   33.80 
  -8   1   0  820.12   32.30 
  -9  -1   0 1546.25   54.99 
   9  -1   0 1549.14   50.59 
  -9  -1   0 1270.07   61.79 
  -9   1   0 1457.55   50.89 
  -9   1   0 1530.05   53.99 
   9   1   0 1460.25   50.79 
 -10  -1   0 3646.74  110.19 
 -10  -1   0 3858.51  117.89 
  10  -1   0 3794.82  111.69 
  10   1   0 3850.11  110.29 
 -10   1   0 3801.22  116.69 
  11  -1   0 1726.93   61.09 
 -11  -1   0 1767.62   67.09 
 -11   1   0 1833.42   66.79 
  11   1   0 1815.52   60.39 
 -12  -1   0   63.59   12.00 
  12  -1   0   69.69    9.00 
  12   1   0   63.39    9.80 
 -12   1   0   81.69   13.00 
 -13  -1   0    0.40    4.60 
  13  -1   0    3.30    3.20 
 -13   1   0   -6.30    3.80 
  13   1   0    5.70    3.90 
  14  -1   0    7.30    4.60 
 -14  -1   0    4.20    4.40 
  14   1   0   -4.60    3.60 
 -14   1   0    5.50    4.40 
  15  -1   0  276.17   22.20 
 -15  -1   0  287.37   26.20 
 -15   1   0  243.48   24.00 
  15   1   0  266.37   20.80 
  -2  -2   0  190.58    6.50 
   2  -2   0  184.68    7.90 
  -2  -2   0  192.38    8.60 
   2  -2   0  192.78    8.10 
  -2   2   0  191.38    8.00 
   2   2   0  172.38    8.10 
  -2   2   0  180.98    7.90 
   2   2   0  193.18    6.70 
   3  -2   0  544.25   18.30 
   3  -2   0  522.75   18.30 
  -3  -2   0  542.05   19.30 
  -3  -2   0  550.94   16.70 
  -3   2   0  521.85   18.40 
  -3   2   0  488.65   20.60 
   3   2   0  511.75   18.50 
   4  -2   0  120.59    7.50 
  -4  -2   0  129.39    8.40 
  -4  -2   0  114.19    6.40 
   4  -2   0  131.09    7.70 
   4   2   0  118.59    7.70 
  -4   2   0  119.09    7.80 
  -4   2   0  113.19    7.50 
   4   2   0  120.69    6.70 
  -5  -2   0   57.19    6.10 
  -5  -2   0   42.80    4.30 
   5  -2   0   40.30    4.60 
   5  -2   0   32.80    4.30 
   5   2   0   38.30    4.80 
  -5   2   0   30.40    4.80 
   5   2   0   33.00    4.10 
  -5   2   0   38.10    4.70 
   6  -2   0  308.67   15.00 
   6  -2   0  301.57   15.50 
  -6  -2   0  309.97   14.10 
  -6  -2   0  304.27   16.60 
   6   2   0  317.37   14.00 
   6   2   0  310.77   15.70 
  -6   2   0  324.17   16.20 
  -6   2   0  321.27   16.10 
  -7  -2   0  200.08   13.80 
  -7  -2   0  195.38   11.40 
   7  -2   0  214.88   12.70 
   7  -2   0  188.28   12.50 
   7   2   0  199.78   11.30 
   7   2   0  189.48   12.80 
  -7   2   0  202.08   13.30 
  -7   2   0  211.58   13.40 
   8  -2   0   40.50    8.10 
   8  -2   0   46.30    9.20 
  -8  -2   0   48.60    7.90 
  -8  -2   0   38.40    6.00 
   8   2   0   53.59    5.80 
   8   2   0   42.30    8.10 
  -8   2   0   38.50    7.30 
  -8   2   0   40.30    6.80 
   9  -2   0  289.97   17.00 
  -9  -2   0  297.87   16.10 
  -9  -2   0  277.67   19.20 
   9   2   0  307.47   16.10 
  -9   2   0  283.57   17.60 
  -9   2   0  286.87   18.50 
 -10  -2   0  406.66   20.90 
 -10  -2   0  416.36   25.70 
  10  -2   0  413.86   22.60 
 -10   2   0  431.26   24.90 
  10   2   0  447.66   21.40 
 -11  -2   0 1540.05   60.99 
  11  -2   0 1513.05   55.39 
 -11   2   0 1530.95   59.39 
  11   2   0 1590.84   53.59 
 -12  -2   0  712.23   38.60 
  12  -2   0  760.42   34.80 
  12   2   0  723.13   32.20 
 -12   2   0  752.22   38.20 
 -13  -2   0   34.20    8.10 
  13  -2   0   37.90    7.80 
  13   2   0   32.20    6.60 
 -13   2   0   31.60    8.20 
  14  -2   0  225.58   18.00 
 -14  -2   0  198.88   21.30 
 -14   2   0  173.38   18.90 
  14   2   0  221.78   17.20 
  15  -2   0  407.56   26.80 
 -15  -2   0  413.36   32.10 
  15   2   0  377.76   24.50 
 -15   2   0  406.86   30.60 
   0  -3   0    2.00    0.80 
   0  -3   0    2.00    0.80 
   0   3   0    2.70    0.90 
   1  -3   0   17.80    2.00 
   1  -3   0   15.40    1.90 
  -1  -3   0   14.40    2.40 
  -1  -3   0   18.10    1.60 
  -1   3   0   23.60    2.30 
  -1   3   0   18.80    2.00 
   1   3   0   13.00    2.20 
   2  -3   0  366.76   13.60 
   2  -3   0  366.26   13.50 
  -2  -3   0  367.46   11.50 
  -2  -3   0  378.66   14.70 
   2   3   0  385.46   14.50 
  -2   3   0  382.16   13.60 
   2   3   0  382.56   11.40 
   2   3   0  382.66   11.80 
  -2   3   0  376.66   13.60 
  -3  -3   0  109.49    7.30 
  -3  -3   0  106.99    5.00 
   3  -3   0   99.79    6.40 
   3  -3   0  107.29    6.50 
   3   3   0   99.79    6.70 
  -3   3   0  112.19    6.90 
   3   3   0  109.99    5.40 
  -3   3   0  102.69    6.40 
  -4  -3   0  386.66   17.00 
  -4  -3   0  367.96   13.20 
   4  -3   0  378.06   15.60 
   4  -3   0  381.46   15.60 
  -4   3   0  369.66   15.60 
   4   3   0  371.46   13.60 
  -4   3   0  367.26   15.80 
   4   3   0  365.66   15.90 
  -5  -3   0  131.59    9.80 
   5  -3   0  157.48    9.70 
  -5  -3   0  149.69    8.30 
   5  -3   0  145.79    9.40 
   5   3   0  157.18    9.90 
  -5   3   0  152.18    9.90 
  -5   3   0  162.08   10.00 
   5   3   0  152.38    8.20 
   6  -3   0  649.43   25.10 
  -6  -3   0  648.34   27.20 
  -6  -3   0  613.74   22.40 
   6  -3   0  633.54   25.20 
  -6   3   0  665.93   26.40 
  -6   3   0  603.44   25.20 
   6   3   0  640.34   25.60 
   6   3   0  673.03   23.00 
   7  -3   0  241.88   14.50 
   7  -3   0  260.57   14.70 
  -7  -3   0  260.37   16.30 
  -7  -3   0  256.97   12.90 
  -7   3   0  258.07   15.30 
   7   3   0  260.17   13.00 
   7   3   0  270.67   15.30 
  -7   3   0  261.37   15.40 
  -8  -3   0   14.90    5.00 
  -8  -3   0   14.10    3.40 
   8  -3   0   10.20    3.60 
  -8   3   0    6.80    4.00 
   8   3   0    8.60    3.10 
  -8   3   0    6.00    3.20 
  -9  -3   0   10.00    5.00 
   9  -3   0    5.60    3.50 
  -9  -3   0   13.30    3.70 
  -9   3   0    5.00    4.70 
  -9   3   0   16.60    5.40 
   9   3   0    4.20    2.60 
  10  -3   0  330.47   20.10 
 -10  -3   0  311.77   21.60 
 -10  -3   0  319.87   17.50 
  10   3   0  313.37   18.40 
 -10   3   0  331.37   21.10 
 -11  -3   0    8.10    4.60 
  11  -3   0    9.70    4.80 
 -11  -3   0   16.50    6.20 
 -11   3   0    6.40    5.00 
  11   3   0   15.50    4.60 
  12  -3   0   42.20    8.20 
 -12  -3   0   45.10   10.00 
 -12   3   0   42.90    9.60 
  12   3   0   42.10    7.20 
 -13  -3   0   11.70    6.20 
  13  -3   0   21.90    6.80 
 -13   3   0   15.10    6.10 
  13   3   0   19.70    4.60 
 -14  -3   0   31.40    9.40 
  14  -3   0   33.70    7.50 
 -14   3   0   22.90    8.70 
  14   3   0   15.80    6.40 
 -15  -3   0   10.10    7.20 
  15  -3   0    3.30    5.40 
  15   3   0   -0.50    5.50 
 -15   3   0   -3.50    6.00 
   0  -4   0 2272.67   61.59 
   0  -4   0 2205.58   60.39 
   0   4   0 2229.18   61.49 
   0   4   0 2259.17   59.99 
  -1  -4   0 2314.67   62.19 
  -1  -4   0 2340.07   65.79 
   1  -4   0 2319.47   63.59 
   1  -4   0 2334.67   64.19 
  -1   4   0 2312.47   63.29 
   1   4   0 2397.26   64.89 
   1   4   0 2361.26   61.99 
   1   4   0 2329.07   65.69 
   2  -4   0  279.87   14.00 
  -2  -4   0  310.17   10.00 
   2  -4   0  309.57   12.30 
  -2  -4   0  294.17   13.40 
   2   4   0  304.57    9.80 
   2   4   0  297.77   15.40 
   2   4   0  304.17   10.10 
  -2   4   0  293.67   12.00 
  -2   4   0  286.57   12.70 
   3  -4   0    1.80    1.10 
  -3  -4   0    1.50    0.80 
  -3  -4   0    0.80    1.10 
  -3   4   0    0.50    1.40 
   3   4   0    4.50    1.10 
   3   4   0   -0.30    0.70 
  -3   4   0    0.00    0.80 
   4  -4   0  622.84   23.10 
  -4  -4   0  668.13   25.60 
   4  -4   0  616.94   23.00 
  -4   4   0  635.34   23.20 
  -4   4   0  617.24   23.30 
   4   4   0  625.04   20.00 
   4   4   0  657.73   24.40 
   5  -4   0  169.28   10.60 
  -5  -4   0  170.38   12.00 
   5  -4   0  182.78   10.80 
  -5  -4   0  169.38    8.30 
   5   4   0  187.78    8.90 
  -5   4   0  189.58   11.20 
  -5   4   0  177.98   11.10 
   5   4   0  170.28   10.90 
   6  -4   0    0.00    1.40 
  -6  -4   0    2.70    2.60 
  -6  -4   0    0.90    1.40 
   6  -4   0    1.00    1.90 
  -6   4   0    1.20    2.20 
  -6   4   0    0.00    2.30 
   6   4   0    1.40    1.90 
   6   4   0   -2.30    1.20 
  -7  -4   0  104.89    7.40 
   7  -4   0  108.69   11.50 
   7  -4   0  118.89    9.80 
  -7  -4   0  115.79   11.00 
  -7   4   0  115.39    9.90 
   7   4   0  111.59    9.80 
  -7   4   0   85.09   12.50 
   7   4   0  105.79    7.80 
  -8  -4   0   32.30    7.20 
  -8  -4   0   34.40    4.50 
   8  -4   0   51.19    6.70 
   8   4   0   32.10    5.10 
  -8   4   0   31.80    6.90 
  -8   4   0   30.70    6.30 
   9  -4   0  106.09   10.60 
  -9  -4   0  105.79   11.80 
  -9  -4   0  113.09    9.00 
   9   4   0  124.39    9.30 
  -9   4   0  115.49   11.20 
 -10  -4   0  537.65   24.60 
 -10  -4   0  534.55   30.20 
  10  -4   0  557.84   27.30 
  10   4   0  519.55   23.20 
 -10   4   0  576.54   29.20 
 -11  -4   0  281.37   16.40 
 -11  -4   0  276.07   23.70 
  11  -4   0  245.48   18.10 
  11   4   0  277.77   16.30 
 -11   4   0  311.67   22.80 
 -12  -4   0   18.80    6.90 
  12  -4   0   16.30    5.40 
 -12   4   0   14.50    5.90 
  12   4   0   11.60    4.30 
 -13  -4   0   -6.60    3.90 
  13  -4   0    8.00    4.40 
  13   4   0    3.40    2.90 
 -13   4   0   -2.80    3.00 
 -14  -4   0   14.50    6.50 
  14  -4   0   12.60    5.70 
  14   4   0   14.40    4.80 
 -14   4   0   10.90    5.60 
 -15  -4   0   76.79   17.90 
  15  -4   0   67.59   12.10 
 -15   4   0   68.09   14.50 
  15   4   0   66.59   10.30 
   0  -5   0    3.30    1.50 
   0  -5   0    1.40    1.00 
   0   5   0    5.50    1.90 
   0   5   0    4.80    1.70 
   0   5   0    2.80    1.00 
   1  -5   0   33.20    3.30 
  -1  -5   0   34.80    2.90 
  -1  -5   0   37.50    4.30 
   1   5   0   34.90    3.60 
  -1   5   0   30.00    3.10 
  -1   5   0   29.40    3.20 
   1   5   0   29.40    6.60 
   1   5   0   35.00    2.80 
  -2  -5   0  942.31   27.70 
   2  -5   0  950.90   30.40 
  -2  -5   0  946.11   32.60 
   2  -5   0  951.50   30.70 
  -2   5   0 1036.00   30.80 
   2   5   0  950.20   32.20 
   2   5   0  990.80   27.90 
  -2   5   0  988.10   30.60 
   3  -5   0    9.00    2.30 
   3  -5   0   13.30    2.90 
  -3  -5   0    8.40    2.70 
   3   5   0    9.80    1.50 
   3   5   0    9.10    1.70 
  -3   5   0   13.10    2.70 
   3   5   0   10.20    2.60 
  -3   5   0   10.20    2.40 
  -4  -5   0 5282.27  147.19 
   4  -5   0 5458.95  144.69 
  -4  -5   0 5288.87  139.49 
   4  -5   0 5302.17  144.29 
  -4   5   0 5346.57  144.19 
  -4   5   0 5160.98  144.19 
   4   5   0 5433.66  139.99 
   4   5   0 5355.96  145.59 
   4   5   0 5480.55  139.49 
   5  -5   0 5341.97  149.39 
  -5  -5   0 5483.85  144.39 
   5  -5   0 5714.33  150.18 
  -5  -5   0 5502.15  152.78 
  -5   5   0 5527.25  149.69 
   5   5   0 5446.25  150.48 
   5   5   0 5620.24  144.69 
  -5   5   0 5338.57  149.79 
   6  -5   0 4804.12  136.59 
   6  -5   0 5154.08  137.09 
  -6  -5   0 5006.10  140.19 
  -6  -5   0 4866.51  130.79 
  -6  -5   0 4861.81  130.79 
   6   5   0 4972.00  131.29 
   6   5   0 4751.02  136.99 
  -6   5   0 4828.72  136.89 
  -6   5   0 5012.80  136.99 
  -7  -5   0 1900.91   55.29 
   7  -5   0 1865.41   60.49 
   7  -5   0 1921.11   60.79 
  -7  -5   0 1910.51   64.29 
  -7   5   0 1901.51   61.09 
   7   5   0 1838.22   60.79 
   7   5   0 1943.61   55.79 
  -7   5   0 1845.42   60.99 
  -8  -5   0  129.79    8.70 
   8  -5   0  137.19   11.30 
  -8  -5   0  129.99   12.70 
  -8   5   0  107.79   11.40 
   8   5   0  125.29    8.90 
  -8   5   0  146.79   12.10 
  -9  -5   0  782.02   37.20 
  -9  -5   0  752.82   29.00 
   9  -5   0  857.91   34.80 
  -9   5   0  814.42   35.00 
   9   5   0  796.12   29.10 
  10  -5   0  937.01   38.70 
 -10  -5   0  970.60   43.50 
 -10  -5   0  890.01   33.30 
 -10   5   0  961.00   40.30 
  10   5   0  823.52   32.50 
 -11  -5   0  120.19   10.40 
  11  -5   0  146.19   13.50 
 -11   5   0  129.09   25.90 
  11   5   0  134.69   10.40 
  12  -5   0    9.50    4.30 
 -12  -5   0    2.10    4.60 
 -12  -5   0   18.50    5.00 
 -12   5   0    9.30    4.70 
  12   5   0    6.80    3.60 
 -13  -5   0   13.10    8.10 
  13  -5   0   25.70    7.60 
  13   5   0   20.70    5.20 
 -13   5   0    6.20    5.60 
 -14  -5   0    4.90    6.70 
  14  -5   0   -0.50    4.60 
 -14   5   0    4.90    5.00 
  14   5   0    4.30    4.20 
  15  -5   0  113.99   15.40 
 -15  -5   0   91.99   17.20 
 -15   5   0  137.99   17.50 
  15   5   0  142.19   13.70 
   0  -6   0  570.44   20.50 
   0  -6   0  531.35   18.60 
   0   6   0  542.65   19.90 
   0   6   0  538.05   21.40 
   0   6   0  530.25   17.90 
   1  -6   0 5284.17  141.69 
  -1  -6   0 5272.67  144.09 
   1  -6   0 5285.57  140.69 
  -1  -6   0 5090.39  138.99 
   1   6   0 5327.97  138.49 
   1   6   0 5281.57  142.09 
  -1   6   0 5366.16  141.59 
   1   6   0 5638.84  144.89 
  -1   6   0 5205.18  139.89 
   2  -6   0 5847.31  156.88 
  -2  -6   0 6264.97  160.88 
  -2  -6   0 5478.35  153.28 
   2   6   0 5983.70  153.08 
  -2   6   0 5905.61  156.58 
  -2   6   0 5747.83  155.78 
   2   6   0 6005.90  159.38 
   3  -6   0    9.30    2.50 
   3  -6   0   10.40    2.70 
  -3  -6   0   10.10    3.10 
  -3   6   0   19.50    3.50 
   3   6   0   13.30    1.70 
   3   6   0   14.40    2.20 
  -3   6   0   10.70    2.70 
   3   6   0   12.30    3.20 
   4  -6   0 4576.44  124.19 
  -4  -6   0 4486.95  127.09 
   4  -6   0 4567.54  124.39 
   4   6   0 4584.64  117.89 
  -4   6   0 4540.45  123.59 
   4   6   0 4440.06  118.79 
  -4   6   0 4398.26  123.59 
   4   6   0 4440.46  125.29 
  -5  -6   0 2270.57   64.29 
  -5  -6   0 2373.66   73.59 
   5  -6   0 2426.56   70.69 
   5  -6   0 2298.37   69.79 
  -5   6   0 2393.66   70.19 
   5   6   0 2301.87   70.89 
   5   6   0 2372.56   64.39 
   5   6   0 2336.97   64.89 
  -5   6   0 2299.77   70.19 
   6  -6   0  238.98   14.30 
   6  -6   0  229.78   14.40 
  -6  -6   0  205.08   22.40 
  -6  -6   0  240.58   10.90 
   6   6   0  256.77   11.40 
   6   6   0  256.07   15.10 
   7  -6   0   12.70    4.00 
  -7  -6   0   15.70    4.70 
  -7  -6   0   12.60    2.80 
   7  -6   0   15.50    4.30 
   7   6   0    9.70    2.90 
  -7   6   0   16.20    4.50 
  -7   6   0   12.90    4.70 
   7   6   0   10.70    3.80 
  -8  -6   0   20.00    6.00 
   8  -6   0   26.10    6.10 
  -8  -6   0   19.00    3.70 
  -8   6   0   18.70    5.30 
   8   6   0   25.60    4.30 
  -9  -6   0  262.57   20.00 
  -9  -6   0  304.57   14.80 
   9  -6   0  288.87   18.30 
   9   6   0  263.47   14.10 
  -9   6   0  319.67   19.50 
  10  -6   0 1006.90   41.40 
 -10  -6   0  996.20   35.20 
 -10  -6   0  996.30   45.60 
  10   6   0  892.11   33.90 
 -10   6   0 1049.59   42.70 
  11  -6   0  534.65   28.60 
 -11  -6   0  525.55   32.10 
  11   6   0  523.45   27.30 
 -11   6   0  527.85   29.30 
 -12  -6   0  546.95   24.90 
  12  -6   0  511.95   29.70 
 -12  -6   0  535.95   33.90 
  12   6   0  531.45   24.40 
 -12   6   0  564.74   31.70 
 -13  -6   0   26.30    8.80 
  13  -6   0   26.20    7.30 
 -13   6   0   29.00    8.40 
  13   6   0   19.90    5.40 
  14  -6   0  419.26   28.90 
 -14  -6   0  427.86   33.10 
  14   6   0  456.65   23.40 
 -14   6   0  396.86   29.10 
  15  -6   0 1525.75   65.69 
 -15  -6   0 1588.34   74.29 
 -15   6   0 1515.35   67.99 
  15   6   0 1592.54   57.09 
   0  -7   0    1.30    1.10 
   0   7   0    7.20    2.40 
   0   7   0    8.00    2.20 
  -1  -7   0 1519.75   48.60 
  -1  -7   0 1504.55   46.50 
   1  -7   0 1502.25   45.10 
   1  -7   0 1566.54   46.90 
  -1  -7   0 1492.55   43.70 
   1   7   0 1503.25   42.90 
  -1   7   0 1489.65   46.00 
  -1   7   0 1497.95   44.30 
   1   7   0 1495.15   48.30 
   1   7   0 1487.15   46.50 
  -2  -7   0   23.90    4.70 
   2  -7   0   15.00    3.20 
  -2  -7   0   22.00    2.60 
   2  -7   0   26.50    4.30 
   2   7   0   21.20    2.50 
   2   7   0   38.40    5.90 
   2   7   0   22.70    4.00 
  -2   7   0   27.50    3.70 
  -2   7   0   25.00    4.10 
  -3  -7   0  330.47   17.40 
   3  -7   0  331.77   15.40 
  -3  -7   0  298.87   12.20 
   3  -7   0  339.97   16.00 
   3   7   0  333.17   12.20 
   3   7   0  330.87   16.80 
  -3   7   0  339.37   15.10 
  -3   7   0  334.27   15.20 
   3   7   0  309.07   11.60 
   4  -7   0 4531.25  121.29 
   4  -7   0 4142.69  120.09 
  -4  -7   0 4423.96  124.59 
  -4   7   0 4335.97  119.99 
   4   7   0 4432.06  113.79 
   4   7   0 4240.38  122.09 
  -4   7   0 4157.88  119.69 
   4   7   0 4449.15  115.09 
   6  -7   0 8661.13  226.38 
   6  -7   0 8260.47  225.38 
  -6  -7   0 8518.35  230.78 
  -6   7   0 8654.33  225.78 
   6   7   0 8699.43  218.28 
   6   7   0 8226.18  226.48 
  -6   7   0 8059.99  225.58 
   6   7   0 7888.81  222.68 
  -7  -7   0 1089.79   34.30 
   7  -7   0 1077.89   40.60 
  -7  -7   0 1080.89   44.10 
   7  -7   0 1068.99   41.80 
   7   7   0 1108.79   35.00 
   7   7   0 1144.49   34.50 
  -7   7   0 1031.70   40.60 
  -7   7   0 1086.89   40.40 
   7   7   0 1033.50   40.80 
   8  -7   0  557.74   26.70 
  -8  -7   0  546.15   21.10 
  -8  -7   0  535.65   29.20 
  -8   7   0  558.44   26.80 
   8   7   0  574.34   21.30 
   9  -7   0  686.83   31.80 
  -9  -7   0  700.43   26.10 
  -9  -7   0  748.93   36.30 
   9   7   0  632.24   25.00 
  -9   7   0  720.13   32.50 
 -10  -7   0  807.52   40.10 
 -10  -7   0  813.02   29.50 
  10  -7   0  780.22   35.90 
  10   7   0  663.63   27.30 
 -10   7   0  806.22   36.60 
 -11  -7   0  283.27   22.60 
  11  -7   0  291.47   20.60 
 -11  -7   0  288.57   15.90 
 -11   7   0  273.17   20.30 
  11   7   0  288.97   15.40 
 -12  -7   0   63.49   13.00 
  12  -7   0   49.20    9.50 
 -12  -7   0   71.59    8.50 
 -12   7   0   83.79   13.10 
  12   7   0   68.59    8.00 
  13  -7   0    1.70    4.90 
 -13  -7   0    5.50    4.50 
 -13  -7   0   -6.60    4.80 
  13   7   0   -1.70    3.10 
 -13   7   0   -7.30    2.70 
  14  -7   0   25.50    7.80 
 -14  -7   0   36.00   11.50 
 -14   7   0   35.90    9.20 
  14   7   0   30.60    6.30 
 -15  -7   0  182.98   22.10 
  15  -7   0  121.79   18.20 
  15   7   0  132.99   13.40 
 -15   7   0  135.09   17.30 
   0  -8   0  917.71   30.80 
   0  -8   0  923.21   32.50 
   0   8   0  941.91   29.90 
   0   8   0 1014.00   35.90 
   0   8   0  976.40   33.00 
  -1  -8   0 4751.02  128.79 
  -1  -8   0 4737.53  131.99 
  -1  -8   0 4925.61  135.19 
   1  -8   0 4816.82  131.89 
   1  -8   0 4889.11  130.49 
   1   8   0 4815.62  134.79 
   1   8   0 4872.71  132.49 
  -1   8   0 4908.91  131.79 
   1   8   0 4695.73  127.59 
  -1   8   0 4818.62  129.29 
  -2  -8   0  706.83   29.40 
   2  -8   0  722.23   26.40 
  -2  -8   0  719.33   23.90 
   2  -8   0  712.83   26.80 
   2   8   0  736.03   23.20 
  -2   8   0  729.33   26.70 
   2   8   0  751.02   28.00 
  -2   8   0  716.53   25.60 
   2   8   0  734.73   29.20 
   3  -8   0   60.89    6.10 
   3  -8   0   61.29    6.20 
  -3  -8   0   58.09    4.30 
  -3  -8   0   62.19    7.30 
  -3   8   0   63.59    6.00 
   3   8   0   52.19    6.50 
   3   8   0   59.69    4.30 
   3   8   0   54.89    4.20 
  -3   8   0   61.79    6.20 
   4  -8   0  726.93   28.00 
   4  -8   0  712.93   27.80 
  -4  -8   0  701.03   30.60 
   4   8   0  735.13   22.10 
  -4   8   0  724.03   27.40 
   4   8   0  669.03   28.70 
  -4   8   0  705.73   27.20 
   4   8   0  685.03   22.80 
   5  -8   0  781.82   31.50 
  -5  -8   0  873.81   35.90 
   5  -8   0  671.13   40.90 
   5   8   0  852.81   25.00 
   5   8   0  774.32   38.10 
   5   8   0  809.82   25.80 
  -5   8   0  776.22   30.50 
   6  -8   0  273.77   16.20 
   6  -8   0  271.97   16.50 
  -6  -8   0  301.87   19.50 
   6   8   0  278.57   12.40 
  -6   8   0  275.07   16.10 
   6   8   0  260.57   16.70 
  -6   8   0  266.07   16.60 
   6   8   0  289.17   12.00 
  -7  -8   0   18.30    6.20 
   7  -8   0   20.30    5.70 
  -7  -8   0   23.10    3.60 
   7   8   0   20.80    3.70 
   7   8   0   24.80    3.90 
  -7   8   0   15.80    4.60 
  -8  -8   0   33.30    4.20 
   8  -8   0   33.10    6.80 
  -8  -8   0   42.50    8.80 
   8   8   0   40.50    4.80 
  -8   8   0   36.20    7.50 
   8   8   0   34.20    4.90 
  -9  -8   0  622.94   23.50 
   9  -8   0  617.74   30.20 
  -9  -8   0  602.04   33.40 
  -9   8   0  632.64   30.20 
   9   8   0  632.74   24.20 
   9   8   0  527.65   22.00 
  10  -8   0 1153.68   46.60 
 -10  -8   0 1120.29   51.09 
 -10  -8   0 1131.89   37.90 
 -10   8   0 1151.78   46.20 
  10   8   0 1112.29   38.50 
  10   8   0  962.00   35.70 
 -11  -8   0  469.95   21.50 
 -11  -8   0  463.55   30.90 
 -11   8   0  477.75   28.10 
  11   8   0  509.55   21.20 
 -12  -8   0   52.19   11.20 
  12  -8   0   84.39   11.40 
 -12   8   0   81.49   10.40 
 -13  -8   0  335.87   19.40 
  13  -8   0  318.97   24.30 
 -13  -8   0  350.76   29.20 
 -13   8   0  337.07   25.40 
  13   8   0  364.26   18.80 
  14  -8   0  382.16   27.40 
 -14  -8   0  369.76   38.80 
  14   8   0  407.06   21.10 
 -14   8   0  382.06   34.80 
  15  -8   0  581.04   55.69 
 -15  -8   0  461.95   37.90 
 -15   8   0  518.85   34.60 
   0  -9   0    0.50    1.70 
   0  -9   0    3.50    1.90 
   0   9   0    1.40    1.30 
   0   9   0    0.10    1.80 
   0   9   0    2.20    1.80 
   1  -9   0   24.70    4.20 
   1  -9   0   32.40    5.30 
  -1  -9   0   41.50    5.20 
  -1  -9   0   45.80    4.60 
   1   9   0   49.00    5.90 
  -1   9   0   33.10    4.20 
  -1   9   0   24.20    4.40 
   1   9   0   33.90    3.60 
   1   9   0   43.80    5.40 
  -2  -9   0 1152.08   42.00 
   2  -9   0 1125.79   37.90 
  -2  -9   0 1153.18   35.30 
   2  -9   0 1093.59   38.50 
  -2   9   0 1115.99   36.80 
   2   9   0 1119.19   34.00 
   2   9   0 1097.09   40.90 
  -2   9   0 1178.88   38.70 
   2   9   0 1121.69   39.40 
   3  -9   0   17.70    4.10 
  -3  -9   0   15.40    4.40 
  -3  -9   0   19.90    3.10 
   3  -9   0   23.10    4.60 
  -3   9   0   26.10    4.40 
  -3   9   0   30.20    5.10 
   3   9   0   27.10    3.00 
   3   9   0   24.80    5.30 
   3   9   0   18.30    4.40 
  -4  -9   0 1844.92   62.99 
   4  -9   0 1938.51   59.89 
   4  -9   0 1783.12   58.79 
   4   9   0 1837.32   61.09 
  -4   9   0 1908.71   58.69 
   4   9   0 1921.51   52.19 
   4   9   0 1875.11   52.79 
  -4   9   0 1795.32   57.89 
   5  -9   0 1639.94   53.59 
   5  -9   0 1587.34   52.69 
  -5  -9   0 1549.45   56.39 
  -5   9   0 1569.44   51.59 
   5   9   0 1578.04   44.20 
   5   9   0 1512.65   53.59 
   5   9   0 1564.54   45.50 
  -5   9   0 1494.65   51.49 
  -6  -9   0 2967.80   95.99 
   6  -9   0 3165.48   92.49 
   6  -9   0 2949.51   91.09 
   6   9   0 3020.40   83.39 
  -6   9   0 2925.51   90.99 
  -6   9   0 3067.89   90.79 
   6   9   0 3083.09   82.29 
   6   9   0 3014.60   92.69 
   7  -9   0 1034.50   40.50 
  -7  -9   0  965.10   43.30 
   7   9   0 1042.20   32.20 
  -7   9   0 1063.99   39.90 
   7   9   0  982.20   32.80 
  -8  -9   0   16.50    6.10 
   8  -9   0   14.20    4.60 
  -8  -9   0   12.40    2.70 
   8   9   0    7.10    2.60 
   8   9   0   12.30    3.10 
  -8   9   0    7.00    3.80 
  -9  -9   0  682.93   35.90 
   9  -9   0  612.94   30.80 
  -9  -9   0  598.04   23.30 
   9   9   0  624.04   24.00 
  -9   9   0  643.54   30.70 
   9   9   0  537.45   21.80 
 -10  -9   0  558.64   34.00 
 -10  -9   0  507.15   21.40 
  10  -9   0  486.75   28.30 
  10   9   0  547.75   22.30 
  10   9   0  441.06   19.50 
 -10   9   0  544.05   29.70 
 -11  -9   0   34.40    6.00 
 -11  -9   0   47.30   10.80 
  11  -9   0   34.80    8.00 
 -11   9   0   35.60    8.10 
  11   9   0   48.80    5.70 
  11   9   0   37.60    5.70 
 -12  -9   0   12.70    6.50 
  12  -9   0   21.40    6.10 
 -12  -9   0   27.20    5.40 
  12   9   0   20.60    5.00 
 -12   9   0   26.00    7.30 
  12   9   0   23.50    4.60 
 -13  -9   0    7.30    5.40 
 -13  -9   0    8.80    7.10 
  13  -9   0    0.10    4.30 
 -13   9   0    9.40    5.10 
  13   9   0    6.50    3.40 
  14  -9   0   51.39   12.30 
 -14  -9   0   44.50   13.40 
  14   9   0   51.19    7.80 
 -14   9   0   50.99   10.90 
   0 -10   0 1549.64   48.00 
   0 -10   0 1499.75   49.99 
   0  10   0 1518.75   46.10 
   0  10   0 1581.74   53.49 
  -1 -10   0    0.60    1.90 
   1 -10   0    1.50    1.80 
   1 -10   0    3.20    1.90 
   1  10   0    0.70    1.10 
   1  10   0    2.10    1.80 
   1  10   0    3.40    2.50 
  -1  10   0    1.20    1.60 
  -2 -10   0 2641.04   82.19 
   2 -10   0 2554.34   78.09 
   2 -10   0 2636.64   77.39 
  -2 -10   0 2566.14   73.99 
  -2  10   0 2633.94   77.89 
  -2  10   0 2569.84   75.59 
   2  10   0 2625.84   72.49 
   2  10   0 2607.94   79.29 
   2  10   0 2707.23   82.69 
  -3 -10   0    0.40    1.10 
   3 -10   0    1.10    1.80 
  -3 -10   0    0.30    1.90 
   3  10   0   -0.10    1.10 
   3  10   0   -1.00    1.00 
  -3  10   0   -0.10    1.40 
   3  10   0    0.20    2.40 
  -3  10   0   -1.20    1.40 
   4 -10   0  343.07   18.30 
   4 -10   0  310.97   25.10 
   4  10   0  359.46   20.10 
  -4  10   0  324.97   18.40 
   4  10   0  345.87   13.40 
   4  10   0  348.47   13.70 
  -5 -10   0   54.39    9.60 
   5 -10   0   64.79    7.90 
   5 -10   0   63.79    7.70 
  -5  10   0   69.79    7.60 
  -5  10   0   84.59    8.60 
   5  10   0   66.59    4.60 
   5  10   0   60.89    5.10 
   5  10   0   77.19    8.80 
  -6 -10   0   26.40    7.10 
   6 -10   0   35.90    6.90 
   6  10   0   36.10    4.10 
   6  10   0   38.10    4.30 
  -6  10   0   34.10    6.60 
  -7 -10   0    7.80    4.80 
   7 -10   0    4.20    3.30 
   7  10   0    5.30    3.10 
  -7  10   0    5.20    3.50 
   7  10   0    3.80    2.30 
   8 -10   0    4.80    3.20 
  -8 -10   0    6.10    4.30 
   8  10   0   12.00    2.90 
   8  10   0   11.70    2.90 
  -8  10   0   10.90    4.30 
  -9 -10   0   36.50    8.70 
   9 -10   0   45.80    8.80 
  -9  10   0   45.40    8.50 
   9  10   0   28.40    4.30 
   9  10   0   37.90    5.40 
  10 -10   0    4.50    3.80 
 -10 -10   0   -1.20    3.50 
  10  10   0    1.00    2.50 
  10  10   0    1.10    2.10 
  11 -10   0   20.60    6.90 
 -11 -10   0   20.90    7.30 
 -11 -10   0   10.70    3.80 
 -11  10   0   34.70    8.60 
  11  10   0   17.50    4.50 
 -12 -10   0   11.90    3.90 
 -12 -10   0   -2.10    3.90 
  12 -10   0   -2.00    3.40 
  12  10   0   10.10    4.20 
 -12  10   0   17.90    5.90 
  12  10   0    5.30    3.10 
 -13 -10   0   77.49   15.10 
  13 -10   0   52.99   11.80 
  13  10   0   81.49    8.10 
 -13  10   0   57.69   11.50 
 -14 -10   0   19.40    8.00 
  14 -10   0    4.70    5.30 
 -14  10   0    5.30    6.10 
   0 -11   0    0.40    1.60 
   0 -11   0    0.70    1.30 
   0  11   0    0.70    2.70 
   0  11   0    1.90    1.70 
   0  11   0   12.50    3.90 
  -1 -11   0  110.39    9.40 
  -1 -11   0  105.19    8.00 
   1 -11   0   92.99    8.70 
   1 -11   0  108.19    8.70 
  -1  11   0  107.39    9.10 
   1  11   0   92.39    8.90 
   1  11   0  104.79    7.00 
  -1  11   0  102.69    7.60 
   1  11   0  116.19   10.70 
  -2 -11   0  300.67   18.40 
   2 -11   0  257.57   15.40 
   2 -11   0  276.87   15.30 
  -2 -11   0  252.07   13.00 
   2  11   0  278.77   16.30 
   2  11   0  259.07   12.00 
   2  11   0  292.07   17.90 
  -2  11   0  259.17   14.00 
  -2  11   0  263.87   15.30 
  -3 -11   0    5.50    1.90 
   3 -11   0    2.80    2.00 
  -3 -11   0    4.90    5.30 
   3 -11   0    2.10    2.40 
   3  11   0    9.80    4.40 
  -3  11   0    2.60    2.10 
   3  11   0    5.80    1.90 
   4 -11   0  635.64   27.60 
   4 -11   0  597.84   27.30 
  -4 -11   0  597.74   21.40 
  -4 -11   0  654.53   31.70 
   4  11   0  635.64   29.50 
   4  11   0  627.84   28.80 
  -4  11   0  590.74   25.90 
   4  11   0  609.14   23.70 
   4  11   0  630.44   21.50 
  -4  11   0  623.04   26.80 
   5 -11   0  761.72   32.20 
   5 -11   0  677.83   30.90 
  -5 -11   0  760.22   35.70 
  -5  11   0  752.02   31.40 
  -5  11   0  774.32   31.30 
   5  11   0  743.93   23.80 
   5  11   0  763.02   24.80 
   5  11   0  721.53   33.00 
   6 -11   0  312.27   19.40 
  -6 -11   0  347.47   23.00 
   6  11   0  318.57   13.70 
   6  11   0  333.67   13.00 
  -6  11   0  345.47   19.30 
   7 -11   0  214.68   16.10 
  -7 -11   0  196.08   17.60 
  -7  11   0  217.38   15.40 
   7  11   0  201.98   10.00 
   8 -11   0   42.60    8.70 
  -8 -11   0   54.69   10.60 
   8  11   0   43.20    4.80 
  -8  11   0   37.10    7.20 
   8  11   0   44.00    4.80 
   9 -11   0  331.77   22.30 
  -9 -11   0  327.87   25.00 
   9  11   0  266.87   12.90 
   9  11   0  319.97   14.80 
  -9  11   0  317.47   20.80 
 -10 -11   0  211.98   20.60 
  10 -11   0  243.68   19.50 
  10  11   0  224.98   12.50 
 -10  11   0  235.78   18.20 
  10  11   0  212.38   11.00 
 -11 -11   0  188.28   19.20 
  11 -11   0  180.08   17.60 
  11  11   0  165.88   10.10 
  11  11   0  193.18   11.80 
 -11  11   0  170.38   16.80 
 -12 -11   0   -5.70    4.20 
  12 -11   0    4.30    4.50 
 -12  11   0    4.70    4.20 
  12  11   0    6.20    2.20 
  12  11   0   -3.70    3.00 
  13 -11   0    1.30    4.90 
 -13 -11   0    4.20    7.60 
  13  11   0   -0.20    2.70 
 -13  11   0    6.10    5.10 
 -14 -11   0   10.80    8.90 
  14 -11   0   -0.30    9.60 
 -14  11   0   19.00    6.70 
   0 -12   0 3582.04  114.69 
   0 -12   0 3822.62  106.29 
   0  12   0 3834.72  109.29 
   0  12   0 3528.95  134.79 
   0  12   0 3811.92  103.79 
   1 -12   0 3217.38   91.89 
  -1 -12   0 3168.98   89.89 
  -1  12   0 3111.59   95.79 
   1  12   0 2971.60   95.59 
  -1  12   0 3093.79   88.89 
   1  12   0 3146.49   87.29 
  -2 -12   0 2389.76   69.39 
  -2 -12   0 2279.67   77.49 
   2 -12   0 2417.66   72.79 
   2 -12   0 2289.57   73.59 
   2  12   0 2360.36   74.89 
  -2  12   0 2304.67   70.19 
   2  12   0 2326.17   66.89 
  -2  12   0 2377.66   73.39 
   2  12   0 2407.26   77.79 
  -3 -12   0  417.46   24.20 
   3 -12   0  403.56   21.30 
  -3 -12   0  420.46   17.60 
   3 -12   0  409.46   21.40 
  -3  12   0  414.16   20.90 
   3  12   0  446.86   22.80 
  -3  12   0  404.86   19.60 
   3  12   0  400.56   23.00 
   3  12   0  410.46   16.30 
   4 -12   0    7.10    3.60 
   4 -12   0   15.20    4.20 
  -4 -12   0   10.70    4.70 
  -4 -12   0    7.80    2.30 
   4  12   0   13.60    2.70 
  -4  12   0   11.80    3.80 
  -4  12   0    3.20    2.40 
   4  12   0   26.50    6.40 
   4  12   0   12.20    2.60 
   4  12   0    9.60    4.30 
  -5 -12   0  490.55   28.10 
   5 -12   0  500.45   25.20 
  -5  12   0  484.15   23.90 
   5  12   0  494.35   17.70 
  -6 -12   0  160.18   15.50 
   6 -12   0  140.99   13.00 
   6  12   0  164.78    8.20 
  -6  12   0  152.78   12.50 
   6  12   0  148.89    9.90 
   7 -12   0    6.90    3.80 
  -7 -12   0    7.60    4.60 
   7  12   0    7.70    2.40 
  -7  12   0   12.20    4.90 
  -8 -12   0   17.10    5.70 
   8 -12   0   30.70    7.10 
   8  12   0   22.60    4.40 
  -8  12   0   26.70    6.60 
   8  12   0   18.30    3.30 
  -9 -12   0  326.67   26.30 
   9 -12   0  339.37   23.30 
  -9  12   0  323.57   22.80 
   9  12   0  288.37   13.00 
   9  12   0  344.07   14.80 
  10 -12   0  403.66   26.10 
 -10 -12   0  339.67   27.30 
  10  12   0  361.56   14.80 
  10  12   0  382.76   16.60 
 -10  12   0  366.56   24.30 
  11 -12   0  933.41   45.50 
 -11 -12   0  954.90   50.79 
  11  12   0  963.00   30.90 
  11  12   0  928.41   32.80 
 -11  12   0  996.80   44.70 
  12 -12   0  217.48   20.60 
 -12 -12   0  212.48   22.90 
  12  12   0  233.18   11.60 
 -12  12   0  209.28   18.80 
 -13 -12   0   33.60   10.10 
  13 -12   0   22.00    7.40 
 -13  12   0   37.80    8.00 
 -14 -12   0  295.47   27.80 
  14 -12   0  281.97   24.80 
 -14  12   0  240.88   23.10 
   0 -13   0    2.80    2.20 
   0 -13   0    2.30    2.20 
   0  13   0    2.80    2.80 
   0  13   0   -2.60    1.60 
  -1 -13   0  104.29    9.90 
   1 -13   0  123.39   10.00 
   1 -13   0  101.79   10.10 
  -1 -13   0  108.49    9.00 
  -1  13   0  110.69   11.80 
  -1  13   0  113.09    8.80 
   1  13   0  116.59   10.90 
   1  13   0  101.49    7.70 
   1  13   0  102.79   11.50 
  -1  13   0  121.69   10.70 
   2 -13   0  617.64   27.30 
  -2 -13   0  610.04   24.40 
   2 -13   0  561.44   27.00 
   2  13   0  574.64   29.60 
   2  13   0  595.64   22.20 
  -2  13   0  607.84   27.30 
   2  13   0  608.54   28.40 
  -3 -13   0  636.64   32.20 
  -3 -13   0  610.84   23.90 
   3 -13   0  653.13   28.60 
   3 -13   0  604.94   28.30 
  -3  13   0  638.04   28.10 
   3  13   0  678.63   31.00 
   3  13   0  584.54   30.40 
   3  13   0  620.74   22.40 
  -3  13   0  587.64   26.00 
  -4 -13   0  409.56   25.40 
  -4 -13   0  400.46   17.00 
   4 -13   0  448.26   23.10 
   4  13   0  406.36   17.00 
   4  13   0  434.36   16.60 
  -4  13   0  363.06   21.70 
   4  13   0  415.96   23.50 
  -4  13   0  427.66   22.10 
  -5 -13   0 1047.80   47.10 
   5 -13   0 1156.48   44.10 
   5  13   0 1111.09   34.20 
   5  13   0 1067.79   44.90 
  -5  13   0 1147.09   42.80 
   5  13   0 1089.79   34.30 
   6 -13   0 1015.90   42.20 
  -6 -13   0 1017.80   46.60 
  -6  13   0 1060.69   41.60 
   6  13   0  966.60   30.80 
   7 -13   0  249.18   18.40 
  -7 -13   0  219.38   19.40 
  -7  13   0  218.18   16.20 
   7  13   0  202.78    9.90 
   8 -13   0  242.38   18.40 
  -8 -13   0  206.18   19.40 
   8  13   0  188.38    9.50 
  -8  13   0  198.18   16.00 
  -9 -13   0 1000.20   49.60 
   9 -13   0 1074.19   46.30 
  -9  13   0 1014.50   43.10 
   9  13   0  867.11   29.60 
 -10 -13   0  516.65   35.00 
  10 -13   0  535.65   31.60 
  10  13   0  444.76   17.40 
  10  13   0  563.04   23.90 
 -10  13   0  516.05   29.70 
 -11 -13   0  352.66   28.90 
  11 -13   0  267.87   22.70 
  11  13   0  296.87   12.30 
  11  13   0  287.37   13.50 
 -11  13   0  266.07   21.30 
  12 -13   0   41.60   10.20 
 -12 -13   0   34.70   11.60 
 -12  13   0   24.30    7.70 
  12  13   0   39.40    4.30 
  13 -13   0    3.70    4.70 
 -13 -13   0   25.70   10.70 
 -13  13   0    6.50    5.00 
   0 -14   0 5518.25  151.48 
   0 -14   0 5218.88  153.98 
   0  14   0 5393.46  159.38 
   0  14   0 5583.14  155.18 
   0  14   0 5371.26  147.79 
  -1 -14   0 2076.79   63.49 
  -1 -14   0 1903.71   66.29 
   1 -14   0 2014.40   64.79 
   1 -14   0 1950.30   66.39 
  -1  14   0 1958.60   61.59 
  -1  14   0 1898.61   69.99 
   1  14   0 2057.69   71.29 
   1  14   0 2122.89   68.09 
  -1  14   0 2019.00   66.49 
   1  14   0 2020.20   60.19 
   2 -14   0  700.13   39.30 
  -2 -14   0  848.02   30.80 
   2 -14   0  816.22   33.30 
   2  14   0  778.12   34.40 
  -2  14   0  780.82   33.30 
  -2  14   0  785.72   30.60 
   2  14   0  778.42   27.70 
   2  14   0  748.23   44.30 
   3 -14   0 1020.10   39.80 
  -3 -14   0  984.10   34.70 
  -3 -14   0  955.90   43.50 
  -3  14   0  966.20   37.00 
   3  14   0  982.40   32.60 
  -3  14   0 1049.40   39.80 
   3  14   0  986.20   41.00 
  -4 -14   0  409.56   26.00 
   4 -14   0  401.86   22.90 
  -4 -14   0  410.46   17.90 
  -4  14   0  406.36   22.30 
   4  14   0  428.96   18.10 
   4  14   0  431.26   24.50 
   4  14   0  428.36   16.90 
   5 -14   0   75.79    9.50 
  -5 -14   0   69.69   12.00 
   5  14   0   65.99   10.80 
   5  14   0   63.99    5.40 
  -5  14   0   68.99    8.50 
   5  14   0   74.29    5.70 
  -6 -14   0    4.40    4.20 
   6 -14   0    3.30    3.10 
   6  14   0    1.90    1.60 
   6  14   0    0.90    1.60 
  -6  14   0    4.90    3.30 
   6  14   0   -2.70    1.70 
  -7 -14   0    0.60    4.20 
   7 -14   0    1.10    3.10 
  -7  14   0    1.70    3.00 
   7  14   0   -0.30    1.50 
   8 -14   0   96.69   12.80 
  -8 -14   0   90.69   14.80 
   8  14   0   84.89    6.50 
   8  14   0   72.19    5.60 
  -8  14   0   75.09    9.80 
   9 -14   0  203.78   18.20 
  -9 -14   0  188.78   19.40 
   9  14   0  204.58    9.80 
   9  14   0  175.68    8.50 
  -9  14   0  230.18   18.20 
 -10 -14   0  836.32   47.50 
  10 -14   0  891.61   44.10 
  10  14   0  903.21   27.80 
 -10  14   0  893.41   41.80 
  10  14   0  842.82   26.30 
 -11 -14   0 1101.99   58.49 
  11 -14   0 1163.98   54.29 
  11  14   0 1203.68   35.30 
  11  14   0 1199.58   34.20 
 -11  14   0 1210.28   52.69 
  12 -14   0  368.66   27.70 
 -12 -14   0  333.27   30.10 
 -12  14   0  330.37   25.30 
 -13 -14   0  136.89   21.50 
  13 -14   0   92.89   16.40 
 -13  14   0  104.09   16.10 
   0 -15   0    5.00    3.40 
   0  15   0    4.30    2.30 
   0  15   0    3.60    3.70 
   1 -15   0   35.50    7.10 
  -1 -15   0   20.90    5.10 
   1  15   0   37.90    5.10 
  -1  15   0   29.70    5.30 
  -1  15   0   27.10    6.40 
   1  15   0   34.20    7.30 
   2 -15   0  163.08   13.20 
  -2 -15   0  144.39   11.00 
  -2  15   0  148.69   12.70 
   2  15   0  140.09   13.00 
  -2  15   0  130.69   11.00 
   2  15   0  154.78    9.60 
  -3 -15   0  472.75   21.10 
   3 -15   0  497.35   25.50 
  -3 -15   0  443.76   27.70 
  -3  15   0  453.85   24.30 
   3  15   0  492.55   26.60 
   3  15   0  461.25   19.00 
   4 -15   0  702.73   33.10 
  -4 -15   0  695.43   37.00 
  -4 -15   0  725.33   26.80 
  -4  15   0  699.63   32.20 
   4  15   0  708.63   25.10 
   4  15   0  738.23   35.60 
   5 -15   0 1279.67   49.80 
  -5 -15   0 1309.87   55.39 
   5  15   0 1264.27   38.60 
  -5  15   0 1260.97   47.90 
   5  15   0 1289.37   51.49 
   5  15   0 1107.59   38.40 
  -6 -15   0  326.27   24.70 
   6 -15   0  283.27   20.40 
   6  15   0  258.07   12.20 
   6  15   0  324.07   22.50 
   6  15   0  314.87   13.10 
  -6  15   0  341.07   20.80 
   7 -15   0  309.77   21.60 
  -7 -15   0  249.18   22.20 
  -7  15   0  304.57   20.00 
   7  15   0  264.17   11.50 
   8 -15   0  904.01   42.70 
  -8 -15   0  889.01   47.00 
  -8  15   0  903.91   40.30 
   8  15   0  823.32   27.20 
   8  15   0  931.11   27.80 
  -9 -15   0  145.89   17.50 
   9 -15   0  208.78   18.80 
  -9  15   0  163.98   15.60 
   9  15   0  174.38    7.90 
   9  15   0  156.68    7.30 
 -10 -15   0  354.46   29.50 
  10 -15   0  380.66   27.60 
 -10  15   0  351.56   24.70 
  10  15   0  378.06   12.40 
 -11 -15   0  449.95   35.10 
  11 -15   0  430.76   30.90 
 -11  15   0  461.65   29.30 
  12 -15   0   58.09   12.90 
 -12 -15   0   53.49   14.10 
 -12  15   0   62.69   12.80 
  13 -15   0   12.80    6.80 
 -13 -15   0   -5.60    8.50 
 -13  15   0    0.90    5.30 
   0  16   0 3013.50   90.39 
   0  16   0 3061.49   95.99 
   1 -16   0 1199.58   45.90 
  -1 -16   0 1256.87   44.80 
   1  16   0 1210.58   41.10 
  -1  16   0 1254.97   48.10 
  -1  16   0 1178.68   42.70 
   1  16   0 1267.87   49.40 
  -2 -16   0   88.39    8.70 
   2 -16   0   94.39   10.10 
   2  16   0   75.89   10.20 
  -2  16   0  104.19   11.40 
   2  16   0   97.99    7.70 
  -2  16   0   85.59    9.90 
   3 -16   0  228.88   17.30 
  -3 -16   0  239.78   14.40 
  -3  16   0  262.37   17.70 
   3  16   0  265.47   19.30 
   3  16   0  232.38   12.60 
   4 -16   0  160.38   14.80 
  -4 -16   0  187.08   17.90 
  -4 -16   0  187.58   11.60 
   4  16   0  182.98   16.00 
  -4  16   0  195.48   15.10 
   4  16   0  175.88   10.30 
  -5 -16   0   22.30    4.00 
  -5 -16   0   30.30    8.80 
   5 -16   0   24.70    7.10 
   5  16   0   16.30    3.20 
   5  16   0   26.00    7.70 
   5  16   0   25.90    4.20 
  -5  16   0   31.00    7.00 
  -6 -16   0   80.89   14.00 
   6 -16   0   72.49   11.70 
  -6  16   0   66.79   10.70 
   6  16   0   80.09    6.00 
   6  16   0   65.09    5.30 
   6  16   0   90.39   11.90 
   7 -16   0    4.00    6.20 
   7  16   0    6.20    1.90 
  -7  16   0   11.20    7.50 
   8 -16   0   -5.50    3.30 
  -8 -16   0   11.40    4.50 
   8  16   0    4.20    1.70 
   8  16   0    5.70    1.90 
  -8  16   0    3.80    3.90 
   9 -16   0   66.49   12.20 
  -9 -16   0   64.19   13.70 
  -9  16   0   81.89   13.00 
   9  16   0   76.39    4.10 
  10 -16   0  242.88   22.50 
 -10 -16   0  244.88   24.90 
 -10  16   0  298.77   22.30 
 -11 -16   0  341.87   30.30 
  11 -16   0  359.86   28.70 
 -11  16   0  375.06   25.90 
 -12 -16   0  140.39   22.50 
  12 -16   0  105.19   17.60 
 -12  16   0  104.29   16.10 
   0 -17   0   -0.90    2.70 
   0  17   0   -4.10    2.60 
   0  17   0    4.40    3.80 
  -1 -17   0   61.99    8.50 
   1 -17   0   73.59    9.30 
  -1  17   0   74.59    9.40 
   1  17   0   80.89    9.90 
  -1  17   0   56.89    7.70 
  -2 -17   0   61.39    7.80 
   2 -17   0   78.69    9.70 
   2  17   0   52.59    9.70 
  -2  17   0   49.10    8.90 
   2  17   0   60.29    6.50 
   3 -17   0  164.48   14.70 
  -3 -17   0  162.78   12.00 
   3  17   0  151.78   14.60 
  -3  17   0  156.98   14.00 
   3  17   0  146.99   10.00 
  -4 -17   0    8.20    3.80 
   4 -17   0   13.70    5.60 
  -4 -17   0   18.10    7.30 
   4  17   0   23.10    3.80 
   4  17   0   24.40    6.60 
  -4  17   0   25.30    6.30 
  -5 -17   0   96.89    7.60 
   5 -17   0   94.29   12.10 
  -5 -17   0   93.29   15.60 
   5  17   0   95.89    7.30 
   5  17   0   90.29    7.50 
  -5  17   0  113.59   12.10 
   5  17   0   89.99   11.80 
  -6 -17   0  101.49   16.40 
   6 -17   0  117.29   13.10 
   6  17   0   92.19   12.30 
   6  17   0   92.89    6.70 
   6  17   0  111.89    7.20 
  -6  17   0   93.49   12.20 
  -7 -17   0   28.00    8.90 
   7 -17   0   11.00    4.70 
   7  17   0   21.80    3.20 
   7  17   0   22.80    3.80 
   7  17   0   13.70    6.20 
  -7  17   0   10.30    5.00 
   8 -17   0   73.49   12.40 
  -8 -17   0   58.89   12.80 
   8  17   0   71.89    4.50 
  -8  17   0   43.30    9.30 
   8  17   0   56.59   11.70 
   8  17   0   60.29    4.50 
   9 -17   0   -8.60    3.30 
  -9 -17   0   -2.30    3.10 
   9  17   0    5.90    4.50 
 -10 -17   0   14.80    8.60 
  10 -17   0    7.00    6.50 
 -10  17   0   19.50    6.70 
  11 -17   0   41.10   10.50 
 -11 -17   0   19.80   10.20 
 -11  17   0   56.09   11.40 
  12 -17   0   34.70    9.40 
 -12 -17   0   14.90    9.20 
 -12  17   0   18.90    8.20 
   0 -18   0 1075.59   42.90 
   0  18   0 1026.50   38.50 
   0  18   0 1048.90   44.80 
  -1 -18   0  142.39   12.60 
   1 -18   0  147.79   13.40 
   1  18   0  144.39   10.90 
   1  18   0  165.38   14.70 
  -1  18   0  141.99   13.90 
  -2 -18   0    4.20    3.80 
   2 -18   0    9.90    5.00 
  -2  18   0   11.70    4.50 
   2  18   0    9.30    4.40 
   2  18   0   10.70    3.50 
   3 -18   0  122.39   12.50 
  -3 -18   0  100.29    9.60 
   3  18   0  102.69    8.40 
  -3  18   0  102.09   11.80 
   3  18   0  100.09   12.20 
   4 -18   0  428.76   26.50 
  -4 -18   0  410.56   20.40 
  -4  18   0  454.65   26.00 
   4  18   0  448.96   19.00 
   4  18   0  434.06   27.50 
  -5 -18   0  162.58   10.90 
  -5 -18   0  207.78   20.30 
   5 -18   0  178.88   16.70 
   5  18   0  152.18   10.40 
  -5  18   0  191.98   17.50 
   5  18   0  172.68   10.20 
   5  18   0  188.58   17.70 
  -6 -18   0   -4.90    4.40 
   6 -18   0    5.00    4.40 
   6  18   0   -0.20    1.80 
   6  18   0    0.70    1.90 
   6  18   0   -2.50    3.20 
  -6  18   0   -0.10    2.60 
   7 -18   0   16.10    6.80 
  -7 -18   0   15.60    7.50 
   7  18   0   21.50    3.20 
   7  18   0   24.20    3.50 
  -7  18   0   12.30    5.60 
   7  18   0   19.40    7.40 
  -8 -18   0   29.70    9.10 
   8 -18   0    9.40    5.90 
   8  18   0   17.30    6.30 
   8  18   0   23.50    2.80 
  -8  18   0   23.70    7.10 
   8  18   0   17.40    3.30 
   9 -18   0    4.70    4.70 
  -9 -18   0    0.60    4.30 
   9  18   0   -1.50    3.40 
  -9  18   0    2.70    4.10 
 -10 -18   0  229.28   25.00 
  10 -18   0  231.68   22.40 
  10  18   0  227.18   22.90 
 -10  18   0  198.58   19.10 
 -11 -18   0   97.39   18.90 
  11 -18   0   84.59   15.60 
 -11  18   0   98.89   16.70 
  12 -18   0   17.20    6.90 
 -12 -18   0   12.00    9.00 
 -12  18   0    6.60    6.50 
   0 -19   0    1.50    3.40 
   0  19   0   -3.90    2.50 
  -1 -19   0  446.06   24.30 
   1 -19   0  428.46   25.40 
   1  19   0  417.86   20.70 
  -1  19   0  439.66   26.40 
   1  19   0  427.26   26.70 
   2 -19   0    3.20    3.70 
  -2 -19   0   -1.60    3.10 
  -2  19   0    0.70    2.90 
   2  19   0    4.60    2.80 
   2  19   0    0.20    3.50 
   3 -19   0  162.08   15.60 
  -3 -19   0  156.28   12.50 
   3  19   0  166.38   16.20 
   3  19   0  162.98   11.10 
  -3  19   0  146.69   14.70 
  -4 -19   0  546.95   24.90 
   4 -19   0  568.14   31.90 
   4  19   0  572.44   22.90 
  -5 -19   0 1449.76   46.00 
  -5 -19   0 1402.06   63.19 
   5 -19   0 1343.57   60.89 
  -5  19   0 1380.86   55.29 
   5  19   0 1485.85   60.29 
   5  19   0 1418.36   43.80 
   5  19   0 1225.78   44.40 
   6 -19   0 1773.82   68.69 
  -6 -19   0 1630.94   72.59 
   6  19   0 1703.13   50.89 
   6  19   0 1788.02   70.49 
  -6  19   0 1689.53   64.69 
   7 -19   0  274.77   22.80 
  -7 -19   0  281.97   25.10 
  -7  19   0  252.67   20.10 
   7  19   0  297.37   24.80 
   7  19   0  235.58   11.10 
   7  19   0  263.17   11.30 
  -8 -19   0   39.30   10.60 
   8 -19   0   18.60    6.50 
   8  19   0   14.90    6.80 
  -8  19   0   14.40    6.00 
   8  19   0   14.80    2.20 
   9 -19   0  373.56   28.90 
  -9 -19   0  432.56   33.80 
  -9  19   0  399.46   27.10 
   9  19   0  453.15   32.40 
  10 -19   0  778.02   45.30 
 -10 -19   0  811.62   50.29 
  10  19   0  831.42   47.40 
 -10  19   0  768.52   41.30 
 -11 -19   0   59.79   14.80 
  11 -19   0   71.29   14.10 
 -11  19   0   46.20   10.70 
  11  19   0   83.19   15.40 
   0 -20   0 1769.32   63.99 
   0  20   0 1772.32   67.19 
  -1 -20   0 1833.52   64.09 
   1 -20   0 1875.41   66.69 
   1  20   0 1615.44   64.59 
   1  20   0 1871.21   69.99 
  -1  20   0 1808.82   68.39 
   2 -20   0  519.75   29.80 
  -2 -20   0  542.65   27.10 
   2  20   0  552.94   24.10 
   3 -20   0   68.39   11.30 
  -3  20   0   72.99   12.30 
   3  20   0   98.39   12.40 
   3  20   0   94.89    9.90 
  -4 -20   0  384.96   20.40 
   4 -20   0  391.56   26.20 
   4  20   0  396.86   18.60 
  -4  20   0  426.16   26.20 
   4  20   0  432.26   28.80 
  -5 -20   0  412.46   19.80 
   5 -20   0  408.66   27.80 
  -5  20   0  448.66   27.50 
   5  20   0  409.46   28.70 
   5  20   0  414.46   19.70 
   5  20   0  421.56   18.40 
   6 -20   0   63.09   12.50 
  -6 -20   0   57.59   14.00 
   6  20   0   64.19    6.20 
  -6  20   0   47.30    9.80 
   6  20   0   66.49   12.80 
   6  20   0   54.49    6.20 
   7 -20   0   32.20    9.10 
  -7 -20   0    7.20    7.40 
   7  20   0   30.00    3.90 
  -7  20   0   19.30    6.90 
   7  20   0   31.20    4.10 
   7  20   0   27.70    9.50 
   8 -20   0   43.10   11.10 
  -8 -20   0   70.19   15.30 
  -8  20   0   45.20   10.80 
   8  20   0   36.10   10.90 
   9 -20   0  245.88   23.50 
  -9 -20   0  210.38   24.50 
  -9  20   0  257.97   21.30 
   9  20   0  236.48   24.00 
  10 -20   0  670.03   42.10 
 -10 -20   0  578.84   42.90 
 -10  20   0  683.53   38.10 
  10  20   0  606.64   40.90 
  11 -20   0  326.97   29.00 
 -11 -20   0  337.67   32.10 
 -11  20   0  313.67   25.70 
  11  20   0  301.57   28.60 
   0 -21   0    2.70    3.90 
   0  21   0   -2.20    4.20 
   1 -21   0    5.70    4.40 
  -1 -21   0   -3.00    3.00 
  -1  21   0    0.30    4.00 
   1  21   0    7.80    4.30 
  -2 -21   0  106.69   11.40 
   2 -21   0  112.79   12.40 
  -2  21   0  119.79   13.60 
   2  21   0  126.89   14.20 
   2  21   0  107.99    9.60 
   3 -21   0  295.97   22.50 
  -3 -21   0  285.67   18.70 
  -3  21   0  312.87   22.60 
   3  21   0  315.07   16.80 
   3  21   0  292.37   23.50 
  -4 -21   0  955.60   37.70 
   4 -21   0 1038.20   47.30 
   4  21   0  944.91   47.20 
  -4  21   0  957.30   44.70 
   4  21   0  958.10   35.40 
  -5 -21   0 1324.37   44.90 
   5 -21   0 1275.17   56.59 
   5  21   0 1314.27   58.69 
   5  21   0 1303.57   44.60 
   5  21   0 1270.67   42.20 
  -5  21   0 1298.67   54.69 
   6 -21   0 1383.66   61.19 
  -6 -21   0 1376.66   66.29 
   6  21   0 1381.66   43.50 
  -6  21   0 1430.06   58.39 
   6  21   0 1425.26   62.89 
  -7 -21   0  705.73   44.70 
   7 -21   0  708.93   41.40 
   7  21   0  712.53   27.80 
   7  21   0  748.23   24.50 
  -7  21   0  716.63   38.20 
   7  21   0  766.12   43.40 
  -8 -21   0  146.99   19.20 
   8 -21   0  134.19   17.80 
   8  21   0  113.99   19.00 
  -8  21   0  111.89   14.10 
   9 -21   0  572.34   55.09 
  10 -21   0  612.84   40.80 
 -10 -21   0  627.44   45.00 
  10  21   0  593.14   41.20 
 -10  21   0  599.24   36.80 
   0 -22   0  643.64   33.30 
   0  22   0  633.14   36.00 
  -1 -22   0  415.56   24.90 
   1 -22   0  403.06   25.90 
  -1  22   0  402.06   27.30 
   1  22   0  387.76   27.10 
  -2 -22   0  429.86   24.70 
   2 -22   0  369.26   26.20 
   2  22   0  430.76   28.60 
  -2  22   0  417.16   27.50 
  -3 -22   0  238.48   17.40 
   3  22   0  249.68   21.70 
  -3  22   0  262.37   20.80 
   3  22   0  252.57   15.30 
  -4 -22   0  206.68   17.50 
   4 -22   0  188.78   19.20 
   4  22   0  204.98   13.30 
  -4  22   0  193.48   18.00 
   4  22   0  221.98   20.70 
  -5 -22   0  140.29   11.50 
   5 -22   0  137.29   17.10 
   5  22   0  116.59   18.20 
  -5  22   0  136.79   15.80 
   5  22   0  144.49   10.40 
   5  22   0  144.69   11.30 
   6 -22   0    8.90    6.40 
  -6  22   0    7.50    5.90 
   6  22   0    4.50    6.20 
   6  22   0    6.20    2.90 
  -7 -22   0   17.60    9.20 
   7 -22   0   16.10    7.90 
   7  22   0   19.40    8.60 
   7  22   0   26.10    3.50 
  -7  22   0   20.30    7.10 
  -8 -22   0   61.39   14.90 
   8 -22   0   71.09   14.50 
  -8  22   0   43.60   10.60 
   8  22   0   35.40   10.00 
  -9 -22   0  398.26   35.20 
   9 -22   0  377.96   31.50 
   9  22   0  399.56   32.50 
  -9  22   0  397.96   28.80 
   0 -23   0    3.70    4.30 
   0  23   0    7.30    6.00 
  -1 -23   0   19.70    6.50 
   1 -23   0   19.20    7.00 
   1  23   0   29.30    8.60 
  -1  23   0   23.50    6.90 
   2 -23   0   -5.00    3.30 
  -2 -23   0   -2.50    4.40 
   2  23   0    5.20    4.20 
  -2  23   0   11.20    5.50 
   3 -23   0  147.49   15.80 
  -3 -23   0  153.08   13.80 
   3  23   0  154.08   17.30 
  -3  23   0  129.59   15.20 
   4 -23   0  205.48   19.40 
  -4 -23   0  220.88   15.70 
  -4  23   0  200.48   18.70 
   4  23   0  187.08   20.40 
   4  23   0  192.28   13.10 
   5 -23   0  233.08   22.10 
  -5 -23   0  253.37   15.80 
  -5  23   0  302.17   23.10 
   5  23   0  251.57   18.30 
   5  23   0  274.77   24.10 
   6 -23   0  268.97   25.10 
   6  23   0  274.47   24.80 
   6  23   0  272.77   14.40 
  -6  23   0  242.38   21.80 
   7 -23   0  113.29   15.00 
  -7  23   0   73.29   13.60 
   7  23   0   60.59   14.10 
  -8 -23   0   23.00   10.60 
   8 -23   0   30.90   10.20 
   8  23   0   42.00   11.30 
  -8  23   0   58.29   12.00 
  -9 -23   0   23.10    9.50 
   9 -23   0    3.60    7.10 
   9  23   0    5.20    7.40 
  -9  23   0   10.00    7.30 
   0 -24   0  460.75   28.90 
   0  24   0  443.26   30.20 
  -1 -24   0   87.39   13.30 
   1 -24   0   69.39   12.10 
  -1  24   0  114.99   14.90 
   1  24   0   70.89   13.50 
  -2 -24   0   18.70    6.60 
  -2  24   0   26.30    8.30 
   2  24   0   24.10    7.80 
  -3 -24   0   12.40    5.20 
   3 -24   0   17.10    6.80 
   3  24   0    4.80    5.80 
  -3  24   0    1.60    5.30 
   4 -24   0   52.19   10.40 
  -4 -24   0   42.40    8.60 
   4  24   0   86.29   15.60 
  -4  24   0   61.19   11.70 
   5 -24   0   -2.50    5.80 
   5  24   0    3.80    4.10 
   5  24   0    8.50    7.70 
  -5  24   0    8.10    5.40 
   6 -24   0   42.30   10.70 
   6  24   0   31.80   10.80 
  -6  24   0   52.69   12.30 
  -7  24   0    7.50    6.70 
   7  24   0    4.10    7.50 
   8 -24   0    4.00    5.60 
  -8  24   0    1.30    6.60 
   8  24   0   -2.20    7.80 
   0 -25   0    6.10    5.20 
   0  25   0    6.30    6.30 
  -1 -25   0    9.30    5.90 
   1 -25   0   -5.40    5.10 
   1  25   0   -1.10    6.00 
  -1  25   0   -3.40    3.90 
   2 -25   0   -1.80    4.30 
   2  25   0    5.00    5.80 
  -2  25   0   -1.80    5.10 
  -3 -25   0    4.40    5.20 
   3 -25   0    6.00    5.70 
  -3  25   0   -5.60    3.90 
   3  25   0    2.80    4.90 
   4 -25   0   56.89   12.50 
  -4 -25   0   47.30    8.10 
  -4  25   0   36.20    9.50 
   4  25   0   56.19   11.30 
   5 -25   0  462.85   33.80 
  -5 -25   0  461.95   23.10 
   5  25   0  441.36   22.60 
   5  25   0  473.45   52.79 
   6 -25   0  271.67   26.70 
  -6  25   0  260.57   23.90 
   6  25   0  252.27   25.10 
   7 -25   0   40.60   11.50 
   7  25   0   20.50    9.50 
  -7  25   0   27.90    9.40 
   0 -26   0 1697.73   69.29 
   0  26   0 1819.72   74.59 
  -1 -26   0  651.53   35.90 
   1 -26   0  655.13   37.70 
   1  26   0  686.43   40.30 
  -1  26   0  616.14   38.10 
  -2 -26   0   29.00    8.10 
   2 -26   0   39.10    9.60 
  -2  26   0   23.70    8.80 
   2  26   0   33.10    9.80 
   3 -26   0   97.59   15.60 
  -3 -26   0  123.69   13.10 
  -3  26   0  106.49   27.60 
   4 -26   0  279.37   24.90 
  -4 -26   0  243.08   17.80 
   4  26   0  236.78   17.20 
  -4  26   0  205.08   20.80 
   4  26   0  228.38   22.70 
  -5 -26   0  190.58   15.00 
   5 -26   0  178.48   20.90 
   5  26   0  206.28   23.50 
  -5  26   0  210.08   21.10 
   6 -26   0    6.00    6.30 
  -6  26   0    4.60    5.50 
   6  26   0    6.30    5.80 
   0 -27   0   11.60    7.50 
   0  27   0    6.50    5.90 
   1 -27   0    6.90    8.90 
  -1 -27   0    4.20    6.90 
   2 -27   0   65.59   12.60 
  -2  27   0   40.50   10.50 
   2  27   0   52.49   11.40 
   3 -27   0  110.09   18.00 
  -3 -27   0  109.19   13.40 
  -3  27   0  111.19   17.20 
   3  27   0  105.99   17.20 
   4 -27   0  625.64   41.00 
  -4 -27   0  676.13   32.70 
  -4  27   0  753.82   42.00 
   4  27   0  684.23   43.20 
   0 -28   0  460.95   31.10 
   0  28   0  511.55   35.40 
  -1 -28   0  541.85   32.90 
   1 -28   0  568.04   36.40 
   1  28   0  523.55   36.80 
  -1  28   0  577.74   37.70 
  -2 -28   0  195.08   19.70 
   2 -28   0  225.48   23.50 
   2  28   0  199.58   22.80 
  -2  28   0  242.28   23.60 
 -16   0   1   -7.40    4.70 
  16   0  -1   -0.20    5.30 
  15   0  -1   -8.00    3.60 
 -14   0   1   -5.20    4.40 
  14   0  -1    1.10    3.80 
 -13   0   1   -9.10    3.50 
  13   0  -1   -0.90    3.00 
  12   0  -1    2.20    3.10 
 -12   0   1   -2.70    3.70 
  11   0  -1   -0.60    2.80 
 -11   0   1   -0.70    3.50 
 -10   0   1    4.70    3.40 
  10   0  -1   -1.70    2.60 
 -10   0   1    2.70    3.50 
   9   0  -1    1.70    2.10 
  -9   0   1   -1.00    2.60 
  -9   0   1   -1.60    2.60 
   8   0  -1    2.60    2.30 
  -8   0   1    6.50    3.60 
   8   0  -1   -0.40    1.70 
   7   0  -1    1.50    1.50 
  -7   0   1   -3.80    1.70 
  -7   0   1   -2.80    1.60 
   7   0  -1   -0.80    1.60 
  -6   0   1    2.50    2.00 
   6   0  -1    7.90    2.20 
   6   0  -1    0.80    1.50 
  -6   0   1    1.70    1.80 
  -5   0   1    0.40    1.30 
   5   0  -1    2.50    1.40 
  -5   0   1   -0.70    1.30 
   5   0  -1    4.40    1.70 
   4   0  -1    3.00    1.30 
   4   0  -1    0.90    0.90 
  -4   0   1   -0.10    1.10 
  -4   0   1   -0.20    0.80 
  -3   0   1   -0.30    0.80 
   3   0  -1    1.10    0.80 
  -3   0   1    1.00    1.10 
   3   0  -1    0.70    0.90 
   2   0  -1    0.50    0.50 
  -2   0   1   -0.30    0.40 
   2   0  -1   -0.50    0.50 
  -1   0   1    0.40    0.20 
   1   0  -1    0.20    0.10 
  -1   0  -1   -0.30    0.30 
   1   0   1   -0.70    0.50 
  -1   0  -1   -0.10    0.50 
  -2   0  -1    0.50    0.70 
   2   0   1    0.50    0.60 
  -2   0  -1    0.40    0.90 
   2   0   1    4.10    1.50 
   3   0   1    1.70    1.10 
  -3   0  -1    0.60    0.80 
  -3   0  -1    1.00    1.80 
   3   0   1   -0.50    1.70 
   4   0   1    1.30    1.20 
   4   0   1    0.70    1.70 
  -4   0  -1    1.70    1.40 
  -4   0  -1    2.50    1.80 
   5   0   1    3.40    2.30 
  -5   0  -1    1.20    1.70 
   5   0   1    4.00    1.90 
  -5   0  -1   -1.80    0.90 
  -6   0  -1    1.80    1.50 
  -6   0  -1    3.60    2.70 
   6   0   1    2.90    2.50 
   6   0   1    2.10    1.60 
  -7   0  -1   -3.10    2.40 
   7   0   1   -0.50    1.80 
  -7   0  -1    2.30    2.30 
   7   0   1   -2.20    1.40 
  -8   0  -1    1.50    1.80 
  -8   0  -1   -2.70    2.20 
   9   0   1    5.80    3.40 
  -9   0  -1    0.40    3.00 
  -9   0  -1   -5.30    2.80 
  10   0   1   -4.30    3.40 
 -10   0  -1    0.30    4.00 
  11   0   1    3.00    3.70 
 -11   0  -1    6.20    4.60 
  12   0   1    0.30    2.50 
 -12   0  -1    3.90    4.20 
 -13   0  -1   12.30    5.70 
  13   0   1   -1.50    3.30 
  14   0   1    7.40    4.70 
 -14   0  -1   -7.30    4.80 
  15   0   1   -8.90    5.10 
 -15   0  -1    4.60    7.10 
 -16  -1   1  106.49   18.70 
 -16   1   1   81.79   17.10 
  15  -1  -1  146.69   16.00 
  14  -1  -1    4.40    4.60 
 -14  -1   1    3.50    5.30 
 -14   1   1    2.60    4.00 
  14   1  -1    9.90    4.40 
 -13  -1   1   -4.50    4.00 
  13  -1  -1    3.40    3.30 
  13   1  -1    6.40    3.30 
  12  -1  -1  355.26   21.50 
 -12  -1   1  352.76   24.70 
 -12   1   1  378.36   25.30 
  12   1  -1  354.86   20.40 
 -11  -1   1  241.78   19.10 
 -11  -1   1  219.88   15.40 
  11  -1  -1  187.98   14.70 
 -11   1   1  233.48   18.60 
  11   1  -1  213.58   14.90 
 -10  -1   1   34.30    8.10 
  10  -1  -1   36.10    6.50 
 -10  -1   1   31.30    6.30 
 -10   1   1   30.00    7.20 
  10   1  -1   29.30    5.90 
 -10   1   1   39.40    8.40 
  -9  -1   1   31.30    6.80 
  -9  -1   1   30.40    5.50 
   9  -1  -1   37.70    7.90 
  -9   1   1   38.00    7.30 
   9   1  -1   28.40    5.30 
  -9   1   1   24.60    5.60 
   8  -1  -1  694.93   28.90 
  -8  -1   1  677.03   30.20 
  -8  -1   1  663.03   26.40 
   8  -1  -1  697.33   27.40 
  -8   1   1  703.93   30.00 
   8   1  -1  681.03   28.80 
   8   1  -1  741.83   26.70 
  -8   1   1  701.03   27.90 
   7  -1  -1   15.80    4.20 
  -7  -1   1   12.00    3.30 
   7  -1  -1    8.80    2.90 
  -7   1   1    8.70    3.40 
   7   1  -1    8.40    3.80 
   7   1  -1    9.10    2.40 
  -6  -1   1  765.42   29.40 
   6  -1  -1  779.72   29.00 
   6  -1  -1  780.02   27.30 
  -6  -1   1  751.62   26.30 
  -6   1   1  795.72   27.70 
  -6   1   1  778.92   29.10 
   6   1  -1  747.03   28.30 
   6   1  -1  785.62   26.00 
   5  -1  -1  365.86   15.00 
  -5  -1   1  359.96   16.70 
   5  -1  -1  367.06   15.90 
  -5  -1   1  349.07   14.60 
  -5   1   1  360.96   16.10 
  -5   1   1  362.06   15.00 
   5   1  -1  373.36   13.90 
   5   1  -1  351.86   15.80 
  -4  -1   1  611.94   22.10 
  -4  -1   1  622.54   19.80 
   4  -1  -1  634.94   20.90 
   4  -1  -1  584.94   21.40 
  -4   1   1  607.14   20.80 
  -4   1   1  617.34   21.80 
   4   1  -1  642.34   19.60 
   4   1  -1  613.84   21.70 
   3  -1  -1 1027.30   29.10 
  -3  -1   1  958.20   29.70 
   3  -1  -1  942.81   29.40 
  -3  -1   1  976.80   27.30 
   3   1  -1  910.41   29.50 
   3   1  -1  995.20   27.40 
  -3   1   1  974.50   28.50 
  -3   1   1  963.20   29.40 
   2  -1  -1 1796.32   53.39 
   2  -1  -1 2098.69   53.39 
  -2  -1   1 1897.21   53.69 
  -2  -1   1 2013.40   51.29 
   2   1  -1 2009.90   53.49 
   2   1  -1 1941.11   51.49 
  -2   1   1 2009.10   52.99 
  -1  -1  -1 2233.28   57.89 
   1  -1   1 1947.81   58.89 
  -1  -1  -1 2246.18   57.89 
  -1   1  -1 2253.57   58.49 
  -2  -1  -1 1770.12   48.90 
  -2  -1  -1 1790.82   49.60 
   2  -1   1 1787.52   49.00 
   2  -1   1 1776.02   49.99 
   2   1   1 1745.63   49.10 
  -2   1  -1 1742.23   49.00 
   2   1   1 1839.02   49.20 
  -2   1  -1 1774.42   49.90 
  -3  -1  -1  327.67   13.30 
  -3  -1  -1  313.17   12.50 
   3  -1   1  312.47   12.60 
   3  -1   1  309.67   13.30 
   3   1   1  332.77   12.90 
  -3   1  -1  320.47   12.90 
   3   1   1  302.87   12.60 
  -3   1  -1  318.27   13.40 
   4  -1   1  649.74   23.30 
   4  -1   1  674.13   24.00 
  -4  -1  -1  652.13   22.90 
  -4  -1  -1  687.23   24.40 
   4   1   1  697.63   23.60 
   4   1   1  685.33   23.80 
  -4   1  -1  660.53   23.80 
  -4   1  -1  655.13   23.90 
   5  -1   1  921.21   31.40 
  -5  -1  -1  875.91   31.80 
   5  -1   1  900.21   31.00 
  -5  -1  -1  876.21   30.10 
   5   1   1  892.41   31.10 
  -5   1  -1  944.31   32.20 
   5   1   1  902.11   30.60 
  -5   1  -1  889.21   31.40 
  -6  -1  -1   15.10    3.90 
   6  -1   1   15.40    3.70 
  -6  -1  -1   14.00    3.40 
   6  -1   1   18.10    4.10 
  -6   1  -1   13.30    3.70 
   6   1   1   10.70    3.50 
   6   1   1   10.40    3.10 
  -6   1  -1   16.10    3.90 
  -7  -1  -1    3.10    2.80 
   7  -1   1    4.50    2.80 
  -7  -1  -1    2.40    2.40 
   7  -1   1    3.60    2.20 
  -7   1  -1    4.70    2.60 
   7   1   1    1.50    1.90 
  -7   1  -1    5.50    3.40 
   7   1   1   -0.60    2.20 
  -8  -1  -1    1.20    2.50 
  -8  -1  -1   10.90    3.70 
   8  -1   1    2.70    3.40 
   8   1   1    4.80    3.20 
  -8   1  -1    5.00    3.20 
  -8   1  -1   12.40    4.40 
  -9  -1  -1 1310.57   46.10 
  -9  -1  -1 1311.77   50.29 
   9  -1   1 1301.17   46.40 
  -9   1  -1 1365.76   50.09 
  -9   1  -1 1235.48   46.90 
   9   1   1 1316.87   45.80 
  10  -1   1 1720.53   58.19 
 -10  -1  -1 1687.73   62.79 
 -10   1  -1 1636.14   61.29 
  10   1   1 1660.73   56.79 
  11  -1   1  312.47   19.60 
 -11  -1  -1  303.87   26.70 
 -11   1  -1  301.57   27.10 
  11   1   1  290.37   18.40 
  12  -1   1   17.30    6.10 
 -12  -1  -1   14.70    6.90 
  12   1   1   16.90    5.20 
 -12   1  -1   18.40    7.00 
 -13  -1  -1   20.30    7.20 
 -13   1  -1   13.10    6.00 
  13   1   1   18.50    6.30 
  14  -1   1  141.59   15.40 
 -14  -1  -1  190.88   19.90 
 -14   1  -1  170.68   19.40 
  14   1   1  176.38   15.40 
  15  -1   1  320.27   24.00 
 -15  -1  -1  357.46   29.40 
  15   1   1  297.27   22.70 
 -15   1  -1  318.17   27.90 
  15  -2  -1  417.46   27.00 
  15   2  -1  409.96   24.90 
 -15   2   1  330.07   35.80 
  14  -2  -1   16.00    5.40 
 -14  -2   1    4.90    6.30 
  14   2  -1    9.00    4.50 
 -14   2   1    2.30    4.80 
 -13  -2   1    4.40    3.70 
  13  -2  -1    4.20    3.80 
  13   2  -1   -0.80    3.10 
 -13   2   1    6.10    5.20 
  12  -2  -1   52.29    9.10 
 -12  -2   1   51.39   10.90 
 -12   2   1   47.10    9.40 
  12   2  -1   53.89    8.50 
 -11  -2   1 1390.16   48.20 
  11  -2  -1 1287.57   49.90 
 -11  -2   1 1510.05   58.29 
 -11   2   1 1371.56   54.49 
  11   2  -1 1381.96   48.20 
  10  -2  -1 2979.20   90.39 
 -10  -2   1 2953.00   95.49 
 -10  -2   1 2964.70   89.19 
 -10   2   1 2709.23   98.79 
 -10   2   1 3108.29   94.99 
  10   2  -1 2964.70   87.29 
  -9  -2   1  682.13   27.40 
   9  -2  -1  706.53   29.30 
  -9  -2   1  697.63   32.40 
   9   2  -1  750.82   27.70 
  -9   2   1  704.83   29.90 
  -9   2   1  670.63   31.00 
  -8  -2   1  298.67   18.00 
   8  -2  -1  260.17   15.00 
  -8  -2   1  249.78   13.60 
   8  -2  -1  276.87   15.90 
   8   2  -1  257.57   13.30 
  -8   2   1  242.08   15.20 
  -8   2   1  282.97   16.90 
   8   2  -1  260.37   15.70 
  -7  -2   1  865.51   29.70 
   7  -2  -1  844.22   32.30 
   7  -2  -1  897.41   31.80 
   7   2  -1  894.81   33.00 
  -7   2   1  856.61   31.80 
   7   2  -1  867.31   29.10 
  -6  -2   1 4151.68  117.29 
   6  -2  -1 4252.77  114.69 
  -6  -2   1 4090.29  111.89 
   6  -2  -1 4051.99  115.29 
   6   2  -1 4281.67  111.59 
  -6   2   1 4093.69  115.99 
  -6   2   1 4190.18  114.59 
   6   2  -1 4078.19  115.49 
   5  -2  -1 8448.95  221.08 
  -5  -2   1 8214.78  217.48 
  -5  -2   1 8585.84  222.78 
  -5   2   1 8331.57  221.28 
  -5   2   1 8275.57  219.88 
   5   2  -1 8432.26  221.38 
  -4  -2   1 3372.36   90.89 
  -4  -2   1 3155.88   85.69 
   4  -2  -1 3290.37   88.59 
   4  -2  -1 3352.96   89.49 
   4   2  -1 3162.68   89.19 
  -4   2   1 3236.88   89.09 
   4   2  -1 3143.49   85.49 
  -4   2   1 3198.08   87.99 
  -3  -2   1  342.57   13.70 
  -3  -2   1  336.97   10.60 
   3  -2  -1  352.86   13.20 
   3  -2  -1  337.27   13.40 
   3   2  -1  299.87   13.60 
  -3   2   1  332.27   12.90 
  -3   2   1  344.07   12.70 
   3   2  -1  340.57   10.50 
  -2  -2   1   16.80    2.10 
   2  -2  -1   17.40    1.90 
   2  -2  -1   13.80    1.80 
  -2   2   1   10.10    1.70 
   2   2  -1   14.60    0.90 
  -2   2   1   13.80    1.70 
   2   2  -1   15.40    2.00 
   1  -2  -1   42.30    2.60 
   1  -2  -1   35.00    2.80 
  -1   2   1   28.60    2.50 
   1   2  -1   40.60    2.90 
   0  -2   1 2196.78   57.19 
   0  -2  -1 2353.76   58.19 
   0  -2  -1 1937.21   57.79 
   1  -2   1  735.63   21.90 
  -1  -2  -1  734.03   22.00 
  -1  -2  -1  698.13   21.10 
   1  -2   1  709.53   20.90 
   1   2   1  687.13   21.30 
  -1   2  -1  709.13   21.80 
   1   2   1  713.23   21.00 
  -1   2  -1  712.63   20.90 
   1   2   1  700.73   21.50 
  -2  -2  -1   25.80    2.50 
   2  -2   1   29.60    2.80 
  -2  -2  -1   22.60    2.80 
  -2   2  -1   26.00    2.60 
   2   2   1   29.00    2.90 
   2   2   1   27.10    2.50 
  -2   2  -1   29.30    3.60 
   3  -2   1  403.26   15.30 
  -3  -2  -1  390.06   14.40 
   3  -2   1  405.96   16.00 
  -3  -2  -1  429.26   16.40 
   3   2   1  389.96   15.40 
   3   2   1  420.46   15.00 
  -3   2  -1  404.96   16.30 
  -3   2  -1  402.16   15.40 
   4  -2   1 1764.92   51.79 
  -4  -2  -1 1759.32   52.49 
   4  -2   1 1694.03   50.89 
  -4  -2  -1 1662.13   49.50 
   4   2   1 1696.53   51.19 
  -4   2  -1 1704.83   51.89 
  -4   2  -1 1756.72   51.49 
   4   2   1 1754.62   50.39 
   5  -2   1 4763.02  128.69 
  -5  -2  -1 4569.04  126.79 
  -5  -2  -1 4765.92  130.49 
   5  -2   1 4803.32  129.09 
   5   2   1 4861.41  127.79 
   5   2   1 4571.74  128.59 
  -5   2  -1 4688.73  129.09 
  -5   2  -1 4639.14  129.39 
  -6  -2  -1 1357.16   46.20 
  -6  -2  -1 1329.07   42.60 
   6  -2   1 1410.36   44.70 
   6  -2   1 1295.47   44.00 
   6   2   1 1365.56   43.30 
  -6   2  -1 1377.66   45.20 
   6   2   1 1305.07   44.30 
  -6   2  -1 1319.67   44.80 
   7  -2   1  903.31   33.60 
  -7  -2  -1  934.21   36.10 
  -7  -2  -1  881.31   32.00 
   7  -2   1  915.41   33.90 
   7   2   1  861.61   33.60 
   7   2   1  937.21   32.80 
  -7   2  -1  864.61   34.20 
  -7   2  -1  874.91   35.50 
  -8  -2  -1  797.02   31.00 
   8  -2   1  871.51   33.10 
  -8  -2  -1  801.32   35.00 
   8   2   1  817.52   31.40 
  -8   2  -1  876.21   35.40 
  -8   2  -1  778.92   33.20 
  -9  -2  -1  759.52   30.70 
  -9  -2  -1  787.92   35.40 
   9  -2   1  776.02   32.10 
  -9   2  -1  726.73   33.50 
   9   2   1  757.62   30.70 
 -10  -2  -1 1181.78   48.80 
 -10  -2  -1 1108.79   42.00 
  10  -2   1 1137.09   44.00 
  10   2   1 1131.99   42.00 
 -10   2  -1 1163.08   47.00 
  11  -2   1  475.75   25.50 
 -11  -2  -1  535.15   43.50 
  11   2   1  460.25   24.00 
 -11   2  -1  456.85   42.90 
 -12  -2  -1  217.98   19.20 
  12  -2   1  187.68   15.70 
 -12   2  -1  211.98   18.40 
  12   2   1  179.88   14.60 
  13  -2   1   -0.20    3.70 
 -13  -2  -1    4.40    4.50 
  13   2   1    5.20    3.50 
 -13   2  -1    1.40    3.40 
  14  -2   1   11.60    6.10 
 -14  -2  -1    3.10    6.90 
  14   2   1    9.30    6.00 
 -14   2  -1    0.50    6.10 
 -15  -2  -1   38.50   11.60 
  15  -2   1   12.80    6.80 
 -15   2  -1   35.70   10.80 
  15   2   1    5.80    6.20 
  15  -3  -1 1095.19   50.19 
 -15  -3   1 1067.29   59.99 
 -15   3   1 1054.19   57.29 
  15   3  -1 1168.68   46.60 
  14  -3  -1  374.06   24.30 
 -14  -3   1  340.37   27.30 
  14   3  -1  345.27   21.50 
 -14   3   1  379.26   27.60 
 -13  -3   1  239.58   21.60 
  13  -3  -1  226.08   18.30 
  13   3  -1  216.48   15.70 
 -13   3   1  250.77   20.70 
 -12  -3   1  917.11   45.00 
  12  -3  -1  966.60   41.20 
 -12  -3   1  954.40   36.80 
 -12   3   1  934.91   43.50 
  12   3  -1  977.80   37.60 
 -11  -3   1 2997.60   97.89 
 -11  -3   1 2774.92   86.09 
  11  -3  -1 2787.62   90.89 
  11   3  -1 2921.41   86.79 
 -11   3   1 3029.10   95.89 
 -10  -3   1 2170.98   67.69 
 -10  -3   1 2290.27   77.59 
  10  -3  -1 2222.38   72.19 
  10   3  -1 2230.08   67.99 
 -10   3   1 2211.48   74.89 
  -9  -3   1  671.33   31.80 
   9  -3  -1  656.03   28.40 
  -9  -3   1  674.13   25.80 
  -9   3   1  626.94   29.60 
   9   3  -1  678.33   25.50 
  -9   3   1  624.94   28.40 
   8  -3  -1  924.71   35.80 
  -8  -3   1  988.20   39.30 
  -8  -3   1  944.91   32.00 
   8   3  -1  907.11   35.80 
   8   3  -1  956.40   31.70 
  -8   3   1  894.81   36.60 
  -8   3   1  928.41   36.50 
  -7  -3   1  213.98   14.50 
  -7  -3   1  226.78   11.30 
   7  -3  -1  228.58   13.30 
   7  -3  -1  221.08   13.50 
  -7   3   1  219.78   13.80 
   7   3  -1  204.08   13.10 
  -7   3   1  219.58   13.20 
   7   3  -1  224.78   10.90 
  -6  -3   1  115.19    9.70 
   6  -3  -1  116.79    8.60 
  -6  -3   1  106.29    6.90 
   6  -3  -1  128.49    9.00 
   6   3  -1  116.39    8.80 
  -6   3   1  103.09    8.60 
   6   3  -1  116.69    6.70 
  -6   3   1  119.19    9.10 
   5  -3  -1  425.46   18.20 
   5  -3  -1  476.15   18.70 
  -5  -3   1  458.95   19.90 
  -5  -3   1  430.16   15.30 
  -5   3   1  444.36   18.70 
  -5   3   1  438.26   17.90 
   5   3  -1  449.56   15.10 
   5   3  -1  426.96   18.60 
  -4  -3   1  282.27    9.80 
   4  -3  -1  275.37   12.60 
  -4  -3   1  290.07   13.90 
   4  -3  -1  277.17   12.60 
  -4   3   1  263.27   12.10 
  -4   3   1  271.57   12.50 
   4   3  -1  282.77    9.50 
   4   3  -1  267.27   12.80 
  -3  -3   1 2884.31   80.99 
   3  -3  -1 2835.62   79.39 
   3  -3  -1 3023.60   80.19 
  -3  -3   1 2869.61   75.09 
   3   3  -1 2933.01   75.09 
   3   3  -1 2940.91   80.39 
  -3   3   1 2880.41   79.29 
  -3   3   1 2925.61   79.59 
   2  -3  -1   39.60    3.30 
   2  -3  -1   43.10    3.60 
  -2  -3   1   41.20    3.80 
  -2   3   1   39.60    3.40 
  -2   3   1   37.10    3.10 
   2   3  -1   41.50    3.70 
  -1  -3  -1 2519.85   71.99 
   1  -3   1 2769.42   72.69 
  -1  -3  -1 2760.92   73.69 
  -1   3  -1 2661.43   72.59 
  -1   3  -1 2690.53   71.99 
   1   3   1 2745.33   72.29 
   1   3   1 2615.34   71.99 
   1   3   1 2763.92   73.39 
  -2  -3  -1 5249.27  140.99 
  -2  -3  -1 5202.48  138.49 
   2   3   1 5471.85  139.09 
   3  -3   1 3609.04   98.49 
  -3  -3  -1 3687.63  100.39 
   3  -3   1 3641.24   99.39 
   3   3   1 3589.74   99.19 
  -3   3  -1 3636.14   98.59 
   3   3   1 3688.33   97.09 
  -3   3  -1 3619.44   99.79 
   5  -3   1 2138.19   63.29 
  -5  -3  -1 2098.59   64.79 
   5  -3   1 2068.29   62.69 
  -5  -3  -1 2125.59   60.69 
  -5   3  -1 2163.88   63.49 
   5   3   1 2184.88   61.49 
   5   3   1 2045.70   62.89 
  -5   3  -1 2074.29   63.89 
   6  -3   1  452.45   20.10 
   6  -3   1  430.36   19.60 
  -6  -3  -1  427.06   17.90 
  -6  -3  -1  423.06   21.10 
   6   3   1  451.45   18.80 
  -6   3  -1  416.16   20.30 
   6   3   1  440.96   19.90 
  -6   3  -1  422.06   19.90 
  -7  -3  -1  318.67   15.70 
  -7  -3  -1  334.67   19.30 
   7  -3   1  317.67   18.50 
   7  -3   1  321.67   17.40 
   7   3   1  334.07   17.80 
   7   3   1  347.27   16.70 
  -7   3  -1  349.87   18.80 
  -7   3  -1  335.67   18.10 
   8  -3   1   55.89    7.70 
  -8  -3  -1   65.29    8.60 
  -8  -3  -1   66.59    7.00 
  -8   3  -1   66.49    8.50 
   8   3   1   88.59    8.50 
  -8   3  -1   66.09    8.10 
  -9  -3  -1  625.74   31.60 
   9  -3   1  657.03   29.40 
  -9  -3  -1  629.14   26.90 
  -9   3  -1  685.53   31.30 
 -10  -3  -1 2602.74   86.79 
 -10  -3  -1 2425.56   77.59 
  10  -3   1 2559.74   81.29 
  10   3   1 2526.45   77.89 
 -10   3  -1 2534.75   83.99 
  11  -3   1  957.00   40.30 
 -11   3  -1  776.12   60.29 
  11   3   1 1008.10   38.10 
 -12  -3  -1  161.78   16.80 
  12  -3   1  105.99   12.00 
  12   3   1  125.79   11.80 
 -12   3  -1  163.38   16.20 
 -13  -3  -1  102.59   16.80 
  13  -3   1  101.69   11.50 
  13   3   1   94.79   10.50 
 -13   3  -1  104.49   13.50 
 -14  -3  -1 1181.68   58.49 
  14  -3   1 1200.68   51.09 
 -14   3  -1 1122.19   54.59 
  14   3   1 1121.79   46.70 
  15  -3   1 1427.36   60.69 
 -15  -3  -1 1390.86   68.09 
  15   3   1 1465.95   56.99 
  15  -4  -1  158.48   17.30 
 -15  -4   1  179.58   21.90 
  15   4  -1  181.88   15.20 
 -15   4   1  167.18   19.00 
  14  -4  -1   57.89   10.10 
 -14  -4   1   39.90    9.60 
 -14   4   1   88.29   14.70 
  14   4  -1   54.99    8.20 
  13  -4  -1   89.49   15.90 
 -13  -4   1   79.79   14.50 
  13   4  -1   81.49    9.60 
 -13   4   1  109.79   13.60 
 -12  -4   1   30.20    8.60 
  12  -4  -1   34.60    8.00 
 -12  -4   1   39.10    6.40 
 -12   4   1   20.00    7.20 
  12   4  -1   37.40    6.60 
 -11  -4   1  224.18   19.60 
  11  -4  -1  202.88   16.30 
  11   4  -1  237.48   14.50 
 -11   4   1  224.58   18.30 
 -10  -4   1  773.42   37.30 
 -10  -4   1  733.93   28.50 
  10  -4  -1  800.42   34.10 
  10   4  -1  687.33   28.00 
 -10   4   1  804.72   35.40 
  -9  -4   1  645.54   32.20 
  -9  -4   1  689.43   25.50 
   9  -4  -1  633.84   29.10 
  -9   4   1  690.73   31.00 
  -9   4   1  667.13   30.20 
   9   4  -1  713.63   25.70 
  -8  -4   1  632.24   23.50 
  -8  -4   1  625.24   30.10 
   8  -4  -1  686.43   28.30 
   8   4  -1  664.23   23.50 
  -8   4   1  646.24   28.20 
  -8   4   1  659.23   28.70 
   7  -4  -1 1854.41   59.39 
  -7  -4   1 1816.62   61.49 
   7  -4  -1 1864.01   58.59 
  -7  -4   1 1813.02   53.09 
  -7   4   1 1799.62   58.19 
   7   4  -1 1942.71   53.29 
  -7   4   1 1821.32   59.09 
   7   4  -1 1827.52   58.99 
   6  -4  -1 6543.54  177.78 
   6  -4  -1 6691.03  177.98 
  -6  -4   1 6733.03  181.78 
  -6  -4   1 6480.65  171.78 
  -6   4   1 6444.96  177.98 
   6   4  -1 6774.72  171.78 
   6   4  -1 6555.74  178.48 
  -6   4   1 6429.06  177.08 
  -5  -4   1 9384.56  245.28 
   5  -4  -1 9843.62  251.87 
  -5  -4   1 9722.53  254.07 
  -5   4   1 9313.17  250.27 
   5   4  -1 9455.85  251.87 
   4  -4  -1 4433.86  119.09 
  -4  -4   1 4309.97  112.79 
   4  -4  -1 4270.37  118.39 
  -4  -4   1 4304.77  120.69 
  -4   4   1 4313.17  118.09 
   4   4  -1 4548.45  120.29 
   4   4  -1 4269.67  112.79 
  -4   4   1 4507.95  119.09 
   3  -4  -1 3785.32  103.59 
   3  -4  -1 3840.02  104.29 
  -3  -4   1 3704.33   98.19 
  -3  -4   1 3928.91  105.99 
  -3   4   1 3875.31  103.59 
  -3   4   1 3905.91  103.69 
   3   4  -1 3860.51   98.19 
   3   4  -1 3790.92  104.99 
   2  -4  -1 3589.94   90.59 
  -2  -4   1 3301.17   91.09 
   2  -4  -1 3223.48   89.99 
   2   4  -1 3374.06   84.19 
  -2   4   1 3290.07   88.89 
   2   4  -1 3023.00   91.59 
   0   4   1 5355.16  141.89 
   1  -4   1  657.43   21.10 
   1  -4   1  619.04   20.50 
  -1  -4  -1  625.14   22.20 
  -1  -4  -1  608.44   20.40 
   1   4   1  663.93   22.30 
  -1   4  -1  631.14   20.90 
  -1   4  -1  668.13   20.90 
   1   4   1  661.43   20.70 
   2  -4   1  403.26   15.10 
  -2  -4  -1  404.66   16.60 
   2  -4   1  419.96   15.70 
  -2  -4  -1  396.76   14.20 
  -2   4  -1  389.66   14.80 
   2   4   1  385.86   15.70 
   2   4   1  386.76   14.30 
   2   4   1  390.06   13.80 
  -2   4  -1  402.76   15.90 
  -3  -4  -1 1011.20   33.70 
  -3  -4  -1  988.70   30.10 
   3  -4   1  983.40   31.60 
   3  -4   1  977.80   32.10 
   3   4   1  990.10   32.80 
  -3   4  -1  974.30   32.60 
   3   4   1  996.40   29.60 
  -3   4  -1 1015.90   31.80 
   4  -4   1 5453.25  147.89 
  -4  -4  -1 5457.75  150.28 
   4  -4   1 5561.34  148.59 
  -4   4  -1 5353.56  149.09 
   4   4   1 5579.64  145.49 
   4   4   1 5513.45  148.69 
  -4   4  -1 5587.54  148.09 
   5  -4   1 5864.61  156.98 
   5  -4   1 5641.04  156.18 
  -5  -4  -1 5629.24  153.28 
  -5  -4  -1 5901.81  159.68 
   5   4   1 5949.10  154.08 
   5   4   1 5690.63  156.88 
  -5   4  -1 5645.84  157.68 
  -5   4  -1 5892.11  156.98 
  -6  -4  -1 2474.15   76.29 
  -6  -4  -1 2385.46   69.59 
   6  -4   1 2335.97   72.69 
   6  -4   1 2459.95   73.29 
  -6   4  -1 2584.94   74.69 
   6   4   1 2346.17   72.89 
  -6   4  -1 2369.96   74.09 
   6   4   1 2482.25   70.49 
  -7  -4  -1 2515.95   78.99 
   7  -4   1 2455.15   75.29 
   7  -4   1 2488.65   75.39 
  -7  -4  -1 2422.46   71.69 
  -7   4  -1 2482.75   76.39 
   7   4   1 2494.55   72.49 
   7   4   1 2383.86   74.99 
  -7   4  -1 2409.36   76.29 
   8  -4   1 1274.57   45.70 
  -8  -4  -1 1358.46   50.49 
  -8  -4  -1 1217.48   42.10 
  -8   4  -1 1138.19   53.09 
  -8   4  -1 1292.07   46.80 
   8   4   1 1344.87   43.40 
   9  -4   1 2548.34   79.69 
  -9  -4  -1 2501.05   84.09 
  -9  -4  -1 2416.16   77.19 
   9   4   1 2510.35   75.79 
  -9   4  -1 2514.15   80.89 
 -10  -4  -1 3318.37   99.39 
  10  -4   1 3198.38  102.69 
 -10  -4  -1 3377.16  109.59 
 -10   4  -1 3426.46  106.29 
  10   4   1 3520.65   99.79 
  11  -4   1 1270.47   50.19 
 -11  -4  -1 1296.27   56.49 
 -11   4  -1 1254.07   52.69 
  11   4   1 1320.07   46.50 
 -12  -4  -1   30.10    8.60 
 -12   4  -1   25.10    7.60 
  12   4   1   23.90    5.80 
 -13  -4  -1   32.20    9.00 
  13  -4   1   34.50    8.30 
 -13   4  -1   42.20    9.50 
  13   4   1   37.40    7.30 
 -14  -4  -1    4.10    7.20 
  14  -4   1    2.00    4.90 
  14   4   1   -4.10    3.70 
 -14   4  -1   -1.00    5.50 
  15  -4   1  219.48   20.70 
 -15  -4  -1  248.48   25.40 
  15   4   1  228.88   17.80 
 -15   4  -1  247.08   24.30 
  15  -5  -1  477.15   31.00 
 -15  -5   1  439.96   34.30 
 -15   5   1  486.05   33.10 
  15   5  -1  446.96   25.00 
 -14  -5   1  295.47   26.60 
  14  -5  -1  282.17   22.40 
  14   5  -1  312.57   19.10 
 -14   5   1  297.97   24.00 
 -13  -5   1   46.90    7.40 
  13  -5  -1   41.20    9.10 
 -13  -5   1   50.09   10.90 
  13   5  -1   46.60    7.10 
 -13   5   1   33.50    9.10 
  12  -5  -1  473.85   27.30 
 -12  -5   1  458.95   21.90 
 -12  -5   1  458.45   30.50 
  12   5  -1  478.35   22.30 
 -12   5   1  472.65   28.30 
  11  -5  -1 1468.25   55.69 
 -11  -5   1 1481.65   48.50 
 -11  -5   1 1473.75   60.69 
 -11   5   1 1516.25   57.69 
  11   5  -1 1490.55   48.70 
  10  -5  -1 2186.18   71.99 
 -10  -5   1 2263.47   77.59 
 -10  -5   1 2192.08   64.29 
 -10   5   1 2224.68   73.49 
  10   5  -1 1870.41   63.09 
  -9  -5   1 1619.04   60.39 
   9  -5  -1 1610.44   56.29 
  -9  -5   1 1595.74   49.40 
   9   5  -1 1614.74   49.50 
  -9   5   1 1696.93   58.49 
  -8  -5   1    3.80    1.90 
   8  -5  -1    0.20    1.80 
  -8  -5   1    6.80    3.70 
   8   5  -1    8.20    2.20 
  -8   5   1    5.00    3.30 
  -8   5   1    6.50    3.10 
  -7  -5   1  511.75   25.20 
   7  -5  -1  432.76   26.40 
   7  -5  -1  498.15   22.70 
  -7  -5   1  489.05   17.60 
  -7   5   1  480.85   26.40 
   7   5  -1  484.05   22.80 
  -7   5   1  488.85   22.70 
   7   5  -1  516.25   17.70 
  -6  -5   1   11.90    2.20 
  -6  -5   1   19.60    5.10 
   6  -5  -1    9.00    3.30 
   6  -5  -1   15.00    3.80 
  -6   5   1   17.20    4.20 
   6   5  -1    9.20    3.20 
  -6   5   1   10.50    3.30 
  -5  -5   1  661.73   19.90 
  -5  -5   1  676.23   27.60 
   5  -5  -1  666.43   25.80 
   5  -5  -1  662.13   25.30 
  -5  -5   1  660.93   19.90 
  -5   5   1  666.93   25.40 
   5   5  -1  679.03   20.20 
  -5   5   1  654.73   24.80 
   5   5  -1  661.83   26.10 
   4  -5  -1  417.96   17.80 
   4  -5  -1  384.36   16.90 
  -4  -5   1  420.06   19.20 
  -4  -5   1  399.06   12.30 
  -4   5   1  424.26   17.20 
   4   5  -1  412.56   12.50 
   4   5  -1  411.96   18.10 
   4   5  -1  415.86   12.20 
  -4   5   1  414.96   17.20 
   3  -5  -1  272.97   12.50 
  -3  -5   1  275.37   14.10 
   3  -5  -1  277.07   13.00 
  -3   5   1  281.67   12.60 
  -3   5   1  275.57   12.50 
   3   5  -1  274.67   13.50 
   3   5  -1  283.47    7.90 
   3   5  -1  283.37    8.10 
   2  -5  -1 5727.93  153.18 
  -2  -5   1 5720.53  155.68 
  -2  -5   1 5835.92  148.59 
   2   5  -1 5899.71  155.48 
  -1  -5   1  698.93   20.70 
   1  -5  -1  723.03   23.90 
  -1  -5   1  660.63   25.80 
   1  -5  -1  707.43   26.00 
  -1  -5   1  714.33   25.10 
   1   5  -1  707.03   23.80 
  -1   5   1  712.03   23.20 
  -1   5   1  702.83   23.40 
   1   5  -1  746.33   20.70 
   0  -5   1  304.07   12.70 
   0  -5   1  321.37   11.50 
   0  -5  -1  314.87   12.90 
   0  -5  -1  329.17   13.00 
   0   5   1  316.57   12.90 
   0   5   1  317.97   14.00 
   0   5  -1  308.37   12.70 
   0   5  -1  309.27   11.60 
   0   5   1  306.27   12.30 
  -2  -5  -1 2337.67   66.19 
   2  -5   1 2406.26   67.99 
   2  -5   1 2444.56   67.89 
  -2  -5  -1 2458.25   70.49 
   2   5   1 2452.65   66.79 
   2   5   1 2438.06   66.09 
  -2   5  -1 2346.17   68.09 
   2   5   1 2441.36   69.69 
  -2   5  -1 2427.06   67.69 
  -3  -5  -1 1575.74   45.40 
   3  -5   1 1603.64   47.80 
  -3  -5  -1 1602.84   49.99 
   3  -5   1 1567.24   47.40 
   3   5   1 1554.84   44.60 
   3   5   1 1536.55   48.50 
  -3   5  -1 1578.54   47.20 
   3   5   1 1560.34   45.70 
  -3   5  -1 1576.04   48.30 
  -4  -5  -1 1150.18   36.80 
   4  -5   1 1185.28   38.60 
  -4  -5  -1 1201.58   41.20 
   4  -5   1 1199.58   39.10 
   4   5   1 1220.28   39.70 
   4   5   1 1223.58   35.80 
  -4   5  -1 1197.08   38.60 
  -4   5  -1 1133.59   39.30 
  -5  -5  -1 1468.35   45.10 
   5  -5   1 1576.94   49.10 
  -5  -5  -1 1541.75   51.39 
   5  -5   1 1491.55   48.30 
   5   5   1 1470.45   48.80 
  -5   5  -1 1531.95   48.60 
  -5   5  -1 1459.15   49.30 
   5   5   1 1587.44   45.70 
  -6  -5  -1  379.36   16.00 
   6  -5   1  363.06   19.10 
  -6  -5  -1  318.67   30.00 
   6  -5   1  366.96   22.00 
   6   5   1  380.26   22.40 
  -6   5  -1  301.67   21.80 
   6   5   1  394.36   16.50 
   7  -5   1  215.18   13.90 
  -7  -5  -1  216.88   15.80 
   7  -5   1  223.18   14.20 
  -7  -5  -1  218.98   11.80 
  -7   5  -1  205.28   14.00 
   7   5   1  212.38   12.40 
   7   5   1  201.48   13.50 
  -7   5  -1  200.88   14.70 
  -8  -5  -1  259.97   14.10 
   8  -5   1  239.98   16.00 
  -8  -5  -1  234.58   17.70 
  -8  -5  -1  260.47   14.10 
   8   5   1  268.97   14.70 
  -8   5  -1  240.58   16.30 
  -9  -5  -1    9.00    3.10 
  -9  -5  -1    9.10    4.40 
   9  -5   1    4.00    3.30 
   9   5   1    7.30    3.80 
  -9   5  -1    5.40    3.50 
 -10  -5  -1   17.20    6.60 
  10  -5   1   14.40    5.30 
 -10  -5  -1   21.90    5.10 
  10   5   1    8.70    4.60 
 -10   5  -1   17.20    5.70 
  11  -5   1  607.84   31.10 
 -11  -5  -1  635.44   35.30 
 -11  -5  -1  585.94   26.90 
 -11   5  -1  613.14   32.60 
  11   5   1  586.04   26.80 
  12  -5   1  105.09   12.20 
 -12  -5  -1  145.89   16.20 
 -12   5  -1  110.09   13.00 
  12   5   1  134.69   11.30 
  13  -5   1  357.86   24.80 
 -13  -5  -1  411.36   29.70 
 -13   5  -1  374.76   26.50 
  13   5   1  389.56   21.70 
  14  -5   1  643.44   35.90 
 -14  -5  -1  571.34   39.00 
  14   5   1  632.84   30.30 
 -14   5  -1  591.74   36.90 
 -15  -5  -1  592.14   41.50 
  15  -5   1  607.44   36.40 
 -15   5  -1  642.24   40.10 
  15  -6  -1    6.70    6.30 
 -15  -6   1    7.60    8.30 
 -15   6   1   11.60    8.10 
  15   6  -1   -0.10    4.00 
 -14  -6   1   62.29   14.30 
  14  -6  -1   63.89   12.10 
 -14   6   1   81.59   13.70 
  14   6  -1   66.49    9.10 
 -13  -6   1   10.90    4.30 
  13  -6  -1    5.90    4.00 
 -13  -6   1    1.30    4.40 
  13   6  -1   -5.10    2.20 
 -13   6   1   -7.00    2.90 
 -12  -6   1   11.60    5.10 
 -12  -6   1    5.30    4.40 
  12  -6  -1    9.10    5.50 
 -12   6   1   15.90    5.80 
  12   6  -1   12.60    3.60 
 -11  -6   1   23.80   11.10 
 -11  -6   1   16.30    4.30 
  11  -6  -1   30.60    8.10 
 -11   6   1   30.10   13.10 
  11   6  -1   22.50    4.10 
 -10  -6   1   47.90   10.20 
 -10  -6   1   52.19    6.00 
  10  -6  -1   69.79    8.90 
 -10   6   1   52.89    9.20 
  10   6  -1   44.00    5.60 
  -9  -6   1  143.79   13.90 
  -9  -6   1  132.79    8.50 
   9  -6  -1  133.39   12.00 
   9   6  -1  121.49    8.20 
  -9   6   1  132.29   12.10 
  -8  -6   1    0.10    1.30 
  -8  -6   1    3.00    2.90 
   8  -6  -1    5.80    3.10 
  -8   6   1   -0.40    3.00 
   8   6  -1    3.80    1.70 
  -8   6   1    1.60    2.40 
  -7  -6   1  302.77   12.90 
  -7  -6   1  334.57   20.00 
   7  -6  -1  320.47   17.50 
   7  -6  -1  333.67   18.20 
   7   6  -1  325.57   12.60 
  -7   6   1  345.77   18.30 
   7   6  -1  333.27   18.50 
  -7   6   1  306.47   17.20 
   6  -6  -1  371.66   21.50 
  -6  -6   1  421.46   21.70 
  -6  -6   1  371.96   13.30 
   6  -6  -1  388.96   19.20 
  -6   6   1  356.76   18.00 
  -6   6   1  415.86   19.50 
   6   6  -1  401.46   13.30 
   6   6  -1  335.47   22.00 
  -5  -6   1  953.70   36.70 
   5  -6  -1  971.40   34.60 
  -5  -6   1  954.20   27.40 
   5  -6  -1  916.11   33.60 
  -5   6   1  957.80   33.50 
   5   6  -1  984.80   35.20 
   5   6  -1  988.00   27.70 
   5   6  -1  991.40   27.30 
  -5   6   1  963.50   33.90 
  -4  -6   1 1057.69   38.00 
   4  -6  -1 1052.79   35.90 
   4  -6  -1 1020.80   35.00 
   4   6  -1 1065.49   36.80 
   4   6  -1 1061.09   28.80 
   4   6  -1 1062.09   28.40 
  -4   6   1 1050.79   34.80 
  -4   6   1 1058.49   35.10 
   3  -6  -1    2.60    1.60 
   3  -6  -1    4.00    1.70 
  -3  -6   1   -0.50    1.40 
  -3   6   1    0.30    0.90 
   3   6  -1    3.10    1.60 
  -3   6   1    4.70    1.70 
   3   6  -1    2.90    0.60 
   2  -6  -1 4631.94  124.09 
  -2  -6   1 4532.45  118.69 
  -2  -6   1 4547.15  126.09 
   2  -6  -1 4501.55  123.49 
   2   6  -1 4596.24  117.99 
  -2   6   1 4497.85  122.79 
   2   6  -1 4692.83  125.99 
  -2   6   1 4601.44  123.19 
  -1  -6   1  529.15   18.00 
   1  -6  -1  592.14   21.10 
   1  -6  -1  572.54   20.80 
  -1  -6   1  555.44   20.90 
  -1  -6   1  575.94   22.50 
  -1   6   1  573.34   20.20 
   1   6  -1  571.04   17.70 
   1   6  -1  591.24   22.60 
   1   6  -1  584.24   21.10 
  -1   6   1  587.34   20.80 
   0  -6  -1 2695.83   76.59 
   0  -6   1 2722.73   74.29 
   0  -6  -1 2733.03   76.29 
   0  -6   1 2777.72   76.79 
   0   6  -1 2761.72   76.69 
   0   6  -1 2722.53   74.29 
   0   6   1 2789.02   78.89 
   0   6   1 2768.12   75.69 
   0   6   1 2740.13   76.79 
   1  -6   1  217.18   10.20 
  -1  -6  -1  226.88   10.50 
  -1  -6  -1  243.98   12.80 
   1  -6   1  242.58   11.40 
   1   6   1  223.78   12.10 
   1   6   1  208.48   10.00 
   1   6   1  234.58   11.50 
  -1   6  -1  223.18   10.80 
  -1   6  -1  211.48   10.30 
   2  -6   1    4.80    1.90 
  -2  -6  -1    6.70    1.80 
  -2  -6  -1    8.00    2.40 
   2  -6   1    8.60    2.30 
   2   6   1    6.90    1.80 
   2   6   1    6.60    2.40 
   2   6   1    3.80    1.40 
  -2   6  -1    2.20    1.90 
  -2   6  -1    6.50    2.00 
   3  -6   1    8.10    2.60 
   3  -6   1    9.10    2.60 
  -3  -6  -1   15.30    3.50 
   3   6   1   10.20    2.10 
  -3   6  -1   10.50    3.10 
   3   6   1   11.10    3.00 
   3   6   1   11.10    2.40 
  -3   6  -1    9.60    2.60 
  -4  -6  -1 1332.97   45.30 
   4  -6   1 1281.27   42.00 
   4  -6   1 1325.27   42.50 
  -4  -6  -1 1234.58   39.90 
   4   6   1 1331.47   38.40 
  -4   6  -1 1282.97   41.60 
   4   6   1 1271.87   43.00 
  -4   6  -1 1300.57   43.20 
  -5  -6  -1  521.95   24.70 
  -5  -6  -1  515.95   19.50 
   5  -6   1  527.35   22.70 
   5  -6   1  543.45   23.00 
   5   6   1  498.65   22.60 
  -5   6  -1  559.54   22.70 
  -5   6  -1  499.55   23.00 
   5   6   1  538.45   19.50 
   5   6   1  510.45   19.90 
   6  -6   1  679.03   28.20 
   6  -6   1  666.43   27.70 
  -6  -6  -1  673.33   24.60 
  -6  -6  -1  729.13   31.40 
  -6   6  -1  660.83   28.70 
   6   6   1  645.04   27.90 
   6   6   1  708.63   24.90 
  -6   6  -1  710.63   28.20 
  -7  -6  -1   63.89    6.20 
   7  -6   1   67.39    8.00 
   7  -6   1   63.29    7.30 
  -7  -6  -1   75.49    9.20 
  -7   6  -1   52.69    8.70 
   7   6   1   60.29    7.20 
  -7   6  -1   72.89    8.00 
   7   6   1   73.79    7.20 
  -8  -6  -1  561.04   23.60 
  -8  -6  -1  618.54   31.30 
   8  -6   1  623.24   28.20 
  -8   6  -1  581.64   27.80 
   8   6   1  620.84   24.70 
  -9  -6  -1  926.51   42.10 
   9  -6   1  872.21   37.50 
  -9   6  -1  917.91   38.70 
   9   6   1  891.61   33.40 
  10  -6   1  105.09   11.40 
 -10  -6  -1  115.09   13.60 
  10   6   1  119.09   12.80 
 -10   6  -1  121.59   12.40 
  11  -6   1   23.80    6.10 
 -11  -6  -1   21.80    5.30 
 -11  -6  -1   30.10    8.80 
 -11   6  -1   36.50    8.50 
  11   6   1   29.70    6.10 
 -12  -6  -1   69.79   13.40 
  12  -6   1   64.59   10.90 
  12   6   1   58.79    7.90 
 -12   6  -1   57.29   11.30 
 -13  -6  -1   19.60    8.00 
  13  -6   1   14.60    6.90 
  13   6   1    9.50    4.40 
 -13   6  -1   26.50    8.30 
 -14  -6  -1   45.90   14.10 
  14  -6   1   66.19   12.20 
 -14   6  -1   52.89   12.50 
  14   6   1   63.59    8.50 
  15  -7  -1    0.80    7.30 
 -15  -7   1   -3.20    4.90 
  15   7  -1    8.80    4.50 
 -15   7   1    3.60    5.70 
 -14  -7   1   13.30    6.90 
  14  -7  -1    3.20    4.60 
 -14   7   1    0.40    4.00 
  14   7  -1    1.60    3.20 
  13  -7  -1    4.30    4.00 
 -13  -7   1    5.80    4.00 
 -13  -7   1    1.40    3.80 
  13   7  -1    5.50    4.80 
 -13   7   1   -0.50    4.60 
 -12  -7   1   16.30    6.10 
  12  -7  -1   10.70    5.30 
 -12  -7   1   12.20    3.90 
  12   7  -1   13.40    3.70 
 -12   7   1    5.60    5.00 
 -11  -7   1  161.08   10.40 
 -11  -7   1  138.09   16.20 
  11  -7  -1  140.89   13.90 
  11   7  -1  122.69    9.10 
 -11   7   1  145.79   14.50 
  10  -7  -1  117.89   12.50 
 -10  -7   1  129.19    8.90 
 -10  -7   1  148.29   15.40 
 -10   7   1  118.49   12.40 
  10   7  -1  123.19    8.40 
  -9  -7   1    7.40    2.30 
   9  -7  -1    3.70    2.90 
  -9  -7   1   19.50    5.70 
  -9   7   1   15.20    5.30 
   9   7  -1    7.50    2.20 
  -8  -7   1    3.40    3.80 
   8  -7  -1    7.50    3.40 
   8   7  -1   11.20    2.40 
  -8   7   1    9.60    3.90 
   7  -7  -1   -2.30    1.80 
  -7  -7   1    2.40    1.40 
   7  -7  -1    2.50    2.50 
  -7  -7   1    0.90    3.00 
  -7   7   1    2.80    2.30 
  -7   7   1    2.00    2.60 
   7   7  -1    0.10    1.20 
   7   7  -1    4.70    3.10 
  -6  -7   1  395.06   21.60 
   6  -7  -1  338.07   17.90 
  -6  -7   1  330.47   12.20 
   6   7  -1  349.87   12.60 
  -6   7   1  335.97   17.80 
  -6   7   1  370.56   18.30 
   6   7  -1  336.57   18.50 
   5  -7  -1  336.67   17.20 
   5  -7  -1  299.77   15.90 
  -5  -7   1  318.97   18.50 
   5   7  -1  311.87   17.00 
  -5   7   1  325.57   16.20 
   5   7  -1  329.57   10.50 
  -5   7   1  321.77   16.10 
   5   7  -1  320.97   10.90 
  -4  -7   1   12.40    3.80 
   4  -7  -1   19.30    4.10 
   4  -7  -1   12.20    3.20 
   4   7  -1   13.80    3.70 
   4   7  -1   15.70    1.40 
  -4   7   1   15.50    3.50 
  -4   7   1   10.80    2.90 
   4   7  -1   14.60    1.40 
   3  -7  -1  182.68   10.70 
   3  -7  -1  190.78   11.40 
  -3  -7   1  180.18    6.90 
  -3  -7   1  178.68   12.20 
  -3   7   1  183.28   10.40 
   3   7  -1  188.18   11.90 
  -3   7   1  187.08   10.50 
   3   7  -1  184.18    6.50 
  -2  -7   1  167.68   11.10 
   2  -7  -1  173.08   10.40 
  -2  -7   1  175.18    7.40 
   2  -7  -1  167.58    9.90 
   2   7  -1  197.18   11.00 
  -2   7   1  155.68    9.20 
   2   7  -1  187.28   11.70 
  -2   7   1  159.88    9.50 
   2   7  -1  172.08    6.80 
  -1  -7   1 1077.99   36.50 
  -1  -7   1  993.30   30.60 
   1  -7  -1 1012.40   33.90 
   1  -7  -1 1042.50   34.00 
  -1  -7   1 1068.09   34.40 
   1   7  -1 1039.10   30.20 
  -1   7   1 1046.70   33.00 
   1   7  -1 1035.00   34.30 
  -1   7   1 1012.90   33.80 
   1   7  -1 1037.80   36.10 
   0  -7  -1 8257.17  221.48 
   0   7   1 8582.74  224.38 
   0   7  -1 8402.56  224.08 
   1  -7   1  201.78   10.00 
   1  -7   1  190.28   10.60 
  -1  -7  -1  178.28    9.70 
  -1  -7  -1  180.28   11.60 
  -1   7  -1  203.08   10.70 
  -1   7  -1  198.08    9.90 
   1   7   1  183.88   10.10 
   1   7   1  216.98   12.40 
   1   7   1  192.88   10.90 
  -2  -7  -1 1541.35   46.10 
  -2  -7  -1 1603.64   51.19 
   2  -7   1 1525.95   48.30 
   2  -7   1 1567.34   47.60 
   2   7   1 1572.94   46.30 
  -2   7  -1 1606.34   48.10 
  -2   7  -1 1567.44   47.90 
   2   7   1 1586.14   50.59 
   3  -7   1 1225.98   40.50 
   3  -7   1 1237.78   40.20 
  -3  -7  -1 1284.37   43.90 
   3   7   1 1248.58   37.20 
   3   7   1 1222.28   42.00 
  -3   7  -1 1226.58   40.70 
   3   7   1 1241.58   38.10 
  -3   7  -1 1250.07   40.10 
   4  -7   1  122.79    9.30 
   4  -7   1  125.49    9.20 
  -4  -7  -1  153.08   12.00 
  -4   7  -1  142.29    9.60 
   4   7   1  137.59    8.70 
   4   7   1  130.99    7.40 
  -4   7  -1  133.29   10.10 
   4   7   1  142.59   10.50 
   5  -7   1  318.97   16.90 
   5  -7   1  349.77   17.60 
  -5  -7  -1  318.17   14.40 
  -5  -7  -1  340.57   19.50 
   5   7   1  347.97   14.20 
   5   7   1  346.17   15.00 
  -5   7  -1  329.17   21.60 
   5   7   1  328.17   17.70 
  -5   7  -1  328.37   16.90 
  -6  -7  -1  329.67   20.10 
   6  -7   1  333.27   17.70 
   6  -7   1  320.27   17.70 
  -6  -7  -1  320.07   14.70 
  -6   7  -1  321.57   18.60 
   6   7   1  306.27   14.90 
  -6   7  -1  317.97   17.30 
   6   7   1  347.07   15.00 
   6   7   1  313.97   17.90 
  -7  -7  -1    7.60    4.20 
   7  -7   1   11.80    4.20 
  -7  -7  -1    7.80    2.50 
   7   7   1   13.20    3.30 
  -7   7  -1    9.60    3.70 
   7   7   1    5.40    3.10 
  -8  -7  -1    1.70    2.20 
  -8  -7  -1    2.60    2.50 
   8  -7   1    0.70    2.40 
   8   7   1    1.30    2.70 
   9  -7   1   17.30    5.80 
  -9  -7  -1   31.10    5.50 
  -9  -7  -1   29.90    7.90 
  -9   7  -1   31.20    6.90 
   9   7   1   17.40    4.60 
 -10  -7  -1  251.67   18.30 
  10  -7   1  240.18   18.20 
 -10  -7  -1  250.17   20.80 
 -10   7  -1  254.87   18.40 
  10   7   1  269.27   15.50 
 -11  -7  -1  177.38   13.60 
 -11  -7  -1  202.48   19.30 
  11  -7   1  190.68   17.40 
  11   7   1  182.48   12.70 
 -11   7  -1  187.58   16.80 
 -12  -7  -1   -1.00    3.40 
  12  -7   1    4.60    4.10 
  12   7   1    2.30    2.60 
 -12   7  -1    4.00    5.00 
  13  -7   1   -3.50    3.00 
 -13  -7  -1  -10.00    3.90 
  13   7   1   -1.80    3.10 
 -13   7  -1    3.30    4.80 
  14  -7   1   17.80    7.20 
 -14   7  -1   25.90   13.80 
  14   7   1   32.20    5.70 
 -15  -8   1   -9.80    6.00 
  15  -8  -1   -3.40    5.20 
 -15   8   1   11.10    5.90 
  14  -8  -1   14.50    7.10 
 -14  -8   1    6.20    6.30 
  14   8  -1   17.30    4.00 
 -14   8   1   11.50    6.60 
  13  -8  -1    9.20    5.00 
 -13  -8   1    4.70    4.10 
 -13  -8   1    4.80    5.80 
 -13   8   1    0.10    4.10 
  13   8  -1   14.30    3.90 
 -12  -8   1   30.20    9.20 
  12  -8  -1   29.60    8.00 
 -12  -8   1   51.79    6.30 
  12   8  -1   32.70    5.30 
 -12   8   1   32.10    8.00 
 -11  -8   1   89.69   14.90 
  11  -8  -1   83.89   10.90 
 -11  -8   1   74.69    7.20 
 -11   8   1  114.59   12.70 
  11   8  -1   81.69    7.00 
 -10  -8   1  373.26   16.40 
 -10  -8   1  407.96   26.90 
  10  -8  -1  411.86   24.80 
 -10   8   1  378.76   23.30 
  10   8  -1  367.26   15.80 
  -9  -8   1   73.69   12.50 
   9  -8  -1   72.29    9.20 
  -9  -8   1   47.10    5.00 
   9   8  -1   63.69    5.70 
  -9   8   1   81.39    9.30 
   9   8  -1   62.29    5.00 
  -8  -8   1  141.09   14.10 
  -8  -8   1  144.19    8.70 
   8  -8  -1  148.49   12.90 
  -8   8   1  144.99   12.20 
   8   8  -1  148.09    7.50 
   8   8  -1  140.19    8.00 
  -7  -8   1 1769.12   62.49 
   7  -8  -1 1710.73   58.19 
  -7   8   1 1695.83   56.89 
  -7   8   1 1668.03   56.89 
   7   8  -1 1708.53   47.10 
   7   8  -1 1668.33   48.00 
  -6  -8   1 1769.32   63.19 
   6  -8  -1 1767.02   58.99 
   6  -8  -1 1902.01   60.79 
   6   8  -1 1869.91   50.39 
   6   8  -1 1800.32   60.49 
  -6   8   1 1810.72   58.79 
  -6   8   1 1889.01   59.49 
   6   8  -1 1871.51   49.70 
   5  -8  -1 1698.33   55.89 
   5  -8  -1 1684.43   54.99 
  -5  -8   1 1743.53   59.29 
   5   8  -1 1716.63   46.20 
  -5   8   1 1740.33   54.79 
  -5   8   1 1674.93   54.19 
   5   8  -1 1705.43   56.89 
   5   8  -1 1744.13   45.80 
  -4  -8   1 1226.68   45.50 
   4  -8  -1 1269.27   43.20 
   4  -8  -1 1292.57   42.80 
   4   8  -1 1275.27   34.50 
  -4   8   1 1311.67   42.30 
  -4   8   1 1236.08   41.40 
   4   8  -1 1281.27   34.30 
   4   8  -1 1258.97   44.30 
  -3  -8   1    4.00    1.10 
   3  -8  -1    2.80    2.00 
   3  -8  -1    1.70    1.70 
  -3  -8   1    2.20    1.90 
   3   8  -1    2.90    0.90 
  -3   8   1    1.40    1.30 
   3   8  -1    1.70    2.10 
  -3   8   1    3.60    2.00 
  -2  -8   1  499.35   16.90 
   2  -8  -1  503.25   20.80 
  -2  -8   1  481.85   22.50 
   2  -8  -1  493.85   20.60 
   2   8  -1  485.45   20.90 
  -2   8   1  494.05   20.20 
   2   8  -1  492.05   15.90 
  -2   8   1  483.65   19.40 
   2   8  -1  506.05   22.50 
  -1  -8   1  444.46   16.30 
   1  -8  -1  426.26   18.80 
   1  -8  -1  459.75   19.10 
  -1  -8   1  457.45   19.40 
   1   8  -1  479.05   21.40 
   1   8  -1  445.96   15.80 
   1   8  -1  472.85   19.70 
  -1   8   1  464.75   19.20 
  -1   8   1  446.66   17.90 
   0  -8   1 6441.16  174.78 
   0  -8  -1 6491.15  174.88 
   0  -8   1 6400.96  171.58 
   0  -8  -1 6351.16  173.68 
   0   8  -1 6435.26  177.48 
   0   8   1 6970.00  176.18 
   0   8   1 6848.81  178.98 
   0   8  -1 6427.96  171.18 
   0   8   1 6368.36  172.38 
   0   8  -1 6467.65  174.68 
   1  -8   1  547.85   20.20 
   1  -8   1  514.75   21.50 
  -1  -8  -1  554.44   23.90 
  -1  -8  -1  542.15   20.60 
  -1   8  -1  531.55   20.00 
   1   8   1  557.74   23.70 
   1   8   1  528.25   19.80 
   1   8   1  533.85   21.90 
  -1   8  -1  527.85   21.30 
  -2  -8  -1    5.40    3.00 
   2  -8   1    9.10    2.70 
  -2  -8  -1    8.40    2.30 
   2  -8   1    6.40    2.30 
  -2   8  -1    7.10    2.70 
   2   8   1   10.90    3.30 
   2   8   1    9.40    2.40 
  -2   8  -1    6.20    2.30 
   2   8   1   13.20    3.70 
  -3  -8  -1  403.56   15.90 
   3  -8   1  393.26   18.40 
  -3  -8  -1  423.06   21.10 
   3  -8   1  385.96   18.00 
  -3   8  -1  396.76   18.40 
   3   8   1  403.96   19.40 
   3   8   1  399.76   19.90 
  -3   8  -1  437.56   18.90 
   3   8   1  430.06   16.10 
   4  -8   1 3047.90   90.79 
   4  -8   1 3160.88   90.89 
  -4  -8  -1 3231.08   95.59 
  -4   8  -1 3117.99   90.09 
   4   8   1 3165.48   87.09 
   4   8   1 3140.39   92.79 
  -4   8  -1 3027.50   90.99 
   5  -8   1 2343.67   71.69 
   5  -8   1 2266.27   71.09 
   5   8   1 2395.76   65.59 
   5   8   1 2384.06   67.39 
   5   8   1 2285.97   72.89 
  -5   8  -1 2229.18   71.89 
   6  -8   1 2521.45   76.99 
  -6  -8  -1 2456.35   80.59 
   6  -8   1 2486.45   76.39 
  -6  -8  -1 2417.66   70.59 
  -6   8  -1 2372.26   76.79 
   6   8   1 2459.95   69.89 
  -6   8  -1 2510.65   75.69 
   6   8   1 2466.75   71.29 
   6   8   1 2335.37   76.29 
   7  -8   1   37.00    7.10 
  -7  -8  -1   41.40    5.10 
  -7  -8  -1   55.89    9.80 
   7   8   1   49.60    5.90 
  -7   8  -1   37.00    6.80 
   7   8   1   47.00    5.60 
   8  -8   1   16.90    5.20 
  -8  -8  -1   17.50    3.90 
  -8  -8  -1   20.30    6.50 
   8   8   1   12.10    3.50 
  -8   8  -1   16.20    5.00 
   8   8   1   17.80    4.60 
  -9  -8  -1 1340.07   54.69 
   9  -8   1 1219.48   48.60 
  -9  -8  -1 1244.48   42.30 
   9   8   1 1083.19   40.70 
  -9   8  -1 1267.17   48.70 
   9   8   1 1318.37   43.60 
 -10  -8  -1  592.24   25.90 
  10  -8   1  596.54   31.30 
 -10  -8  -1  609.14   35.60 
 -10   8  -1  610.54   31.50 
  10   8   1  624.04   25.70 
  10   8   1  644.04   27.10 
 -11  -8  -1  119.19   10.50 
  11  -8   1  117.59   12.80 
 -11  -8  -1  117.29   14.70 
  11   8   1  117.89   10.00 
 -11   8  -1  111.09   12.90 
  11   8   1  124.29   11.10 
  12  -8   1   20.80    7.80 
 -12  -8  -1   29.70    6.40 
 -12  -8  -1   17.40    7.80 
  12   8   1   30.00    6.30 
  12   8   1   37.60    6.40 
 -12   8  -1   50.19   10.50 
 -13  -8  -1   15.20    7.70 
  13  -8   1    7.60    5.40 
  13   8   1    6.80    4.40 
 -13   8  -1   12.10    6.50 
  14  -8   1   24.90    8.70 
 -14  -8  -1   25.80   11.00 
  14   8   1   27.70    6.30 
 -14   8  -1   31.10    8.80 
 -15  -9   1  503.05   39.60 
  15  -9  -1  545.85   43.10 
 -15   9   1  563.04   35.90 
 -14  -9   1  171.58   21.60 
  14  -9  -1  155.48   17.90 
 -14   9   1  157.88   18.50 
  14   9  -1  151.88   11.40 
 -13  -9   1   70.19   14.70 
  13  -9  -1   54.29   11.10 
  13   9  -1   74.19    7.40 
 -13   9   1   79.49   13.50 
  12  -9  -1  708.33   37.20 
 -12  -9   1  690.23   26.40 
 -12  -9   1  693.33   41.00 
  12   9  -1  701.83   27.10 
 -12   9   1  713.73   36.90 
  12   9  -1  693.83   25.80 
  11  -9  -1 1185.68   71.79 
 -11  -9   1 1308.97   40.80 
 -11  -9   1 1276.77   57.99 
 -11   9   1 1283.97   52.29 
  11   9  -1 1211.78   39.50 
  11   9  -1 1319.27   41.60 
  10  -9  -1 1290.67   51.89 
 -10  -9   1 1299.77   39.90 
 -10  -9   1 1292.87   56.59 
  10   9  -1 1151.58   38.30 
  10   9  -1 1269.47   40.30 
 -10   9   1 1403.16   51.99 
  -9  -9   1  375.16   25.20 
   9  -9  -1  358.46   22.50 
  -9   9   1  377.26   21.90 
   9   9  -1  324.67   13.30 
   8  -9  -1    6.10    3.50 
  -8  -9   1    0.50    3.20 
   8   9  -1    6.40    1.80 
   8   9  -1    7.50    1.70 
  -8   9   1    4.70    3.20 
   7  -9  -1  365.76   20.90 
  -7  -9   1  357.46   23.50 
   7   9  -1  352.46   15.60 
   7   9  -1  356.16   13.00 
  -7   9   1  348.47   19.50 
   6  -9  -1  346.77   19.50 
  -6  -9   1  328.27   21.20 
   6  -9  -1  333.27   18.60 
   6   9  -1  332.07   11.50 
  -6   9   1  354.76   18.70 
  -6   9   1  326.47   18.00 
   6   9  -1  351.36   19.80 
   6   9  -1  339.07   11.20 
   5  -9  -1 1589.64   53.49 
  -5  -9   1 1571.54   58.29 
   5  -9  -1 1703.93   56.79 
   5   9  -1 1630.34   55.49 
  -5   9   1 1565.54   52.29 
   5   9  -1 1692.13   43.60 
   5   9  -1 1623.94   43.70 
  -5   9   1 1584.54   54.09 
   4  -9  -1   43.10    5.70 
  -4  -9   1   45.00    7.70 
   4  -9  -1   61.79    7.10 
   4   9  -1   52.89    6.90 
   4   9  -1   48.30    3.10 
  -4   9   1   41.00    5.30 
  -4   9   1   46.30    5.80 
   4   9  -1   50.79    3.10 
  -3  -9   1   28.70    3.40 
   3  -9  -1   41.60    5.40 
  -3  -9   1   37.00    6.70 
   3  -9  -1   25.60    4.60 
  -3   9   1   36.80    4.90 
   3   9  -1   40.70    6.60 
   3   9  -1   34.30    2.80 
   3   9  -1   35.90    6.10 
  -3   9   1   36.80    4.80 
  -2  -9   1 1903.81   61.49 
   2  -9  -1 1908.21   58.39 
  -2  -9   1 1867.41   53.09 
   2  -9  -1 1930.21   58.79 
   2   9  -1 1858.01   51.79 
   2   9  -1 1812.22   58.39 
   2   9  -1 1889.81   60.99 
  -2   9   1 1778.72   55.79 
  -2   9   1 1899.71   57.69 
  -1  -9   1 5544.55  152.58 
  -1  -9   1 5456.75  147.99 
   1  -9  -1 5627.24  151.98 
   1  -9  -1 5440.36  152.18 
   1   9  -1 5542.25  147.09 
  -1   9   1 5359.46  149.79 
  -1   9   1 5602.34  152.18 
   1   9  -1 5899.61  153.98 
   1   9  -1 5813.92  156.88 
   0  -9  -1 3736.83  105.19 
   0  -9  -1 3672.73  106.09 
   0  -9   1 3672.63  106.09 
   0  -9   1 3745.73  103.19 
   0   9  -1 3828.12  106.49 
   0   9   1 3874.91  106.99 
   0   9  -1 3752.92  102.39 
   0   9   1 3984.00  110.99 
   0   9   1 3677.43  103.39 
   0   9  -1 3803.32  109.59 
  -1  -9  -1 5199.38  139.89 
   1  -9   1 5022.80  141.59 
  -1  -9  -1 5252.67  145.39 
   1  -9   1 5136.79  139.39 
   1   9   1 5223.68  142.39 
   1   9   1 5211.38  144.99 
   1   9   1 5114.59  138.49 
  -1   9  -1 5271.07  141.69 
  -1   9  -1 5016.00  138.79 
   2  -9   1  441.66   19.20 
   2  -9   1  432.66   20.20 
  -2  -9  -1  482.95   23.20 
  -2  -9  -1  491.15   18.90 
   2   9   1  475.95   21.30 
   2   9   1  442.46   22.10 
   2   9   1  460.45   18.10 
  -2   9  -1  466.85   20.20 
  -2   9  -1  450.35   19.30 
  -3  -9  -1  209.18   10.90 
   3  -9   1  231.58   13.20 
   3  -9   1  230.78   13.80 
  -3  -9  -1  225.58   15.20 
   3   9   1  221.28   10.90 
  -3   9  -1  215.88   13.10 
   3   9   1  217.78   11.20 
  -3   9  -1  224.78   13.30 
   3   9   1  220.88   14.40 
  -4  -9  -1 1226.68   46.40 
   4  -9   1 1174.18   42.40 
   4  -9   1 1250.67   42.90 
   4   9   1 1247.78   39.00 
   4   9   1 1236.68   44.60 
  -4   9  -1 1134.09   47.50 
   4   9   1 1305.67   37.90 
  -4   9  -1 1242.68   42.20 
  -5  -9  -1  719.43   33.50 
   5  -9   1  780.22   30.90 
   5  -9   1  735.53   30.20 
   5   9   1  713.43   26.10 
   5   9   1  728.23   31.20 
  -5   9  -1  685.53   30.10 
  -5   9  -1  724.43   29.40 
   5   9   1  758.42   24.90 
  -6  -9  -1  521.75   27.80 
   6  -9   1  509.05   24.80 
   6  -9   1  502.85   24.60 
   6   9   1  512.45   20.90 
  -6   9  -1  512.75   24.20 
   6   9   1  476.55   24.70 
   6   9   1  542.25   19.90 
  -7  -9  -1   38.10    8.30 
   7  -9   1   31.00    6.70 
   7   9   1   22.80    4.50 
   7   9   1   24.90    4.50 
  -7   9  -1   28.60    6.10 
   8  -9   1    1.80    2.90 
  -8  -9  -1    2.10    2.20 
  -8  -9  -1    1.80    3.30 
  -8   9  -1    2.90    3.20 
   8   9   1    2.80    2.60 
   8   9   1    1.00    1.90 
  -9  -9  -1  237.08   13.90 
  -9  -9  -1  267.87   21.80 
   9  -9   1  254.37   18.40 
   9   9   1  263.77   15.00 
   9   9   1  198.28   13.00 
  -9   9  -1  244.58   18.00 
 -10  -9  -1  196.58   12.70 
  10  -9   1  168.08   19.70 
 -10  -9  -1  187.28   24.10 
  10   9   1  193.78   13.30 
 -10   9  -1  183.78   17.60 
  10   9   1  210.48   12.90 
 -11  -9  -1  550.54   28.90 
 -11  -9  -1  596.74   37.00 
  11  -9   1  554.94   31.50 
 -11   9  -1  592.04   32.20 
 -12  -9  -1  174.08   13.70 
  12  -9   1  188.48   17.70 
 -12  -9  -1  229.68   22.70 
  12   9   1  186.38   14.40 
 -12   9  -1  212.48   19.00 
  12   9   1  177.88   12.60 
  13  -9   1   34.80    9.10 
 -13  -9  -1   29.90   11.60 
  13   9   1   46.50    7.20 
 -13   9  -1   39.60    9.80 
  14  -9   1  345.87   27.50 
 -14  -9  -1  371.86   33.30 
  14   9   1  393.96   20.90 
 -14   9  -1  343.97   27.60 
 -15 -10   1   65.39   17.10 
  15 -10  -1   86.09   15.30 
 -15  10   1  110.19   17.20 
 -14 -10   1  107.19   20.90 
  14 -10  -1   97.69   16.30 
 -14  10   1  117.19   20.50 
 -13 -10   1   10.50    6.60 
  13 -10  -1    6.00    5.40 
  13  10  -1    3.70    2.70 
 -13  10   1   -7.80    3.70 
 -12 -10   1   54.29   12.70 
  12 -10  -1   45.60   10.10 
  12  10  -1   46.70    6.00 
 -12  10   1   72.59   12.30 
  12  10  -1   43.30    5.20 
 -11 -10   1  226.18   22.00 
  11 -10  -1  250.07   19.80 
  11  10  -1  204.38   11.30 
  11  10  -1  206.28   10.30 
 -11  10   1  213.28   17.90 
  10 -10  -1  396.16   24.50 
 -10 -10   1  379.76   34.00 
 -10  10   1  347.47   28.00 
  10  10  -1  303.77   12.90 
  -9 -10   1  223.58   19.10 
   9 -10  -1  199.68   17.10 
   9  10  -1  195.58    8.80 
  -9  10   1  233.98   16.80 
   9  10  -1  218.58   10.10 
   8 -10  -1  163.68   14.40 
  -8 -10   1  158.78   15.70 
   8  10  -1  146.19    6.60 
   8  10  -1  141.69    7.20 
  -8  10   1  161.08   13.50 
   7 -10  -1  814.42   35.60 
  -7 -10   1  769.62   38.00 
  -7  10   1  864.21   34.70 
   7  10  -1  804.52   24.20 
   7  10  -1  823.92   23.80 
   6 -10  -1 4099.29  129.09 
   6 -10  -1 4569.74  128.49 
  -6 -10   1 4463.55  132.89 
   6  10  -1 4111.09  131.09 
  -6  10   1 4588.54  126.49 
  -6  10   1 4106.29  126.89 
   6  10  -1 4611.34  113.89 
   6  10  -1 4444.96  113.59 
  -5 -10   1 3188.78   99.59 
   5 -10  -1 3102.09   94.29 
   5 -10  -1 3202.58   95.69 
  -5  10   1 3286.07   94.09 
   5  10  -1 3204.58   83.09 
   5  10  -1 3100.79   96.39 
  -5  10   1 2973.50   92.39 
   5  10  -1 3277.47   82.99 
  -4 -10   1 1169.58   36.80 
  -4 -10   1 1139.59   48.20 
   4 -10  -1 1245.68   43.90 
  -4  10   1 1236.98   43.90 
  -4  10   1 1259.77   46.00 
   4  10  -1 1246.68   34.10 
   4  10  -1 1190.28   58.39 
   3 -10  -1  735.63   29.10 
   3 -10  -1  678.03   28.10 
  -3 -10   1  706.93   23.10 
  -3 -10   1  688.83   31.10 
  -3  10   1  701.13   27.80 
   3  10  -1  717.63   21.90 
   3  10  -1  706.93   30.50 
   3  10  -1  703.03   29.30 
  -3  10   1  693.03   26.90 
  -2 -10   1  497.45   18.70 
  -2 -10   1  521.05   25.00 
   2 -10  -1  505.55   22.40 
   2 -10  -1  518.55   22.60 
  -2  10   1  529.65   22.40 
   2  10  -1  523.45   24.90 
   2  10  -1  485.75   22.70 
   2  10  -1  497.05   19.50 
  -2  10   1  521.15   21.10 
  -1 -10   1 1202.68   37.40 
   1 -10  -1 1157.88   40.70 
  -1 -10   1 1169.38   41.00 
   1 -10  -1 1189.08   40.40 
  -1  10   1 1224.18   41.00 
  -1  10   1 1196.88   38.70 
   1  10  -1 1162.48   43.50 
   1  10  -1 1143.99   35.90 
   1  10  -1 1215.48   41.70 
   0 -10  -1  147.49   10.10 
   0 -10   1  150.68   10.60 
   0 -10  -1  135.59   10.20 
   0 -10   1  133.69    8.80 
   0  10  -1  148.99    8.60 
   0  10   1  130.89    8.70 
   0  10   1  138.59   11.70 
   0  10   1  148.89   10.70 
   0  10  -1  167.88   12.60 
   0  10  -1  134.49   10.10 
   1 -10   1   32.50    5.00 
  -1 -10  -1   27.00    4.60 
   1 -10   1   40.20    5.30 
   1  10   1   39.20    6.90 
   1  10   1   28.90    5.20 
   1  10   1   26.70    4.30 
  -1  10  -1   25.20    4.30 
  -1  10  -1   26.90    5.10 
   2 -10   1    0.10    1.30 
  -2 -10  -1    2.70    1.50 
  -2 -10  -1    1.90    1.30 
   2 -10   1    2.10    1.90 
   2  10   1    3.60    2.20 
   2  10   1    3.90    1.60 
   2  10   1    3.50    2.40 
  -2  10  -1    1.40    1.90 
  -3 -10  -1   51.89    8.60 
  -3 -10  -1   61.79    5.50 
   3 -10   1   58.79    6.60 
   3 -10   1   53.89    6.30 
   3  10   1   60.79    7.30 
   3  10   1   70.89    6.00 
   3  10   1   58.49    7.60 
  -3  10  -1   58.89    6.70 
  -3  10  -1   46.60    5.80 
   4 -10   1  976.00   37.30 
   4 -10   1 1033.60   37.30 
  -4 -10  -1  964.90   40.70 
   4  10   1  966.90   32.90 
  -4  10  -1  970.60   37.00 
  -4  10  -1 1021.10   36.80 
   4  10   1 1043.00   32.40 
   4  10   1  985.60   39.10 
   5 -10   1 5229.48  152.58 
  -5 -10  -1 5525.15  158.78 
   5 -10   1 5581.04  153.28 
   5  10   1 5403.66  146.79 
   5  10   1 5391.96  154.88 
  -5  10  -1 5504.45  151.98 
   5  10   1 5559.24  144.99 
  -5  10  -1 5290.07  152.98 
   6 -10   1 2767.42   86.59 
  -6 -10  -1 2777.22   92.09 
   6  10   1 2759.72   80.09 
  -6  10  -1 2830.72   85.79 
   6  10   1 2806.42   78.29 
   7 -10   1   88.99    9.90 
  -7 -10  -1   88.99   13.70 
  -7  10  -1   65.79    8.50 
   7  10   1   82.99    7.30 
   7  10   1   90.29    7.60 
   8 -10   1  243.58   17.30 
  -8 -10  -1  182.98   17.50 
   8  10   1  175.88   11.40 
   8  10   1  200.88   12.60 
  -8  10  -1  228.88   16.20 
  -9 -10  -1 1831.32   70.99 
   9 -10   1 1846.02   64.99 
   9  10   1 1773.22   56.69 
  -9  10  -1 1873.31   64.59 
   9  10   1 1577.24   53.99 
 -10 -10  -1  866.81   45.00 
 -10 -10  -1  818.92   32.10 
  10 -10   1  839.82   39.60 
  10  10   1  866.91   31.40 
 -10  10  -1  851.01   39.40 
  10  10   1  816.52   32.60 
 -11 -10  -1  371.86   19.90 
 -11 -10  -1  402.46   30.00 
  11 -10   1  422.26   26.70 
  11  10   1  364.36   20.30 
 -11  10  -1  408.76   26.20 
  11  10   1  406.86   19.20 
  12 -10   1  123.09   14.70 
 -12 -10  -1  109.09   11.30 
 -12 -10  -1  121.19   19.30 
 -12  10  -1   93.89   15.00 
  12  10   1  101.99   10.60 
  12  10   1  107.79    9.60 
 -13 -10  -1   11.20    8.60 
  13 -10   1   -1.00    4.70 
 -13  10  -1    9.80    6.00 
  13  10   1   -1.10    3.30 
  14 -10   1   -1.70    4.50 
 -14 -10  -1    2.90    6.60 
  14  10   1   -6.80    5.80 
 -14  10  -1   -2.40    5.40 
  14 -11  -1  185.98   20.20 
 -14 -11   1  185.58   22.80 
 -14  11   1  211.58   20.00 
  13 -11  -1  257.97   22.80 
 -13 -11   1  288.47   27.40 
 -13  11   1  283.07   23.10 
  13  11  -1  299.27   13.10 
 -12 -11   1  243.28   23.70 
  12 -11  -1  199.18   19.00 
  12  11  -1  204.58   11.90 
 -12  11   1  192.58   17.80 
  12  11  -1  204.88   10.10 
 -11 -11   1 1181.58   55.49 
  11 -11  -1 1136.59   49.80 
 -11  11   1 1134.59   48.10 
  11  11  -1  916.31   31.50 
 -10 -11   1  956.60   48.20 
  10 -11  -1  929.31   62.29 
 -10  11   1  987.90   42.70 
  10  11  -1  965.40   29.40 
  10  11  -1  883.41   27.80 
  -9 -11   1   83.69   14.30 
   9 -11  -1   69.79   11.30 
  -9  11   1   92.69   10.40 
   9  11  -1   81.69    5.10 
  -8 -11   1   64.29   11.60 
   8 -11  -1   71.19    9.50 
   8  11  -1   69.49    4.20 
   8  11  -1   69.59    3.90 
  -8  11   1   70.29    8.90 
  -7 -11   1    3.90    3.60 
   7 -11  -1    6.50    3.40 
   7  11  -1    0.50    0.90 
   7  11  -1    2.30    1.10 
  -7  11   1    4.30    2.20 
  -6 -11   1  319.47   22.20 
   6 -11  -1  323.57   19.90 
   6  11  -1  316.77   10.50 
   6  11  -1  318.77   10.60 
  -6  11   1  330.57   18.70 
  -5 -11   1   22.10    6.10 
   5 -11  -1   25.70    5.80 
   5 -11  -1   23.40    5.30 
  -5  11   1   26.50    5.50 
   5  11  -1   20.00    2.10 
   5  11  -1   22.40    3.40 
   5  11  -1   24.40    6.20 
  -5  11   1   17.60    4.50 
   4 -11  -1  831.32   34.00 
  -4 -11   1  833.62   37.10 
  -4 -11   1  837.02   26.00 
   4 -11  -1  816.42   33.50 
   4  11  -1  867.71   25.10 
   4  11  -1  839.72   34.90 
   4  11  -1  797.02   35.40 
   4  11  -1  885.71   26.30 
  -4  11   1  834.32   32.70 
  -4  11   1  839.12   32.10 
  -3 -11   1    5.90    1.90 
  -3 -11   1    1.70    2.20 
   3 -11  -1    2.40    2.40 
   3  11  -1    5.10    1.50 
  -3  11   1    4.00    2.30 
   3  11  -1    9.90    3.80 
  -3  11   1    8.10    3.10 
   3  11  -1   10.70    4.70 
  -2 -11   1  256.87   17.10 
   2 -11  -1  263.67   15.40 
  -2 -11   1  258.17   12.30 
   2 -11  -1  232.08   14.60 
   2  11  -1  250.77   16.80 
   2  11  -1  271.17   11.30 
   2  11  -1  260.07   15.60 
  -2  11   1  253.47   14.80 
  -2  11   1  251.97   13.70 
  -1 -11   1 2252.67   65.89 
   1 -11  -1 2262.97   70.79 
   1 -11  -1 2279.77   69.39 
  -1 -11   1 2204.28   69.99 
   1  11  -1 2260.37   64.29 
   1  11  -1 2352.76   70.89 
  -1  11   1 2211.28   66.79 
  -1  11   1 2261.47   69.79 
   1  11  -1 2291.27   73.69 
   0 -11   1 4930.91  134.59 
   0 -11   1 5067.79  139.49 
   0 -11  -1 4857.11  138.09 
   0 -11  -1 5067.49  137.09 
   0  11  -1 4852.21  133.19 
   0  11   1 4794.72  134.09 
   0  11   1 5006.40  138.59 
   0  11  -1 4922.01  138.19 
   0  11  -1 4962.80  142.19 
   0  11   1 4870.61  141.99 
   1 -11   1 1390.06   45.10 
  -1 -11  -1 1406.86   45.60 
   1 -11   1 1357.16   47.20 
   1  11   1 1417.96   48.00 
   1  11   1 1359.96   43.40 
  -1  11  -1 1377.76   44.10 
  -1  11  -1 1371.06   46.90 
   1  11   1 1412.26   50.49 
  -2 -11  -1  642.74   29.60 
  -2 -11  -1  605.54   24.00 
   2 -11   1  587.34   26.10 
   2 -11   1  615.24   25.20 
  -2  11  -1  592.34   24.50 
   2  11   1  626.04   27.30 
   2  11   1  609.14   28.70 
  -2  11  -1  605.74   25.90 
   2  11   1  621.34   23.10 
   3 -11   1 1825.62   58.89 
  -3 -11  -1 1794.82   54.89 
   3 -11   1 1762.22   59.29 
  -3 -11  -1 1867.51   71.49 
   3  11   1 1770.02   54.39 
   3  11   1 1815.72   62.89 
   3  11   1 1913.31   55.49 
  -3  11  -1 1817.52   60.39 
   3  11   1 1823.32   62.29 
   4 -11   1  691.03   29.10 
   4 -11   1  651.43   29.30 
  -4 -11  -1  687.73   32.70 
   4  11   1  678.63   25.10 
  -4  11  -1  677.53   28.60 
  -4  11  -1  704.83   29.40 
   4  11   1  680.13   24.40 
   4  11   1  717.53   31.80 
   5 -11   1 1543.55   53.59 
  -5 -11  -1 1547.05   58.59 
   5  11   1 1561.54   46.30 
  -5  11  -1 1537.75   52.59 
   5  11   1 1560.54   48.00 
   5  11   1 1514.25   58.29 
  -6 -11  -1  658.83   33.80 
   6 -11   1  637.34   29.70 
   6  11   1  658.03   23.30 
   6  11   1  617.64   24.50 
  -6  11  -1  661.93   29.10 
   7 -11   1   38.30    7.70 
  -7 -11  -1   47.60    9.70 
   7  11   1   29.10    4.80 
  -7  11  -1   42.50    7.70 
   7  11   1   48.70    5.70 
   8 -11   1    1.40    2.60 
  -8 -11  -1    0.30    3.10 
  -8  11  -1    7.10    3.30 
   8  11   1    9.10    2.80 
   8  11   1    5.20    2.70 
   9 -11   1  110.99   13.00 
  -9 -11  -1  121.79   15.20 
   9  11   1  111.69    8.80 
   9  11   1  137.99   10.20 
  -9  11  -1  122.19   12.70 
 -10 -11  -1  877.71   46.60 
  10 -11   1  869.31   41.80 
  10  11   1  896.91   33.90 
 -10  11  -1  899.71   41.10 
  10  11   1  883.51   32.00 
 -11 -11  -1  359.06   29.00 
  11 -11   1  356.56   25.00 
  11  11   1  335.57   16.90 
 -11  11  -1  327.37   23.50 
  11  11   1  331.47   18.20 
  12 -11   1  341.67   25.70 
 -12 -11  -1  330.47   28.70 
 -12  11  -1  297.37   23.40 
  13 -11   1  168.78   18.70 
 -13 -11  -1  186.78   22.60 
 -13  11  -1  195.38   19.70 
  13  11   1  187.38   12.60 
  14 -11   1  228.58   22.10 
 -14 -11  -1  222.78   26.30 
 -14  11  -1  199.98   20.20 
 -14 -12   1   99.19   19.10 
 -14  12   1   90.69   15.50 
  13 -12  -1    8.20    5.40 
 -13 -12   1    1.20    4.90 
 -13  12   1    3.60    4.60 
 -12 -12   1   17.30    6.20 
  12 -12  -1   18.80    7.90 
  12  12  -1   20.90    2.80 
 -12  12   1   15.60    6.50 
 -11 -12   1  157.48   19.00 
  11 -12  -1  130.19   15.80 
 -11  12   1  151.18   15.50 
  11  12  -1  162.78    7.10 
  10 -12  -1  216.38   18.90 
 -10 -12   1  218.48   21.00 
  10  12  -1  211.88    8.30 
 -10  12   1  187.78   17.00 
  10  12  -1  216.28    8.00 
   9 -12  -1  197.38   17.40 
  -9 -12   1  207.68   19.80 
  -9  12   1  196.18   15.90 
   8 -12  -1  464.75   26.90 
  -8 -12   1  494.35   30.30 
  -8  12   1  460.55   25.10 
   7 -12  -1  705.13   33.50 
  -7 -12   1  646.84   35.40 
  -7  12   1  695.63   31.40 
   7  12  -1  692.23   19.30 
   7  12  -1  682.83   19.30 
   6 -12  -1 1468.95   54.09 
  -6 -12   1 1439.16   57.69 
  -6  12   1 1431.46   51.49 
   6  12  -1 1471.55   39.60 
   6  12  -1 1462.05   39.70 
   5 -12  -1 1208.48   45.80 
  -5 -12   1 1163.58   48.50 
   5  12  -1 1192.38   33.50 
   5  12  -1 1182.28   33.80 
  -5  12   1 1179.38   43.70 
   4 -12  -1  707.43   30.80 
  -4 -12   1  714.43   23.70 
   4 -12  -1  724.63   31.60 
  -4 -12   1  738.53   34.80 
   4  12  -1  715.83   22.50 
  -4  12   1  741.33   30.50 
  -4  12   1  695.43   29.00 
   4  12  -1  722.53   32.20 
   4  12  -1  715.43   33.10 
   3 -12  -1 1616.94   55.19 
  -3 -12   1 1646.64   48.70 
  -3 -12   1 1588.64   58.99 
   3 -12  -1 1586.64   63.09 
   3  12  -1 1660.03   56.69 
   3  12  -1 1661.73   58.59 
  -3  12   1 1588.04   52.39 
   3  12  -1 1627.94   46.70 
  -3  12   1 1645.74   54.49 
  -2 -12   1  720.63   25.60 
   2 -12  -1  659.93   29.10 
   2 -12  -1  723.33   29.80 
   2  12  -1  695.83   32.40 
  -2  12   1  713.73   31.10 
  -2  12   1  649.34   26.70 
   2  12  -1  657.43   23.40 
   2  12  -1  783.92   33.60 
   1 -12  -1  188.78   12.90 
  -1 -12   1  193.58   11.30 
   1  12  -1  170.38   13.80 
  -1  12   1  199.78   11.80 
   1  12  -1  184.28   10.20 
  -1  12   1  188.28   13.30 
   0 -12   1  468.15   33.10 
   0 -12  -1  435.66   26.40 
   0 -12   1  457.25   20.10 
   0 -12  -1  456.15   21.40 
   0  12  -1  473.95   19.30 
   0  12   1  471.35   30.00 
   0  12  -1  471.25   22.70 
   0  12   1  482.15   22.90 
   0  12   1  440.26   19.40 
   0  12  -1  430.86   34.60 
   1 -12   1    3.10    2.90 
   1 -12   1    5.30    2.60 
  -1 -12  -1    0.90    1.90 
   1  12   1    8.50    4.30 
  -1  12  -1    2.50    2.00 
   1  12   1    0.40    3.90 
   1  12   1    2.60    1.90 
  -2 -12  -1    0.70    2.10 
   2 -12   1   -1.50    1.90 
   2 -12   1   -0.10    1.50 
  -2 -12  -1   -0.70    1.30 
   2  12   1    2.10    1.50 
   2  12   1   -4.10    2.50 
  -2  12  -1    0.50    1.70 
  -2  12  -1   -2.10    1.70 
   2  12   1    0.20    1.70 
   3 -12   1  482.65   23.80 
  -3 -12  -1  476.75   26.30 
  -3 -12  -1  484.95   20.40 
   3 -12   1  480.15   22.90 
   3  12   1  501.55   24.90 
   3  12   1  463.45   19.50 
  -3  12  -1  480.25   22.90 
  -3  12  -1  468.85   22.20 
   3  12   1  476.35   25.50 
   4 -12   1  157.28   12.20 
  -4 -12  -1  176.88   15.20 
  -4 -12  -1  170.78   10.00 
   4 -12   1  157.98   12.70 
   4  12   1  157.78   13.60 
   4  12   1  156.18    9.90 
  -4  12  -1  158.78   12.10 
   4  12   1  184.18   14.50 
   4  12   1  161.88    9.70 
  -4  12  -1  157.58   12.50 
   5 -12   1  226.08   15.70 
  -5 -12  -1  206.88   17.40 
   5  12   1  217.78   12.00 
  -5  12  -1  218.58   14.90 
   6 -12   1  647.04   30.10 
  -6 -12  -1  633.54   33.90 
  -6  12  -1  605.04   28.40 
   6  12   1  584.54   21.90 
   6  12   1  595.94   23.50 
   7 -12   1  380.56   22.50 
  -7 -12  -1  337.57   24.60 
   7  12   1  368.06   17.10 
   7  12   1  320.17   15.20 
  -7  12  -1  380.66   21.50 
   8 -12   1  237.38   18.10 
  -8 -12  -1  215.28   20.20 
  -8  12  -1  211.18   16.60 
   8  12   1  230.98   12.50 
   8  12   1  243.28   13.50 
   9 -12   1  348.77   23.20 
  -9 -12  -1  310.97   32.80 
   9  12   1  323.57   16.50 
  -9  12  -1  308.47   22.90 
   9  12   1  280.87   14.80 
  10 -12   1  806.32   40.90 
 -10 -12  -1  885.31   47.00 
  10  12   1  864.61   31.00 
  10  12   1  851.91   32.60 
 -10  12  -1  872.91   40.60 
 -11 -12  -1  168.58   19.20 
  11 -12   1  147.49   16.40 
 -11  12  -1  162.28   16.20 
  11  12   1  151.38   11.60 
  11  12   1  160.68   10.70 
 -12 -12  -1   52.59   13.30 
  12 -12   1   46.30   10.80 
 -12  12  -1   45.00   10.30 
  12  12   1   52.19    6.40 
  13 -12   1   15.90    8.60 
 -13 -12  -1   18.00    8.40 
 -13  12  -1    5.70    6.50 
 -14 -13   1   10.40    8.80 
  14 -13  -1   -0.30    5.80 
 -14  13   1   -1.60    5.40 
 -13 -13   1  138.09   26.60 
  13 -13  -1  140.29   16.70 
 -13  13   1  117.69   20.50 
 -12 -13   1   74.19   16.10 
  12 -13  -1   53.99   12.80 
 -12  13   1  104.39   13.20 
 -11 -13   1   96.39   17.70 
  11 -13  -1   89.29   14.60 
 -11  13   1   96.99   12.80 
 -10 -13   1  133.69   17.40 
  10 -13  -1  125.99   15.00 
 -10  13   1  132.49   14.30 
  -9 -13   1   61.09   16.70 
  -9  13   1   64.99   13.60 
  -8 -13   1   58.49   11.70 
   8 -13  -1   47.60    9.20 
  -8  13   1   35.90    7.80 
  -7 -13   1   -3.90    2.50 
  -7  13   1    0.20    2.50 
  -6 -13   1   47.10    9.80 
   6 -13  -1   51.09    9.10 
   6  13  -1   64.09    3.70 
  -6  13   1   64.69    8.20 
   6  13  -1   67.69    5.70 
   5 -13  -1    3.70    2.70 
  -5 -13   1    4.70    3.60 
  -5  13   1    1.70    2.60 
   5  13  -1    3.20    1.40 
   5  13  -1    2.70    1.40 
   5  13  -1    5.80    3.20 
  -4 -13   1   55.29   10.20 
  -4 -13   1   59.49    5.10 
   4 -13  -1   62.49    8.00 
  -4  13   1   56.39    7.20 
   4  13  -1   71.59    8.90 
  -4  13   1   55.09    7.20 
   4  13  -1   55.29    5.30 
   3 -13  -1  195.78   14.10 
  -3 -13   1  196.58   10.90 
  -3 -13   1  203.68   16.50 
   3 -13  -1  216.68   15.00 
   3  13  -1  179.98    9.30 
   3  13  -1  198.88   15.00 
   3  13  -1  223.08   16.70 
  -3  13   1  210.38   14.20 
  -3  13   1  179.98   12.50 
   2 -13  -1  366.06   21.80 
   2 -13  -1  359.16   20.20 
  -2 -13   1  363.26   16.90 
  -2  13   1  385.26   20.30 
   2  13  -1  360.56   22.30 
   2  13  -1  399.56   21.40 
   2  13  -1  375.66   15.50 
   1 -13  -1  839.02   34.30 
  -1 -13   1  813.82   30.00 
   1 -13  -1  822.42   33.00 
  -1 -13   1  778.02   33.20 
  -1  13   1  786.42   29.90 
   1  13  -1  819.92   33.80 
  -1  13   1  759.32   35.70 
  -1  13   1  849.41   33.70 
   1  13  -1  791.92   28.00 
   1  13  -1  794.42   36.10 
   0 -13  -1  679.43   30.40 
   0 -13  -1  726.23   29.90 
   0 -13   1  733.63   28.30 
   0 -13   1  723.43   31.10 
   0  13   1  718.43   34.00 
   0  13  -1  724.13   26.90 
   0  13  -1  691.53   33.40 
   0  13   1  718.83   27.30 
   0  13  -1  714.13   30.90 
   0  13   1  751.42   31.40 
  -1 -13  -1  282.67   16.00 
   1 -13   1  286.97   17.50 
   1 -13   1  278.77   15.80 
   1  13   1  266.87   14.10 
   1  13   1  271.67   19.10 
   1  13   1  322.67   18.50 
  -1  13  -1  292.77   17.30 
  -1  13  -1  265.07   14.70 
   2 -13   1  171.38   12.90 
  -2 -13  -1  169.98   11.50 
   2  13   1  157.28   14.10 
  -2  13  -1  159.18   12.40 
  -2  13  -1  162.98   11.70 
   2  13   1  166.08   13.60 
   2  13   1  161.08   10.20 
  -3 -13  -1  503.05   22.10 
   3 -13   1  516.75   24.90 
   3 -13   1  512.55   25.70 
  -3 -13  -1  521.35   28.80 
   3  13   1  533.85   21.60 
  -3  13  -1  520.15   24.40 
   3  13   1  557.04   28.70 
   3  13   1  585.94   28.00 
  -3  13  -1  576.74   25.90 
  -4 -13  -1  246.78   19.00 
  -4 -13  -1  226.68   12.60 
   4 -13   1  227.18   15.90 
  -4  13  -1  228.48   15.50 
   4  13   1  255.67   17.70 
   4  13   1  247.88   12.90 
   4  13   1  234.78   12.70 
   5 -13   1   73.59    9.10 
  -5 -13  -1   73.99   12.50 
   5  13   1   88.79   10.60 
   5  13   1   64.19    6.50 
   5  13   1   77.59    6.40 
  -5  13  -1   71.49    8.60 
   6 -13   1   38.20    7.80 
  -6 -13  -1   32.80    8.00 
   6  13   1   27.10    4.40 
   6  13   1   32.00    5.00 
  -6  13  -1   51.89    8.70 
  -7 -13  -1    7.20    4.60 
   7 -13   1   13.50    5.00 
   7  13   1    8.80    2.80 
  -7  13  -1    3.70    3.50 
   7  13   1   10.40    2.90 
  -8 -13  -1    7.20    4.90 
   8 -13   1    6.20    4.90 
  -8  13  -1    3.70    3.90 
   8  13   1   10.40    3.00 
   8  13   1    3.90    2.30 
   9 -13   1   48.00    9.70 
  -9 -13  -1   39.70   10.40 
   9  13   1   44.80    6.30 
  -9  13  -1   41.70    9.50 
   9  13   1   50.19    6.00 
  10 -13   1   27.50    7.80 
 -10 -13  -1   28.50    9.50 
 -10  13  -1   46.00    9.60 
  10  13   1   23.60    4.80 
  10  13   1   30.50    5.40 
 -11 -13  -1   10.00    7.60 
  11 -13   1   15.80    6.70 
  11  13   1   35.40    5.90 
  11  13   1   24.10    4.50 
 -11  13  -1   27.20    8.10 
  12 -13   1   45.80   10.90 
 -12 -13  -1   61.29   14.50 
 -12  13  -1   54.59   11.60 
  12  13   1   68.09    6.40 
 -13 -13  -1   58.89   15.10 
  13 -13   1   71.99   13.90 
 -13  13  -1   69.09   14.00 
  13 -14  -1    4.40    9.80 
 -12 -14   1   34.50   11.70 
  12 -14  -1   30.40    8.70 
 -12  14   1   41.90   10.20 
 -11 -14   1   12.00    7.30 
  11 -14  -1   17.40    6.70 
 -11  14   1   13.30    5.10 
  10 -14  -1   12.70    5.80 
 -10 -14   1   14.10    6.90 
 -10  14   1    7.00    4.40 
  -9 -14   1   -7.10    3.30 
   9 -14  -1    1.30    3.50 
  -9  14   1    6.90    4.10 
   8 -14  -1    3.80    3.40 
  -8 -14   1   -6.30    3.10 
  -8  14   1    4.90    3.40 
   7 -14  -1   64.39   11.00 
  -7 -14   1   62.89   12.30 
  -7  14   1   67.99    8.80 
   6 -14  -1  360.66   22.90 
  -6 -14   1  355.76   25.80 
   6  14  -1  367.76   12.30 
   6  14  -1  382.26   24.20 
  -6  14   1  366.26   21.40 
   5 -14  -1  503.85   27.70 
  -5 -14   1  604.84   32.50 
  -5  14   1  524.35   26.50 
   5  14  -1  536.05   17.90 
   5  14  -1  525.65   18.50 
   5  14  -1  571.54   29.50 
   4 -14  -1   -0.90    2.00 
  -4 -14   1   -2.30    1.10 
  -4 -14   1    1.10    2.40 
  -4  14   1    2.30    2.40 
   4  14  -1    1.40    1.30 
   4  14  -1   -0.60    2.30 
  -3 -14   1   19.90    6.30 
   3 -14  -1   18.40    5.30 
  -3 -14   1   20.90    3.90 
  -3  14   1   14.10    4.40 
   3  14  -1   16.00    3.20 
   3  14  -1   17.90    5.20 
  -3  14   1   18.90    4.80 
   2 -14  -1  414.56   22.00 
  -2 -14   1  395.46   18.30 
   2 -14  -1  403.36   22.50 
  -2  14   1  406.86   21.70 
   2  14  -1  384.56   25.30 
   2  14  -1  388.76   22.20 
  -2  14   1  403.56   19.70 
   2  14  -1  376.66   16.40 
   1 -14  -1  137.29   12.00 
  -1 -14   1  129.39   10.00 
   1 -14  -1  118.99   11.10 
  -1 -14   1  127.79   11.60 
   1  14  -1  139.99   12.20 
  -1  14   1  122.39   11.40 
   1  14  -1  140.59   13.70 
  -1  14   1  128.49   13.30 
   1  14  -1  125.19    8.90 
  -1  14   1  127.69   10.40 
   0 -14  -1   -0.80    2.10 
   0 -14  -1    7.00    3.30 
   0 -14   1    5.20    2.90 
   0  14  -1    8.10    3.00 
   0  14   1    2.90    3.40 
   0  14   1    5.00    2.90 
   0  14  -1    0.50    2.70 
   0  14  -1    8.20    3.30 
  -1 -14  -1   34.70    6.20 
   1 -14   1   44.20    7.50 
   1 -14   1   45.50    6.10 
  -1  14  -1   38.00    6.20 
   1  14   1   37.60    7.20 
   1  14   1   28.10    5.30 
  -1  14  -1   41.20    8.20 
   1  14   1   37.50    7.90 
  -1  14  -1   38.30    7.40 
   2 -14   1  214.28   14.60 
  -2 -14  -1  229.68   14.10 
  -2  14  -1  227.98   15.70 
   2  14   1  223.68   12.80 
  -2  14  -1  228.98   14.30 
   2  14   1  234.38   16.70 
   3 -14   1  124.69   11.20 
  -3 -14  -1  100.19   11.70 
  -3 -14  -1  115.49    9.40 
   3  14   1  111.19   11.40 
  -3  14  -1  100.59   10.00 
  -3  14  -1  116.79   10.80 
   3  14   1   99.19    8.10 
  -4 -14  -1   89.19    7.90 
  -4 -14  -1   91.89   11.70 
   4 -14   1   83.49    9.60 
   4  14   1   81.29   10.40 
   4  14   1   94.79    7.80 
   4  14   1   84.79    7.60 
  -4  14  -1   80.29    9.30 
   5 -14   1  257.17   17.90 
  -5 -14  -1  257.57   20.60 
   5  14   1  285.67   19.90 
  -5  14  -1  258.47   17.30 
   5  14   1  252.87   13.30 
   5  14   1  219.88   12.30 
  -6 -14  -1   15.20    5.30 
   6 -14   1   22.10    6.20 
   6  14   1    6.70    3.00 
   6  14   1   12.20    2.90 
  -6  14  -1   12.70    4.80 
   6  14   1   15.00    5.30 
  -7 -14  -1    5.60    4.10 
   7 -14   1   -1.10    2.00 
   7  14   1   -1.70    1.40 
  -7  14  -1   -3.50    2.00 
   7  14   1    2.80    2.30 
   8 -14   1    6.60    3.70 
   8  14   1    2.20    2.40 
   8  14   1    2.70    2.50 
  -8  14  -1    3.50    5.40 
   9 -14   1   29.70    7.70 
  -9 -14  -1   35.80    9.90 
   9  14   1   17.20    4.20 
   9  14   1   18.40    3.90 
  -9  14  -1   18.10    5.80 
 -10 -14  -1  290.67   26.50 
  10 -14   1  279.27   22.50 
  10  14   1  291.87   14.10 
  10  14   1  280.07   15.00 
 -10  14  -1  261.77   21.00 
  11 -14   1    6.50    5.00 
 -11 -14  -1   -2.20    6.30 
 -11  14  -1    2.70    4.80 
  11  14   1    4.70    2.90 
  12 -14   1   17.80    7.40 
 -12 -14  -1   -1.10    8.20 
 -12  14  -1   17.40    7.40 
  12  14   1   15.60    5.60 
  13 -14   1   38.50   10.90 
 -13 -14  -1   12.90    9.90 
 -13  14  -1   21.50    8.90 
 -13 -15   1    2.60    7.60 
  13 -15  -1   12.80    7.20 
 -13  15   1   -0.40    5.30 
 -12 -15   1  207.48   24.40 
  12 -15  -1  173.18   19.60 
 -12  15   1  194.08   19.00 
 -11 -15   1  739.13   45.70 
  11 -15  -1  743.63   41.90 
 -11  15   1  765.22   39.40 
 -10 -15   1  488.55   35.20 
  10 -15  -1  535.75   33.10 
 -10  15   1  495.45   29.40 
  -9 -15   1  109.69   17.80 
   9 -15  -1  114.59   14.00 
  -9  15   1  119.99   13.00 
  -8 -15   1   27.60    9.20 
   8 -15  -1   35.10    9.00 
  -8  15   1   29.30    8.00 
  -7 -15   1   67.09   13.10 
   7 -15  -1   72.09   11.90 
  -7  15   1   82.19   10.00 
   7  15  -1   65.19   11.40 
  -6 -15   1   45.80   10.20 
   6 -15  -1   45.10    9.10 
   6  15  -1   50.29    9.80 
   6  15  -1   46.40    3.60 
   6  15  -1   49.20    3.60 
  -6  15   1   42.30    8.40 
  -5 -15   1   63.29   12.10 
  -5 -15   1   71.09    5.60 
   5 -15  -1   88.69   11.00 
   5  15  -1   73.49    5.60 
  -5  15   1   94.89   10.30 
   5  15  -1   62.29   10.90 
   4 -15  -1   -2.20    2.10 
  -4 -15   1   -0.10    1.70 
  -4 -15   1    5.90    4.10 
  -4  15   1    5.50    3.20 
   4  15  -1    4.30    3.40 
   4  15  -1    1.10    1.40 
   3 -15  -1   22.70    6.00 
  -3 -15   1   19.60    4.10 
   3  15  -1   21.70    3.70 
  -3  15   1   25.70    5.90 
   3  15  -1   25.50    5.90 
  -2 -15   1   40.20    6.20 
   2 -15  -1   36.00    7.00 
  -2  15   1   38.80    7.20 
   2  15  -1   36.60    4.80 
   2  15  -1   38.00    7.40 
  -2  15   1   34.70    5.90 
  -1 -15   1  744.73   30.50 
   1 -15  -1  806.12   34.10 
   1  15  -1  788.92   28.90 
  -1  15   1  832.62   35.10 
   1  15  -1  797.32   34.90 
  -1  15   1  753.82   30.40 
   0 -15   1 1107.79   40.40 
   0 -15  -1 1125.69   42.20 
   0  15   1 1117.69   39.00 
   0  15  -1 1098.29   43.30 
   0  15  -1 1068.49   38.10 
   0  15   1 1094.79   43.70 
   1 -15   1 1032.60   39.70 
  -1 -15  -1 1038.30   39.70 
  -1  15  -1 1062.09   41.90 
  -1  15  -1 1020.30   37.70 
   1  15   1 1071.39   42.90 
   1  15   1 1060.39   36.90 
  -2 -15  -1  189.78   13.00 
   2 -15   1  186.28   14.10 
  -2  15  -1  176.38   14.00 
   2  15   1  181.58   14.80 
   2  15   1  154.08   10.80 
  -2  15  -1  165.98   12.40 
  -3 -15  -1  131.69   10.60 
   3 -15   1  156.88   13.20 
  -3 -15  -1  163.68   15.80 
  -3  15  -1  148.89   12.90 
   3  15   1  160.88   14.40 
   3  15   1  159.28   10.30 
  -4 -15  -1  621.74   25.50 
   4 -15   1  661.53   31.00 
  -4 -15  -1  635.34   34.90 
   4  15   1  583.84   25.00 
  -4  15  -1  628.94   30.00 
   4  15   1  652.23   24.90 
   4  15   1  653.53   32.80 
   5 -15   1 1155.98   45.90 
  -5 -15  -1 1148.29   51.29 
   5  15   1 1138.59   37.60 
  -5  15  -1 1163.68   45.10 
   5  15   1  945.91   36.00 
   5  15   1 1150.48   48.00 
  -6 -15  -1  226.08   20.10 
   6 -15   1  207.98   17.00 
   6  15   1  190.88   10.90 
  -6  15  -1  197.78   15.70 
   6  15   1  226.48   18.70 
   6  15   1  212.28   12.20 
   7 -15   1    5.00    4.40 
   7  15   1    5.50    2.90 
  -7  15  -1    3.10    3.80 
   7  15   1    8.40    2.30 
   8 -15   1  121.69   13.90 
  -8 -15  -1  139.59   16.80 
   8  15   1  127.39    9.20 
  -8  15  -1  140.59   13.60 
   8  15   1  107.49    8.20 
   9 -15   1   -3.90    2.90 
  -9 -15  -1    1.50    5.40 
   9  15   1    1.60    2.60 
  -9  15  -1    8.30    4.50 
   9  15   1    6.10    3.10 
 -10 -15  -1  105.49   19.30 
  10 -15   1  114.69   15.10 
  10  15   1  100.39    8.60 
 -10  15  -1  107.09   13.10 
  10  15   1  107.19    8.00 
  11 -15   1  203.28   20.30 
 -11 -15  -1  151.28   24.00 
  11  15   1  191.68   10.20 
 -11  15  -1  149.59   16.70 
 -12 -15  -1    2.00    8.80 
  12 -15   1   -2.10    5.00 
 -12  15  -1    1.70    6.40 
  13 -16  -1   -3.70    5.60 
 -13 -16   1  -10.40    5.90 
 -13  16   1   -0.10    4.70 
  12 -16  -1   20.50   10.40 
 -11 -16   1  249.28   25.50 
  11 -16  -1  189.48   20.50 
 -11  16   1  199.38   19.00 
 -10 -16   1  224.08   24.30 
  10 -16  -1  267.27   23.10 
 -10  16   1  245.78   19.90 
   9 -16  -1   59.49   11.20 
  -9 -16   1   80.59   15.20 
  -9  16   1   81.79   10.80 
  -8 -16   1    7.80    6.00 
   8 -16  -1   15.50    6.20 
   8  16  -1    6.40    4.30 
  -8  16   1    4.40    4.40 
  -7 -16   1  563.24   36.60 
   7 -16  -1  653.93   35.10 
   7  16  -1  634.24   35.70 
  -7  16   1  673.23   33.10 
  -6 -16   1 2308.67   87.59 
   6 -16  -1 2452.05   83.69 
   6  16  -1 2336.47   64.79 
   6  16  -1 2434.86   64.69 
   6  16  -1 2395.06   84.09 
  -6  16   1 2360.86   79.49 
   5 -16  -1 1794.32   65.79 
  -5 -16   1 1814.62   70.59 
  -5 -16   1 1750.22   51.79 
   5  16  -1 1535.25   50.79 
   5  16  -1 1783.62   66.39 
  -5  16   1 1845.82   63.99 
   5  16  -1 1831.22   50.59 
   4 -16  -1  750.72   35.70 
  -4 -16   1  736.43   27.50 
  -4 -16   1  757.92   39.30 
   4  16  -1  756.52   25.70 
   4  16  -1  746.93   36.10 
  -4  16   1  770.42   34.50 
  -3 -16   1    4.50    2.70 
   3 -16  -1    0.90    3.00 
  -3  16   1    5.40    3.40 
   3  16  -1    1.80    3.30 
   3  16  -1    2.50    2.00 
  -2 -16   1  258.67   15.20 
   2 -16  -1  252.27   17.80 
   2  16  -1  261.27   18.40 
   2  16  -1  259.27   13.40 
  -2  16   1  234.28   17.20 
  -2  16   1  256.47   24.80 
   1 -16  -1 1017.00   41.20 
  -1 -16   1 1032.70   38.50 
  -1  16   1  978.50   37.30 
   1  16  -1 1043.00   42.60 
   1  16  -1  998.40   35.50 
  -1  16   1 1017.50   41.80 
   0 -16  -1   13.70    4.90 
   0 -16   1   12.90    5.50 
   0  16   1   17.00    4.60 
   0  16  -1   24.70    6.90 
   0  16  -1   13.20    5.00 
   0  16   1   31.00    6.70 
   1 -16   1    8.40    3.70 
  -1 -16  -1    4.40    3.30 
   1  16   1    1.20    3.00 
   1  16   1   -0.30    2.20 
  -1  16  -1    2.30    2.80 
  -1  16  -1    6.10    3.30 
  -2 -16  -1    6.50    3.20 
   2 -16   1   -0.40    2.10 
  -2  16  -1    7.00    3.90 
   2  16   1    5.60    3.90 
   2  16   1    5.50    2.80 
  -3 -16  -1   58.49    7.00 
   3 -16   1   65.59   10.20 
  -3  16  -1   59.79    9.40 
   3  16   1   64.09   10.50 
   3  16   1   50.39    6.00 
  -4 -16  -1 1140.19   39.50 
  -4 -16  -1 1155.38   51.59 
   4 -16   1 1134.39   45.50 
  -4  16  -1 1151.98   45.20 
   4  16   1  924.81   37.70 
   4  16   1 1125.19   37.90 
   4  16   1 1189.38   48.50 
   5 -16   1 1798.02   64.39 
  -5 -16  -1 1761.22   70.39 
   5  16   1 1824.42   67.19 
   5  16   1 1823.82   54.49 
  -5  16  -1 1799.12   62.89 
   5  16   1 1529.25   53.19 
   6 -16   1  831.42   38.40 
  -6 -16  -1  753.62   41.90 
   6  16   1  755.72   38.90 
   6  16   1  672.43   26.70 
   6  16   1  795.92   28.60 
  -6  16  -1  865.41   37.30 
   7 -16   1  229.58   19.00 
  -7 -16  -1  186.18   20.00 
   7  16   1  223.48   11.60 
   7  16   1  219.78   12.30 
   7  16   1  210.38   19.30 
  -7  16  -1  230.58   17.70 
  -8 -16  -1  305.37   26.30 
   8 -16   1  329.07   23.90 
   8  16   1  312.97   14.60 
   8  16   1  298.07   14.70 
  -8  16  -1  297.07   21.30 
  -9 -16  -1  981.80   53.29 
   9 -16   1 1066.89   49.00 
   9  16   1 1032.70   33.60 
   9  16   1  999.70   34.00 
  -9  16  -1 1007.00   45.70 
  10 -16   1 1004.00   49.80 
 -10 -16  -1 1057.39   56.29 
  10  16   1 1041.30   32.80 
 -10  16  -1  952.60   46.50 
 -11 -16  -1  136.19   22.10 
  11 -16   1  174.98   19.20 
 -11  16  -1  170.48   18.00 
 -12 -16  -1   10.90    8.10 
  12 -16   1    9.10    6.50 
 -12  16  -1    1.10    5.20 
 -12 -17   1  618.84   44.50 
  12 -17  -1  681.63   42.00 
 -12  17   1  652.03   38.00 
 -11 -17   1 1062.79   59.79 
  11 -17  -1 1190.08   57.59 
 -11  17   1 1202.38   53.39 
  10 -17  -1  639.14   38.40 
 -10 -17   1  635.04   42.40 
 -10  17   1  622.64   35.20 
   9 -17  -1  239.78   21.50 
  -9 -17   1  222.38   23.60 
  -9  17   1  219.38   18.60 
   9  17  -1  226.68   21.30 
  -8 -17   1   62.09   13.10 
   8 -17  -1   70.79   12.60 
  -8  17   1   82.49   10.90 
   8  17  -1   71.59   12.70 
  -7 -17   1   13.40    7.00 
   7 -17  -1   17.70    6.20 
  -7  17   1   12.40    5.40 
   7  17  -1    7.00    5.00 
  -6 -17   1   48.00   11.50 
   6 -17  -1   26.60    7.70 
  -6  17   1   22.90    6.70 
   6  17  -1   21.90    3.10 
   6  17  -1   18.10    2.80 
   6  17  -1   20.40    6.80 
   5 -17  -1  183.48   17.00 
  -5 -17   1  176.18   18.70 
  -5 -17   1  174.28   10.00 
   5  17  -1  179.08    9.40 
   5  17  -1  170.18   16.60 
   5  17  -1  156.38    9.50 
  -5  17   1  185.58   15.60 
  -4 -17   1   36.90    9.50 
   4 -17  -1   28.60    7.40 
  -4 -17   1   37.80    5.10 
   4  17  -1   29.70    7.70 
   4  17  -1   38.00    4.80 
  -4  17   1   35.70    7.60 
   3 -17  -1   28.80    6.90 
  -3 -17   1   25.90    4.90 
   3  17  -1   26.60    4.70 
  -3  17   1   23.00    6.10 
   3  17  -1   24.60    6.80 
   2 -17  -1  930.21   40.30 
  -2 -17   1  944.31   36.00 
   2  17  -1  936.91   33.10 
   2  17  -1  929.11   41.30 
  -2  17   1  926.11   40.10 
  -1 -17   1 4248.17  120.79 
   1 -17  -1 4155.28  124.39 
   1  17  -1 4015.60  116.29 
  -1  17   1 4209.58  125.79 
   1  17  -1 4162.18  126.09 
  -1  17   1 4041.10  118.89 
   0 -17   1 3949.10  116.99 
   0 -17  -1 3922.41  118.79 
   0  17   1 4009.60  121.49 
   0  17   1 3859.61  113.69 
   0  17  -1 4097.69  121.69 
   0  17  -1 3975.90  113.79 
   1 -17   1  948.71   39.00 
  -1 -17  -1  996.90   39.90 
   1  17   1  941.41   35.20 
  -1  17  -1  910.41   36.30 
  -1  17  -1 1014.30   41.80 
   1  17   1  928.91   41.40 
   2 -17   1  453.85   24.60 
  -2 -17  -1  466.75   23.60 
  -2  17  -1  433.56   24.90 
   2  17   1  427.16   25.80 
   2  17   1  461.85   20.90 
   3 -17   1  159.58   14.40 
  -3 -17  -1  162.58   12.30 
   3  17   1  160.88   11.00 
   3  17   1  201.78   16.90 
  -3  17  -1  163.18   14.40 
  -4 -17  -1  964.80   35.70 
   4 -17   1 1006.60   42.40 
  -4 -17  -1  997.30   47.50 
  -4  17  -1 1000.60   41.70 
   4  17   1  783.32   33.90 
   4  17   1  958.00   43.90 
   4  17   1  978.20   34.00 
  -5 -17  -1  536.95   33.50 
   5 -17   1  510.85   28.70 
   5  17   1  519.45   21.40 
  -5  17  -1  486.15   27.10 
   5  17   1  431.76   20.70 
   5  17   1  526.35   30.80 
   6 -17   1   66.59   14.30 
   6  17   1   63.09    6.60 
   6  17   1   80.79    7.10 
  -6  17  -1   73.59   18.70 
   7 -17   1   59.79   10.90 
  -7 -17  -1   96.69   15.70 
   7  17   1   57.09   11.40 
   7  17   1   44.00    5.20 
  -7  17  -1   63.99   10.90 
   7  17   1   74.79    6.70 
  -8 -17  -1   91.19   16.40 
   8 -17   1   75.49   13.20 
  -8  17  -1   78.29   10.20 
   8  17   1   68.89    6.50 
   8  17   1   66.99    6.40 
   8  17   1   46.60   10.80 
   9 -17   1  278.47   23.50 
  -9 -17  -1  299.07   27.50 
  -9  17  -1  265.97   21.60 
   9  17   1  302.17   13.90 
   9  17   1  299.37   25.10 
   9  17   1  314.77   13.90 
  10 -17   1  867.21   45.90 
 -10 -17  -1  801.82   49.50 
  10  17   1  892.41   27.90 
 -10  17  -1  877.91   43.50 
  11 -17   1  366.56   37.10 
 -11 -17  -1  522.65   58.69 
  12 -17   1  110.69   18.50 
 -12 -17  -1  114.69   20.20 
 -12  17  -1  110.49   17.20 
 -12 -18   1   99.79   19.00 
  12 -18  -1   93.99   17.60 
 -12  18   1  118.29   14.80 
 -11 -18   1  534.75   59.09 
  11 -18  -1  470.95   42.20 
 -11  18   1  465.85   45.90 
  10 -18  -1  391.36   30.80 
 -10 -18   1  426.46   34.60 
  10  18  -1  476.25   33.20 
 -10  18   1  421.36   28.20 
   9 -18  -1   73.99   13.30 
  -9 -18   1   69.39   13.60 
  -9  18   1   86.79   11.50 
   9  18  -1   55.19   12.00 
   8 -18  -1  316.37   25.10 
  -8 -18   1  302.27   26.50 
  -8  18   1  284.27   21.50 
   8  18  -1  316.87   25.20 
  -7 -18   1  913.11   49.80 
   7 -18  -1  912.31   45.70 
  -7  18   1  936.01   42.50 
   7  18  -1 1003.60   47.70 
  -6 -18   1 1191.48   55.19 
   6  18  -1  939.01   32.00 
   6  18  -1 1120.59   50.39 
  -6  18   1 1128.69   46.80 
   5 -18  -1 2507.85   84.29 
  -5 -18   1 2286.47   67.59 
  -5 -18   1 2325.87   87.99 
   5  18  -1 2357.46   66.09 
   5  18  -1 2122.99   66.99 
  -5  18   1 2399.06   80.19 
   5  18  -1 2293.07   82.99 
   4 -18  -1  716.03   36.50 
  -4 -18   1  721.93   28.50 
  -4  18   1  759.82   35.60 
   4  18  -1  760.12   26.70 
   4  18  -1  737.73   37.50 
  -3 -18   1  211.78   13.70 
   3 -18  -1  203.28   17.20 
   3  18  -1  210.18   12.10 
   3  18  -1  227.88   18.80 
  -3  18   1  222.98   17.40 
  -2 -18   1  166.28   12.80 
   2 -18  -1  161.28   14.80 
  -2  18   1  181.48   15.50 
   2  18  -1  158.08   15.00 
   2  18  -1  160.68   11.10 
   1 -18  -1   -2.90    3.90 
  -1 -18   1    5.40    3.80 
   1  18  -1   10.30    3.90 
  -1  18   1    8.70    5.20 
   1  18  -1    2.90    3.80 
   0 -18  -1    0.20    3.60 
   0 -18   1    5.90    3.80 
   0  18   1    2.20    3.30 
   0  18   1    1.60    2.50 
   0  18  -1    0.70    3.20 
   0  18  -1   -0.60    3.20 
   1 -18   1   -0.70    2.40 
  -1 -18  -1   -0.50    2.80 
   1  18   1   -2.80    2.00 
   1  18   1    0.40    2.20 
  -1  18  -1    5.10    4.00 
   2 -18   1    5.30    4.00 
  -2 -18  -1   -2.90    4.10 
   2  18   1    6.20    3.00 
   2  18   1    5.60    3.60 
  -2  18  -1    4.20    3.50 
   3 -18   1  202.68   16.70 
  -3 -18  -1  193.48   14.10 
   3  18   1  205.48   18.00 
   3  18   1  218.68   12.90 
  -3  18  -1  221.58   17.20 
   4 -18   1 1188.28   48.80 
  -4 -18  -1 1162.88   41.70 
   4  18   1 1143.49   50.39 
   4  18   1 1159.68   39.50 
   4  18   1 1030.10   40.50 
  -4  18  -1 1204.58   48.10 
   5 -18   1 1384.56   54.79 
  -5 -18  -1 1314.87   87.19 
  -5 -18  -1 1334.27   44.60 
   5  18   1 1354.16   43.60 
   5  18   1 1199.08   43.50 
   6 -18   1  878.41   42.80 
  -6 -18  -1  957.80   49.70 
   6  18   1  865.11   31.50 
   6  18   1  910.41   31.90 
   6  18   1  914.31   45.30 
  -6  18  -1  925.31   41.60 
  -7 -18  -1  815.42   46.60 
   7 -18   1  825.32   42.00 
   7  18   1  823.02   28.70 
   7  18   1  794.72   42.80 
   7  18   1  721.43   27.40 
  -7  18  -1  834.32   39.40 
   8 -18   1  229.58   20.50 
  -8 -18  -1  208.68   21.80 
   8  18   1  214.18   11.60 
   8  18   1  213.58   11.60 
  -8  18  -1  212.38   18.40 
   8  18   1  230.58   21.70 
  -9 -18  -1  327.27   29.00 
   9 -18   1  276.27   23.70 
   9  18   1  284.37   13.20 
   9  18   1  311.57   26.00 
  -9  18  -1  319.07   23.80 
 -10 -18  -1  628.64   44.00 
  10 -18   1  622.44   38.60 
 -10  18  -1  611.24   35.80 
  11 -18   1  305.57   26.50 
 -11 -18  -1  313.07   30.60 
 -11  18  -1  266.27   24.40 
  11 -19  -1  128.79   19.90 
 -11 -19   1  116.39   20.70 
  11  19  -1  122.69   19.60 
 -11  19   1  152.68   17.70 
  10 -19  -1  184.38   20.70 
 -10 -19   1  214.68   24.00 
 -10  19   1  175.68   19.00 
  10  19  -1  157.88   19.10 
  -9 -19   1  230.58   23.80 
   9 -19  -1  202.68   21.20 
   9  19  -1  211.38   20.70 
  -9  19   1  207.98   18.70 
   8 -19  -1   39.20   10.30 
  -8 -19   1   27.90   10.60 
  -8  19   1   25.60    7.20 
   8  19  -1   19.80    7.80 
  -7 -19   1    2.70    4.30 
   7 -19  -1    3.40    4.20 
  -7  19   1    1.30    3.70 
   7  19  -1    0.00    4.20 
  -6 -19   1   20.10    7.70 
   6 -19  -1   24.90    7.80 
   6  19  -1   21.30    3.30 
  -6  19   1   30.90    8.00 
   6  19  -1   35.50    4.40 
   6  19  -1   27.80    8.40 
  -5 -19   1   80.09    7.20 
  -5 -19   1   75.29   14.80 
   5 -19  -1   52.89   11.70 
  -5  19   1   84.39   13.00 
   5  19  -1   77.59    6.70 
   5  19  -1   76.59    7.20 
   5  19  -1   87.49   14.30 
   4 -19  -1   70.79   11.80 
  -4 -19   1   87.59    8.30 
   4  19  -1   82.49    7.20 
  -4  19   1   91.29   16.20 
   4  19  -1   76.39   15.30 
   3 -19  -1  197.58   17.30 
  -3 -19   1  193.18   13.70 
   3  19  -1  216.68   12.60 
   3  19  -1  203.98   18.10 
  -3  19   1  189.08   16.60 
  -2 -19   1  111.59   13.60 
   2 -19  -1  113.79   13.60 
   2  19  -1  156.98   16.30 
   2  19  -1  135.39   14.30 
  -2  19   1  136.79   13.80 
   1 -19  -1  915.11   40.40 
  -1 -19   1  886.51   37.10 
  -1  19   1  928.81   41.50 
   1  19  -1  811.42   33.40 
   1  19  -1  891.61   41.50 
   0 -19  -1 1328.57   51.19 
   0 -19   1 1254.07   48.90 
   0  19   1 1294.47   52.69 
   0  19  -1 1270.57   52.39 
  -1 -19  -1  392.56   23.10 
   1 -19   1  384.56   22.90 
   1  19   1  384.96   19.90 
   1  19   1  361.06   24.40 
  -1  19  -1  400.46   24.80 
  -2 -19  -1  331.57   20.20 
   2 -19   1  336.97   21.90 
   2  19   1  323.67   17.30 
   2  19   1  331.27   23.60 
  -2  19  -1  327.67   22.30 
   3 -19   1  258.17   19.30 
   3  19   1  266.37   15.20 
   3  19   1  254.47   21.00 
  -3  19  -1  249.18   18.90 
  -4 -19  -1  156.28   12.30 
   4 -19   1  144.99   15.20 
  -4  19  -1  137.69   15.30 
   4  19   1  169.98   11.10 
   4  19   1  128.99   11.30 
   4  19   1  128.89   16.40 
  -5 -19  -1   70.19    7.80 
   5 -19   1   84.89   16.50 
  -5 -19  -1   77.09   14.90 
   5  19   1   75.89    7.70 
  -5  19  -1   87.39   11.20 
   5  19   1   87.89   14.70 
   5  19   1   81.59    8.00 
   6 -19   1   46.20   10.60 
  -6 -19  -1   52.19   12.30 
   6  19   1   58.29    6.40 
   6  19   1   57.49    6.50 
  -6  19  -1   42.20    9.20 
   6  19   1   60.49   11.80 
  -7 -19  -1   68.39   13.80 
   7 -19   1   67.29   11.90 
   7  19   1   65.09   12.80 
  -7  19  -1   62.49   11.20 
   7  19   1   79.29    7.00 
   7  19   1   82.59    7.10 
   8 -19   1   25.90    8.30 
  -8 -19  -1   20.60    9.80 
   8  19   1   17.90    8.10 
   8  19   1   22.80    4.20 
   8  19   1   27.50    4.30 
  -8  19  -1   18.90    7.30 
   9 -19   1  195.28   20.30 
  -9 -19  -1  135.69   22.80 
  -9  19  -1  195.08   18.90 
   9  19   1  179.08   20.50 
   9  19   1  191.68    9.70 
  10 -19   1  280.37   27.40 
 -10 -19  -1  313.57   54.89 
 -11 -19  -1  182.18   23.20 
  11 -19   1  197.18   21.80 
  11  19   1  184.78   21.00 
 -11  19  -1  158.68   18.50 
  11 -20  -1   38.20   12.20 
  11  20  -1   58.89   13.30 
 -11  20   1   55.59   11.40 
  10 -20  -1   -9.00    9.30 
  -9 -20   1   31.50    9.70 
   9 -20  -1   10.00    6.90 
  -9  20   1    4.10    4.80 
   9  20  -1   12.00    7.90 
   8 -20  -1   50.59   11.40 
  -8 -20   1   31.30    9.90 
  -8  20   1   41.10    9.30 
   8  20  -1   37.20   11.40 
  -7 -20   1   53.39   12.60 
   7 -20  -1   64.89   13.20 
   7  20  -1   47.60   10.80 
  -7  20   1   74.19   12.20 
   6 -20  -1  117.59   14.80 
  -6 -20   1  110.69   17.60 
   6  20  -1   86.39   15.00 
   6  20  -1  110.69    7.50 
   6  20  -1   83.89    6.20 
  -6  20   1   89.19   11.60 
  -5 -20   1   -4.60    2.60 
   5 -20  -1    0.30    3.80 
   5  20  -1   -5.40    2.10 
  -5  20   1    5.90    5.30 
   5  20  -1    6.50    2.90 
   5  20  -1   -8.10    3.30 
  -4 -20   1  175.28   12.50 
   4 -20  -1  167.28   16.60 
   4  20  -1  171.28   17.20 
   4  20  -1  170.88   11.00 
  -4  20   1  173.28   16.30 
   3 -20  -1   13.20    5.60 
  -3 -20   1    7.70    4.20 
   3  20  -1   11.70    5.90 
  -3  20   1   19.50    6.20 
   3  20  -1   13.60    3.90 
  -2 -20   1   75.09   10.50 
   2 -20  -1   83.19   13.10 
   2  20  -1   81.89    8.40 
  -2  20   1   87.49   20.70 
  -1 -20   1   31.70    7.10 
   1 -20  -1   46.10    9.30 
   1  20  -1   54.79    7.30 
   1  20  -1   46.80    9.60 
  -1  20   1   52.09   10.80 
   0 -20  -1  107.99   12.50 
   0 -20   1  108.49   12.20 
   0  20   1  122.19   13.50 
   0  20  -1  108.29   13.00 
  -1 -20  -1    4.20    4.10 
   1 -20   1    9.10    3.60 
  -1  20  -1    5.80    4.70 
   1  20   1   -4.20    3.80 
  -2 -20  -1   28.70    6.30 
   2 -20   1   27.00    7.30 
   2  20   1   28.70    5.30 
  -2  20  -1    8.20    6.50 
  -3 -20  -1  123.99   11.60 
   3 -20   1  114.19   13.00 
   3  20   1  104.19    9.30 
   3  20   1  130.29   14.70 
  -3  20  -1  126.19   13.40 
  -4 -20  -1   38.50    9.20 
   4 -20   1   38.80    8.90 
   4  20   1   36.30    8.10 
   4  20   1   48.70   10.20 
  -4  20  -1   45.40    9.10 
  -5 -20  -1   99.39    9.20 
   5 -20   1   71.29   12.50 
   5  20   1   93.49    8.40 
   5  20   1  107.69    9.10 
   5  20   1   85.39   14.50 
  -5  20  -1   98.59   12.20 
   6 -20   1  112.09   14.20 
  -6 -20  -1  126.99   20.00 
   6  20   1  130.99    9.30 
   6  20   1  127.19    9.70 
   6  20   1   91.29   15.20 
  -6  20  -1  119.19   13.40 
  -7 -20  -1   98.89   17.30 
   7 -20   1  143.39   15.80 
   7  20   1  113.79    8.40 
   7  20   1   93.69   15.70 
   7  20   1  103.29    8.00 
  -7  20  -1  102.29   13.30 
   8 -20   1    2.10    4.90 
  -8 -20  -1    2.80    6.90 
   8  20   1   13.10    6.70 
   8  20   1    3.40    2.70 
  -8  20  -1    3.80    4.90 
  -9 -20  -1   67.89   15.40 
   9 -20   1   50.29   11.10 
   9  20   1   43.40   12.60 
  -9  20  -1   35.70   10.30 
 -10 -20  -1   34.10   12.30 
  10 -20   1   30.90   10.50 
 -10  20  -1   23.30    8.60 
  10  20   1   30.80    9.90 
 -10 -21   1   23.20   10.30 
  10 -21  -1   34.00   10.50 
  10  21  -1   15.80    8.50 
 -10  21   1   25.20    8.70 
  -9 -21   1   30.00   10.40 
   9 -21  -1   12.50    6.70 
  -9  21   1   17.60    6.90 
   9  21  -1   16.60    8.90 
  -8 -21   1    3.30    5.50 
   8 -21  -1    1.50    4.40 
   8  21  -1   -2.30    3.70 
  -8  21   1    3.50    3.70 
  -7 -21   1  104.29   18.10 
   7 -21  -1   85.19   14.80 
   7  21  -1  110.99   17.50 
  -7  21   1   98.19   15.30 
   6 -21  -1  175.58   19.10 
  -6 -21   1  248.78   24.00 
   6  21  -1  195.28   19.90 
   6  21  -1  206.98   10.70 
   6  21  -1  229.98   11.20 
  -6  21   1  221.58   19.20 
  -5 -21   1   29.40    5.40 
   5 -21  -1   41.80    9.50 
   5  21  -1   26.80    7.50 
   5  21  -1   30.80    5.10 
  -5  21   1   24.40    7.70 
   5  21  -1   32.30    5.60 
   4 -21  -1   50.49   10.30 
  -4 -21   1   47.20    7.60 
  -4  21   1   36.30    9.20 
   4  21  -1   44.90   10.00 
   4  21  -1   42.20    6.40 
   3 -21  -1    8.90    5.30 
  -3 -21   1    9.70    4.80 
   3  21  -1    9.20    3.80 
   3  21  -1    3.20    4.60 
  -3  21   1   -0.30    3.20 
   2 -21  -1   12.70    6.30 
  -2 -21   1    8.40    4.70 
  -2  21   1   13.60    5.40 
   2  21  -1   11.90    4.10 
   2  21  -1   12.90    6.70 
  -1 -21   1  319.37   20.90 
   1 -21  -1  359.46   23.80 
   1  21  -1  326.37   24.10 
  -1  21   1  339.77   24.20 
   0 -21  -1  630.24   32.60 
   0 -21   1  593.74   31.50 
   0  21   1  653.63   35.40 
   0  21  -1  643.44   34.80 
  -1 -21  -1   -0.40    3.70 
   1 -21   1   -2.00    2.80 
   1  21   1   10.30    4.80 
  -1  21  -1    4.30    3.80 
  -2 -21  -1   10.50    5.10 
   2 -21   1    7.50    5.00 
   2  21   1    0.10    3.90 
  -2  21  -1    9.20    5.40 
   3 -21   1  109.19   12.50 
  -3 -21  -1  105.59   11.40 
  -3  21  -1  129.79   14.00 
   3  21   1  137.99   11.00 
   3  21   1  102.39   13.70 
   4 -21   1  211.98   19.90 
  -4 -21  -1  247.38   16.60 
   4  21   1  251.67   16.60 
  -4  21  -1  258.17   20.40 
   4  21   1  283.87   23.10 
   4  21   1  246.18   15.10 
   5 -21   1  113.29   14.00 
  -5 -21  -1  127.49   11.00 
   5  21   1  120.29   15.30 
  -5  21  -1  111.59   13.00 
   5  21   1  118.49   11.10 
   5  21   1   80.99   10.90 
   6 -21   1    6.30    4.90 
  -6 -21  -1   -0.70    5.30 
   6  21   1    2.80    4.40 
   6  21   1    4.40    2.60 
   6  21   1   -2.00    2.90 
  -6  21  -1    0.70    3.50 
   7 -21   1    8.10    6.10 
  -7 -21  -1    3.10    6.30 
  -7  21  -1   16.10    6.40 
   7  21   1   12.00    7.20 
   7  21   1    3.90    2.90 
  -8 -21  -1    6.50    8.00 
   8 -21   1   -5.20    5.10 
  -8  21  -1   15.70    6.20 
   8  21   1    9.40    5.30 
   8  21   1   10.90    3.10 
  -9 -21  -1    3.20    7.00 
   9 -21   1   10.60    7.40 
  -9  21  -1    1.00    5.80 
   9  21   1   -0.40    6.30 
 -10 -21  -1   83.29   20.30 
  10 -21   1  112.09   18.60 
 -10  21  -1   75.29   13.50 
  10  21   1   78.59   16.10 
  10 -22  -1  232.48   24.10 
 -10 -22   1  287.97   29.70 
 -10  22   1  250.57   23.70 
  10  22  -1  213.58   24.50 
   9 -22  -1  146.79   18.40 
  -9 -22   1  103.39   19.40 
   9  22  -1  118.49   19.40 
  -9  22   1   95.59   15.70 
   8 -22  -1   44.20   11.40 
  -8 -22   1   30.40   11.50 
  -8  22   1   20.80    8.10 
   8  22  -1   16.40    7.40 
   7 -22  -1   96.39   16.50 
  -7 -22   1  101.29   19.00 
  -7  22   1   77.39   13.70 
   7  22  -1  139.89   17.90 
   6 -22  -1  699.83   42.30 
   6  22  -1  763.62   26.40 
   6  22  -1  752.32   43.40 
  -6  22   1  818.92   41.10 
   6  22  -1  778.32   26.70 
  -5 -22   1  587.84   24.70 
   5 -22  -1  574.84   35.80 
   5  22  -1  593.24   25.00 
   5  22  -1  625.54   37.20 
  -5  22   1  545.05   32.60 
   5  22  -1  585.94   23.60 
   4 -22  -1  212.38   19.80 
  -4 -22   1  186.68   13.90 
  -4  22   1  211.18   18.70 
   4  22  -1  185.98   12.90 
   4  22  -1  183.98   18.80 
  -3 -22   1  141.29   12.90 
   3  22  -1  159.58   12.30 
  -3  22   1  166.58   16.40 
   3  22  -1  149.59   16.50 
  -2 -22   1  126.59   12.80 
   2 -22  -1  121.09   14.00 
  -2  22   1  109.69   13.70 
   2  22  -1  109.79   14.10 
  -1 -22   1    2.90    4.80 
   1 -22  -1   19.50    6.40 
  -1  22   1    7.40    5.70 
   1  22  -1   20.60    6.60 
   0 -22  -1   -5.50    3.40 
   0  22   1    3.40    4.30 
   0  22  -1    6.00    4.60 
   1 -22   1   -1.70    2.40 
  -1  22  -1    0.90    3.30 
   1  22   1    1.70    3.80 
   2 -22   1   -1.10    4.70 
  -2 -22  -1   13.00    4.70 
   2  22   1   18.90    7.50 
  -2  22  -1    5.40    4.30 
  -3 -22  -1   12.70    5.50 
   3 -22   1   12.60    6.00 
   3  22   1    5.10    5.90 
  -3  22  -1   22.60    6.70 
  -4 -22  -1  118.49   12.40 
   4 -22   1  153.98   16.00 
   4  22   1  133.89   16.00 
   4  22   1  136.69   12.70 
  -4  22  -1  147.79   15.80 
   4  22   1  126.79   10.60 
   5 -22   1  553.14   34.50 
   5  22   1  514.55   24.60 
   5  22   1  537.85   23.20 
   5  22   1  504.65   34.30 
  -5  22  -1  573.84   33.20 
   6 -22   1  392.16   29.10 
   6  22   1  367.86   28.70 
  -6  22  -1  387.76   27.20 
   7 -22   1   36.10   10.20 
  -7 -22  -1   84.39   16.80 
  -7  22  -1   53.89   10.80 
   7  22   1   58.39    6.60 
   7  22   1   68.29   13.50 
   8 -22   1   73.99   18.00 
   9 -22   1  230.08   23.60 
  -9 -22  -1  236.88   26.90 
  -9  22  -1  204.28   20.70 
   9  22   1  270.27   26.00 
   9 -23  -1  156.28   20.50 
  -9 -23   1  121.89   22.50 
   9  23  -1  156.88   19.10 
  -9  23   1  149.79   17.00 
  -8 -23   1   32.50   10.60 
   8  23  -1   32.50   10.70 
  -8  23   1   19.40    7.40 
   7 -23  -1   21.50    8.00 
   7  23  -1   21.60    8.30 
  -7  23   1    7.00    5.00 
   6 -23  -1   16.70    8.30 
  -6  23   1   20.80    8.30 
   6  23  -1   22.70    9.20 
   6  23  -1   14.70    3.60 
  -5 -23   1   46.50    6.70 
   5 -23  -1   37.40    9.70 
   5  23  -1   43.60   10.90 
  -5  23   1   45.50   10.10 
   5  23  -1   45.40    7.20 
   4 -23  -1   39.10   10.20 
   4  23  -1   36.20    6.30 
   4  23  -1   37.80    9.80 
  -4  23   1   40.40   10.10 
  -3 -23   1   12.90    5.10 
   3 -23  -1   12.50    5.60 
   3  23  -1   13.60    4.50 
   3  23  -1   15.00    5.90 
  -3  23   1   24.30    7.60 
  -2 -23   1  303.37   20.80 
   2  23  -1  329.97   25.50 
  -2  23   1  334.37   24.40 
  -1 -23   1  722.73   36.10 
   1 -23  -1  764.82   39.60 
  -1  23   1  795.72   41.10 
   1  23  -1  782.22   41.20 
   0 -23   1 1291.27   54.19 
   0 -23  -1 1320.57   56.09 
   0  23   1 1374.86   59.29 
   0  23  -1 1437.66   59.79 
   1 -23   1 1243.18   53.89 
  -1 -23  -1 1259.07   53.09 
  -1  23  -1 1325.27   57.09 
   1  23   1 1406.56   58.99 
  -2 -23  -1  235.18   18.40 
   2 -23   1  221.98   28.10 
  -2  23  -1  217.78   19.90 
   2  23   1  205.48   19.50 
  -3 -23  -1  291.27   20.00 
   3 -23   1  294.47   22.80 
  -3  23  -1  282.47   22.80 
   3  23   1  282.87   24.20 
   4 -23   1  577.34   34.10 
  -4 -23  -1  563.94   28.00 
   4  23   1  589.44   28.60 
   4  23   1  516.05   35.00 
  -4  23  -1  584.84   33.90 
   4  23   1  544.45   26.00 
   5 -23   1  283.07   24.50 
  -5 -23  -1  264.57   17.10 
  -5  23  -1  294.67   23.00 
   5  23   1  274.87   24.80 
   5  23   1  320.97   18.00 
   6 -23   1   36.60   10.60 
  -6  23  -1   43.70   10.40 
   6  23   1   29.90    8.30 
   6  23   1   53.29   12.10 
   7 -23   1    1.00    5.40 
   7  23   1   12.00   12.60 
  -8 -23  -1   21.00   10.90 
   8 -23   1   -6.30    4.80 
   8  23   1    3.30    5.70 
  -8  23  -1   12.10    6.90 
   8 -24  -1   67.79   14.10 
  -8  24   1   74.19   13.70 
   8  24  -1   59.29   12.70 
   7 -24  -1  444.16   33.00 
  -7  24   1  443.56   30.00 
   7  24  -1  366.16   30.10 
   6 -24  -1 1328.47   63.39 
  -6  24   1 1412.96   60.79 
   6  24  -1 1318.37   44.70 
   6  24  -1 1387.66   64.59 
   5 -24  -1 1401.16   64.39 
  -5 -24   1 1383.06   47.80 
  -5  24   1 1436.46   61.09 
   5  24  -1 1391.76   64.39 
   5  24  -1 1431.76   48.50 
  -4 -24   1  362.26   21.00 
   4 -24  -1  410.36   28.80 
   4  24  -1  350.06   28.10 
  -4  24   1  427.06   28.60 
   3 -24  -1  200.38   19.80 
  -3 -24   1  168.08   14.70 
  -3  24   1  182.68   18.50 
   3  24  -1  152.08   17.60 
  -2 -24   1  113.19   12.60 
   2 -24  -1   85.89   13.90 
  -2  24   1   67.59   13.00 
   2  24  -1   91.59   14.90 
   1 -24  -1   40.30    9.50 
  -1 -24   1   39.30    8.70 
  -1  24   1   31.90    9.50 
   1  24  -1   32.40    9.30 
   0 -24   1  167.18   16.90 
   0 -24  -1  191.88   18.50 
   0  24   1  173.28   18.90 
   0  24  -1  197.58   19.30 
   1 -24   1   64.69   11.60 
  -1 -24  -1   75.49   12.00 
   1  24   1   60.49   12.90 
  -1  24  -1   49.20   11.40 
  -2 -24  -1    4.30    4.20 
   2 -24   1    3.50    4.50 
   2  24   1    9.20    5.40 
  -2  24  -1    4.60    4.70 
  -3 -24  -1  263.67   19.20 
   3 -24   1  171.38   19.60 
  -3  24  -1  240.58   21.00 
   3  24   1  223.48   21.10 
  -4 -24  -1  896.01   38.90 
   4 -24   1  961.00   48.20 
  -4  24  -1  895.31   45.80 
   4  24   1  960.10   40.00 
   4  24   1  932.31   49.99 
  -5 -24  -1  950.60   38.80 
   5 -24   1 1049.79   51.99 
   5  24   1  932.61   38.50 
  -5  24  -1 1081.89   50.49 
   5  24   1 1089.39   54.49 
   6 -24   1  397.86   30.90 
   7 -24   1   96.99   16.80 
   7  24   1   79.89   15.60 
  -7  24  -1   86.59   15.20 
   8 -24   1  181.18   21.60 
   8  24   1  219.38   22.90 
  -8  24  -1  176.78   19.90 
   7 -25  -1  103.19   18.00 
   7  25  -1   82.29   16.60 
  -7  25   1  117.29   15.50 
   6 -25  -1   77.49   16.20 
  -6  25   1  106.29   16.70 
   6  25  -1   99.29   18.30 
   5 -25  -1   45.90   13.00 
  -5 -25   1   56.49    7.70 
  -5  25   1   44.20   16.80 
   5  25  -1   39.80   11.10 
   5  25  -1   62.79   20.10 
   4 -25  -1   13.70    6.60 
  -4 -25   1    2.20    4.80 
   4  25  -1    5.80    5.40 
  -4  25   1    6.00    5.70 
   3 -25  -1   36.00   10.30 
  -3 -25   1   36.40    7.40 
  -3  25   1   33.40    9.10 
   3  25  -1   28.60    8.80 
   2 -25  -1  454.25   30.70 
  -2 -25   1  462.55   27.50 
   2  25  -1  449.86   31.60 
  -2  25   1  473.35   32.00 
  -1 -25   1  573.44   32.40 
   1 -25  -1  582.74   35.20 
  -1  25   1  588.94   36.30 
   1  25  -1  598.54   36.80 
   0 -25  -1  666.33   37.00 
   0 -25   1  632.04   34.90 
   0  25   1  693.03   39.90 
   0  25  -1  621.04   38.00 
   1 -25   1  811.12   41.20 
  -1 -25  -1  738.03   38.80 
   1  25   1  750.42   42.90 
  -1  25  -1  786.62   43.00 
  -2 -25  -1  155.88   16.10 
   2 -25   1  171.78   18.40 
   2  25   1  201.28   20.10 
  -2  25  -1  192.78   19.60 
   3 -25   1   36.90    8.70 
  -3 -25  -1   30.40    7.30 
  -3  25  -1   20.40    7.80 
   3  25   1   22.20    8.20 
   4 -25   1   56.89   13.20 
  -4 -25  -1   40.40    8.80 
   4  25   1   40.30   10.60 
   4  25   1   40.90    8.60 
  -4  25  -1   44.50   10.50 
  -5 -25  -1   83.59   10.50 
   5 -25   1   89.99   15.50 
   5  25   1   74.99    9.80 
  -5  25  -1   64.99   13.10 
   5  25   1   66.49   15.20 
   6 -25   1  141.29   31.50 
  -6  25  -1   98.29   16.20 
   6  25   1   98.79   18.40 
   7 -25   1    9.20    5.90 
   7  25   1    4.00    7.50 
  -7  25  -1    2.10    5.10 
   6 -26  -1   31.50   10.80 
   6  26  -1   67.29   14.80 
  -6  26   1   52.09   12.50 
   5 -26  -1  218.88   23.40 
   5  26  -1  231.58   23.40 
  -5  26   1  197.18   20.30 
  -4 -26   1  176.48   15.70 
   4 -26  -1  194.98   22.70 
  -4  26   1  181.48   19.30 
   4  26  -1  204.18   21.60 
  -3 -26   1  124.59   12.70 
   3 -26  -1   84.19   14.40 
   2 -26  -1    3.80    6.20 
  -2 -26   1    4.10    5.10 
   2  26  -1   16.30    7.10 
  -2  26   1    0.80    4.60 
   1 -26  -1   14.50    7.10 
  -1 -26   1    5.80    6.30 
  -1  26   1    8.10    5.90 
   1  26  -1   15.60    7.70 
   0 -26   1   26.40    9.60 
   0 -26  -1   36.60    9.80 
   0  26   1   22.60    9.90 
   0  26  -1   28.10    9.60 
   1 -26   1   63.09   12.80 
  -1 -26  -1   97.69   15.50 
   1  26   1   92.49   16.30 
  -1  26  -1   69.09   14.50 
  -2 -26  -1   25.90    7.20 
   2 -26   1   27.80    7.40 
   2  26   1   36.20   11.00 
  -2  26  -1   19.70    9.80 
   3 -26   1  143.49   17.90 
  -3 -26  -1  149.79   14.40 
   3  26   1  102.39   22.50 
  -3  26  -1   91.29   16.50 
  -4 -26  -1  147.79   14.40 
   4 -26   1  149.59   17.60 
  -4  26  -1  141.19   16.50 
   4  26   1   90.79   16.60 
   4  26   1  149.49   14.10 
  -5 -26  -1  197.58   15.10 
   5 -26   1  206.68   23.20 
   5  26   1  170.28   15.60 
   5  26   1  198.28   22.10 
  -5  26  -1  199.68   20.50 
   5 -27  -1    4.90    7.70 
   5  27  -1   19.80    9.50 
  -5  27   1   25.80    8.90 
   4 -27  -1   17.40    8.70 
  -4 -27   1    5.00    5.90 
   4  27  -1    2.30    4.80 
  -4  27   1    9.60    5.50 
   3 -27  -1   35.50   10.60 
  -3 -27   1   66.99   10.80 
   3  27  -1   58.59   13.10 
  -3  27   1   48.00   12.00 
  -2 -27   1   16.70    6.90 
   2 -27  -1   15.60    7.80 
   2  27  -1   32.40    9.30 
  -2  27   1   39.30   10.20 
  -1 -27   1    0.00    6.20 
   1 -27  -1    6.70    5.90 
   1  27  -1    6.80    6.00 
  -1  27   1    2.40    7.10 
   0 -27   1    2.70    7.10 
   0  27  -1   -7.30    5.30 
   0  27   1    3.60    6.80 
  -1 -27  -1   20.60    8.20 
   1 -27   1   21.10    7.60 
   1  27   1   24.70   10.00 
  -1  27  -1   25.10    8.70 
   2 -27   1   97.69   16.00 
  -2 -27  -1  126.89   14.70 
   2  27   1  108.09   17.70 
  -2  27  -1  119.09   15.40 
   3 -27   1   -3.20    6.50 
  -3 -27  -1    1.40    5.30 
  -3  27  -1    2.60    5.40 
   3  27   1    5.30    6.80 
  -4 -27  -1   27.00    7.50 
   4 -27   1   41.60   12.90 
  -4  27  -1   34.70    9.70 
   4  27   1   59.49   14.30 
   4  27   1   54.09    8.70 
  -2 -28   1   11.20    6.10 
   2 -28  -1    2.10    5.70 
   2  28  -1   -1.50    7.20 
  -2  28   1   -9.20    4.60 
   1 -28  -1   65.79   13.70 
  -1 -28   1   55.99   11.20 
   1  28  -1   68.39   14.20 
  -1  28   1   60.69   13.60 
   0 -28   1    8.10    7.30 
   0 -28  -1    1.90    6.30 
   0  28   1   -1.20    6.80 
   0  28  -1    9.00    6.10 
   1 -28   1   12.30    8.80 
  -1 -28  -1  -11.80    5.30 
  -1  28  -1   -6.40    5.50 
   1  28   1   -3.20    6.40 
   2 -28   1   -0.50    7.10 
  -2 -28  -1    1.00    6.10 
   2  28   1    2.60    6.50 
  -2  28  -1    1.70    5.40 
 -16   0   2  824.12   46.80 
  16   0  -2  767.62   40.40 
  15   0  -2  553.74   31.10 
 -15   0   2  576.44   37.00 
 -14   0   2   92.19   15.30 
  14   0  -2   49.80    8.90 
 -13   0   2  201.48   18.70 
  13   0  -2  206.98   16.10 
 -12   0   2 1354.96   55.69 
  12   0  -2 1330.57   49.80 
 -11   0   2 1845.42   66.59 
 -11   0   2 1733.93   59.89 
  11   0  -2 1867.01   60.99 
  10   0  -2 1040.50   44.10 
 -10   0   2  947.51   37.30 
 -10   0   2 1075.29   42.90 
   9   0  -2  597.14   24.90 
  -9   0   2  557.84   24.30 
  -9   0   2  584.94   27.90 
  -8   0   2  405.26   18.20 
   8   0  -2  377.46   17.80 
   8   0  -2  363.26   19.30 
  -8   0   2  425.26   21.60 
   7   0  -2   56.69    5.50 
  -7   0   2   53.19    6.50 
  -7   0   2   64.39    6.20 
   7   0  -2   53.79    6.30 
  -6   0   2  657.53   23.20 
  -6   0   2  678.73   26.10 
   6   0  -2  678.83   23.80 
   6   0  -2  650.93   25.20 
  -5   0   2  216.08   11.40 
   5   0  -2  218.28   11.40 
  -5   0   2  200.68    9.50 
   5   0  -2  214.68   10.20 
  -4   0   2  634.24   19.90 
   4   0  -2  620.74   21.40 
   4   0  -2  604.14   20.50 
  -4   0   2  615.44   21.60 
  -3   0   2    3.90    1.20 
   3   0  -2    2.90    1.10 
   3   0  -2    8.90    1.80 
   0   0  -2  856.51   23.60 
   0   0   2  684.13   20.00 
   1   0   2  373.26   13.40 
  -1   0  -2  371.36   13.50 
  -1   0  -2  364.86   11.80 
   1   0   2  371.16   11.70 
   2   0   2 3002.10   80.79 
  -2   0  -2 2917.41   80.29 
   2   0   2 2913.41   78.79 
   3   0   2 2177.28   61.79 
  -3   0  -2 2163.68   61.39 
  -3   0  -2 2121.89   60.49 
   3   0   2 2093.49   59.99 
  -5   0  -2  275.97   14.60 
   5   0   2  290.17   15.30 
   5   0   2  282.27   14.10 
  -5   0  -2  300.27   15.10 
  -6   0  -2  254.27   14.70 
   6   0   2  240.28   14.20 
   6   0   2  244.48   13.70 
  -6   0  -2  226.28   13.60 
   7   0   2  544.55   23.90 
   7   0   2  515.05   28.10 
  -7   0  -2  566.74   25.50 
  -7   0  -2  485.85   27.30 
   8   0   2   51.99    8.20 
  -8   0  -2   79.89    9.20 
  -8   0  -2   79.69    8.60 
  -9   0  -2   36.10    7.60 
   9   0   2   49.10    8.50 
  10   0   2 1006.30   40.40 
 -10   0  -2 1020.50   44.20 
 -11   0  -2  288.07   21.70 
  11   0   2  309.17   19.80 
 -12   0  -2    3.10    4.60 
 -13   0  -2  137.59   15.90 
  13   0   2  105.29   12.10 
  14   0   2 1475.25   58.99 
 -14   0  -2 1486.65   66.69 
 -16  -1   2  864.21   49.99 
  16  -1  -2  877.91   43.90 
 -16   1   2  939.01   51.19 
  16   1  -2  865.51   41.80 
 -15  -1   2  230.08   21.50 
  15  -1  -2  200.38   18.00 
  15   1  -2  207.38   17.20 
 -15   1   2  217.28   21.20 
  14  -1  -2   89.99   11.30 
 -14  -1   2  126.29   15.00 
 -14   1   2   92.19   15.30 
  14   1  -2   86.79   10.90 
 -13  -1   2  212.98   19.60 
  13  -1  -2  211.88   16.30 
  13   1  -2  188.78   15.70 
 -13   1   2  219.98   19.80 
 -12  -1   2   46.30   10.00 
  12  -1  -2   47.80    8.50 
  12   1  -2   63.79    8.30 
 -12   1   2   46.80    9.80 
  11  -1  -2  113.99   11.20 
 -11  -1   2  106.99   10.50 
 -11  -1   2  121.79   13.10 
 -11   1   2  115.19   12.00 
  11   1  -2  128.59   11.10 
  10  -1  -2  109.49   10.00 
 -10  -1   2   94.69   10.80 
 -10  -1   2   84.99    9.10 
 -10   1   2   98.49   10.00 
  10   1  -2   90.39    8.70 
 -10   1   2  108.99   11.00 
  -9  -1   2   76.29    9.10 
   9  -1  -2   67.89    7.20 
  -9  -1   2   76.49    7.80 
  -9   1   2   64.89    8.20 
   9   1  -2   62.49    6.70 
  -9   1   2   63.09    7.90 
   8  -1  -2  444.46   20.20 
  -8  -1   2  442.26   22.70 
   8  -1  -2  446.66   21.50 
  -8  -1   2  445.96   19.30 
   8   1  -2  448.76   19.30 
  -8   1   2  458.25   20.30 
   8   1  -2  467.35   22.20 
  -8   1   2  494.65   23.50 
  -7  -1   2 2684.03   81.49 
   7  -1  -2 2690.13   80.09 
  -7  -1   2 2719.53   76.69 
   7  -1  -2 2812.02   78.89 
   7   1  -2 2775.12   76.99 
   7   1  -2 2682.33   80.49 
  -7   1   2 2641.14   80.69 
  -7   1   2 2674.63   77.69 
  -6  -1   2 9287.17  244.08 
   6  -1  -2 9073.29  242.68 
  -6  -1   2 9098.69  238.98 
   6   1  -2 9525.75  239.78 
   6   1  -2 9063.29  242.78 
  -6   1   2 9069.49  240.18 
  -6   1   2 9189.88  243.38 
   5  -1  -2 8346.87  217.18 
  -5  -1   2 8139.19  213.48 
   5   1  -2 8396.66  214.48 
   5   1  -2 8162.28  217.08 
  -5   1   2 8173.28  214.98 
   4  -1  -2 1454.95   43.70 
   4  -1  -2 1477.75   43.70 
  -4  -1   2 1547.05   44.90 
  -4  -1   2 1461.95   41.30 
   4   1  -2 1525.05   42.20 
   4   1  -2 1430.46   43.70 
  -4   1   2 1507.85   44.10 
   3  -1  -2 1347.87   39.00 
   3  -1  -2 1383.06   39.80 
  -3  -1   2 1362.36   37.60 
  -3  -1   2 1369.06   39.60 
  -3   1   2 1322.77   39.00 
   3   1  -2 1340.57   39.20 
   3   1  -2 1393.46   38.20 
  -3   1   2 1368.76   39.20 
   2  -1  -2 1108.59   30.70 
  -2  -1   2 1036.60   31.30 
  -2  -1   2 1118.99   30.90 
   2  -1  -2 1088.39   32.50 
   2   1  -2 1084.89   30.90 
   2   1  -2 1137.99   31.10 
  -2   1   2 1100.89   30.80 
  -2   1   2 1088.69   32.20 
  -1  -1   2 2635.24   69.29 
  -1  -1   2 2777.12   69.89 
  -1  -1   2 2340.67   68.09 
   1  -1  -2 2740.93   67.79 
   1  -1  -2 2481.25   71.69 
  -1   1   2 2776.62   71.09 
   1   1  -2 2452.95   69.19 
   1   1  -2 2734.73   68.19 
   0  -1   2 1567.94   43.20 
   0  -1   2 1499.15   41.00 
   0  -1  -2 1611.94   44.30 
   0  -1  -2 1603.54   44.10 
   0   1   2 1585.34   43.90 
   0   1   2 1637.14   44.50 
   0   1  -2 1656.43   43.50 
   0   1  -2 1442.36   40.80 
   0   1   2 1493.45   41.10 
   1  -1   2 1053.79   30.90 
   1  -1   2 1037.70   28.70 
  -1  -1  -2  995.30   29.10 
  -1   1  -2  993.40   28.70 
   1   1   2 1030.40   28.90 
   1   1   2 1026.30   30.50 
  -1   1  -2 1079.49   31.20 
  -2  -1  -2  574.24   19.20 
   2  -1   2  575.44   18.70 
   2  -1   2  610.24   20.80 
  -2  -1  -2  559.74   22.20 
   2   1   2  591.54   19.90 
  -2   1  -2  564.54   18.70 
  -2   1  -2  568.14   20.20 
   2   1   2  590.94   18.90 
   3  -1   2    4.30    2.40 
  -3  -1  -2    2.50    1.10 
  -3  -1  -2    0.90    1.10 
   3  -1   2    3.00    1.40 
  -3   1  -2    2.40    1.80 
  -3   1  -2    2.70    1.30 
   3   1   2    2.60    1.90 
   4  -1   2 6533.55  171.38 
   4  -1   2 6429.56  169.38 
  -4  -1  -2 6382.16  170.38 
  -4  -1  -2 6117.69  169.28 
   4   1   2 6335.77  169.38 
   4   1   2 6583.24  170.58 
  -4   1  -2 6199.08  170.48 
  -4   1  -2 6417.26  169.88 
  -5  -1  -2 6581.84  183.38 
  -5  -1  -2 6981.30  185.38 
   5  -1   2 6898.91  183.78 
   5  -1   2 7007.20  185.38 
   5   1   2 7132.89  184.98 
   5   1   2 6804.92  183.68 
  -5   1  -2 6665.33  184.58 
  -5   1  -2 6902.11  184.68 
  -6  -1  -2 1643.64   54.19 
  -6  -1  -2 1628.24   52.29 
   6  -1   2 1634.14   52.59 
   6  -1   2 1695.63   53.89 
   6   1   2 1752.92   53.69 
   6   1   2 1611.34   52.49 
  -6   1  -2 1611.04   53.19 
  -6   1  -2 1689.33   53.79 
  -7  -1  -2  729.13   29.10 
   7  -1   2  722.83   29.30 
   7  -1   2  741.93   30.30 
  -7  -1  -2  748.23   31.20 
  -7   1  -2  739.03   30.00 
   7   1   2  717.63   29.70 
  -7   1  -2  719.33   30.40 
   7   1   2  722.73   29.40 
  -8  -1  -2  399.46   20.30 
  -8  -1  -2  407.26   22.50 
   8  -1   2  376.46   20.50 
   8   1   2  403.66   20.80 
  -8   1  -2  408.06   21.90 
  -8   1  -2  403.96   21.10 
   9  -1   2 1012.40   40.00 
  -9  -1  -2 1061.09   43.40 
  -9   1  -2 1006.50   42.20 
   9   1   2 1047.70   40.20 
 -10  -1  -2 1246.98   50.79 
  10  -1   2 1255.57   47.00 
 -10   1  -2 1209.28   49.80 
  10   1   2 1205.18   46.00 
 -11  -1  -2  875.91   42.10 
  11  -1   2  870.91   37.60 
  11   1   2  859.81   36.80 
 -11   1  -2  821.12   40.90 
  12  -1   2  242.08   18.20 
 -12  -1  -2  256.17   21.60 
  12   1   2  219.08   17.20 
 -12   1  -2  272.97   21.90 
  13  -1   2   30.60    6.60 
 -13  -1  -2   54.89   11.40 
 -13   1  -2   48.30   10.20 
  13   1   2   29.40    6.70 
  14  -1   2    0.20    4.40 
 -14  -1  -2    7.70    7.90 
 -14   1  -2    2.90    6.10 
  14   1   2   -9.50    4.70 
 -16  -2   2  230.08   24.20 
  16  -2  -2  196.58   20.50 
  16   2  -2  241.98   20.90 
 -16   2   2  242.28   23.90 
 -15  -2   2  190.58   20.20 
  15  -2  -2  167.08   16.40 
 -15   2   2  196.68   20.20 
  15   2  -2  150.28   14.70 
  14  -2  -2   -2.90    3.10 
 -14  -2   2    1.70    3.50 
  14   2  -2   10.20    4.30 
 -14   2   2    7.50    4.80 
 -13  -2   2   10.90    5.90 
  13  -2  -2   27.20    6.60 
 -13   2   2   19.90    7.10 
  13   2  -2   26.50    6.20 
 -12  -2   2  442.66   28.10 
 -12  -2   2  418.76   21.90 
  12  -2  -2  393.56   23.40 
  12   2  -2  434.16   22.20 
 -12   2   2  441.86   27.10 
 -11  -2   2  907.31   35.60 
  11  -2  -2  936.31   38.80 
 -11  -2   2  975.20   43.60 
  11   2  -2  995.20   43.10 
 -11   2   2  984.10   42.20 
 -10  -2   2  563.74   29.20 
 -10  -2   2  555.84   23.80 
  10  -2  -2  597.34   26.80 
 -10   2   2  526.95   25.40 
 -10   2   2  548.75   28.10 
  10   2  -2  511.05   23.10 
   9  -2  -2   12.30    4.60 
  -9  -2   2    1.70    2.80 
  -9   2   2    0.30    2.20 
   9   2  -2    3.10    1.80 
  -9   2   2    3.70    3.20 
   8  -2  -2  396.56   20.00 
  -8  -2   2  400.96   21.60 
  -8  -2   2  414.46   17.60 
   8  -2  -2  405.26   19.30 
  -8   2   2  400.66   20.70 
   8   2  -2  398.16   20.10 
   8   2  -2  419.16   17.50 
  -8   2   2  380.06   18.90 
   7  -2  -2   62.29    8.20 
   7  -2  -2   57.49    6.20 
  -7  -2   2   48.70    6.40 
  -7  -2   2   56.69    5.40 
  -7   2   2   64.79    6.80 
   7   2  -2   60.09    9.40 
   7   2  -2   56.69    5.20 
  -7   2   2   53.99    5.90 
   6  -2  -2 2813.02   82.79 
  -6  -2   2 2875.71   84.69 
   6  -2  -2 2956.30   82.69 
  -6  -2   2 2899.71   79.79 
   6   2  -2 2864.51   83.69 
   6   2  -2 2932.31   79.19 
  -6   2   2 2896.31   83.69 
  -6   2   2 2859.61   81.19 
   5  -2  -2 1048.80   34.10 
  -5  -2   2 1059.69   35.40 
   5  -2  -2 1045.00   34.10 
  -5  -2   2 1022.70   30.40 
  -5   2   2 1027.40   34.20 
   5   2  -2 1019.20   34.20 
   5   2  -2 1060.19   31.00 
  -5   2   2 1046.60   32.90 
  -4  -2   2   69.39    5.70 
  -4  -2   2   76.19    3.90 
   4  -2  -2   70.49    5.50 
   4  -2  -2   68.49    5.30 
  -4   2   2   67.99    5.30 
   4   2  -2   70.89    4.20 
   4   2  -2   72.09    5.60 
  -4   2   2   69.99    5.20 
   3  -2  -2  937.31   28.70 
  -3  -2   2  929.21   29.70 
  -3  -2   2  970.20   26.40 
   3  -2  -2  957.00   30.00 
   3   2  -2  927.81   29.20 
  -3   2   2  942.11   29.30 
   3   2  -2  987.80   26.90 
  -3   2   2  938.21   28.80 
  -2  -2   2 1310.17   36.00 
   2  -2  -2 1350.06   39.40 
  -2  -2   2 1317.37   38.20 
  -2  -2   2 1340.37   36.30 
   2  -2  -2 1336.57   37.20 
  -2   2   2 1349.47   37.20 
  -2   2   2 1326.27   38.90 
   2   2  -2 1341.77   37.90 
   2   2  -2 1336.67   36.20 
   1  -2  -2 3547.75   97.29 
  -1  -2   2 3734.63   95.49 
   1  -2  -2 3616.14   94.39 
  -1   2   2 3529.45   97.09 
   1   2  -2 3726.43   95.39 
   1  -2   2  137.59    6.00 
  -1  -2  -2  132.09    7.00 
   1  -2   2  142.29    7.50 
   1   2   2  134.49    7.30 
   1   2   2  140.29    6.40 
  -1   2  -2  147.19    7.40 
  -1   2  -2  115.49    8.50 
   2  -2   2  201.28    8.70 
   2  -2   2  208.78   10.50 
  -2  -2  -2  189.48    9.20 
  -2   2  -2  188.88    8.50 
   2   2   2  199.08    9.20 
   2   2   2  196.08    8.80 
  -2   2  -2  183.28    9.80 
  -3  -2  -2 2932.41   82.39 
   3  -2   2 3044.20   84.29 
  -3  -2  -2 3067.19   83.49 
   3  -2   2 2973.70   81.99 
  -3   2  -2 2936.81   82.09 
   3   2   2 3090.19   82.79 
   3   2   2 2941.61   82.19 
  -3   2  -2 2944.11   83.99 
  -4  -2  -2   -0.10    1.30 
  -4  -2  -2    6.30    2.40 
   4  -2   2   10.00    3.60 
   4  -2   2    1.10    1.40 
  -4   2  -2    1.70    2.20 
  -4   2  -2    1.20    1.40 
   4   2   2    0.20    1.70 
   4   2   2    2.60    1.90 
   5  -2   2   20.20    3.90 
  -5  -2  -2   14.60    4.00 
   5  -2   2   12.80    4.00 
  -5  -2  -2   13.60    3.40 
   5   2   2   14.00    3.50 
  -5   2  -2   16.20    4.00 
  -5   2  -2   12.80    3.40 
   5   2   2   13.50    3.90 
  -6  -2  -2  275.37   16.30 
   6  -2   2  301.67   16.40 
  -6  -2  -2  289.87   14.90 
   6  -2   2  287.77   15.40 
  -6   2  -2  281.77   15.60 
   6   2   2  295.27   15.70 
  -6   2  -2  305.57   16.70 
   6   2   2  305.07   15.90 
  -7  -2  -2   14.20    4.20 
   7  -2   2   14.80    4.10 
  -7  -2  -2   15.10    3.80 
   7  -2   2    7.00    3.90 
  -7   2  -2    8.20    3.60 
  -7   2  -2   11.30    3.90 
   7   2   2   17.10    4.00 
   7   2   2   17.20    4.70 
  -8  -2  -2    0.20    2.60 
   8  -2   2    1.40    2.90 
  -8  -2  -2    7.80    4.10 
  -8   2  -2    2.80    2.70 
  -8   2  -2   -3.60    4.00 
   8   2   2   -1.10    2.70 
  -9  -2  -2    3.40    3.40 
   9  -2   2   -0.40    3.00 
  -9  -2  -2   -1.30    2.70 
   9   2   2   -0.40    3.40 
  -9   2  -2    0.10    2.90 
 -10  -2  -2  564.24   31.00 
  10  -2   2  549.15   27.70 
 -10   2  -2  581.14   30.10 
  10   2   2  547.45   26.80 
 -11  -2  -2  156.88   16.50 
  11  -2   2  191.68   15.50 
  11   2   2  198.28   15.10 
 -11   2  -2  205.28   17.80 
  12  -2   2    4.60    4.60 
 -12  -2  -2    4.00    4.30 
 -12   2  -2   -4.80    3.30 
  12   2   2    8.50    4.50 
 -13  -2  -2   89.69   15.10 
  13  -2   2   68.59   11.60 
 -13   2  -2   64.79   13.10 
  13   2   2   62.49   12.40 
  14  -2   2  361.06   24.90 
 -14  -2  -2  321.17   28.20 
 -14   2  -2  342.17   27.60 
  14   2   2  350.66   23.60 
 -16  -3   2    0.00    6.10 
  16  -3  -2    3.80    6.70 
 -16   3   2   14.70    7.40 
  16   3  -2   10.30    5.50 
  15  -3  -2    3.60    4.50 
 -15  -3   2   14.10    7.50 
  15   3  -2    6.30    4.20 
 -15   3   2    3.60    4.90 
 -14  -3   2   13.70    6.90 
  14  -3  -2   32.10   13.40 
  14   3  -2   28.20    6.30 
 -14   3   2    9.90    6.30 
 -13  -3   2   14.00    6.80 
  13  -3  -2   35.10    7.50 
  13   3  -2   22.90    5.60 
 -13   3   2   18.70    5.80 
  12  -3  -2    3.50    3.70 
 -12  -3   2   -0.20    3.10 
 -12  -3   2   -1.90    3.10 
 -12   3   2    9.10    5.20 
  12   3  -2   -0.20    2.50 
 -11  -3   2   10.20    4.10 
  11  -3  -2    5.60    3.50 
 -11  -3   2    7.30    4.60 
 -11   3   2    8.10    4.50 
  11   3  -2    2.20    3.20 
  10  -3  -2   11.20    4.60 
 -10  -3   2   -1.10    2.80 
 -10  -3   2    5.30    3.00 
 -10   3   2    1.00    3.70 
  10   3  -2    3.40    2.40 
 -10   3   2    3.40    3.30 
   9  -3  -2  114.29   10.10 
  -9  -3   2  101.09    8.30 
  -9  -3   2  131.89   12.30 
   9   3  -2  126.69    8.70 
  -9   3   2  112.19   10.20 
  -9   3   2  133.29   11.80 
  -8  -3   2   92.09    7.40 
   8  -3  -2  108.99    9.40 
   8  -3  -2  102.79    9.00 
  -8  -3   2   85.59    9.60 
   8   3  -2  115.99    7.70 
  -8   3   2  103.29    9.00 
  -8   3   2  105.49    9.80 
   8   3  -2  101.59    9.30 
  -7  -3   2  786.72   38.80 
   7  -3  -2  856.31   31.50 
   7  -3  -2  746.73   35.50 
  -7  -3   2  853.81   27.30 
   7   3  -2  852.21   27.20 
  -7   3   2  849.61   30.20 
  -7   3   2  840.52   36.10 
   7   3  -2  811.12   37.00 
  -6  -3   2  320.77   17.20 
   6  -3  -2  334.77   16.10 
   6  -3  -2  357.56   16.60 
  -6  -3   2  321.87   12.80 
   6   3  -2  338.77   16.50 
  -6   3   2  346.67   16.60 
   6   3  -2  343.57   13.00 
  -6   3   2  344.57   15.50 
   5  -3  -2  114.59    8.00 
  -5  -3   2   87.39    7.60 
   5  -3  -2   97.09    7.10 
  -5  -3   2  104.39    5.30 
   5   3  -2   92.59    5.30 
  -5   3   2   90.99    6.80 
   5   3  -2  112.09    7.90 
  -5   3   2   96.89    7.30 
  -4  -3   2 2630.44   73.59 
  -4  -3   2 2527.65   66.59 
   4  -3  -2 2471.15   71.29 
   4  -3  -2 2566.74   72.59 
   4   3  -2 2552.04   67.19 
  -4   3   2 2573.24   71.59 
  -4   3   2 2549.24   71.39 
   4   3  -2 2517.75   72.09 
  -3  -3   2  471.15   13.20 
  -3  -3   2  464.85   17.80 
   3  -3  -2  476.15   18.00 
   3  -3  -2  456.35   16.50 
  -3   3   2  460.35   16.50 
  -3   3   2  464.65   17.20 
   3   3  -2  468.35   13.50 
   3   3  -2  465.75   17.30 
   2  -3  -2 1379.46   39.90 
  -2  -3   2 1419.96   37.90 
  -2  -3   2 1448.36   41.60 
   2  -3  -2 1401.56   42.10 
  -2  -3   2 1410.46   37.40 
   2   3  -2 1416.56   37.70 
   2   3  -2 1416.56   41.00 
  -2   3   2 1403.46   39.80 
  -2   3   2 1410.96   41.70 
   1  -3  -2  363.86   14.50 
   1  -3  -2  367.76   12.70 
  -1  -3   2  375.46   12.20 
  -1   3   2  364.96   14.40 
   1   3  -2  380.76   13.70 
   1   3  -2  390.86   12.20 
   0  -3  -2  110.19    6.10 
   0  -3  -2  114.59    5.60 
   0  -3   2  112.69    5.50 
   0  -3   2  114.69    6.10 
   0  -3  -2  107.49    6.50 
   0   3   2  114.49    6.10 
   0   3   2  101.89    5.80 
   0   3   2  114.89    6.70 
   0   3  -2  121.69    6.10 
   0   3  -2  127.09    6.80 
  -1  -3  -2 2283.37   64.19 
  -1  -3  -2 2264.47   64.09 
   1  -3   2 2338.87   64.39 
   1  -3   2 2332.27   62.69 
  -1  -3  -2 2272.67   63.99 
   1   3   2 2319.07   63.89 
   1   3   2 2289.77   63.49 
  -1   3  -2 2313.77   62.39 
   1   3   2 2339.07   64.69 
  -2  -3  -2  417.56   16.50 
   2  -3   2  462.45   17.70 
   2   3   2  427.96   15.80 
  -2   3  -2  425.06   17.00 
   2   3   2  427.06   15.70 
  -2   3  -2  421.96   15.40 
  -3  -3  -2   17.60    3.50 
   3  -3   2   13.30    3.30 
   3  -3   2   14.20    2.80 
  -3  -3  -2   20.50    3.30 
  -3   3  -2   14.50    2.90 
   3   3   2   13.10    2.70 
  -3   3  -2   16.40    3.50 
   3   3   2   12.10    2.70 
   4  -3   2  283.27   14.50 
  -4  -3  -2  286.77   14.60 
   4  -3   2  261.37   12.90 
   4   3   2  299.27   13.50 
  -4   3  -2  274.97   13.40 
  -4   3  -2  267.97   14.30 
   4   3   2  270.27   13.40 
  -5  -3  -2  679.23   27.50 
  -5  -3  -2  680.13   25.10 
   5  -3   2  719.83   27.50 
   5  -3   2  681.43   25.80 
  -5   3  -2  635.44   26.80 
   5   3   2  665.73   25.90 
  -5   3  -2  697.13   26.30 
   5   3   2  675.23   25.40 
  -6  -3  -2  299.87   15.30 
   6  -3   2  304.77   17.00 
  -6  -3  -2  311.57   17.50 
   6  -3   2  287.67   16.70 
   6   3   2  309.67   15.80 
   6   3   2  290.07   16.60 
  -6   3  -2  315.17   16.50 
  -7  -3  -2   30.40    5.20 
   7  -3   2   26.50    5.50 
  -7  -3  -2   32.00    6.70 
   7  -3   2   25.40    5.30 
  -7   3  -2   26.80    5.60 
  -7   3  -2   26.40    5.80 
   7   3   2   28.40    5.40 
   7   3   2   20.10    5.10 
  -8  -3  -2   84.99    8.50 
   8  -3   2   63.79    8.80 
  -8  -3  -2   83.39    9.80 
  -8   3  -2   80.19    9.10 
   8   3   2   81.09   12.30 
  -9  -3  -2  948.51   42.50 
  -9  -3  -2  977.00   37.90 
   9  -3   2  986.60   39.70 
  -9   3  -2 1025.20   41.50 
   9   3   2 1036.70   38.90 
  10  -3   2  283.97   18.80 
 -10  -3  -2  266.77   20.50 
  10   3   2  283.17   17.80 
 -10   3  -2  238.68   18.80 
  11  -3   2    0.40    3.60 
 -11  -3  -2   -2.10    3.70 
  11   3   2    5.10    3.80 
 -11   3  -2    5.50    5.10 
 -12  -3  -2  147.29   16.70 
  12  -3   2  155.18   14.60 
  12   3   2  163.88   14.10 
 -12   3  -2  152.18   16.20 
 -13  -3  -2   -0.60    4.10 
  13  -3   2   -0.60    3.80 
  13   3   2   -1.00    3.00 
 -13   3  -2   -5.80    3.90 
 -14  -3  -2   48.50   13.30 
  14   3   2   35.40    8.60 
 -14   3  -2   28.60   11.10 
 -16  -4   2  101.19   17.80 
  16  -4  -2   77.79   13.20 
 -16   4   2   81.29   15.30 
  16   4  -2  106.69   12.10 
  15  -4  -2  142.89   16.00 
 -15  -4   2  111.49   28.70 
 -15   4   2  131.49   29.60 
  15   4  -2  118.69   12.90 
 -14  -4   2   15.30    6.80 
  14  -4  -2   31.50    7.20 
  14   4  -2   34.60    7.60 
 -14   4   2   13.10    5.80 
 -13  -4   2    1.50    4.10 
 -13  -4   2   -6.50    3.30 
  13  -4  -2   11.50    5.30 
 -13   4   2   -0.80    3.40 
  13   4  -2    6.10    3.70 
 -12  -4   2  209.38   15.00 
 -12  -4   2  210.08   19.60 
  12  -4  -2  234.88   17.90 
 -12   4   2  204.08   17.50 
 -11  -4   2   -0.20    2.80 
  11  -4  -2   -1.00    2.50 
 -11  -4   2    4.30    3.00 
 -11   4   2    2.30    4.10 
  11   4  -2   -0.30    2.00 
 -10  -4   2  256.77   19.50 
  10  -4  -2  292.27   18.30 
 -10  -4   2  259.07   13.70 
  10   4  -2  228.88   13.20 
 -10   4   2  257.17   18.20 
  -9  -4   2   57.09    9.50 
   9  -4  -2   41.90    7.30 
  -9  -4   2   50.69    5.60 
  -9   4   2   48.60    7.70 
  -9   4   2   48.70    8.20 
   9   4  -2   50.39    5.30 
   8  -4  -2  241.08   14.90 
  -8  -4   2  224.78   11.20 
   8  -4  -2  210.98   15.70 
  -8  -4   2  257.87   17.10 
  -8   4   2  236.68   15.20 
   8   4  -2  249.08   11.40 
   8   4  -2  219.98   14.50 
  -8   4   2  221.68   14.20 
   7  -4  -2   50.99    6.50 
  -7  -4   2   42.90    7.30 
   7  -4  -2   44.10    5.80 
   7   4  -2   42.80    6.70 
  -7   4   2   46.00    5.80 
  -7   4   2   49.99    6.20 
   7   4  -2   47.10    4.10 
   6  -4  -2    6.40    2.50 
   6  -4  -2    6.10    2.50 
  -6  -4   2   12.50    2.20 
  -6  -4   2    8.70    3.50 
   6   4  -2   11.60    3.10 
   6   4  -2    9.10    1.80 
  -6   4   2   22.00    4.20 
  -6   4   2   13.20    3.40 
  -5  -4   2   19.80    4.50 
   5  -4  -2   25.90    4.30 
  -5  -4   2   21.60    2.20 
   5  -4  -2   26.20    4.60 
   5   4  -2   25.60    2.20 
   5   4  -2   22.70    4.20 
  -5   4   2   20.80    3.90 
  -5   4   2   20.40    3.70 
  -4  -4   2  127.49    8.80 
  -4  -4   2  132.39    4.50 
   4  -4  -2  128.29    7.90 
   4  -4  -2  141.59    9.00 
   4   4  -2  138.19    8.70 
  -4   4   2  127.89    7.90 
  -4   4   2  130.09    8.10 
   4   4  -2  129.29    4.70 
   3  -4  -2 1728.23   49.99 
   3  -4  -2 1736.93   51.69 
  -3  -4   2 1752.62   52.09 
   3   4  -2 1682.13   50.99 
  -3   4   2 1771.92   49.90 
  -3   4   2 1707.43   50.59 
  -1  -4   2  563.94   20.00 
   1  -4  -2  563.14   18.70 
   1  -4  -2  545.55   20.40 
  -1  -4   2  585.14   19.10 
  -1  -4   2  546.85   17.50 
   1   4  -2  553.44   17.50 
  -1   4   2  570.14   18.70 
  -1   4   2  592.24   20.80 
   1   4  -2  557.84   18.90 
   1   4  -2  593.64   20.20 
   0  -4   2  596.34   19.40 
   0  -4  -2  577.74   20.70 
   0  -4  -2  570.64   19.20 
   0  -4   2  566.94   19.20 
   0   4   2  627.14   20.70 
   0   4   2  576.04   19.20 
   0   4  -2  564.94   19.00 
   0   4  -2  592.84   19.40 
   0   4   2  595.14   20.80 
   1  -4   2 2490.75   67.59 
  -1  -4  -2 2441.76   68.69 
   1  -4   2 2432.56   68.49 
  -1  -4  -2 2425.86   69.19 
  -1   4  -2 2427.16   68.69 
   1   4   2 2521.55   68.89 
   1   4   2 2469.05   69.09 
   1   4   2 2463.65   68.39 
  -1   4  -2 2456.75   67.19 
   2  -4   2  872.81   28.20 
   2  -4   2  911.21   30.00 
  -2  -4  -2  872.11   28.80 
  -2  -4  -2  895.31   30.10 
   2   4   2  877.81   29.10 
   2   4   2  904.21   30.40 
  -2   4  -2  911.41   28.20 
  -2   4  -2  879.41   29.90 
   2   4   2  910.81   28.40 
  -3  -4  -2   89.89    6.40 
  -3  -4  -2  103.99    7.80 
   3  -4   2   93.89    6.70 
   3  -4   2  120.49    8.40 
   3   4   2   97.99    6.90 
   3   4   2   93.09    7.00 
  -3   4  -2   98.69    7.70 
  -3   4  -2   91.99    6.50 
   3   4   2  102.29    6.60 
   4  -4   2 2779.42   79.59 
   4  -4   2 2794.12   81.29 
  -4  -4  -2 2899.91   82.39 
  -4  -4  -2 2763.12   78.79 
  -4   4  -2 2775.12   79.59 
  -4   4  -2 2720.83   81.59 
   4   4   2 2888.51   78.79 
   4   4   2 2746.13   79.99 
  -5  -4  -2  347.57   16.00 
   5  -4   2  381.46   17.50 
  -5  -4  -2  367.76   18.90 
   5  -4   2  371.66   18.30 
   5   4   2  372.76   16.70 
  -5   4  -2  355.76   18.30 
  -5   4  -2  357.76   17.10 
   5   4   2  365.26   17.30 
   6  -4   2   15.10    4.30 
   6  -4   2   17.30    4.60 
  -6  -4  -2   15.80    7.00 
   6   4   2   18.90    4.50 
  -6   4  -2   14.20    4.50 
   6   4   2   27.70    6.80 
   7  -4   2  713.73   29.50 
  -7  -4  -2  690.13   27.60 
   7  -4   2  748.53   30.50 
  -7  -4  -2  762.92   33.00 
  -7   4  -2  709.83   30.00 
  -7   4  -2  708.13   31.00 
   7   4   2  668.73   29.00 
   7   4   2  729.43   28.70 
  -8  -4  -2   57.39    9.90 
   8  -4   2   49.40    8.00 
   8   4   2   55.59    8.20 
  -8   4  -2   48.00    8.30 
   9  -4   2  860.01   37.20 
  -9  -4  -2  868.41   40.50 
  -9  -4  -2  874.31   34.90 
   9   4   2  943.01   36.10 
  -9   4  -2  933.71   38.90 
  10  -4   2  580.24   29.20 
 -10  -4  -2  577.14   32.40 
  10   4   2  560.34   26.90 
 -10   4  -2  557.84   30.00 
 -11  -4  -2   24.10    7.80 
  11  -4   2   35.90    7.90 
 -11   4  -2   30.50    7.90 
  11   4   2   35.10    7.00 
 -12  -4  -2   62.59   12.90 
  12  -4   2   62.29   10.80 
  12   4   2   72.19    9.50 
 -12   4  -2   58.69   10.90 
 -13  -4  -2   43.70   12.80 
  13  -4   2   52.59   10.30 
  13   4   2   60.19    9.70 
 -13   4  -2   59.49   11.90 
 -14  -4  -2  316.27   51.59 
  14  -4   2  261.17   21.30 
  14   4   2  251.37   18.70 
 -14   4  -2  316.77   48.40 
 -16  -5   2   75.39   14.60 
  16  -5  -2   78.59   13.40 
 -16   5   2  109.79   18.30 
  16   5  -2   75.19   12.40 
  15  -5  -2  122.49   15.00 
 -15  -5   2   88.89   21.40 
 -15   5   2   69.49   24.10 
  15   5  -2  143.29   12.80 
 -14  -5   2   16.60    5.40 
 -14  -5   2   14.50    7.00 
  14  -5  -2   24.40    6.30 
  14   5  -2   12.90    4.80 
 -14   5   2   11.60    5.90 
 -13  -5   2   12.40    5.90 
 -13  -5   2    8.20    3.80 
  13  -5  -2    9.20    6.70 
 -13   5   2    2.70    4.10 
  13   5  -2    5.60    3.50 
  12  -5  -2   13.90    6.50 
 -12  -5   2   39.20    9.80 
 -12  -5   2   25.90    4.90 
  12   5  -2   17.80    4.40 
 -12   5   2   16.60    6.20 
 -11  -5   2 1363.46   43.10 
  11  -5  -2 1304.17   51.09 
 -11  -5   2 1373.46   56.29 
  11   5  -2 1159.28   42.60 
 -11   5   2 1419.06   53.29 
  10  -5  -2 3352.46  100.69 
 -10  -5   2 3346.97  105.39 
 -10  -5   2 3266.07   90.69 
  10   5  -2 2849.11   90.19 
 -10   5   2 3385.96  101.69 
   9  -5  -2    6.30    3.40 
  -9  -5   2   12.70    3.00 
  -9  -5   2   12.50    4.30 
   9   5  -2    5.10    1.90 
  -9   5   2    9.10    3.80 
  -9   5   2   14.20    5.70 
   8  -5  -2  349.27   19.10 
  -8  -5   2  344.37   20.90 
   8  -5  -2  328.87   26.80 
  -8  -5   2  316.07   13.20 
   8   5  -2  343.57   13.70 
  -8   5   2  317.17   17.70 
  -8   5   2  331.97   18.70 
   7  -5  -2 1168.48   40.90 
  -7  -5   2 1134.19   32.90 
   7  -5  -2 1081.39   39.40 
  -7  -5   2 1085.69   42.40 
  -7   5   2 1132.49   40.20 
   7   5  -2 1183.28   33.20 
   7   5  -2 1072.59   39.90 
  -7   5   2 1080.49   38.60 
  -6  -5   2 2378.16   73.29 
   6  -5  -2 2459.05   71.69 
  -6  -5   2 2301.87   62.19 
   6  -5  -2 2281.17   69.79 
  -6   5   2 2265.27   69.79 
   6   5  -2 2268.47   70.49 
  -6   5   2 2318.27   69.19 
   6   5  -2 2418.86   62.99 
  -5  -5   2 1273.77   44.00 
   5  -5  -2 1321.27   43.00 
   5  -5  -2 1238.08   41.30 
  -5  -5   2 1265.67   34.00 
  -5   5   2 1333.17   41.80 
   5   5  -2 1285.57   42.50 
   5   5  -2 1291.07   34.40 
  -5   5   2 1278.67   41.50 
   4  -5  -2  164.68   10.40 
  -4  -5   2  170.48   11.20 
   4  -5  -2  175.68    9.80 
  -4   5   2  168.28    9.60 
  -4   5   2  169.78    9.80 
   4   5  -2  175.48   10.60 
   3  -5  -2  634.14   23.90 
   3  -5  -2  625.24   22.30 
  -3  -5   2  659.63   24.60 
  -3   5   2  634.64   22.20 
   3   5  -2  639.34   23.70 
  -3   5   2  625.54   22.80 
  -2  -5   2   15.20    1.60 
   2  -5  -2   11.40    2.80 
  -2  -5   2   14.00    3.10 
   2  -5  -2   14.60    2.60 
   2   5  -2   14.70    3.20 
  -2   5   2   16.40    3.00 
   2   5  -2   10.90    1.50 
  -2   5   2   15.70    2.70 
  -1  -5   2  252.57    9.90 
   1  -5  -2  272.07   12.70 
  -1  -5   2  237.58   11.80 
  -1  -5   2  272.07   12.70 
   1  -5  -2  267.57   11.60 
  -1   5   2  272.47   12.40 
   1   5  -2  258.97   15.20 
   1   5  -2  260.17   11.50 
  -1   5   2  266.27   11.30 
   1   5  -2  276.77   10.30 
   0  -5   2 2994.90   80.79 
   0  -5   2 2968.50   79.69 
   0  -5  -2 2915.21   81.89 
   0  -5  -2 2910.01   80.49 
   0   5  -2 2941.21   80.39 
   0   5  -2 2974.10   80.09 
   0   5   2 2943.81   80.59 
   0   5   2 3043.90   82.49 
   0   5   2 2761.72   82.99 
   1  -5   2 4305.17  116.89 
  -1  -5  -2 4401.86  119.09 
   1  -5   2 4284.27  117.19 
  -1  -5  -2 4292.37  117.69 
  -1   5  -2 4365.16  116.59 
   1   5   2 4385.76  121.79 
   1   5   2 4451.75  117.69 
  -1   5  -2 4421.36  117.99 
   2  -5   2 1229.08   38.50 
   2  -5   2 1236.38   39.40 
  -2  -5  -2 1260.47   40.80 
   2   5   2 1211.98   39.50 
   2   5   2 1254.97   39.10 
   2   5   2 1264.87   38.20 
  -2   5  -2 1327.67   40.80 
   3  -5   2  105.59    8.20 
  -3  -5  -2   98.19    8.10 
  -3  -5  -2  101.59    7.00 
   3  -5   2   96.09    7.10 
   3   5   2  108.89    7.60 
   3   5   2  115.19    7.00 
  -3   5  -2  107.89    7.30 
  -3   5  -2   99.79    8.20 
   3   5   2  105.49    7.90 
  -4  -5  -2 1588.94   48.90 
  -4  -5  -2 1571.84   52.59 
   4  -5   2 1596.94   49.99 
   4  -5   2 1654.63   51.59 
  -4   5  -2 1683.93   53.09 
   4   5   2 1663.63   49.99 
  -4   5  -2 1598.54   49.90 
   4   5   2 1575.44   50.59 
   4   5   2 1642.14   48.40 
   5  -5   2 2638.14   77.49 
  -5  -5  -2 2523.55   74.19 
   5  -5   2 2517.65   75.69 
  -5  -5  -2 2641.64   79.49 
   5   5   2 2544.55   76.39 
   5   5   2 2610.84   74.09 
  -5   5  -2 2664.33   76.39 
  -5   5  -2 2441.26   77.59 
   6  -5   2  280.17   15.60 
  -6  -5  -2  283.87   17.70 
   6  -5   2  278.97   16.30 
   6   5   2  291.17   15.90 
  -6   5  -2  274.47   15.70 
   6   5   2  264.97   14.40 
  -6   5  -2  272.27   16.90 
   7  -5   2   91.19    8.70 
   7  -5   2  106.59   10.30 
  -7  -5  -2   78.99    9.60 
   7   5   2   78.39    8.50 
  -7   5  -2   88.19    8.90 
   7   5   2   74.89    8.50 
   8  -5   2  580.74   27.50 
  -8  -5  -2  587.94   30.20 
  -8  -5  -2  567.44   24.60 
   8   5   2  557.34   25.30 
  -8   5  -2  571.94   27.40 
  -9  -5  -2 1233.68   45.50 
  -9  -5  -2 1348.07   53.89 
   9  -5   2 1257.17   49.00 
   9   5   2 1346.07   46.90 
  -9   5  -2 1386.76   50.89 
 -10  -5  -2  311.07   23.00 
  10  -5   2  334.07   21.30 
 -10  -5  -2  327.87   23.90 
  10   5   2  329.47   19.20 
 -10   5  -2  332.07   22.30 
 -11  -5  -2   52.39   10.70 
  11  -5   2   50.19   14.90 
  11   5   2   51.99    8.30 
 -11   5  -2   69.69   11.40 
  12  -5   2   44.10    9.70 
 -12  -5  -2   38.20    9.70 
 -12   5  -2   30.80    8.40 
  12   5   2   34.20    6.80 
  13  -5   2    4.70    4.60 
 -13  -5  -2    6.40    5.40 
 -13   5  -2    3.80    4.90 
  13   5   2    5.70    3.90 
  14  -5   2   10.10    6.60 
 -14  -5  -2    6.60   13.00 
 -14   5  -2   -6.70    5.20 
 -15  -6   2  436.36   33.90 
  15  -6  -2  377.26   27.70 
  15   6  -2  395.36   22.20 
 -15   6   2  431.56   30.40 
 -14  -6   2  186.98   19.60 
  14  -6  -2  203.48   18.30 
 -14  -6   2  164.38   13.00 
 -14   6   2  171.08   18.00 
  14   6  -2  178.08   13.40 
 -13  -6   2  247.48   22.00 
 -13  -6   2  247.98   15.20 
  13  -6  -2  239.28   19.60 
 -13   6   2  252.27   20.50 
  13   6  -2  229.88   14.60 
 -12  -6   2  816.12   42.20 
 -12  -6   2  809.82   29.10 
  12  -6  -2  756.12   37.80 
  12   6  -2  742.73   29.30 
 -12   6   2  751.92   37.90 
 -11  -6   2 2651.73   75.29 
  11  -6  -2 2599.84   86.69 
 -11  -6   2 2723.93   92.39 
 -11   6   2 2870.81   88.79 
  11   6  -2 2245.38   74.59 
  10  -6  -2 1739.13   61.19 
 -10  -6   2 1686.83   64.49 
 -10  -6   2 1726.33   50.59 
 -10   6   2 1777.22   61.79 
  10   6  -2 1557.24   50.49 
  -9  -6   2  237.68   11.00 
  -9  -6   2  247.28   18.60 
   9  -6  -2  231.98   16.50 
   9   6  -2  250.17   11.40 
  -9   6   2  243.68   16.70 
   8  -6  -2  553.24   25.80 
  -8  -6   2  549.85   27.80 
  -8  -6   2  502.45   17.50 
  -8   6   2  468.45   23.20 
  -8   6   2  533.15   25.00 
   8   6  -2  518.05   17.90 
   7  -6  -2  433.06   21.60 
  -7  -6   2  465.65   23.80 
   7  -6  -2  410.26   20.40 
  -7  -6   2  428.56   14.10 
  -7   6   2  411.86   19.80 
  -7   6   2  437.36   21.10 
   7   6  -2  410.06   14.20 
   7   6  -2  438.56   21.40 
   6  -6  -2    9.70    3.10 
   6  -6  -2    6.10    2.70 
  -6  -6   2    8.20    1.20 
  -6  -6   2   13.80    4.40 
   6   6  -2    6.30    2.70 
   6   6  -2    7.80    1.20 
  -6   6   2    9.20    2.80 
  -6   6   2    5.10    2.70 
   5  -6  -2   24.20    4.30 
   5  -6  -2   18.80    4.20 
  -5  -6   2   16.20    4.40 
  -5   6   2   27.70    4.70 
  -5   6   2   20.60    3.90 
   5   6  -2   21.90    4.60 
  -4  -6   2  241.78   14.20 
   4  -6  -2  210.08   11.70 
   4  -6  -2  247.48   13.50 
  -4   6   2  206.48   11.70 
  -4   6   2  233.88   12.00 
   4   6  -2  228.68   12.90 
   3  -6  -2    2.40    1.60 
  -3  -6   2    0.50    1.30 
   3  -6  -2    4.50    2.10 
  -3   6   2    6.30    2.10 
   3   6  -2    1.60    1.60 
  -3   6   2    2.60    1.50 
   2  -6  -2 5029.60  134.29 
   2  -6  -2 4797.72  131.89 
  -2  -6   2 4785.72  126.99 
  -2  -6   2 4915.41  134.79 
  -2   6   2 5020.00  131.89 
   2   6  -2 4960.50  132.89 
   2   6  -2 4883.11  127.39 
  -2   6   2 4865.01  132.69 
   2   6  -2 5001.50  134.59 
   1   6  -2 9081.19  239.58 
  -1  -6  -2 6802.62  181.48 
  -1  -6  -2 6988.70  183.78 
   1  -6   2 6897.81  181.08 
   1   6   2 6854.41  181.58 
  -1   6  -2 6662.83  180.98 
   1   6   2 6809.52  183.08 
  -1   6  -2 6865.81  180.58 
   1   6   2 6889.31  181.58 
   2  -6   2   49.20    5.20 
   2  -6   2   43.90    4.70 
  -2  -6  -2   39.80    4.20 
  -2  -6  -2   48.10    5.40 
   2   6   2   34.60    5.40 
   2   6   2   46.30    4.50 
   2   6   2   41.10    4.50 
  -2   6  -2   41.90    4.30 
   3  -6   2  808.12   29.60 
  -3  -6  -2  822.12   28.40 
   3  -6   2  838.52   29.20 
  -3  -6  -2  825.72   31.50 
   3   6   2  817.22   30.10 
  -3   6  -2  838.22   28.80 
  -3   6  -2  841.32   30.60 
   3   6   2  830.72   27.60 
   3   6   2  845.12   29.00 
   4  -6   2  527.95   21.80 
   4  -6   2  556.54   22.80 
  -4  -6  -2  536.15   20.80 
  -4  -6  -2  517.45   24.00 
   4   6   2  520.75   19.80 
   4   6   2  543.55   22.70 
  -4   6  -2  545.55   21.80 
  -4   6  -2  509.45   23.10 
   4   6   2  517.65   21.10 
   5  -6   2 1436.16   47.50 
  -5  -6  -2 1421.26   45.50 
  -5  -6  -2 1425.56   50.79 
   5   6   2 1499.25   45.20 
  -5   6  -2 1378.26   49.40 
  -5   6  -2 1446.46   47.40 
   5   6   2 1513.95   46.70 
   5   6   2 1431.66   48.00 
   6  -6   2  697.33   29.00 
   6  -6   2  652.93   27.80 
  -6  -6  -2  660.93   26.00 
  -6  -6  -2  700.63   31.30 
   6   6   2  654.13   28.00 
  -6   6  -2  699.63   28.40 
   6   6   2  713.73   26.50 
  -6   6  -2  675.93   29.80 
   7  -6   2  294.77   17.70 
  -7  -6  -2  269.67   14.90 
  -7  -6  -2  274.27   18.70 
   7   6   2  282.87   15.60 
  -7   6  -2  289.77   17.10 
  -8  -6  -2   23.30    6.80 
   8  -6   2   26.20    6.30 
  -8  -6  -2   34.30    5.80 
   8   6   2   25.60    5.60 
  -8   6  -2   23.70    6.20 
   9  -6   2 1774.22   63.59 
  -9  -6  -2 1804.52   59.89 
  -9  -6  -2 1864.71   69.29 
  -9   6  -2 1858.61   64.69 
   9   6   2 1886.01   60.49 
  10  -6   2  909.31   40.90 
 -10  -6  -2  923.41   37.50 
 -10  -6  -2 1041.40   47.30 
  10   6   2  985.40   38.10 
 -10   6  -2  996.10   42.70 
 -11  -6  -2  416.96   28.20 
  11  -6   2  407.86   25.10 
 -11   6  -2  409.96   25.80 
  11   6   2  365.86   21.00 
  12  -6   2   72.39   12.00 
 -12  -6  -2   61.59   13.00 
 -12   6  -2   38.90    9.50 
  12   6   2   54.89    8.70 
  13  -6   2  149.69   16.30 
 -13  -6  -2  201.48   21.10 
 -13   6  -2  180.78   17.80 
  13   6   2  159.58   13.80 
 -14  -6  -2  533.15   38.60 
  14  -6   2  550.74   33.40 
  14   6   2  571.44   28.80 
 -14   6  -2  576.64   36.50 
  15  -7  -2  160.08   19.00 
 -15  -7   2  176.38   21.40 
 -15   7   2  207.18   20.50 
  15   7  -2  217.28   15.00 
 -14  -7   2   63.39   14.10 
  14  -7  -2   55.39   11.00 
 -14   7   2   55.49   11.40 
  14   7  -2   57.19    9.50 
  13  -7  -2    8.30    5.30 
 -13  -7   2   12.30    6.20 
 -13   7   2    9.30    5.60 
  13   7  -2   14.50    3.90 
 -12  -7   2   64.49    6.60 
  12  -7  -2   53.79   10.90 
 -12  -7   2   64.29   13.00 
  12   7  -2   68.99    6.90 
 -12   7   2   70.69   11.70 
 -11  -7   2  728.03   48.30 
  11  -7  -2  800.62   37.60 
 -11   7   2  802.92   45.40 
  11   7  -2  733.83   27.00 
  10  -7  -2  631.84   31.80 
 -10  -7   2  636.34   22.20 
 -10  -7   2  672.03   35.10 
  10   7  -2  575.44   22.00 
 -10   7   2  666.93   31.70 
   9  -7  -2   52.89    8.80 
  -9  -7   2   78.29   10.40 
  -9   7   2   75.19    8.90 
   9   7  -2   79.49    5.50 
  -8  -7   2   14.20    2.20 
   8  -7  -2   11.40    3.90 
  -8  -7   2   10.60    5.00 
   8   7  -2   14.10    2.20 
  -8   7   2   20.00    4.70 
  -7  -7   2 1235.88   34.40 
  -7  -7   2 1268.27   48.50 
   7  -7  -2 1326.27   46.50 
   7  -7  -2 1199.88   44.00 
  -7   7   2 1248.88   43.60 
   7   7  -2 1261.27   34.70 
   7   7  -2 1214.58   44.90 
  -7   7   2 1247.78   44.30 
   7   7  -2 1288.97   34.50 
   6  -7  -2 4230.38  120.59 
   6  -7  -2 4702.03  121.39 
   6   7  -2 4374.06  122.09 
  -6   7   2 3722.03  130.69 
  -6   7   2 3672.13  137.09 
  -5  -7   2 1116.39   41.10 
   5  -7  -2 1036.30   37.10 
   5  -7  -2 1096.69   39.20 
  -5   7   2 1070.29   37.00 
   5   7  -2 1098.29   39.00 
  -5   7   2 1073.99   37.10 
   4  -7  -2 1402.46   46.00 
  -4  -7   2 1351.66   46.80 
   4  -7  -2 1317.37   43.50 
  -4   7   2 1315.17   43.20 
  -4   7   2 1353.46   43.30 
   4   7  -2 1361.76   45.90 
  -3  -7   2  117.39    9.50 
  -3  -7   2  123.99    4.80 
   3  -7  -2  115.19    8.30 
   3  -7  -2  118.99    9.20 
   3   7  -2  126.29    9.50 
   3   7  -2  132.99    4.80 
  -3   7   2  125.89    8.40 
  -3   7   2  121.89    8.40 
  -2  -7   2  480.95   19.30 
  -2  -7   2  535.65   22.70 
   2  -7  -2  503.85   20.20 
   2  -7  -2  535.05   21.80 
  -2   7   2  526.35   20.60 
   2   7  -2  523.25   20.90 
   2   7  -2  532.75   22.30 
  -2   7   2  511.25   19.90 
   2   7  -2  516.25   16.50 
   1  -7  -2 1343.97   41.90 
   1  -7  -2 1348.07   43.20 
  -1  -7   2 1307.57   38.40 
  -1  -7   2 1318.67   42.00 
   1   7  -2 1350.36   42.20 
   1   7  -2 1350.96   44.20 
  -1   7   2 1384.06   41.90 
  -1   7   2 1323.37   42.00 
   1   7  -2 1343.77   39.10 
   0  -7   2  129.09    8.40 
   0  -7  -2  115.09    8.00 
   0  -7  -2  119.89    8.50 
   0  -7   2  130.69    7.40 
   0   7  -2  132.89    8.50 
   0   7   2  128.29    8.40 
   0   7   2  144.49    9.80 
   0   7  -2  125.19    7.80 
   0   7   2  121.89    8.20 
   1  -7   2  753.12   25.30 
  -1  -7  -2  751.82   28.40 
   1  -7   2  734.53   26.20 
  -1  -7  -2  727.13   26.20 
   1   7   2  691.33   25.70 
  -1   7  -2  704.03   25.50 
   1   7   2  738.23   28.00 
  -1   7  -2  721.23   25.80 
   1   7   2  732.43   26.50 
   2  -7   2   83.59    6.80 
  -2  -7  -2   73.39    6.20 
  -2  -7  -2   87.09    7.90 
   2  -7   2   80.69    6.80 
   2   7   2   72.29    6.10 
   2   7   2   70.19    6.90 
  -2   7  -2   87.69    6.60 
   2   7   2   80.29    6.60 
  -2   7  -2   67.39    6.70 
  -3  -7  -2   15.40    4.40 
   3  -7   2   14.30    3.30 
   3   7   2    6.10    2.00 
  -3   7  -2   10.00    3.50 
  -3   7  -2   12.70    3.20 
   3   7   2   10.40    2.80 
   3   7   2    7.20    3.10 
   4  -7   2  588.44   24.20 
  -4  -7  -2  573.84   22.70 
   4  -7   2  573.54   24.30 
  -4  -7  -2  588.24   26.80 
   4   7   2  637.24   22.30 
   4   7   2  631.04   23.70 
  -4   7  -2  577.34   23.70 
  -4   7  -2  610.04   26.30 
   4   7   2  584.04   25.10 
   5  -7   2 1554.14   50.79 
  -5  -7  -2 1519.35   53.69 
  -5  -7  -2 1468.65   47.40 
   5   7   2 1538.75   46.70 
  -5   7  -2 1544.25   52.09 
   5   7   2 1427.86   56.29 
  -5   7  -2 1484.55   49.40 
   5   7   2 1528.55   48.40 
  -6  -7  -2  615.34   30.00 
   6  -7   2  626.14   27.00 
   6  -7   2  617.44   27.30 
  -6  -7  -2  595.44   24.40 
   6   7   2  640.94   24.50 
   6   7   2  632.54   27.30 
  -6   7  -2  616.84   28.60 
  -6   7  -2  594.74   26.30 
   6   7   2  621.74   25.40 
  -7  -7  -2  113.89    9.10 
   7  -7   2  138.79   12.00 
  -7  -7  -2  119.79   12.90 
   7   7   2  129.19   10.30 
   7   7   2  131.09   10.20 
  -7   7  -2  115.09   10.80 
   8  -7   2  624.34   29.50 
  -8  -7  -2  572.34   25.50 
  -8  -7  -2  611.44   32.20 
   8   7   2  623.94   26.30 
  -8   7  -2  638.24   29.40 
  -9  -7  -2 2859.41   89.09 
   9  -7   2 2931.81   94.49 
  -9  -7  -2 3066.59  100.89 
   9   7   2 3061.99   91.49 
  -9   7  -2 3011.70   94.89 
 -10  -7  -2 2520.45   91.59 
  10  -7   2 2575.84   85.59 
 -10  -7  -2 2497.65   79.89 
  10   7   2 2661.63   80.19 
 -10   7  -2 2576.84   87.09 
 -11  -7  -2  397.06   28.80 
  11  -7   2  391.56   25.10 
  11   7   2  392.86   21.50 
 -11   7  -2  432.56   26.30 
  12  -7   2   10.80    5.30 
 -12  -7  -2   51.79   11.50 
 -12   7  -2   23.20    7.30 
  12   7   2   22.30    5.20 
 -13  -7  -2   97.19   17.60 
  13  -7   2  114.69   14.60 
  13   7   2  117.69   12.00 
 -13   7  -2  118.69   15.00 
  14  -7   2   -3.20    6.30 
 -14  -7  -2    8.10    6.80 
 -14   7  -2    3.60    5.80 
 -15  -8   2   99.09   18.30 
  15  -8  -2   95.49   16.10 
 -15   8   2  137.79   15.80 
  14  -8  -2  214.98   20.30 
 -14  -8   2  270.07   25.30 
  14   8  -2  225.78   13.70 
 -14   8   2  206.98   19.90 
 -13  -8   2  210.18   21.30 
  13  -8  -2  207.28   19.50 
 -13  -8   2  211.58   12.50 
  13   8  -2  199.88   12.30 
 -13   8   2  214.38   18.80 
  12  -8  -2  759.52   38.40 
 -12  -8   2  738.33   26.50 
 -12  -8   2  718.83   41.40 
  12   8  -2  707.53   26.50 
 -12   8   2  814.32   38.80 
 -11  -8   2 2146.79   61.99 
 -11  -8   2 2317.57   83.19 
  11  -8  -2 2093.89   76.29 
  11   8  -2 2081.99   62.09 
 -11   8   2 2214.18   76.89 
 -10  -8   2 2187.88   79.69 
 -10  -8   2 2233.38   66.99 
  10  -8  -2 2236.98   75.79 
  10   8  -2 1915.31   60.09 
 -10   8   2 2255.37   74.49 
  -9  -8   2  679.43   22.30 
  -9  -8   2  698.63   35.90 
   9  -8  -2  723.73   33.80 
   9   8  -2  727.43   22.50 
  -9   8   2  751.02   33.60 
   9   8  -2  708.83   22.80 
  -8  -8   2   25.30    6.90 
   8  -8  -2   30.00    7.00 
   8   8  -2   34.90    2.60 
   8   8  -2   29.70    2.70 
  -8   8   2   35.70    6.90 
  -7  -8   2  585.54   29.50 
   7  -8  -2  526.05   25.20 
   7  -8  -2  564.54   26.90 
  -7   8   2  573.64   25.70 
   7   8  -2  555.04   26.20 
  -7   8   2  522.05   24.40 
  -6  -8   2 2202.38   73.49 
   6  -8  -2 2307.27   71.59 
   6  -8  -2 2198.38   69.19 
   6   8  -2 2256.27   70.79 
  -6   8   2 2213.38   68.89 
  -6   8   2 2178.58   68.29 
  -5  -8   2   12.70    4.40 
   5  -8  -2   11.40    2.90 
   5  -8  -2   16.70    4.30 
  -5   8   2   10.00    3.10 
   5   8  -2    9.70    3.10 
  -5   8   2   11.30    3.40 
   4  -8  -2    4.50    2.10 
   4  -8  -2    0.40    1.70 
  -4  -8   2    1.70    2.30 
  -4   8   2    1.20    1.70 
   4   8  -2    1.70    2.10 
  -4   8   2    2.40    1.60 
   3  -8  -2   76.19    7.00 
   3  -8  -2   80.99    7.80 
  -3  -8   2   77.39    4.10 
  -3  -8   2   89.89    8.70 
  -3   8   2   77.79    6.90 
  -3   8   2   84.79    7.00 
   3   8  -2   89.59    4.30 
   3   8  -2   80.69    7.50 
   3   8  -2   87.99    8.20 
  -2  -8   2 2791.82   76.69 
   2  -8  -2 2971.90   84.39 
   2  -8  -2 2791.02   82.19 
  -2  -8   2 2904.81   85.79 
   2   8  -2 2845.72   76.99 
   2   8  -2 2829.12   82.99 
  -2   8   2 2945.01   82.19 
  -2   8   2 2816.02   81.99 
   2   8  -2 2954.00   85.59 
  -1  -8   2 4812.22  128.49 
   1  -8  -2 4885.41  133.99 
  -1  -8   2 4830.62  132.99 
   1  -8  -2 4781.92  132.59 
  -1   8   2 4917.71  132.69 
   1   8  -2 4881.31  135.79 
  -1   8   2 4864.51  132.59 
   1   8  -2 4910.31  133.19 
   0  -8   2 8719.33  231.68 
   0  -8  -2 8645.33  231.48 
   0  -8  -2 8889.31  232.38 
   0   8   2 8703.43  231.18 
   0   8  -2 8673.53  229.28 
   0   8   2 8929.91  234.88 
   1  -8   2 1699.83   50.89 
  -1  -8  -2 1704.93   55.19 
   1  -8   2 1744.33   53.09 
  -1  -8  -2 1651.93   52.09 
   1   8   2 1679.43   52.99 
   1   8   2 1706.03   54.99 
  -1   8  -2 1762.42   52.39 
  -1   8  -2 1665.83   51.59 
   1   8   2 1709.03   51.99 
   2  -8   2  652.33   24.50 
   2  -8   2  602.44   24.70 
  -2  -8  -2  636.04   27.40 
  -2  -8  -2  663.03   24.40 
   2   8   2  633.04   26.70 
  -2   8  -2  658.63   24.70 
  -2   8  -2  665.13   25.50 
   2   8   2  663.33   26.20 
   2   8   2  651.83   24.20 
   2   8   2  654.23   24.50 
   3  -8   2  684.93   26.50 
  -3  -8  -2  705.03   29.70 
   3  -8   2  671.53   26.60 
   3   8   2  657.63   25.30 
   3   8   2  685.53   28.00 
  -3   8  -2  674.33   27.40 
  -3   8  -2  671.03   25.90 
   3   8   2  692.83   24.60 
   4  -8   2 2682.53   81.39 
   4  -8   2 2746.63   81.79 
  -4  -8  -2 2780.42   85.99 
  -4   8  -2 2816.72   80.99 
   4   8   2 2800.82   77.79 
   4   8   2 2705.83   79.59 
   4   8   2 2697.23   82.89 
   5  -8   2 3463.65  101.79 
  -5  -8  -2 3533.95  106.69 
   5  -8   2 3504.45  102.29 
   5   8   2 3463.75  102.89 
   5   8   2 3513.35   97.19 
  -5   8  -2 3461.35  103.79 
  -5   8  -2 3485.95  101.19 
   5   8   2 3543.85   99.59 
  -6  -8  -2  761.32   29.20 
   6  -8   2  763.62   31.60 
  -6  -8  -2  804.32   36.00 
   6  -8   2  793.92   32.70 
  -6   8  -2  770.42   31.60 
   6   8   2  801.82   30.20 
   6   8   2  812.42   28.70 
   6   8   2  749.62   32.20 
  -7  -8  -2   85.69    7.80 
   7  -8   2   91.79   10.00 
  -7  -8  -2   69.39   11.60 
   7   8   2  103.79    9.10 
  -7   8  -2   84.29    9.20 
   7   8   2   86.39    8.60 
  -8  -8  -2   42.90    8.90 
  -8  -8  -2   30.90    5.40 
   8  -8   2   38.50    7.60 
   8   8   2   31.00    6.00 
  -8   8  -2   37.00    7.60 
   8   8   2   26.50    5.40 
  -9  -8  -2   75.89   13.20 
   9  -8   2   60.39   10.10 
  -9  -8  -2   39.50    8.70 
  -9   8  -2   53.39    9.60 
   9   8   2   46.40   12.00 
 -10  -8  -2  222.78   15.10 
 -10  -8  -2  225.28   26.70 
  10  -8   2  198.78   21.60 
 -10   8  -2  235.08   19.40 
  10   8   2  227.08   15.60 
  10   8   2  221.98   15.30 
  11  -8   2  173.48   16.70 
 -11  -8  -2  196.28   19.90 
  11   8   2  193.38   14.40 
 -11   8  -2  208.68   18.00 
  12  -8   2  334.27   23.90 
 -12  -8  -2  303.87   27.10 
 -12   8  -2  361.46   25.50 
  12   8   2  374.86   20.60 
 -13  -8  -2  198.28   23.20 
  13  -8   2  203.08   18.90 
  13   8   2  212.38   15.60 
 -13   8  -2  215.68   20.30 
 -14  -8  -2  257.27   25.30 
 -14   8  -2  208.28   21.70 
  14   8   2  233.28   16.60 
  15  -9  -2  156.08   20.10 
 -15  -9   2  200.48   23.90 
 -15   9   2  186.98   20.20 
  14  -9  -2   71.19   13.30 
 -14  -9   2   50.69   13.60 
 -14   9   2   80.39   13.80 
  14   9  -2   74.69    7.60 
 -13  -9   2   46.50    5.90 
 -13  -9   2   44.40   11.20 
  13  -9  -2   42.10    9.90 
 -13   9   2   49.60   10.00 
  13   9  -2   49.30    5.40 
  13   9  -2   39.80    5.50 
 -12  -9   2   24.10    7.40 
 -12  -9   2   20.30    3.50 
  12  -9  -2   15.20    6.70 
 -12   9   2   20.90    6.70 
  12   9  -2   15.50    3.70 
  12   9  -2   19.40    3.50 
  11  -9  -2    3.10    3.70 
 -11  -9   2    6.40    4.10 
 -11   9   2   -0.40    2.90 
  11   9  -2   -0.20    1.70 
 -10  -9   2    9.60    5.80 
  10  -9  -2    0.90    4.00 
  10   9  -2    6.40    1.90 
 -10   9   2   11.50    5.00 
  10   9  -2    7.20    2.10 
   9  -9  -2   27.50    7.10 
  -9  -9   2   27.60    8.10 
   9   9  -2   28.10    2.50 
   9   9  -2   26.80    2.30 
  -9   9   2   33.80    7.50 
   8  -9  -2   95.39   10.50 
  -8  -9   2   70.29   11.30 
  -8   9   2   75.79    8.90 
   7  -9  -2  496.45   25.20 
  -7  -9   2  434.16   25.80 
  -7   9   2  451.45   22.70 
  -6  -9   2 1422.36   54.09 
   6  -9  -2 1463.45   51.79 
   6  -9  -2 1426.56   50.39 
   6   9  -2 1430.86   51.19 
  -6   9   2 1562.64   50.49 
  -6   9   2 1384.76   48.50 
  -5  -9   2 1908.11   89.19 
   5  -9  -2 2007.40   70.29 
   5  -9  -2 2137.59   73.79 
   5   9  -2 2031.40   68.39 
  -5   9   2 2053.89   63.09 
  -5   9   2 1978.00   69.59 
   4  -9  -2  225.48   14.40 
   4  -9  -2  197.38   12.70 
  -4  -9   2  236.68   15.80 
   4   9  -2  213.08   14.10 
  -4   9   2  212.88   12.70 
   4   9  -2  222.28    6.80 
  -4   9   2  220.98   13.00 
   4   9  -2  216.98    6.80 
   3  -9  -2  988.30   35.80 
  -3  -9   2 1039.60   39.90 
  -3  -9   2 1032.40   29.80 
   3  -9  -2 1056.89   37.80 
   3   9  -2 1002.70   36.80 
   3   9  -2 1011.90   29.20 
  -3   9   2 1053.39   35.80 
   3   9  -2 1024.00   38.40 
  -3   9   2  967.00   35.00 
   2  -9  -2  466.35   20.20 
  -2  -9   2  484.05   22.70 
   2  -9  -2  443.86   20.80 
  -2  -9   2  430.76   15.80 
  -2   9   2  455.45   19.80 
  -2   9   2  449.26   19.50 
   2   9  -2  461.85   16.10 
   2   9  -2  457.45   20.50 
   2   9  -2  451.55   22.10 
   1  -9  -2  929.51   32.90 
  -1  -9   2  864.11   27.90 
   1  -9  -2  859.11   31.50 
  -1  -9   2  861.81   31.80 
   1   9  -2  895.41   28.40 
   1   9  -2  928.71   32.40 
   1   9  -2  847.32   33.70 
  -1   9   2  836.22   31.20 
  -1   9   2  861.71   30.90 
   0  -9  -2 1803.32   56.09 
   0  -9   2 1732.83   55.59 
   0  -9  -2 1724.93   55.39 
   0  -9   2 1822.32   52.79 
   0   9   2 1843.92   56.29 
   0   9  -2 1750.52   58.19 
   0   9   2 1847.32   58.99 
   0   9  -2 1818.02   53.39 
   0   9   2 1782.72   54.79 
   0   9  -2 1810.12   55.79 
  -1  -9  -2  153.68   10.20 
   1  -9   2  159.88   10.60 
   1  -9   2  160.98    9.70 
  -1  -9  -2  164.98   12.30 
   1   9   2  163.68   11.90 
   1   9   2  172.78   11.30 
   1   9   2  148.49    9.70 
  -1   9  -2  150.58   10.10 
  -1   9  -2  161.08   10.30 
   2  -9   2  853.21   30.60 
   2  -9   2  858.31   31.80 
  -2  -9  -2  828.42   30.20 
  -2  -9  -2  866.41   34.70 
   2   9   2  877.41   30.60 
   2   9   2  882.71   33.90 
  -2   9  -2  828.12   31.20 
   2   9   2  861.71   32.60 
  -2   9  -2  828.22   30.80 
   2   9   2  866.51   30.50 
   3  -9   2   10.20    2.90 
  -3  -9  -2    7.70    2.40 
   3  -9   2    6.70    2.80 
  -3  -9  -2   17.40    5.00 
  -3   9  -2    6.20    3.10 
   3   9   2   12.00    3.10 
  -3   9  -2    8.80    3.00 
   3   9   2   10.20    2.70 
   3   9   2   10.00    3.60 
   4  -9   2  124.69   10.10 
  -4  -9  -2  126.19   11.80 
   4  -9   2  112.89   14.70 
  -4   9  -2  109.39    9.30 
   4   9   2  105.89    8.40 
   4   9   2  110.09    7.90 
   4   9   2  115.29   12.90 
  -4   9  -2  122.89   10.80 
   5  -9   2  277.37   16.70 
  -5  -9  -2  309.17   20.10 
   5  -9   2  296.97   17.30 
  -5   9  -2  277.77   17.80 
  -5   9  -2  297.87   16.70 
   5   9   2  295.77   15.50 
   5   9   2  284.07   17.40 
   5   9   2  308.17   14.30 
   6  -9   2  265.37   17.00 
  -6  -9  -2  269.17   19.20 
  -6   9  -2  287.57   17.00 
   6   9   2  279.27   14.20 
   6   9   2  289.67   15.60 
   7  -9   2   14.60    4.60 
  -7  -9  -2   12.40    5.50 
  -7   9  -2   22.10    5.40 
   7   9   2   11.80    4.10 
   7   9   2   11.90    3.50 
   8  -9   2  567.64   28.40 
  -8  -9  -2  584.14   32.40 
  -8  -9  -2  531.15   24.00 
  -8   9  -2  544.55   27.50 
   8   9   2  480.25   22.80 
   8   9   2  562.54   24.80 
  -9  -9  -2  489.85   30.70 
  -9  -9  -2  448.36   25.80 
   9  -9   2  453.85   26.00 
  -9   9  -2  449.06   25.60 
   9   9   2  458.45   22.90 
   9   9   2  445.46   21.90 
 -10  -9  -2  329.07   25.90 
  10  -9   2  320.27   22.20 
 -10  -9  -2  322.77   18.70 
 -10   9  -2  327.97   22.30 
  10   9   2  312.27   18.30 
  10   9   2  359.66   20.10 
 -11  -9  -2   85.19   10.20 
  11  -9   2   88.59   11.80 
 -11  -9  -2   76.49   14.70 
 -11   9  -2   92.19   11.70 
  11   9   2   93.69   10.40 
  11   9   2  101.49   10.60 
 -12  -9  -2   44.10   11.20 
  12  -9   2   46.10    9.70 
 -12   9  -2   34.50    9.00 
  12   9   2   36.20    7.10 
  13  -9   2  129.39   16.20 
 -13  -9  -2   95.49   18.40 
  13   9   2  106.59   10.50 
 -13   9  -2   99.79   15.80 
 -14  -9  -2   -9.30    7.60 
  14  -9   2    7.10    6.30 
  14   9   2   13.20    4.70 
 -14   9  -2   19.40    7.60 
  15 -10  -2    8.90   13.40 
 -15 -10   2   16.70    8.60 
 -15  10   2    4.30    6.30 
 -14 -10   2   15.90    8.50 
  14 -10  -2   21.90    7.30 
 -14  10   2   16.80    7.80 
 -13 -10   2   40.20   10.40 
  13 -10  -2   38.70    9.80 
 -13  10   2   55.09   11.10 
  13  10  -2   42.30    4.20 
  12 -10  -2  217.98   20.20 
 -12 -10   2  196.48   20.60 
  12  10  -2  229.78   10.00 
  12  10  -2  233.48    9.90 
 -12  10   2  222.48   19.10 
 -11 -10   2    2.30    4.80 
  11 -10  -2    0.80    4.40 
 -11  10   2    2.90    3.20 
  11  10  -2    1.90    1.40 
 -10 -10   2   12.20    5.90 
  10 -10  -2    8.40    4.50 
 -10  10   2    5.90    3.60 
   9 -10  -2  214.18   17.30 
  -9 -10   2  197.18   18.30 
  -9  10   2  230.88   16.70 
  -8 -10   2  137.69   14.60 
   8 -10  -2  104.99   11.60 
  -8  10   2  116.89   11.00 
   7 -10  -2  207.48   15.80 
  -7 -10   2  195.18   17.00 
  -7  10   2  198.28   14.30 
   6 -10  -2   12.80    3.90 
  -6 -10   2   11.30    5.30 
   6 -10  -2   12.50    4.50 
   6  10  -2    6.20    2.90 
  -6  10   2   12.20    4.20 
  -6  10   2    4.80    3.00 
   5 -10  -2  599.24   27.00 
  -5 -10   2  678.93   31.50 
   5 -10  -2  659.53   29.40 
  -5  10   2  644.24   27.00 
   5  10  -2  600.54   28.50 
  -5  10   2  628.94   26.80 
  -4 -10   2  800.42   34.20 
  -4 -10   2  743.83   22.00 
   4 -10  -2  785.22   32.30 
   4 -10  -2  751.12   30.90 
  -4  10   2  798.52   30.30 
   4  10  -2  772.52   21.80 
  -4  10   2  718.73   39.10 
   4  10  -2  756.12   31.70 
   4  10  -2  770.02   34.60 
   3 -10  -2  145.79   11.60 
  -3 -10   2  140.69    7.20 
  -3 -10   2  148.79   12.50 
   3 -10  -2  142.89   10.60 
  -3  10   2  131.59    9.90 
  -3  10   2  149.79   10.60 
   3  10  -2  148.09   11.90 
   3  10  -2  155.58   11.50 
   3  10  -2  154.08    7.20 
   2 -10  -2 1324.17   45.60 
   2 -10  -2 1313.87   44.40 
  -2 -10   2 1329.17   47.60 
  -2 -10   2 1262.37   38.70 
  -2  10   2 1254.27   42.80 
   2  10  -2 1309.37   44.90 
   2  10  -2 1307.87   47.10 
  -2  10   2 1362.76   44.30 
   1 -10  -2  115.89    9.30 
  -1 -10   2  128.49    7.80 
  -1 -10   2  112.69    9.20 
   1 -10  -2  125.89   10.00 
  -1  10   2  122.69   10.70 
   1  10  -2  140.89    8.40 
   1  10  -2  136.09   11.10 
   1  10  -2  126.49    9.80 
  -1  10   2  132.09    9.40 
  -1  10   2  134.59   10.00 
   0 -10   2  374.86   18.70 
   0 -10   2  367.26   16.10 
   0 -10  -2  393.36   18.90 
   0 -10  -2  377.56   18.40 
   0  10  -2  386.26   20.60 
   0  10   2  376.26   20.50 
   0  10  -2  391.26   18.60 
   0  10  -2  377.96   16.60 
   0  10   2  384.96   17.60 
   0  10   2  388.26   18.80 
   1 -10   2 1537.35   51.09 
  -1 -10  -2 1618.54   50.79 
   1 -10   2 1583.84   49.00 
   1  10   2 1541.65   49.40 
  -1  10  -2 1610.34   50.99 
   1  10   2 1474.55   51.09 
   1  10   2 1603.54   54.29 
  -1  10  -2 1593.54   49.70 
   2 -10   2  348.17   17.90 
  -2 -10  -2  369.26   20.50 
  -2 -10  -2  331.17   16.60 
   2 -10   2  347.27   16.90 
  -2  10  -2  364.86   17.70 
   2  10   2  381.76   20.20 
   2  10   2  349.87   18.40 
   2  10   2  338.27   16.50 
  -2  10  -2  329.37   17.40 
   3 -10   2    2.50    1.70 
  -3 -10  -2    0.40    2.50 
   3 -10   2   -2.00    1.20 
  -3 -10  -2    3.10    1.90 
   3  10   2    1.70    1.60 
   3  10   2    0.90    2.40 
   3  10   2    3.00    1.90 
  -3  10  -2    2.00    1.90 
   3  10   2    6.10    2.30 
  -3  10  -2    5.60    3.60 
   4 -10   2  364.56   18.80 
   4 -10   2  349.96   18.90 
  -4 -10  -2  332.77   21.00 
   4  10   2  350.06   16.00 
  -4  10  -2  354.36   19.70 
   4  10   2  370.86   17.40 
   4  10   2  339.97   19.80 
  -4  10  -2  348.27   18.20 
   5 -10   2  710.53   31.30 
  -5 -10  -2  754.42   35.60 
   5 -10   2  779.42   32.00 
   5  10   2  754.62   32.90 
   5  10   2  752.72   29.00 
   5  10   2  760.42   27.20 
  -5  10  -2  763.32   31.10 
  -6 -10  -2   80.49   10.60 
   6 -10   2   79.69    9.30 
   6  10   2   93.49    8.40 
  -6  10  -2   82.89    9.10 
   6  10   2   97.09    7.90 
   7 -10   2  166.58   14.20 
  -7 -10  -2  210.88   17.70 
  -7  10  -2  200.58   14.80 
   7  10   2  157.78   11.10 
   7  10   2  205.68   13.00 
   8 -10   2    5.10    3.80 
   8  10   2    3.10    3.10 
   8  10   2    6.00    2.70 
  -8  10  -2    2.30    3.00 
  -9 -10  -2   58.89   12.00 
   9 -10   2   59.59   12.40 
   9  10   2   77.89    8.60 
   9  10   2   58.99    7.90 
  -9  10  -2   64.39   11.00 
 -10 -10  -2    3.70    3.80 
  10 -10   2    2.00    4.20 
 -10 -10  -2    5.60    4.70 
  10  10   2    3.00    3.60 
 -10  10  -2   10.80    4.90 
  10  10   2    0.80    3.70 
  11 -10   2   59.99   10.70 
 -11 -10  -2   44.00    7.80 
 -11 -10  -2   56.39   12.50 
  11  10   2   46.90    8.20 
  11  10   2   48.10    7.50 
 -11  10  -2   58.99   11.10 
 -12 -10  -2   93.69   17.50 
  12 -10   2   85.29   14.00 
 -12  10  -2   96.79   12.70 
  12  10   2   97.99   10.50 
  13 -10   2   17.20    8.10 
 -13 -10  -2   24.00   10.70 
  13  10   2   33.50    6.60 
 -13  10  -2   38.30    9.80 
  15 -11  -2    3.50    6.00 
 -15 -11   2    1.40    7.50 
 -15  11   2    0.70    5.40 
  14 -11  -2    7.70    6.00 
 -14 -11   2    9.60    8.90 
 -14  11   2    6.20    5.60 
  13 -11  -2   62.69   11.50 
 -13 -11   2   71.79   15.40 
 -13  11   2   74.29   12.90 
 -12 -11   2   -0.90    4.50 
  12 -11  -2    0.90    3.60 
 -12  11   2    8.90    4.90 
 -11 -11   2   12.60    5.40 
  11 -11  -2    3.10    4.10 
 -11  11   2    4.60    3.10 
 -10 -11   2   35.90   11.90 
  10 -11  -2   62.69   11.30 
   9 -11  -2   63.99   10.80 
  -9 -11   2   49.70   10.50 
  -9  11   2   74.99    9.50 
  -8 -11   2   74.09   12.50 
   8 -11  -2   73.09    9.80 
  -8  11   2   72.39    8.80 
  -7 -11   2  140.39   14.30 
   7 -11  -2  135.99   13.30 
  -7  11   2  143.79   12.20 
   6 -11  -2  680.53   32.00 
  -6 -11   2  666.83   34.10 
  -6  11   2  719.93   30.20 
  -5 -11   2  355.06   22.30 
   5 -11  -2  354.56   20.90 
   5 -11  -2  335.77   19.20 
  -5  11   2  341.77   18.50 
   5  11  -2  358.06   20.90 
  -5  11   2  373.46   19.30 
  -4 -11   2   10.40    1.90 
   4 -11  -2    9.90    3.50 
   4 -11  -2    8.70    3.50 
  -4 -11   2    6.50    4.20 
   4  11  -2   14.70    2.10 
   4  11  -2   16.40    4.40 
   4  11  -2   15.20    4.30 
  -4  11   2   11.60    3.80 
  -4  11   2    8.20    3.20 
   3 -11  -2  107.29   10.00 
   3 -11  -2   98.69    9.80 
  -3 -11   2  110.39   11.10 
  -3 -11   2  102.69    6.30 
  -3  11   2   96.09    8.80 
  -3  11   2   79.69    7.80 
   3  11  -2   91.89    9.10 
   3  11  -2   99.59    6.10 
   3  11  -2  127.89   21.50 
  -2 -11   2  732.33   24.60 
   2 -11  -2  711.93   29.10 
   2 -11  -2  730.43   30.30 
   2  11  -2  725.83   29.80 
  -2  11   2  734.63   29.10 
   2  11  -2  706.73   24.00 
   2  11  -2  707.03   31.50 
  -2  11   2  670.13   27.40 
   1 -11  -2 1326.27   47.30 
  -1 -11   2 1393.16   48.00 
   1 -11  -2 1441.86   48.60 
  -1 -11   2 1411.26   43.50 
  -1  11   2 1430.56   51.09 
  -1  11   2 1484.25   48.30 
   1  11  -2 1412.66   43.40 
   1  11  -2 1391.96   48.00 
   1  11  -2 1439.86   51.19 
  -1  11   2 1392.96   46.10 
   0 -11   2 2495.15   73.09 
   0 -11  -2 2592.14   77.29 
   0 -11  -2 2502.65   76.89 
   0 -11   2 2509.95   77.39 
   0  11   2 2584.84   77.49 
   0  11  -2 2560.44   76.99 
   0  11  -2 2504.85   73.39 
   0  11   2 2500.45   80.49 
   0  11  -2 2552.04   80.99 
   0  11   2 2526.95   74.99 
   1 -11   2  471.15   22.60 
   1 -11   2  532.15   21.50 
  -1 -11  -2  508.55   22.60 
  -1  11  -2  533.85   23.20 
  -1  11  -2  483.45   21.30 
   1  11   2  511.65   21.60 
   1  11   2  483.25   24.90 
   1  11   2  497.15   23.40 
   2 -11   2   14.00    3.80 
  -2 -11  -2    9.40    4.00 
  -2 -11  -2   12.80    3.20 
   2 -11   2   10.40    3.40 
   2  11   2    9.60    3.90 
  -2  11  -2   12.70    3.60 
   2  11   2   12.60    4.00 
   2  11   2   10.70    3.20 
  -2  11  -2   13.50    4.20 
  -3 -11  -2  267.57   14.20 
   3 -11   2  251.67   15.20 
   3 -11   2  246.18   15.50 
  -3 -11  -2  263.57   18.20 
  -3  11  -2  260.47   16.10 
   3  11   2  263.77   14.10 
   3  11   2  270.57   17.60 
   3  11   2  272.57   16.80 
  -3  11  -2  265.27   15.50 
   3  11   2  256.97   14.20 
   4 -11   2   80.69    9.20 
  -4 -11  -2   84.09   10.10 
   4 -11   2   89.29    8.90 
  -4  11  -2   90.49    8.90 
   4  11   2   82.19    7.10 
  -4  11  -2   76.49    9.30 
   4  11   2   82.19    9.60 
   4  11   2   95.59    8.30 
   5 -11   2  659.53   29.50 
  -5 -11  -2  662.53   33.50 
   5  11   2  676.63   25.00 
   5  11   2  671.03   26.80 
  -5  11  -2  642.24   28.60 
  -6 -11  -2   93.69   11.60 
   6 -11   2  104.09   10.60 
  -6  11  -2   83.09    9.00 
   6  11   2   81.89    7.20 
   6  11   2   65.99    7.40 
  -7 -11  -2    2.40    3.70 
   7 -11   2    2.40    2.90 
   7  11   2   -4.10    2.00 
  -7  11  -2    1.10    2.80 
   7  11   2    1.50    1.90 
   8 -11   2   45.80    8.60 
  -8 -11  -2   42.90    9.80 
  -8  11  -2   61.49   10.40 
   8  11   2   41.10    6.50 
   8  11   2   59.59    7.50 
  -9 -11  -2  268.57   43.70 
   9 -11   2  258.07   19.70 
   9  11   2  236.48   15.40 
   9  11   2  222.48   14.30 
 -10 -11  -2  418.26   30.60 
  10 -11   2  419.46   26.60 
  10  11   2  437.76   22.30 
 -10  11  -2  427.66   26.20 
  10  11   2  401.06   25.30 
  11 -11   2   24.70    8.20 
 -11 -11  -2   43.60   11.00 
 -11  11  -2   39.20    9.40 
  11  11   2   31.40    6.20 
  11  11   2   37.10    7.30 
 -12 -11  -2   28.90    9.20 
  12 -11   2   19.80    7.50 
 -12  11  -2    5.90    5.00 
  12  11   2   17.80    5.10 
  13 -11   2   10.00    9.60 
 -13 -11  -2    4.00    6.40 
  13  11   2   14.50    4.60 
 -13  11  -2   14.10    7.10 
  14 -12  -2    8.20    5.70 
 -14 -12   2   10.20    6.70 
 -14  12   2   11.90    6.70 
  13 -12  -2   -3.10    4.90 
 -13 -12   2   13.80    6.50 
 -13  12   2    6.30    5.10 
  12 -12  -2  982.00   49.30 
 -12 -12   2 1065.69   54.59 
 -12  12   2 1013.20   47.00 
  11 -12  -2 1177.98   53.89 
 -11 -12   2 1275.57   59.89 
 -11  12   2 1177.58   50.79 
 -10 -12   2  810.62   43.70 
  10 -12  -2  735.83   39.00 
 -10  12   2  819.02   37.90 
  -9 -12   2   82.99   14.30 
   9 -12  -2   96.99   12.20 
  -9  12   2  101.79   11.20 
  -8 -12   2   11.00    5.40 
   8 -12  -2   15.50    5.40 
  -8  12   2   12.90    4.70 
  -7 -12   2  705.23   36.40 
   7 -12  -2  684.93   33.60 
  -7  12   2  691.83   31.30 
   6 -12  -2   96.49   11.00 
  -6 -12   2   90.09   11.60 
  -6  12   2   94.79    9.70 
   5 -12  -2  252.97   17.80 
  -5 -12   2  261.67   19.60 
  -5  12   2  290.17   17.20 
   5  12  -2  256.07   17.90 
   5  12  -2  267.17    8.30 
   4 -12  -2  361.96   20.80 
  -4 -12   2  356.96   22.40 
   4 -12  -2  346.27   19.30 
  -4 -12   2  340.07   13.00 
   4  12  -2  341.97   20.20 
   4  12  -2  345.37   21.20 
   4  12  -2  347.07   12.50 
  -4  12   2  352.56   18.90 
  -4  12   2  341.07   18.30 
   3 -12  -2    2.60    2.10 
  -3 -12   2    9.00    2.20 
   3 -12  -2    6.50    2.90 
  -3 -12   2    7.60    3.80 
   3  12  -2    3.20    3.30 
   3  12  -2    5.20    2.90 
  -3  12   2    1.80    2.10 
  -3  12   2    0.00    1.80 
   2 -12  -2    3.30    2.50 
  -2 -12   2    5.60    2.10 
   2 -12  -2    4.50    2.40 
   2  12  -2    5.00    3.60 
   2  12  -2   10.20    3.80 
   2  12  -2   15.40    3.20 
  -2  12   2    6.50    3.60 
  -2  12   2    5.60    2.80 
   1 -12  -2  720.13   29.90 
   1 -12  -2  589.64   37.40 
  -1 -12   2  724.03   25.70 
   1  12  -2  674.13   25.00 
   1  12  -2  699.63   31.30 
  -1  12   2  665.53   27.10 
  -1  12   2  710.73   29.90 
   0 -12  -2  388.56   19.80 
   0 -12   2  388.46   17.50 
   0  12   2  350.16   32.60 
   0  12  -2  367.46   17.20 
   0  12   2  357.76   17.70 
   0  12  -2  380.96   19.80 
   0  12   2  370.16   19.80 
   0  12  -2  337.67   29.80 
  -1 -12  -2 1109.89   39.40 
   1 -12   2 1098.59   37.60 
   1 -12   2 1020.90   39.60 
   1  12   2 1060.19   37.40 
  -1  12  -2 1028.80   37.20 
   1  12   2 1122.69   44.20 
  -2 -12  -2   56.39    9.60 
  -2 -12  -2   59.59    6.70 
   2 -12   2   63.79    7.30 
   2 -12   2   64.49    7.00 
   2  12   2   59.09    9.50 
   2  12   2   58.09    8.90 
  -2  12  -2   52.79   11.80 
  -2  12  -2   49.50    6.40 
   2  12   2   58.29    6.50 
  -3 -12  -2  728.23   34.50 
  -3 -12  -2  733.63   28.50 
   3 -12   2  742.43   30.40 
   3 -12   2  709.63   31.30 
   3  12   2  702.33   33.00 
  -3  12  -2  694.03   30.50 
   3  12   2  779.72   28.80 
   3  12   2  716.43   28.20 
  -3  12  -2  741.13   30.40 
   3  12   2  757.32   32.70 
   4 -12   2 1519.45   64.59 
  -4 -12  -2 1619.64   61.49 
   4 -12   2 1706.23   56.89 
   4  12   2 1581.84   61.49 
   4  12   2 1652.63   53.19 
   4  12   2 1768.12   60.09 
   4  12   2 1694.03   52.29 
  -4  12  -2 1715.53   56.39 
   5 -12   2  765.62   33.10 
  -5 -12  -2  761.42   37.40 
   5  12   2  730.33   29.10 
  -5  12  -2  758.82   32.10 
   5  12   2  723.93   27.20 
   6 -12   2    3.80    3.30 
  -6 -12  -2    4.10    4.40 
   6  12   2   12.70    3.30 
   6  12   2    9.50    2.70 
  -6  12  -2    4.50    3.40 
   7 -12   2   -2.30    2.60 
  -7 -12  -2    1.80    3.30 
   7  12   2   -1.50    2.70 
  -7  12  -2    0.00    2.20 
   7  12   2    3.60    2.40 
  -8 -12  -2   15.40    5.70 
   8 -12   2   15.30    5.10 
   8  12   2    4.20    3.30 
  -8  12  -2    8.30    4.50 
   8  12   2   12.00    4.00 
  -9 -12  -2  115.79   17.70 
   9 -12   2   77.99   12.40 
   9  12   2   77.69    8.80 
   9  12   2   95.39    9.20 
  -9  12  -2   99.89   11.60 
 -10 -12  -2   30.40    9.30 
  10 -12   2   33.20    8.50 
  10  12   2   27.10    9.80 
 -10  12  -2   32.00    8.10 
 -11 -12  -2  252.07   24.40 
  11 -12   2  207.58   19.70 
  11  12   2  211.58   14.30 
 -11  12  -2  212.58   19.50 
  11  12   2  229.68   15.90 
 -12 -12  -2   11.30    6.70 
  12 -12   2   10.70    6.00 
 -12  12  -2    8.40    5.60 
  12  12   2   -1.30    3.50 
 -13 -12  -2   61.79   15.80 
  13 -12   2   67.19   12.30 
  13  12   2   83.59    9.30 
 -13  12  -2   85.69   14.80 
  14 -13  -2   22.80    9.00 
 -14 -13   2   51.69   13.80 
 -14  13   2   56.29   11.70 
  13 -13  -2   32.90    9.50 
 -13 -13   2   11.90    7.70 
 -13  13   2   36.20    8.70 
 -12 -13   2   15.50    8.40 
 -12  13   2   12.60    6.40 
 -11 -13   2   14.80    7.10 
  11 -13  -2   42.90   10.40 
 -11  13   2   28.00    7.40 
  10 -13  -2  191.98   18.60 
 -10 -13   2  230.58   22.50 
 -10  13   2  214.28   17.60 
   9 -13  -2  394.66   26.20 
  -9 -13   2  380.16   30.10 
  -9  13   2  383.06   25.10 
   8 -13  -2  325.07   23.00 
  -8 -13   2  373.36   26.10 
  -8  13   2  355.26   21.60 
   7 -13  -2 1419.86   56.89 
  -7 -13   2 1560.54   62.69 
  -7  13   2 1486.85   54.19 
  -6 -13   2 3699.43  119.69 
   6 -13  -2 3775.82  115.69 
  -6  13   2 3674.73  110.99 
  -5 -13   2 4810.62  146.79 
   5 -13  -2 4953.60  143.59 
   5  13  -2 4886.41  125.79 
   5  13  -2 4859.51  125.89 
  -5  13   2 4902.71  139.69 
   5  13  -2 4731.43  142.59 
  -4 -13   2  930.41   41.40 
  -4 -13   2  834.22   27.40 
   4 -13  -2  914.01   37.90 
  -4  13   2  831.02   33.90 
   4  13  -2  848.42   26.50 
   4  13  -2  821.72   36.30 
  -4  13   2  878.31   35.00 
  -3 -13   2  285.17   19.80 
   3 -13  -2  231.58   16.10 
   3 -13  -2  278.67   18.00 
  -3 -13   2  275.37   12.80 
   3  13  -2  251.57   17.10 
   3  13  -2  288.67   19.30 
  -3  13   2  264.27   16.50 
   3  13  -2  270.97   12.10 
  -3  13   2  301.27   16.40 
   2 -13  -2 2571.84   84.19 
   2 -13  -2 2558.74   81.19 
  -2 -13   2 2587.64   74.79 
   2  13  -2 2565.04   85.09 
  -2  13   2 2540.35   78.29 
   2  13  -2 2571.34   73.79 
   2  13  -2 2719.33   82.69 
  -2  13   2 2702.23   81.29 
  -1 -13   2 1096.29   36.80 
   1 -13  -2 1078.69   41.30 
   1 -13  -2 1019.20   40.40 
  -1 -13   2 1083.39   41.30 
   1  13  -2 1073.29   44.30 
  -1  13   2 1116.59   44.70 
   1  13  -2 1062.69   41.10 
   1  13  -2 1100.69   36.40 
  -1  13   2 1077.99   38.50 
  -1  13   2 1135.99   41.50 
   0 -13  -2  577.14   26.50 
   0 -13  -2  541.15   25.20 
   0 -13   2  512.85   25.20 
   0 -13   2  543.25   22.80 
   0  13   2  493.85   24.80 
   0  13   2  553.74   28.10 
   0  13   2  551.34   23.30 
   0  13  -2  496.35   27.30 
   0  13  -2  511.65   22.40 
   0  13  -2  540.05   25.30 
   1 -13   2  184.58   12.20 
   1 -13   2  171.78   13.10 
  -1 -13  -2  188.88   13.10 
   1  13   2  178.78   13.70 
   1  13   2  183.28   12.10 
  -1  13  -2  178.48   12.10 
   1  13   2  189.38   15.30 
  -1  13  -2  173.58   13.00 
   2 -13   2    5.50    3.20 
  -2 -13  -2    2.10    3.10 
  -2 -13  -2   -3.00    1.80 
   2 -13   2   -0.10    2.00 
   2  13   2   -0.90    3.20 
   2  13   2   -0.50    2.00 
  -2  13  -2    4.10    2.80 
   2  13   2    2.40    2.70 
  -2  13  -2   -0.70    2.00 
  -3 -13  -2  651.83   32.90 
   3 -13   2  640.94   28.10 
  -3 -13  -2  618.74   26.00 
   3 -13   2  557.84   34.00 
  -3  13  -2  629.74   28.50 
   3  13   2  650.63   33.40 
  -3  13  -2  682.93   28.80 
   3  13   2  626.84   26.30 
   3  13   2  643.54   30.40 
   3  13   2  604.44   25.50 
  -4 -13  -2 3107.79   91.39 
   4 -13   2 3141.29   96.19 
  -4 -13  -2 3066.39  102.59 
  -4  13  -2 3223.28   96.29 
   4  13   2 3210.58   91.49 
   4  13   2 3294.97  100.79 
   4  13   2 3100.19   91.89 
   5 -13   2 2515.05   82.29 
  -5 -13  -2 2533.35   88.89 
   5  13   2 2529.55   85.59 
   5  13   2 2656.73   75.99 
   5  13   2 2561.34   77.49 
  -5  13  -2 2695.63   82.89 
  -6 -13  -2 1126.79   50.39 
   6 -13   2 1187.88   45.70 
   6  13   2  952.60   36.20 
   6  13   2 1157.08   40.00 
  -6  13  -2 1170.18   44.30 
   7 -13   2  233.48   18.00 
  -7 -13  -2  230.78   20.60 
  -7  13  -2  260.37   18.00 
   7  13   2  189.78   12.10 
   7  13   2  258.17   14.90 
   8 -13   2 1352.76   54.99 
  -8 -13  -2 1479.45   62.69 
   8  13   2 1445.96   48.60 
   8  13   2 1359.96   46.00 
  -8  13  -2 1377.06   54.39 
   9 -13   2 1648.64   63.29 
  -9 -13  -2 1618.34   69.49 
   9  13   2 1575.04   54.29 
  -9  13  -2 1630.24   61.49 
   9  13   2 1619.84   52.69 
  10 -13   2  874.71   43.20 
 -10 -13  -2  832.02   47.70 
  10  13   2  862.21   35.00 
  10  13   2  849.72   32.90 
 -10  13  -2  946.01   42.90 
 -11 -13  -2  460.35   35.10 
  11 -13   2  499.15   31.80 
  11  13   2  505.25   22.90 
 -11  13  -2  463.75   29.50 
 -12 -13  -2   82.99   16.50 
  12 -13   2  120.39   16.00 
  12  13   2  121.79   10.30 
 -12  13  -2  128.89   15.30 
  13 -13   2   61.39   12.90 
 -13 -13  -2   57.89   11.80 
 -13  13  -2   49.80   10.70 
  14 -14  -2   61.99   13.20 
 -14 -14   2   86.99   17.40 
 -14  14   2   74.19   13.20 
  13 -14  -2   89.69   16.80 
 -13 -14   2  101.29   31.30 
  12 -14  -2  862.21   47.10 
 -12 -14   2  891.51   51.49 
 -12  14   2  937.41   45.00 
 -11 -14   2 1344.67   64.89 
  11 -14  -2 1357.26   60.59 
 -11  14   2 1392.46   57.29 
  10 -14  -2  438.36   29.30 
 -10 -14   2  397.86   30.90 
 -10  14   2  463.75   27.60 
   9 -14  -2  148.59   15.60 
  -9 -14   2  178.68   18.70 
  -9  14   2  126.19   13.40 
  -8 -14   2  146.79   16.80 
   8 -14  -2  144.19   15.10 
  -8  14   2  135.99   13.30 
  -7 -14   2   -0.50    3.80 
   7 -14  -2    2.30    2.60 
  -7  14   2   16.40    5.00 
   6 -14  -2    0.30    3.80 
  -6 -14   2    4.30    3.90 
   6  14  -2   -2.80    2.70 
  -6  14   2    6.70    3.70 
   5 -14  -2  430.36   24.70 
  -5 -14   2  400.76   26.10 
  -5  14   2  387.06   21.90 
   5  14  -2  367.26   23.10 
   5  14  -2  387.46   13.40 
   4 -14  -2  424.26   24.00 
  -4 -14   2  370.16   24.70 
  -4 -14   2  393.06   15.80 
   4  14  -2  370.76   19.70 
  -4  14   2  390.16   21.30 
   4  14  -2  387.06   22.90 
  -3 -14   2    5.10    2.40 
   3 -14  -2    5.70    3.30 
  -3 -14   2    6.40    4.30 
  -3  14   2   12.30    4.40 
  -3  14   2   10.90    3.50 
   3  14  -2   14.70    4.70 
   3  14  -2    8.40    2.70 
  -2 -14   2  464.35   19.80 
   2 -14  -2  443.16   24.10 
   2 -14  -2  420.96   23.20 
   2  14  -2  457.55   24.20 
  -2  14   2  429.56   21.20 
   2  14  -2  466.55   18.90 
  -2  14   2  448.86   23.40 
   2  14  -2  475.95   27.20 
   1 -14  -2 4455.75  131.29 
  -1 -14   2 4649.83  125.89 
   1 -14  -2 3938.91  140.09 
  -1 -14   2 4435.06  131.49 
   1  14  -2 4519.95  124.59 
  -1  14   2 4556.64  127.59 
   1  14  -2 4499.15  136.09 
  -1  14   2 4623.14  136.69 
  -1  14   2 4743.03  131.99 
   1  14  -2 4655.93  132.09 
   0 -14  -2 3075.59   95.49 
   0 -14  -2 3122.09   95.09 
   0 -14   2 3110.19   95.79 
   0 -14   2 3090.09   90.99 
   0  14  -2 3114.79   90.59 
   0  14   2 3198.58   96.29 
   0  14   2 3083.59   91.49 
   0  14  -2 3177.98   95.59 
   0  14  -2 3050.79   99.79 
   0  14   2 3137.79  100.19 
   1 -14   2  197.98   14.30 
   1 -14   2  219.48   15.20 
  -1 -14  -2  220.58   14.70 
   1  14   2  208.18   13.10 
   1  14   2  212.38   15.40 
  -1  14  -2  173.78   16.10 
  -1  14  -2  207.98   14.70 
  -1  14  -2  179.18   16.00 
   1  14   2  202.58   16.60 
  -2 -14  -2 1016.90   37.70 
   2 -14   2  932.01   37.00 
  -2  14  -2  940.31   37.20 
  -2  14  -2 1009.50   39.10 
   2  14   2  990.90   40.50 
   2  14   2  979.00   35.80 
  -3 -14  -2  690.03   35.30 
  -3 -14  -2  716.63   29.10 
   3 -14   2  713.53   31.00 
  -3  14  -2  692.13   30.90 
   3  14   2  680.73   28.00 
   3  14   2  747.53   33.90 
  -4 -14  -2 2032.80   74.39 
  -4 -14  -2 2006.00   62.79 
   4 -14   2 2001.80   67.59 
  -4  14  -2 2034.80   67.49 
   4  14   2 2030.90   62.79 
   4  14   2 1996.30   63.09 
   4  14   2 2046.50   70.99 
  -5 -14  -2  925.71   44.40 
   5 -14   2  947.61   39.90 
   5  14   2  964.60   42.50 
  -5  14  -2  983.30   39.50 
   5  14   2  914.61   34.70 
  -6 -14  -2  256.17   21.20 
   6 -14   2  231.58   17.70 
   6  14   2  254.57   19.60 
  -6  14  -2  240.28   17.10 
   6  14   2  253.47   14.90 
   6  14   2  213.18   12.60 
   7 -14   2    2.50    3.70 
  -7 -14  -2   -3.80    3.90 
   7  14   2    1.30    1.90 
  -7  14  -2    2.50    2.60 
   7  14   2    3.70    2.70 
  -8 -14  -2   28.20    8.60 
   8 -14   2   58.09   10.60 
  -8  14  -2   34.90    8.00 
   8  14   2   43.00    6.70 
   8  14   2   50.49    7.10 
   9 -14   2  162.48   16.90 
  -9 -14  -2  200.08   20.30 
   9  14   2  190.48   12.70 
   9  14   2  192.58   13.30 
  -9  14  -2  168.38   16.00 
  10 -14   2  645.84   36.40 
 -10 -14  -2  630.14   40.60 
  10  14   2  633.54   26.40 
 -10  14  -2  654.83   34.90 
  10  14   2  598.24   27.40 
 -11 -14  -2  166.08   22.00 
  11 -14   2  163.78   17.20 
 -11  14  -2  166.48   17.30 
  12 -14   2   17.60    7.40 
 -12  14  -2   44.80   16.00 
  12  14   2   43.40    6.40 
  13 -15  -2   30.60   10.20 
 -13 -15   2   14.80   11.10 
 -13  15   2   44.40   10.30 
 -12 -15   2   54.99   13.50 
  12 -15  -2   56.09   12.40 
 -12  15   2   73.49   12.90 
  11 -15  -2  230.18   23.00 
 -11 -15   2  204.08   23.00 
 -11  15   2  216.68   19.30 
  10 -15  -2   57.49   11.60 
 -10 -15   2   59.19   13.90 
 -10  15   2   50.39    9.90 
  -9 -15   2  269.97   24.10 
   9 -15  -2  287.67   23.20 
  -9  15   2  303.87   21.10 
  -8 -15   2  593.74   59.39 
   8 -15  -2  756.42   59.29 
  -8  15   2  839.02   54.29 
  -7 -15   2  361.46   26.80 
   7 -15  -2  390.26   25.70 
   7  15  -2  426.16   26.90 
  -7  15   2  392.56   23.20 
  -6 -15   2 2092.89   77.49 
   6 -15  -2 1933.11   72.29 
  -6  15   2 2057.39   69.49 
   6  15  -2 2026.80   73.19 
  -5 -15   2 1952.10   56.39 
  -5 -15   2 2054.99   76.19 
   5 -15  -2 2120.39   73.19 
   5  15  -2 2011.00   71.79 
   5  15  -2 2072.39   56.79 
   5  15  -2 2020.10   56.09 
  -5  15   2 2043.60   68.89 
  -4 -15   2  389.56   25.50 
   4 -15  -2  422.66   24.50 
  -4 -15   2  376.66   16.10 
   4  15  -2  369.96   15.20 
   4  15  -2  388.36   23.40 
  -4  15   2  377.06   21.70 
   3 -15  -2  353.36   21.80 
  -3 -15   2  320.37   15.70 
   3  15  -2  347.97   21.50 
   3  15  -2  323.87   14.90 
  -3  15   2  350.86   20.50 
   2 -15  -2   37.60    7.60 
  -2 -15   2   34.10    5.40 
   2  15  -2   34.90    7.50 
   2  15  -2   47.20    5.80 
  -2  15   2   32.30    5.90 
  -2  15   2   43.10    7.90 
  -1 -15   2  208.58   13.10 
   1 -15  -2  185.08   14.60 
  -1  15   2  186.38   14.80 
   1  15  -2  198.88   15.30 
  -1  15   2  203.28   13.60 
   1  15  -2  186.98   12.10 
   0 -15   2  276.87   15.60 
   0 -15  -2  255.37   20.80 
   0  15  -2  230.98   14.60 
   0  15   2  267.97   17.90 
   0  15   2  249.58   15.00 
   0  15  -2  261.77   17.50 
   1 -15   2  710.53   30.00 
  -1 -15  -2  699.93   30.90 
  -1  15  -2  697.83   29.70 
   1  15   2  713.03   33.00 
  -1  15  -2  739.23   32.40 
   1  15   2  701.73   28.70 
  -2 -15  -2  120.79   11.00 
   2 -15   2  147.89   12.00 
  -2  15  -2  128.39   11.30 
  -2  15  -2  121.49   11.40 
   2  15   2  122.19   10.00 
   2  15   2  116.59   12.10 
  -3 -15  -2 1317.57   55.39 
  -3 -15  -2 1361.66   47.10 
   3 -15   2 1371.36   49.70 
  -3  15  -2 1326.57   49.70 
   3  15   2 1368.06   52.69 
   3  15   2 1324.47   45.60 
   4 -15   2  672.83   31.20 
  -4 -15  -2  645.74   27.00 
  -4 -15  -2  642.64   34.80 
  -4  15  -2  646.44   30.40 
   4  15   2  612.74   26.30 
   4  15   2  655.63   26.90 
   4  15   2  609.14   32.20 
  -5 -15  -2  588.54   34.10 
   5 -15   2  588.64   29.40 
   5  15   2  457.25   22.00 
  -5  15  -2  566.54   28.30 
   5  15   2  562.64   31.00 
   5  15   2  564.94   24.30 
   6 -15   2  251.17   18.60 
  -6 -15  -2  196.18   19.20 
   6  15   2  220.98   13.70 
  -6  15  -2  231.18   16.90 
   6  15   2  245.08   19.50 
   6  15   2  189.48   12.00 
   7 -15   2 1039.00   45.00 
  -7 -15  -2 1031.00   52.99 
  -7  15  -2  956.10   49.20 
   7  15   2 1053.29   37.30 
   7  15   2  897.91   34.00 
   8 -15   2  169.08   16.10 
  -8 -15  -2  163.68   18.90 
  -8  15  -2  164.28   14.80 
   8  15   2  146.49   11.50 
   8  15   2  156.18   11.10 
  -9 -15  -2  220.78   22.80 
   9 -15   2  201.28   18.90 
   9  15   2  229.88   14.90 
   9  15   2  234.48   13.90 
  -9  15  -2  214.58   19.00 
 -10 -15  -2  688.23   43.90 
  10 -15   2  725.13   40.10 
  10  15   2  705.73   28.30 
 -10  15  -2  729.53   38.10 
  11 -15   2  418.36   29.60 
 -11 -15  -2  387.76   32.90 
 -11  15  -2  358.96   25.90 
  11  15   2  357.46   18.20 
  12 -15   2   66.29   12.40 
 -12 -15  -2   44.90   12.90 
 -12  15  -2   44.20   10.60 
 -13 -16   2  104.39   18.80 
  13 -16  -2  103.29   17.60 
 -13  16   2  130.69   16.30 
 -12 -16   2   72.89   14.90 
  12 -16  -2   55.59   13.20 
 -12  16   2   44.40   10.10 
 -11 -16   2   48.10   13.50 
  11 -16  -2   48.10   11.40 
 -11  16   2   55.39   11.00 
 -10 -16   2  106.89   17.60 
  10 -16  -2  122.99   16.20 
 -10  16   2  139.29   14.30 
   9 -16  -2  146.19   16.50 
  -9 -16   2  154.98   18.10 
  -9  16   2  126.59   13.80 
   8 -16  -2    4.10    5.20 
  -8 -16   2    9.20    5.00 
  -8  16   2    6.70    3.90 
   8  16  -2    8.30    5.50 
   7 -16  -2  184.78   17.30 
  -7 -16   2  154.88   17.40 
  -7  16   2  168.78   14.80 
   7  16  -2  155.08   15.90 
  -6 -16   2   -0.60    4.80 
   6 -16  -2    2.50    3.50 
   6  16  -2    2.20    3.60 
  -6  16   2    3.20    3.30 
  -5 -16   2   33.00    8.90 
  -5 -16   2   33.00    3.90 
   5 -16  -2   34.90    8.50 
   5  16  -2   31.60    3.80 
   5  16  -2   31.40    4.10 
   5  16  -2   49.00    9.40 
  -5  16   2   44.70    8.50 
  -4 -16   2  210.38   19.20 
  -4 -16   2  216.68   11.90 
   4 -16  -2  232.68   18.00 
   4  16  -2  201.78   16.80 
  -4  16   2  216.58   16.40 
   4  16  -2  227.58   11.20 
   3 -16  -2  141.99   14.00 
  -3 -16   2  135.59    9.70 
   3  16  -2  130.09    9.20 
   3  16  -2  147.29   13.80 
  -3  16   2  144.79   13.20 
   2 -16  -2   33.60    7.40 
  -2 -16   2   20.10    4.80 
  -2  16   2   18.90    5.60 
   2  16  -2   28.60    5.10 
   2  16  -2   30.10    7.30 
   1 -16  -2  202.18   15.70 
  -1 -16   2  210.58   13.70 
   1  16  -2  181.28   12.40 
  -1  16   2  189.88   13.30 
  -1  16   2  178.18   15.20 
   1  16  -2  219.68   16.40 
   0 -16   2  389.06   24.30 
   0 -16  -2  412.76   22.80 
   0  16  -2  387.46   19.90 
   0  16   2  393.66   20.20 
   0  16  -2  394.76   23.00 
   0  16   2  416.86   23.90 
  -1 -16  -2  103.39   11.40 
   1 -16   2  105.69   10.10 
   1  16   2   99.59    9.40 
  -1  16  -2  108.79   11.10 
  -1  16  -2  108.79    9.90 
   1  16   2   80.59   10.50 
  -2 -16  -2   19.40    5.50 
   2 -16   2   21.00    5.40 
   2  16   2   23.90    6.50 
   2  16   2   25.40    5.20 
  -2  16  -2   23.10    5.70 
  -3 -16  -2  342.67   18.90 
   3 -16   2  341.47   20.60 
   3  16   2  315.37   17.40 
  -3  16  -2  326.07   20.60 
   3  16   2  354.16   22.80 
  -4 -16  -2   16.70    4.40 
  -4 -16  -2   15.60    6.40 
   4 -16   2   12.30    4.70 
   4  16   2    5.50    3.50 
   4  16   2   30.50    5.50 
   4  16   2    8.10    5.00 
  -4  16  -2   15.80    5.50 
   5 -16   2    5.00    4.00 
  -5 -16  -2   12.90    6.30 
   5  16   2   15.70    5.90 
  -5  16  -2   12.40    4.70 
   5  16   2   10.40    3.40 
   5  16   2    9.50    3.60 
   6 -16   2    9.40    4.60 
  -6 -16  -2   10.80    6.00 
   6  16   2   10.70    3.30 
   6  16   2    7.50    3.60 
   6  16   2    9.60    5.60 
  -6  16  -2   10.10    4.90 
  -7 -16  -2   12.40    4.60 
   7 -16   2    0.10    3.10 
   7  16   2    0.50    3.10 
   7  16   2   -2.30    2.30 
   7  16   2    5.40    4.30 
  -7  16  -2   -2.80    3.40 
  -8 -16  -2  122.29   16.00 
   8 -16   2  104.49   12.40 
   8  16   2  109.19   10.00 
  -8  16  -2  111.89   12.50 
   8  16   2  146.49   10.10 
   8  16   2  122.29   15.00 
  -9 -16  -2   92.19   16.80 
   9 -16   2   77.99   13.10 
  -9  16  -2   96.59   12.80 
   9  16   2  112.89   10.10 
   9  16   2   92.39    8.80 
 -10 -16  -2   30.80   10.90 
  10 -16   2   34.40    9.40 
 -10  16  -2   30.40    9.10 
  10  16   2   35.40    6.00 
  11 -16   2    9.80    7.10 
 -11 -16  -2   43.20   13.20 
 -11  16  -2   13.70    5.90 
  11  16   2    7.90    5.10 
 -12 -16  -2    2.40    7.20 
  12 -16   2    5.90    5.50 
 -12  16  -2   -8.00    5.10 
  13 -17  -2  -11.00    7.20 
 -13 -17   2    8.10    7.60 
 -13  17   2   -2.20    5.50 
 -12 -17   2    8.60    7.20 
  12 -17  -2   19.20    8.80 
 -12  17   2   -5.30    4.00 
  11 -17  -2    5.00    6.40 
 -11 -17   2   -2.00    6.10 
 -11  17   2    2.20    5.10 
  10 -17  -2   11.20    7.00 
 -10 -17   2   31.70    9.20 
 -10  17   2   17.30    5.60 
  -9 -17   2   67.69   14.50 
   9 -17  -2   89.09   14.60 
  -9  17   2   78.39   12.90 
   9  17  -2   67.09   13.10 
   8 -17  -2   68.79   12.10 
  -8 -17   2   83.79   15.10 
  -8  17   2   92.09   11.30 
   8  17  -2   81.49   13.90 
   7 -17  -2  136.49   15.80 
  -7 -17   2  146.39   17.20 
   7  17  -2  157.38   16.50 
  -7  17   2  155.78   14.40 
  -6 -17   2    2.20    4.10 
   6 -17  -2   10.30    5.50 
  -6  17   2   19.40    6.30 
   6  17  -2    8.50    1.40 
   6  17  -2    9.70    5.60 
   6  17  -2    9.60    1.80 
   5 -17  -2   18.40    6.30 
  -5 -17   2    9.90    5.40 
  -5 -17   2   16.20    3.10 
   5  17  -2   16.20    5.50 
  -5  17   2   17.50    6.00 
  -4 -17   2   47.90    5.50 
   4 -17  -2   46.70    9.40 
   4  17  -2   48.70    5.60 
  -4  17   2   58.99   10.20 
   4  17  -2   45.20    8.60 
  -3 -17   2   33.90    5.60 
   3 -17  -2   22.40    6.50 
  -3  17   2   27.70    7.30 
   3  17  -2   37.20    7.90 
   3  17  -2   29.80    5.10 
   2 -17  -2    0.40    3.10 
  -2 -17   2   -0.40    2.60 
  -2  17   2    0.00    2.10 
   2  17  -2    1.40    2.50 
   2  17  -2    1.10    2.80 
  -1 -17   2  150.98   12.00 
   1 -17  -2  146.99   13.90 
  -1  17   2  143.39   14.10 
   1  17  -2  154.88   11.70 
   1  17  -2  162.88   14.60 
   0 -17  -2   25.10    6.60 
   0 -17   2   24.40    5.90 
   0  17   2   30.90    5.70 
   0  17  -2   32.70    7.30 
   0  17  -2   26.30    5.80 
   0  17   2   16.20    5.80 
   1 -17   2   30.40    6.30 
  -1 -17  -2   37.20    7.10 
   1  17   2   29.90    5.70 
   1  17   2   35.60    7.90 
  -1  17  -2   31.50    7.20 
  -1  17  -2   27.50    6.70 
   2 -17   2  364.66   21.30 
  -2 -17  -2  365.56   21.20 
   2  17   2  406.26   24.40 
   2  17   2  346.17   18.80 
  -2  17  -2  349.96   21.90 
  -3 -17  -2  323.37   18.80 
   3 -17   2  301.97   19.80 
   3  17   2  330.97   22.50 
   3  17   2  293.37   20.10 
  -3  17  -2  298.17   20.20 
   4 -17   2   43.50    8.30 
  -4 -17  -2   57.19   12.10 
  -4 -17  -2   49.10    7.60 
   4  17   2   48.90   10.60 
   4  17   2   37.40    6.50 
  -4  17  -2   53.49    9.70 
   4  17   2   49.70    7.70 
   5 -17   2   20.50    6.40 
  -5 -17  -2   14.30    6.80 
   5  17   2   15.50    4.30 
  -5  17  -2   16.40    5.70 
   5  17   2   17.70    4.90 
   5  17   2   14.70    6.40 
   6 -17   2   89.19   12.20 
  -6 -17  -2  101.59   17.50 
   6  17   2  102.49    8.60 
  -6  17  -2   99.59   11.40 
   6  17   2  118.99    9.80 
   6  17   2  102.49    8.60 
   6  17   2   82.39   14.00 
  -7 -17  -2  155.68   17.60 
   7 -17   2  141.29   15.50 
   7  17   2  137.09   10.50 
   7  17   2  130.99    9.60 
  -7  17  -2  112.99   12.90 
   7  17   2  130.89   15.70 
  -8 -17  -2   10.30    5.90 
   8 -17   2    8.10    4.90 
   8  17   2    7.50    6.00 
   8  17   2   14.10    4.20 
  -8  17  -2   11.60    5.50 
   8  17   2   10.60    4.20 
  -9 -17  -2  207.58   22.50 
   9 -17   2  207.08   19.40 
   9  17   2  169.28   19.10 
   9  17   2  174.18   11.90 
  -9  17  -2  227.78   19.20 
  10 -17   2    4.20    5.60 
 -10 -17  -2    6.60    7.10 
 -10  17  -2   -2.60    5.70 
  10  17   2    6.80    3.90 
 -11 -17  -2   48.50   14.70 
  11 -17   2   47.40   11.20 
 -11  17  -2   47.00   10.90 
 -12 -18   2  105.29   20.20 
  12 -18  -2   79.59   15.50 
 -12  18   2   87.59   15.20 
  11 -18  -2  332.07   28.20 
 -11 -18   2  312.37   29.30 
 -11  18   2  364.16   26.30 
  10 -18  -2  102.89   16.60 
 -10 -18   2   94.99   16.80 
 -10  18   2   96.39   15.10 
  10  18  -2  107.79   17.30 
   9 -18  -2   26.30    8.70 
  -9 -18   2   28.50    9.60 
   9  18  -2   30.90    9.40 
  -9  18   2   32.50    7.80 
   8 -18  -2   19.40    7.30 
  -8 -18   2   40.10   10.20 
  -8  18   2   51.29    9.90 
   8  18  -2   33.50    9.30 
  -7 -18   2  213.28   22.20 
   7 -18  -2  252.67   21.80 
   7  18  -2  233.38   20.60 
  -7  18   2  246.38   19.20 
  -6 -18   2  379.76   28.30 
   6  18  -2  338.27   25.30 
  -6  18   2  344.07   23.00 
   6  18  -2  379.16   12.50 
   5 -18  -2   89.09   12.10 
  -5 -18   2   85.59    6.90 
  -5 -18   2  126.49   15.40 
   5  18  -2  108.19    7.30 
   5  18  -2   95.69   12.50 
  -5  18   2  105.29   12.20 
  -4 -18   2   54.99    6.30 
   4 -18  -2   53.89   10.40 
   4  18  -2   63.29    6.60 
   4  18  -2   56.19   10.70 
  -4  18   2   54.79   10.20 
   3 -18  -2   88.09   11.30 
  -3 -18   2   75.29    8.20 
   3  18  -2   95.29   11.50 
   3  18  -2   88.79    8.20 
  -3  18   2   85.89   10.80 
  -2 -18   2   79.59    8.50 
   2 -18  -2   68.19   11.40 
   2  18  -2   63.79    7.30 
   2  18  -2   54.09    9.90 
  -2  18   2   86.29   10.70 
   1 -18  -2 1436.46   55.39 
  -1 -18   2 1420.86   50.59 
   1  18  -2 1401.86   48.70 
   1  18  -2 1425.16   55.89 
  -1  18   2 1453.95   55.79 
   0 -18   2  597.84   28.80 
   0 -18  -2  623.24   31.30 
   0  18  -2  602.94   31.30 
   0  18  -2  614.74   27.70 
   0  18   2  627.74   32.10 
   1 -18   2   18.10    5.40 
  -1 -18  -2   23.00    5.70 
  -1  18  -2   11.60    4.90 
   1  18   2   20.10    6.40 
   1  18   2   19.00    4.80 
  -2 -18  -2    7.60    4.20 
   2 -18   2    9.60    3.90 
   2  18   2    4.50    2.80 
   2  18   2   13.70    4.90 
  -2  18  -2   12.90    4.70 
   3 -18   2  223.88   17.20 
  -3 -18  -2  228.28   15.80 
   3  18   2  213.18   14.00 
  -3  18  -2  231.28   17.90 
   3  18   2  226.78   18.60 
  -4 -18  -2  626.24   33.20 
  -4 -18  -2  645.14   37.90 
   4 -18   2  653.53   32.90 
   4  18   2  639.14   35.30 
  -4  18  -2  648.84   32.70 
   5 -18   2  685.03   38.10 
  -5 -18  -2  706.83   43.30 
   5  18   2  720.63   29.20 
  -5  18  -2  703.73   34.90 
   5  18   2  703.43   28.90 
   5  18   2  707.23   38.40 
   6 -18   2   45.60    9.10 
  -6 -18  -2   23.20    8.40 
   6  18   2   28.70    8.50 
  -6  18  -2   28.10    7.60 
   6  18   2   33.70    6.00 
  -7 -18  -2   45.00   11.90 
   7 -18   2   33.70    8.50 
   7  18   2   32.20    5.50 
  -7  18  -2   23.30    6.80 
   7  18   2   22.70    7.50 
   7  18   2   30.20    5.80 
  -8 -18  -2   14.80    8.50 
   8 -18   2   10.10    5.80 
   8  18   2   15.90    4.40 
   8  18   2   16.10    4.20 
   8  18   2   11.60    5.10 
  -8  18  -2   13.30    6.00 
   9 -18   2   59.49   11.60 
  -9 -18  -2   49.80   12.30 
  -9  18  -2   61.49   11.50 
   9  18   2   49.00   12.80 
   9  18   2   62.99    7.00 
 -10 -18  -2   37.40   11.70 
  10 -18   2   77.09   23.20 
 -10  18  -2   46.30   11.60 
  10  18   2   49.50   12.00 
  11 -18   2    2.20    4.90 
 -11 -18  -2    1.10    8.00 
  11  18   2   -2.00    5.90 
 -11  18  -2    9.60    5.20 
 -12 -19   2    0.10    7.40 
  12 -19  -2    2.90    6.20 
  12  19  -2    1.80    6.00 
 -12  19   2    8.40    6.10 
  11 -19  -2  212.98   22.70 
 -11 -19   2  258.17   26.50 
  11  19  -2  265.37   25.70 
 -11  19   2  259.67   22.20 
 -10 -19   2  190.58   21.80 
  10 -19  -2  170.88   19.00 
  10  19  -2  159.68   19.40 
 -10  19   2  167.18   17.00 
   9 -19  -2   11.30    6.60 
  -9 -19   2    3.00    4.80 
   9  19  -2    8.60    5.10 
  -9  19   2    1.20    4.30 
   8 -19  -2    0.00    4.20 
  -8 -19   2    3.70    4.70 
  -8  19   2    3.80    3.60 
   8  19  -2    4.30    4.10 
  -7 -19   2  800.12   45.60 
   7 -19  -2  699.93   40.20 
   7  19  -2  724.13   40.80 
  -7  19   2  714.03   36.50 
  -6 -19   2  996.20   52.09 
   6 -19  -2 1084.09   50.59 
   6  19  -2 1094.69   31.20 
  -6  19   2 1081.19   47.10 
   6  19  -2 1054.29   49.60 
  -5 -19   2  366.56   16.40 
   5 -19  -2  374.36   26.40 
  -5  19   2  424.06   25.50 
   5  19  -2  406.86   16.50 
   5  19  -2  339.27   25.00 
   4 -19  -2  390.96   26.50 
  -4 -19   2  370.46   18.40 
   4  19  -2  402.26   17.70 
   4  19  -2  366.56   25.90 
  -4  19   2  371.26   24.30 
   3 -19  -2    5.90    3.90 
  -3 -19   2   14.40    4.00 
   3  19  -2   21.80    6.70 
  -3  19   2    5.40    4.80 
   3  19  -2   15.30    3.90 
   2 -19  -2  108.89   12.50 
  -2 -19   2  101.49   10.40 
   2  19  -2  114.49   12.90 
  -2  19   2  112.09   12.70 
  -1 -19   2  251.67   16.90 
   1 -19  -2  255.47   19.90 
  -1  19   2  258.17   20.10 
   1  19  -2  251.07   19.60 
   1  19  -2  236.58   15.40 
   0 -19   2    4.30    3.70 
   0 -19  -2   12.20    5.10 
   0  19  -2    3.70    3.10 
   0  19   2   12.30    5.30 
   1 -19   2   19.90    5.30 
  -1 -19  -2   26.60    6.70 
  -1  19  -2   21.00    6.40 
   1  19   2   22.80    7.10 
  -2 -19  -2    5.20    3.80 
   2 -19   2   -1.80    2.30 
  -2  19  -2    0.90    3.10 
   2  19   2    0.30    2.50 
   2  19   2    6.50    4.10 
   3 -19   2    7.00    3.90 
  -3 -19  -2    5.90    3.40 
   3  19   2    8.70    3.30 
   3  19   2   -3.90    3.30 
  -3  19  -2    0.00    3.00 
  -4 -19  -2  248.78   16.40 
   4 -19   2  266.57   20.10 
   4  19   2  240.08   21.10 
  -4  19  -2  249.78   19.90 
   4  19   2  265.97   15.70 
   4  19   2  266.47   17.00 
   5 -19   2  475.25   28.50 
  -5 -19  -2  401.96   30.90 
  -5  19  -2  471.75   27.60 
   5  19   2  452.65   29.80 
   5  19   2  443.06   25.50 
   5  19   2  440.66   25.50 
   6 -19   2   90.89   12.30 
  -6 -19  -2   84.49   16.00 
  -6  19  -2   94.19   11.70 
   6  19   2   91.49    8.80 
   6  19   2   89.49    8.70 
   6  19   2   92.39   15.20 
  -7 -19  -2   -8.30    4.50 
   7 -19   2    8.20    5.10 
  -7  19  -2   16.10    6.00 
   7  19   2    1.90    2.90 
   7  19   2   -7.20    2.80 
   7  19   2    8.70    5.50 
  -8 -19  -2  130.09   21.60 
   8 -19   2  147.79   16.90 
   8  19   2  145.09   10.40 
   8  19   2  149.79   18.40 
  -8  19  -2  149.19   15.90 
   9 -19   2  626.04   38.10 
  -9 -19  -2  652.43   44.60 
  -9  19  -2  651.53   36.60 
   9  19   2  646.54   25.40 
 -10 -19  -2  515.85   39.40 
  10 -19   2  514.45   35.10 
 -10  19  -2  493.75   32.50 
  10  19   2  539.25   37.40 
  11 -20  -2  423.86   33.30 
 -11 -20   2  409.56   34.40 
  11  20  -2  415.26   33.20 
 -11  20   2  408.76   29.50 
 -10 -20   2  371.16   38.90 
  10 -20  -2  369.66   36.70 
 -10  20   2  401.26   33.80 
  10  20  -2  357.66   32.20 
  -9 -20   2   55.59   14.80 
   9 -20  -2   64.79   13.70 
   9  20  -2   67.89   13.60 
  -9  20   2   69.39   11.90 
   8 -20  -2   96.19   16.20 
  -8 -20   2  127.59   20.40 
  -8  20   2  112.59   13.70 
   8  20  -2  106.59   17.40 
  -7 -20   2   84.19   16.10 
   7 -20  -2   50.99   11.40 
  -7  20   2   83.59   11.00 
   7  20  -2   62.79   12.90 
   6 -20  -2    1.30    4.00 
  -6 -20   2   -5.10    4.50 
   6  20  -2    9.00    4.90 
  -6  20   2   -1.00    4.10 
   6  20  -2    2.60    1.60 
   6  20  -2    4.50    2.20 
   5 -20  -2   10.40    5.70 
  -5 -20   2   19.80    4.20 
   5  20  -2   28.30    4.80 
  -5  20   2   26.90    7.40 
   5  20  -2   29.90    8.20 
  -4 -20   2    8.70    3.10 
   4 -20  -2   -4.50    3.60 
  -4  20   2    6.30    4.80 
   4  20  -2    6.30    3.20 
   4  20  -2    4.10    4.60 
   3 -20  -2  104.09   13.10 
  -3 -20   2  121.49   10.60 
   3  20  -2  102.89   13.30 
   3  20  -2  108.39    9.50 
  -3  20   2   90.09   13.80 
   2 -20  -2 1282.27   54.19 
  -2 -20   2 1316.07   48.10 
  -2  20   2 1359.46   75.19 
   2  20  -2 1292.37   45.70 
   2  20  -2 1264.37   75.19 
   1 -20  -2 1005.00   44.50 
  -1 -20   2  978.80   39.80 
  -1  20   2  915.11   43.40 
   1  20  -2  936.81   44.10 
   1  20  -2  954.90   37.60 
   0 -20   2 1077.19   44.70 
   0 -20  -2 1156.48   48.10 
   0  20   2 1142.09   49.30 
   0  20  -2 1102.59   49.20 
   1 -20   2  624.14   31.30 
  -1 -20  -2  630.14   31.70 
   1  20   2  557.94   40.00 
  -1  20  -2  531.55   46.00 
  -2 -20  -2  271.57   19.10 
   2 -20   2  280.77   19.90 
  -2  20  -2  275.27   20.70 
   2  20   2  236.78   21.50 
  -3 -20  -2  938.31   39.80 
   3 -20   2  969.50   43.50 
   3  20   2  961.40   46.20 
   3  20   2  974.50   37.10 
  -3  20  -2  958.70   43.60 
   4 -20   2  879.71   50.99 
  -4 -20  -2  914.21   37.90 
   4  20   2  959.90   38.60 
   4  20   2  929.81   36.00 
   4  20   2  981.30   47.30 
  -4  20  -2  962.10   43.70 
   5 -20   2  279.97   22.10 
   5  20   2  315.07   25.00 
  -5  20  -2  295.87   21.90 
   5  20   2  290.87   17.30 
   5  20   2  300.27   17.10 
  -6 -20  -2  179.88   20.10 
   6 -20   2  188.58   18.10 
   6  20   2  154.08   14.20 
  -6  20  -2  190.18   17.20 
   6  20   2  165.38   18.40 
  -7 -20  -2   36.40   10.30 
   7 -20   2   26.00    8.10 
   7  20   2   22.00    6.40 
   7  20   2   37.10    9.80 
  -7  20  -2   36.40    8.60 
   7  20   2   29.10    5.40 
   8 -20   2   16.90    6.70 
  -8 -20  -2   23.40   10.40 
   8  20   2    5.90    6.30 
  -8  20  -2    8.70    5.10 
   8  20   2   20.40    4.30 
   9 -20   2  244.98   29.40 
  -9 -20  -2  221.58   27.60 
   9  20   2  289.27   31.50 
  -9  20  -2  294.27   37.20 
 -10 -20  -2  219.28   26.10 
  10 -20   2  230.58   23.70 
  10  20   2  220.88   23.10 
 -10  20  -2  253.27   22.20 
  11 -21  -2  157.78   21.00 
 -11 -21   2  133.79   23.00 
  11  21  -2  164.68   21.50 
 -11  21   2  142.29   17.30 
 -10 -21   2  427.86   36.10 
  10 -21  -2  442.66   34.80 
  10  21  -2  425.46   33.70 
 -10  21   2  430.06   30.30 
   9 -21  -2   20.10    8.30 
  -9 -21   2   10.70    8.20 
  -9  21   2   16.50    6.70 
   9  21  -2   23.40    8.00 
   8 -21  -2  130.19   17.20 
  -8 -21   2   98.89   18.90 
  -8  21   2  114.79   14.20 
   8  21  -2   88.69   15.20 
  -7 -21   2  962.20   53.49 
   7 -21  -2  910.21   48.90 
   7  21  -2  950.60   49.20 
  -7  21   2  989.70   46.00 
   6 -21  -2 1181.48   56.29 
   6  21  -2 1210.18   56.29 
  -6  21   2 1289.97   53.59 
   6  21  -2 1174.68   35.70 
  -5 -21   2  693.43   26.40 
   5 -21  -2  665.63   39.40 
  -5  21   2  700.13   36.80 
   5  21  -2  719.03   25.90 
   5  21  -2  639.64   37.90 
   4 -21  -2  351.56   26.20 
  -4 -21   2  323.27   17.90 
  -4  21   2  321.97   23.60 
   4  21  -2  336.17   24.90 
   4  21  -2  327.07   16.90 
   3 -21  -2  540.55   32.20 
  -3 -21   2  521.05   28.80 
   3  21  -2  527.95   31.70 
  -3  21   2  495.35   30.30 
  -2 -21   2  162.28   13.80 
   2 -21  -2  181.28   18.10 
  -2  21   2  198.78   17.70 
   2  21  -2  187.28   17.80 
   2  21  -2  175.48   13.30 
   1 -21  -2  193.78   17.50 
  -1 -21   2  214.18   16.90 
  -1  21   2  215.08   19.10 
   1  21  -2  212.58   18.40 
   0 -21  -2    5.80    5.10 
   0 -21   2   11.10    4.90 
   0  21   2    2.80    3.80 
   0  21  -2   10.00    4.80 
   1 -21   2   48.90    9.30 
  -1 -21  -2   42.40    8.80 
  -1  21  -2   34.80    8.80 
   1  21   2   37.00    8.90 
  -2 -21  -2   22.10    6.30 
   2 -21   2    9.70    4.70 
   2  21   2   14.50    7.10 
  -2  21  -2   20.90    6.70 
   3 -21   2  241.88   19.50 
  -3 -21  -2  198.28   16.60 
  -3  21  -2  264.77   20.60 
   3  21   2  245.58   21.40 
   4 -21   2  946.11   44.60 
  -4 -21  -2  950.70   38.80 
   4  21   2  900.11   38.20 
   4  21   2  923.41   46.90 
   4  21   2  911.11   35.90 
  -4  21  -2  938.01   43.90 
   5 -21   2  668.93   36.90 
   5  21   2  657.53   27.60 
   5  21   2  588.74   36.80 
   5  21   2  651.33   28.80 
  -5  21  -2  619.14   34.40 
   6 -21   2  283.47   23.90 
  -6 -21  -2  289.57   27.10 
   6  21   2  313.37   17.30 
  -6  21  -2  304.17   23.10 
   6  21   2  294.57   25.40 
   6  21   2  301.77   16.70 
   7 -21   2  131.49   16.10 
  -7 -21  -2  105.49   19.00 
  -7  21  -2  128.59   14.80 
   7  21   2  119.19   15.40 
   7  21   2  106.29   17.90 
  -8 -21  -2  200.88   23.50 
   8 -21   2  208.68   21.50 
   8  21   2  192.78   12.30 
   8  21   2  186.18   20.70 
  -8  21  -2  205.68   19.80 
  -9 -21  -2  646.74   46.30 
   9 -21   2  732.63   43.40 
  -9  21  -2  656.13   38.80 
   9  21   2  710.63   45.20 
 -10 -22   2  377.26   35.00 
  10 -22  -2  396.56   33.20 
  10  22  -2  388.16   31.70 
 -10  22   2  370.76   28.30 
  -9 -22   2  260.87   27.00 
   9 -22  -2  202.48   23.50 
   9  22  -2  234.88   24.10 
  -9  22   2  260.57   22.40 
  -8 -22   2   12.00    6.10 
   8 -22  -2   -3.50    4.40 
   8  22  -2    8.30    6.70 
  -8  22   2    4.00    4.80 
  -7 -22   2    5.00    6.60 
   7  22  -2    5.40    6.30 
  -7  22   2    0.60    4.40 
   6 -22  -2   29.50    8.40 
   6  22  -2   24.30    3.40 
   6  22  -2   12.90    8.40 
  -6  22   2   27.00    7.30 
   5 -22  -2    9.20    5.10 
  -5 -22   2   11.20    3.70 
  -5  22   2   -0.40    3.60 
   5  22  -2   -3.70    4.30 
   5  22  -2   14.50    4.30 
  -4 -22   2   -4.60    2.60 
   4 -22  -2    7.10    4.90 
  -4  22   2    1.60    4.50 
   4  22  -2   12.40    5.50 
   4  22  -2    3.30    3.60 
   3 -22  -2  278.07   23.70 
  -3 -22   2  320.57   19.00 
   3  22  -2  261.27   16.80 
  -3  22   2  302.07   22.90 
   3  22  -2  297.57   23.40 
   2 -22  -2  391.06   27.00 
  -2 -22   2  404.96   22.90 
   2  22  -2  378.46   26.00 
   2  22  -2  332.07   25.50 
  -2  22   2  350.16   25.20 
   1 -22  -2  672.73   36.90 
  -1 -22   2  753.62   34.60 
  -1  22   2  659.73   36.80 
   1  22  -2  718.43   38.30 
   0 -22   2  587.24   30.40 
   0 -22  -2  608.04   33.20 
   0  22   2  536.55   33.50 
   0  22  -2  573.94   33.40 
  -1 -22  -2  612.54   32.60 
   1 -22   2  545.85   30.90 
   1  22   2  550.24   33.40 
  -1  22  -2  619.64   34.00 
   2 -22   2  544.95   31.30 
  -2 -22  -2  570.64   30.20 
  -2  22  -2  537.75   32.10 
   2  22   2  557.44   33.90 
   3 -22   2   40.00    9.20 
  -3 -22  -2   37.10    8.10 
  -3  22  -2   48.80   10.70 
   3  22   2   45.80   11.00 
   4 -22   2   54.19   10.40 
  -4 -22  -2   51.79    8.90 
   4  22   2   61.49   13.30 
   4  22   2   39.40    8.00 
  -4  22  -2   48.00   10.40 
   5 -22   2  300.07   24.40 
   5  22   2  284.07   24.90 
  -5  22  -2  291.57   23.00 
   5  22   2  317.77   17.70 
   5  22   2  322.97   19.00 
   6 -22   2  252.57   22.40 
   6  22   2  234.28   14.90 
  -6  22  -2  245.28   20.70 
   6  22   2  227.28   22.60 
  -7 -22  -2   12.50    8.10 
   7 -22   2   11.40    6.20 
  -7  22  -2   12.00    7.20 
   7  22   2    4.50    5.30 
  -8 -22  -2   38.60   12.90 
   8 -22   2   14.10    7.80 
  -8  22  -2   35.70    9.60 
   8  22   2    8.00    7.90 
  -9 -22  -2   84.09   18.50 
   9 -22   2  111.19   18.20 
  -9  22  -2   94.89   16.70 
   9  22   2  133.99   17.70 
  -9 -23   2   55.69   15.20 
   9 -23  -2   70.39   14.40 
  -9  23   2   68.89   13.20 
   9  23  -2   50.29   12.50 
   8 -23  -2   34.60   12.20 
  -8 -23   2   24.80   10.90 
   8  23  -2   20.90   10.40 
  -8  23   2   27.50    9.00 
   7 -23  -2   10.10    7.20 
  -7  23   2   17.80    6.80 
   7  23  -2   32.20    9.50 
   6 -23  -2   11.00    6.40 
   6  23  -2   -2.20    6.50 
   6  23  -2    6.30    2.40 
  -6  23   2    4.00    5.60 
   5 -23  -2   52.89   10.90 
  -5 -23   2   31.60    5.50 
   5  23  -2   54.89   12.30 
  -5  23   2   26.20    8.40 
   5  23  -2   42.10    9.60 
  -4 -23   2  268.47   16.90 
   4 -23  -2  249.68   22.50 
   4  23  -2  279.27   24.00 
   4  23  -2  296.77   19.50 
  -4  23   2  278.07   22.40 
   3 -23  -2   45.20   10.50 
  -3 -23   2   34.50    7.90 
   3  23  -2   64.39   12.10 
   3  23  -2   47.60    7.80 
  -3  23   2   30.60    8.40 
  -2 -23   2    7.00    4.60 
   2 -23  -2    0.50    5.30 
   2  23  -2    0.70    3.90 
  -2  23   2    3.20    4.40 
   1 -23  -2   10.60    5.50 
  -1 -23   2    2.80    3.80 
   1  23  -2    5.60    4.40 
   0 -23   2   42.20    8.90 
   0 -23  -2   47.40   10.00 
   0  23   2   30.90    9.50 
   0  23  -2   34.40    8.70 
   1 -23   2    4.20    4.40 
  -1 -23  -2   -5.00    4.10 
   1  23   2    2.10    4.70 
   2 -23   2   34.10   11.10 
  -2 -23  -2   37.60    8.20 
  -2  23  -2   35.80    9.70 
   2  23   2   30.80    9.00 
  -3 -23  -2   71.09   11.30 
   3 -23   2   78.69   13.10 
   3  23   2  102.69   13.60 
  -3  23  -2   79.69   13.40 
   4 -23   2   52.79   11.20 
  -4 -23  -2   60.99    9.90 
   4  23   2   38.80    8.30 
  -4  23  -2   56.29   12.30 
   4  23   2   62.19   13.30 
   5 -23   2   42.60   11.00 
   5  23   2   34.20   10.10 
  -5  23  -2   32.90    8.40 
   5  23   2   38.70    7.40 
   6 -23   2   87.19   15.50 
   6  23   2   97.49    9.50 
  -6  23  -2  117.39   14.20 
   6  23   2   89.89   16.70 
   7 -23   2   55.99   18.10 
   7  23   2   39.50   12.20 
   7  23   2   42.70    7.50 
  -7  23  -2   26.80    8.60 
  -8 -23  -2  124.29   21.90 
   8 -23   2  150.68   18.40 
  -8  23  -2  154.78   17.30 
   8  23   2  118.59   18.90 
   8 -24  -2   -7.80    4.80 
  -8  24   2    7.40    5.00 
   8  24  -2    0.60    5.70 
   7 -24  -2  -12.00    5.10 
  -7  24   2    5.40    5.20 
   7  24  -2    7.80    6.90 
   6 -24  -2   13.00    6.40 
  -6  24   2   19.90    7.70 
   6  24  -2   19.30    7.90 
   5 -24  -2  102.19   17.70 
  -5 -24   2   80.89    8.50 
   5  24  -2   97.79    8.80 
   5  24  -2  102.59   17.30 
  -5  24   2  105.39   13.70 
  -4 -24   2   13.50    6.30 
   4  24  -2    8.60    4.70 
  -4  24   2    3.60    5.00 
   3 -24  -2  105.19   16.90 
  -3 -24   2  130.19   12.50 
  -3  24   2  101.39   15.90 
   3  24  -2  140.19   16.10 
   2 -24  -2   72.29   12.90 
  -2 -24   2   85.39   11.00 
   2  24  -2   72.19   14.00 
  -2  24   2  104.59   13.70 
   1 -24  -2   28.30    8.60 
  -1 -24   2   47.70    9.00 
  -1  24   2   27.60    8.80 
   1  24  -2   49.70   11.00 
   0 -24   2   29.00    8.40 
   0 -24  -2   35.70    9.40 
   0  24  -2   32.00    8.60 
   0  24   2   38.90    9.70 
  -1 -24  -2  145.49   15.20 
   1 -24   2  140.69   14.60 
   1  24   2  129.89   15.60 
  -1  24  -2  136.29   16.20 
   2 -24   2   27.40    7.80 
  -2 -24  -2   24.60    6.80 
  -2  24  -2   28.20    8.20 
   2  24   2   47.30   10.80 
   3 -24   2  137.79   16.00 
  -3 -24  -2  129.09   13.50 
  -3  24  -2  115.59   15.20 
   3  24   2  126.99   16.50 
  -4 -24  -2   56.49    9.20 
   4 -24   2   45.80   11.60 
   4  24   2   49.50    9.10 
  -4  24  -2   56.09   11.40 
   4  24   2   76.99   14.90 
   5 -24   2   50.99   11.90 
  -5  24  -2   47.60   11.00 
   5  24   2   48.70   11.30 
   5  24   2   47.20    7.80 
   6 -24   2    6.50    7.50 
   6  24   2   17.80    4.70 
  -6  24  -2    5.40    5.40 
   6  24   2    9.30    7.40 
   7 -24   2   14.70    8.40 
   7  24   2    2.90    6.70 
  -7  24  -2    9.90    5.90 
   7 -25  -2  124.49   16.50 
  -7  25   2   71.69   13.80 
   7  25  -2   89.89   16.00 
   6 -25  -2  397.26   32.50 
   6  25  -2  450.25   33.30 
  -6  25   2  488.05   32.20 
  -5 -25   2  197.68   13.40 
   5 -25  -2  204.28   22.30 
   5  25  -2  227.08   24.40 
  -5  25   2  200.88   24.90 
   5  25  -2  208.58   13.50 
   4 -25  -2   -4.70    5.20 
  -4 -25   2   -3.90    4.00 
   4  25  -2    1.50    5.30 
  -4  25   2   -0.90    5.40 
   3 -25  -2   16.20    7.80 
  -3 -25   2    3.80    4.80 
   3  25  -2   14.90    6.90 
  -3  25   2   -8.90    3.60 
   2 -25  -2  142.79   17.80 
  -2 -25   2  170.68   15.30 
   2  25  -2  188.98   19.00 
  -2  25   2  164.28   19.20 
  -1 -25   2   26.70    7.70 
   1 -25  -2   18.60    6.50 
   1  25  -2   17.30    8.10 
  -1  25   2   22.70    9.20 
   0 -25   2   -4.40    3.30 
   0 -25  -2   -2.70    4.70 
   0  25  -2   -8.10    4.20 
   0  25   2   -5.10    5.20 
   1 -25   2   16.40    6.60 
  -1 -25  -2   33.00    8.50 
   1  25   2   11.80    7.40 
  -2 -25  -2   -1.70    6.50 
   2 -25   2   -4.50    4.40 
  -2  25  -2   14.30    6.20 
   2  25   2    2.10    5.20 
   3 -25   2  112.79   14.60 
  -3 -25  -2  113.39   13.30 
   3  25   2   95.89   12.20 
  -3  25  -2  119.79   15.30 
   3  25   2  127.19   16.80 
   4 -25   2  394.96   29.60 
  -4 -25  -2  399.16   24.20 
   4  25   2  389.86   24.00 
   4  25   2  423.76   33.40 
  -4  25  -2  389.86   35.20 
   5 -25   2  209.68   22.30 
  -5  25  -2  231.28   22.00 
   5  25   2  266.77   25.20 
   5  25   2  253.77   17.10 
   6 -25   2   61.89   13.40 
   6  25   2   64.09   13.60 
  -6  25  -2   50.89   11.80 
   6 -26  -2   40.10   13.10 
   6  26  -2   61.59   14.20 
  -6  26   2   34.70   10.50 
   5 -26  -2    2.50    5.30 
  -5 -26   2    8.40    5.90 
   5  26  -2    7.90    5.50 
  -5  26   2    5.70    6.90 
  -4 -26   2    7.50    5.00 
   4 -26  -2    3.30    5.90 
  -4  26   2   10.50    6.60 
   4  26  -2   -5.10    4.50 
   3 -26  -2  -11.10    4.10 
  -3 -26   2   -4.60    4.90 
   2 -26  -2   24.90    9.10 
  -2 -26   2   47.60    9.20 
  -2  26   2   31.60    9.10 
   2  26  -2   44.00   10.80 
  -1 -26   2  746.73   38.40 
   1 -26  -2  784.62   43.40 
  -1  26   2  808.32   44.00 
   1  26  -2  761.42   43.50 
   0 -26   2  701.93   39.80 
   0 -26  -2  767.32   41.30 
   0  26  -2  720.53   41.70 
   0  26   2  759.72   43.20 
   1 -26   2  122.09   15.40 
  -1 -26  -2  150.08   18.10 
   1  26   2  131.89   17.60 
  -1  26  -2  108.89   17.50 
   2 -26   2   18.60    6.70 
  -2 -26  -2   15.90    7.10 
   3 -26   2   19.00    8.30 
  -3 -26  -2   24.80    7.00 
   3  26   2   15.90    8.50 
   3  26   2   21.80    6.40 
  -3  26  -2   24.90    8.70 
  -4 -26  -2  127.09   14.60 
   4 -26   2  130.39   17.00 
  -4  26  -2  102.39   17.00 
   4  26   2  143.09   17.90 
   4  26   2  128.89   13.60 
   5 -26   2  166.28   35.80 
   5  26   2  196.38   22.10 
  -5  26  -2  148.59   18.30 
   5  26   2  152.38   13.40 
   5 -27  -2  458.15   39.20 
   5  27  -2  609.04   40.00 
  -5  27   2  603.04   37.80 
  -4 -27   2  182.58   14.90 
   4 -27  -2  123.09   19.50 
   4  27  -2  170.08   19.70 
  -4  27   2  169.38   19.60 
   3 -27  -2  129.89   17.60 
  -3 -27   2  112.99   13.90 
  -3  27   2  120.09   18.30 
   3  27  -2   95.79   16.10 
   2 -27  -2  147.69   19.10 
  -2 -27   2  123.79   14.00 
  -2  27   2  132.69   19.60 
   2  27  -2  143.59   17.50 
   1 -27  -2  104.49   16.70 
  -1 -27   2  118.19   16.00 
  -1  27   2   99.19   16.80 
   1  27  -2   85.89   15.50 
   0 -27  -2  192.58   20.50 
   0 -27   2  150.88   16.70 
   0  27  -2  153.98   18.50 
   0  27   2  162.78   20.10 
   1 -27   2   90.89   14.70 
  -1 -27  -2  124.19   14.80 
  -1  27  -2  100.99   16.90 
   1  27   2   82.89   15.70 
   2 -27   2   18.40    8.00 
  -2 -27  -2    6.20    6.40 
   2  27   2    5.00    6.40 
  -2  27  -2    9.20    7.30 
   3 -27   2   19.40    7.90 
  -3 -27  -2   17.30    7.50 
   3  27   2   34.50   10.90 
  -3  27  -2   12.70    7.80 
   2 -28  -2  253.17   25.80 
  -2 -28   2  283.07   21.70 
  -2  28   2  281.77   25.20 
   2  28  -2  257.17   24.10 
   1 -28  -2  316.67   27.20 
  -1 -28   2  258.17   22.80 
   1  28  -2  347.97   27.70 
  -1  28   2  280.97   26.10 
   0 -28   2  310.27   24.70 
   0 -28  -2  309.37   25.90 
   0  28  -2  286.57   26.40 
   0  28   2  368.86   29.50 
  -1 -28  -2  275.57   23.90 
   1 -28   2  292.97   25.10 
  -1  28  -2  376.96   29.60 
   1  28   2  268.47   26.30 
 -16   0   3   -1.90    5.80 
  16   0  -3    3.00    5.30 
 -15   0   3   -4.90    3.90 
 -14   0   3    0.70    4.20 
  14   0  -3    5.20    3.20 
  13   0  -3    3.30    2.90 
 -13   0   3    4.90    4.60 
  12   0  -3   -4.50    2.50 
 -12   0   3    1.40    3.70 
 -11   0   3   -0.20    3.20 
 -11   0   3    0.80    3.40 
  11   0  -3    6.70    3.80 
 -10   0   3   -0.70    2.50 
 -10   0   3    2.80    3.10 
  10   0  -3    0.60    2.10 
  -9   0   3    4.70    2.80 
   9   0  -3    1.00    1.80 
  -9   0   3   -1.30    2.10 
   8   0  -3    0.70    1.80 
  -8   0   3   -3.00    1.60 
  -8   0   3    2.60    2.10 
   8   0  -3    0.50    1.60 
  -7   0   3    1.50    1.80 
  -7   0   3    1.50    1.60 
   7   0  -3   -0.50    1.40 
   7   0  -3    0.20    1.50 
   6   0  -3   -0.30    1.30 
   6   0  -3    2.70    1.90 
  -6   0   3    1.40    2.00 
  -6   0   3    3.90    1.60 
   5   0  -3   -0.30    1.00 
  -5   0   3   -0.10    0.70 
   5   0  -3    6.90    2.10 
  -5   0   3    1.20    1.40 
   4   0  -3   -0.70    0.70 
  -4   0   3    1.00    1.00 
   4   0  -3    1.10    0.90 
  -4   0   3    1.20    0.90 
   3   0  -3    1.00    0.80 
  -3   0   3    1.80    1.00 
   3   0  -3    0.40    0.90 
  -3   0   3    2.30    1.30 
   2   0  -3    0.80    0.50 
   2   0  -3    1.30    0.80 
  -2   0   3    0.30    0.50 
  -2   0   3    0.40    0.70 
   1   0  -3    1.50    0.90 
  -1   0   3    0.10    0.60 
   1   0  -3    1.10    0.80 
  -1   0   3    0.30    0.70 
   0   0   3    1.40    1.10 
   0   0  -3    3.70    1.60 
   0   0   3    4.80    0.60 
  -1   0  -3    1.30    0.70 
   1   0   3    1.80    0.80 
   1   0   3    1.10    1.10 
  -1   0  -3    1.90    1.10 
   2   0   3    1.30    1.30 
  -2   0  -3    5.40    1.90 
   2   0   3    3.00    1.00 
   3   0   3   -0.20    1.60 
   3   0   3   -0.70    0.90 
  -3   0  -3   -0.30    1.10 
  -3   0  -3   -0.50    1.20 
  -4   0  -3   -1.00    1.50 
   4   0   3   -3.10    1.80 
   4   0   3   -1.50    1.10 
  -4   0  -3   -0.10    1.40 
  -5   0  -3    0.70    2.00 
   5   0   3    1.60    1.60 
  -5   0  -3    5.30    2.30 
   5   0   3    2.20    3.20 
  -6   0  -3    1.60    2.10 
   6   0   3    1.60    2.10 
  -6   0  -3    3.60    2.70 
   6   0   3    0.80    3.50 
   7   0   3    5.20    3.00 
   7   0   3    3.80    3.80 
  -7   0  -3    0.30    2.60 
   8   0   3    0.40    3.40 
  -8   0  -3    0.30    2.40 
   9   0   3    2.10    3.70 
  -9   0  -3   -1.50    2.60 
  10   0   3   -3.90    2.40 
 -10   0  -3    0.40    3.20 
  11   0   3    3.70    4.30 
 -11   0  -3    9.30    4.70 
 -12   0  -3   -3.70    3.90 
  12   0   3   -2.80    3.10 
 -13   0  -3    4.40    6.10 
  13   0   3    6.90    4.50 
  14   0   3   -1.80    5.30 
 -14   0  -3    4.90    7.20 
  16  -1  -3  393.46   26.80 
 -16  -1   3  377.36   31.20 
  16   1  -3  395.26   25.50 
 -16   1   3  390.36   31.10 
  15  -1  -3  158.58   16.60 
 -15  -1   3  164.18   18.00 
 -15   1   3  210.48   20.50 
  15   1  -3  176.48   16.00 
  14  -1  -3    9.70    4.30 
 -14  -1   3   14.80    6.70 
 -14   1   3   18.50    7.20 
  14   1  -3    7.80    4.00 
 -13  -1   3  167.98   17.00 
  13  -1  -3  122.19   12.60 
 -13   1   3  140.29   15.10 
  13   1  -3  135.89   12.60 
 -12  -1   3  306.67   28.80 
 -12  -1   3  372.46   20.20 
  12  -1  -3  404.76   22.80 
 -12   1   3  389.76   31.30 
  12   1  -3  388.76   21.50 
  11  -1  -3  616.94   29.10 
 -11  -1   3  689.53   33.80 
 -11  -1   3  622.04   27.30 
  11   1  -3  621.64   29.40 
 -11   1   3  665.13   32.60 
 -11   1   3  633.24   28.40 
 -10  -1   3  116.69   11.90 
 -10  -1   3   99.89    9.10 
  10  -1  -3  106.59   10.10 
 -10   1   3  111.29   11.30 
 -10   1   3  103.99    9.60 
  10   1  -3   85.99    8.60 
  -9  -1   3  157.48   12.90 
   9  -1  -3  160.68   11.60 
  -9  -1   3  149.09   10.60 
  -9   1   3  135.79   10.60 
  -9   1   3  153.28   12.50 
   9   1  -3  150.28   10.60 
  -8  -1   3   27.10    4.50 
   8  -1  -3   23.50    5.10 
   8  -1  -3   46.20    5.80 
  -8  -1   3   40.00    6.90 
  -8   1   3   27.30    5.60 
   8   1  -3   38.20    4.90 
  -8   1   3   30.80    5.00 
   8   1  -3   44.40    5.70 
   7  -1  -3  392.76   18.10 
   7  -1  -3  371.96   18.10 
  -7  -1   3  393.06   19.20 
  -7  -1   3  382.46   15.50 
  -7   1   3  373.46   18.70 
  -7   1   3  391.76   16.70 
   7   1  -3  374.56   18.10 
   7   1  -3  400.16   16.90 
   6  -1  -3  346.37   15.70 
  -6  -1   3  326.67   13.10 
  -6  -1   3  341.27   16.50 
   6  -1  -3  316.67   15.20 
   6   1  -3  314.87   15.30 
  -6   1   3  324.27   14.30 
   6   1  -3  332.47   14.40 
  -6   1   3  342.37   16.10 
   5  -1  -3 1105.39   35.90 
  -5  -1   3 1126.19   33.70 
   5  -1  -3 1185.88   36.90 
  -5  -1   3 1130.89   36.90 
  -5   1   3 1103.69   35.10 
   5   1  -3 1133.99   36.30 
   5   1  -3 1166.78   35.20 
  -5   1   3 1157.38   36.50 
   4  -1  -3  162.98    9.10 
  -4  -1   3  162.48    7.80 
  -4  -1   3  173.88    8.90 
   4  -1  -3  152.18    8.10 
  -4   1   3  152.58    8.20 
  -4   1   3  164.98    8.60 
   4   1  -3  158.08    8.40 
   4   1  -3  157.18    8.10 
   3  -1  -3 4624.74  121.69 
   3  -1  -3 4445.46  118.69 
  -3  -1   3 4531.85  119.59 
  -3  -1   3 4611.04  119.49 
  -3   1   3 4336.97  120.99 
   3   1  -3 4478.95  118.99 
  -3   1   3 4557.04  118.89 
   3   1  -3 4567.34  119.79 
   2  -1  -3 2606.44   71.79 
  -2  -1   3 2518.35   69.69 
  -2  -1   3 2588.44   70.29 
  -2  -1   3 2647.14   68.49 
   2  -1  -3 2510.75   67.59 
   2   1  -3 2607.04   70.19 
   2   1  -3 2548.15   67.89 
  -2   1   3 2533.55   71.39 
  -2   1   3 2560.54   67.69 
  -1  -1   3  342.07   13.30 
  -1  -1   3  342.47   12.80 
   1  -1  -3  341.97   13.90 
   1  -1  -3  351.86   10.00 
  -1  -1   3  367.66   10.60 
  -1   1   3  357.26   13.90 
   1   1  -3  343.67   10.20 
   1   1  -3  299.07    9.90 
  -1   1   3  349.27   14.10 
   1   1  -3  341.67   13.00 
  -1   1   3  348.87    9.80 
   0  -1  -3 4619.74  115.89 
   0   1  -3 4348.96  120.49 
   0   1   3 4509.45  119.99 
   1  -1   3  300.57   12.70 
  -1  -1  -3  293.27   12.70 
   1  -1   3  292.77   10.00 
  -1  -1  -3  282.17   10.50 
  -1   1  -3  281.27   12.40 
   1   1   3  288.67   10.00 
   1   1   3  286.07   12.30 
  -1   1  -3  270.57   10.20 
  -2  -1  -3    4.60    1.80 
   2  -1   3    5.50    2.40 
   2  -1   3    7.20    1.60 
  -2  -1  -3    9.90    2.00 
  -2   1  -3    8.40    1.80 
   2   1   3    4.90    1.30 
   2   1   3    3.70    1.70 
  -2   1  -3    1.80    1.50 
  -3  -1  -3  689.03   23.80 
   3  -1   3  694.53   25.50 
   3  -1   3  693.63   23.00 
  -3  -1  -3  664.53   24.50 
   3   1   3  676.23   24.70 
  -3   1  -3  647.44   22.90 
  -3   1  -3  650.83   24.70 
   3   1   3  651.43   22.70 
  -4  -1  -3  874.41   30.70 
   4  -1   3  862.31   29.60 
  -4  -1  -3  840.62   30.70 
   4  -1   3  961.20   32.90 
   4   1   3  843.02   29.40 
  -4   1  -3  871.01   31.50 
   4   1   3  906.11   31.80 
  -4   1  -3  871.11   30.20 
   5  -1   3   61.79    6.30 
  -5  -1  -3   57.89    6.20 
  -5  -1  -3   54.59    6.30 
   5  -1   3   66.09    7.50 
   5   1   3   57.79    7.10 
  -5   1  -3   67.79    6.80 
   5   1   3   58.29    6.10 
  -5   1  -3   67.79    7.10 
  -6  -1  -3   61.09    7.00 
   6  -1   3   51.19    8.50 
   6  -1   3   61.69    8.00 
  -6  -1  -3   60.99    7.10 
  -6   1  -3   69.29    7.40 
   6   1   3   76.29    8.90 
   6   1   3   63.09    8.00 
  -6   1  -3   62.59    7.30 
   7  -1   3   33.90    6.10 
  -7  -1  -3   14.60    4.10 
   7  -1   3   23.20    6.10 
  -7  -1  -3   28.90    6.00 
   7   1   3   19.30    5.40 
  -7   1  -3   29.30    6.10 
  -7   1  -3   20.60    4.90 
   7   1   3   28.00    5.10 
  -8  -1  -3   14.10    5.20 
   8  -1   3   22.10    6.00 
  -8   1  -3   16.70    5.00 
   8   1   3   14.00    5.70 
   9  -1   3   -0.20    3.50 
  -9  -1  -3   -5.40    2.20 
   9   1   3    3.00    4.20 
  -9   1  -3   -2.10    2.70 
  10  -1   3    1.40    3.60 
 -10  -1  -3   -6.10    2.60 
 -10   1  -3   10.40    5.20 
  10   1   3    2.40    3.80 
  11  -1   3   56.99    9.50 
 -11  -1  -3   61.09   11.40 
  11   1   3   61.69   10.40 
 -11   1  -3   80.09   10.50 
 -12  -1  -3    0.50    3.50 
  12  -1   3    1.60    3.90 
 -12   1  -3    3.40    5.20 
  12   1   3    5.20    4.90 
  13  -1   3  127.99   13.10 
 -13  -1  -3   95.89   16.40 
  13   1   3  107.29   12.10 
 -13   1  -3  113.39   17.50 
 -14  -1  -3  384.56   38.40 
  14  -1   3  483.55   29.60 
  14   1   3  493.65   29.20 
 -14   1  -3  493.35   36.80 
 -16  -2   3  204.08   21.60 
  16  -2  -3  201.88   18.70 
  16   2  -3  177.48   16.20 
 -16   2   3  204.48   22.20 
 -15  -2   3   48.60   12.20 
  15  -2  -3   56.39   11.30 
  15   2  -3   55.09    8.80 
 -15   2   3   36.80   10.50 
  14  -2  -3   32.50    6.90 
 -14  -2   3   34.10    8.40 
  14   2  -3   21.20    6.40 
 -14   2   3   27.00    8.80 
  13  -2  -3   13.50    5.30 
 -13  -2   3   11.80    5.40 
  13   2  -3   15.10    5.30 
 -13   2   3   21.40    6.50 
 -12  -2   3   21.80    7.40 
 -12  -2   3   26.30    5.70 
  12  -2  -3   35.70    7.10 
  12   2  -3   34.30    6.60 
 -12   2   3   30.60    8.30 
 -11  -2   3   75.59   12.30 
 -11  -2   3   72.59    8.20 
  11  -2  -3   79.09    9.80 
 -11   2   3  106.69   11.80 
  11   2  -3   73.69    8.20 
 -10  -2   3  428.16   24.70 
 -10  -2   3  438.36   19.90 
  10  -2  -3  429.46   22.20 
 -10   2   3  405.96   21.10 
 -10   2   3  467.55   24.60 
  10   2  -3  391.96   19.50 
  -9  -2   3   91.49    7.80 
  -9  -2   3   89.09   10.00 
   9  -2  -3   94.29    9.00 
   9   2  -3   93.89    7.80 
  -9   2   3   98.89   10.00 
  -9   2   3   90.09   10.40 
   8  -2  -3    9.60    3.20 
  -8  -2   3   11.90    4.00 
  -8  -2   3    9.80    3.10 
   8  -2  -3    5.50    2.70 
  -8   2   3   13.20    4.10 
   8   2  -3    7.40    3.20 
  -8   2   3   14.80    3.70 
   8   2  -3    9.80    2.90 
   7  -2  -3 3399.96   99.69 
  -7  -2   3 3479.15   94.99 
  -7  -2   3 3471.35  101.89 
   7  -2  -3 3666.93  100.69 
  -7   2   3 3490.75   97.79 
   7   2  -3 3479.75  100.19 
  -7   2   3 3512.75  100.69 
   7   2  -3 3475.45   96.29 
   6  -2  -3 6062.69  166.58 
   6  -2  -3 6279.57  167.68 
  -6  -2   3 6324.67  168.78 
  -6   2   3 6197.48  167.28 
   6   2  -3 6290.57  163.68 
  -6   2   3 6111.09  165.28 
   6   2  -3 6135.19  166.98 
   5  -2  -3 1415.16   44.80 
  -5  -2   3 1461.05   45.10 
  -5  -2   3 1408.96   40.10 
   5  -2  -3 1377.86   43.30 
   5   2  -3 1385.86   43.80 
   5   2  -3 1444.16   41.60 
  -5   2   3 1440.26   43.30 
  -5   2   3 1438.66   43.90 
   4  -2  -3   73.79    6.10 
   4  -2  -3   65.79    5.10 
  -4  -2   3   71.69    5.70 
  -4  -2   3   71.49    4.40 
  -4   2   3   76.79    5.80 
  -4   2   3   71.79    5.30 
   4   2  -3   75.29    4.80 
   4   2  -3   75.49    5.50 
  -3  -2   3   27.10    2.80 
   3  -2  -3   31.00    3.80 
   3  -2  -3   30.40    2.90 
  -3  -2   3   26.90    3.00 
   3   2  -3   29.90    3.00 
  -3   2   3   31.20    3.70 
  -3   2   3   31.50    3.00 
   3   2  -3   29.60    3.60 
   2  -2  -3  499.95   15.70 
  -2  -2   3  518.85   17.00 
  -2  -2   3  488.75   16.30 
   2  -2  -3  496.45   19.00 
   2   2  -3  496.35   16.20 
   2   2  -3  497.65   16.70 
  -1  -2   3 4790.62  121.79 
   1  -2  -3 4646.44  120.79 
   1  -2  -3 4582.94  125.49 
   1   2  -3 4575.24  120.89 
   1   2  -3 4763.42  121.59 
   1   2  -3 4694.43  123.29 
   0  -2   3   59.39    4.70 
   0  -2   3   56.79    3.20 
   0  -2  -3   66.39    5.40 
   0  -2  -3   60.29    5.00 
   0  -2  -3   58.89    3.70 
   0   2   3   57.19    3.30 
   0   2   3   56.69    3.40 
   0   2  -3   56.49    3.10 
   0   2   3   47.80    4.40 
   0   2   3   64.49    5.40 
  -1  -2  -3 1251.47   38.80 
  -1  -2  -3 1229.68   36.50 
   1  -2   3 1277.57   38.80 
   1  -2   3 1296.67   35.60 
  -1   2  -3 1226.08   35.40 
   1   2   3 1284.67   35.80 
  -1   2  -3 1269.97   38.50 
   1   2   3 1266.67   39.50 
  -2  -2  -3    7.00    2.10 
   2  -2   3    5.10    2.40 
  -2  -2  -3    7.20    2.20 
   2  -2   3    9.10    1.90 
   2   2   3    8.80    2.20 
  -2   2  -3    7.80    1.80 
   2   2   3    9.30    2.00 
  -2   2  -3   11.20    2.70 
  -3  -2  -3  518.75   19.70 
   3  -2   3  479.35   18.20 
   3  -2   3  495.95   20.90 
  -3   2  -3  492.75   20.40 
  -3   2  -3  497.15   18.60 
   3   2   3  517.55   20.00 
   3   2   3  502.25   18.60 
   4  -2   3 7461.75  198.28 
   4  -2   3 8013.70  203.08 
  -4  -2  -3 7590.54  200.28 
  -4  -2  -3 7275.77  199.58 
   4   2   3 7340.37  198.28 
   4   2   3 7698.53  200.38 
  -4   2  -3 7158.58  200.68 
  -4   2  -3 7438.76  198.68 
   5  -2   3 3042.10   90.29 
   5  -2   3 3070.29   87.49 
  -5  -2  -3 2995.90   88.19 
  -5  -2  -3 3110.89   89.69 
  -5   2  -3 3088.19   88.19 
  -5   2  -3 2974.40   89.49 
   5   2   3 3023.70   87.39 
   5   2   3 3133.89   89.19 
   6  -2   3    3.10    3.50 
  -6  -2  -3    0.70    2.10 
  -6  -2  -3    2.00    2.40 
  -6   2  -3    5.50    3.30 
  -6   2  -3    0.20    2.30 
   6   2   3    5.80    3.00 
   6   2   3   -0.10    2.90 
  -7  -2  -3   92.09    9.90 
  -7  -2  -3  112.69    9.50 
   7  -2   3   88.79    8.60 
   7  -2   3  100.59   10.50 
   7   2   3  101.59   10.60 
  -7   2  -3   97.79    9.70 
   7   2   3   95.39    8.80 
  -7   2  -3  100.79    9.60 
   8  -2   3  682.23   31.30 
  -8  -2  -3  641.74   29.20 
  -8  -2  -3  726.63   33.10 
  -8   2  -3  697.93   31.40 
   8   2   3  724.03   31.10 
   9  -2   3 1502.05   54.79 
  -9  -2  -3 1491.55   57.19 
  -9   2  -3 1509.55   55.89 
   9   2   3 1513.65   53.99 
  10  -2   3  381.76   23.10 
 -10  -2  -3  425.06   25.70 
  10   2   3  361.06   21.90 
 -10   2  -3  406.36   24.60 
 -11  -2  -3  114.79   13.20 
  11  -2   3   73.89   12.10 
 -11   2  -3   97.29   14.70 
  11   2   3   92.79   11.20 
 -12  -2  -3   81.09   14.30 
  12  -2   3   67.39   11.60 
  12   2   3   82.89   10.80 
 -12   2  -3   72.79   12.70 
  13  -2   3    7.00    5.10 
 -13  -2  -3   10.50    7.30 
  13   2   3   -4.90    4.00 
 -13   2  -3   -0.50    5.20 
 -14  -2  -3   -2.40    7.40 
  14  -2   3    1.30    5.90 
  14   2   3    6.70    6.10 
 -14   2  -3   16.70    9.80 
  16  -3  -3  454.95   31.10 
 -16  -3   3  466.65   35.10 
  16   3  -3  484.05   27.70 
  15  -3  -3  251.27   21.10 
 -15  -3   3  285.37   25.80 
 -15   3   3  280.87   24.50 
  15   3  -3  260.47   18.80 
 -14  -3   3   75.39   14.30 
  14  -3  -3   70.79   11.60 
  14   3  -3   81.29   10.00 
 -14   3   3   73.19   13.30 
 -13  -3   3  344.07   25.80 
  13  -3  -3  361.26   23.40 
 -13  -3   3  352.86   19.20 
  13   3  -3  333.77   19.70 
 -13   3   3  369.56   25.20 
 -12  -3   3 1111.09   50.19 
  12  -3  -3 1190.38   47.30 
  12   3  -3  996.90   56.49 
 -12   3   3 1221.98   49.70 
 -11  -3   3 1759.02   63.79 
  11  -3  -3 1684.03   59.19 
 -11  -3   3 1623.84   52.59 
 -11   3   3 1797.72   62.19 
  11   3  -3 1416.06   52.29 
 -10  -3   3  432.96   19.20 
  10  -3  -3  477.75   24.10 
 -10  -3   3  426.76   25.00 
 -10   3   3  434.66   22.20 
 -10   3   3  467.95   24.90 
  10   3  -3  380.76   18.80 
  -9  -3   3  160.78   10.10 
   9  -3  -3  143.99   11.80 
  -9  -3   3  164.88   13.90 
  -9   3   3  157.98   12.60 
   9   3  -3  163.68   10.20 
  -9   3   3  160.58   11.60 
   8  -3  -3  483.35   22.70 
  -8  -3   3  508.05   24.90 
   8  -3  -3  496.65   23.20 
  -8  -3   3  466.55   18.60 
   8   3  -3  511.25   19.60 
  -8   3   3  520.75   23.80 
   8   3  -3  500.15   23.10 
  -8   3   3  493.85   21.40 
   7  -3  -3   40.80    6.40 
   7  -3  -3   52.69    6.10 
  -7  -3   3   49.30    4.50 
  -7  -3   3   51.19    7.90 
   7   3  -3   54.79    4.80 
   7   3  -3   41.80    6.50 
  -7   3   3   48.10    5.40 
  -7   3   3   52.39    6.20 
   6  -3  -3   21.80    4.50 
   6  -3  -3   22.00    4.30 
  -6  -3   3   24.50    2.80 
  -6  -3   3   17.00    4.20 
   6   3  -3   18.10    4.00 
  -6   3   3   20.10    4.30 
   6   3  -3   23.40    2.90 
  -6   3   3   17.20    3.60 
  -5  -3   3  660.33   25.40 
   5  -3  -3  660.83   25.40 
  -5  -3   3  659.03   19.80 
   5  -3  -3  654.43   23.90 
  -5   3   3  659.13   24.00 
   5   3  -3  645.94   24.10 
  -5   3   3  662.13   24.10 
   5   3  -3  658.43   21.10 
  -4  -3   3  247.58   12.50 
   4  -3  -3  266.37   11.70 
   4  -3  -3  246.48   13.00 
  -4  -3   3  255.17    9.30 
  -4   3   3  258.47   11.60 
  -4   3   3  249.18   12.20 
   4   3  -3  256.17   12.00 
   4   3  -3  268.27    9.90 
  -3  -3   3   85.79    6.10 
  -3  -3   3   84.79    4.70 
  -3  -3   3   92.49    4.60 
   3  -3  -3   78.19    6.60 
  -3   3   3   85.99    5.40 
   3   3  -3   88.69    4.60 
  -3   3   3   90.69    6.60 
   2  -3  -3 2360.36   63.49 
  -2  -3   3 2354.86   63.59 
  -2  -3   3 2283.87   63.39 
   2  -3  -3 2363.26   67.59 
  -2  -3   3 2353.26   65.09 
   2   3  -3 2330.57   63.29 
   2   3  -3 2400.46   64.59 
  -2   3   3 2306.77   66.99 
  -2   3   3 2340.87   63.19 
   1  -3  -3 1883.71   50.59 
  -1  -3   3 1845.42   51.49 
   1  -3  -3 1866.11   54.99 
  -1   3   3 1820.52   54.49 
   1   3  -3 1925.21   51.79 
  -1   3   3 1743.13   50.89 
   1   3  -3 1909.21   51.69 
   0  -3   3  389.16   15.00 
   0  -3  -3  391.96   16.10 
   0  -3  -3  327.97   15.70 
   0  -3   3  382.56   13.20 
   0   3   3  442.96   16.80 
   0   3   3  400.66   13.90 
   0   3   3  374.56   16.00 
   0   3  -3  374.86   15.20 
  -1  -3  -3 2166.68   62.89 
  -1  -3  -3 2154.78   61.09 
   1  -3   3 2185.48   62.59 
   1  -3   3 2226.88   59.79 
   1   3   3 2247.08   62.59 
   1   3   3 2214.58   60.39 
  -1   3  -3 2152.88   62.19 
   1   3   3 2140.79   63.39 
  -1   3  -3 2133.09   59.29 
   2  -3   3  153.98    8.00 
   2  -3   3  151.28    9.60 
  -2  -3  -3  168.98    9.50 
  -2  -3  -3  152.98    8.80 
   2   3   3  166.28    9.10 
  -2   3  -3  165.38    9.70 
   2   3   3  147.69    8.00 
   2   3   3  162.68    9.90 
  -2   3  -3  147.79    7.70 
  -3  -3  -3  316.17   15.20 
   3  -3   3  354.46   16.90 
  -3  -3  -3  324.27   15.40 
   3  -3   3  367.26   14.80 
   3   3   3  364.76   15.60 
  -3   3  -3  343.97   16.40 
  -3   3  -3  355.96   14.70 
   3   3   3  358.56   14.90 
   4  -3   3 2100.99   63.69 
   4  -3   3 2037.70   60.49 
  -4  -3  -3 2060.69   62.79 
   4   3   3 1997.10   60.49 
   4   3   3 2149.88   61.89 
  -4   3  -3 1969.20   62.79 
  -4   3  -3 2052.09   60.79 
  -5  -3  -3  480.65   21.00 
  -5  -3  -3  523.85   23.00 
   5  -3   3  474.55   20.50 
   5  -3   3  493.45   23.00 
  -5   3  -3  505.05   21.30 
  -5   3  -3  467.05   23.50 
   5   3   3  469.45   20.60 
   5   3   3  496.65   21.60 
  -6  -3  -3  102.09   13.70 
  -6  -3  -3  107.59    9.20 
   6  -3   3  103.99    8.70 
   6  -3   3  118.39   10.70 
  -6   3  -3  107.99   10.30 
   6   3   3  104.39    8.80 
   6   3   3  119.79   10.20 
  -7  -3  -3  136.59   11.00 
  -7  -3  -3  162.88   13.30 
   7  -3   3  155.98   11.60 
   7  -3   3  179.78   13.70 
   7   3   3  161.28   12.70 
   7   3   3  161.88   11.90 
  -7   3  -3  159.98   12.30 
  -8  -3  -3   95.49   10.50 
   8  -3   3   93.09   10.40 
  -8  -3  -3   72.79    8.40 
  -8   3  -3   84.29    9.60 
   8   3   3   89.99   10.60 
  -9  -3  -3  469.35   27.20 
   9  -3   3  455.65   25.20 
  -9   3  -3  453.55   25.40 
   9   3   3  464.05   24.70 
 -10  -3  -3  396.56   25.70 
  10  -3   3  352.66   22.40 
  10   3   3  405.06   23.30 
 -10   3  -3  431.46   25.30 
  11  -3   3   86.49   11.60 
 -11  -3  -3   76.49   13.20 
  11   3   3   73.19   11.00 
 -11   3  -3   89.49   11.00 
  12  -3   3   12.20    5.80 
 -12  -3  -3   37.80    9.60 
  12   3   3   14.20    5.40 
 -12   3  -3   19.00    6.70 
  13  -3   3  316.17   22.60 
 -13  -3  -3  331.87   26.90 
 -13   3  -3  347.47   26.60 
  13   3   3  308.37   21.50 
 -14  -3  -3  948.71   53.29 
  14  -3   3 1028.60   48.00 
  14   3   3  970.30   44.10 
 -14   3  -3 1030.60   51.89 
  16  -4  -3  623.44   37.70 
 -16  -4   3  670.03   43.00 
  16   4  -3  607.54   30.90 
 -16   4   3  629.24   39.60 
  15  -4  -3  180.18   18.40 
 -15  -4   3  209.68   21.10 
  15   4  -3  186.98   15.00 
 -15   4   3  205.18   19.60 
  14  -4  -3  130.99   14.80 
 -14  -4   3  125.09   10.80 
 -14  -4   3   88.29   15.10 
  14   4  -3  126.89   11.70 
 -14   4   3  153.58   16.40 
 -13  -4   3  170.78   12.40 
  13  -4  -3  174.08   16.40 
 -13  -4   3  168.68   18.10 
  13   4  -3  179.48   13.40 
 -13   4   3  167.18   16.90 
 -12  -4   3    1.50    4.70 
 -12  -4   3    3.30    3.40 
  12  -4  -3    3.70    3.50 
  12   4  -3   -5.60    2.40 
 -12   4   3    2.30    4.20 
 -11  -4   3  627.04   24.70 
 -11  -4   3  669.53   34.40 
  11  -4  -3  636.14   30.90 
  11   4  -3  524.75   24.20 
 -11   4   3  639.34   31.70 
  10  -4  -3  415.76   23.00 
 -10  -4   3  401.56   17.70 
 -10  -4   3  437.06   25.60 
  10   4  -3  362.46   17.60 
 -10   4   3  455.05   24.40 
  -9  -4   3   29.30    6.90 
  -9  -4   3   24.40    4.00 
   9  -4  -3   27.50    5.90 
  -9   4   3   27.60    6.20 
  -9   4   3   19.20    4.80 
   9   4  -3   15.10    3.40 
  -8  -4   3  487.05   18.00 
   8  -4  -3  488.15   27.90 
  -8  -4   3  504.55   25.40 
   8  -4  -3  461.05   22.40 
   8   4  -3  512.75   23.70 
  -8   4   3  504.75   23.60 
   8   4  -3  507.45   18.60 
  -8   4   3  428.96   24.90 
   7  -4  -3 1673.63   70.59 
  -7  -4   3 1739.03   49.50 
  -7  -4   3 1791.52   65.79 
   7  -4  -3 1879.21   58.19 
   7   4  -3 1684.23   62.19 
  -7   4   3 1698.93   61.79 
  -7   4   3 1733.73   54.69 
   7   4  -3 1872.51   50.69 
   6  -4  -3 5239.78  145.69 
   6  -4  -3 5529.95  148.29 
  -6  -4   3 5355.76  148.79 
  -6  -4   3 5247.67  138.79 
   6   4  -3 5424.26  139.99 
   6   4  -3 5221.28  146.09 
  -6   4   3 5279.87  145.09 
  -6   4   3 5464.75  146.39 
   5  -4  -3 1398.96   45.30 
   5  -4  -3 1324.37   42.80 
  -5  -4   3 1387.16   45.30 
  -5  -4   3 1338.47   37.00 
   5   4  -3 1412.06   38.20 
  -5   4   3 1347.97   43.20 
   5   4  -3 1354.96   43.60 
  -5   4   3 1408.86   43.30 
   4  -4  -3  171.38    9.50 
  -4  -4   3  187.68    6.70 
  -4  -4   3  183.78    6.70 
  -4  -4   3  181.98   10.70 
   4  -4  -3  200.78   11.60 
  -4   4   3  170.08   10.10 
   4   4  -3  186.78    6.90 
  -4   4   3  185.68    9.70 
   4   4  -3  171.88   10.00 
  -3  -4   3 7952.60  205.58 
   3  -4  -3 8130.69  212.28 
   3   4  -3 7993.90  209.78 
  -3   4   3 7886.91  210.98 
  -2  -4   3 1877.51   58.69 
  -2  -4   3 2204.18   61.69 
   2  -4  -3 2181.38   63.49 
   2  -4  -3 2185.28   59.79 
   2   4  -3 2178.78   61.09 
  -2   4   3 2121.89   62.69 
  -2   4   3 2272.17   59.59 
   2   4  -3 2196.58   58.29 
  -1  -4   3 2943.31   77.89 
   1  -4  -3 2841.72   81.29 
   1  -4  -3 2836.42   77.39 
  -1  -4   3 2839.22   77.69 
   1   4  -3 2838.62   77.59 
   1   4  -3 2899.31   78.99 
  -1   4   3 2928.51   77.39 
  -1   4   3 2835.52   81.09 
   1   4  -3 2861.31   77.39 
   0  -4   3  199.78    9.00 
   0  -4  -3  208.58    9.90 
   0  -4  -3  203.38   10.90 
   0  -4   3  206.48   10.20 
   0   4  -3  206.18    9.90 
   0   4   3  206.98    9.10 
   0   4   3  206.38    9.80 
   0   4  -3  206.68    8.90 
   0   4   3  210.38   11.20 
   0   4   3  205.78   10.90 
   1  -4   3 2298.37   62.69 
  -1  -4  -3 2292.87   65.39 
   1  -4   3 2315.37   65.09 
  -1  -4  -3 2280.57   64.39 
   1   4   3 2230.18   63.39 
  -1   4  -3 2145.59   64.29 
  -1   4  -3 2195.38   61.99 
   1   4   3 2236.58   64.79 
   1   4   3 2296.47   65.99 
  -2  -4  -3  365.36   16.40 
   2  -4   3  380.26   15.20 
  -2  -4  -3  413.66   17.10 
   2  -4   3  379.26   17.20 
   2   4   3  381.76   15.70 
   2   4   3  378.76   17.10 
  -2   4  -3  393.96   15.10 
   2   4   3  409.46   16.50 
  -2   4  -3  405.76   17.60 
  -3  -4  -3  597.24   23.90 
   3  -4   3  617.54   22.40 
  -3  -4  -3  628.34   23.60 
   3  -4   3  626.34   24.90 
   3   4   3  589.04   22.50 
  -3   4  -3  577.94   24.10 
  -3   4  -3  616.54   22.20 
   3   4   3  650.93   23.10 
   3   4   3  617.94   24.20 
  -4  -4  -3  329.57   17.00 
   4  -4   3  359.76   17.90 
  -4  -4  -3  326.07   16.00 
   4  -4   3  337.97   15.70 
   4   4   3  345.17   15.80 
  -4   4  -3  344.57   15.70 
  -4   4  -3  311.77   17.00 
   4   4   3  357.86   16.10 
   5  -4   3  771.12   38.30 
  -5  -4  -3  924.41   34.50 
   5  -4   3  815.02   30.80 
   5   4   3  907.91   32.00 
  -5   4  -3  842.72   33.50 
   5   4   3  858.71   31.50 
  -5   4  -3  886.91   31.80 
   6  -4   3 1030.90   37.30 
   6  -4   3 1032.60   39.50 
  -6  -4  -3 1089.49   40.80 
  -6   4  -3 1056.39   38.00 
   6   4   3 1010.30   37.20 
   6   4   3 1056.89   37.70 
  -6   4  -3  973.90   39.00 
  -7  -4  -3  287.77   16.00 
   7  -4   3  304.37   18.50 
   7  -4   3  229.08   16.10 
  -7  -4  -3  272.87   18.20 
   7   4   3  262.57   16.10 
  -7   4  -3  259.07   16.20 
   7   4   3  276.87   20.70 
   8  -4   3  484.95   25.60 
  -8  -4  -3  503.25   27.60 
  -8  -4  -3  504.75   24.10 
   8   4   3  500.95   25.00 
  -8   4  -3  532.85   26.20 
   9  -4   3 1179.08   47.60 
  -9  -4  -3 1281.07   52.09 
   9   4   3 1252.07   46.60 
  -9   4  -3 1249.18   48.80 
  10  -4   3 1352.26   52.89 
 -10  -4  -3 1397.06   57.59 
  10   4   3 1344.97   50.99 
 -10   4  -3 1427.26   54.79 
 -11  -4  -3  481.45   31.00 
  11  -4   3  497.25   28.10 
 -11   4  -3  489.85   29.00 
  11   4   3  506.15   26.70 
 -12  -4  -3   63.89   12.90 
  12  -4   3   53.39   10.60 
 -12   4  -3   60.19   11.00 
  12   4   3   47.50    8.60 
  13  -4   3  131.59   14.20 
 -13  -4  -3   79.59   16.00 
  13   4   3  110.09   12.60 
 -13   4  -3   98.89   15.80 
 -14  -4  -3   19.30    9.20 
  14  -4   3   10.70    7.50 
  14   4   3    9.20    6.00 
 -14   4  -3   14.10    8.60 
 -16  -5   3  135.59   17.80 
  16  -5  -3   86.59   15.30 
 -16   5   3  113.49   18.40 
 -15  -5   3  101.29   17.20 
  15  -5  -3  106.29   14.30 
 -15   5   3   96.89   16.30 
  15   5  -3  113.49   11.70 
 -14  -5   3   47.10    7.20 
 -14  -5   3   55.29   12.30 
  14  -5  -3   59.49   11.30 
  14   5  -3   51.69    7.80 
 -14   5   3   57.19   11.30 
 -13  -5   3  266.97   14.90 
  13  -5  -3  258.97   20.80 
 -13  -5   3  235.48   21.80 
  13   5  -3  259.67   15.60 
 -13   5   3  255.67   20.50 
 -12  -5   3 1380.56   58.79 
  12  -5  -3 1401.96   55.19 
 -12  -5   3 1387.16   44.30 
 -12   5   3 1439.96   56.19 
  12   5  -3 1241.08   45.10 
  11  -5  -3  833.72   38.30 
 -11  -5   3  910.31   42.30 
 -11  -5   3  895.91   30.20 
 -11   5   3  903.71   39.40 
  11   5  -3  763.42   30.30 
 -10  -5   3  765.42   26.10 
 -10  -5   3  779.52   36.90 
  10  -5  -3  794.72   34.90 
  10   5  -3  667.93   26.20 
 -10   5   3  748.43   34.10 
   9  -5  -3  276.97   17.70 
  -9  -5   3  251.97   11.80 
  -9  -5   3  275.57   19.30 
  -9   5   3  276.47   17.40 
   9   5  -3  278.27   12.60 
  -9   5   3  268.57   16.10 
  -8  -5   3   40.70    4.10 
   8  -5  -3   45.50    7.60 
  -8  -5   3   50.59    8.50 
   8  -5  -3   47.80    7.40 
  -8   5   3   50.59    6.70 
   8   5  -3   58.39    4.50 
  -8   5   3   39.00    6.30 
   8   5  -3   47.90    7.40 
  -7  -5   3 1522.05   43.10 
   7  -5  -3 1603.04   53.19 
  -7  -5   3 1573.84   54.19 
   7  -5  -3 1558.24   51.09 
   7   5  -3 1591.14   44.00 
   7   5  -3 1512.75   51.19 
  -7   5   3 1514.95   49.80 
  -7   5   3 1555.04   51.29 
  -6  -5   3  965.90   36.70 
   6  -5  -3  984.90   36.20 
  -6  -5   3  948.11   26.80 
   6  -5  -3  929.81   33.90 
   6   5  -3  929.01   34.40 
  -6   5   3  975.40   34.20 
  -6   5   3  969.20   33.80 
   6   5  -3  996.80   27.60 
   5  -5  -3    1.00    1.50 
  -5  -5   3    6.50    2.80 
   5  -5  -3    1.20    1.20 
  -5  -5   3    2.70    0.70 
  -5  -5   3    1.60    0.50 
  -5   5   3    1.20    1.40 
  -5   5   3    1.20    1.50 
   5   5  -3    1.10    1.30 
   5   5  -3    1.90    0.60 
  -4  -5   3  753.72   28.10 
   4  -5  -3  752.02   28.30 
   4  -5  -3  706.03   25.50 
  -4  -5   3  734.23   20.10 
  -4  -5   3  713.23   19.90 
   4   5  -3  746.73   26.90 
  -4   5   3  743.53   25.60 
  -4   5   3  728.93   26.80 
  -3  -5   3   13.50    1.60 
   3  -5  -3   11.60    2.50 
  -3  -5   3   10.70    1.60 
  -3  -5   3    9.20    2.60 
   3  -5  -3   10.30    3.00 
   3   5  -3    9.00    1.40 
  -3   5   3   14.00    2.70 
   3   5  -3   12.00    2.90 
  -3   5   3   11.70    2.70 
  -2  -5   3  535.25   17.90 
  -2  -5   3  586.34   21.80 
   2  -5  -3  558.54   19.80 
   2  -5  -3  578.04   22.80 
   2   5  -3  546.65   20.20 
   2   5  -3  586.44   21.50 
  -2   5   3  555.94   21.90 
   2   5  -3  577.84   17.90 
  -2   5   3  571.64   19.60 
   0  -5   3 4766.22  129.89 
   0  -5  -3 4894.51  132.39 
   0   5   3 4762.42  132.09 
   0   5  -3 4866.81  129.69 
   0   5  -3 4885.31  128.79 
   0   5   3 4930.01  130.79 
  -1  -5  -3 1484.55   45.70 
   1  -5   3 1484.25   45.40 
  -1  -5  -3 1435.96   45.80 
   1  -5   3 1476.65   43.80 
   1   5   3 1522.55   44.50 
   1   5   3 1482.75   45.00 
   1   5   3 1492.45   45.60 
   1   5   3 1455.85   46.30 
  -1   5  -3 1455.75   43.10 
  -1   5  -3 1450.65   45.20 
   2  -5   3  461.15   18.10 
  -2  -5  -3  466.75   19.40 
   2  -5   3  486.15   20.00 
  -2  -5  -3  468.65   19.90 
   2   5   3  473.85   20.00 
   2   5   3  470.05   18.80 
   2   5   3  472.55   18.80 
  -2   5  -3  440.76   17.40 
  -2   5  -3  477.05   20.30 
  -3  -5  -3 2605.14   76.99 
   3  -5   3 2564.44   76.69 
  -3  -5  -3 2520.15   75.09 
   3  -5   3 2588.94   74.19 
   3   5   3 2640.04   76.49 
   3   5   3 2700.13   74.59 
  -3   5  -3 2512.55   76.69 
  -3   5  -3 2641.74   73.99 
   3   5   3 2596.14   74.99 
  -4  -5  -3 4079.69  117.09 
   4  -5   3 4376.66  119.89 
   4  -5   3 4182.98  116.69 
  -4  -5  -3 4262.27  120.19 
  -4   5  -3 4282.57  116.69 
   4   5   3 4347.96  116.59 
   4   5   3 4205.08  117.29 
   4   5   3 4191.38  118.29 
  -4   5  -3 4031.70  119.39 
  -5  -5  -3 1508.55   51.09 
   5  -5   3 1492.55   50.29 
  -5  -5  -3 1454.25   47.80 
   5  -5   3 1427.36   47.60 
   5   5   3 1537.05   47.60 
  -5   5  -3 1494.15   48.10 
  -5   5  -3 1420.26   50.19 
   5   5   3 1402.66   47.60 
   6  -5   3  648.04   28.40 
   6  -5   3  597.84   25.90 
  -6  -5  -3  602.84   25.60 
  -6  -5  -3  638.24   29.20 
  -6   5  -3  591.64   28.10 
   6   5   3  645.34   26.20 
   6   5   3  601.54   26.10 
  -6   5  -3  614.84   26.40 
  -7  -5  -3   26.70    6.50 
   7  -5   3   25.40    6.30 
  -7  -5  -3   19.20    5.90 
   7   5   3   25.60    7.40 
  -7   5  -3   23.10    5.20 
  -8  -5  -3   34.50    6.20 
   8  -5   3   46.00    8.30 
  -8  -5  -3   49.30    9.40 
   8   5   3   44.00    7.60 
  -8   5  -3   42.70    7.90 
   9  -5   3  401.66   23.80 
  -9  -5  -3  437.16   26.70 
  -9   5  -3  410.16   23.90 
   9   5   3  438.66   23.30 
 -10  -5  -3  405.26   27.40 
  10  -5   3  425.36   25.70 
 -10   5  -3  499.35   27.40 
  10   5   3  453.05   24.30 
  11  -5   3    3.10    3.90 
 -11  -5  -3    0.80    3.80 
  11   5   3    5.80    4.50 
 -11   5  -3    1.00    3.70 
 -12  -5  -3   63.79   13.00 
  12  -5   3   39.80    9.40 
  12   5   3   75.79    9.70 
 -12   5  -3   75.79   13.00 
 -13  -5  -3  149.79   19.40 
  13  -5   3  165.08   17.00 
  13   5   3  155.98   18.30 
 -13   5  -3  183.18   18.10 
 -14  -5  -3  283.37   29.00 
  14  -5   3  241.98   22.00 
 -14   5  -3  301.77   26.00 
  14   5   3  288.97   20.40 
 -16  -6   3  122.19   21.20 
  16  -6  -3  170.98   18.90 
 -16   6   3  111.19   18.10 
 -15  -6   3  121.39   31.00 
  15  -6  -3   91.49   14.50 
  15   6  -3   83.19   10.30 
 -14  -6   3   17.10    7.50 
 -14  -6   3    4.40    4.10 
  14  -6  -3    1.70    4.70 
  14   6  -3    2.10    3.50 
 -14   6   3   10.50    5.20 
 -13  -6   3   19.70    6.30 
 -13  -6   3   12.70    4.40 
 -13   6   3    5.40    3.80 
  13   6  -3   22.20    4.80 
 -12  -6   3    9.80    6.60 
  12  -6  -3   29.90    8.00 
 -12   6   3   43.80    9.90 
  12   6  -3   16.20    4.10 
  11  -6  -3  144.19   14.60 
 -11  -6   3  148.29   15.60 
 -11  -6   3  143.89    8.80 
  11   6  -3  125.89    8.80 
 -11   6   3  149.29   14.30 
 -10  -6   3   60.39    5.10 
  10  -6  -3   58.89    9.60 
 -10  -6   3   73.89   12.00 
 -10   6   3   53.99    9.20 
  10   6  -3   46.10    5.10 
   9  -6  -3   24.30    5.70 
  -9  -6   3   32.60    7.50 
  -9  -6   3   28.00    3.50 
   9   6  -3   21.70    3.50 
  -9   6   3   24.20    6.00 
  -8  -6   3  281.77   18.90 
  -8  -6   3  272.17   10.20 
   8  -6  -3  277.27   17.70 
  -8   6   3  306.67   17.60 
   8   6  -3  280.87   11.00 
  -8   6   3  262.47   15.70 
  -7  -6   3  223.88    7.80 
   7  -6  -3  263.37   17.20 
   7  -6  -3  232.58   14.20 
  -7  -6   3  229.48   16.00 
  -7   6   3  243.38   14.00 
   7   6  -3  230.78    8.40 
  -7   6   3  214.18   13.90 
   7   6  -3  221.68   14.20 
   6  -6  -3  342.87   17.40 
   6  -6  -3  391.46   19.80 
  -6  -6   3  348.97   19.60 
   6   6  -3  354.56   18.20 
  -6   6   3  349.96   17.30 
  -6   6   3  391.46   18.20 
   5  -6  -3 2554.84   76.99 
  -5  -6   3 2588.34   77.69 
   5  -6  -3 2464.75   73.79 
  -5   6   3 2601.34   73.99 
  -5   6   3 2511.55   74.29 
   5   6  -3 2441.06   74.89 
   4  -6  -3    5.40    2.60 
  -4  -6   3   13.40    3.50 
   4  -6  -3    6.00    2.30 
  -4   6   3   11.80    2.90 
   4   6  -3    8.70    2.60 
  -4   6   3   11.60    2.90 
   3  -6  -3  283.47   14.90 
  -3  -6   3  256.77   14.10 
   3  -6  -3  253.87   12.50 
  -3  -6   3  259.97    9.00 
   3   6  -3  264.37    9.10 
   3   6  -3  271.37   13.80 
  -3   6   3  260.47   12.20 
  -3   6   3  267.17   13.80 
  -2  -6   3 2805.92   78.79 
  -2  -6   3 2640.04   72.59 
   2  -6  -3 2658.43   75.79 
   2  -6  -3 2730.63   79.29 
   2   6  -3 2688.33   72.49 
   2   6  -3 2706.63   76.39 
   2   6  -3 2700.63   77.99 
  -2   6   3 2751.92   75.59 
  -2   6   3 2644.24   77.89 
  -1  -6   3 4050.59  110.39 
   1  -6  -3 4166.98  113.69 
   1  -6  -3 4078.19  110.09 
  -1  -6   3 4032.60  108.59 
  -1   6   3 4111.89  109.99 
   1   6  -3 4077.69  112.39 
   1   6  -3 4048.70  110.29 
   1   6  -3 3710.93  109.29 
  -1   6   3 4286.37  113.79 
   0  -6  -3 1982.20   58.09 
   0  -6  -3 2041.80   60.89 
   0  -6   3 1977.50   58.19 
   0  -6   3 2026.20   58.19 
   0   6   3 1980.40   60.49 
   0   6   3 2046.00   60.19 
   0   6   3 2073.89   58.59 
   0   6  -3 2031.60   58.29 
   0   6  -3 1977.10   57.79 
   1  -6   3  329.17   15.10 
  -1  -6  -3  330.37   15.90 
  -1  -6  -3  346.07   15.80 
   1  -6   3  308.87   14.10 
  -1   6  -3  315.87   13.80 
  -1   6  -3  323.37   15.10 
   1   6   3  351.76   15.10 
   1   6   3  329.57   15.80 
   1   6   3  334.67   15.50 
   1   6   3  336.57   15.50 
   2  -6   3   88.89    6.90 
  -2  -6  -3   78.09    7.30 
   2  -6   3   85.49    7.50 
   2   6   3   84.99    6.90 
  -2   6  -3   90.89    7.90 
   2   6   3   82.39    7.20 
   2   6   3   96.39    7.90 
  -2   6  -3   92.79    6.60 
  -3  -6  -3  190.88   11.70 
   3  -6   3  200.18   11.30 
  -3  -6  -3  196.58   12.70 
   3  -6   3  195.38   12.40 
  -3   6  -3  204.98   11.10 
   3   6   3  198.88   11.80 
  -3   6  -3  175.68   12.00 
   3   6   3  205.28   11.20 
   3   6   3  215.18   12.60 
   4  -6   3   11.50    4.10 
   4  -6   3    8.40    2.60 
  -4  -6  -3   14.40    4.00 
  -4  -6  -3    9.30    2.90 
   4   6   3    5.30    2.60 
   4   6   3   11.50    3.10 
  -4   6  -3   10.20    3.10 
   4   6   3   14.80    4.00 
  -4   6  -3   11.40    4.20 
   5  -6   3   34.30    6.60 
  -5  -6  -3   37.40    7.20 
  -5  -6  -3   32.20    5.40 
   5  -6   3   37.60    6.10 
  -5   6  -3   35.50    6.90 
   5   6   3   44.90    5.70 
   5   6   3   42.70    5.20 
   5   6   3   33.10    5.70 
  -5   6  -3   33.40    5.60 
   6  -6   3  121.49   11.20 
  -6  -6  -3  114.69    9.60 
   6  -6   3  105.49    9.50 
  -6  -6  -3  113.19   11.40 
   6   6   3  118.59   10.00 
   6   6   3  118.69    9.70 
   6   6   3  128.69   10.00 
  -6   6  -3  115.39    9.90 
   7  -6   3    4.20    3.80 
  -7  -6  -3    2.70    3.20 
   7   6   3    7.80    4.10 
  -7   6  -3    0.40    2.20 
  -8  -6  -3  687.73   34.70 
  -8  -6  -3  689.03   30.10 
   8  -6   3  732.13   32.90 
  -8   6  -3  726.73   32.40 
   8   6   3  699.73   30.30 
  -9  -6  -3  966.30   44.70 
   9  -6   3  968.00   41.20 
  -9  -6  -3  828.52   44.40 
  -9   6  -3  990.10   41.30 
   9   6   3 1062.39   39.90 
  10  -6   3  436.96   31.50 
 -10  -6  -3  480.45   36.80 
 -10   6  -3  398.06   38.60 
  10   6   3  453.05   24.30 
  11  -6   3   62.69   11.10 
 -11  -6  -3   81.39   14.50 
 -11   6  -3   73.69   12.10 
  11   6   3   88.19   10.30 
 -12  -6  -3   45.20   11.50 
  12  -6   3   24.60    7.10 
 -12   6  -3   37.90    9.40 
  12   6   3   36.80    7.10 
  13  -6   3   42.60   10.50 
 -13  -6  -3   27.50   10.70 
 -13   6  -3   29.00    8.70 
  13   6   3   24.30    6.80 
 -14  -6  -3   20.30    8.60 
 -14   6  -3    0.70    6.40 
  14   6   3   22.50    6.40 
  15  -7  -3    6.40    5.90 
 -15  -7   3    2.60    6.40 
 -15   7   3    7.80    8.40 
  15   7  -3    6.60    4.60 
 -14  -7   3    0.40    6.70 
  14  -7  -3    1.00    5.30 
 -14  -7   3    6.20    4.00 
  14   7  -3    2.50    3.20 
 -14   7   3   -0.10    3.80 
 -13  -7   3   -3.30    2.50 
 -13  -7   3    2.70    4.80 
  13   7  -3   -4.40    2.30 
 -13   7   3    4.80    4.30 
 -12  -7   3   -0.80    3.80 
  12  -7  -3    1.30    4.00 
 -12   7   3   -1.00    3.30 
  12   7  -3   -3.30    1.90 
 -11  -7   3   36.00    9.90 
 -11  -7   3   40.90    4.40 
  11  -7  -3   37.50    8.90 
 -11   7   3   33.20    8.40 
  11   7  -3   32.00    4.30 
 -10  -7   3  111.79   12.90 
  10  -7  -3   98.49   11.40 
 -10  -7   3  106.89    7.10 
 -10   7   3  107.29   11.50 
  10   7  -3  104.79    6.70 
   9  -7  -3   -0.10    2.30 
  -9  -7   3    3.20    1.10 
  -9  -7   3    1.60    3.80 
  -9   7   3   -1.10    2.00 
   9   7  -3   -0.80    1.00 
  -8  -7   3   29.40    7.00 
   8  -7  -3   45.90    8.00 
  -8  -7   3   38.00    2.30 
   8   7  -3   41.70    2.70 
  -8   7   3   30.60    6.10 
  -8   7   3   36.70    6.90 
  -7  -7   3    5.90    3.60 
   7  -7  -3    2.80    2.60 
   7  -7  -3    2.50    2.40 
  -7   7   3    0.00    1.90 
  -7   7   3    0.90    2.30 
   7   7  -3   -0.20    2.20 
   6  -7  -3  416.16   21.50 
   6  -7  -3  436.86   22.50 
  -6  -7   3  437.36   23.20 
  -6   7   3  457.45   20.60 
   6   7  -3  466.25   25.80 
   5  -7  -3   29.60    5.80 
  -5  -7   3   33.50    6.40 
   5  -7  -3   31.10    5.10 
   5   7  -3   39.50    6.50 
  -5   7   3   39.00    4.90 
  -5   7   3   29.50    5.00 
   4  -7  -3  361.26   18.80 
  -4  -7   3  376.76   19.40 
   4  -7  -3  382.46   17.30 
  -4   7   3  395.06   17.10 
  -4   7   3  363.86   17.50 
   4   7  -3  386.86   18.40 
   3  -7  -3  174.88   10.40 
  -3  -7   3  191.88   12.30 
   3  -7  -3  194.48   12.50 
  -3  -7   3  181.38    7.00 
   3   7  -3  190.18    7.20 
   3   7  -3  183.58   11.80 
  -3   7   3  199.68   11.70 
  -3   7   3  194.78   10.50 
   2  -7  -3   78.89    7.50 
  -2  -7   3   78.69    7.40 
   2  -7  -3   70.39    6.10 
  -2  -7   3   83.99    5.00 
   2   7  -3   79.19    5.00 
   2   7  -3   77.39    7.30 
  -2   7   3   85.89    6.60 
   2   7  -3   75.29    6.50 
  -2   7   3   78.49    7.20 
   1  -7  -3   36.00    4.30 
  -1  -7   3   37.90    4.10 
  -1  -7   3   47.10    4.90 
   1  -7  -3   38.70    5.90 
   1   7  -3   34.00    4.20 
  -1   7   3   43.90    4.60 
  -1   7   3   39.70    5.00 
  -1   7   3   41.90    5.20 
   1   7  -3   36.40    4.10 
   1   7  -3   43.50    5.60 
   0  -7   3  123.99    8.20 
   0  -7   3  112.39    7.60 
   0  -7  -3  115.79    8.00 
   0  -7  -3  123.29    9.20 
   0   7  -3  115.29    7.90 
   0   7   3  124.59    8.90 
   0   7  -3  105.89    7.80 
   0   7   3  123.29    9.10 
   0   7   3  121.99    8.20 
  -1  -7  -3  388.26   17.70 
   1  -7   3  366.26   16.40 
   1  -7   3  373.46   16.70 
  -1  -7  -3  366.96   18.00 
   1   7   3  382.76   16.90 
   1   7   3  389.26   18.10 
  -1   7  -3  403.56   16.40 
   1   7   3  372.76   17.50 
  -1   7  -3  348.17   16.60 
   2  -7   3  665.43   25.50 
  -2  -7  -3  672.13   25.80 
  -2  -7  -3  677.53   27.70 
   2  -7   3  705.83   26.50 
   2   7   3  670.83   26.50 
   2   7   3  717.63   26.00 
  -2   7  -3  691.23   25.00 
  -2   7  -3  698.93   27.00 
   2   7   3  678.93   26.80 
  -3  -7  -3  174.28   12.50 
   3  -7   3  180.38   12.00 
   3  -7   3  173.68   11.00 
  -3   7  -3  166.58   10.40 
   3   7   3  174.38   11.50 
   3   7   3  183.68   11.70 
  -3   7  -3  174.98   12.20 
   3   7   3  168.58   10.20 
   4  -7   3   12.40    4.20 
  -4  -7  -3    5.70    2.30 
  -4  -7  -3    6.70    3.40 
   4  -7   3    7.50    2.80 
   4   7   3    8.60    3.00 
   4   7   3    0.60    2.30 
  -4   7  -3    8.20    3.50 
   4   7   3    7.10    2.50 
  -4   7  -3   15.10    3.50 
   5  -7   3  122.19   10.70 
   5  -7   3  100.69    8.70 
  -5  -7  -3   93.59    8.70 
  -5  -7  -3   97.59   17.70 
  -5   7  -3  110.89   10.70 
   5   7   3  111.59    8.70 
   5   7   3  121.29    9.90 
   5   7   3  107.69    9.40 
  -5   7  -3  118.89   12.10 
  -6  -7  -3   74.69   11.40 
   6  -7   3   80.09    8.20 
  -6  -7  -3   76.79    8.00 
   6  -7   3   77.89    9.30 
   6   7   3   81.69    8.20 
  -6   7  -3   86.79    8.80 
   6   7   3   91.59    8.80 
   6   7   3   85.89    8.50 
  -7  -7  -3   12.80    3.80 
  -7  -7  -3    8.50    4.90 
   7  -7   3    5.40    4.00 
   7   7   3   15.10    4.20 
  -7   7  -3   12.40    4.20 
   7   7   3   10.70    4.50 
  -8  -7  -3   53.99    7.40 
   8  -7   3   55.89    9.50 
  -8  -7  -3   54.39   10.50 
  -8   7  -3   44.80    8.40 
   8   7   3   59.39    9.20 
   8   7   3   67.39    8.00 
  -9  -7  -3  123.29   11.30 
   9  -7   3  118.49   13.10 
  -9  -7  -3   89.89   14.20 
   9   7   3   97.69   11.10 
   9   7   3  101.99   11.10 
  -9   7  -3  119.79   12.20 
 -10  -7  -3  137.49   16.80 
  10  -7   3  120.09   13.30 
  10   7   3  138.49   13.00 
 -10   7  -3  145.79   14.30 
  11  -7   3    3.20    3.90 
 -11  -7  -3    4.60    4.50 
  11   7   3    5.00    3.70 
 -11   7  -3    0.70    3.40 
  12  -7   3   -4.90    4.00 
 -12  -7  -3   10.70    5.00 
  12   7   3    6.20    3.70 
 -12   7  -3    3.70    4.70 
  13  -7   3   40.10    9.20 
 -13  -7  -3   43.90   12.20 
  13   7   3   39.80    7.80 
 -15  -8   3  106.69   18.40 
  15  -8  -3  127.19   16.10 
 -15   8   3  127.39   16.30 
  14  -8  -3   17.40    6.60 
 -14  -8   3   25.40    8.60 
 -14   8   3   19.80    7.50 
  14   8  -3   17.20    4.00 
 -13  -8   3   13.80    6.20 
 -13  -8   3   15.50    3.80 
  13  -8  -3   17.70    6.10 
 -13   8   3   12.10    5.90 
  13   8  -3   12.90    3.30 
 -12  -8   3   -2.70    4.40 
 -12  -8   3    3.80    2.10 
  12  -8  -3   15.00    8.70 
 -12   8   3   -0.80    3.30 
  12   8  -3    0.40    2.00 
 -11  -8   3  310.27   38.60 
  11  -8  -3  327.87   22.80 
 -11  -8   3  327.67   12.30 
 -11   8   3  278.57   33.30 
  11   8  -3  295.77   12.50 
  10  -8  -3  218.58   17.80 
 -10  -8   3  215.88    8.40 
 -10  -8   3  221.88   19.60 
 -10   8   3  237.18   17.50 
  -9  -8   3    4.80    3.40 
   9  -8  -3   -1.40    2.10 
  -9   8   3   -1.50    1.70 
  -8  -8   3  219.08   17.60 
   8  -8  -3  226.28   16.80 
  -8   8   3  249.18   16.00 
   7  -8  -3  898.21   36.50 
   7  -8  -3  757.22   32.40 
  -7  -8   3  821.42   36.60 
  -7   8   3  850.71   33.10 
   7   8  -3  810.72   33.70 
  -7   8   3  802.62   32.30 
  -6  -8   3 1356.16   49.40 
   6  -8  -3 1275.17   46.90 
   6  -8  -3 1242.48   44.10 
  -6   8   3 1298.87   44.20 
  -6   8   3 1255.17   43.90 
   6   8  -3 1258.17   45.40 
   5  -8  -3 1052.59   39.50 
   5  -8  -3 1022.70   36.50 
  -5  -8   3  988.30   39.60 
  -5   8   3 1002.40   36.40 
   5   8  -3 1022.20   38.00 
  -5   8   3 1017.60   35.90 
   4  -8  -3   88.89    7.80 
  -4  -8   3  102.69    9.60 
   4  -8  -3  111.59    9.90 
  -4   8   3   92.79    8.00 
  -4   8   3   88.89    7.50 
   4   8  -3   86.99    8.40 
   3  -8  -3  537.45   22.20 
  -3  -8   3  544.45   24.60 
   3  -8  -3  562.74   24.70 
  -3  -8   3  534.45   17.30 
   3   8  -3  572.94   23.30 
   3   8  -3  558.64   17.10 
  -3   8   3  536.95   22.90 
   3   8  -3  528.35   23.80 
  -3   8   3  574.84   22.20 
   2  -8  -3  288.17   16.20 
  -2  -8   3  310.57   16.70 
   2  -8  -3  290.47   14.60 
  -2  -8   3  284.07   11.30 
   2   8  -3  287.97   14.70 
   2   8  -3  298.17   12.00 
   2   8  -3  303.67   16.50 
  -2   8   3  314.87   14.70 
  -2   8   3  301.47   15.40 
  -1  -8   3   18.10    3.70 
  -1  -8   3    8.60    2.40 
   1  -8  -3   15.50    4.10 
   1  -8  -3   12.80    3.10 
   1   8  -3   11.50    3.00 
  -1   8   3   25.30    4.40 
  -1   8   3   12.40    3.80 
   1   8  -3   14.60    3.40 
  -1   8   3    8.00    2.90 
   1   8  -3   11.30    3.70 
   0  -8  -3  830.42   30.80 
   0  -8   3  814.72   29.10 
   0  -8  -3  773.92   28.60 
   0  -8   3  783.12   27.20 
   0   8  -3  775.02   27.80 
   0   8   3  808.62   29.90 
   0   8  -3  782.82   28.40 
   0   8   3  821.82   31.00 
   0   8   3  800.42   29.00 
  -1  -8  -3   30.50    5.80 
   1  -8   3   36.60    5.50 
  -1  -8  -3   29.00    5.00 
   1  -8   3   35.20    4.60 
   1   8   3   37.50    4.80 
  -1   8  -3   36.10    4.60 
  -1   8  -3   26.50    5.00 
   1   8   3   30.10    5.50 
   1   8   3   34.30    5.60 
  -2  -8  -3 1201.18   40.80 
   2  -8   3 1256.47   41.30 
   2  -8   3 1209.78   40.70 
  -2  -8  -3 1218.18   43.50 
   2   8   3 1238.98   41.80 
  -2   8  -3 1167.48   41.30 
   2   8   3 1207.78   41.40 
   2   8   3 1229.18   42.50 
  -2   8  -3 1205.38   39.80 
   2   8   3 1263.47   40.80 
   3  -8   3   91.89    8.40 
   3  -8   3   82.29    7.60 
  -3  -8  -3   94.89    9.40 
  -3   8  -3   83.19    8.80 
   3   8   3   83.89    8.00 
   3   8   3   84.59    7.20 
  -3   8  -3   80.49    7.20 
   3   8   3   80.09    7.60 
  -4  -8  -3  440.96   23.40 
   4  -8   3  433.86   20.80 
   4  -8   3  477.45   22.50 
   4   8   3  434.46   21.50 
  -4   8  -3  456.55   23.20 
  -4   8  -3  466.65   20.70 
   4   8   3  445.26   21.10 
   4   8   3  475.15   19.80 
   5  -8   3 1677.13   56.39 
  -5  -8  -3 1678.13   55.29 
  -5  -8  -3 1741.83   60.89 
   5  -8   3 1826.02   58.49 
   5   8   3 1757.62   53.99 
  -5   8  -3 1732.23   55.99 
   5   8   3 1742.03   56.39 
   5   8   3 1684.33   56.99 
  -5   8  -3 1683.03   60.89 
  -6  -8  -3  153.08   11.40 
  -6  -8  -3  140.89   13.40 
   6  -8   3  183.38   13.70 
   6  -8   3  127.49   14.20 
   6   8   3  142.19   10.60 
   6   8   3  155.88   11.90 
  -6   8  -3  133.39   11.20 
   6   8   3  150.48   12.60 
  -7  -8  -3   78.39    8.10 
   7  -8   3   88.89   10.20 
  -7  -8  -3   71.99   11.50 
  -7   8  -3   71.49    8.70 
   7   8   3   67.19    8.30 
   7   8   3   54.89    8.50 
   8  -8   3  953.70   40.10 
  -8  -8  -3  938.61   44.20 
  -8  -8  -3  874.61   36.10 
   8   8   3 1006.10   37.20 
  -8   8  -3  882.91   38.20 
   8   8   3  932.21   37.90 
  -9  -8  -3  764.32   39.70 
  -9  -8  -3  735.43   32.40 
   9  -8   3  746.63   35.60 
   9   8   3  764.52   32.60 
  -9   8  -3  755.92   35.20 
   9   8   3  749.92   33.50 
 -10  -8  -3  115.69   14.20 
  10  -8   3  121.29   13.50 
  10   8   3  124.29   12.30 
 -10   8  -3  145.59   14.10 
  11  -8   3   84.49   13.20 
 -11  -8  -3  103.29   13.10 
 -11   8  -3   90.09   11.70 
  11   8   3   79.49   11.20 
  12  -8   3   51.69   10.30 
 -12  -8  -3   68.99   14.00 
  12   8   3   63.69    9.40 
 -12   8  -3   54.79   11.40 
  13  -8   3   78.69   13.40 
 -13  -8  -3   60.09   14.90 
  13   8   3   85.59   10.60 
 -13   8  -3   72.49   12.80 
  15  -9  -3  110.79   17.30 
 -15  -9   3  103.39   18.30 
 -15   9   3  134.29   15.90 
  14  -9  -3   18.70    7.50 
 -14  -9   3   30.70    9.20 
 -14   9   3   31.50    9.60 
 -13  -9   3  245.38   10.20 
  13  -9  -3  217.78   20.70 
 -13  -9   3  241.78   23.70 
  13   9  -3  242.38   10.40 
  13   9  -3  256.67   10.70 
 -13   9   3  247.18   21.30 
  12  -9  -3 1748.33   68.89 
 -12  -9   3 1780.12   73.39 
 -12   9   3 1731.23   66.59 
  12   9  -3 1763.92   48.30 
 -11  -9   3 2646.04   95.19 
  11  -9  -3 2501.55   89.79 
 -11   9   3 2736.53   88.79 
  10  -9  -3 1796.82   67.59 
 -10  -9   3 1888.51   71.99 
 -10   9   3 1817.92   65.09 
   9  -9  -3   21.40    5.90 
  -9  -9   3   18.80    6.50 
  -9   9   3   13.60    4.80 
   8  -9  -3  391.16   23.60 
  -8  -9   3  407.46   25.10 
  -8   9   3  394.56   21.50 
  -7  -9   3  471.95   26.70 
   7  -9  -3  506.55   26.30 
  -7   9   3  467.05   23.20 
   6  -9  -3  109.29    9.80 
   6  -9  -3  119.39   11.40 
  -6  -9   3  116.99   11.90 
  -6   9   3  126.39   10.40 
   6   9  -3  112.39   10.70 
  -6   9   3  115.79    9.90 
   5  -9  -3  252.37   16.50 
   5  -9  -3  236.88   17.50 
  -5  -9   3  263.17   17.40 
  -5   9   3  261.07   14.60 
  -5   9   3  231.98   14.20 
   5   9  -3  192.28   21.60 
  -4  -9   3   77.39    8.20 
   4  -9  -3   55.59    7.00 
   4  -9  -3   72.09    7.00 
  -4  -9   3   53.09    2.80 
  -4   9   3   54.89    6.10 
  -4   9   3   53.69    6.30 
   4   9  -3   55.79    2.70 
   4   9  -3   58.79    7.10 
   3  -9  -3  107.09    9.80 
  -3  -9   3  112.79   10.30 
   3  -9  -3  106.69    8.70 
  -3  -9   3  107.89    5.40 
   3   9  -3  102.39    9.30 
  -3   9   3   92.69    8.30 
   3   9  -3  109.19    5.70 
   3   9  -3   97.89    8.70 
  -3   9   3   99.79    8.10 
  -2  -9   3 2595.34   72.49 
  -2  -9   3 2714.83   81.89 
   2  -9  -3 2595.24   77.99 
   2  -9  -3 2651.63   80.89 
   2   9  -3 2731.53   81.59 
  -2   9   3 2636.84   78.99 
   2   9  -3 2709.13   78.99 
  -2   9   3 2680.93   77.89 
  -1  -9   3 6733.13  184.28 
  -1  -9   3 6748.42  179.88 
   1  -9  -3 6997.20  187.08 
   1  -9  -3 6652.53  183.88 
   1   9  -3 6785.72  180.88 
  -1   9   3 6928.51  184.18 
  -1   9   3 6701.73  184.88 
  -1   9   3 6982.90  187.78 
   1   9  -3 6926.11  187.78 
   1   9  -3 6945.81  184.48 
   0  -9  -3 8201.38  214.08 
   0  -9  -3 7827.62  211.68 
   0  -9   3 7794.32  208.78 
   0  -9   3 7973.10  211.98 
   0   9  -3 8027.90  211.58 
   0   9  -3 7624.74  209.78 
   0   9   3 7721.33  212.28 
   0   9  -3 8026.40  215.18 
   0   9   3 8128.59  215.38 
   0   9   3 7907.81  212.08 
  -1  -9  -3  337.57   18.70 
  -1  -9  -3  350.96   17.70 
   1  -9   3  337.97   16.10 
   1  -9   3  347.67   17.10 
  -1   9  -3  346.57   17.00 
   1   9   3  372.26   19.20 
  -1   9  -3  384.76   17.30 
   1   9   3  336.07   17.30 
   1   9   3  366.66   17.80 
   2  -9   3   22.30    4.50 
   2  -9   3   17.70    4.10 
  -2  -9  -3   21.00    4.40 
  -2  -9  -3   10.60    4.30 
  -2   9  -3   18.30    3.90 
   2   9   3   23.30    5.00 
  -2   9  -3   25.90    5.40 
   2   9   3   13.50    4.30 
   2   9   3   19.50    4.10 
   2   9   3   14.10    3.40 
  -3  -9  -3 3181.28   94.59 
   3  -9   3 3022.60   90.19 
   3  -9   3 3036.80   95.99 
   3   9   3 3051.09   90.09 
   3   9   3 3174.58   88.79 
   3   9   3 3060.19   91.89 
  -3   9  -3 2931.11   93.89 
  -3   9  -3 3107.39   89.29 
   4  -9   3 1933.41   62.29 
   4  -9   3 1956.70   62.69 
  -4   9  -3 1893.51   63.89 
   4   9   3 2036.40   59.89 
   4   9   3 1935.41   65.69 
   4   9   3 1962.10   61.99 
   5  -9   3 1159.78   42.00 
   5  -9   3 1121.49   42.30 
  -5  -9  -3 1140.69   46.10 
   5   9   3 1111.59   40.80 
   5   9   3 1116.99   42.30 
  -5   9  -3 1158.98   41.20 
   5   9   3 1117.29   38.40 
  -6  -9  -3    5.90    4.20 
   6  -9   3    7.60    3.70 
   6   9   3    6.60    3.00 
  -6   9  -3    1.70    2.40 
   6   9   3   10.40    3.70 
  -7  -9  -3   42.60    6.90 
  -7  -9  -3   35.30    8.10 
   7  -9   3   39.00    7.80 
   7   9   3   39.90    6.60 
   7   9   3   41.60    6.80 
  -7   9  -3   35.60    7.20 
  -8  -9  -3   15.00    5.90 
  -8  -9  -3   21.30    4.90 
   8  -9   3   11.50    5.10 
   8   9   3    8.90    4.50 
  -8   9  -3    8.90    4.80 
   8   9   3    3.20    4.00 
  -9  -9  -3  161.58   13.60 
  -9  -9  -3  161.68   17.40 
   9  -9   3  154.08   15.50 
   9   9   3  167.88   13.60 
   9   9   3  155.08   13.30 
  -9   9  -3  161.08   14.90 
  10  -9   3  911.11   42.00 
 -10  -9  -3  866.41   45.90 
 -10   9  -3  854.61   40.50 
  10   9   3  888.51   36.50 
 -11  -9  -3  206.48   21.20 
  11  -9   3  175.48   17.50 
  11   9   3  228.28   16.10 
 -11   9  -3  176.08   16.80 
  12  -9   3   11.40    6.20 
 -12  -9  -3   -6.10    4.90 
  12   9   3    3.30    4.10 
 -12   9  -3   -2.60    4.70 
 -13  -9  -3  326.27   51.09 
  13  -9   3  332.87   40.20 
  13   9   3  293.97   19.00 
 -15 -10   3  199.58   23.30 
  15 -10  -3  196.68   21.60 
 -15  10   3  212.68   20.80 
  14 -10  -3   86.39   15.00 
 -14 -10   3  105.29   18.70 
 -14  10   3  115.99   13.80 
  13 -10  -3    0.70    4.40 
 -13 -10   3    5.70    4.90 
 -13  10   3    4.80    5.50 
 -12 -10   3  176.98   19.60 
  12 -10  -3  144.19   16.20 
 -12  10   3  135.09   15.20 
 -11 -10   3  283.27   24.50 
 -11  10   3  280.27   21.00 
 -10 -10   3  377.46   26.60 
  10 -10  -3  310.97   23.00 
 -10  10   3  341.77   21.90 
  -9 -10   3  335.07   24.00 
   9 -10  -3  305.37   21.80 
  -9  10   3  342.17   20.80 
  -8 -10   3  624.04   33.20 
   8 -10  -3  636.04   32.10 
  -8  10   3  602.14   28.70 
  -7 -10   3 4310.07  132.59 
   7 -10  -3 4403.56  130.29 
  -7  10   3 4311.87  125.59 
   6 -10  -3 5237.58  153.68 
   6 -10  -3 5470.75  157.68 
  -6 -10   3 5467.15  159.68 
  -6  10   3 5463.25  154.08 
  -6  10   3 5834.82  154.78 
   6  10  -3 5378.96  156.18 
   5 -10  -3 3457.35  103.79 
   5 -10  -3 3293.87   99.89 
  -5 -10   3 3401.66  105.09 
  -5  10   3 3336.27   99.39 
  -5  10   3 3457.25   99.39 
   5  10  -3 3466.85  102.79 
   4 -10  -3 1256.17   45.00 
  -4 -10   3 1276.57   36.00 
  -4 -10   3 1335.57   49.20 
   4  10  -3 1317.77   47.90 
  -4  10   3 1376.16   45.00 
  -4  10   3 1307.47   45.40 
   4  10  -3 1310.37   46.50 
   4  10  -3 1322.87   35.60 
  -3 -10   3  133.09   11.70 
   3 -10  -3  128.69   10.20 
  -3 -10   3  135.29    6.80 
   3 -10  -3  134.19   11.30 
   3  10  -3  138.09   10.70 
   3  10  -3  141.29    7.20 
  -3  10   3  149.88   10.90 
  -3  10   3  146.89   10.20 
   3  10  -3  129.29   11.20 
   2 -10  -3 2367.46   72.79 
  -2 -10   3 2376.46   66.79 
   2 -10  -3 2421.96   75.39 
  -2  10   3 2471.55   72.69 
  -2  10   3 2436.56   73.19 
   2  10  -3 2400.36   73.29 
   2  10  -3 2360.36   67.59 
   2  10  -3 2426.46   76.19 
   1 -10  -3 4151.58  117.39 
  -1 -10   3 4031.30  110.09 
   1 -10  -3 4014.00  114.79 
  -1 -10   3 4063.79  115.19 
  -1  10   3 4052.59  118.19 
  -1  10   3 4068.39  115.19 
   1  10  -3 4057.59  111.39 
  -1  10   3 4047.20  114.69 
   1  10  -3 3976.60  118.19 
   1  10  -3 4128.79  115.19 
   0 -10  -3 1051.09   38.20 
   0 -10   3 1013.60   34.00 
   0 -10  -3  969.40   36.30 
   0 -10   3 1030.00   37.00 
   0  10   3 1082.89   37.50 
   0  10  -3 1041.20   36.60 
   0  10  -3 1013.80   39.30 
   0  10  -3 1028.50   35.20 
   0  10   3 1052.99   39.80 
   0  10   3  979.00   36.70 
   1 -10   3   20.40    4.40 
  -1 -10  -3   20.20    4.30 
   1 -10   3   24.00    4.70 
  -1  10  -3   32.50    5.60 
   1  10   3   29.70    5.60 
   1  10   3   31.70    6.30 
   1  10   3   25.90    4.90 
  -1  10  -3   28.50    5.30 
  -2 -10  -3   40.00    7.40 
   2 -10   3   40.70    6.50 
   2 -10   3   41.20    6.30 
  -2 -10  -3   44.50    5.70 
  -2  10  -3   43.40    6.80 
   2  10   3   41.40    6.90 
  -2  10  -3   51.59    6.10 
   2  10   3   44.20    6.70 
   2  10   3   45.80    6.10 
   2  10   3   48.60    6.10 
  -3 -10  -3  905.61   38.00 
  -3 -10  -3  898.41   33.20 
   3 -10   3  913.71   34.30 
   3  10   3  903.31   36.10 
   3  10   3  893.11   34.10 
  -3  10  -3  893.61   33.70 
   3  10   3  903.81   38.40 
   3  10   3  955.70   33.50 
  -3  10  -3  874.71   35.40 
   4 -10   3 2976.40   90.29 
  -4 -10  -3 2978.60   94.89 
   4 -10   3 3014.10   90.19 
   4  10   3 3029.10   89.09 
  -4  10  -3 2963.70   91.89 
  -4  10  -3 3023.60   88.99 
   4  10   3 2945.91   91.59 
   5 -10   3 2109.89   70.79 
  -5 -10  -3 2131.69   75.19 
   5 -10   3 2197.78   70.89 
  -5  10  -3 2239.68   69.69 
   5  10   3 2264.77   66.69 
   5  10   3 2276.47   69.49 
   5  10   3 2127.99   71.19 
   6 -10   3  540.35   26.90 
  -6 -10  -3  548.35   30.20 
   6  10   3  569.54   23.60 
  -6  10  -3  518.25   25.60 
   6  10   3  534.05   25.10 
   7 -10   3  269.77   18.60 
  -7 -10  -3  242.48   20.00 
   7  10   3  264.17   16.70 
   7  10   3  257.67   15.40 
  -7  10  -3  290.67   18.30 
  -8 -10  -3 2211.18   82.39 
   8 -10   3 2367.96   77.89 
  -8  10  -3 2241.38   75.69 
   8  10   3 2271.47   70.89 
   8  10   3 2190.38   72.89 
  -9 -10  -3 3785.42  128.09 
  -9 -10  -3 3541.45  109.69 
   9 -10   3 3683.93  115.79 
   9  10   3 3657.23  110.99 
   9  10   3 3701.13  108.79 
  -9  10  -3 3718.73  125.69 
  10 -10   3 1709.13   67.09 
 -10 -10  -3 1849.91   75.09 
  10  10   3 1802.12   61.19 
 -10  10  -3 1834.72   67.39 
  11 -10   3  174.98   17.60 
 -11 -10  -3  212.28   21.40 
 -11  10  -3  193.18   17.30 
  11  10   3  197.78   15.10 
  12 -10   3  143.79   15.80 
 -12 -10  -3  152.88   20.10 
 -12  10  -3  123.39   14.80 
  12  10   3  138.79   13.00 
  13 -10   3  137.39   15.70 
 -13 -10  -3   93.69   19.00 
  13  10   3  102.89   11.30 
 -13  10  -3   99.49   16.50 
  15 -11  -3  166.28   38.10 
 -15 -11   3  197.68   25.10 
 -15  11   3  260.67   23.50 
 -14 -11   3  216.48   45.40 
  14 -11  -3  172.08   19.70 
 -14  11   3  195.98   24.60 
 -13 -11   3  240.18   24.50 
  13 -11  -3  200.68   20.50 
 -13  11   3  240.68   20.50 
 -12 -11   3 1372.06   64.09 
  12 -11  -3 1397.96   61.09 
 -12  11   3 1437.26   57.99 
 -11 -11   3 3465.85  120.49 
  11 -11  -3 3455.75  116.09 
 -11  11   3 3580.34  112.39 
  10 -11  -3 1142.49   50.49 
 -10 -11   3 1102.09   55.89 
 -10  11   3 1147.19   49.40 
  -9 -11   3  452.45   29.00 
   9 -11  -3  482.05   28.60 
  -9  11   3  441.16   25.10 
   8 -11  -3  117.09   12.90 
  -8 -11   3  117.89   14.00 
  -8  11   3  137.59   12.30 
   7 -11  -3  199.68   16.40 
  -7 -11   3  171.08   16.00 
  -7  11   3  162.28   13.20 
   6 -11  -3   23.30    6.80 
  -6 -11   3   37.90    8.70 
  -6  11   3   31.60    6.40 
  -5 -11   3 1030.10   42.80 
   5 -11  -3 1000.10   38.80 
   5 -11  -3 1030.20   41.50 
  -5  11   3 1001.10   37.70 
  -5  11   3  964.80   37.50 
   5  11  -3 1029.90   40.90 
  -4 -11   3   84.19    4.80 
  -4 -11   3   85.29    9.80 
   4 -11  -3  106.69   10.60 
   4 -11  -3  103.69    9.50 
   4  11  -3   86.59    9.30 
   4  11  -3   93.99   10.00 
   4  11  -3   93.69    4.80 
  -4  11   3   96.39    9.00 
  -4  11   3   92.69    8.60 
  -3 -11   3  597.14   28.90 
  -3 -11   3  611.14   20.20 
   3 -11  -3  582.14   25.90 
   3  11  -3  571.84   29.60 
  -3  11   3  566.24   26.90 
  -3  11   3  607.64   25.70 
   3  11  -3  605.14   20.50 
   3  11  -3  655.03   27.60 
   2 -11  -3 3241.08   97.39 
   2 -11  -3 3369.36  100.29 
  -2 -11   3 3333.57   91.09 
   2  11  -3 3348.96  101.39 
   2  11  -3 3299.67   91.89 
  -2  11   3 3293.27   97.29 
  -2  11   3 3398.26   97.49 
   2  11  -3 3364.36   98.29 
   1 -11  -3 9115.29  245.68 
  -1 -11   3 9291.57  240.48 
   1 -11  -3 9165.28  247.88 
  -1 -11   3 9144.99  246.08 
   1  11  -3 9347.17  246.08 
   1  11  -3 9095.79  249.78 
  -1  11   3 9169.58  249.78 
   1  11  -3 9005.20  241.28 
  -1  11   3 9433.06  245.88 
  -1  11   3 8894.91  244.98 
   0 -11  -3 2893.61   86.79 
   0 -11   3 2864.91   81.59 
   0 -11  -3 2760.82   84.99 
   0 -11   3 2838.42   85.39 
   0  11   3 2855.81   84.79 
   0  11   3 2936.41   85.99 
   0  11  -3 2788.62   82.69 
   0  11   3 2874.61   88.89 
   0  11  -3 2799.42   88.59 
   0  11  -3 2888.61   85.09 
  -1 -11  -3  134.09   10.60 
   1 -11   3  127.99    9.50 
   1 -11   3  124.29   10.20 
   1  11   3  131.09   10.00 
  -1  11  -3  128.49   10.20 
   1  11   3  124.99   10.30 
   1  11   3  139.79   11.90 
  -1  11  -3  112.39    9.50 
  -2 -11  -3 2238.68   69.69 
  -2 -11  -3 2293.27   74.79 
   2 -11   3 2207.08   69.19 
   2  11   3 2190.58   69.29 
   2  11   3 2321.37   70.09 
   2  11   3 2340.87   72.19 
   2  11   3 2176.68   80.49 
  -2  11  -3 2189.88   69.89 
   3 -11   3 1634.74   56.59 
  -3 -11  -3 1707.33   55.09 
   3 -11   3 1752.42   56.49 
  -3 -11  -3 1746.23   61.49 
   3  11   3 1761.32   59.89 
   3  11   3 1698.53   55.79 
   3  11   3 1652.03   54.39 
  -3  11  -3 1644.74   57.39 
  -3  11  -3 1732.73   55.99 
   3  11   3 1756.62   58.89 
  -4 -11  -3 1617.74   60.79 
   4 -11   3 1693.63   57.39 
   4 -11   3 1695.23   56.69 
   4  11   3 1679.13   53.29 
  -4  11  -3 1699.03   55.79 
   4  11   3 1632.44   58.09 
   4  11   3 1659.93   55.19 
   5 -11   3 1086.69   42.20 
  -5 -11  -3 1076.09   46.40 
   5  11   3 1053.99   39.90 
  -5  11  -3 1115.69   41.20 
   5  11   3 1089.79   37.80 
   6 -11   3  144.59   13.00 
  -6 -11  -3  145.89   14.80 
   6  11   3  128.59   10.00 
   6  11   3  129.29   11.10 
  -6  11  -3  159.78   12.50 
   7 -11   3   -1.60    2.70 
  -7 -11  -3    9.40    4.70 
   7  11   3    4.20    3.40 
  -7  11  -3    5.90    3.60 
   7  11   3   -1.60    3.30 
  -8 -11  -3   19.00    7.10 
   8 -11   3   16.70    7.00 
   8  11   3   20.10    5.70 
  -8  11  -3    6.20    4.50 
   8  11   3   12.90    4.30 
   9 -11   3  185.08   17.20 
  -9 -11  -3  185.58   19.10 
   9  11   3  198.98   15.20 
  -9  11  -3  179.18   16.30 
   9  11   3  167.68   13.80 
 -10 -11  -3  180.88   19.60 
  10 -11   3  191.68   17.60 
 -10  11  -3  155.38   15.60 
  10  11   3  206.38   15.10 
  10  11   3  148.89   17.40 
  11 -11   3  107.49   14.20 
 -11 -11  -3  156.58   18.80 
  11  11   3   97.69   11.20 
 -11  11  -3  120.59   14.20 
  12 -11   3   38.00    8.90 
 -12 -11  -3   38.30   12.40 
 -12  11  -3   30.00    9.30 
  12  11   3   58.99    8.90 
  13 -11   3  236.88   21.60 
 -13 -11  -3  216.58   23.90 
 -13  11  -3  222.58   21.30 
  13  11   3  211.48   15.70 
 -14 -12   3   64.19   15.40 
  14 -12  -3   63.89   14.20 
 -14  12   3   66.69   13.00 
  13 -12  -3    6.20    5.90 
 -13 -12   3   12.50    7.40 
 -13  12   3   14.40    5.60 
  12 -12  -3   70.29   13.10 
 -12 -12   3   89.99   16.10 
 -12  12   3   79.39   13.20 
 -11 -12   3   27.90    9.60 
  11 -12  -3   20.70    7.30 
 -11  12   3   15.80    6.70 
 -10 -12   3   10.10    5.70 
  10 -12  -3   32.10   13.20 
 -10  12   3   20.40    6.40 
   9 -12  -3  227.28   19.20 
  -9 -12   3  233.48   20.70 
  -9  12   3  222.38   17.30 
   8 -12  -3  352.86   23.50 
  -8 -12   3  353.26   25.20 
  -8  12   3  341.57   20.90 
  -7 -12   3  994.00   45.80 
   7 -12  -3  989.50   42.90 
  -7  12   3  905.61   38.20 
  -6 -12   3 2350.96   81.79 
   6 -12  -3 2370.76   79.79 
  -6  12   3 2358.86   75.09 
   5 -12  -3  524.25   27.50 
  -5 -12   3  546.45   29.80 
   5 -12  -3  564.64   29.00 
  -5  12   3  577.04   26.10 
   5  12  -3  592.54   28.30 
   5  12  -3  546.85   34.20 
   4 -12  -3 1375.26   49.30 
  -4 -12   3 1380.66   53.29 
  -4 -12   3 1344.17   39.50 
   4 -12  -3 1401.76   51.89 
  -4  12   3 1413.76   48.20 
   4  12  -3 1387.86   39.20 
  -4  12   3 1321.67   47.60 
   4  12  -3 1372.76   52.19 
   4  12  -3 1430.76   50.49 
  -3 -12   3  259.17   11.70 
   3 -12  -3  260.57   16.20 
  -3 -12   3  259.77   18.30 
   3 -12  -3  284.47   18.00 
   3  12  -3  266.67   17.90 
   3  12  -3  265.47   11.90 
  -3  12   3  272.97   15.90 
  -3  12   3  255.37   15.60 
   3  12  -3  278.77   17.00 
   2 -12  -3    4.90    5.20 
  -2 -12   3    7.90    2.30 
  -2  12   3    5.00    3.60 
   2  12  -3    5.40    4.40 
   2  12  -3    4.40    2.90 
   2  12  -3    7.50    3.80 
  -1 -12   3  444.16   18.40 
   1 -12  -3  470.15   23.60 
  -1 -12   3  382.76   31.40 
  -1  12   3  433.66   22.10 
   1  12  -3  448.66   19.50 
   1  12  -3  439.36   29.50 
  -1  12   3  465.25   21.90 
   1  12  -3  439.06   23.70 
   0 -12  -3   95.39    9.40 
   0 -12   3   99.59    8.00 
   0 -12   3   69.69   15.20 
   0  12  -3   84.09   12.20 
   0  12   3  100.89    8.90 
   0  12  -3   79.89    8.20 
   0  12   3   78.69    9.30 
   0  12  -3   69.59   11.40 
   1 -12   3  173.28   11.60 
   1 -12   3  160.18   12.50 
  -1 -12  -3  160.18   12.30 
   1  12   3  189.98   14.60 
   1  12   3  206.18   15.10 
   1  12   3  174.98   12.10 
  -1  12  -3  169.68   12.40 
  -1  12  -3  162.28   12.40 
   2 -12   3   23.70    5.20 
  -2 -12  -3   35.60    6.40 
  -2 -12  -3   29.40    7.20 
   2 -12   3   27.30    5.80 
   2  12   3   33.90    5.70 
   2  12   3   24.70    5.30 
   2  12   3   30.30    6.40 
  -2  12  -3   29.60    6.10 
  -2  12  -3   39.90    6.90 
   3 -12   3  377.86   19.80 
  -3 -12  -3  386.96   19.20 
  -3 -12  -3  366.76   22.90 
   3 -12   3  365.46   20.50 
  -3  12  -3  350.36   19.20 
   3  12   3  383.46   21.50 
   3  12   3  345.87   18.80 
   3  12   3  385.66   19.00 
   3  12   3  347.17   21.30 
  -3  12  -3  365.66   20.80 
   4 -12   3 1320.47   47.00 
  -4 -12  -3 1259.27   51.39 
   4  12   3 1233.08   45.00 
  -4  12  -3 1284.97   46.10 
   4  12   3 1318.87   44.00 
   4  12   3 1261.77   49.10 
  -5 -12  -3  892.51   41.40 
   5 -12   3  892.31   37.00 
   5  12   3  817.52   34.10 
   5  12   3  869.61   32.50 
  -5  12  -3  940.61   36.60 
  -6 -12  -3  239.98   20.10 
   6 -12   3  263.27   18.10 
   6  12   3  251.47   14.40 
  -6  12  -3  246.38   16.90 
   6  12   3  251.47   16.00 
  -7 -12  -3  558.74   33.60 
   7 -12   3  627.14   31.10 
   7  12   3  587.24   25.60 
  -7  12  -3  603.54   29.70 
   7  12   3  605.64   27.80 
   8 -12   3  214.88   17.70 
  -8 -12  -3  219.38   20.30 
   8  12   3  205.08   14.30 
   8  12   3  213.48   15.30 
  -8  12  -3  211.28   16.90 
  -9 -12  -3  475.35   32.10 
   9 -12   3  417.96   26.70 
  -9  12  -3  410.66   25.40 
   9  12   3  400.76   22.80 
   9  12   3  396.36   21.40 
 -10 -12  -3  388.46   30.30 
  10 -12   3  410.56   27.00 
 -10  12  -3  368.56   24.40 
  10  12   3  388.46   22.70 
  10  12   3  396.06   21.70 
 -11 -12  -3  244.28   24.80 
  11 -12   3  214.88   20.10 
 -11  12  -3  229.88   19.90 
  11  12   3  239.58   16.70 
 -12 -12  -3   28.90   11.10 
  12  12   3   45.70    7.90 
 -12  12  -3   47.80   11.40 
 -14 -13   3   24.80   10.40 
 -14  13   3   36.10    9.60 
 -13 -13   3  119.49   19.40 
  13 -13  -3  103.19   17.30 
 -13  13   3   65.79   12.50 
 -12 -13   3   53.59   14.00 
  12 -13  -3   50.29   12.20 
 -12  13   3   50.19   10.70 
 -11 -13   3   24.00    9.40 
  11 -13  -3   19.50    7.40 
 -11  13   3   27.80    7.70 
 -10 -13   3    9.60    6.40 
  10 -13  -3    8.10    4.80 
 -10  13   3    8.60    4.40 
   9 -13  -3  152.38   15.90 
  -9 -13   3  161.38   17.50 
  -9  13   3  117.39   12.40 
  -8 -13   3  189.38   18.80 
   8 -13  -3  198.98   17.60 
  -8  13   3  181.68   14.80 
   7 -13  -3    5.50    4.10 
  -7 -13   3    3.60    4.10 
  -7  13   3    9.10    4.10 
   6 -13  -3   21.80    6.60 
  -6 -13   3   13.80    5.90 
  -6  13   3   20.60    5.90 
   6  13  -3   17.70    5.90 
   5 -13  -3  378.66   23.40 
  -5 -13   3  391.96   25.00 
  -5  13   3  386.66   21.00 
   5  13  -3  369.06   22.30 
   4 -13  -3    9.10    3.70 
  -4 -13   3    2.80    1.50 
   4 -13  -3    2.20    3.50 
  -4 -13   3    8.80    4.70 
   4  13  -3    2.10    3.80 
   4  13  -3    4.60    2.00 
   4  13  -3    4.00    3.50 
  -4  13   3    4.80    3.00 
  -3 -13   3  243.78   11.70 
  -3 -13   3  234.68   17.80 
   3 -13  -3  220.18   15.60 
   3 -13  -3  256.57   17.60 
   3  13  -3  249.88   11.90 
  -3  13   3  227.78   14.90 
   3  13  -3  257.57   16.80 
  -3  13   3  232.58   15.30 
   3  13  -3  255.17   18.40 
  -2 -13   3  156.78    9.60 
   2 -13  -3  145.49   12.50 
   2 -13  -3  183.08   14.40 
   2  13  -3  184.48   15.20 
  -2  13   3  154.58   12.00 
   2  13  -3  184.18   13.60 
  -2  13   3  153.98   12.30 
   2  13  -3  174.68   10.60 
  -1 -13   3  300.07   15.00 
   1 -13  -3  275.07   17.40 
  -1 -13   3  306.07   18.20 
   1  13  -3  312.17   18.30 
   1  13  -3  291.87   19.80 
  -1  13   3  323.57   18.10 
   1  13  -3  308.37   15.70 
  -1  13   3  306.17   20.20 
  -1  13   3  329.77   18.50 
   0 -13   3    1.70    2.80 
   0 -13  -3    0.90    1.90 
   0 -13   3    3.20    2.10 
   0 -13  -3   -1.00    2.20 
   0  13   3    0.10    2.80 
   0  13  -3    0.70    2.20 
   0  13  -3   10.40    3.80 
   0  13   3   -2.10    1.40 
   0  13  -3    7.90    3.20 
   0  13   3    1.30    2.40 
   1 -13   3  143.59   11.90 
   1 -13   3  145.69   10.90 
  -1 -13  -3  159.48   12.50 
   1  13   3  149.69   11.20 
  -1  13  -3  140.69   17.50 
   1  13   3  138.99   12.00 
   1  13   3  132.79   13.20 
  -1  13  -3  162.28   12.30 
   2 -13   3  141.59   11.30 
  -2 -13  -3  135.99   13.50 
  -2 -13  -3  141.29   11.60 
   2 -13   3  136.69   11.80 
   2  13   3  145.29   12.30 
   2  13   3  154.08   11.80 
  -2  13  -3  127.59   11.60 
  -2  13  -3  126.79   11.00 
   2  13   3  133.69   12.50 
   3 -13   3  238.28   15.60 
  -3 -13  -3  251.17   15.40 
  -3 -13  -3  236.78   18.70 
  -3  13  -3  226.58   15.50 
   3  13   3  242.68   15.00 
   3  13   3  237.78   14.90 
   3  13   3  242.98   17.40 
   4 -13   3  114.19   11.20 
  -4 -13  -3  125.49   13.60 
  -4  13  -3   95.79   10.10 
   4  13   3  101.09    9.10 
   4  13   3  111.79   10.30 
   4  13   3  113.49   11.90 
  -5 -13  -3   85.19   13.50 
   5 -13   3   97.19   10.80 
   5  13   3   79.49    8.80 
  -5  13  -3   88.19    9.80 
   5  13   3   92.29   11.40 
   5  13   3   96.09    8.90 
   5  13   3   96.29    8.90 
  -6 -13  -3   68.39   12.00 
   6 -13   3   51.89    9.20 
  -6  13  -3   73.89    9.00 
   6  13   3   62.79    7.10 
   6  13   3   66.29    8.20 
   7 -13   3   32.70    7.30 
  -7 -13  -3   31.90    8.50 
  -7  13  -3   29.50    6.60 
   7  13   3   32.60    7.40 
   7  13   3   33.50    7.40 
   8 -13   3  305.37   22.00 
  -8  13  -3  329.57   26.40 
   8  13   3  296.27   17.10 
   8  13   3  279.37   17.90 
   9 -13   3    6.30    4.50 
  -9 -13  -3   12.70    7.10 
  -9  13  -3   14.80    5.30 
   9  13   3   15.80    5.30 
   9  13   3   13.10    5.30 
  10 -13   3    3.10    4.50 
 -10 -13  -3   -3.30    5.70 
  10  13   3   -0.50    4.30 
 -10  13  -3    8.00    4.50 
  10  13   3    9.10    4.30 
 -11 -13  -3    9.70    8.10 
  11 -13   3   16.80    6.90 
 -11  13  -3   21.90    7.40 
  11  13   3   17.40    6.00 
  12 -13   3    8.80    6.30 
  12  13   3   16.60    5.10 
  14 -14  -3   15.00    6.80 
 -14 -14   3   22.00    9.90 
 -14  14   3    7.90    5.60 
 -13 -14   3   29.40   10.90 
  13 -14  -3   29.00    8.80 
 -13  14   3   15.00    7.20 
  12 -14  -3   26.60    8.70 
 -12 -14   3   19.80    8.60 
 -12  14   3   36.80    9.10 
 -11 -14   3   72.89   15.60 
  11 -14  -3   88.89   15.20 
 -11  14   3   97.79   12.60 
 -10 -14   3   20.50    8.00 
  10 -14  -3   17.60    7.60 
 -10  14   3   28.70    8.40 
   9 -14  -3   10.00    4.80 
  -9 -14   3   11.40    6.60 
  -9  14   3   15.80    5.80 
   8 -14  -3   63.29   11.30 
  -8 -14   3   65.49   12.20 
  -8  14   3   97.89   11.20 
   7 -14  -3   10.80    5.20 
  -7 -14   3    7.50    5.50 
  -7  14   3   12.80    4.80 
   6 -14  -3  260.57   20.30 
  -6 -14   3  298.97   22.60 
   6  14  -3  276.87   19.90 
  -6  14   3  294.17   19.10 
  -5 -14   3   86.89   13.70 
  -5 -14   3  102.99    5.00 
   5 -14  -3  114.79   12.50 
  -5  14   3   93.89   10.00 
   5  14  -3  110.49    4.90 
   5  14  -3  106.69   11.60 
   4 -14  -3    9.00    4.00 
  -4 -14   3   18.40    3.20 
  -4 -14   3   33.10    8.20 
   4  14  -3   15.40    3.80 
   4  14  -3   27.20    6.40 
  -4  14   3   24.40    6.10 
   3 -14  -3   26.60    6.50 
  -3 -14   3   18.00    3.60 
   3  14  -3   18.90    3.70 
  -3  14   3   33.20    6.70 
   3  14  -3   15.10    4.90 
  -2 -14   3  100.89    7.90 
   2 -14  -3  110.09   11.40 
   2 -14  -3  106.09   10.50 
  -2  14   3   90.29   10.60 
  -2  14   3  100.99    9.50 
   2  14  -3   98.19   11.70 
   2  14  -3  107.69    8.70 
   2  14  -3  105.39   10.60 
  -2  14   3  119.29   11.00 
   1 -14  -3   18.80    5.30 
  -1 -14   3   24.60    5.70 
  -1 -14   3   26.00    4.90 
   1 -14  -3   26.40    6.30 
  -1  14   3   26.50    7.10 
   1  14  -3   20.00    4.90 
   1  14  -3   17.40    5.30 
  -1  14   3   24.20    5.10 
  -1  14   3   24.80    5.80 
   1  14  -3   25.50    6.50 
   0 -14  -3   18.00    5.90 
   0 -14   3   32.80    5.60 
   0 -14   3   30.90    6.10 
   0 -14  -3   28.50    5.90 
   0  14  -3   30.50    6.10 
   0  14   3   30.90    6.00 
   0  14   3   21.00    5.20 
   0  14   3   44.70    8.80 
   0  14  -3   29.30    6.30 
   0  14  -3   30.90    7.50 
   1 -14   3  251.57   18.30 
  -1 -14  -3  274.47   17.10 
   1 -14   3  266.07   15.70 
   1  14   3  244.78   18.90 
   1  14   3  269.67   19.40 
  -1  14  -3  269.07   16.50 
   1  14   3  280.57   18.00 
  -1  14  -3  281.37   17.40 
   2 -14   3   84.29    8.80 
  -2 -14  -3   93.39    9.50 
  -2  14  -3   65.59    9.00 
   2  14   3   80.99   11.70 
  -2  14  -3   73.39    8.60 
   2  14   3   78.29    8.40 
   3 -14   3   29.30    6.40 
  -3 -14  -3   25.80    5.30 
  -3 -14  -3   29.70    8.10 
  -3  14  -3   30.80    6.70 
   3  14   3   26.80    5.90 
   3  14   3   26.00    5.30 
   3  14   3   23.70    6.90 
  -4 -14  -3   36.00    9.10 
   4 -14   3   55.09    9.50 
  -4  14  -3   62.19    9.40 
   4  14   3   51.39    9.40 
   4  14   3   62.09    7.60 
   4  14   3   50.39    6.80 
   5 -14   3   10.50    4.80 
  -5 -14  -3   15.70    6.10 
   5  14   3    6.80    3.40 
  -5  14  -3   13.10    5.00 
   5  14   3   18.00    5.60 
   5  14   3   18.50    4.50 
  -6 -14  -3    4.50    4.60 
   6 -14   3    1.40    3.50 
   6  14   3   13.80    3.80 
   6  14   3    5.90    3.10 
   6  14   3    7.80    4.80 
  -6  14  -3    5.70    4.00 
   7 -14   3    4.00    3.40 
  -7 -14  -3   -4.00    3.70 
  -7  14  -3    2.60    3.40 
   8 -14   3   34.30    7.80 
  -8 -14  -3   19.60    7.10 
  -8  14  -3   26.50    7.00 
   8  14   3   19.40    5.10 
   8  14   3   24.50    5.80 
  -9 -14  -3  308.07   27.50 
   9 -14   3  348.97   24.60 
   9  14   3  333.57   18.80 
   9  14   3  331.37   20.10 
  -9  14  -3  343.87   23.40 
 -10 -14  -3   73.09   15.20 
  10 -14   3   50.09   10.60 
 -10  14  -3   60.59   12.00 
  10  14   3   74.59    9.10 
 -11 -14  -3   24.40   10.40 
  11 -14   3   12.80    6.10 
 -11  14  -3   14.80    6.50 
  11  14   3   13.80    5.80 
 -12 -14  -3    4.50    9.00 
  12 -14   3   -2.30    5.50 
  12  14   3   -2.20    4.20 
 -12  14  -3   -2.70    5.30 
  14 -15  -3   -8.30    4.70 
 -14 -15   3    3.90    8.80 
 -14  15   3    2.30    5.00 
 -13 -15   3   90.59   17.50 
  13 -15  -3   64.89   16.80 
 -13  15   3   84.59   14.40 
  12 -15  -3  662.63   40.80 
 -12 -15   3  682.93   44.50 
 -12  15   3  696.73   38.20 
 -11 -15   3  553.34   38.20 
  11 -15  -3  571.84   36.10 
 -11  15   3  561.54   32.60 
  10 -15  -3  192.48   19.80 
 -10 -15   3  175.78   19.60 
 -10  15   3  171.68   16.50 
  -9 -15   3   72.59   13.60 
   9 -15  -3   95.79   15.00 
  -9  15   3   68.29   11.10 
   8 -15  -3   38.00   10.50 
  -8 -15   3   44.00   10.80 
  -8  15   3   39.20    8.30 
   7 -15  -3  110.49   13.40 
  -7 -15   3  114.59   14.40 
  -7  15   3   89.69   11.00 
   7  15  -3  105.89   12.80 
   6 -15  -3   29.40    8.30 
  -6 -15   3   25.40    8.30 
   6  15  -3   38.40    8.50 
  -6  15   3   40.90    7.70 
   5 -15  -3   93.59   11.50 
  -5 -15   3   83.59   13.70 
   5  15  -3   88.89    5.20 
   5  15  -3  107.59   12.20 
  -5  15   3   84.09    9.80 
   4 -15  -3   12.60    5.50 
  -4 -15   3    2.00    3.70 
  -4 -15   3    9.30    2.50 
   4  15  -3    9.30    3.10 
  -4  15   3   11.40    4.20 
   4  15  -3   12.10    4.40 
  -3 -15   3  306.47   15.00 
   3 -15  -3  335.37   21.60 
   3  15  -3  315.97   20.40 
   3  15  -3  332.17   15.40 
  -3  15   3  339.47   20.00 
   2 -15  -3 1243.58   48.50 
  -2 -15   3 1240.18   40.70 
  -2  15   3 1218.18   46.20 
   2  15  -3 1226.18   47.00 
   2  15  -3 1228.38   40.50 
  -2  15   3 1036.80   49.99 
   1 -15  -3 1965.20   68.89 
  -1 -15   3 2078.09   62.49 
   1  15  -3 2054.99   68.39 
  -1  15   3 1909.01   64.69 
   1  15  -3 1955.20   62.49 
  -1  15   3 2060.69   68.19 
   0 -15   3  660.33   28.10 
   0 -15  -3  691.73   31.80 
   0  15   3  650.43   29.00 
   0  15  -3  661.33   30.80 
   0  15   3  695.23   31.70 
   1 -15   3   29.20    5.60 
  -1 -15  -3   21.50    5.70 
  -1  15  -3   26.40    6.10 
  -1  15  -3   14.00    5.10 
   1  15   3   21.80    4.90 
   1  15   3   19.50    6.00 
   2 -15   3   21.30    5.20 
  -2  15  -3    7.70    4.00 
   2  15   3   10.40    4.00 
   2  15   3    5.80    3.50 
  -3 -15  -3  504.45   24.80 
  -3 -15  -3  514.05   30.30 
   3 -15   3  504.25   25.60 
   3  15   3  528.05   29.20 
   3  15   3  508.15   27.90 
  -3  15  -3  485.15   25.40 
  -4 -15  -3  490.85   24.10 
  -4 -15  -3  490.05   30.70 
   4 -15   3  554.44   27.50 
   4  15   3  521.95   24.80 
   4  15   3  547.35   29.70 
  -4  15  -3  531.15   27.00 
   4  15   3  532.85   26.40 
   5 -15   3  175.68   15.00 
  -5 -15  -3  144.49   16.80 
   5  15   3  135.89   12.50 
   5  15   3  145.39   15.00 
  -5  15  -3  140.09   13.00 
  -6 -15  -3    2.30    4.90 
   6 -15   3    0.20    2.80 
   6  15   3   -1.90    2.20 
  -6  15  -3    4.30    3.70 
   7 -15   3  141.69   14.40 
  -7 -15  -3  156.68   26.20 
   7  15   3  173.08   12.20 
   7  15   3  169.78   14.00 
   7  15   3  162.28   18.00 
  -7  15  -3  179.98   15.90 
   8 -15   3   -0.50    3.10 
  -8 -15  -3   -1.00    4.10 
  -8  15  -3   -3.30    3.20 
   8  15   3    0.10    3.30 
   8  15   3    3.10    3.20 
   9 -15   3  125.99   14.90 
  -9 -15  -3   98.09   17.10 
  -9  15  -3  102.19   13.60 
   9  15   3  109.49   10.70 
   9  15   3   98.59   11.40 
  10 -15   3  102.49   13.90 
 -10 -15  -3   96.19   17.80 
 -10  15  -3   81.29   13.60 
  10  15   3   93.69   10.10 
  11 -15   3   27.70    8.20 
 -11 -15  -3   16.40    9.50 
  11  15   3   17.30    5.90 
 -11  15  -3   31.40    8.60 
  12 -15   3   11.10    6.40 
 -12 -15  -3    6.60    8.90 
 -12  15  -3    2.00    6.10 
 -13 -16   3   12.50    8.80 
  13 -16  -3   13.90    7.00 
 -13  16   3   15.00    6.40 
 -12 -16   3   36.60   10.70 
  12 -16  -3   18.60    7.70 
 -12  16   3   39.30    9.10 
 -11 -16   3  180.48   20.90 
  11 -16  -3  129.89   17.10 
 -11  16   3  156.18   16.60 
  10 -16  -3  159.38   18.20 
 -10 -16   3  142.09   17.60 
 -10  16   3  137.19   14.50 
  -9 -16   3   -4.60    4.40 
   9 -16  -3    1.80    4.40 
  -9  16   3   10.40    4.40 
  -8 -16   3  222.28   21.40 
   8 -16  -3  263.87   22.20 
  -8  16   3  254.97   19.60 
   8  16  -3  266.17   21.80 
  -7 -16   3 1941.81   78.19 
   7 -16  -3 2007.00   76.09 
  -7  16   3 1951.70   69.99 
   7  16  -3 2156.38   76.09 
  -6 -16   3 2649.53   95.29 
   6 -16  -3 2802.22   93.29 
  -6  16   3 2623.54   86.59 
   6  16  -3 2588.54   90.29 
   5 -16  -3 3852.51  121.39 
  -5 -16   3 3659.13  122.89 
  -5 -16   3 3655.03  101.39 
   5  16  -3 3804.72  119.19 
   5  16  -3 3981.60  101.19 
  -5  16   3 3820.22  115.59 
   4 -16  -3  251.47   19.30 
  -4 -16   3  202.08   11.30 
   4  16  -3  198.68   11.00 
   4  16  -3  223.08   17.40 
  -4  16   3  226.88   16.50 
   3 -16  -3   52.29    9.70 
  -3 -16   3   59.79    6.30 
  -3  16   3   71.99    8.50 
   3  16  -3   72.29    7.50 
   3  16  -3   59.39   10.20 
   2 -16  -3  884.91   39.90 
  -2 -16   3  917.31   33.50 
   2  16  -3  914.71   33.20 
   2  16  -3  924.31   39.60 
  -2  16   3  857.31   37.90 
  -1 -16   3  442.26   20.90 
   1 -16  -3  451.25   25.50 
  -1  16   3  470.95   25.50 
   1  16  -3  415.96   21.10 
   1  16  -3  442.46   25.00 
   0 -16   3  171.48   12.80 
   0 -16  -3  165.48   14.40 
   0  16  -3  169.78   13.10 
   0  16   3  173.68   13.30 
   0  16  -3  154.38   13.80 
   0  16   3  195.68   15.70 
   1 -16   3   36.40    6.60 
  -1 -16  -3   44.90    8.10 
   1  16   3   43.50    8.40 
  -1  16  -3   35.20    7.70 
   1  16   3   36.20    6.50 
  -1  16  -3   39.70    7.80 
   2 -16   3  107.49   10.30 
  -2 -16  -3  116.79   11.10 
   2  16   3  106.59   10.00 
  -2  16  -3  113.99   11.40 
   2  16   3  122.69   12.50 
   3 -16   3   39.70    7.80 
  -3 -16  -3   32.60    6.90 
   3  16   3   25.50    5.70 
   3  16   3   41.80    9.00 
  -3  16  -3   32.90    7.10 
   3  16   3   31.00    6.10 
   4 -16   3 1518.75   54.89 
  -4 -16  -3 1411.06   60.09 
  -4 -16  -3 1354.56   55.69 
  -4  16  -3 1454.75   53.89 
   4  16   3 1341.87   55.89 
   4  16   3 1431.76   50.39 
   4  16   3 1458.05   50.39 
   5 -16   3 1590.94   59.69 
  -5 -16  -3 1617.44   66.79 
   5  16   3 1580.14   62.89 
  -5  16  -3 1617.64   58.89 
   5  16   3 1559.84   54.89 
   6 -16   3  196.58   17.10
[truncated: 845,058 more chars]
