# Supplementary material for: Controllable catalytic difluorocarbene transfer enables access to diversified fluoroalkylated arenes
Source: Springer Nature journal article supplement (doi:10.1038/s41557-019-0331-9), 2019-09-23
Supplement: 41557_2019_331_MOESM131_ESM.mol [file 41557_2019_331_MOESM131_ESM.mol]

nchem.19030518B-comp B1-1.mol
  ChemDraw07301920142D

 46 49  0  0  1  0  0  0  0  0999 V2000
   -2.0560    1.5356    0.0000 C   0  0  0  0  0  0  0  0  0  0  0  0
   -2.0560    0.7106    0.0000 C   0  0  0  0  0  0  0  0  0  0  0  0
   -1.3415    0.2981    0.0000 O   0  0  0  0  0  0  0  0  0  0  0  0
   -0.6270    0.7106    0.0000 C   0  0  0  0  0  0  0  0  0  0  0  0
   -0.6270    1.5356    0.0000 C   0  0  0  0  0  0  0  0  0  0  0  0
   -1.3415    1.9481    0.0000 C   0  0  0  0  0  0  0  0  0  0  0  0
    0.0874    0.2981    0.0000 C   0  0  0  0  0  0  0  0  0  0  0  0
    0.8019    0.7106    0.0000 C   0  0  0  0  0  0  0  0  0  0  0  0
    0.8019    1.5356    0.0000 C   0  0  0  0  0  0  0  0  0  0  0  0
    0.0874    1.9481    0.0000 C   0  0  0  0  0  0  0  0  0  0  0  0
   -2.7705    1.9481    0.0000 C   0  0  0  0  0  0  0  0  0  0  0  0
   -3.4849    1.5356    0.0000 C   0  0  0  0  0  0  0  0  0  0  0  0
   -3.4849    0.7106    0.0000 C   0  0  0  0  0  0  0  0  0  0  0  0
   -2.7705    0.2981    0.0000 C   0  0  0  0  0  0  0  0  0  0  0  0
   -0.9290    2.6626    0.0000 C   0  0  0  0  0  0  0  0  0  0  0  0
   -1.7540    2.6626    0.0000 C   0  0  0  0  0  0  0  0  0  0  0  0
   -2.7705   -0.5269    0.0000 P   0  0  0  0  0  0  0  0  0  0  0  0
    0.0874   -0.5269    0.0000 P   0  0  0  0  0  0  0  0  0  0  0  0
   -1.3454   -1.0132    0.0000 Pd  0  3  0  0  0  0  0  0  0  0  0  0
   -3.5900   -0.6218    0.0000 C   0  0  0  0  0  0  0  0  0  0  0  0
   -3.4951   -1.4407    0.0000 C   0  0  0  0  0  0  0  0  0  0  0  0
   -4.4089   -0.7167    0.0000 C   0  0  0  0  0  0  0  0  0  0  0  0
   -3.6848    0.1971    0.0000 C   0  0  0  0  0  0  0  0  0  0  0  0
   -3.0980   -1.2841    0.0000 C   0  0  0  0  0  0  0  0  0  0  0  0
   -2.3414   -1.6113    0.0000 C   0  0  0  0  0  0  0  0  0  0  0  0
   -3.4253   -2.0407    0.0000 C   0  0  0  0  0  0  0  0  0  0  0  0
   -3.8546   -0.9568    0.0000 C   0  0  0  0  0  0  0  0  0  0  0  0
    0.4447   -1.2705    0.0000 C   0  0  0  0  0  0  0  0  0  0  0  0
    1.1878   -0.9135    0.0000 C   0  0  0  0  0  0  0  0  0  0  0  0
    0.8017   -2.0135    0.0000 C   0  0  0  0  0  0  0  0  0  0  0  0
   -0.2983   -1.6275    0.0000 C   0  0  0  0  0  0  0  0  0  0  0  0
    0.9101   -0.5893    0.0000 C   0  0  0  0  0  0  0  0  0  0  0  0
    0.9724    0.2327    0.0000 C   0  0  0  0  0  0  0  0  0  0  0  0
    1.7321   -0.6516    0.0000 C   0  0  0  0  0  0  0  0  0  0  0  0
    0.8477   -1.4113    0.0000 C   0  0  0  0  0  0  0  0  0  0  0  0
   -1.3461   -1.8382    0.0000 C   0  0  0  0  0  0  0  0  0  0  0  0
   -2.1704   -1.8376    0.0000 F   0  0  0  0  0  0  0  0  0  0  0  0
   -1.3467   -2.6626    0.0000 F   0  0  0  0  0  0  0  0  0  0  0  0
   -0.5217   -1.8389    0.0000 F   0  0  0  0  0  0  0  0  0  0  0  0
    2.9799    0.5269    0.0000 C   0  0  0  0  0  0  0  0  0  0  0  0
    2.2654    0.9394    0.0000 F   0  0  0  0  0  0  0  0  0  0  0  0
    2.2654    0.1144    0.0000 F   0  0  0  0  0  0  0  0  0  0  0  0
    2.9799   -0.2981    0.0000 F   0  0  0  0  0  0  0  0  0  0  0  0
    3.6944    0.9394    0.0000 C   0  0  0  0  0  0  0  0  0  0  0  0
    3.6944    1.7644    0.0000 O   0  0  0  0  0  0  0  0  0  0  0  0
    4.4089    0.5269    0.0000 O   0  5  0  0  0  0  0  0  0  0  0  0
 20 21  1  0      
 20 22  1  0      
 20 23  1  0      
 17 20  1  0      
 24 25  1  0      
 24 26  1  0      
 24 27  1  0      
 17 24  1  0      
 28 29  1  0      
 28 30  1  0      
 28 31  1  0      
 18 28  1  0      
 32 33  1  0      
 32 34  1  0      
 32 35  1  0      
 18 32  1  0      
 36 37  1  0      
 36 38  1  0      
 36 39  1  0      
 19 36  1  0      
  1  2  2  0      
  2  3  1  0      
  3  4  1  0      
  4  5  2  0      
  5  6  1  0      
  6  1  1  0      
  4  7  1  0      
  7  8  2  0      
  8  9  1  0      
  9 10  2  0      
 10  5  1  0      
  1 11  1  0      
 11 12  2  0      
 12 13  1  0      
 13 14  2  0      
 14  2  1  0      
  6 15  1  0      
 16  6  1  0      
 14 17  1  0      
  7 18  1  0      
 17 19  1  0      
 19 18  1  0      
  3 19  1  6      
 44 45  2  0      
 44 46  1  0      
 40 41  1  0      
 40 42  1  0      
 40 43  1  0      
 40 44  1  0      
M  CHG  2  19   1  46  -1
M  STY  1   1 SUP
M  SLB  1   1   1
M  SAL   1  4  20  21  22  23
M  SBL   1  1   4
M  SMT   1 t-Bu
M  SBV   1   4    0.8195    0.0950
M  STY  1   2 SUP
M  SLB  1   2   2
M  SAL   2  4  24  25  26  27
M  SBL   2  1   8
M  SMT   2 t-Bu
M  SBV   2   8    0.3275    0.7572
M  STY  1   3 SUP
M  SLB  1   3   3
M  SAL   3  4  28  29  30  31
M  SBL   3  1  12
M  SMT   3 t-Bu
M  SBV   3  12   -0.3573    0.7436
M  STY  1   4 SUP
M  SLB  1   4   4
M  SAL   4  4  32  33  34  35
M  SBL   4  1  16
M  SMT   4 t-Bu
M  SBV   4  16   -0.8226    0.0624
M  STY  1   5 SUP
M  SLB  1   5   5
M  SAL   5  4  36  37  38  39
M  SBL   5  1  20
M  SMT   5 CF3
M  SBV   5  20    0.0007    0.8250
M  END
