# Supplementary material for: Controllable catalytic difluorocarbene transfer enables access to diversified fluoroalkylated arenes
Source: Springer Nature journal article supplement (doi:10.1038/s41557-019-0331-9), 2019-09-23
Supplement: 41557_2019_331_MOESM133_ESM.cif [file 41557_2019_331_MOESM133_ESM.cif]

 
data_mo_d8v19405_0m 
  
_audit_creation_method            SHELXL-2013 
_chemical_name_systematic 
; 
 ? 
; 
_chemical_name_common             ? 
_chemical_melting_point           ? 
_chemical_formula_moiety          ? 
_chemical_formula_sum 
 'C42 H64 F6 O3 P2 Pd' 
_chemical_formula_weight          899.27 
  
loop_ 
 _atom_type_symbol 
 _atom_type_description 
 _atom_type_scat_dispersion_real 
 _atom_type_scat_dispersion_imag 
 _atom_type_scat_source 
 'C'  'C'   0.0033   0.0016 
 'International Tables Vol C Tables 4.2.6.8 and 6.1.1.4' 
 'H'  'H'   0.0000   0.0000 
 'International Tables Vol C Tables 4.2.6.8 and 6.1.1.4' 
 'F'  'F'   0.0171   0.0103 
 'International Tables Vol C Tables 4.2.6.8 and 6.1.1.4' 
 'O'  'O'   0.0106   0.0060 
 'International Tables Vol C Tables 4.2.6.8 and 6.1.1.4' 
 'P'  'P'   0.1023   0.0942 
 'International Tables Vol C Tables 4.2.6.8 and 6.1.1.4' 
 'Pd'  'Pd'  -0.9988   1.0072 
 'International Tables Vol C Tables 4.2.6.8 and 6.1.1.4' 
  
_space_group_crystal_system       monoclinic 
_space_group_IT_number            14 
_space_group_name_H-M_alt         'P 21/c' 
_space_group_name_Hall            '-P 2ybc' 
  
_shelx_space_group_comment 
; 
The symmetry employed for this shelxl refinement is uniquely defined 
by the following loop, which should always be used as a source of 
symmetry information in preference to the above space-group names. 
They are only intended as comments. 
; 
  
loop_ 
 _space_group_symop_operation_xyz 
 'x, y, z' 
 '-x, y+1/2, -z+1/2' 
 '-x, -y, -z' 
 'x, -y-1/2, z-1/2' 
  
_cell_length_a                    12.3707(5) 
_cell_length_b                    20.2354(9) 
_cell_length_c                    17.5915(8) 
_cell_angle_alpha                 90 
_cell_angle_beta                  96.941(2) 
_cell_angle_gamma                 90 
_cell_volume                      4371.3(3) 
_cell_formula_units_Z             4 
_cell_measurement_temperature     193(2) 
_cell_measurement_reflns_used     9951 
_cell_measurement_theta_min       4.729 
_cell_measurement_theta_max       54.983 
  
_exptl_crystal_description        prismatic 
_exptl_crystal_colour             yellow 
_exptl_crystal_density_meas       ? 
_exptl_crystal_density_method     ? 
_exptl_crystal_density_diffrn     1.366 
_exptl_crystal_F_000              1880 
_exptl_transmission_factor_min    ? 
_exptl_transmission_factor_max    ? 
_exptl_crystal_size_max           0.160 
_exptl_crystal_size_mid           0.130 
_exptl_crystal_size_min           0.080 
_exptl_absorpt_coefficient_mu     0.559 
_shelx_estimated_absorpt_T_min    0.916 
_shelx_estimated_absorpt_T_max    0.957 
_exptl_absorpt_correction_type    multi-scan 
_exptl_absorpt_correction_T_min   0.6607 
_exptl_absorpt_correction_T_max   0.7456 
_exptl_absorpt_process_details    sadabs 
  
_exptl_special_details 
; 
 ? 
; 
  
_diffrn_ambient_temperature       193(2) 
_diffrn_radiation_wavelength      0.71073 
_diffrn_radiation_type            MoK\a 
_diffrn_source                    ? 
_diffrn_measurement_device_type   'Bruker APEX-II CCD' 
_diffrn_measurement_method        '\f and \w scans' 
_diffrn_detector_area_resol_mean  ? 
_diffrn_reflns_number             43001 
_diffrn_reflns_av_unetI/netI      0.0305 
_diffrn_reflns_av_R_equivalents   0.0360 
_diffrn_reflns_limit_h_min        -15 
_diffrn_reflns_limit_h_max        15 
_diffrn_reflns_limit_k_min        -24 
_diffrn_reflns_limit_k_max        24 
_diffrn_reflns_limit_l_min        -21 
_diffrn_reflns_limit_l_max        18 
_diffrn_reflns_theta_min          2.326 
_diffrn_reflns_theta_max          26.000 
_diffrn_reflns_theta_full         25.242 
_diffrn_measured_fraction_theta_max   0.999 
_diffrn_measured_fraction_theta_full  0.999 
_diffrn_reflns_Laue_measured_fraction_max    0.999 
_diffrn_reflns_Laue_measured_fraction_full   0.999 
_diffrn_reflns_point_group_measured_fraction_max   0.999 
_diffrn_reflns_point_group_measured_fraction_full  0.999 
_reflns_number_total              8577 
_reflns_number_gt                 7326 
_reflns_threshold_expression      'I > 2\s(I)' 
_reflns_Friedel_coverage          0.000 
_reflns_Friedel_fraction_max      . 
_reflns_Friedel_fraction_full     . 
  
_reflns_special_details 
; 
 Reflections were merged by SHELXL according to the crystal 
 class for the calculation of statistics and refinement. 
  
 _reflns_Friedel_fraction is defined as the number of unique 
 Friedel pairs measured divided by the number that would be 
 possible theoretically, ignoring centric projections and 
 systematic absences. 
; 
  
_computing_data_collection        'Bruker APEX2' 
_computing_cell_refinement        'Bruker SAINT' 
_computing_data_reduction         'Bruker SAINT' 
_computing_structure_solution     'SHELXS-97 (Sheldrick 2008)' 
_computing_structure_refinement   'SHELXL-2013 (Sheldrick, 2013)' 
_computing_molecular_graphics     'Bruker SHELXTL' 
_computing_publication_material   'Bruker SHELXTL' 
  
_refine_special_details 
; 
 ? 
; 
_refine_ls_structure_factor_coef  Fsqd 
_refine_ls_matrix_type            full 
_refine_ls_weighting_scheme       calc 
_refine_ls_weighting_details 
'w=1/[\s^2^(Fo^2^)+(0.0356P)^2^+7.0152P] where P=(Fo^2^+2Fc^2^)/3' 
_atom_sites_solution_primary      ? 
_atom_sites_solution_secondary    ? 
_atom_sites_solution_hydrogens    geom 
_refine_ls_hydrogen_treatment     constr 
_refine_ls_extinction_method      SHELXL 
_refine_ls_extinction_coef        0.00174(16) 
_refine_ls_extinction_expression 
 'Fc^*^=kFc[1+0.001xFc^2^\l^3^/sin(2\q)]^-1/4^' 
_refine_ls_number_reflns          8577 
_refine_ls_number_parameters      575 
_refine_ls_number_restraints      74 
_refine_ls_R_factor_all           0.0504 
_refine_ls_R_factor_gt            0.0404 
_refine_ls_wR_factor_ref          0.0979 
_refine_ls_wR_factor_gt           0.0907 
_refine_ls_goodness_of_fit_ref    1.064 
_refine_ls_restrained_S_all       1.102 
_refine_ls_shift/su_max           0.006 
_refine_ls_shift/su_mean          0.000 
  
loop_ 
 _atom_site_label 
 _atom_site_type_symbol 
 _atom_site_fract_x 
 _atom_site_fract_y 
 _atom_site_fract_z 
 _atom_site_U_iso_or_equiv 
 _atom_site_adp_type 
 _atom_site_occupancy 
 _atom_site_site_symmetry_order 
 _atom_site_calc_flag 
 _atom_site_refinement_flags_posn 
 _atom_site_refinement_flags_adp 
 _atom_site_refinement_flags_occupancy 
 _atom_site_disorder_assembly 
 _atom_site_disorder_group 
Pd1 Pd 0.33686(2) 0.57104(2) 0.68544(2) 0.02446(8) Uani 1 1 d . . . . . 
P1 P 0.27336(6) 0.49029(4) 0.76480(4) 0.02387(16) Uani 1 1 d . . . . . 
P2 P 0.35767(6) 0.65536(4) 0.59514(5) 0.02656(17) Uani 1 1 d . . . . . 
F1 F 0.52014(16) 0.51115(13) 0.77196(13) 0.0623(6) Uani 1 1 d . . . . . 
F2 F 0.52693(19) 0.50734(14) 0.65356(15) 0.0721(7) Uani 1 1 d . . . . . 
F3 F 0.56214(18) 0.59703(14) 0.7137(2) 0.0901(10) Uani 1 1 d . . . . . 
O1 O 0.16712(15) 0.59660(9) 0.66205(11) 0.0248(4) Uani 1 1 d . . . . . 
C1 C 0.0888(2) 0.56147(14) 0.69833(16) 0.0242(6) Uani 1 1 d . . . . . 
C2 C 0.1285(2) 0.51246(14) 0.75002(16) 0.0265(6) Uani 1 1 d . . . . . 
C3 C 0.0530(2) 0.47555(16) 0.78445(18) 0.0327(7) Uani 1 1 d . . . . . 
H3 H 0.0788 0.4415 0.8192 0.039 Uiso 1 1 calc R U . . . 
C4 C -0.0581(2) 0.48632(17) 0.77019(18) 0.0357(7) Uani 1 1 d . . . . . 
C5 C -0.0920(2) 0.53672(17) 0.71963(18) 0.0350(7) Uani 1 1 d . . . . . 
H5 H -0.1678 0.5458 0.7101 0.042 Uiso 1 1 calc R U . . . 
C6 C -0.0214(2) 0.57480(14) 0.68203(16) 0.0266(6) Uani 1 1 d . . . . . 
C7 C -0.0681(2) 0.62577(15) 0.62336(16) 0.0274(6) Uani 1 1 d . . . . . 
C8 C 0.0224(2) 0.65777(14) 0.58519(16) 0.0265(6) Uani 1 1 d . . . . . 
C9 C -0.0047(2) 0.70362(15) 0.52674(17) 0.0308(7) Uani 1 1 d . . . . . 
H9 H -0.0794 0.7141 0.5129 0.037 Uiso 1 1 calc R U . . . 
C10 C 0.0720(3) 0.73461(15) 0.48797(18) 0.0329(7) Uani 1 1 d . . . . . 
C11 C 0.1805(2) 0.71986(15) 0.51149(18) 0.0320(7) Uani 1 1 d . . . . . 
H11 H 0.2348 0.7416 0.4870 0.038 Uiso 1 1 calc R U . . . 
C12 C 0.2133(2) 0.67459(14) 0.56944(17) 0.0264(6) Uani 1 1 d . . . . . 
C13 C 0.1322(2) 0.64361(13) 0.60487(16) 0.0239(6) Uani 1 1 d . . . . . 
C14 C -0.1301(3) 0.67975(18) 0.6621(2) 0.0436(8) Uani 1 1 d . . . . . 
H14A H -0.0790 0.7045 0.6983 0.065 Uiso 1 1 calc R U . . . 
H14B H -0.1858 0.6592 0.6894 0.065 Uiso 1 1 calc R U . . . 
H14C H -0.1651 0.7099 0.6230 0.065 Uiso 1 1 calc R U . . . 
C15 C -0.1473(3) 0.59073(17) 0.56178(19) 0.0389(8) Uani 1 1 d . . . . . 
H15A H -0.1816 0.6235 0.5256 0.058 Uiso 1 1 calc R U . . . 
H15B H -0.2035 0.5677 0.5863 0.058 Uiso 1 1 calc R U . . . 
H15C H -0.1070 0.5587 0.5342 0.058 Uiso 1 1 calc R U . . . 
C16 C -0.1392(3) 0.4437(2) 0.8082(2) 0.0524(10) Uani 1 1 d D . . . . 
C17 C -0.2366(5) 0.4263(4) 0.7501(4) 0.154(4) Uani 1 1 d . . . . . 
H17A H -0.2803 0.4661 0.7374 0.230 Uiso 1 1 calc R U . . . 
H17B H -0.2813 0.3930 0.7720 0.230 Uiso 1 1 calc R U . . . 
H17C H -0.2109 0.4088 0.7036 0.230 Uiso 1 1 calc R U . . . 
C18 C -0.2000(9) 0.4835(6) 0.8588(6) 0.097(4) Uani 0.6 1 d D U P A 1 
H18A H -0.2517 0.4552 0.8817 0.146 Uiso 0.6 1 calc R U P A 1 
H18B H -0.2398 0.5187 0.8290 0.146 Uiso 0.6 1 calc R U P A 1 
H18C H -0.1490 0.5032 0.8995 0.146 Uiso 0.6 1 calc R U P A 1 
C18' C -0.1263(12) 0.4689(8) 0.8946(7) 0.091(4) Uani 0.4 1 d D U P A 2 
H18D H -0.1692 0.4406 0.9249 0.136 Uiso 0.4 1 calc R U P A 2 
H18E H -0.1524 0.5146 0.8962 0.136 Uiso 0.4 1 calc R U P A 2 
H18F H -0.0495 0.4670 0.9160 0.136 Uiso 0.4 1 calc R U P A 2 
C19 C -0.0929(4) 0.3763(3) 0.8303(4) 0.103(2) Uani 1 1 d . . . . . 
H19A H -0.0637 0.3563 0.7863 0.155 Uiso 1 1 calc R U . . . 
H19B H -0.1505 0.3480 0.8462 0.155 Uiso 1 1 calc R U . . . 
H19C H -0.0344 0.3809 0.8728 0.155 Uiso 1 1 calc R U . . . 
C20 C 0.0391(3) 0.78224(17) 0.4217(2) 0.0455(9) Uani 1 1 d D . . . . 
C21 C 0.1311(8) 0.8095(5) 0.3855(6) 0.082(3) Uani 0.6 1 d D U P B 1 
H21A H 0.1814 0.8322 0.4242 0.124 Uiso 0.6 1 calc R U P B 1 
H21B H 0.1035 0.8409 0.3453 0.124 Uiso 0.6 1 calc R U P B 1 
H21C H 0.1694 0.7734 0.3629 0.124 Uiso 0.6 1 calc R U P B 1 
C22 C -0.0447(8) 0.7444(4) 0.3655(5) 0.051(2) Uani 0.6 1 d D U P B 1 
H22A H -0.0726 0.7737 0.3232 0.076 Uiso 0.6 1 calc R U P B 1 
H22B H -0.1050 0.7295 0.3925 0.076 Uiso 0.6 1 calc R U P B 1 
H22C H -0.0094 0.7060 0.3450 0.076 Uiso 0.6 1 calc R U P B 1 
C23 C -0.0200(7) 0.8433(3) 0.4548(4) 0.070(2) Uani 0.6 1 d D U P B 1 
H23A H 0.0283 0.8632 0.4969 0.106 Uiso 0.6 1 calc R U P B 1 
H23B H -0.0871 0.8284 0.4738 0.106 Uiso 0.6 1 calc R U P B 1 
H23C H -0.0377 0.8761 0.4142 0.106 Uiso 0.6 1 calc R U P B 1 
C21' C 0.1226(13) 0.7740(7) 0.3589(8) 0.080(3) Uani 0.4 1 d D U P B 2 
H21D H 0.1055 0.8067 0.3181 0.121 Uiso 0.4 1 calc R U P B 2 
H21E H 0.1159 0.7295 0.3371 0.121 Uiso 0.4 1 calc R U P B 2 
H21F H 0.1972 0.7810 0.3833 0.121 Uiso 0.4 1 calc R U P B 2 
C22' C -0.0687(12) 0.7717(8) 0.3780(10) 0.070(3) Uani 0.4 1 d D U P B 2 
H22D H -0.1105 0.7407 0.4056 0.105 Uiso 0.4 1 calc R U P B 2 
H22E H -0.0597 0.7536 0.3275 0.105 Uiso 0.4 1 calc R U P B 2 
H22F H -0.1075 0.8140 0.3718 0.105 Uiso 0.4 1 calc R U P B 2 
C23' C 0.0727(14) 0.8514(6) 0.4449(8) 0.091(3) Uani 0.4 1 d D U P B 2 
H23D H 0.0840 0.8771 0.3993 0.136 Uiso 0.4 1 calc R U P B 2 
H23E H 0.1406 0.8501 0.4799 0.136 Uiso 0.4 1 calc R U P B 2 
H23F H 0.0155 0.8721 0.4707 0.136 Uiso 0.4 1 calc R U P B 2 
C24 C 0.3184(3) 0.49667(16) 0.87172(17) 0.0327(7) Uani 1 1 d . . . . . 
C25 C 0.2292(3) 0.4818(2) 0.92252(19) 0.0462(9) Uani 1 1 d . . . . . 
H25A H 0.1674 0.5116 0.9090 0.069 Uiso 1 1 calc R U . . . 
H25B H 0.2581 0.4883 0.9764 0.069 Uiso 1 1 calc R U . . . 
H25C H 0.2051 0.4359 0.9147 0.069 Uiso 1 1 calc R U . . . 
C26 C 0.4140(3) 0.45011(18) 0.89825(19) 0.0426(8) Uani 1 1 d . . . . . 
H26A H 0.3897 0.4041 0.8919 0.064 Uiso 1 1 calc R U . . . 
H26B H 0.4395 0.4585 0.9523 0.064 Uiso 1 1 calc R U . . . 
H26C H 0.4736 0.4580 0.8674 0.064 Uiso 1 1 calc R U . . . 
C27 C 0.3538(3) 0.56910(17) 0.8841(2) 0.0490(9) Uani 1 1 d . . . . . 
H27A H 0.4187 0.5774 0.8586 0.073 Uiso 1 1 calc R U . . . 
H27B H 0.3706 0.5778 0.9391 0.073 Uiso 1 1 calc R U . . . 
H27C H 0.2947 0.5983 0.8625 0.073 Uiso 1 1 calc R U . . . 
C28 C 0.2753(3) 0.40446(15) 0.72352(17) 0.0307(7) Uani 1 1 d . . . . . 
C29 C 0.2144(3) 0.40950(17) 0.64232(19) 0.0466(9) Uani 1 1 d . . . . . 
H29A H 0.1371 0.4181 0.6454 0.070 Uiso 1 1 calc R U . . . 
H29B H 0.2221 0.3679 0.6150 0.070 Uiso 1 1 calc R U . . . 
H29C H 0.2451 0.4457 0.6148 0.070 Uiso 1 1 calc R U . . . 
C30 C 0.2223(3) 0.35142(15) 0.76875(18) 0.0363(7) Uani 1 1 d . . . . . 
H30A H 0.2558 0.3519 0.8221 0.054 Uiso 1 1 calc R U . . . 
H30B H 0.2328 0.3079 0.7463 0.054 Uiso 1 1 calc R U . . . 
H30C H 0.1442 0.3605 0.7668 0.054 Uiso 1 1 calc R U . . . 
C31 C 0.3929(3) 0.38365(17) 0.7159(2) 0.0445(8) Uani 1 1 d . . . . . 
H31A H 0.4256 0.4154 0.6833 0.067 Uiso 1 1 calc R U . . . 
H31B H 0.3929 0.3396 0.6928 0.067 Uiso 1 1 calc R U . . . 
H31C H 0.4353 0.3827 0.7667 0.067 Uiso 1 1 calc R U . . . 
C32 C 0.4052(3) 0.62600(17) 0.5027(2) 0.0420(8) Uani 1 1 d . . . . . 
C33 C 0.3368(4) 0.5640(2) 0.4825(3) 0.0656(12) Uani 1 1 d . . . . . 
H33A H 0.3492 0.5321 0.5246 0.098 Uiso 1 1 calc R U . . . 
H33B H 0.3580 0.5442 0.4356 0.098 Uiso 1 1 calc R U . . . 
H33C H 0.2595 0.5760 0.4743 0.098 Uiso 1 1 calc R U . . . 
C34 C 0.5261(3) 0.6075(2) 0.5151(3) 0.0648(12) Uani 1 1 d . . . . . 
H34A H 0.5701 0.6476 0.5240 0.097 Uiso 1 1 calc R U . . . 
H34B H 0.5458 0.5847 0.4696 0.097 Uiso 1 1 calc R U . . . 
H34C H 0.5398 0.5782 0.5597 0.097 Uiso 1 1 calc R U . . . 
C35 C 0.3909(4) 0.6741(2) 0.4358(2) 0.0691(13) Uani 1 1 d . . . . . 
H35A H 0.3131 0.6813 0.4200 0.104 Uiso 1 1 calc R U . . . 
H35B H 0.4246 0.6557 0.3928 0.104 Uiso 1 1 calc R U . . . 
H35C H 0.4257 0.7163 0.4514 0.104 Uiso 1 1 calc R U . . . 
C36 C 0.4202(3) 0.73454(16) 0.6361(2) 0.0383(8) Uani 1 1 d . . . . . 
C37 C 0.3849(3) 0.73866(19) 0.7160(2) 0.0558(10) Uani 1 1 d . . . . . 
H37A H 0.3052 0.7379 0.7122 0.084 Uiso 1 1 calc R U . . . 
H37B H 0.4121 0.7798 0.7407 0.084 Uiso 1 1 calc R U . . . 
H37C H 0.4146 0.7009 0.7466 0.084 Uiso 1 1 calc R U . . . 
C38 C 0.5450(3) 0.7324(2) 0.6397(3) 0.0656(13) Uani 1 1 d . . . . . 
H38A H 0.5722 0.6908 0.6633 0.098 Uiso 1 1 calc R U . . . 
H38B H 0.5767 0.7696 0.6702 0.098 Uiso 1 1 calc R U . . . 
H38C H 0.5656 0.7353 0.5877 0.098 Uiso 1 1 calc R U . . . 
C39 C 0.3818(3) 0.79737(16) 0.5916(2) 0.0521(10) Uani 1 1 d . . . . . 
H39A H 0.3989 0.7938 0.5388 0.078 Uiso 1 1 calc R U . . . 
H39B H 0.4190 0.8359 0.6162 0.078 Uiso 1 1 calc R U . . . 
H39C H 0.3030 0.8024 0.5914 0.078 Uiso 1 1 calc R U . . . 
C40 C 0.4937(2) 0.54764(17) 0.7084(2) 0.0379(8) Uani 1 1 d . . . . . 
F4 F 0.6882(5) 0.6880(4) 0.8459(4) 0.0953(19) Uani 0.6 1 d . U P C 1 
F5 F 0.5417(5) 0.6943(3) 0.8919(4) 0.101(2) Uani 0.6 1 d . U P C 1 
F6 F 0.6434(6) 0.6129(4) 0.9209(5) 0.084(2) Uani 0.6 1 d . U P C 1 
F4' F 0.6285(10) 0.7068(5) 0.8510(6) 0.095(3) Uani 0.4 1 d . U P C 2 
F5' F 0.5446(7) 0.6677(5) 0.9382(6) 0.095(2) Uani 0.4 1 d . U P C 2 
F6' F 0.6903(9) 0.6214(6) 0.9080(8) 0.086(3) Uani 0.4 1 d . U P C 2 
O2 O 0.7160(2) 0.77662(13) 0.96564(17) 0.0620(8) Uani 1 1 d . . . . . 
O3 O 0.7397(4) 0.68737(17) 1.03645(18) 0.0942(12) Uani 1 1 d . . . . . 
C41 C 0.7052(3) 0.71871(18) 0.9791(2) 0.0431(8) Uani 1 1 d . . . . . 
C42 C 0.6453(3) 0.6779(2) 0.9137(3) 0.0534(10) Uani 1 1 d . . . . . 
  
loop_ 
 _atom_site_aniso_label 
 _atom_site_aniso_U_11 
 _atom_site_aniso_U_22 
 _atom_site_aniso_U_33 
 _atom_site_aniso_U_23 
 _atom_site_aniso_U_13 
 _atom_site_aniso_U_12 
Pd1 0.01860(12) 0.02508(13) 0.02939(13) -0.00094(9) 0.00162(8) 0.00152(9) 
P1 0.0226(3) 0.0253(4) 0.0229(4) -0.0003(3) -0.0002(3) 0.0043(3) 
P2 0.0214(3) 0.0239(4) 0.0349(4) -0.0012(3) 0.0059(3) -0.0020(3) 
F1 0.0325(11) 0.0903(18) 0.0625(15) 0.0238(13) -0.0010(10) 0.0154(11) 
F2 0.0522(14) 0.0941(19) 0.0739(17) 0.0045(14) 0.0231(12) 0.0317(13) 
F3 0.0335(12) 0.0710(17) 0.157(3) 0.0270(18) -0.0228(15) -0.0112(12) 
O1 0.0189(9) 0.0277(10) 0.0275(10) 0.0071(8) 0.0021(8) 0.0019(8) 
C1 0.0229(13) 0.0284(15) 0.0215(14) 0.0004(11) 0.0038(11) -0.0023(11) 
C2 0.0232(14) 0.0305(15) 0.0253(15) 0.0024(12) 0.0015(11) 0.0022(12) 
C3 0.0296(15) 0.0381(17) 0.0303(16) 0.0116(13) 0.0032(13) 0.0030(13) 
C4 0.0288(16) 0.0485(19) 0.0304(16) 0.0136(14) 0.0058(13) -0.0003(14) 
C5 0.0194(14) 0.052(2) 0.0344(17) 0.0117(15) 0.0040(12) 0.0018(14) 
C6 0.0219(13) 0.0342(16) 0.0234(14) 0.0046(12) 0.0015(11) 0.0023(12) 
C7 0.0205(13) 0.0377(16) 0.0234(14) 0.0062(12) 0.0004(11) 0.0028(12) 
C8 0.0254(14) 0.0280(15) 0.0256(15) 0.0015(12) 0.0010(12) 0.0006(12) 
C9 0.0246(14) 0.0327(16) 0.0334(16) 0.0065(13) -0.0027(12) 0.0004(12) 
C10 0.0335(16) 0.0308(16) 0.0329(17) 0.0069(13) -0.0017(13) -0.0063(13) 
C11 0.0299(15) 0.0307(16) 0.0355(17) 0.0071(13) 0.0039(13) -0.0069(13) 
C12 0.0238(14) 0.0252(14) 0.0297(15) 0.0000(12) 0.0016(12) -0.0011(12) 
C13 0.0255(14) 0.0225(13) 0.0233(14) 0.0010(11) 0.0021(11) 0.0014(11) 
C14 0.0429(19) 0.054(2) 0.0350(18) 0.0081(16) 0.0095(15) 0.0185(17) 
C15 0.0335(17) 0.049(2) 0.0326(17) 0.0124(15) -0.0046(14) -0.0116(15) 
C16 0.0354(18) 0.069(3) 0.055(2) 0.030(2) 0.0118(17) -0.0028(18) 
C17 0.061(3) 0.207(8) 0.180(7) 0.143(7) -0.038(4) -0.068(4) 
C18 0.099(7) 0.115(7) 0.092(8) -0.023(6) 0.071(6) -0.050(7) 
C18' 0.099(8) 0.104(8) 0.085(9) -0.009(7) 0.076(7) -0.039(9) 
C19 0.058(3) 0.091(4) 0.165(6) 0.066(4) 0.031(3) -0.014(3) 
C20 0.0444(19) 0.0435(19) 0.045(2) 0.0193(16) -0.0087(16) -0.0124(16) 
C21 0.078(4) 0.078(5) 0.089(6) 0.060(4) 0.004(4) -0.010(5) 
C22 0.063(5) 0.056(6) 0.032(4) 0.015(4) -0.005(3) -0.007(4) 
C23 0.096(5) 0.032(3) 0.073(4) 0.020(3) -0.030(4) 0.004(4) 
C21' 0.079(5) 0.085(7) 0.079(7) 0.056(6) 0.019(5) 0.011(7) 
C22' 0.067(7) 0.085(9) 0.054(6) 0.038(6) -0.009(5) -0.011(6) 
C23' 0.111(5) 0.063(5) 0.090(5) 0.034(4) -0.020(5) 0.000(5) 
C24 0.0364(17) 0.0367(17) 0.0232(15) -0.0033(13) -0.0036(13) 0.0065(14) 
C25 0.050(2) 0.064(2) 0.0251(17) -0.0004(16) 0.0048(15) 0.0099(18) 
C26 0.0413(19) 0.050(2) 0.0330(18) -0.0006(15) -0.0101(15) 0.0111(16) 
C27 0.061(2) 0.043(2) 0.040(2) -0.0140(16) -0.0055(17) 0.0024(18) 
C28 0.0398(17) 0.0255(14) 0.0258(15) -0.0028(12) 0.0005(13) 0.0033(13) 
C29 0.074(3) 0.0342(18) 0.0292(18) -0.0040(14) -0.0051(17) -0.0023(18) 
C30 0.0442(18) 0.0277(16) 0.0360(18) -0.0012(13) 0.0004(14) -0.0007(14) 
C31 0.050(2) 0.0320(17) 0.054(2) -0.0057(16) 0.0169(17) 0.0081(16) 
C32 0.046(2) 0.0415(19) 0.0417(19) 0.0017(15) 0.0194(16) 0.0076(16) 
C33 0.082(3) 0.056(3) 0.064(3) -0.029(2) 0.028(2) -0.010(2) 
C34 0.054(2) 0.078(3) 0.069(3) 0.009(2) 0.033(2) 0.023(2) 
C35 0.096(4) 0.070(3) 0.047(2) 0.013(2) 0.034(2) 0.026(3) 
C36 0.0280(16) 0.0294(16) 0.056(2) -0.0051(15) -0.0003(15) -0.0054(13) 
C37 0.067(3) 0.044(2) 0.055(2) -0.0212(18) 0.002(2) -0.0082(19) 
C38 0.0294(19) 0.051(2) 0.114(4) -0.012(2) -0.003(2) -0.0132(17) 
C39 0.052(2) 0.0263(17) 0.076(3) -0.0008(17) -0.001(2) -0.0088(16) 
C40 0.0238(15) 0.0436(19) 0.046(2) 0.0066(16) 0.0029(14) 0.0043(14) 
F4 0.111(5) 0.122(4) 0.051(3) -0.025(3) 0.002(3) -0.033(4) 
F5 0.064(3) 0.098(4) 0.127(5) -0.020(3) -0.042(3) 0.010(3) 
F6 0.102(5) 0.041(2) 0.101(4) -0.012(2) -0.019(4) -0.017(3) 
F4' 0.113(6) 0.096(5) 0.065(4) -0.003(4) -0.031(5) -0.005(5) 
F5' 0.060(4) 0.094(5) 0.123(6) -0.021(4) -0.015(4) -0.032(4) 
F6' 0.102(6) 0.059(4) 0.092(5) -0.041(4) -0.016(5) 0.004(5) 
O2 0.074(2) 0.0392(15) 0.0713(19) -0.0060(14) 0.0031(15) -0.0128(14) 
O3 0.159(4) 0.075(2) 0.0452(18) 0.0051(17) -0.004(2) -0.023(2) 
C41 0.047(2) 0.042(2) 0.041(2) -0.0055(16) 0.0118(16) -0.0062(16) 
C42 0.052(2) 0.043(2) 0.062(3) -0.0055(19) -0.006(2) -0.0052(18) 
  
_geom_special_details 
; 
 All esds (except the esd in the dihedral angle between two l.s. planes) 
 are estimated using the full covariance matrix.  The cell esds are taken 
 into account individually in the estimation of esds in distances, angles 
 and torsion angles; correlations between esds in cell parameters are only 
 used when they are defined by crystal symmetry.  An approximate (isotropic) 
 treatment of cell esds is used for estimating esds involving l.s. planes. 
; 
  
loop_ 
 _geom_bond_atom_site_label_1 
 _geom_bond_atom_site_label_2 
 _geom_bond_distance 
 _geom_bond_site_symmetry_2 
 _geom_bond_publ_flag 
Pd1 C40 1.991(3) . ? 
Pd1 O1 2.1533(18) . ? 
Pd1 P1 2.3454(8) . ? 
Pd1 P2 2.3664(8) . ? 
P1 C2 1.835(3) . ? 
P1 C28 1.884(3) . ? 
P1 C24 1.900(3) . ? 
P2 C12 1.830(3) . ? 
P2 C36 1.884(3) . ? 
P2 C32 1.891(3) . ? 
F1 C40 1.346(4) . ? 
F2 C40 1.364(4) . ? 
F3 C40 1.305(4) . ? 
O1 C13 1.414(3) . ? 
O1 C1 1.414(3) . ? 
C1 C6 1.385(4) . ? 
C1 C2 1.394(4) . ? 
C2 C3 1.390(4) . ? 
C3 C4 1.385(4) . ? 
C3 H3 0.9500 . ? 
C4 C5 1.385(4) . ? 
C4 C16 1.536(4) . ? 
C5 C6 1.391(4) . ? 
C5 H5 0.9500 . ? 
C6 C7 1.523(4) . ? 
C7 C8 1.518(4) . ? 
C7 C14 1.540(4) . ? 
C7 C15 1.543(4) . ? 
C8 C13 1.390(4) . ? 
C8 C9 1.396(4) . ? 
C9 C10 1.384(4) . ? 
C9 H9 0.9500 . ? 
C10 C11 1.389(4) . ? 
C10 C20 1.530(4) . ? 
C11 C12 1.394(4) . ? 
C11 H11 0.9500 . ? 
C12 C13 1.393(4) . ? 
C14 H14A 0.9800 . ? 
C14 H14B 0.9800 . ? 
C14 H14C 0.9800 . ? 
C15 H15A 0.9800 . ? 
C15 H15B 0.9800 . ? 
C15 H15C 0.9800 . ? 
C16 C18 1.474(9) . ? 
C16 C19 1.512(6) . ? 
C16 C17 1.524(7) . ? 
C16 C18' 1.593(13) . ? 
C17 H17A 0.9800 . ? 
C17 H17B 0.9800 . ? 
C17 H17C 0.9800 . ? 
C18 H18A 0.9800 . ? 
C18 H18B 0.9800 . ? 
C18 H18C 0.9800 . ? 
C18' H18D 0.9800 . ? 
C18' H18E 0.9800 . ? 
C18' H18F 0.9800 . ? 
C19 H19A 0.9800 . ? 
C19 H19B 0.9800 . ? 
C19 H19C 0.9800 . ? 
C20 C22' 1.472(14) . ? 
C20 C21 1.476(9) . ? 
C20 C23' 1.502(12) . ? 
C20 C22 1.546(9) . ? 
C20 C23 1.582(8) . ? 
C20 C21' 1.609(13) . ? 
C21 H21A 0.9800 . ? 
C21 H21B 0.9800 . ? 
C21 H21C 0.9800 . ? 
C22 H22A 0.9800 . ? 
C22 H22B 0.9800 . ? 
C22 H22C 0.9800 . ? 
C23 H23A 0.9800 . ? 
C23 H23B 0.9800 . ? 
C23 H23C 0.9800 . ? 
C21' H21D 0.9800 . ? 
C21' H21E 0.9800 . ? 
C21' H21F 0.9800 . ? 
C22' H22D 0.9800 . ? 
C22' H22E 0.9800 . ? 
C22' H22F 0.9800 . ? 
C23' H23D 0.9800 . ? 
C23' H23E 0.9800 . ? 
C23' H23F 0.9800 . ? 
C24 C25 1.532(5) . ? 
C24 C27 1.538(5) . ? 
C24 C26 1.540(4) . ? 
C25 H25A 0.9800 . ? 
C25 H25B 0.9800 . ? 
C25 H25C 0.9800 . ? 
C26 H26A 0.9800 . ? 
C26 H26B 0.9800 . ? 
C26 H26C 0.9800 . ? 
C27 H27A 0.9800 . ? 
C27 H27B 0.9800 . ? 
C27 H27C 0.9800 . ? 
C28 C30 1.530(4) . ? 
C28 C29 1.536(4) . ? 
C28 C31 1.536(4) . ? 
C29 H29A 0.9800 . ? 
C29 H29B 0.9800 . ? 
C29 H29C 0.9800 . ? 
C30 H30A 0.9800 . ? 
C30 H30B 0.9800 . ? 
C30 H30C 0.9800 . ? 
C31 H31A 0.9800 . ? 
C31 H31B 0.9800 . ? 
C31 H31C 0.9800 . ? 
C32 C35 1.521(5) . ? 
C32 C33 1.530(5) . ? 
C32 C34 1.532(5) . ? 
C33 H33A 0.9800 . ? 
C33 H33B 0.9800 . ? 
C33 H33C 0.9800 . ? 
C34 H34A 0.9800 . ? 
C34 H34B 0.9800 . ? 
C34 H34C 0.9800 . ? 
C35 H35A 0.9800 . ? 
C35 H35B 0.9800 . ? 
C35 H35C 0.9800 . ? 
C36 C37 1.524(5) . ? 
C36 C39 1.538(5) . ? 
C36 C38 1.538(5) . ? 
C37 H37A 0.9800 . ? 
C37 H37B 0.9800 . ? 
C37 H37C 0.9800 . ? 
C38 H38A 0.9800 . ? 
C38 H38B 0.9800 . ? 
C38 H38C 0.9800 . ? 
C39 H39A 0.9800 . ? 
C39 H39B 0.9800 . ? 
C39 H39C 0.9800 . ? 
F4 C42 1.378(8) . ? 
F5 C42 1.335(7) . ? 
F6 C42 1.321(9) . ? 
F4' C42 1.244(11) . ? 
F5' C42 1.382(10) . ? 
F6' C42 1.279(13) . ? 
O2 C41 1.206(4) . ? 
O3 C41 1.224(5) . ? 
C41 C42 1.533(5) . ? 
  
loop_ 
 _geom_angle_atom_site_label_1 
 _geom_angle_atom_site_label_2 
 _geom_angle_atom_site_label_3 
 _geom_angle 
 _geom_angle_site_symmetry_1 
 _geom_angle_site_symmetry_3 
 _geom_angle_publ_flag 
C40 Pd1 O1 179.30(12) . . ? 
C40 Pd1 P1 95.84(10) . . ? 
O1 Pd1 P1 83.81(5) . . ? 
C40 Pd1 P2 97.20(10) . . ? 
O1 Pd1 P2 83.18(5) . . ? 
P1 Pd1 P2 166.74(3) . . ? 
C2 P1 C28 103.21(14) . . ? 
C2 P1 C24 106.75(13) . . ? 
C28 P1 C24 115.36(14) . . ? 
C2 P1 Pd1 97.87(9) . . ? 
C28 P1 Pd1 113.09(10) . . ? 
C24 P1 Pd1 117.55(11) . . ? 
C12 P2 C36 104.89(14) . . ? 
C12 P2 C32 104.47(15) . . ? 
C36 P2 C32 116.12(16) . . ? 
C12 P2 Pd1 97.88(10) . . ? 
C36 P2 Pd1 115.42(12) . . ? 
C32 P2 Pd1 114.91(11) . . ? 
C13 O1 C1 119.5(2) . . ? 
C13 O1 Pd1 120.33(16) . . ? 
C1 O1 Pd1 119.89(16) . . ? 
C6 C1 C2 122.3(3) . . ? 
C6 C1 O1 121.3(2) . . ? 
C2 C1 O1 116.4(2) . . ? 
C3 C2 C1 117.7(3) . . ? 
C3 C2 P1 120.2(2) . . ? 
C1 C2 P1 121.8(2) . . ? 
C4 C3 C2 122.7(3) . . ? 
C4 C3 H3 118.6 . . ? 
C2 C3 H3 118.6 . . ? 
C5 C4 C3 116.7(3) . . ? 
C5 C4 C16 122.0(3) . . ? 
C3 C4 C16 121.3(3) . . ? 
C4 C5 C6 123.7(3) . . ? 
C4 C5 H5 118.2 . . ? 
C6 C5 H5 118.2 . . ? 
C1 C6 C5 116.9(3) . . ? 
C1 C6 C7 123.7(3) . . ? 
C5 C6 C7 119.2(2) . . ? 
C8 C7 C6 110.4(2) . . ? 
C8 C7 C14 109.1(3) . . ? 
C6 C7 C14 110.4(2) . . ? 
C8 C7 C15 109.0(2) . . ? 
C6 C7 C15 108.8(2) . . ? 
C14 C7 C15 109.1(3) . . ? 
C13 C8 C9 117.5(3) . . ? 
C13 C8 C7 123.5(3) . . ? 
C9 C8 C7 119.0(2) . . ? 
C10 C9 C8 123.1(3) . . ? 
C10 C9 H9 118.4 . . ? 
C8 C9 H9 118.4 . . ? 
C9 C10 C11 116.8(3) . . ? 
C9 C10 C20 121.8(3) . . ? 
C11 C10 C20 121.4(3) . . ? 
C10 C11 C12 123.0(3) . . ? 
C10 C11 H11 118.5 . . ? 
C12 C11 H11 118.5 . . ? 
C13 C12 C11 117.4(3) . . ? 
C13 C12 P2 121.9(2) . . ? 
C11 C12 P2 120.7(2) . . ? 
C8 C13 C12 122.1(3) . . ? 
C8 C13 O1 121.5(2) . . ? 
C12 C13 O1 116.5(2) . . ? 
C7 C14 H14A 109.5 . . ? 
C7 C14 H14B 109.5 . . ? 
H14A C14 H14B 109.5 . . ? 
C7 C14 H14C 109.5 . . ? 
H14A C14 H14C 109.5 . . ? 
H14B C14 H14C 109.5 . . ? 
C7 C15 H15A 109.5 . . ? 
C7 C15 H15B 109.5 . . ? 
H15A C15 H15B 109.5 . . ? 
C7 C15 H15C 109.5 . . ? 
H15A C15 H15C 109.5 . . ? 
H15B C15 H15C 109.5 . . ? 
C18 C16 C19 122.9(6) . . ? 
C18 C16 C17 96.4(6) . . ? 
C19 C16 C17 102.1(5) . . ? 
C18 C16 C4 111.4(5) . . ? 
C19 C16 C4 111.8(3) . . ? 
C17 C16 C4 110.0(3) . . ? 
C19 C16 C18' 93.0(8) . . ? 
C17 C16 C18' 133.9(7) . . ? 
C4 C16 C18' 103.9(6) . . ? 
C16 C17 H17A 109.5 . . ? 
C16 C17 H17B 109.5 . . ? 
H17A C17 H17B 109.5 . . ? 
C16 C17 H17C 109.5 . . ? 
H17A C17 H17C 109.5 . . ? 
H17B C17 H17C 109.5 . . ? 
C16 C18 H18A 109.5 . . ? 
C16 C18 H18B 109.5 . . ? 
H18A C18 H18B 109.5 . . ? 
C16 C18 H18C 109.5 . . ? 
H18A C18 H18C 109.5 . . ? 
H18B C18 H18C 109.5 . . ? 
C16 C18' H18D 109.5 . . ? 
C16 C18' H18E 109.5 . . ? 
H18D C18' H18E 109.5 . . ? 
C16 C18' H18F 109.5 . . ? 
H18D C18' H18F 109.5 . . ? 
H18E C18' H18F 109.5 . . ? 
C16 C19 H19A 109.5 . . ? 
C16 C19 H19B 109.5 . . ? 
H19A C19 H19B 109.5 . . ? 
C16 C19 H19C 109.5 . . ? 
H19A C19 H19C 109.5 . . ? 
H19B C19 H19C 109.5 . . ? 
C22' C20 C23' 118.7(9) . . ? 
C22' C20 C10 116.6(8) . . ? 
C21 C20 C10 114.6(5) . . ? 
C23' C20 C10 109.9(5) . . ? 
C21 C20 C22 113.6(7) . . ? 
C10 C20 C22 105.8(4) . . ? 
C21 C20 C23 106.4(6) . . ? 
C10 C20 C23 107.6(4) . . ? 
C22 C20 C23 108.6(5) . . ? 
C22' C20 C21' 104.1(10) . . ? 
C23' C20 C21' 95.9(9) . . ? 
C10 C20 C21' 109.0(6) . . ? 
C20 C21 H21A 109.5 . . ? 
C20 C21 H21B 109.5 . . ? 
H21A C21 H21B 109.5 . . ? 
C20 C21 H21C 109.5 . . ? 
H21A C21 H21C 109.5 . . ? 
H21B C21 H21C 109.5 . . ? 
C20 C22 H22A 109.5 . . ? 
C20 C22 H22B 109.5 . . ? 
H22A C22 H22B 109.5 . . ? 
C20 C22 H22C 109.5 . . ? 
H22A C22 H22C 109.5 . . ? 
H22B C22 H22C 109.5 . . ? 
C20 C23 H23A 109.5 . . ? 
C20 C23 H23B 109.5 . . ? 
H23A C23 H23B 109.5 . . ? 
C20 C23 H23C 109.5 . . ? 
H23A C23 H23C 109.5 . . ? 
H23B C23 H23C 109.5 . . ? 
C20 C21' H21D 109.5 . . ? 
C20 C21' H21E 109.5 . . ? 
H21D C21' H21E 109.5 . . ? 
C20 C21' H21F 109.5 . . ? 
H21D C21' H21F 109.5 . . ? 
H21E C21' H21F 109.5 . . ? 
C20 C22' H22D 109.5 . . ? 
C20 C22' H22E 109.5 . . ? 
H22D C22' H22E 109.5 . . ? 
C20 C22' H22F 109.5 . . ? 
H22D C22' H22F 109.5 . . ? 
H22E C22' H22F 109.5 . . ? 
C20 C23' H23D 109.5 . . ? 
C20 C23' H23E 109.5 . . ? 
H23D C23' H23E 109.5 . . ? 
C20 C23' H23F 109.5 . . ? 
H23D C23' H23F 109.5 . . ? 
H23E C23' H23F 109.5 . . ? 
C25 C24 C27 108.5(3) . . ? 
C25 C24 C26 106.5(3) . . ? 
C27 C24 C26 110.2(3) . . ? 
C25 C24 P1 114.7(2) . . ? 
C27 C24 P1 104.4(2) . . ? 
C26 C24 P1 112.4(2) . . ? 
C24 C25 H25A 109.5 . . ? 
C24 C25 H25B 109.5 . . ? 
H25A C25 H25B 109.5 . . ? 
C24 C25 H25C 109.5 . . ? 
H25A C25 H25C 109.5 . . ? 
H25B C25 H25C 109.5 . . ? 
C24 C26 H26A 109.5 . . ? 
C24 C26 H26B 109.5 . . ? 
H26A C26 H26B 109.5 . . ? 
C24 C26 H26C 109.5 . . ? 
H26A C26 H26C 109.5 . . ? 
H26B C26 H26C 109.5 . . ? 
C24 C27 H27A 109.5 . . ? 
C24 C27 H27B 109.5 . . ? 
H27A C27 H27B 109.5 . . ? 
C24 C27 H27C 109.5 . . ? 
H27A C27 H27C 109.5 . . ? 
H27B C27 H27C 109.5 . . ? 
C30 C28 C29 109.7(3) . . ? 
C30 C28 C31 108.9(3) . . ? 
C29 C28 C31 107.5(3) . . ? 
C30 C28 P1 114.8(2) . . ? 
C29 C28 P1 105.6(2) . . ? 
C31 C28 P1 110.1(2) . . ? 
C28 C29 H29A 109.5 . . ? 
C28 C29 H29B 109.5 . . ? 
H29A C29 H29B 109.5 . . ? 
C28 C29 H29C 109.5 . . ? 
H29A C29 H29C 109.5 . . ? 
H29B C29 H29C 109.5 . . ? 
C28 C30 H30A 109.5 . . ? 
C28 C30 H30B 109.5 . . ? 
H30A C30 H30B 109.5 . . ? 
C28 C30 H30C 109.5 . . ? 
H30A C30 H30C 109.5 . . ? 
H30B C30 H30C 109.5 . . ? 
C28 C31 H31A 109.5 . . ? 
C28 C31 H31B 109.5 . . ? 
H31A C31 H31B 109.5 . . ? 
C28 C31 H31C 109.5 . . ? 
H31A C31 H31C 109.5 . . ? 
H31B C31 H31C 109.5 . . ? 
C35 C32 C33 109.6(4) . . ? 
C35 C32 C34 106.7(3) . . ? 
C33 C32 C34 109.6(3) . . ? 
C35 C32 P2 116.4(3) . . ? 
C33 C32 P2 103.7(2) . . ? 
C34 C32 P2 110.7(3) . . ? 
C32 C33 H33A 109.5 . . ? 
C32 C33 H33B 109.5 . . ? 
H33A C33 H33B 109.5 . . ? 
C32 C33 H33C 109.5 . . ? 
H33A C33 H33C 109.5 . . ? 
H33B C33 H33C 109.5 . . ? 
C32 C34 H34A 109.5 . . ? 
C32 C34 H34B 109.5 . . ? 
H34A C34 H34B 109.5 . . ? 
C32 C34 H34C 109.5 . . ? 
H34A C34 H34C 109.5 . . ? 
H34B C34 H34C 109.5 . . ? 
C32 C35 H35A 109.5 . . ? 
C32 C35 H35B 109.5 . . ? 
H35A C35 H35B 109.5 . . ? 
C32 C35 H35C 109.5 . . ? 
H35A C35 H35C 109.5 . . ? 
H35B C35 H35C 109.5 . . ? 
C37 C36 C39 108.6(3) . . ? 
C37 C36 C38 111.2(3) . . ? 
C39 C36 C38 106.9(3) . . ? 
C37 C36 P2 104.4(2) . . ? 
C39 C36 P2 114.9(2) . . ? 
C38 C36 P2 110.8(2) . . ? 
C36 C37 H37A 109.5 . . ? 
C36 C37 H37B 109.5 . . ? 
H37A C37 H37B 109.5 . . ? 
C36 C37 H37C 109.5 . . ? 
H37A C37 H37C 109.5 . . ? 
H37B C37 H37C 109.5 . . ? 
C36 C38 H38A 109.5 . . ? 
C36 C38 H38B 109.5 . . ? 
H38A C38 H38B 109.5 . . ? 
C36 C38 H38C 109.5 . . ? 
H38A C38 H38C 109.5 . . ? 
H38B C38 H38C 109.5 . . ? 
C36 C39 H39A 109.5 . . ? 
C36 C39 H39B 109.5 . . ? 
H39A C39 H39B 109.5 . . ? 
C36 C39 H39C 109.5 . . ? 
H39A C39 H39C 109.5 . . ? 
H39B C39 H39C 109.5 . . ? 
F3 C40 F1 105.7(3) . . ? 
F3 C40 F2 105.1(3) . . ? 
F1 C40 F2 101.3(3) . . ? 
F3 C40 Pd1 116.1(2) . . ? 
F1 C40 Pd1 115.6(2) . . ? 
F2 C40 Pd1 111.6(2) . . ? 
O2 C41 O3 129.0(4) . . ? 
O2 C41 C42 115.6(4) . . ? 
O3 C41 C42 115.3(3) . . ? 
F4' C42 F6' 112.2(9) . . ? 
F6 C42 F5 104.3(5) . . ? 
F6 C42 F4 104.1(6) . . ? 
F5 C42 F4 99.9(5) . . ? 
F4' C42 F5' 106.6(7) . . ? 
F6' C42 F5' 108.0(7) . . ? 
F4' C42 C41 115.2(6) . . ? 
F6' C42 C41 111.4(6) . . ? 
F6 C42 C41 118.5(5) . . ? 
F5 C42 C41 116.2(4) . . ? 
F4 C42 C41 111.5(4) . . ? 
F5' C42 C41 102.7(5) . . ? 
  
loop_ 
 _geom_torsion_atom_site_label_1 
 _geom_torsion_atom_site_label_2 
 _geom_torsion_atom_site_label_3 
 _geom_torsion_atom_site_label_4 
 _geom_torsion 
 _geom_torsion_site_symmetry_1 
 _geom_torsion_site_symmetry_2 
 _geom_torsion_site_symmetry_3 
 _geom_torsion_site_symmetry_4 
 _geom_torsion_publ_flag 
C13 O1 C1 C6 -3.6(4) . . . . ? 
Pd1 O1 C1 C6 -177.2(2) . . . . ? 
C13 O1 C1 C2 175.4(2) . . . . ? 
Pd1 O1 C1 C2 1.8(3) . . . . ? 
C6 C1 C2 C3 1.3(4) . . . . ? 
O1 C1 C2 C3 -177.7(3) . . . . ? 
C6 C1 C2 P1 174.5(2) . . . . ? 
O1 C1 C2 P1 -4.5(4) . . . . ? 
C28 P1 C2 C3 61.5(3) . . . . ? 
C24 P1 C2 C3 -60.5(3) . . . . ? 
Pd1 P1 C2 C3 177.5(2) . . . . ? 
C28 P1 C2 C1 -111.6(3) . . . . ? 
C24 P1 C2 C1 126.4(2) . . . . ? 
Pd1 P1 C2 C1 4.5(3) . . . . ? 
C1 C2 C3 C4 -0.9(5) . . . . ? 
P1 C2 C3 C4 -174.3(3) . . . . ? 
C2 C3 C4 C5 -0.5(5) . . . . ? 
C2 C3 C4 C16 178.9(3) . . . . ? 
C3 C4 C5 C6 1.7(5) . . . . ? 
C16 C4 C5 C6 -177.6(3) . . . . ? 
C2 C1 C6 C5 -0.2(4) . . . . ? 
O1 C1 C6 C5 178.8(3) . . . . ? 
C2 C1 C6 C7 -177.2(3) . . . . ? 
O1 C1 C6 C7 1.8(4) . . . . ? 
C4 C5 C6 C1 -1.4(5) . . . . ? 
C4 C5 C6 C7 175.7(3) . . . . ? 
C1 C6 C7 C8 1.2(4) . . . . ? 
C5 C6 C7 C8 -175.7(3) . . . . ? 
C1 C6 C7 C14 -119.5(3) . . . . ? 
C5 C6 C7 C14 63.6(4) . . . . ? 
C1 C6 C7 C15 120.8(3) . . . . ? 
C5 C6 C7 C15 -56.1(4) . . . . ? 
C6 C7 C8 C13 -2.7(4) . . . . ? 
C14 C7 C8 C13 118.8(3) . . . . ? 
C15 C7 C8 C13 -122.1(3) . . . . ? 
C6 C7 C8 C9 176.8(3) . . . . ? 
C14 C7 C8 C9 -61.6(3) . . . . ? 
C15 C7 C8 C9 57.4(4) . . . . ? 
C13 C8 C9 C10 0.5(5) . . . . ? 
C7 C8 C9 C10 -179.1(3) . . . . ? 
C8 C9 C10 C11 -2.2(5) . . . . ? 
C8 C9 C10 C20 177.1(3) . . . . ? 
C9 C10 C11 C12 2.1(5) . . . . ? 
C20 C10 C11 C12 -177.2(3) . . . . ? 
C10 C11 C12 C13 -0.4(5) . . . . ? 
C10 C11 C12 P2 177.8(2) . . . . ? 
C36 P2 C12 C13 -116.1(3) . . . . ? 
C32 P2 C12 C13 121.3(3) . . . . ? 
Pd1 P2 C12 C13 3.0(2) . . . . ? 
C36 P2 C12 C11 65.9(3) . . . . ? 
C32 P2 C12 C11 -56.8(3) . . . . ? 
Pd1 P2 C12 C11 -175.1(2) . . . . ? 
C9 C8 C13 C12 1.4(4) . . . . ? 
C7 C8 C13 C12 -179.1(3) . . . . ? 
C9 C8 C13 O1 -178.4(3) . . . . ? 
C7 C8 C13 O1 1.2(4) . . . . ? 
C11 C12 C13 C8 -1.4(4) . . . . ? 
P2 C12 C13 C8 -179.6(2) . . . . ? 
C11 C12 C13 O1 178.4(2) . . . . ? 
P2 C12 C13 O1 0.2(4) . . . . ? 
C1 O1 C13 C8 2.2(4) . . . . ? 
Pd1 O1 C13 C8 175.7(2) . . . . ? 
C1 O1 C13 C12 -177.6(2) . . . . ? 
Pd1 O1 C13 C12 -4.1(3) . . . . ? 
C5 C4 C16 C18 -64.1(7) . . . . ? 
C3 C4 C16 C18 116.5(6) . . . . ? 
C5 C4 C16 C19 154.2(4) . . . . ? 
C3 C4 C16 C19 -25.1(6) . . . . ? 
C5 C4 C16 C17 41.6(6) . . . . ? 
C3 C4 C16 C17 -137.8(5) . . . . ? 
C5 C4 C16 C18' -106.8(8) . . . . ? 
C3 C4 C16 C18' 73.9(8) . . . . ? 
C9 C10 C20 C22' -27.3(9) . . . . ? 
C11 C10 C20 C22' 152.0(8) . . . . ? 
C9 C10 C20 C21 -178.4(6) . . . . ? 
C11 C10 C20 C21 0.8(7) . . . . ? 
C9 C10 C20 C23' 111.5(8) . . . . ? 
C11 C10 C20 C23' -69.3(9) . . . . ? 
C9 C10 C20 C22 -52.4(6) . . . . ? 
C11 C10 C20 C22 126.8(5) . . . . ? 
C9 C10 C20 C23 63.5(5) . . . . ? 
C11 C10 C20 C23 -117.3(5) . . . . ? 
C9 C10 C20 C21' -144.6(7) . . . . ? 
C11 C10 C20 C21' 34.6(8) . . . . ? 
C2 P1 C28 C30 -68.5(2) . . . . ? 
C24 P1 C28 C30 47.5(3) . . . . ? 
Pd1 P1 C28 C30 -173.16(19) . . . . ? 
C2 P1 C28 C29 52.5(3) . . . . ? 
C24 P1 C28 C29 168.5(2) . . . . ? 
Pd1 P1 C28 C29 -52.2(2) . . . . ? 
C2 P1 C28 C31 168.2(2) . . . . ? 
C24 P1 C28 C31 -75.7(3) . . . . ? 
Pd1 P1 C28 C31 63.6(2) . . . . ? 
C12 P2 C32 C35 58.2(3) . . . . ? 
C36 P2 C32 C35 -56.8(4) . . . . ? 
Pd1 P2 C32 C35 164.2(3) . . . . ? 
C12 P2 C32 C33 -62.3(3) . . . . ? 
C36 P2 C32 C33 -177.3(3) . . . . ? 
Pd1 P2 C32 C33 43.7(3) . . . . ? 
C12 P2 C32 C34 -179.7(3) . . . . ? 
C36 P2 C32 C34 65.3(3) . . . . ? 
Pd1 P2 C32 C34 -73.7(3) . . . . ? 
C12 P2 C36 C37 75.9(3) . . . . ? 
C32 P2 C36 C37 -169.4(2) . . . . ? 
Pd1 P2 C36 C37 -30.5(3) . . . . ? 
C12 P2 C36 C39 -42.9(3) . . . . ? 
C32 P2 C36 C39 71.8(3) . . . . ? 
Pd1 P2 C36 C39 -149.4(2) . . . . ? 
C12 P2 C36 C38 -164.2(3) . . . . ? 
C32 P2 C36 C38 -49.5(3) . . . . ? 
Pd1 P2 C36 C38 89.3(3) . . . . ? 
O2 C41 C42 F4' 9.8(9) . . . . ? 
O3 C41 C42 F4' -167.1(8) . . . . ? 
O2 C41 C42 F6' 139.1(7) . . . . ? 
O3 C41 C42 F6' -37.8(8) . . . . ? 
O2 C41 C42 F6 171.2(5) . . . . ? 
O3 C41 C42 F6 -5.7(7) . . . . ? 
O2 C41 C42 F5 -63.3(7) . . . . ? 
O3 C41 C42 F5 119.8(6) . . . . ? 
O2 C41 C42 F4 50.3(6) . . . . ? 
O3 C41 C42 F4 -126.6(5) . . . . ? 
O2 C41 C42 F5' -105.6(6) . . . . ? 
O3 C41 C42 F5' 77.5(6) . . . . ? 
  
_refine_diff_density_max    0.875 
_refine_diff_density_min   -0.632 
_refine_diff_density_rms    0.077 
  
_shelxl_version_number 2013-4 
  
_shelx_res_file 
; 
TITL mo_d8v19405_0m_a.res in P2(1)/c 
CELL 0.71073 12.3707 20.2354 17.5915 90 96.941 90 
ZERR 4 0.0005 0.0009 0.0008 0 0.002 0 
LATT 1 
SYMM -X,0.5+Y,0.5-Z 
SFAC C  H  F  O  P  Pd 
UNIT 168 256 24 12 8 4 
OMIT 0 1 1 
OMIT 0 0 2 
OMIT 0 2 0 
OMIT 1 0 0 
OMIT 1 1 0 
OMIT  -3.00  52.00 
L.S. 12 
ACTA 
BOND $H 
FMAP 2 
PLAN 20 
LIST 4 
dfix 1.55 0.02 c20 c21 c20 c21' c20 c22 c20 c22' c20 c23 c20 c23' 
dfix 1.55 0.02 c16 c18 c16 c18' 
simu 0.003 c21 c23 c21' c23' c18 c18' c22 c22' 
simu 0.004 f5 f5' f4 f4' f6' f6 
size 0.16 0.13 0.08 
wpdb -1 
mpla 
htab 
conf 
TEMP -80.14 
WGHT    0.035600    7.015200 
EXTI    0.001740 
FVAR       0.32766 
PD1   6    0.336855    0.571044    0.685443    11.00000    0.01860    0.02508 = 
         0.02939   -0.00094    0.00162    0.00152 
P1    5    0.273364    0.490293    0.764800    11.00000    0.02263    0.02535 = 
         0.02292   -0.00030   -0.00018    0.00429 
P2    5    0.357671    0.655361    0.595140    11.00000    0.02144    0.02395 = 
         0.03490   -0.00120    0.00595   -0.00198 
F1    3    0.520137    0.511153    0.771964    11.00000    0.03254    0.09026 = 
         0.06253    0.02377   -0.00095    0.01537 
F2    3    0.526926    0.507338    0.653558    11.00000    0.05218    0.09413 = 
         0.07393    0.00449    0.02314    0.03165 
F3    3    0.562143    0.597029    0.713688    11.00000    0.03355    0.07097 = 
         0.15737    0.02704   -0.02280   -0.01121 
O1    4    0.167119    0.596597    0.662045    11.00000    0.01895    0.02766 = 
         0.02751    0.00709    0.00211    0.00191 
C1    1    0.088805    0.561473    0.698328    11.00000    0.02286    0.02841 = 
         0.02151    0.00036    0.00383   -0.00234 
C2    1    0.128488    0.512457    0.750017    11.00000    0.02325    0.03051 = 
         0.02528    0.00239    0.00153    0.00223 
C3    1    0.053047    0.475555    0.784449    11.00000    0.02965    0.03808 = 
         0.03032    0.01160    0.00316    0.00301 
AFIX  43 
H3    2    0.078814    0.441533    0.819216    11.00000   -1.20000 
AFIX   0 
C4    1   -0.058121    0.486316    0.770187    11.00000    0.02883    0.04850 = 
         0.03040    0.01365    0.00577   -0.00035 
C5    1   -0.092045    0.536720    0.719631    11.00000    0.01937    0.05153 = 
         0.03441    0.01169    0.00402    0.00175 
AFIX  43 
H5    2   -0.167813    0.545806    0.710083    11.00000   -1.20000 
AFIX   0 
C6    1   -0.021354    0.574804    0.682035    11.00000    0.02190    0.03425 = 
         0.02345    0.00461    0.00149    0.00227 
C7    1   -0.068062    0.625771    0.623357    11.00000    0.02051    0.03766 = 
         0.02339    0.00619    0.00044    0.00279 
C8    1    0.022429    0.657771    0.585188    11.00000    0.02540    0.02801 = 
         0.02555    0.00153    0.00105    0.00061 
C9    1   -0.004709    0.703624    0.526737    11.00000    0.02463    0.03275 = 
         0.03345    0.00650   -0.00271    0.00038 
AFIX  43 
H9    2   -0.079371    0.714057    0.512911    11.00000   -1.20000 
AFIX   0 
C10   1    0.071966    0.734614    0.487967    11.00000    0.03351    0.03076 = 
         0.03294    0.00688   -0.00172   -0.00628 
C11   1    0.180484    0.719863    0.511492    11.00000    0.02994    0.03071 = 
         0.03546    0.00711    0.00391   -0.00693 
AFIX  43 
H11   2    0.234850    0.741624    0.486966    11.00000   -1.20000 
AFIX   0 
C12   1    0.213323    0.674595    0.569440    11.00000    0.02381    0.02524 = 
         0.02973    0.00002    0.00155   -0.00110 
C13   1    0.132152    0.643610    0.604874    11.00000    0.02554    0.02252 = 
         0.02333    0.00103    0.00214    0.00137 
C14   1   -0.130138    0.679746    0.662053    11.00000    0.04292    0.05420 = 
         0.03495    0.00815    0.00952    0.01851 
AFIX 137 
H14A  2   -0.079032    0.704486    0.698347    11.00000   -1.50000 
H14B  2   -0.185817    0.659153    0.689440    11.00000   -1.50000 
H14C  2   -0.165061    0.709941    0.622992    11.00000   -1.50000 
AFIX   0 
C15   1   -0.147272    0.590733    0.561778    11.00000    0.03350    0.04864 = 
         0.03258    0.01236   -0.00464   -0.01163 
AFIX 137 
H15A  2   -0.181624    0.623534    0.525620    11.00000   -1.50000 
H15B  2   -0.203483    0.567691    0.586347    11.00000   -1.50000 
H15C  2   -0.107027    0.558717    0.534249    11.00000   -1.50000 
AFIX   0 
C16   1   -0.139214    0.443697    0.808199    11.00000    0.03540    0.06866 = 
         0.05480    0.03011    0.01178   -0.00279 
C17   1   -0.236621    0.426325    0.750091    11.00000    0.06066    0.20741 = 
         0.18004    0.14292   -0.03777   -0.06769 
AFIX 137 
H17A  2   -0.280321    0.466087    0.737376    11.00000   -1.50000 
H17B  2   -0.281300    0.392969    0.771954    11.00000   -1.50000 
H17C  2   -0.210877    0.408750    0.703577    11.00000   -1.50000 
PART 1 
AFIX   0 
C18   1   -0.200034    0.483532    0.858848    10.60000    0.09895    0.11496 = 
         0.09167   -0.02271    0.07052   -0.05039 
AFIX 137 
H18A  2   -0.251699    0.455190    0.881657    10.60000   -1.50000 
H18B  2   -0.239830    0.518662    0.829032    10.60000   -1.50000 
H18C  2   -0.149017    0.503234    0.899537    10.60000   -1.50000 
PART 2 
AFIX   0 
C18'  1   -0.126345    0.468903    0.894639    10.40000    0.09916    0.10438 = 
         0.08515   -0.00884    0.07629   -0.03894 
AFIX 137 
H18D  2   -0.169224    0.440630    0.924903    10.40000   -1.50000 
H18E  2   -0.152428    0.514555    0.896208    10.40000   -1.50000 
H18F  2   -0.049468    0.467026    0.915965    10.40000   -1.50000 
PART 0 
AFIX   0 
C19   1   -0.092872    0.376285    0.830342    11.00000    0.05825    0.09099 = 
         0.16473    0.06591    0.03076   -0.01443 
AFIX 137 
H19A  2   -0.063732    0.356279    0.786341    11.00000   -1.50000 
H19B  2   -0.150480    0.348036    0.846192    11.00000   -1.50000 
H19C  2   -0.034374    0.380856    0.872840    11.00000   -1.50000 
AFIX   0 
C20   1    0.039125    0.782242    0.421668    11.00000    0.04443    0.04353 = 
         0.04496    0.01929   -0.00866   -0.01236 
PART 1 
C21   1    0.131070    0.809479    0.385489    10.60000    0.07826    0.07803 = 
         0.08924    0.05999    0.00394   -0.00996 
AFIX 137 
H21A  2    0.181361    0.832225    0.424207    10.60000   -1.50000 
H21B  2    0.103471    0.840854    0.345331    10.60000   -1.50000 
H21C  2    0.169439    0.773446    0.362902    10.60000   -1.50000 
AFIX   0 
C22   1   -0.044656    0.744423    0.365454    10.60000    0.06289    0.05567 = 
         0.03184    0.01548   -0.00475   -0.00749 
AFIX 137 
H22A  2   -0.072617    0.773712    0.323235    10.60000   -1.50000 
H22B  2   -0.105048    0.729545    0.392467    10.60000   -1.50000 
H22C  2   -0.009413    0.706038    0.345025    10.60000   -1.50000 
AFIX   0 
C23   1   -0.019965    0.843311    0.454806    10.60000    0.09579    0.03244 = 
         0.07347    0.02017   -0.02968    0.00432 
AFIX 137 
H23A  2    0.028293    0.863241    0.496893    10.60000   -1.50000 
H23B  2   -0.087127    0.828382    0.473807    10.60000   -1.50000 
H23C  2   -0.037656    0.876127    0.414238    10.60000   -1.50000 
PART 2 
AFIX   0 
C21'  1    0.122588    0.774049    0.358920    10.40000    0.07909    0.08507 = 
         0.07915    0.05645    0.01854    0.01078 
AFIX 137 
H21D  2    0.105474    0.806720    0.318116    10.40000   -1.50000 
H21E  2    0.115926    0.729471    0.337082    10.40000   -1.50000 
H21F  2    0.197212    0.780963    0.383333    10.40000   -1.50000 
AFIX   0 
C22'  1   -0.068663    0.771745    0.377978    10.40000    0.06746    0.08498 = 
         0.05391    0.03808   -0.00909   -0.01082 
AFIX 137 
H22D  2   -0.110511    0.740659    0.405590    10.40000   -1.50000 
H22E  2   -0.059736    0.753611    0.327457    10.40000   -1.50000 
H22F  2   -0.107515    0.813974    0.371794    10.40000   -1.50000 
AFIX   0 
C23'  1    0.072729    0.851394    0.444919    10.40000    0.11143    0.06319 = 
         0.09020    0.03445   -0.01953   -0.00045 
AFIX 137 
H23D  2    0.083970    0.877093    0.399312    10.40000   -1.50000 
H23E  2    0.140629    0.850059    0.479920    10.40000   -1.50000 
H23F  2    0.015507    0.872138    0.470691    10.40000   -1.50000 
PART 0 
AFIX   0 
C24   1    0.318415    0.496674    0.871718    11.00000    0.03644    0.03669 = 
         0.02321   -0.00335   -0.00357    0.00650 
C25   1    0.229203    0.481758    0.922525    11.00000    0.04953    0.06400 = 
         0.02511   -0.00040    0.00482    0.00988 
AFIX 137 
H25A  2    0.167407    0.511552    0.909027    11.00000   -1.50000 
H25B  2    0.258058    0.488308    0.976367    11.00000   -1.50000 
H25C  2    0.205068    0.435871    0.914685    11.00000   -1.50000 
AFIX   0 
C26   1    0.413990    0.450109    0.898253    11.00000    0.04134    0.04992 = 
         0.03301   -0.00064   -0.01014    0.01113 
AFIX 137 
H26A  2    0.389728    0.404120    0.891930    11.00000   -1.50000 
H26B  2    0.439495    0.458519    0.952314    11.00000   -1.50000 
H26C  2    0.473583    0.458046    0.867408    11.00000   -1.50000 
AFIX   0 
C27   1    0.353807    0.569099    0.884111    11.00000    0.06132    0.04282 = 
         0.03993   -0.01396   -0.00545    0.00241 
AFIX 137 
H27A  2    0.418697    0.577392    0.858632    11.00000   -1.50000 
H27B  2    0.370562    0.577775    0.939080    11.00000   -1.50000 
H27C  2    0.294720    0.598291    0.862520    11.00000   -1.50000 
AFIX   0 
C28   1    0.275313    0.404456    0.723520    11.00000    0.03984    0.02550 = 
         0.02582   -0.00284    0.00051    0.00327 
C29   1    0.214372    0.409499    0.642323    11.00000    0.07375    0.03422 = 
         0.02917   -0.00402   -0.00506   -0.00225 
AFIX 137 
H29A  2    0.137057    0.418098    0.645383    11.00000   -1.50000 
H29B  2    0.222109    0.367894    0.614980    11.00000   -1.50000 
H29C  2    0.245066    0.445721    0.614794    11.00000   -1.50000 
AFIX   0 
C30   1    0.222263    0.351417    0.768750    11.00000    0.04416    0.02772 = 
         0.03595   -0.00123    0.00038   -0.00074 
AFIX 137 
H30A  2    0.255824    0.351857    0.822143    11.00000   -1.50000 
H30B  2    0.232829    0.307932    0.746261    11.00000   -1.50000 
H30C  2    0.144163    0.360498    0.766812    11.00000   -1.50000 
AFIX   0 
C31   1    0.392907    0.383648    0.715891    11.00000    0.05007    0.03197 = 
         0.05395   -0.00570    0.01692    0.00806 
AFIX 137 
H31A  2    0.425557    0.415370    0.683275    11.00000   -1.50000 
H31B  2    0.392925    0.339558    0.692840    11.00000   -1.50000 
H31C  2    0.435276    0.382737    0.766689    11.00000   -1.50000 
AFIX   0 
C32   1    0.405189    0.625996    0.502689    11.00000    0.04620    0.04146 = 
         0.04171    0.00174    0.01937    0.00762 
C33   1    0.336833    0.564008    0.482497    11.00000    0.08180    0.05623 = 
         0.06353   -0.02915    0.02785   -0.00954 
AFIX 137 
H33A  2    0.349158    0.532112    0.524573    11.00000   -1.50000 
H33B  2    0.358029    0.544236    0.435644    11.00000   -1.50000 
H33C  2    0.259539    0.575980    0.474345    11.00000   -1.50000 
AFIX   0 
C34   1    0.526092    0.607470    0.515118    11.00000    0.05446    0.07787 = 
         0.06851    0.00944    0.03311    0.02279 
AFIX 137 
H34A  2    0.570060    0.647634    0.524042    11.00000   -1.50000 
H34B  2    0.545778    0.584675    0.469598    11.00000   -1.50000 
H34C  2    0.539792    0.578247    0.559664    11.00000   -1.50000 
AFIX   0 
C35   1    0.390865    0.674093    0.435780    11.00000    0.09606    0.07046 = 
         0.04712    0.01309    0.03424    0.02615 
AFIX 137 
H35A  2    0.313056    0.681302    0.419978    11.00000   -1.50000 
H35B  2    0.424634    0.655714    0.392815    11.00000   -1.50000 
H35C  2    0.425678    0.716250    0.451439    11.00000   -1.50000 
AFIX   0 
C36   1    0.420224    0.734537    0.636114    11.00000    0.02800    0.02944 = 
         0.05600   -0.00511   -0.00032   -0.00537 
C37   1    0.384901    0.738664    0.716042    11.00000    0.06720    0.04409 = 
         0.05475   -0.02119    0.00218   -0.00824 
AFIX 137 
H37A  2    0.305216    0.737900    0.712184    11.00000   -1.50000 
H37B  2    0.412147    0.779831    0.740704    11.00000   -1.50000 
H37C  2    0.414630    0.700915    0.746627    11.00000   -1.50000 
AFIX   0 
C38   1    0.545026    0.732357    0.639663    11.00000    0.02938    0.05087 = 
         0.11381   -0.01151   -0.00304   -0.01324 
AFIX 137 
H38A  2    0.572231    0.690782    0.663321    11.00000   -1.50000 
H38B  2    0.576727    0.769617    0.670229    11.00000   -1.50000 
H38C  2    0.565631    0.735285    0.587700    11.00000   -1.50000 
AFIX   0 
C39   1    0.381796    0.797371    0.591604    11.00000    0.05231    0.02633 = 
         0.07552   -0.00079   -0.00117   -0.00879 
AFIX 137 
H39A  2    0.398902    0.793835    0.538796    11.00000   -1.50000 
H39B  2    0.419030    0.835931    0.616228    11.00000   -1.50000 
H39C  2    0.302972    0.802383    0.591429    11.00000   -1.50000 
AFIX   0 
C40   1    0.493745    0.547644    0.708436    11.00000    0.02380    0.04362 = 
         0.04606    0.00660    0.00292    0.00428 
PART 1 
F4    3    0.688236    0.687993    0.845933    10.60000    0.11094    0.12168 = 
         0.05136   -0.02500    0.00222   -0.03341 
F5    3    0.541686    0.694319    0.891943    10.60000    0.06351    0.09840 = 
         0.12722   -0.02021   -0.04196    0.01000 
F6    3    0.643368    0.612922    0.920887    10.60000    0.10238    0.04068 = 
         0.10109   -0.01218   -0.01913   -0.01734 
PART 2 
F4'   3    0.628459    0.706796    0.851007    10.40000    0.11263    0.09621 = 
         0.06525   -0.00292   -0.03120   -0.00544 
F5'   3    0.544572    0.667668    0.938155    10.40000    0.06010    0.09439 = 
         0.12338   -0.02108   -0.01457   -0.03166 
F6'   3    0.690307    0.621439    0.907997    10.40000    0.10181    0.05853 = 
         0.09165   -0.04129   -0.01630    0.00361 
PART 0 
O2    4    0.715991    0.776616    0.965643    11.00000    0.07411    0.03920 = 
         0.07128   -0.00596    0.00307   -0.01281 
O3    4    0.739725    0.687367    1.036447    11.00000    0.15856    0.07473 = 
         0.04517    0.00505   -0.00438   -0.02313 
C41   1    0.705244    0.718707    0.979097    11.00000    0.04721    0.04216 = 
         0.04137   -0.00552    0.01178   -0.00623 
C42   1    0.645323    0.677861    0.913700    11.00000    0.05192    0.04282 = 
         0.06247   -0.00554   -0.00571   -0.00523 
HKLF 4 
  
REM  mo_d8v19405_0m_a.res in P2(1)/c 
REM R1 =  0.0404 for    7326 Fo > 4sig(Fo)  and  0.0504 for all    8577 data 
REM    575 parameters refined using     74 restraints 
  
END 
  
WGHT      0.0356      7.0156 
  
REM Instructions for potential hydrogen bonds 
HTAB C26 F1 
HTAB C27 F1 
EQIV $1 -x+1, y-1/2, -z+3/2 
HTAB C29 O2_$1 
EQIV $2 -x+1, -y+1, -z+2 
HTAB C30 O3_$2 
HTAB C31 F2 
EQIV $3 -x+1, -y+1, -z+1 
HTAB C33 F2_$3 
HTAB C34 F2 
EQIV $4 x, -y+3/2, z-1/2 
HTAB C35 F5_$4 
HTAB C38 F3 
  
REM Highest difference peak  0.875,  deepest hole -0.632,  1-sigma level  0.077 
Q1    1   0.5559  0.5567  0.6589  11.00000  0.05    0.88 
Q2    1  -0.2451  0.4737  0.7979  11.00000  0.05    0.79 
Q3    1   0.5214  0.6078  0.7681  11.00000  0.05    0.74 
Q4    1   0.0727  0.7402  0.3440  11.00000  0.05    0.65 
Q5    1  -0.0784  0.8009  0.4083  11.00000  0.05    0.63 
Q6    1  -0.0953  0.4162  0.8773  11.00000  0.05    0.59 
Q7    1   0.7293  0.6491  0.8615  11.00000  0.05    0.49 
Q8    1  -0.0898  0.4866  0.9174  11.00000  0.05    0.46 
Q9    1   0.5794  0.6289  0.9420  11.00000  0.05    0.45 
Q10   1   0.1241  0.8365  0.4176  11.00000  0.05    0.42 
Q11   1   0.6459  0.7027  1.0315  11.00000  0.05    0.41 
Q12   1   0.0088  0.8502  0.4415  11.00000  0.05    0.40 
Q13   1   0.5737  0.7180  0.8596  11.00000  0.05    0.40 
Q14   1   0.6642  0.7056  0.8412  11.00000  0.05    0.40 
Q15   1   0.5363  0.6908  0.9236  11.00000  0.05    0.40 
Q16   1   0.1767  0.7397  0.3453  11.00000  0.05    0.36 
Q17   1  -0.1018  0.3581  0.8343  11.00000  0.05    0.35 
Q18   1  -0.0391  0.5967  0.6560  11.00000  0.05    0.34 
Q19   1  -0.1517  0.4653  0.8982  11.00000  0.05    0.33 
Q20   1  -0.1271  0.3836  0.7814  11.00000  0.05    0.32 
; 
_shelx_res_checksum   35588 
  
_shelx_hkl_file 
; 
   1   0   0    0.70    0.40 
  -2   0   0  176.28    7.20 
   2   0   0  177.68    7.20 
   2   0   0  172.68    7.20 
  -2   0   0  183.28    7.30 
   3   0   0 3649.53   63.09 
  -3   0   0 3655.43   63.19 
  -3   0   0 3686.93   63.39 
   3   0   0 3618.84   63.19 
  -4   0   0 1410.36   32.00 
  -4   0   0 1400.46   33.30 
  -4   0   0 1405.36   31.80 
  -4   0   0 1422.06   33.50 
   4   0   0 1404.96   33.10 
   4   0   0 1381.66   33.30 
  -5   0   0  734.23   22.60 
  -5   0   0  713.53   23.70 
   5   0   0  724.13   23.80 
  -5   0   0  724.83   22.80 
   5   0   0  750.42   24.40 
  -5   0   0  745.93   24.40 
  -6   0   0 1009.60   31.20 
   6   0   0  935.61   30.10 
  -6   0   0 1039.20   31.70 
   6   0   0  984.50   31.10 
  -6   0   0  987.90   29.00 
  -6   0   0  984.30   29.20 
   7   0   0  503.25   22.60 
  -7   0   0  509.25   21.00 
  -7   0   0  519.45   22.80 
   7   0   0  485.65   21.90 
  -7   0   0  495.55   20.70 
  -7   0   0  464.25   22.00 
   8   0   0    9.70    3.90 
  -8   0   0    5.60    3.00 
  -8   0   0    5.00    3.60 
   8   0   0    0.60    1.80 
  -8   0   0   11.90    4.60 
  -8   0   0    5.20    3.30 
  -9   0   0  450.55   23.90 
  -9   0   0  476.75   22.60 
  -9   0   0  492.25   25.20 
  -9   0   0  456.95   22.40 
   9   0   0  466.85   24.70 
   9   0   0  442.46   23.50 
  10   0   0  739.33   33.70 
  10   0   0  817.42   34.20 
 -10   0   0  780.42   31.50 
 -10   0   0  761.22   31.20 
  11   0   0    5.90    3.50 
 -11   0   0    0.10    2.80 
 -11   0   0    4.50    3.60 
 -12   0   0  276.07   20.00 
 -12   0   0  264.47   19.30 
 -13   0   0  328.67   22.10 
 -13   0   0  263.67   20.70 
 -14   0   0   53.69   11.10 
 -14   0   0   48.50   10.10 
 -15   0   0  321.17   23.90 
 -15   0   0  339.47   24.50 
   1  -1   0   -0.50    0.30 
   1  -1   0    0.50    0.40 
   1   1   0    2.20    0.50 
   2  -1   0   16.40    3.00 
  -2  -1   0   18.30    2.00 
  -2  -1   0   20.50    2.20 
   2  -1   0   15.00    2.80 
  -2  -1   0   15.80    1.80 
   2   1   0   19.70    2.20 
  -2   1   0   15.40    2.70 
   2   1   0   22.30    2.10 
  -2   1   0   17.40    2.40 
   2   1   0   18.90    2.20 
   3  -1   0  939.21   24.20 
  -3  -1   0  936.41   21.00 
  -3  -1   0  971.70   22.30 
  -3  -1   0  975.10   22.70 
   3  -1   0  970.60   24.50 
  -3   1   0  936.51   24.00 
  -3   1   0  928.01   23.20 
   3   1   0  934.31   22.40 
  -3   1   0  965.40   24.60 
   3   1   0  950.70   22.10 
   4  -1   0  137.29    9.10 
   4  -1   0  145.09    9.50 
  -4  -1   0  145.99    7.90 
  -4  -1   0  134.59    9.90 
  -4   1   0  160.68    9.30 
   4   1   0  148.69    8.70 
   4   1   0  142.69    8.40 
  -4   1   0  153.68    9.60 
  -4   1   0  147.39    9.60 
   5  -1   0 3558.54   69.69 
  -5  -1   0 3493.25   66.89 
   5  -1   0 3537.65   69.89 
  -5  -1   0 3557.54   67.49 
  -5  -1   0 3526.55   64.29 
  -5  -1   0 3489.65   64.99 
   5   1   0 3458.25   66.39 
  -5   1   0 3570.54   67.69 
   5   1   0 3412.96   66.79 
  -5   1   0 3502.55   69.29 
  -5   1   0 3521.95   69.99 
   6  -1   0 1508.85   40.70 
  -6  -1   0 1453.55   38.70 
  -6  -1   0 1469.25   36.20 
   6  -1   0 1461.75   40.60 
  -6  -1   0 1375.96   37.70 
  -6  -1   0 1479.15   36.60 
  -6   1   0 1445.06   38.50 
  -6   1   0 1452.25   40.60 
  -6   1   0 1514.05   38.70 
   6   1   0 1444.76   38.50 
   6   1   0 1471.75   38.10 
  -6   1   0 1435.66   39.90 
   7  -1   0   -0.70    2.20 
  -7  -1   0    1.60    2.00 
  -7  -1   0    0.70    1.90 
  -7  -1   0    2.30    2.30 
  -7  -1   0    3.00    2.20 
  -7   1   0    0.40    2.10 
  -7   1   0    4.60    2.30 
  -7   1   0    4.40    2.40 
   7   1   0   -0.40    1.70 
   7   1   0   -0.40    1.80 
   8  -1   0  118.59   11.80 
  -8  -1   0  108.99    9.80 
  -8  -1   0  122.89   11.20 
  -8  -1   0  124.09   11.30 
  -8  -1   0  103.09    9.40 
  -8   1   0  121.29   11.30 
  -8   1   0  106.19   11.50 
  -8   1   0  100.79   13.30 
   8   1   0  129.19   11.30 
   8   1   0  115.79   10.90 
  -9  -1   0   16.10    4.80 
   9  -1   0   13.60    4.80 
  -9  -1   0   19.70    5.00 
  -9  -1   0    5.80    3.10 
  -9  -1   0   11.90    4.10 
   9  -1   0    8.40    3.90 
  -9   1   0    4.70    3.40 
  -9   1   0    3.90    2.70 
  -9   1   0   13.10    4.80 
   9   1   0    8.10    4.40 
  -9   1   0   12.50    4.80 
 -10  -1   0   76.79   12.40 
  10  -1   0   76.39   10.50 
 -10  -1   0   68.69   11.30 
  10  -1   0   71.89   12.30 
 -10  -1   0   61.39    8.50 
 -10  -1   0   63.59    8.70 
  10   1   0   59.99    8.60 
 -10   1   0   67.59    9.00 
 -10   1   0   67.09   11.10 
  11  -1   0  132.39   13.90 
 -11  -1   0  130.09   12.60 
 -11  -1   0  111.09   11.60 
  11  -1   0  127.69   14.30 
 -11   1   0  141.79   13.90 
  11   1   0  133.79   13.40 
 -11   1   0  126.19   13.00 
 -12  -1   0   42.50    8.80 
 -12  -1   0   34.40    8.20 
 -12   1   0   29.00    8.00 
 -12   1   0   42.00    8.90 
 -13  -1   0   59.29   11.30 
 -13  -1   0   41.80    9.60 
 -13   1   0   37.80   11.00 
 -13   1   0   66.99   12.20 
 -14  -1   0   68.09   12.30 
 -14  -1   0   70.09   15.10 
 -14   1   0   78.29   14.30 
 -14   1   0   79.59   11.30 
 -15  -1   0   19.10    7.40 
 -15  -1   0   18.40    8.50 
 -15   1   0   21.30    7.00 
 -15   1   0   17.70    8.20 
   0   2   0    0.30    0.30 
  -1   2   0  313.57    9.10 
   2  -2   0  595.84   17.00 
  -2  -2   0  632.54   12.90 
  -2  -2   0  612.94   12.90 
   2  -2   0  620.94   17.30 
  -2   2   0  621.64   17.00 
  -2   2   0  593.44   17.10 
  -2   2   0  583.34   16.20 
   2   2   0  628.14   12.90 
   2   2   0  631.54   13.20 
   3  -2   0  104.69    7.50 
  -3  -2   0  116.59    6.40 
   3  -2   0  111.59    7.70 
  -3  -2   0  115.09    5.60 
  -3  -2   0  110.79    5.80 
  -3   2   0  111.89    7.80 
   3   2   0  112.39    5.70 
   3   2   0   98.69    6.60 
  -3   2   0  117.89    8.00 
  -3   2   0  117.99    7.40 
  -4  -2   0   68.09    5.10 
   4  -2   0   70.79    6.70 
  -4  -2   0   69.69    5.50 
   4  -2   0   67.89    6.80 
  -4  -2   0   71.59    5.90 
  -4   2   0   66.39    6.30 
  -4   2   0   72.29    6.70 
  -4   2   0   78.49    7.30 
   4   2   0   74.59    5.70 
  -5  -2   0 2152.88   46.40 
  -5  -2   0 2178.48   43.70 
  -5  -2   0 2151.28   45.40 
   5  -2   0 2165.28   50.29 
   5  -2   0 2179.68   50.59 
  -5  -2   0 2196.58   44.20 
  -5   2   0 2117.39   49.60 
  -5   2   0 2164.78   50.89 
  -5   2   0 2217.98   48.50 
   5   2   0 2157.98   45.20 
   6  -2   0  755.12   28.00 
  -6  -2   0  750.02   24.60 
  -6  -2   0  742.93   23.10 
   6  -2   0  705.33   26.90 
  -6  -2   0  721.83   24.80 
  -6  -2   0  709.03   22.50 
  -6   2   0  743.43   28.00 
   6   2   0  727.93   24.10 
  -6   2   0  761.32   26.20 
  -6   2   0  729.33   27.00 
  -7  -2   0  327.67   17.40 
  -7  -2   0  356.56   16.20 
  -7  -2   0  354.76   16.20 
   7  -2   0  327.77   18.90 
   7  -2   0  360.06   19.70 
  -7  -2   0  338.57   17.10 
  -7   2   0  320.97   17.40 
  -7   2   0  340.17   19.40 
  -7   2   0  350.56   19.10 
   7   2   0  332.47   16.70 
  -8  -2   0    1.40    1.80 
  -8  -2   0   -3.10    1.50 
   8  -2   0   -1.50    1.80 
  -8  -2   0   -5.00    2.20 
   8  -2   0    3.20    2.40 
  -8  -2   0    0.90    2.20 
  -8   2   0    2.80    2.40 
  -8   2   0   -0.10    2.60 
  -8   2   0   -2.30    1.40 
  -8   2   0    2.70    2.80 
  -9  -2   0  128.09   12.10 
   9  -2   0  109.09   12.10 
  -9  -2   0  122.29   13.10 
   9  -2   0  141.09   13.50 
  -9  -2   0  116.59   10.70 
  -9   2   0  120.29   11.80 
  -9   2   0  118.29   15.00 
   9   2   0  123.09   11.50 
  -9   2   0  102.19   11.40 
  -9   2   0  110.29   11.30 
  10  -2   0  113.39   13.40 
  10  -2   0  145.89   14.50 
 -10  -2   0  129.99   11.90 
 -10  -2   0  121.89   12.30 
 -10  -2   0  119.19   12.10 
 -10  -2   0  121.59   11.40 
 -10   2   0  145.29   13.40 
  10   2   0  146.29   13.10 
 -10   2   0  147.79   13.60 
  11  -2   0   44.90   10.30 
 -11  -2   0   45.20    8.50 
  11  -2   0   56.79   11.00 
 -11  -2   0   41.50    8.50 
 -11   2   0   39.90    9.10 
 -11   2   0   45.20    9.80 
 -12  -2   0  309.57   19.90 
 -12  -2   0  334.07   20.80 
  12  -2   0  354.06   25.70 
 -12   2   0  292.77   21.50 
 -12   2   0  290.27   21.80 
 -13  -2   0  157.58   14.90 
 -13  -2   0  176.28   16.10 
 -13   2   0  166.88   16.40 
 -14  -2   0    5.10    5.50 
 -14  -2   0    4.60    5.50 
 -14   2   0   13.80    5.10 
 -14   2   0    9.00    4.90 
 -15  -2   0  133.99   14.70 
 -15  -2   0  134.09   15.30 
 -15   2   0  123.89   15.60 
 -15   2   0  135.39   16.80 
   0  -3   0    6.10    1.30 
   0  -3   0    0.60    0.50 
   0   3   0    1.90    0.80 
   0   3   0    1.70    0.80 
   0   3   0    0.30    0.50 
   1  -3   0 1666.43   32.70 
   1  -3   0 1678.53   32.40 
  -1  -3   0 1701.83   27.70 
  -1   3   0 1577.24   31.10 
  -1   3   0 1701.93   32.30 
   1   3   0 1699.23   27.60 
  -1   3   0 1664.43   31.90 
  -2  -3   0 1227.98   21.80 
   2  -3   0 1180.68   27.90 
  -2  -3   0 1213.18   19.80 
   2  -3   0 1190.48   27.90 
  -2   3   0 1205.28   27.70 
   2   3   0 1218.28   21.90 
  -2   3   0 1224.58   28.40 
  -3  -3   0  349.67   10.10 
   3  -3   0  340.87   14.50 
   3  -3   0  350.56   14.80 
  -3  -3   0  339.37    9.80 
  -3   3   0  324.27   14.30 
   3   3   0  343.57   10.40 
  -3   3   0  362.96   14.60 
   3   3   0  351.46   10.10 
   4  -3   0 4042.90   77.39 
  -4  -3   0 4108.89   67.59 
  -4  -3   0 4182.98   71.09 
   4  -3   0 4130.69   77.99 
  -4  -3   0 4126.29   68.39 
  -4   3   0 4098.39   75.09 
   4   3   0 4065.29   68.39 
   4   3   0 4094.69   68.39 
  -4   3   0 4032.20   76.59 
  -4   3   0 4132.79   78.39 
  -5  -3   0 4243.98   76.29 
  -5  -3   0 4269.47   72.59 
   5  -3   0 4263.37   83.19 
   5  -3   0 4190.78   83.09 
  -5   3   0 4250.67   80.19 
  -5   3   0 4235.98   82.39 
   5   3   0 4256.57   73.99 
  -5   3   0 4231.88   83.89 
   6  -3   0   72.99    8.70 
  -6  -3   0   70.89    6.30 
  -6  -3   0   57.79    6.70 
  -6  -3   0   71.59    6.70 
   6  -3   0   66.79    8.00 
  -6  -3   0   65.19    6.10 
  -6   3   0   73.29    7.90 
   6   3   0   52.09    5.90 
  -6   3   0   68.49    8.40 
  -6   3   0   68.49    8.00 
  -7  -3   0  807.52   24.90 
  -7  -3   0  808.62   25.00 
   7  -3   0  775.92   30.90 
  -7  -3   0  813.02   27.80 
  -7  -3   0  743.63   25.70 
   7  -3   0  763.82   30.90 
   7   3   0  781.22   26.00 
  -7   3   0  765.42   30.10 
  -7   3   0  763.92   29.60 
  -8  -3   0 1300.27   35.70 
   8  -3   0 1341.47   43.90 
   8  -3   0 1273.97   43.60 
  -8  -3   0 1300.97   35.60 
  -8  -3   0 1283.47   37.90 
  -8  -3   0 1296.67   39.30 
   8   3   0 1260.37   37.20 
  -8   3   0 1309.97   40.90 
  -8   3   0 1315.67   44.50 
  -8   3   0 1249.38   42.00 
  -9  -3   0  142.89   11.10 
  -9  -3   0  132.89   10.70 
  -9  -3   0  142.39   12.10 
   9  -3   0  151.08   14.30 
   9  -3   0  130.19   13.70 
  -9  -3   0  147.89   12.30 
   9   3   0  138.69   11.70 
  -9   3   0  145.29   13.60 
  -9   3   0  152.38   13.60 
 -10  -3   0  263.27   18.50 
  10  -3   0  290.57   21.90 
 -10  -3   0  301.17   17.40 
 -10  -3   0  275.37   17.80 
  10  -3   0  290.57   21.20 
 -10  -3   0  289.47   16.90 
 -10   3   0  277.07   19.50 
  10   3   0  311.27   18.80 
 -10   3   0  288.57   19.50 
  11  -3   0  502.95   30.10 
 -11  -3   0  556.44   25.00 
  11  -3   0  528.65   30.10 
 -11  -3   0  540.75   25.00 
 -11  -3   0  486.25   26.70 
 -11   3   0  541.25   28.40 
 -11   3   0  502.45   28.20 
  12  -3   0   37.60   10.00 
 -12  -3   0   49.30    9.40 
 -12  -3   0   46.90    8.90 
 -12   3   0   38.40   10.00 
 -12   3   0   44.30   10.10 
  13  -3   0  165.58   17.80 
 -13  -3   0  167.08   14.70 
 -13  -3   0  154.18   14.90 
 -13   3   0  132.29   16.10 
 -13   3   0  151.78   16.10 
 -14  -3   0  184.58   16.40 
 -14  -3   0  155.88   15.00 
 -14   3   0  185.78   18.10 
 -14   3   0  184.48   18.20 
 -15  -3   0    8.70    5.60 
 -15  -3   0   19.00    6.20 
 -15   3   0    7.20    5.70 
 -15   3   0   20.70    8.50 
   0  -4   0  147.29    5.80 
   0  -4   0  153.78    6.80 
   0   4   0  144.79    5.60 
   0   4   0  148.99    6.50 
   0   4   0  147.29    6.20 
   1  -4   0   24.50    3.00 
  -1  -4   0   23.70    1.60 
  -1  -4   0   23.40    2.30 
   1  -4   0   26.60    3.30 
   1   4   0   23.80    1.40 
  -1   4   0   27.10    3.00 
   1   4   0   26.90    2.30 
  -1   4   0   24.20    3.10 
  -1   4   0   21.40    3.50 
   2  -4   0  225.18   10.80 
  -2  -4   0  176.18    6.30 
  -2   4   0  211.98   10.20 
  -2   4   0  165.38    8.60 
   2   4   0  174.98    6.30 
  -3  -4   0  220.58    7.70 
   3  -4   0  221.28   11.90 
   3  -4   0  216.18   11.90 
  -3  -4   0  224.18    6.70 
   3   4   0  218.78    6.80 
  -3   4   0  234.48   12.00 
   3   4   0  208.88    7.80 
  -3   4   0  223.38   11.20 
  -3   4   0  216.58   12.00 
  -4  -4   0 1747.73   33.40 
  -4  -4   0 1766.12   33.10 
   4  -4   0 1793.22   43.70 
   4  -4   0 1757.32   43.50 
  -4   4   0 1758.62   41.20 
  -4   4   0 1777.72   44.10 
  -4   4   0 1751.62   42.60 
   4   4   0 1731.83   34.20 
   5  -4   0 1053.29   33.40 
  -5  -4   0 1075.39   28.10 
  -5  -4   0 1062.69   25.50 
  -5  -4   0 1053.09   24.90 
   5  -4   0 1049.09   33.80 
   5   4   0 1019.00   25.10 
   5   4   0 1028.60   25.70 
  -5   4   0 1079.69   31.70 
  -5   4   0 1058.69   34.10 
  -5   4   0 1035.50   32.70 
   6  -4   0  345.17   19.10 
  -6  -4   0  352.96   14.60 
  -6  -4   0  340.87   15.70 
  -6  -4   0  353.46   13.80 
  -6  -4   0  357.76   14.00 
   6  -4   0  351.06   19.40 
   6   4   0  351.96   14.50 
  -6   4   0  346.87   18.80 
  -6   4   0  331.67   17.50 
  -6   4   0  362.36   19.80 
  -7  -4   0  119.99    8.50 
  -7  -4   0  117.49    9.00 
  -7  -4   0  123.19    9.90 
  -7  -4   0  119.59    8.40 
   7  -4   0  127.09   12.20 
  -7   4   0  119.29   11.60 
  -7   4   0  124.59   11.10 
  -7   4   0  115.09   11.70 
   7   4   0  110.39    8.70 
   8  -4   0    9.70    4.40 
  -8  -4   0    5.70    3.80 
  -8  -4   0   10.20    3.40 
  -8  -4   0   18.60    5.20 
  -8  -4   0   10.40    3.40 
   8  -4   0    6.80    4.30 
  -8   4   0    9.90    4.10 
  -8   4   0    5.80    3.90 
   8   4   0   19.30    4.70 
  -8   4   0   11.00    4.60 
  -9  -4   0  413.96   20.30 
  -9  -4   0  455.25   19.70 
   9  -4   0  435.56   25.20 
  -9  -4   0  422.36   19.20 
  -9  -4   0  436.36   22.10 
   9  -4   0  384.26   24.60 
  -9   4   0  456.75   25.00 
   9   4   0  427.56   20.40 
  -9   4   0  481.35   24.80 
 -10  -4   0   92.99    9.40 
  10  -4   0  115.69   13.40 
 -10  -4   0  103.69   11.10 
  10  -4   0   83.49   14.40 
 -10   4   0   85.79   11.20 
  10   4   0   86.29   10.20 
 -10   4   0  103.49   12.40 
 -11  -4   0   -3.60    2.00 
 -11  -4   0   -3.70    3.10 
 -11  -4   0    5.60    4.20 
  11  -4   0    6.30    4.00 
 -11  -4   0    0.20    2.40 
 -12  -4   0   34.10    7.10 
  12  -4   0   31.00    9.10 
 -12  -4   0   30.10    6.90 
 -12   4   0   27.30    8.30 
  13  -4   0   -1.20    5.00 
 -13  -4   0    6.80    3.80 
 -13  -4   0    5.10    3.90 
 -13   4   0    4.80    4.10 
 -13   4   0    4.30    4.40 
  14  -4   0    2.20    6.60 
 -14  -4   0    4.90    4.60 
 -14  -4   0   13.50    5.10 
 -14   4   0    7.50    6.10 
 -14   4   0    5.10    5.50 
 -15  -4   0   -2.20    5.80 
 -15   4   0   17.20    7.30 
 -15   4   0   14.00    6.90 
   0  -5   0    1.10    0.90 
   0  -5   0    0.50    0.80 
   0   5   0   -1.00    0.90 
   0   5   0    1.00    1.00 
  -1  -5   0 1429.06   27.50 
  -1  -5   0 1418.26   24.30 
   1  -5   0 1393.36   31.60 
   1  -5   0 1476.05   31.30 
   1   5   0 1421.06   23.40 
  -1   5   0 1437.46   31.40 
   1   5   0 1405.26   26.90 
  -1   5   0 1369.66   29.10 
   1   5   0 1442.86   25.10 
   2  -5   0  665.33   21.30 
   2  -5   0  691.23   21.20 
  -2  -5   0  676.13   15.50 
  -2   5   0  662.93   21.20 
  -2   5   0  641.14   20.40 
  -2   5   0  640.94   19.20 
   2   5   0  670.63   15.20 
   3  -5   0    6.50    2.60 
  -3  -5   0    9.10    2.00 
   3  -5   0    5.40    2.40 
   3   5   0    9.00    2.00 
  -3   5   0   10.30    3.00 
  -3   5   0   10.00    3.30 
  -3   5   0    6.90    2.60 
  -4  -5   0  667.33   14.90 
  -4  -5   0  645.64   16.60 
   4  -5   0  642.64   24.20 
   4  -5   0  641.64   24.60 
   4   5   0  649.83   17.10 
  -4   5   0  646.44   22.50 
   4   5   0  662.83   15.30 
  -4   5   0  650.23   24.70 
  -4   5   0  654.23   24.00 
   5  -5   0 1507.45   42.70 
  -5  -5   0 1538.75   31.70 
  -5  -5   0 1510.35   35.10 
  -5  -5   0 1523.85   30.90 
   5  -5   0 1497.15   42.90 
   5   5   0 1512.65   31.20 
  -5   5   0 1508.45   40.10 
  -5   5   0 1471.35   41.60 
  -5   5   0 1487.85   43.20 
   5   5   0 1516.95   32.90 
  -6  -5   0   35.30    4.70 
   6  -5   0   26.40    6.60 
  -6  -5   0   27.40    3.70 
  -6  -5   0   31.50    5.80 
   6  -5   0   27.70    6.60 
  -6  -5   0   35.60    4.30 
   6   5   0   31.20    4.30 
   6   5   0   29.60    3.90 
  -6   5   0   34.20    7.10 
  -6   5   0   30.80    6.00 
  -6   5   0   25.00    5.60 
  -7  -5   0  370.16   15.70 
  -7  -5   0  364.26   17.40 
   7  -5   0  364.76   21.40 
   7  -5   0  365.76   21.70 
  -7  -5   0  367.56   15.20 
  -7  -5   0  401.36   15.30 
   7   5   0  374.46   15.70 
  -7   5   0  352.96   21.70 
  -7   5   0  356.96   20.60 
  -7   5   0  410.36   21.00 
  -8  -5   0  591.54   24.50 
   8  -5   0  621.04   29.90 
   8  -5   0  596.84   29.90 
  -8  -5   0  607.84   21.10 
  -8  -5   0  591.94   22.40 
  -8  -5   0  625.04   21.80 
   8   5   0  626.04   22.60 
  -8   5   0  630.14   28.00 
  -8   5   0  617.54   30.20 
   9  -5   0   13.50    5.60 
  -9  -5   0    9.80    3.30 
  -9  -5   0   11.80    3.70 
  -9  -5   0   11.50    4.10 
  -9  -5   0   16.80    4.80 
   9  -5   0   18.10    6.30 
   9   5   0   10.70    4.00 
  -9   5   0    9.80    5.00 
 -10  -5   0  258.67   16.00 
 -10  -5   0  238.98   14.90 
  10  -5   0  208.58   18.60 
  10  -5   0  258.67   21.30 
 -10  -5   0  245.58   17.10 
 -10  -5   0  236.58   14.20 
 -10   5   0  269.57   19.50 
 -10   5   0  259.87   20.30 
 -11  -5   0  539.75   25.20 
  11  -5   0  529.05   31.30 
 -11  -5   0  569.24   23.80 
 -11  -5   0  528.65   23.40 
  11  -5   0  558.04   32.70 
 -11  -5   0  466.15   25.30 
 -11   5   0  500.35   28.10 
 -11   5   0  518.45   30.00 
 -12  -5   0   49.10    8.90 
 -12  -5   0   35.90    6.70 
 -12   5   0   21.00    7.20 
 -13  -5   0  165.68   14.40 
 -13  -5   0  177.48   14.10 
  13  -5   0  134.49   18.30 
 -13   5   0  172.18   18.70 
 -13   5   0  171.38   18.20 
 -14  -5   0  165.78   15.40 
 -14  -5   0  164.48   13.90 
  14  -5   0  169.08   20.20 
 -14   5   0  174.58   19.00 
 -14   5   0  160.18   17.80 
 -15  -5   0    4.50    8.00 
 -15  -5   0   10.60    5.30 
  15  -5   0    8.40    6.80 
 -15   5   0   -1.30    4.90 
   0  -6   0  417.46   12.70 
   0  -6   0  430.76   14.50 
   0   6   0  397.66   11.70 
   0   6   0  425.16   13.40 
   0   6   0  381.56   15.90 
   1  -6   0  406.46   14.70 
  -1  -6   0  411.96   13.00 
  -1  -6   0  406.96   10.50 
   1  -6   0  409.86   15.50 
  -1   6   0  381.66   13.30 
   1   6   0  412.36   12.40 
  -1   6   0  397.26   14.80 
   1   6   0  409.96   11.10 
  -1   6   0  389.76   17.60 
   1   6   0  410.86    9.70 
   2  -6   0   78.89    7.10 
  -2  -6   0   80.69    4.90 
   2  -6   0   73.49    6.80 
   2   6   0   82.89    4.80 
  -2   6   0   80.89    7.20 
  -2   6   0   77.09    6.20 
  -2   6   0   74.19    6.70 
   3  -6   0  892.31   28.50 
   3  -6   0  894.81   28.00 
  -3  -6   0  893.91   20.00 
  -3   6   0  893.61   27.70 
   3   6   0  871.51   19.70 
  -3   6   0  877.01   28.20 
  -3   6   0  850.81   25.60 
  -4  -6   0 1283.07   26.40 
   4  -6   0 1263.87   37.60 
   4  -6   0 1248.38   36.80 
   4   6   0 1236.08   26.70 
  -4   6   0 1248.48   37.40 
  -4   6   0 1284.67   34.80 
  -4   6   0 1196.28   35.60 
  -5  -6   0    1.20    0.90 
  -5  -6   0    1.10    1.20 
   5  -6   0    3.70    2.50 
   5  -6   0   -0.30    1.90 
  -5  -6   0   -0.40    1.10 
  -5   6   0   -1.90    1.00 
  -5   6   0   -0.30    1.70 
  -5   6   0    3.50    2.30 
   5   6   0    3.80    1.60 
  -6  -6   0  552.94   20.20 
  -6  -6   0  555.84   16.50 
  -6  -6   0  564.94   16.10 
   6  -6   0  534.85   27.80 
  -6  -6   0  548.35   17.20 
  -6   6   0  518.05   25.60 
  -6   6   0  531.85   24.40 
   6   6   0  548.75   18.40 
   6   6   0  536.55   16.50 
  -6   6   0  556.14   26.40 
  -7  -6   0   43.70    5.10 
  -7  -6   0   52.09    7.80 
  -7  -6   0   41.30    4.60 
   7  -6   0   42.20    9.20 
   7  -6   0   53.49   10.80 
  -7  -6   0   49.40    5.20 
  -7   6   0   35.80    7.40 
   7   6   0   50.29    5.80 
   7   6   0   45.70    5.30 
  -7   6   0   38.40    8.00 
  -7   6   0   49.40    9.20 
  -8  -6   0  790.22   24.90 
  -8  -6   0  786.52   28.30 
  -8  -6   0  797.42   24.70 
  -8  -6   0  806.92   23.80 
   8  -6   0  788.92   35.70 
   8  -6   0  786.42   34.70 
  -8   6   0  837.12   33.20 
   8   6   0  770.92   24.70 
   9  -6   0  495.35   28.90 
  -9  -6   0  424.36   17.70 
   9  -6   0  466.75   27.50 
  -9  -6   0  456.65   19.10 
  -9  -6   0  463.35   19.80 
  -9  -6   0  488.75   22.60 
  -9   6   0  505.95   26.50 
  10  -6   0  125.49   14.60 
 -10  -6   0  136.09   11.00 
  10  -6   0  133.89   14.80 
 -10  -6   0  106.89    9.10 
 -10   6   0  145.79   14.60 
  11  -6   0  108.39   14.40 
 -11  -6   0   79.19    8.40 
 -11  -6   0   82.19   12.60 
 -11   6   0   64.79   12.50 
 -11   6   0   77.79   13.10 
 -12  -6   0  685.73   26.50 
 -12  -6   0  692.93   27.90 
  12  -6   0  667.83   39.50 
 -12  -6   0  664.13   28.70 
 -12   6   0  687.93   36.90 
  13  -6   0   20.30    8.60 
 -13  -6   0   32.20    7.20 
 -13  -6   0   22.80    6.20 
 -13   6   0   14.50    7.40 
 -13   6   0   21.70    8.30 
 -14  -6   0   63.99   10.60 
 -14  -6   0   71.59    9.10 
  14  -6   0   86.89   18.50 
 -14   6   0   49.50   11.60 
 -14   6   0   68.29   13.80 
 -15  -6   0   39.80    8.70 
 -15  -6   0   50.29    9.00 
  15  -6   0   45.00   12.70 
 -15   6   0   46.20   11.50 
 -15   6   0   54.29   11.30 
   0  -7   0    0.50    1.30 
   0   7   0    0.90    1.20 
   0   7   0    0.10    0.90 
   0   7   0    2.10    1.10 
   1  -7   0    7.80    2.90 
  -1  -7   0    6.20    2.20 
  -1  -7   0    5.90    1.60 
   1   7   0    6.50    1.80 
  -1   7   0    7.80    2.50 
   1   7   0    7.00    2.20 
  -1   7   0    4.90    2.20 
  -1   7   0    4.40    1.80 
  -2  -7   0  167.48    7.90 
   2  -7   0  171.98   11.10 
  -2  -7   0  162.08    5.20 
   2  -7   0  167.68   10.70 
  -2   7   0  149.69    9.30 
   2   7   0  162.28    4.60 
   2   7   0  162.98    5.50 
  -2   7   0  149.39   10.30 
   2   7   0  156.58    7.30 
  -2   7   0  160.78   10.40 
   3  -7   0   30.70    6.00 
   3  -7   0   43.50    7.50 
  -3  -7   0   34.60    3.50 
   3   7   0   33.80    3.40 
  -3   7   0   48.70    7.80 
  -3   7   0   23.30    4.80 
  -3   7   0   33.90    6.10 
   4  -7   0    0.90    2.30 
   4  -7   0    5.30    3.10 
  -4  -7   0    4.70    1.70 
  -4   7   0   -1.40    1.60 
  -4   7   0    3.70    2.40 
  -4   7   0    2.00    1.90 
  -5  -7   0  133.49    7.40 
   5  -7   0  139.69   12.30 
   5  -7   0  135.89   12.00 
  -5   7   0  143.99   11.90 
  -5   7   0  133.19   12.00 
  -5   7   0  124.39   10.50 
   5   7   0  127.49    7.50 
  -6  -7   0   41.80    3.70 
  -6  -7   0   37.50    4.40 
   6  -7   0   46.40    9.70 
   6  -7   0   23.70    6.20 
  -6  -7   0   38.60    3.60 
  -6  -7   0   40.00    6.60 
   6   7   0   40.30    3.90 
  -6   7   0   29.40    7.00 
   6   7   0   40.90    4.70 
  -6   7   0   38.30    7.80 
  -6   7   0   38.40    7.40 
   7  -7   0   20.60    6.70 
  -7  -7   0   20.00    3.60 
  -7  -7   0   16.10    3.80 
   7  -7   0   22.50    6.70 
  -7  -7   0   20.70    4.90 
   7   7   0   16.20    4.00 
  -7   7   0   15.20    4.60 
  -7   7   0   20.30    5.90 
   7   7   0   17.30    3.80 
  -8  -7   0   22.50    4.20 
  -8  -7   0   24.70    5.30 
   8  -7   0   13.70    5.00 
  -8  -7   0   23.50    4.20 
  -8  -7   0   17.80    4.00 
   8  -7   0   22.60    7.80 
  -8   7   0   18.90    5.80 
  -9  -7   0   43.10    7.90 
  -9  -7   0   37.90    5.40 
  -9  -7   0   43.40    5.70 
   9  -7   0   38.80    9.40 
  -9  -7   0   35.70    4.80 
   9  -7   0   32.70    8.40 
  -9   7   0   46.00    9.50 
  10  -7   0   22.60    7.80 
 -10  -7   0   29.60    5.40 
 -10  -7   0   26.00    4.90 
 -10  -7   0   28.20    5.90 
  10  -7   0   12.30    6.10 
 -10   7   0   35.60    9.00 
 -11  -7   0    4.70    2.80 
 -11  -7   0    0.30    3.10 
 -11  -7   0    8.80    3.00 
 -11  -7   0    9.00    4.50 
  11  -7   0    2.70    4.80 
 -11   7   0    8.80    5.00 
 -11   7   0    4.80    6.60 
  12  -7   0   16.30    6.60 
 -12  -7   0   -1.60    2.40 
 -12  -7   0    2.30    2.70 
 -12  -7   0   -7.70    3.40 
 -12   7   0    4.70    4.50 
 -12   7   0    0.80    3.80 
  13  -7   0   64.49   14.00 
 -13  -7   0   63.39   10.70 
 -13  -7   0   48.90    8.00 
 -13  -7   0   49.50    8.90 
 -13   7   0   26.60    8.70 
 -13   7   0   45.80   11.80 
 -14  -7   0   -2.70    3.50 
  14  -7   0    1.30    5.40 
 -14  -7   0   -2.10    3.70 
 -14   7   0    5.10    4.70 
 -14   7   0    4.70    5.80 
  15  -7   0   18.50    8.40 
 -15  -7   0    3.20    3.60 
 -15  -7   0   -0.60    4.00 
 -15   7   0   12.30    9.10 
 -15   7   0    2.80    6.80 
   0  -8   0  534.55   18.60 
   0   8   0  500.25   17.10 
   0   8   0  489.35   14.70 
   1  -8   0  233.48   12.80 
  -1  -8   0  221.68   10.60 
  -1   8   0  216.28   11.70 
   1   8   0  220.88   10.00 
   1   8   0  214.88    9.00 
   1   8   0  206.58    7.50 
  -1   8   0  207.78   11.50 
  -1   8   0  210.08   10.40 
   2  -8   0  617.14   23.20 
   2  -8   0  590.84   21.80 
  -2  -8   0  607.84   17.80 
   2   8   0  620.24   17.20 
  -2   8   0  589.24   20.10 
   2   8   0  592.74   13.90 
  -2   8   0  593.54   21.90 
   2   8   0  607.04   12.10 
  -2   8   0  600.24   22.50 
   3  -8   0 1716.43   44.20 
  -3  -8   0 1711.33   34.40 
   3  -8   0 1710.93   45.20 
  -3   8   0 1681.23   43.50 
  -3   8   0 1669.53   41.10 
   3   8   0 1655.93   33.30 
  -3   8   0 1633.34   44.20 
   4  -8   0  889.01   32.90 
  -4  -8   0  961.80   23.00 
   4  -8   0 1005.60   33.50 
  -4   8   0  921.31   33.00 
   4   8   0  926.91   22.60 
  -4   8   0  934.21   31.90 
  -4   8   0  908.41   29.80 
  -5  -8   0    2.40    1.60 
   5  -8   0   -1.30    1.60 
  -5   8   0    4.60    2.90 
  -5   8   0    2.20    2.30 
   5   8   0    1.00    1.40 
   6  -8   0 1723.53   51.59 
   6  -8   0 1700.43   52.39 
  -6  -8   0 1757.82   36.60 
   6   8   0 1683.83   37.60 
  -6   8   0 1637.84   49.80 
  -6   8   0 1727.83   48.30 
  -6   8   0 1695.73   52.59 
   7  -8   0  405.66   23.90 
  -7  -8   0  358.86   11.70 
  -7  -8   0  331.47   16.40 
   7  -8   0  357.96   23.30 
  -7  -8   0  364.86   11.60 
  -7  -8   0  356.96   14.20 
   7   8   0  346.17   15.20 
  -7   8   0  349.27   20.70 
   8  -8   0    2.00    3.00 
  -8  -8   0    4.40    2.30 
  -8  -8   0    5.60    2.30 
  -8  -8   0    2.30    2.60 
  -8  -8   0   -2.70    1.60 
   8  -8   0    3.00    3.70 
   8   8   0    0.90    2.00 
  -8   8   0    0.70    3.00 
  -9  -8   0 1223.08   31.00 
  -9  -8   0 1484.95   42.30 
  -9  -8   0 1242.68   34.70 
  -9  -8   0 1458.65   34.40 
   9  -8   0 1419.66   53.99 
   9  -8   0 1531.55   53.89 
  -9   8   0 1484.05   49.40 
  10  -8   0  133.79   16.30 
 -10  -8   0  102.79    7.80 
  10  -8   0  137.09   15.80 
 -10  -8   0  139.89    9.90 
 -10  -8   0  136.29   10.30 
 -10  -8   0  157.38   12.90 
 -10   8   0  149.69   15.30 
 -11  -8   0   51.49    6.20 
 -11  -8   0   31.40    6.10 
  11  -8   0   24.40    8.20 
 -11  -8   0   37.10    5.10 
 -11  -8   0   41.30    7.70 
 -11   8   0   25.50    8.10 
 -12  -8   0  368.06   19.00 
 -12  -8   0  362.16   23.90 
 -12  -8   0  382.56   18.90 
 -12  -8   0  349.57   17.00 
  12  -8   0  402.66   30.70 
 -12   8   0  364.86   25.90 
 -12   8   0  402.06   29.00 
 -13  -8   0  111.39   14.40 
  13  -8   0  139.39   18.80 
 -13  -8   0   94.59    9.00 
 -13  -8   0  101.39   10.10 
 -13   8   0   70.59   15.40 
 -13   8   0  100.19   16.80 
  14  -8   0   13.70    7.30 
 -14  -8   0   10.70    4.30 
 -14  -8   0   14.90    3.40 
 -14   8   0   -4.10    5.90 
 -14   8   0   15.60    7.60 
 -15  -8   0   12.10    5.60 
  15  -8   0    8.30   14.50 
 -15  -8   0   28.10    5.90 
 -15   8   0   38.40   11.20 
 -15   8   0   16.70    6.80 
   0  -9   0   -0.20    1.40 
   0   9   0    1.80    1.40 
   0   9   0   -0.40    0.90 
   0   9   0    0.70    1.40 
   1  -9   0  433.16   18.80 
  -1  -9   0  433.86   16.40 
  -1   9   0  428.86   17.60 
   1   9   0  412.86   14.00 
   1   9   0  420.16   15.30 
  -1   9   0  412.66   15.30 
  -1   9   0  428.16   17.70 
   1   9   0  409.96   11.90 
  -2  -9   0  571.54   18.30 
   2  -9   0  544.45   22.80 
   2   9   0  556.14   12.40 
  -2   9   0  557.84   22.20 
   2   9   0  548.25   16.90 
  -2   9   0  538.35   21.40 
   2   9   0  565.34   14.40 
  -2   9   0  549.05   19.90 
   3  -9   0  195.18   13.40 
   3  -9   0  188.28   13.70 
  -3  -9   0  189.38    9.50 
  -3   9   0  180.88   12.90 
   3   9   0  188.08    9.00 
  -3   9   0  198.38   12.30 
  -3   9   0  171.78   13.00 
   4  -9   0  452.65   22.30 
   4  -9   0  444.06   22.80 
  -4  -9   0  441.16   14.90 
   4   9   0  432.76   14.50 
  -4   9   0  435.46   22.20 
  -4   9   0  440.66   20.20 
  -4   9   0  436.36   25.50 
   5  -9   0  144.29   13.40 
  -5  -9   0  138.49    8.00 
   5  -9   0  130.99   12.40 
  -5   9   0  120.99   11.50 
  -5   9   0  124.29   12.20 
  -5   9   0  133.99   11.40 
   5   9   0  124.19    7.70 
   6  -9   0   31.20    8.00 
  -6  -9   0   46.00    4.80 
   6  -9   0   39.10    9.20 
   6   9   0   47.00    5.20 
  -6   9   0   53.09   10.60 
  -6   9   0   48.00    8.50 
  -6   9   0   40.40   10.10 
  -7  -9   0  369.06   14.80 
   7  -9   0  368.86   24.20 
   7  -9   0  368.76   23.50 
  -7  -9   0  370.46   17.20 
  -7   9   0  347.37   21.10 
   7   9   0  391.46   16.00 
  -8  -9   0  436.56   12.80 
  -8  -9   0  442.56   13.30 
  -8  -9   0  387.76   16.00 
   8  -9   0  478.75   29.50 
   8  -9   0  435.16   26.90 
  -8  -9   0  421.36   19.70 
  -8   9   0  450.75   25.10 
   8   9   0  419.16   18.10 
   9  -9   0   -2.40    3.80 
  -9  -9   0    4.30    2.70 
   9  -9   0    4.30    4.50 
  -9  -9   0    3.10    2.50 
  -9  -9   0    2.40    2.20 
  -9  -9   0    8.40    3.80 
  -9   9   0    0.50    3.50 
 -10  -9   0   29.80    5.40 
 -10  -9   0   21.00    3.80 
 -10  -9   0   19.20    4.00 
 -10  -9   0   19.00    5.60 
  10  -9   0   13.40    7.10 
 -10   9   0   17.10    7.10 
 -11  -9   0  204.48   13.20 
 -11  -9   0  239.58   16.60 
 -11  -9   0  222.58   12.50 
 -11  -9   0  224.28   11.30 
  11  -9   0  261.67   23.00 
  12  -9   0    3.50    5.00 
 -12  -9   0    4.90    4.60 
 -12  -9   0   -0.80    2.20 
 -12  -9   0    1.60    3.40 
 -12  -9   0   -4.50    2.60 
 -12   9   0   -1.00    4.30 
 -12   9   0   -6.30    3.80 
  13  -9   0  125.79   21.50 
 -13  -9   0  150.38   12.20 
 -13   9   0  137.39   17.80 
 -13   9   0  157.18   17.50 
  14  -9   0  115.79   21.50 
 -14  -9   0  111.89   11.10 
 -14  -9   0  109.79    9.20 
 -14   9   0  121.19   17.10 
 -14   9   0  162.88   17.70 
 -15   9   0   -7.50    4.40 
   0 -10   0  199.98   12.20 
   0  10   0  198.88   11.40 
   0  10   0  198.78    9.50 
   0  10   0  198.18   11.00 
   1 -10   0   85.09    8.70 
  -1 -10   0   79.89    7.50 
   1  10   0   82.29    6.80 
   1  10   0   88.99    5.40 
  -1  10   0   95.09    7.30 
  -1  10   0   83.19    7.80 
  -1  10   0   86.19    7.90 
   1  10   0   94.39    9.00 
  -2 -10   0  122.49    8.50 
   2 -10   0  119.69   10.70 
  -2  10   0  106.99    8.70 
   2  10   0  105.09    7.40 
  -2  10   0  110.99    9.70 
   2  10   0  110.19    5.00 
   2  10   0  120.19    6.50 
  -2  10   0  129.69   10.60 
   3 -10   0  310.07   18.60 
  -3 -10   0  343.07   13.90 
  -3  10   0  342.77   18.90 
   3  10   0  328.07   13.00 
  -3  10   0  326.47   18.00 
  -3  10   0  339.77   16.80 
   4 -10   0  699.83   30.20 
  -4 -10   0  716.03   20.80 
  -4  10   0  678.23   30.80 
   4  10   0  682.73   19.80 
  -4  10   0  706.53   28.80 
   5 -10   0   41.70    9.20 
   5 -10   0   40.60    8.30 
  -5 -10   0   40.40    4.70 
   5  10   0   32.90    4.20 
  -5  10   0   40.20    8.30 
  -5  10   0   42.70    8.10 
  -5  10   0   33.40    6.90 
  -6 -10   0   12.90    3.40 
   6 -10   0    8.80    4.80 
   6 -10   0    9.60    4.70 
   6  10   0   18.70    4.00 
  -6  10   0   12.50    4.70 
   7 -10   0  487.25   28.70 
  -7 -10   0  455.25   16.90 
   7 -10   0  480.45   27.40 
   7  10   0  481.25   18.30 
  -7  10   0  494.95   25.60 
  -8 -10   0    2.10    2.10 
   8 -10   0   12.80    6.20 
   8 -10   0   -0.30    2.90 
  -8 -10   0    1.20    2.70 
  -8  10   0    1.10    2.90 
   8  10   0    3.00    2.70 
  -9 -10   0  187.98    7.70 
   9 -10   0  194.78   20.00 
  -9 -10   0  224.78   14.20 
  -9 -10   0  164.98   10.60 
  -9  10   0  216.98   18.70 
 -10 -10   0   47.60    7.60 
 -10 -10   0   38.70    4.40 
 -10 -10   0   35.30    4.10 
 -10 -10   0   47.70    6.20 
  10 -10   0   35.80   10.80 
 -10  10   0   26.70    8.80 
 -11 -10   0   22.90    4.90 
  11 -10   0   14.10    6.60 
 -11 -10   0   16.90    5.30 
 -11 -10   0   21.20    3.60 
 -11 -10   0   22.40    4.10 
 -11  10   0   10.80    6.70 
 -12 -10   0   42.30    6.60 
 -12 -10   0   37.50    5.80 
 -12 -10   0   33.20    4.80 
  12 -10   0   35.70   11.60 
 -12 -10   0   35.60    7.80 
 -12  10   0   44.20   11.60 
 -13 -10   0   21.70    5.30 
 -13 -10   0   12.30    3.60 
  13 -10   0   23.00    8.60 
 -13  10   0    9.00    6.70 
 -13  10   0    9.40    7.50 
  14 -10   0   -7.00    6.80 
 -14 -10   0   13.30    4.80 
 -14  10   0   15.50   10.60 
 -14  10   0   10.20    6.00 
   0 -11   0   -2.20    1.50 
   0  11   0    0.70    1.40 
   0  11   0    4.50    1.90 
   0  11   0   -1.10    1.90 
  -1 -11   0 3789.12   74.09 
   1 -11   0 3883.11   79.19 
   1  11   0 3785.62   68.89 
   1  11   0 3855.71   71.39 
  -1  11   0 3872.01   76.39 
  -1  11   0 3716.13   75.39 
   1  11   0 3848.72   63.89 
  -1  11   0 3788.22   70.29 
   2 -11   0 3381.16   74.99 
  -2 -11   0 3413.06   66.09 
  -2  11   0 3422.26   72.09 
  -2  11   0 3412.86   73.39 
   2  11   0 3437.26   59.29 
   2  11   0 3429.46   54.79 
   2  11   0 3375.16   63.49 
  -2  11   0 3396.56   67.39 
  -3 -11   0   62.59    6.30 
   3 -11   0   67.29    9.30 
   3  11   0   55.59    5.70 
  -3  11   0   55.89    7.30 
  -3  11   0   68.89    8.30 
  -3  11   0   49.50    8.40 
  -4 -11   0 1794.32   39.30 
   4 -11   0 1781.52   53.19 
  -4  11   0 1751.02   51.99 
  -4  11   0 1791.62   47.50 
   4  11   0 1750.02   38.00 
  -4  11   0 1682.73   49.50 
  -5 -11   0  648.84   20.40 
   5 -11   0  610.64   30.30 
   5 -11   0  627.14   29.50 
  -5  11   0  624.34   26.90 
  -5  11   0  643.04   31.30 
   5  11   0  622.74   19.60 
   6 -11   0    6.00    3.90 
   6 -11   0    0.30    3.30 
  -6 -11   0    4.40    2.50 
   6  11   0    2.80    2.00 
  -6  11   0   11.60    4.70 
   7 -11   0  325.37   23.90 
  -7 -11   0  294.87   13.40 
   7  11   0  317.87   14.60 
  -7  11   0  349.07   21.60 
  -8 -11   0  854.21   26.30 
  -8 -11   0 1005.40   31.90 
   8 -11   0 1117.49   47.70 
  -8  11   0 1019.80   40.50 
   8  11   0 1033.10   29.70 
  -9 -11   0  158.08   12.20 
   9 -11   0  140.79   17.10 
  -9 -11   0  131.89    9.30 
   9  11   0  133.89   10.30 
  -9  11   0  133.99   15.20 
  10 -11   0   29.40   10.50 
 -10 -11   0   17.30    6.00 
 -10 -11   0   35.40    6.00 
 -10  11   0   21.30    6.30 
 -11 -11   0  415.46   27.30 
  11 -11   0  422.56   32.00 
 -11 -11   0  468.55   34.80 
 -11  11   0  426.76   28.10 
  12 -11   0  114.99   16.30 
 -12 -11   0   80.79    8.50 
 -12 -11   0   92.49   11.30 
 -12  11   0   98.79   16.50 
  13 -11   0   30.10   10.70 
 -13 -11   0   55.19    7.80 
 -13  11   0   67.59   14.40 
 -13  11   0   41.80   10.70 
 -14 -11   0  184.68   13.30 
  14 -11   0  177.58   22.50 
 -14  11   0  169.48   19.10 
 -14  11   0  172.48   21.60 
   0 -12   0 1588.54   42.80 
   0  12   0 1531.05   39.30 
   0  12   0 1529.35   34.70 
   0  12   0 1537.95   39.80 
   1 -12   0  228.38   15.50 
  -1 -12   0  241.28   14.30 
  -1  12   0  236.58   14.50 
  -1  12   0  225.18   12.20 
   1  12   0  244.58   12.30 
   1  12   0  242.88   12.90 
  -1  12   0  225.88   14.20 
   1  12   0  223.78    9.80 
  -2 -12   0  434.56   18.60 
  -2  12   0  441.36   18.90 
   2  12   0  444.46   15.00 
  -2  12   0  440.86   21.60 
   2  12   0  435.76   17.30 
  -2  12   0  456.05   22.20 
   2  12   0  439.16   12.30 
   3 -12   0  323.97   20.20 
  -3 -12   0  327.37   15.20 
   3  12   0  295.47   13.60 
  -3  12   0  291.07   20.40 
  -3  12   0  309.77   20.70 
  -3  12   0  302.97   18.10 
  -4 -12   0   -1.20    1.90 
   4 -12   0   -5.00    2.50 
  -4  12   0    1.10    2.50 
  -4  12   0   -3.20    1.60 
   4  12   0    1.90    1.50 
  -5 -12   0   57.19    6.00 
   5 -12   0   49.20   10.40 
   5  12   0   56.89    5.60 
  -5  12   0   57.59   10.20 
  -6 -12   0  465.25   17.50 
   6 -12   0  504.25   29.60 
  -6  12   0  504.75   25.80 
   6  12   0  496.75   18.10 
  -7 -12   0  109.09    8.00 
   7 -12   0   90.59   15.80 
  -7  12   0  110.99   13.30 
   7  12   0  120.49    8.80 
  -8 -12   0    8.30    3.70 
   8 -12   0    2.80    4.80 
  -8 -12   0   -2.70    1.50 
  -8  12   0    1.60    3.60 
   8  12   0   10.20    3.40 
  -9 -12   0  158.98   10.30 
   9 -12   0  168.78   19.50 
  -9 -12   0  174.68   12.70 
   9  12   0  181.88   11.90 
  -9  12   0  173.48   17.40 
 -10 -12   0  325.47   15.50 
  10 -12   0  300.57   27.10 
 -10 -12   0  303.27   17.80 
 -10  12   0  321.47   23.50 
  11 -12   0   -0.10    4.00 
 -11  12   0    8.10    5.00 
  12 -12   0   -0.40    8.40 
 -12 -12   0   15.80    4.60 
 -12  12   0   26.20    9.00 
  13 -12   0  115.09   19.70 
 -13 -12   0  116.49   10.20 
 -13  12   0  130.39   26.40 
 -13  12   0  143.99   19.40 
  14 -12   0    5.90    8.20 
 -14  12   0   -2.90    5.60 
 -14  12   0   -1.30    5.10 
   0 -13   0    1.10    2.70 
   0  13   0    1.30    1.90 
   0  13   0    3.50    2.50 
   0  13   0   -2.00    2.40 
  -1 -13   0  555.94   23.30 
   1  13   0  580.04   21.70 
   1  13   0  554.04   16.80 
  -1  13   0  551.94   28.00 
   1  13   0  560.34   20.20 
  -1  13   0  579.74   24.20 
  -1  13   0  551.64   20.30 
   2 -13   0  243.28   17.40 
  -2 -13   0  269.77   15.00 
   2  13   0  246.48   13.30 
  -2  13   0  252.17   14.20 
  -2  13   0  222.28   15.20 
   2  13   0  263.37   14.80 
   2  13   0  251.37    9.20 
  -2  13   0  254.17   16.60 
   3 -13   0   17.60    6.10 
  -3 -13   0   17.30    4.10 
  -3  13   0    9.90    3.60 
  -3  13   0    7.30    3.60 
  -3  13   0   16.70    5.00 
   3  13   0   14.00    3.70 
  -4 -13   0  136.59    9.90 
   4 -13   0  131.19   14.20 
  -4  13   0  136.69   11.90 
   4  13   0  136.99    9.10 
  -4  13   0  144.79   14.20 
  -5 -13   0    9.90    3.20 
   5 -13   0    5.90    4.90 
   5  13   0    7.00    2.90 
  -5  13   0   15.30    4.90 
  -6 -13   0   90.79    7.50 
   6 -13   0   81.89   14.50 
  -6  13   0  129.59   13.00 
   6  13   0   84.59    7.70 
  -7 -13   0   43.10    5.50 
   7 -13   0   62.79   12.60 
   7  13   0   63.09    6.90 
  -7  13   0   53.29   10.60 
  -8 -13   0   74.19    7.10 
   8 -13   0   98.49   17.30 
  -8  13   0  106.49   13.40 
   8  13   0  106.49    8.90 
  -9 -13   0  109.19    8.70 
  -9 -13   0  100.99    9.60 
   9 -13   0  103.69   19.30 
   9  13   0   97.29    8.90 
  -9  13   0  109.49   13.70 
 -10 -13   0    2.50    2.60 
  10 -13   0    3.70    4.20 
 -10 -13   0   11.20    4.50 
 -10  13   0    9.80    5.30 
  11 -13   0   44.70   13.00 
 -11 -13   0   45.10   10.90 
 -11  13   0   42.50   10.20 
 -12 -13   0   23.20    5.30 
  12 -13   0   10.10    8.00 
 -12  13   0   23.50    8.30 
 -13 -13   0   22.40    5.30 
  13 -13   0    3.40    7.90 
 -13  13   0   34.30    9.40 
 -13  13   0   17.70    9.30 
   0  14   0 1869.71   47.20 
   0  14   0 1869.21   49.50 
   0  14   0 1886.71   41.30 
   1 -14   0   88.89   10.30 
  -1 -14   0   88.69    9.70 
   1  14   0   88.39    7.90 
  -1  14   0   95.69    9.60 
   1  14   0   97.39    8.80 
  -1  14   0   83.89    8.00 
   1  14   0   98.09    6.80 
  -1  14   0  101.79   10.00 
   2 -14   0  305.77   20.00 
  -2 -14   0  328.37   17.50 
  -2  14   0  303.57   20.10 
   2  14   0  316.67   15.60 
   2  14   0  301.57   10.70 
   2  14   0  303.67   13.20 
  -2  14   0  323.07   21.80 
  -2  14   0  317.67   18.70 
  -3 -14   0 1552.94   40.90 
   3 -14   0 1485.55   49.80 
  -3  14   0 1498.85   48.20 
   3  14   0 1483.05   37.70 
  -3  14   0 1499.95   42.30 
   4 -14   0   79.89   14.00 
  -4 -14   0   93.49    8.40 
   4  14   0   67.79    6.70 
  -4  14   0   63.09    8.60 
  -5 -14   0  195.38   12.10 
   5 -14   0  220.08   19.90 
   5  14   0  221.08   11.90 
  -5  14   0  245.38   17.00 
  -6 -14   0  693.03   24.10 
   6 -14   0  830.12   40.40 
  -6  14   0  836.12   34.40 
   6  14   0  794.02   24.90 
  -7 -14   0   91.69    8.00 
   7 -14   0   95.89   17.00 
   7  14   0  117.79    9.10 
  -7  14   0  117.69   13.30 
  -8 -14   0    5.60    2.70 
   8 -14   0   -1.90    5.20 
   8  14   0    2.20    3.10 
  -8  14   0    2.90    4.20 
  -9 -14   0  307.67   17.10 
  -9 -14   0  318.87   15.30 
   9 -14   0  298.97   26.60 
   9  14   0  310.67   15.80 
  -9  14   0  337.87   24.10 
 -10 -14   0  163.08   10.50 
 -10 -14   0  121.49   11.30 
  10 -14   0  126.89   22.10 
 -10  14   0  127.49   15.90 
 -11 -14   0    7.40    4.50 
  11 -14   0    7.90    6.70 
 -11  14   0   -1.40    4.20 
 -12 -14   0  164.58   11.90 
  12 -14   0  111.69   19.80 
 -12  14   0  160.88   17.90 
  13 -14   0  105.09   19.70 
 -13  14   0  128.09   17.20 
   0 -15   0   -4.10    2.80 
   0  15   0   -2.50    2.50 
   0  15   0    1.60    1.90 
   0  15   0    1.80    2.70 
  -1 -15   0   60.19   12.00 
   1 -15   0   94.99   10.80 
  -1  15   0   82.29    9.10 
   1  15   0   77.79    7.90 
  -1  15   0   75.29    9.00 
   1  15   0   66.89    7.30 
   1  15   0   75.19    6.20 
  -1  15   0   82.19    8.10 
  -2 -15   0  137.19   11.40 
   2 -15   0  137.69   13.70 
   2  15   0  138.39    9.00 
  -2  15   0  126.69   12.20 
  -2  15   0  135.89   10.90 
   2  15   0  114.39    9.60 
   2  15   0  130.39    7.10 
   3 -15   0  439.06   25.80 
  -3 -15   0  394.26   19.40 
   3  15   0  373.86   17.10 
  -3  15   0  367.96   23.30 
  -3  15   0  384.16   19.80 
   3  15   0  359.26   10.80 
  -4 -15   0   89.59    8.60 
   4 -15   0   87.79   12.50 
  -4  15   0  106.69   10.80 
   4  15   0   81.69    7.60 
   5 -15   0  694.63   36.50 
  -5 -15   0  553.04   22.50 
   5  15   0  690.03   23.10 
  -5  15   0  706.13   30.40 
   6 -15   0  195.68   20.10 
  -6 -15   0  129.49   10.10 
   6  15   0  168.58   10.90 
  -6  15   0  164.58   15.00 
  -7 -15   0   77.59    7.60 
  -7  15   0   85.79   11.30 
   7  15   0   96.99    8.30 
   8 -15   0  151.08   18.60 
  -8 -15   0  158.18   10.70 
   8  15   0  160.28   11.30 
  -8  15   0  169.18   16.50 
  -9 -15   0   67.39    7.40 
  -9 -15   0   68.89    8.40 
   9 -15   0   71.99   16.30 
  -9  15   0   60.59   11.50 
   9  15   0   85.39    8.40 
 -10 -15   0   34.30    6.70 
  10 -15   0   17.50    8.50 
 -10 -15   0   48.50    6.20 
 -10  15   0   42.30    9.90 
  11 -15   0   85.49   17.60 
 -11 -15   0  104.09   10.10 
 -11  15   0   92.19   13.10 
  12 -15   0    6.60    9.90 
 -12  15   0    2.50    6.00 
  13 -15   0   -9.40    6.10 
 -13  15   0   -8.40    3.90 
   0 -16   0  128.99   13.10 
   0  16   0  127.99    9.10 
   0  16   0  154.58   11.80 
   0  16   0  125.69   11.30 
  -1 -16   0  197.98   15.10 
   1 -16   0  202.78   16.40 
   1  16   0  202.98   10.20 
   1  16   0  194.68   13.10 
   1  16   0  172.28   12.00 
  -1  16   0  199.78   17.60 
  -1  16   0  188.28   12.80 
  -2 -16   0   29.30    5.90 
   2 -16   0   32.80    8.10 
   2  16   0   23.30    4.90 
   2  16   0   31.50    4.50 
  -2  16   0   24.50    5.70 
   2  16   0   21.90    3.80 
  -2  16   0   17.40    5.70 
  -3 -16   0  254.47   17.10 
   3 -16   0  255.37   20.30 
   3  16   0  281.97   11.00 
  -3  16   0  275.47   17.00 
   3  16   0  261.57    9.10 
   4 -16   0   67.29   13.10 
  -4 -16   0   54.89    7.10 
   4  16   0   62.69    7.10 
  -4  16   0   53.69    9.30 
   5 -16   0  317.77   25.00 
  -5 -16   0  266.27   15.20 
   5  16   0  274.77   14.50 
  -5  16   0  301.97   19.60 
   6 -16   0   44.40   12.40 
  -6 -16   0   38.30    6.50 
   6  16   0   31.00    5.80 
  -6  16   0   50.19    9.90 
   7 -16   0   66.19   15.20 
  -7 -16   0   71.99    7.80 
   7  16   0   72.59    7.70 
  -7  16   0   68.59   13.10 
  -8 -16   0    5.90    3.40 
   8 -16   0   -0.10    4.50 
   8  16   0    9.40    3.90 
  -8  16   0   13.00    5.80 
  -9 -16   0   80.29    8.90 
   9 -16   0   86.79   16.60 
  -9 -16   0   90.79    8.40 
  -9  16   0   83.69   14.20 
   9  16   0   65.39    8.20 
 -10 -16   0   -5.50    2.80 
  10 -16   0   -4.10    5.10 
  10  16   0   -3.50    4.20 
 -10  16   0    8.50    4.60 
  11 -16   0   45.40   12.20 
 -11 -16   0   60.19    7.40 
 -11  16   0   42.80   10.90 
  12 -16   0  105.69   19.70 
 -12  16   0  122.89   15.90 
   0 -17   0    2.90    2.90 
   0  17   0   -1.40    2.90 
   0  17   0   -0.20    1.70 
  -1 -17   0  177.08   14.60 
   1 -17   0  217.88   17.60 
  -1  17   0  174.48   11.90 
   1  17   0  161.48   12.70 
  -1  17   0  154.18   13.60 
   1  17   0  177.38    9.90 
   1  17   0  169.88   12.10 
   2 -17   0  386.76   25.50 
  -2 -17   0  412.26   21.80 
  -2  17   0  401.06   19.80 
   2  17   0  402.86   19.60 
   2  17   0  402.26   13.80 
  -2  17   0  367.16   23.70 
   2  17   0  416.66   17.30 
   3 -17   0   51.69   10.90 
  -3 -17   0   60.49    7.80 
   3  17   0   49.50    7.00 
   3  17   0   45.00    4.00 
  -3  17   0   48.00    8.80 
   4 -17   0  209.68   18.90 
  -4 -17   0  201.78   17.10 
  -4  17   0  186.88   15.10 
   4  17   0  187.48   12.50 
   5 -17   0  398.86   28.90 
  -5 -17   0  418.06   21.00 
  -5  17   0  411.66   23.40 
   5  17   0  383.76   23.60 
  -6 -17   0   16.20    4.50 
   6 -17   0    0.00    6.10 
   6  17   0    2.80    3.50 
  -6  17   0   15.50    5.90 
   7 -17   0   59.39   14.20 
  -7 -17   0   90.59    8.20 
   7  17   0   57.29    8.20 
  -7  17   0   86.49   11.30 
  -8 -17   0  305.87   15.80 
   8 -17   0  294.07   26.90 
   8  17   0  285.37   15.40 
  -8  17   0  296.67   22.20 
  -9 -17   0   23.10    6.20 
   9 -17   0   20.40    9.00 
  -9 -17   0   28.60    5.20 
  -9  17   0    5.10    5.60 
   9  17   0   24.40    6.20 
 -10 -17   0  250.77   14.00 
  10 -17   0  230.98   25.60 
 -10  17   0  258.37   22.60 
 -11 -17   0  177.68   16.70 
  11 -17   0  192.88   23.70 
 -11  17   0  197.58   24.60 
  12 -17   0   -9.30    6.20 
 -12  17   0   13.40    6.80 
   0 -18   0   67.59   11.40 
   0  18   0   65.49    6.80 
   1 -18   0   42.60    9.90 
  -1 -18   0   68.39    9.50 
   1  18   0   52.59    8.70 
  -1  18   0   49.20    8.60 
  -1  18   0   70.89    7.80 
   1  18   0   52.09    5.80 
  -2 -18   0   -0.20    3.20 
   2 -18   0    3.30    4.10 
  -2  18   0    4.70    3.00 
   2  18   0    6.80    3.60 
   2  18   0    0.30    3.00 
   2  18   0    3.70    2.00 
   3 -18   0   11.10    6.00 
  -3 -18   0   -1.60    2.70 
  -3  18   0   -0.70    2.70 
   3  18   0    9.80    3.60 
   4 -18   0    6.20    5.50 
  -4 -18   0   12.00    4.50 
  -4  18   0    7.90    4.60 
   4  18   0    6.10    3.90 
   5 -18   0   26.20    7.50 
  -5 -18   0   14.30    5.00 
   5  18   0   14.80    5.60 
  -5  18   0   36.50    8.60 
  -6 -18   0    3.90    4.00 
   6 -18   0    4.10    5.10 
  -6  18   0    1.30    3.40 
   6  18   0    6.10    3.90 
   7 -18   0    7.00    6.70 
  -7  18   0   10.50    5.20 
  -8 -18   0    2.70    3.00 
   8  18   0   10.70    5.40 
  -9 -18   0   43.90    6.20 
   9 -18   0   36.40   11.30 
  -9  18   0   33.10    9.80 
   9  18   0   43.80   10.80 
  10 -18   0   15.30    9.90 
 -10 -18   0   11.30    4.90 
 -10  18   0    1.80    6.50 
  11 -18   0    4.50    7.40 
 -11  18   0   15.80    6.60 
   0 -19   0    3.70    5.00 
   0  19   0    0.90    2.30 
   0  19   0    0.90    3.90 
   1 -19   0  100.29   13.30 
  -1 -19   0   78.59   11.20 
   1  19   0   83.19    7.20 
  -1  19   0   87.29   12.10 
  -1  19   0   89.19    8.90 
   1  19   0   93.79   10.00 
   2 -19   0   25.80    8.50 
  -2 -19   0   21.70    6.10 
   2  19   0   24.90    4.00 
   2  19   0   27.40    5.50 
  -2  19   0   29.90    6.20 
   3 -19   0   29.30    8.80 
  -3 -19   0   40.60    8.30 
  -3  19   0   29.20    6.80 
   4 -19   0   64.59   15.00 
  -4 -19   0   57.69    8.20 
  -4  19   0   70.29   11.70 
   4  19   0   65.09    8.80 
  -5 -19   0  167.78   13.50 
   5 -19   0  165.38   19.00 
  -5  19   0  129.29   14.30 
   5  19   0  143.79   11.50 
   6 -19   0   29.60   11.70 
  -6 -19   0   53.09    8.60 
   6  19   0   42.10    7.20 
  -6  19   0   48.20    9.80 
   7 -19   0  112.39   20.60 
  -7 -19   0  127.09   11.00 
  -7  19   0  108.59   13.60 
   7  19   0   91.69   10.20 
   8 -19   0  272.37   27.70 
   8  19   0  246.28   21.40 
  -8  19   0  264.47   21.80 
   9 -19   0    5.50    8.60 
  -9  19   0   23.50    7.90 
  10 -19   0  253.07   27.30 
 -10  19   0  260.57   24.00 
  11 -19   0   80.79   17.60 
 -11  19   0   86.29   15.70 
   0 -20   0  106.19   14.00 
   0  20   0   87.89    8.30 
   0  20   0  113.09   12.20 
  -1 -20   0   15.00    6.40 
   1 -20   0   13.30    7.90 
  -1  20   0    9.40    3.60 
   1  20   0   10.80    3.30 
   1  20   0   13.70    5.10 
   2 -20   0   46.70   10.40 
  -2 -20   0   36.90    9.00 
  -2  20   0   36.60    7.40 
   2  20   0   45.10    5.10 
   2  20   0   32.50    6.30 
  -3 -20   0  189.78   16.30 
   3 -20   0  215.88   28.50 
  -3  20   0  210.08   16.00 
   3  20   0  228.48    9.30 
   4 -20   0  106.19   18.90 
  -4 -20   0   74.89   10.10 
  -4  20   0   98.79   11.40 
   5 -20   0   29.70    9.40 
  -5 -20   0   26.70    5.70 
   5  20   0   31.20    8.80 
  -5  20   0   27.90    7.70 
   6 -20   0   50.89   11.90 
  -6 -20   0   64.49    8.20 
  -6  20   0   57.89   11.60 
   6  20   0   52.89    8.50 
   7 -20   0   71.49   15.30 
  -7 -20   0   88.09    9.90 
   7  20   0   61.29    9.00 
  -7  20   0   85.09   14.60 
  -8 -20   0  105.49    9.70 
   8 -20   0   90.29   18.20 
  -8  20   0   90.19   15.30 
   9 -20   0  118.89   23.40 
  -9  20   0  122.39   15.80 
  10 -20   0   39.30   13.40 
 -10  20   0   41.80   10.60 
   0 -21   0   -2.10    4.40 
   0  21   0    1.70    2.70 
   0  21   0   -5.30    4.40 
  -1 -21   0    6.30    5.60 
   1 -21   0    2.50    5.20 
   1  21   0    4.50    3.10 
  -1  21   0    5.00    3.30 
  -2 -21   0    4.90    4.80 
   2 -21   0    6.60    6.70 
   2  21   0    6.00    2.90 
  -3 -21   0   76.29   12.40 
   3 -21   0   73.79   14.90 
  -3  21   0   78.99   10.50 
   4 -21   0   42.90   11.40 
  -4 -21   0   49.70    9.30 
  -4  21   0   40.80   11.10 
  -5 -21   0  149.88   13.70 
   5 -21   0  125.09   17.70 
  -5  21   0  160.08   15.40 
  -6 -21   0   31.20    6.30 
   6 -21   0   13.10    6.50 
  -6  21   0    5.10    6.80 
   7 -21   0   14.70    7.70 
  -7 -21   0   13.70    4.50 
  -7  21   0    2.60    5.20 
  -8 -21   0   29.80    6.50 
  -8  21   0   50.99   11.40 
   9 -21   0   35.40   10.50 
   0 -22   0  209.08   20.20 
   0  22   0  195.28   12.90 
   1 -22   0   50.19   11.20 
  -1 -22   0   54.79   12.10 
   1  22   0   25.50    8.40 
  -1  22   0   47.10    8.30 
   2 -22   0   -1.80    5.90 
  -2 -22   0    6.30    6.00 
   2  22   0    0.40    2.70 
  -2  22   0    4.20    4.30 
   2  22   0   -3.00    4.00 
  -3 -22   0  641.74   32.80 
   3 -22   0  623.94   38.70 
  -3  22   0  724.93   30.70 
   4 -22   0  131.79   21.00 
  -4 -22   0  166.88   16.00 
  -4  22   0  161.28   14.90 
  -5 -22   0   -4.80    4.70 
   5 -22   0    6.40    7.00 
  -5  22   0   -3.70    4.50 
   6 -22   0  278.57   26.70 
  -6 -22   0  287.57   19.00 
  -6  22   0  235.88   20.10 
   7 -22   0  238.88   25.60 
  -7 -22   0  193.58   15.10 
  -7  22   0  208.18   19.50 
   8 -22   0   11.90    8.40 
  -8  22   0   -6.30    6.00 
   0 -23   0   -7.80    5.40 
   0  23   0    3.70    3.70 
   1 -23   0  210.78   21.20 
  -1 -23   0  242.58   21.60 
   1  23   0  200.58   17.00 
  -1  23   0  275.87   16.70 
   1  23   0  236.98   13.20 
  -2 -23   0  410.26   27.50 
   2 -23   0  372.56   29.40 
   2  23   0  395.76   22.60 
   2  23   0  408.76   15.60 
  -2  23   0  392.26   21.40 
   3 -23   0   35.40   12.40 
  -3 -23   0   61.19   13.00 
  -3  23   0   48.80   16.30 
   4 -23   0   75.49   15.10 
  -4 -23   0   58.49   11.90 
  -4  23   0   77.29   12.20 
   5 -23   0   23.00    9.10 
  -5 -23   0   35.20    9.00 
  -5  23   0   18.60    8.00 
  -6  23   0   -1.50    4.80 
  -7 -23   0   11.90    6.20 
   7 -23   0   -2.50    6.80 
  -7  23   0   26.10    7.90 
   0 -24   0   44.90   12.00 
   0  24   0   35.00    6.60 
  -1 -24   0  -11.00    5.00 
   1 -24   0    8.20    7.40 
  -1  24   0   -4.20    4.10 
   1  24   0   -4.20    3.80 
  -2 -24   0   10.90   13.70 
   2 -24   0    8.10    8.20 
  -2  24   0    2.10    5.70 
   2  24   0   11.80    4.40 
   3 -24   0    7.00    5.90 
  -3  24   0    1.00    4.80 
   4 -24   0   20.40    8.20 
  -4 -24   0   13.70    7.60 
  -4  24   0   14.00    5.50 
  -5 -24   0   11.70    6.70 
   5 -24   0    8.00    6.70 
  -5  24   0    5.80    5.40 
   6 -24   0    6.90    7.50 
  -6 -24   0   -2.00    5.70 
  -6  24   0   -7.70    5.10 
   0 -25   0   12.90    7.60 
   0  25   0   -2.20    3.90 
  -1 -25   0  243.08   23.20 
   1 -25   0  242.38   25.50 
  -1  25   0  252.27   16.40 
   1  25   0  263.67   14.20 
  -2 -25   0  257.17   21.20 
   2 -25   0  216.88   23.50 
  -2  25   0  218.88   26.40 
   2  25   0  199.88   18.40 
  -3 -25   0   12.00    8.10 
   3 -25   0    6.00    6.70 
  -3  25   0    4.60    5.60 
   4 -25   0  217.98   24.30 
  -4 -25   0  188.38   19.40 
  -4  25   0  191.88   17.60 
   0  26   0   61.99    9.40 
   1 -26   0   46.20   13.40 
  -1 -26   0   56.19   13.50 
  -1  26   0   59.99    9.70 
  -2 -26   0    2.70    9.40 
   2 -26   0  -16.30    6.60 
  -2  26   0   -3.00    5.60 
 -16   0   1    3.60    4.80 
 -16   0   1    7.00    6.60 
 -15   0   1   -4.50    4.00 
 -15   0   1   -1.60    4.60 
 -14   0   1   -4.00    3.90 
  13   0  -1   -1.00    4.20 
 -13   0   1    3.50    4.00 
 -13   0   1   -2.80    4.50 
 -12   0   1    0.90    4.00 
  12   0  -1    2.00    3.80 
 -12   0   1    3.90    3.40 
 -11   0   1    2.70    3.30 
  11   0  -1    2.00    2.90 
  11   0  -1    0.40    2.90 
 -11   0   1    0.30    2.90 
 -10   0   1   -5.60    3.20 
  10   0  -1   -0.70    3.10 
  10   0  -1   -0.70    3.20 
 -10   0   1    0.50    2.10 
 -10   0   1    1.90    2.30 
   9   0  -1    1.90    2.30 
  -9   0   1    0.20    1.90 
  -9   0   1    1.10    2.00 
  -9   0   1    8.40    2.70 
  -9   0   1    3.10    2.60 
  -8   0   1   -0.20    1.90 
  -8   0   1    4.20    2.50 
  -8   0   1    1.00    1.50 
  -8   0   1    3.50    2.20 
   8   0  -1   -0.10    2.10 
  -7   0   1    1.00    1.50 
  -7   0   1   -1.10    1.80 
   7   0  -1   -0.90    1.90 
  -7   0   1    0.90    1.80 
  -6   0   1    0.20    1.70 
  -6   0   1    0.40    1.90 
   6   0  -1   -0.20    1.40 
   6   0  -1   -2.30    1.30 
  -5   0   1    0.10    1.50 
  -5   0   1    1.70    1.80 
   5   0  -1    2.00    1.80 
   5   0  -1   -0.30    1.80 
   4   0  -1   -0.60    0.90 
  -4   0   1    1.10    1.40 
  -4   0   1    0.50    1.20 
  -3   0   1    0.60    0.90 
   3   0  -1   -0.40    0.80 
  -3   0   1    0.70    0.90 
   3   0  -1   -0.90    0.80 
  -2   0   1   -1.10    0.50 
  -2   0   1    0.40    0.50 
   2   0  -1    0.20    0.70 
   1   0  -1    0.00    0.30 
   1   0   1    0.20    0.40 
  -1   0  -1    0.20    0.20 
   1   0   1    0.10    0.30 
   2   0   1    0.30    0.70 
  -2   0  -1   -0.60    0.60 
  -2   0  -1   -0.50    0.60 
   2   0   1    1.30    0.90 
  -2   0  -1   -0.20    0.70 
  -2   0  -1    0.60    0.70 
   2   0   1   -0.70    0.60 
  -3   0  -1    2.10    1.40 
  -3   0  -1    1.00    0.90 
   3   0   1   -1.40    0.70 
   3   0   1    3.10    2.10 
   3   0   1   -1.70    0.80 
  -3   0  -1    0.10    1.00 
  -3   0  -1   -1.10    0.80 
  -4   0  -1    1.20    1.40 
   4   0   1    0.80    1.50 
  -4   0  -1    0.30    1.10 
  -4   0  -1    1.80    1.30 
   4   0   1   -2.50    1.10 
  -4   0  -1    0.90    1.30 
  -5   0  -1    1.50    1.60 
  -5   0  -1    2.10    1.90 
  -5   0  -1    0.20    1.90 
   5   0   1   -1.20    1.60 
   5   0   1   -0.10    1.90 
  -5   0  -1    4.80    2.30 
  -6   0  -1    3.10    2.00 
   6   0   1   -1.70    1.50 
  -6   0  -1    3.10    2.20 
  -6   0  -1    3.10    1.80 
  -6   0  -1   -1.30    1.70 
   6   0   1    4.60    2.20 
  -7   0  -1   -1.10    1.60 
   7   0   1    0.00    1.60 
  -7   0  -1   -2.30    1.40 
  -7   0  -1    2.10    2.20 
  -7   0  -1   -0.90    1.20 
  -8   0  -1    0.90    3.40 
   8   0   1   -0.40    1.40 
   8   0   1    1.30    2.70 
  -8   0  -1    3.70    2.90 
  -8   0  -1    1.00    1.70 
  -9   0  -1   -1.50    2.50 
  -9   0  -1    0.90    1.90 
  -9   0  -1   -1.60    2.30 
 -10   0  -1    6.70    3.10 
 -10   0  -1   -1.60    2.30 
 -11   0  -1    4.00    2.70 
 -11   0  -1   11.60    4.60 
 -12   0  -1    5.10    4.10 
 -12   0  -1    0.40    3.30 
 -13   0  -1    4.70    3.90 
 -13   0  -1   -1.40    3.50 
 -14   0  -1    2.70    4.10 
 -14   0  -1    3.50    4.60 
 -15   0  -1    2.20    5.30 
 -15   0  -1   -1.50    4.60 
 -16  -1   1    3.00    5.50 
 -16  -1   1    5.60    5.40 
 -16   1   1   16.60    6.20 
 -16   1   1    1.30    4.90 
 -15  -1   1  142.19   15.50 
 -15  -1   1  123.29   14.20 
 -15   1   1  137.69   15.80 
 -15   1   1  111.29   15.30 
 -14  -1   1  287.07   20.80 
 -14   1   1  314.57   23.00 
 -14   1   1  289.87   22.50 
 -13  -1   1    5.70    4.50 
 -13  -1   1   10.80    4.60 
  13  -1  -1    8.40    5.70 
 -13   1   1    5.90    5.10 
 -13   1   1    4.00    4.00 
 -12  -1   1  372.56   23.30 
  12  -1  -1  426.96   27.10 
  12  -1  -1  432.76   27.50 
 -12  -1   1  405.46   23.30 
  12   1  -1  446.56   26.70 
 -12   1   1  399.06   24.90 
 -12   1   1  357.46   23.30 
 -11  -1   1  338.37   20.20 
 -11  -1   1  323.47   20.30 
  11  -1  -1  368.56   24.00 
  11  -1  -1  338.07   22.80 
 -11   1   1  315.87   21.10 
 -11   1   1  339.57   21.20 
  11   1  -1  361.26   22.80 
  10  -1  -1   12.30    5.20 
 -10  -1   1   22.20    5.70 
 -10  -1   1   25.20    6.10 
  10  -1  -1   22.00    6.90 
 -10  -1   1   21.10    5.90 
 -10  -1   1   28.30    6.60 
 -10   1   1   32.50    8.00 
 -10   1   1   10.20    5.10 
  10   1  -1   27.70    7.60 
  -9  -1   1  116.49   11.70 
  -9  -1   1  110.39   11.40 
   9  -1  -1  112.39   11.70 
  -9  -1   1  148.09   11.70 
   9  -1  -1  106.89   11.80 
  -9  -1   1  129.79   11.60 
  -9   1   1  138.99   12.40 
   9   1  -1  113.89   11.70 
  -9   1   1  139.79   12.00 
  -9   1   1  115.39   12.60 
   9   1  -1  119.79   11.80 
  -9   1   1  123.09   11.90 
  -8  -1   1   77.29    8.90 
   8  -1  -1   90.89   10.10 
  -8  -1   1   95.79    8.60 
  -8  -1   1   83.89    8.90 
  -8  -1   1   90.89    9.10 
  -8   1   1   86.69    9.20 
  -8   1   1  102.49   10.60 
  -8   1   1   89.69    9.60 
  -8   1   1   83.19   11.00 
   8   1  -1   86.09    9.10 
   8   1  -1   78.29    8.70 
  -7  -1   1   10.70    3.60 
   7  -1  -1   13.70    4.70 
  -7  -1   1   16.80    4.50 
  -7  -1   1   12.30    4.40 
   7  -1  -1   10.00    4.20 
  -7   1   1   18.60    5.00 
  -7   1   1   11.30    4.10 
  -7   1   1   12.70    4.20 
   7   1  -1   12.10    4.20 
   7   1  -1    6.70    3.10 
  -6  -1   1 1316.47   34.80 
   6  -1  -1 1260.37   36.40 
  -6  -1   1 1296.07   32.70 
   6  -1  -1 1307.17   37.80 
  -6  -1   1 1263.57   35.40 
  -6   1   1 1306.67   38.00 
   6   1  -1 1310.17   35.90 
  -6   1   1 1324.97   36.40 
   6   1  -1 1308.97   35.00 
   5  -1  -1 2218.58   48.90 
  -5  -1   1 2234.68   44.50 
   5  -1  -1 2210.08   49.99 
  -5  -1   1 2153.38   47.20 
  -5  -1   1 2210.18   46.20 
  -5   1   1 2213.68   48.20 
   5   1  -1 2171.08   46.20 
   5   1  -1 2205.28   47.70 
  -5   1   1 2182.08   50.09 
  -4  -1   1  917.71   29.10 
  -4  -1   1 1002.10   23.30 
   4  -1  -1  976.90   27.40 
  -4  -1   1  962.70   24.00 
   4  -1  -1  985.20   26.50 
   4   1  -1  950.70   25.30 
  -4   1   1  973.50   25.80 
   4   1  -1  962.10   24.20 
  -4   1   1  972.80   27.40 
  -3  -1   1  992.70   21.40 
   3  -1  -1  963.70   24.90 
  -3  -1   1  982.20   22.80 
   3  -1  -1  934.01   23.50 
  -3   1   1  990.20   23.50 
   3   1  -1  955.90   22.80 
  -3   1   1  916.51   24.50 
  -2  -1   1 1748.93   31.40 
   2  -1  -1 1745.83   34.10 
  -2  -1   1 1734.83   29.40 
   2   1  -1 1709.93   29.40 
   2   1  -1 1744.13   31.70 
  -2   1   1 1771.42   32.60 
  -2   1   1 1793.42   34.30 
   0   1  -1    0.10    0.20 
   2  -1   1 3668.73   59.99 
   2  -1   1 3584.74   62.39 
  -2  -1  -1 3625.44   59.39 
  -2  -1  -1 3753.32   58.19 
  -2  -1  -1 3714.33   56.49 
  -2   1  -1 3655.93   59.49 
  -2   1  -1 3532.65   60.79 
  -2   1  -1 3617.64   62.39 
  -2   1  -1 3796.82   61.79 
   2   1   1 3675.63   56.99 
   2   1   1 3649.23   58.99 
  -3  -1  -1 1091.49   22.30 
  -3  -1  -1 1021.00   23.40 
   3  -1   1 1061.69   25.90 
   3  -1   1 1013.60   28.20 
   3  -1   1 1038.80   26.90 
  -3  -1  -1 1064.29   23.80 
  -3  -1  -1 1022.10   25.40 
   3   1   1 1051.99   24.00 
  -3   1  -1 1035.40   25.40 
   3   1   1 1036.10   23.20 
  -3   1  -1  982.40   30.70 
  -3   1  -1 1060.09   24.40 
  -3   1  -1  992.40   26.40 
   4  -1   1 3426.36   66.19 
  -4  -1  -1 3412.26   64.29 
  -4  -1  -1 3430.86   59.29 
   4  -1   1 3414.56   64.29 
  -4  -1  -1 3426.06   61.09 
  -4   1  -1 3357.96   63.29 
  -4   1  -1 3415.06   65.09 
   4   1   1 3320.87   61.69 
  -4   1  -1 3455.25   62.09 
  -4   1  -1 3333.47   65.59 
   4   1   1 3385.46   61.09 
  -5  -1  -1 1961.20   41.10 
  -5  -1  -1 2006.00   46.00 
   5  -1   1 1949.10   47.30 
   5  -1   1 1965.90   45.70 
  -5  -1  -1 1973.60   42.70 
  -5  -1  -1 1941.21   43.80 
   5   1   1 1940.61   43.00 
  -5   1  -1 1979.80   46.60 
  -5   1  -1 1930.91   44.60 
  -5   1  -1 1988.10   43.50 
  -5   1  -1 1995.70   47.50 
   6  -1   1  161.08   12.50 
  -6  -1  -1  143.09   10.60 
   6  -1   1  148.29   11.30 
  -6  -1  -1  169.98   12.10 
  -6  -1  -1  159.18   10.00 
  -6  -1  -1  131.39    9.60 
  -6   1  -1  131.49   11.30 
  -6   1  -1  151.58   11.70 
   6   1   1  161.78   10.90 
  -6   1  -1  147.69   10.50 
  -6   1  -1  156.38   11.20 
  -7  -1  -1  252.57   15.30 
   7  -1   1  275.37   16.50 
   7  -1   1  251.47   16.50 
  -7  -1  -1  274.37   16.60 
  -7  -1  -1  262.97   14.70 
  -7  -1  -1  259.17   13.90 
  -7   1  -1  298.97   16.40 
  -7   1  -1  276.67   16.90 
  -7   1  -1  268.27   16.80 
  -7   1  -1  278.67   15.40 
   7   1   1  265.87   15.10 
  -8  -1  -1   64.29    7.80 
   8  -1   1   74.29    9.40 
  -8  -1  -1   61.79    8.40 
  -8  -1  -1   57.09    7.00 
  -8  -1  -1   81.59    9.40 
  -8   1  -1   72.69    9.60 
  -8   1  -1   92.29   10.00 
  -8   1  -1   55.69    7.80 
  -8   1  -1   71.09    9.10 
   8   1   1   68.39    8.20 
  -9  -1  -1   31.10    7.00 
   9  -1   1   32.10    8.00 
  -9  -1  -1   40.30    8.40 
  -9  -1  -1   29.30    6.50 
  -9  -1  -1   47.50    8.10 
  -9   1  -1   40.40    7.90 
  -9   1  -1   32.90    8.10 
  -9   1  -1   31.30    7.30 
  -9   1  -1   38.70    8.10 
  10  -1   1  420.86   25.70 
 -10  -1  -1  395.06   20.60 
 -10  -1  -1  430.76   24.30 
 -10  -1  -1  396.26   21.60 
 -10   1  -1  415.86   22.60 
 -10   1  -1  411.66   23.10 
 -11  -1  -1  421.06   23.20 
 -11  -1  -1  411.86   22.00 
 -11   1  -1  418.96   24.40 
 -11   1  -1  395.66   22.80 
 -12  -1  -1   16.30    6.40 
 -12  -1  -1   21.40    6.60 
 -12   1  -1   13.20    5.40 
 -12   1  -1   20.70    6.60 
 -13  -1  -1  136.99   13.50 
 -13  -1  -1  112.49   13.50 
 -13   1  -1  138.59   22.80 
 -14  -1  -1  408.36   25.00 
 -14  -1  -1  402.36   26.20 
 -14   1  -1  444.76   28.20 
 -14   1  -1  396.86   25.30 
 -15  -1  -1    2.40    5.80 
 -15  -1  -1    3.10    4.10 
 -15   1  -1    4.40    5.00 
 -15   1  -1    1.90    4.60 
 -15  -2   1    9.60    6.30 
 -15  -2   1    7.30    5.60 
 -15   2   1   10.90    6.40 
 -15   2   1   -0.20    4.30 
 -14  -2   1   32.70    8.90 
 -14  -2   1   36.50   10.20 
 -14   2   1   37.40    9.30 
 -14   2   1   41.60    9.80 
 -13  -2   1  240.38   18.40 
  13  -2  -1  242.68   21.70 
  13  -2  -1  203.58   20.50 
 -13  -2   1  204.78   16.60 
 -13   2   1  206.48   19.20 
 -13   2   1  211.98   19.00 
 -12  -2   1   89.29   11.10 
 -12  -2   1   76.39    9.30 
  12  -2  -1  103.69   13.30 
  12  -2  -1   71.29   13.00 
  12   2  -1   91.89   11.90 
 -12   2   1   80.69   13.80 
 -12   2   1   84.89   11.90 
 -11  -2   1  130.59   12.10 
  11  -2  -1  128.99   14.50 
  11  -2  -1  127.09   14.20 
 -11  -2   1  127.79   13.50 
 -11  -2   1  123.29   12.30 
  11   2  -1  124.49   13.30 
 -11   2   1  106.49   12.60 
 -11   2   1  117.29   13.30 
 -10  -2   1  694.83   30.20 
  10  -2  -1  716.43   33.70 
 -10  -2   1  710.13   28.80 
 -10  -2   1  677.43   29.30 
 -10  -2   1  689.23   27.40 
  10  -2  -1  663.53   32.30 
 -10   2   1  695.03   30.80 
  10   2  -1  662.63   29.80 
 -10   2   1  701.93   31.20 
  -9  -2   1  443.46   20.30 
   9  -2  -1  442.86   24.70 
  -9  -2   1  456.35   22.30 
  -9  -2   1  452.75   32.80 
   9  -2  -1  448.06   25.00 
   9   2  -1  451.15   23.70 
  -9   2   1  415.76   23.00 
  -9   2   1  454.95   29.50 
  -9   2   1  423.76   22.90 
  -9   2   1  416.26   22.50 
  -8  -2   1   -0.80    1.50 
   8  -2  -1    2.40    2.30 
   8  -2  -1    2.20    2.10 
  -8  -2   1    5.10    2.40 
  -8  -2   1    3.10    2.10 
  -8   2   1    2.30    3.00 
   8   2  -1    2.10    2.10 
  -8   2   1   -0.70    1.50 
  -7  -2   1  683.83   25.20 
   7  -2  -1  675.23   27.90 
  -7  -2   1  662.53   24.30 
  -7  -2   1  673.03   22.50 
   7  -2  -1  626.24   26.60 
  -7   2   1  652.63   26.30 
   7   2  -1  639.04   24.00 
   7   2  -1  658.93   24.70 
  -7   2   1  603.04   26.90 
  -7   2   1  662.63   26.50 
   6  -2  -1 1271.07   38.10 
   6  -2  -1 1317.37   38.00 
  -6  -2   1 1288.77   33.50 
  -6  -2   1 1272.97   31.40 
  -6  -2   1 1262.67   34.20 
  -6   2   1 1265.57   36.50 
  -6   2   1 1308.17   39.00 
   6   2  -1 1250.37   34.20 
   6   2  -1 1294.57   33.70 
   5  -2  -1   23.10    5.30 
  -5  -2   1   24.10    4.30 
  -5  -2   1   23.00    4.10 
   5  -2  -1   21.80    4.90 
  -5  -2   1   21.50    4.00 
  -5   2   1   22.10    4.90 
   5   2  -1   29.30    4.20 
  -5   2   1   19.00    4.90 
   5   2  -1   22.40    4.50 
  -4  -2   1 3073.39   53.99 
   4  -2  -1 3019.30   60.59 
  -4  -2   1 3088.79   52.09 
   4  -2  -1 3019.20   59.59 
  -4  -2   1 3022.90   55.19 
   4   2  -1 3039.10   53.89 
  -4   2   1 2994.40   58.59 
  -4   2   1 3013.30   60.89 
   4   2  -1 2973.20   55.29 
   3  -2  -1 1406.26   32.20 
  -3  -2   1 1470.15   26.20 
  -3  -2   1 1457.65   28.80 
  -3  -2   1 1444.16   27.50 
   3  -2  -1 1415.76   33.50 
   3   2  -1 1419.46   29.00 
  -3   2   1 1424.56   33.50 
   3   2  -1 1462.35   27.50 
   2  -2  -1 6837.22  107.29 
  -2  -2   1 6905.51   99.09 
   2  -2  -1 6734.83  108.29 
  -2  -2   1 7042.50  102.29 
  -2  -2   1 6973.80  100.19 
   2   2  -1 6875.11  102.69 
  -2   2   1 6891.01  106.79 
  -2   2   1 6833.52  108.49 
   1  -2  -1 4396.86   67.79 
  -1   2   1 4425.36   68.49 
  -1   2   1 4086.09   66.89 
   0   2  -1 3503.25   60.09 
   0   2  -1 4309.87   61.99 
   0   2   1 4408.46   61.39 
   1  -2   1  657.03   14.50 
   1  -2   1  606.14   16.30 
   1   2   1  569.34   10.40 
   1   2   1  679.43   13.60 
  -1   2  -1  614.64   16.20 
  -1   2  -1  654.83   15.90 
   2  -2   1 1526.45   30.60 
  -2  -2  -1 1537.15   24.80 
   2  -2   1 1507.55   32.50 
  -2  -2  -1 1543.35   26.10 
  -2  -2  -1 1509.65   27.90 
  -2   2  -1 1485.25   30.00 
  -2   2  -1 1467.95   32.00 
   2   2   1 1540.25   25.40 
   2   2   1 1519.85   28.10 
  -2   2  -1 1494.05   31.80 
   3  -2   1 1182.08   30.20 
   3  -2   1 1156.38   28.20 
  -3  -2  -1 1228.98   24.80 
   3  -2   1 1213.08   29.50 
  -3  -2  -1 1201.18   25.40 
   3   2   1 1168.58   25.60 
  -3   2  -1 1213.48   27.80 
  -3   2  -1 1163.98   29.40 
  -3   2  -1 1164.78   29.70 
   4  -2   1  528.15   19.50 
  -4  -2  -1  533.85   16.50 
  -4  -2  -1  522.15   18.20 
  -4  -2  -1  520.35   14.90 
  -4  -2  -1  524.25   16.40 
   4  -2   1  548.35   20.50 
  -4   2  -1  525.35   18.00 
  -4   2  -1  496.35   19.30 
   4   2   1  513.55   16.60 
   4   2   1  505.25   15.70 
  -4   2  -1  513.15   19.60 
   5  -2   1 1948.80   46.70 
  -5  -2  -1 1982.80   42.60 
  -5  -2  -1 2033.60   40.20 
  -5  -2  -1 1956.00   41.70 
   5  -2   1 1952.40   48.10 
  -5  -2  -1 1977.40   45.30 
  -5   2  -1 1960.60   47.80 
  -5   2  -1 2000.90   46.40 
  -5   2  -1 1969.90   44.40 
   5   2   1 1891.21   42.50 
   5   2   1 1964.40   41.70 
  -5   2  -1 1882.21   47.00 
  -6  -2  -1 4565.34   84.99 
  -6  -2  -1 4671.33   81.59 
   6  -2   1 4550.54   92.19 
  -6  -2  -1 4580.34   88.19 
  -6  -2  -1 4678.03   83.89 
   6  -2   1 4665.53   90.59 
  -6   2  -1 4646.24   86.99 
   6   2   1 4615.74   84.09 
  -6   2  -1 4623.24   91.89 
  -6   2  -1 4675.63   89.49 
  -6   2  -1 4727.93   92.59 
   7  -2   1   57.89   10.10 
   7  -2   1   46.40    8.50 
  -7  -2  -1   35.60    5.00 
  -7  -2  -1   52.49    7.20 
  -7  -2  -1   34.10    5.90 
  -7  -2  -1   42.40    7.10 
  -7   2  -1   45.80    8.30 
  -7   2  -1   43.70    7.80 
   7   2   1   36.70    6.60 
  -7   2  -1   30.00    7.10 
  -7   2  -1   51.09    8.90 
   8  -2   1  695.03   30.90 
  -8  -2  -1  686.63   27.20 
  -8  -2  -1  700.53   24.60 
  -8  -2  -1  691.93   25.80 
   8  -2   1  665.13   28.90 
  -8  -2  -1  703.53   28.90 
  -8   2  -1  678.43   30.10 
  -8   2  -1  682.23   27.20 
  -8   2  -1  684.53   28.40 
  -8   2  -1  686.43   30.10 
  -9  -2  -1 1001.30   33.90 
  -9  -2  -1 1031.70   33.70 
  -9  -2  -1 1071.19   38.40 
   9  -2   1 1078.09   41.10 
  -9  -2  -1 1044.00   37.50 
  -9   2  -1 1032.00   37.40 
  -9   2  -1  880.61   50.09 
  -9   2  -1 1048.00   36.10 
 -10  -2  -1  234.88   16.70 
 -10  -2  -1  236.68   18.40 
 -10  -2  -1  231.58   15.00 
 -10  -2  -1  216.98   15.50 
  10  -2   1  222.78   18.50 
 -10   2  -1  207.48   16.80 
 -10   2  -1  234.38   17.00 
 -11  -2  -1   45.70    8.50 
 -11  -2  -1   35.50    7.60 
  11  -2   1   35.10    9.40 
 -11   2  -1   57.59   11.00 
 -11   2  -1   27.40    7.10 
 -12  -2  -1  498.45   26.30 
 -12  -2  -1  496.05   24.60 
 -12   2  -1  442.96   25.70 
 -12   2  -1  460.95   27.40 
 -13  -2  -1   67.69   12.00 
 -13  -2  -1   66.69   11.40 
 -13   2  -1   41.10    9.50 
 -13   2  -1   49.60   10.70 
 -14  -2  -1   12.50    6.50 
 -14  -2  -1   21.50    6.90 
 -14   2  -1   22.30    8.20 
 -14   2  -1   25.10    7.60 
 -15  -2  -1  108.39   13.70 
 -15  -2  -1  111.69   12.90 
 -15   2  -1  109.59   15.10 
 -15   2  -1  115.09   14.80 
 -15  -3   1    4.50    5.00 
 -15  -3   1    0.70    4.60 
 -15   3   1   -6.70    4.50 
 -15   3   1   -1.10    5.00 
  14  -3  -1  174.88   19.40 
 -14  -3   1  200.08   17.20 
 -14  -3   1  189.38   16.90 
 -14   3   1  204.58   19.70 
 -14   3   1  158.78   17.90 
 -13  -3   1   -5.60    3.60 
  13  -3  -1   -8.50    3.80 
 -13  -3   1    0.00    3.30 
  13  -3  -1   -8.30    7.90 
 -13   3   1    1.70    4.70 
  12  -3  -1   70.79   13.00 
 -12  -3   1   56.59    9.60 
  12  -3  -1   70.39   13.20 
 -12  -3   1   65.09    8.90 
 -12   3   1   45.80   10.80 
 -12   3   1   50.79   11.80 
  12   3  -1   45.00    9.30 
  11  -3  -1   90.89   15.00 
  11  -3  -1   93.69   16.00 
 -11  -3   1   95.49    9.90 
 -11  -3   1   83.19   11.10 
 -11  -3   1   80.29    9.90 
  11   3  -1   91.49   11.10 
 -11   3   1   86.69   11.80 
 -11   3   1   61.29   11.20 
 -10  -3   1    9.00    3.80 
  10  -3  -1    8.50    4.80 
 -10  -3   1    8.60    3.40 
  10  -3  -1   -2.00    2.20 
 -10  -3   1    0.50    2.10 
 -10  -3   1    4.80    3.40 
 -10   3   1    6.90    3.80 
 -10   3   1    2.40    3.10 
  10   3  -1    4.10    3.10 
   9  -3  -1   63.19   11.80 
  -9  -3   1   37.30    7.50 
  -9  -3   1   29.10    6.30 
   9  -3  -1   29.80    8.00 
  -9  -3   1   47.10    6.20 
  -9  -3   1   54.49    9.30 
  -9   3   1   34.70    8.40 
  -9   3   1   39.60    8.60 
   9   3  -1   32.20    7.00 
   8  -3  -1   12.40    4.90 
   8  -3  -1    7.10    3.80 
  -8  -3   1    4.90    2.60 
  -8  -3   1    7.10    3.00 
  -8  -3   1    4.30    2.70 
  -8  -3   1    7.80    3.90 
   8   3  -1   10.20    3.70 
  -8   3   1    6.40    3.60 
  -8   3   1    5.40    3.30 
  -8   3   1   13.80    5.20 
  -7  -3   1    4.30    2.40 
  -7  -3   1    2.50    1.80 
   7  -3  -1   -2.30    2.10 
  -7  -3   1   -0.50    1.50 
   7  -3  -1    1.60    1.70 
  -7   3   1    1.40    2.20 
  -7   3   1    2.60    2.30 
   7   3  -1    0.80    2.00 
   6  -3  -1  198.58   13.90 
  -6  -3   1  180.78   11.00 
  -6  -3   1  195.08   10.00 
   6  -3  -1  191.88   13.90 
  -6  -3   1  192.18   11.20 
  -6   3   1  202.58   13.30 
  -6   3   1  194.38   14.20 
   6   3  -1  187.38   11.20 
  -5  -3   1  859.51   23.80 
   5  -3  -1  862.41   28.60 
   5  -3  -1  910.61   29.90 
  -5  -3   1  919.61   24.70 
  -5  -3   1  881.71   21.70 
  -5   3   1  869.41   28.00 
  -5   3   1  859.61   29.40 
   5   3  -1  866.51   24.30 
   4  -3  -1 1462.25   36.70 
  -4  -3   1 1442.46   27.70 
  -4  -3   1 1419.16   30.20 
  -4  -3   1 1423.26   29.70 
   4  -3  -1 1460.45   37.40 
  -4   3   1 1429.66   35.70 
   4   3  -1 1396.06   30.50 
  -4   3   1 1413.86   37.10 
  -3  -3   1  108.69    4.50 
   3  -3  -1  104.19    7.70 
  -3  -3   1  116.89    5.40 
  -3  -3   1  118.29    5.70 
   3  -3  -1  114.29    8.30 
  -3   3   1  118.89    7.90 
   3   3  -1  108.99    6.70 
   3   3  -1  116.39    4.90 
  -3   3   1  120.99    8.50 
  -2  -3   1  299.37    6.40 
   2  -3  -1  291.07   12.00 
   2  -3  -1  303.67   11.80 
  -2  -3   1  294.47    7.70 
  -2   3   1  294.77   11.40 
   2   3  -1  295.77    8.10 
  -2   3   1  299.57   12.10 
   2   3  -1  291.57    6.50 
  -1  -3   1   71.69    2.90 
  -1  -3   1   72.19    2.90 
   1  -3  -1   69.09    4.90 
   1  -3  -1   75.29    4.90 
   1   3  -1   73.99    2.80 
  -1   3   1   67.89    4.70 
   1   3  -1   75.29    3.00 
  -1   3   1   73.89    4.80 
   0  -3  -1  802.92   16.50 
   0  -3   1  859.21   16.40 
   0  -3   1  837.52   17.40 
   0   3  -1  823.42   17.20 
   0   3  -1  824.22   16.00 
   0   3   1  829.12   16.60 
   0   3   1  829.52   17.60 
   1  -3   1 1013.40   21.50 
  -1  -3  -1  934.51   21.90 
   1  -3   1 1017.70   23.00 
  -1   3  -1  973.10   22.40 
   1   3   1 1037.80   19.80 
  -1   3  -1 1018.20   21.00 
   2  -3   1  915.91   24.40 
  -2  -3  -1  954.90   19.70 
  -2  -3  -1  956.90   16.20 
   2  -3   1  938.11   23.30 
   2   3   1  930.91   19.70 
  -2   3  -1  954.30   24.90 
  -2   3  -1  933.61   24.90 
  -2   3  -1  938.11   22.40 
  -3  -3  -1   88.89    4.00 
  -3  -3  -1   84.99    5.20 
  -3  -3  -1   90.69    4.70 
   3  -3   1   81.79    6.60 
   3  -3   1   89.19    7.10 
   3  -3   1   88.29    7.40 
  -3   3  -1   95.69    7.60 
   3   3   1   82.89    5.40 
  -3   3  -1   78.29    6.10 
  -3   3  -1   99.09    7.70 
   4  -3   1  466.85   18.90 
  -4  -3  -1  463.35   14.80 
  -4  -3  -1  446.76   16.50 
  -4  -3  -1  459.45   12.80 
  -4  -3  -1  459.95   14.20 
   4  -3   1  457.85   19.30 
   4   3   1  453.95   15.20 
  -4   3  -1  476.35   17.60 
  -4   3  -1  482.95   19.50 
  -4   3  -1  448.46   18.90 
  -5  -3  -1  323.37   15.10 
   5  -3   1  304.67   16.30 
   5  -3   1  329.27   17.40 
  -5  -3  -1  332.57   12.10 
  -5  -3  -1  313.37   13.10 
  -5   3  -1  324.17   17.10 
   5   3   1  328.77   12.90 
   5   3   1  315.57   13.70 
  -5   3  -1  317.27   15.30 
  -5   3  -1  317.57   16.90 
  -6  -3  -1  320.87   13.10 
   6  -3   1  311.97   17.50 
  -6  -3  -1  299.47   15.80 
  -6  -3  -1  309.57   14.00 
  -6  -3  -1  293.67   14.00 
   6  -3   1  321.97   18.40 
   6   3   1  309.87   13.80 
  -6   3  -1  303.37   16.10 
  -6   3  -1  285.27   17.20 
   6   3   1  300.27   14.60 
  -6   3  -1  284.17   17.10 
  -7  -3  -1    2.00    2.00 
   7  -3   1    1.90    3.20 
  -7  -3  -1    0.80    2.10 
  -7  -3  -1    3.10    1.90 
   7  -3   1    0.30    2.60 
  -7  -3  -1    6.10    2.60 
  -7   3  -1    2.10    2.50 
  -7   3  -1    1.60    3.10 
  -7   3  -1    6.00    4.90 
  -8  -3  -1  118.49   10.50 
  -8  -3  -1  119.29    9.20 
   8  -3   1  103.09   11.20 
  -8  -3  -1  109.29   10.70 
   8  -3   1  116.19   12.40 
  -8  -3  -1  105.99    9.40 
  -8   3  -1  100.09   10.90 
  -8   3  -1  117.19   12.20 
  -8   3  -1  118.49   11.10 
  -8   3  -1  107.39   11.90 
  -9  -3  -1   82.99    8.20 
  -9  -3  -1   95.29    9.80 
  -9  -3  -1   80.29   12.10 
   9  -3   1   81.59   13.80 
  -9  -3  -1  108.69   10.00 
  -9   3  -1   95.39   10.30 
  -9   3  -1   94.19   10.90 
 -10  -3  -1   12.40    4.20 
 -10  -3  -1    3.00    4.10 
 -10  -3  -1    4.00    3.70 
  10  -3   1   -4.70    2.40 
 -10  -3  -1    1.10    3.70 
 -10   3  -1    6.50    4.60 
 -10   3  -1   12.00    5.50 
 -11  -3  -1   52.89    7.50 
  11  -3   1   50.19   11.00 
 -11  -3  -1   55.79   10.10 
 -11  -3  -1   45.10    8.60 
 -11   3  -1   59.69   10.60 
 -11   3  -1   55.79   11.60 
 -12  -3  -1   17.90    6.00 
  12  -3   1   28.50    9.50 
 -12  -3  -1   24.80    7.30 
 -12   3  -1   21.20    7.10 
 -12   3  -1   22.10    7.40 
 -13  -3  -1    2.70    3.60 
 -13   3  -1   -1.00    3.70 
 -13   3  -1    8.80    4.30 
 -14  -3  -1   -1.30    3.40 
 -14  -3  -1   -8.90    6.60 
 -14   3  -1    2.80    4.80 
 -14   3  -1    5.40    4.70 
 -15  -3  -1    4.40    5.40 
 -15  -3  -1    4.70    5.30 
 -15   3  -1    7.40    5.70 
 -15   3  -1    4.10    5.00 
 -15  -4   1   62.89   11.70 
  15  -4  -1   99.39   17.40 
 -15  -4   1   83.09   11.40 
 -15   4   1   89.49   16.00 
 -15   4   1  109.99   17.80 
 -14  -4   1    4.50    4.30 
  14  -4  -1   -1.80    3.90 
 -14  -4   1   -3.60    4.60 
 -14   4   1   -1.60    4.50 
 -14   4   1   -2.50    3.70 
  13  -4  -1  320.67   26.10 
 -13  -4   1  299.97   20.00 
  13  -4  -1  324.27   25.20 
 -13  -4   1  278.47   18.10 
 -13   4   1  293.87   23.30 
 -13   4   1  301.87   23.40 
 -12  -4   1  702.03   28.70 
 -12  -4   1  702.93   29.90 
  12  -4  -1  765.72   39.60 
  12  -4  -1  708.43   40.90 
  12   4  -1  711.73   32.00 
 -12   4   1  701.93   35.30 
 -11  -4   1   33.50    7.10 
  11  -4  -1   34.00    9.10 
 -11  -4   1   34.30    7.40 
  11  -4  -1   29.00    7.60 
 -11  -4   1   30.60    6.40 
 -11  -4   1   33.00    7.60 
 -11   4   1   28.30    8.00 
 -11   4   1   12.00    5.80 
  11   4  -1   24.70    6.90 
  10  -4  -1  304.97   22.20 
 -10  -4   1  309.57   19.20 
 -10  -4   1  308.37   16.90 
 -10  -4   1  309.67   17.90 
 -10  -4   1  301.97   19.10 
  10  -4  -1  288.37   21.90 
 -10   4   1  324.47   21.50 
  -9  -4   1  902.21   31.50 
  -9  -4   1  935.91   32.50 
   9  -4  -1  955.80   39.10 
   9  -4  -1  949.90   38.90 
  -9  -4   1  929.81   30.90 
  -9  -4   1  937.41   29.30 
   9   4  -1  909.41   32.00 
  -9   4   1  993.20   37.30 
  -8  -4   1   98.59    8.30 
   8  -4  -1  104.09   12.00 
   8  -4  -1  107.29   12.20 
  -8  -4   1  129.99   10.30 
  -8  -4   1  136.99   10.20 
  -8  -4   1  115.19    9.40 
   8   4  -1  124.39   10.30 
  -8   4   1  112.59   11.60 
  -8   4   1  106.69   11.40 
  -8   4   1   88.99   11.30 
  -7  -4   1  881.91   26.90 
   7  -4  -1  793.42   32.20 
   7  -4  -1  825.42   32.90 
  -7  -4   1  848.62   24.20 
  -7  -4   1  820.52   26.50 
   7   4  -1  817.22   26.50 
  -7   4   1  845.92   31.50 
  -7   4   1  849.12   33.70 
  -7   4   1  831.02   46.30 
  -6  -4   1 1701.83   35.50 
  -6  -4   1 1653.53   38.00 
   6  -4  -1 1650.83   46.90 
   6  -4  -1 1640.24   46.40 
  -6  -4   1 1677.13   38.50 
  -6   4   1 1654.13   47.50 
  -6   4   1 1703.83   45.70 
  -6   4   1 1668.33   45.50 
   6   4  -1 1659.83   38.60 
  -5  -4   1    4.90    1.70 
   5  -4  -1    9.10    3.60 
   5  -4  -1    3.20    2.50 
  -5  -4   1    7.30    2.50 
  -5  -4   1    7.70    2.40 
   5   4  -1    4.50    2.20 
  -5   4   1    7.80    3.20 
  -5   4   1    5.80    2.70 
   4  -4  -1 1616.84   41.30 
  -4  -4   1 1607.04   32.00 
   4  -4  -1 1657.13   41.10 
  -4  -4   1 1624.94   31.70 
  -4  -4   1 1611.74   29.60 
  -4   4   1 1640.44   41.80 
   4   4  -1 1593.44   32.50 
  -4   4   1 1621.74   39.80 
   4   4  -1 1628.44   30.60 
  -3  -4   1 1139.09   20.50 
   3  -4  -1 1161.38   30.50 
  -3  -4   1 1112.99   21.60 
   3  -4  -1 1148.89   30.80 
  -3   4   1 1097.89   30.40 
   3   4  -1 1135.09   21.00 
   3   4  -1 1126.09   22.70 
  -3   4   1 1147.99   29.50 
   2  -4  -1   81.79    6.50 
  -2  -4   1   78.49    3.30 
   2  -4  -1   76.69    6.30 
  -2  -4   1   71.59    3.10 
  -2   4   1   78.19    7.20 
   2   4  -1   76.79    3.60 
   2   4  -1   71.09    3.10 
  -2   4   1   76.99    6.00 
   1  -4  -1  286.17   11.10 
  -1  -4   1  287.77    8.10 
   1  -4  -1  270.67   10.60 
  -1  -4   1  295.47    7.30 
   1   4  -1  290.67    7.70 
  -1   4   1  297.87   11.10 
   1   4  -1  289.07    7.20 
  -1   4   1  280.57   10.60 
   0  -4  -1  312.07   10.40 
   0  -4   1  325.27    9.30 
   0  -4  -1  316.07    9.60 
   0   4   1  319.97    9.60 
   0   4   1  326.47   10.40 
   0   4  -1  314.57   10.00 
  -1  -4  -1 2125.89   37.30 
   1  -4   1 2150.68   39.20 
   1  -4   1 2106.49   41.10 
  -1   4  -1 2093.79   38.30 
  -1   4  -1 2121.19   40.70 
   1   4   1 2166.58   32.60 
  -1   4  -1 2085.19   40.50 
   1   4   1 2116.79   37.00 
   2  -4   1   72.69    6.40 
   2  -4   1   81.39    6.10 
  -2  -4  -1   86.59    4.90 
   2   4   1   82.29    4.80 
  -2   4  -1   82.79    6.60 
  -2   4  -1   72.29    6.20 
  -2   4  -1   81.79    5.90 
  -3  -4  -1 1001.30   18.40 
  -3  -4  -1  976.40   21.90 
   3  -4   1 1006.60   28.10 
   3  -4   1  992.30   28.90 
   3  -4   1  930.31   26.60 
  -3  -4  -1 1003.20   17.20 
  -3   4  -1  955.30   27.90 
  -3   4  -1  999.50   26.10 
  -3   4  -1 1009.20   28.70 
   3   4   1  989.70   22.40 
  -4  -4  -1    1.20    1.10 
   4  -4   1   -1.30    1.00 
  -4  -4  -1    0.50    1.10 
   4  -4   1   -0.20    1.20 
  -4   4  -1    0.50    1.30 
   4   4   1   -0.70    1.00 
  -4   4  -1    1.70    2.20 
  -4   4  -1    3.40    1.90 
  -5  -4  -1 1023.20   24.90 
  -5  -4  -1 1065.69   23.20 
   5  -4   1  995.50   32.40 
  -5  -4  -1 1040.30   25.90 
   5  -4   1 1005.90   33.50 
  -5  -4  -1  996.80   28.70 
   5   4   1  996.80   26.60 
  -5   4  -1 1013.40   32.90 
  -5   4  -1  996.30   30.20 
  -5   4  -1  975.50   32.80 
   6  -4   1 1230.48   39.80 
  -6  -4  -1 1233.08   31.00 
   6  -4   1 1239.78   38.80 
  -6  -4  -1 1186.68   34.50 
  -6  -4  -1 1262.87   28.60 
  -6  -4  -1 1202.88   30.60 
  -6   4  -1 1197.68   38.60 
   6   4   1 1225.28   32.50 
  -6   4  -1 1230.48   36.10 
  -6   4  -1 1254.17   40.00 
  -7  -4  -1  336.27   15.70 
  -7  -4  -1  328.67   14.00 
   7  -4   1  346.77   20.80 
  -7  -4  -1  363.16   16.00 
  -7  -4  -1  324.97   17.50 
   7  -4   1  345.07   20.00 
  -7   4  -1  329.97   18.20 
  -7   4  -1  318.27   20.10 
  -7   4  -1  334.37   20.00 
  -8  -4  -1  241.88   14.40 
  -8  -4  -1  243.78   14.00 
  -8  -4  -1  252.17   13.10 
   8  -4   1  281.67   19.00 
  -8  -4  -1  257.57   16.50 
   8  -4   1  223.68   17.90 
  -8   4  -1  258.57   18.10 
  -8   4  -1  238.18   17.90 
  -8   4  -1  248.38   18.30 
  -8   4  -1  245.98   16.50 
  -9  -4  -1  368.96   25.10 
   9  -4   1  356.46   23.90 
  -9  -4  -1  355.66   16.70 
  -9  -4  -1  362.86   18.90 
  -9   4  -1  371.56   21.40 
  -9   4  -1  359.26   22.40 
 -10  -4  -1   -0.30    2.80 
 -10  -4  -1   -2.40    2.00 
 -10  -4  -1    7.60    4.00 
  10  -4   1    2.60    4.20 
 -10   4  -1    4.20    3.40 
 -11  -4  -1  152.38   13.20 
  11  -4   1  150.88   15.70 
 -11  -4  -1  136.29   12.30 
 -11  -4  -1  133.69   11.00 
 -11   4  -1  124.29   14.30 
 -11   4  -1  118.49   13.40 
 -12  -4  -1  460.05   22.20 
  12  -4   1  484.15   36.10 
 -12  -4  -1  451.15   24.00 
 -12   4  -1  495.35   44.60 
 -13  -4  -1    3.20    4.10 
 -13  -4  -1    1.00    3.00 
  13  -4   1    2.40    5.20 
 -13   4  -1    2.10    4.60 
 -13   4  -1    6.80    4.60 
 -14  -4  -1  165.58   15.00 
 -14  -4  -1  184.18   15.90 
 -14   4  -1  164.18   17.50 
 -14   4  -1  158.98   17.10 
 -15  -4  -1   24.90    6.70 
 -15   4  -1   26.10    8.20 
 -15   4  -1   22.70    8.30 
  15  -5  -1   12.10    8.80 
 -15  -5   1   11.60    5.90 
 -15  -5   1   17.30    7.60 
 -15   5   1   35.70    9.50 
 -15   5   1    7.90    6.00 
  14  -5  -1   97.69   18.20 
 -14  -5   1   83.09   10.60 
 -14  -5   1   90.59   10.90 
 -14   5   1   81.69   15.60 
 -14   5   1   51.99   10.60 
 -13  -5   1  142.49   13.20 
 -13  -5   1  118.79   11.80 
  13  -5  -1  148.39   18.40 
 -13   5   1  153.98   17.70 
 -13   5   1  151.18   16.90 
  12  -5  -1    0.10    4.70 
 -12  -5   1    1.10    3.10 
 -12  -5   1    0.40    7.20 
  12  -5  -1   -7.30    5.00 
 -12  -5   1   -1.40    2.90 
 -12   5   1    2.60    4.30 
 -12   5   1   10.00    5.40 
 -11  -5   1  259.27   16.20 
  11  -5  -1  253.27   21.20 
  11  -5  -1  278.67   22.60 
 -11  -5   1  262.97   17.50 
 -11  -5   1  246.38   15.30 
 -11  -5   1  246.48   16.60 
 -11   5   1  271.17   21.80 
  11   5  -1  233.58   16.10 
 -11   5   1  244.78   19.80 
 -10  -5   1   70.19    8.00 
 -10  -5   1   65.29    8.60 
  10  -5  -1   90.89   15.30 
 -10  -5   1   88.59    8.50 
  10  -5  -1   82.39   11.70 
 -10  -5   1   99.29   10.20 
  10   5  -1   80.59    9.20 
 -10   5   1   75.99   10.80 
  -9  -5   1   40.20    7.30 
  -9  -5   1   41.30    7.50 
   9  -5  -1   39.90    9.50 
  -9  -5   1   45.60    7.80 
  -9  -5   1   41.30    5.80 
   9  -5  -1   31.70    8.50 
   9   5  -1   39.40    7.20 
  -9   5   1   34.10    8.20 
  -8  -5   1 1066.69   31.00 
  -8  -5   1 1085.19   32.80 
   8  -5  -1 1057.69   40.40 
  -8  -5   1 1100.79   29.30 
   8  -5  -1 1051.99   40.30 
  -8  -5   1 1027.20   31.00 
  -8   5   1 1053.59   38.00 
  -8   5   1 1047.40   38.70 
   8   5  -1 1067.29   32.00 
   7  -5  -1  447.36   24.00 
   7  -5  -1  445.16   23.80 
  -7  -5   1  445.56   15.90 
  -7  -5   1  422.66   17.00 
  -7  -5   1  421.06   17.70 
   7   5  -1  441.16   17.80 
  -7   5   1  415.46   22.10 
  -7   5   1  442.36   24.40 
  -7   5   1  437.16   22.30 
   6  -5  -1  161.28   13.20 
   6  -5  -1  160.08   13.30 
  -6  -5   1  167.38    9.80 
  -6  -5   1  165.38    9.30 
  -6  -5   1  164.38    8.40 
  -6   5   1  167.88   13.00 
  -6   5   1  180.38   14.10 
  -6   5   1  151.18   12.20 
   6   5  -1  170.28    9.80 
   5  -5  -1 1526.95   43.10 
  -5  -5   1 1548.15   33.20 
  -5  -5   1 1527.55   30.00 
  -5  -5   1 1523.85   31.50 
   5  -5  -1 1524.85   43.00 
  -5   5   1 1490.95   43.20 
   5   5  -1 1498.05   31.10 
  -5   5   1 1478.75   40.90 
  -5   5   1 1490.65   41.20 
   5   5  -1 1555.74   32.80 
  -4  -5   1    3.30    1.30 
   4  -5  -1    6.10    2.90 
   4  -5  -1    3.70    2.20 
  -4  -5   1    2.60    1.10 
  -4   5   1    1.90    2.20 
   4   5  -1    2.30    1.20 
  -4   5   1    9.40    3.00 
   4   5  -1    4.00    1.70 
  -3  -5   1  415.06   10.10 
   3  -5  -1  431.16   17.80 
  -3  -5   1  410.66    9.70 
   3  -5  -1  399.46   17.10 
   3   5  -1  408.76   10.80 
   3   5  -1  404.06   10.20 
  -3   5   1  402.36   17.40 
  -3   5   1  395.56   16.50 
  -2  -5   1 2342.37   36.40 
  -2  -5   1 2354.86   38.10 
   2  -5  -1 2319.77   48.00 
   2  -5  -1 2317.17   47.80 
   2   5  -1 2327.87   37.50 
   2   5  -1 2318.07   37.10 
  -2   5   1 2310.87   47.90 
  -2   5   1 2284.47   46.80 
   1  -5  -1   61.39    5.40 
  -1  -5   1   58.79    3.30 
   1  -5  -1   54.29    5.00 
  -1  -5   1   54.99    4.10 
   1   5  -1   61.59    3.80 
  -1   5   1   61.19    5.20 
   1   5  -1   59.29    3.20 
  -1   5   1   56.69    5.10 
   0  -5   1 2551.84   46.20 
   0  -5   1 2540.95   43.70 
   0  -5  -1 2588.84   46.70 
   0   5  -1 2529.85   45.40 
   0   5   1 2551.74   45.80 
   0   5   1 2576.64   44.50 
   0   5  -1 2554.44   43.00 
  -1  -5  -1 1139.89   19.90 
   1  -5   1 1063.49   26.80 
   1  -5   1 1125.09   25.90 
  -1  -5  -1 1115.29   23.80 
   1   5   1 1101.79   19.00 
   1   5   1 1114.69   19.80 
  -1   5  -1 1070.19   27.10 
   1   5   1 1101.09   23.40 
  -1   5  -1 1111.39   24.40 
  -1   5  -1 1023.30   35.70 
  -2  -5  -1  220.28    8.60 
   2  -5   1  227.18   10.90 
   2  -5   1  225.18   11.90 
   2   5   1  213.08    8.30 
  -2   5  -1  222.08   11.50 
  -2   5  -1  224.78   10.30 
  -2   5  -1  209.88   11.10 
   3  -5   1  273.07   14.40 
  -3  -5  -1  272.27   10.00 
  -3   5  -1  269.17   13.90 
  -3   5  -1  269.57   12.70 
   3   5   1  262.07   10.30 
  -3   5  -1  272.27   14.20 
   4  -5   1   47.60    6.80 
  -4  -5  -1   51.09    3.40 
   4  -5   1   56.39    6.60 
  -4  -5  -1   54.19    3.00 
  -4  -5  -1   52.49    4.60 
   4   5   1   57.89    5.00 
  -4   5  -1   52.09    6.50 
  -4   5  -1   58.39    6.30 
  -4   5  -1   52.99    6.80 
  -5  -5  -1  463.55   15.80 
   5  -5   1  495.15   22.90 
  -5  -5  -1  483.85   12.90 
  -5  -5  -1  471.25   14.20 
   5  -5   1  491.55   22.10 
  -5   5  -1  464.15   21.60 
   5   5   1  461.25   16.50 
  -5   5  -1  481.45   20.10 
  -5   5  -1  442.66   21.60 
  -6  -5  -1   -2.60    1.50 
  -6  -5  -1    1.20    1.30 
   6  -5   1   -1.90    1.50 
  -6  -5  -1    4.50    2.50 
  -6   5  -1    1.00    2.10 
   6   5   1    2.40    1.90 
  -6   5  -1    5.00    2.50 
  -6   5  -1    8.40    4.10 
   7  -5   1  622.94   29.30 
  -7  -5  -1  636.14   19.20 
  -7  -5  -1  627.34   21.10 
  -7  -5  -1  613.44   21.30 
   7  -5   1  646.34   28.70 
  -7  -5  -1  570.84   23.80 
   7   5   1  616.44   22.80 
  -7   5  -1  614.34   28.10 
  -7   5  -1  623.14   29.30 
  -7   5  -1  619.14   26.00 
  -8  -5  -1  564.14   24.90 
  -8  -5  -1  581.64   22.00 
   8  -5   1  595.74   29.00 
  -8  -5  -1  559.24   19.30 
  -8  -5  -1  566.04   21.70 
   8  -5   1  621.94   30.60 
  -8   5  -1  581.74   26.50 
   9  -5   1    8.50    4.50 
  -9  -5  -1    1.60    1.90 
  -9  -5  -1    0.70    2.90 
  -9  -5  -1   -4.90    3.00 
  -9  -5  -1    2.90    1.80 
  -9   5  -1   -0.50    2.30 
  -9   5  -1    2.30    3.60 
 -10  -5  -1  118.29   10.50 
  10  -5   1  120.39   14.60 
 -10  -5  -1  107.89   10.50 
 -10  -5  -1  103.99    8.90 
 -10  -5  -1  148.69   13.50 
 -10   5  -1  140.19   14.50 
 -10   5  -1  116.59   12.90 
 -11  -5  -1    2.60    2.50 
  11  -5   1    4.50    4.00 
 -11  -5  -1   13.50    3.30 
 -11  -5  -1    3.20    4.10 
 -11   5  -1    0.00    3.70 
 -11   5  -1    9.40    4.50 
 -12  -5  -1   65.39    8.90 
  12  -5   1   54.59   12.80 
 -12  -5  -1   71.29   11.50 
 -12  -5  -1   71.19    8.40 
 -12   5  -1   66.79   13.10 
 -12   5  -1   64.59   12.50 
 -13  -5  -1  181.98   15.80 
 -13  -5  -1  192.78   14.00 
  13  -5   1  189.18   20.80 
 -13   5  -1  183.18   17.80 
 -13   5  -1  177.98   19.30 
  14  -5   1   12.20    7.10 
 -14  -5  -1   16.00    6.20 
 -14  -5  -1   -1.60    4.50 
 -14   5  -1    9.70    7.00 
 -14   5  -1   18.20    7.60 
 -15  -5  -1    5.70    4.80 
 -15  -5  -1    2.20    4.00 
 -15   5  -1   -7.90    5.10 
 -15   5  -1    2.30    5.10 
 -15  -6   1    7.80    6.90 
 -15  -6   1   -4.50    3.80 
  15  -6  -1    5.90    7.60 
 -15   6   1    7.80    6.50 
 -15   6   1   -1.80    4.80 
  14  -6  -1    4.90    6.10 
 -14  -6   1   -1.70    3.00 
 -14  -6   1    2.90    3.80 
 -14   6   1   -7.10    4.30 
 -14   6   1   -5.30    4.40 
 -13  -6   1   56.69    9.60 
 -13  -6   1   55.89    7.90 
  13  -6  -1   46.30   13.30 
 -13   6   1   65.99   13.40 
 -13   6   1   38.70   10.40 
 -12  -6   1  144.19   12.90 
 -12  -6   1  129.19   11.30 
  12  -6  -1  165.28   18.10 
 -12  -6   1  127.79   12.40 
  12  -6  -1  145.79   19.80 
 -12  -6   1  114.79   10.70 
 -12   6   1  125.49   15.20 
 -12   6   1  131.29   16.80 
 -11  -6   1   17.40    4.90 
 -11  -6   1    6.60    4.10 
 -11  -6   1   19.30    6.10 
  11  -6  -1   28.70    8.40 
 -11  -6   1   31.30    6.50 
  11  -6  -1   13.80    6.60 
 -11   6   1    9.70    6.00 
 -10  -6   1   18.20    4.90 
 -10  -6   1   20.40    4.40 
 -10  -6   1   28.30    5.50 
  10  -6  -1   30.20    8.70 
  10  -6  -1    9.50    7.00 
 -10  -6   1   26.10    6.10 
  10   6  -1   29.90    6.10 
 -10   6   1   18.90    6.30 
  -9  -6   1  780.52   24.90 
   9  -6  -1  817.62   37.60 
  -9  -6   1  815.02   28.90 
  -9  -6   1  716.63   25.10 
   9  -6  -1  826.02   37.50 
  -9  -6   1  779.62   26.80 
  -9   6   1  823.42   35.00 
   9   6  -1  844.12   28.30 
  -8  -6   1  130.49    8.80 
   8  -6  -1  133.79   14.10 
  -8  -6   1  136.69    9.80 
  -8  -6   1  141.09   10.60 
   8  -6  -1  144.29   14.40 
  -8  -6   1  135.19    9.70 
   8   6  -1  152.68   10.60 
  -8   6   1  135.89   13.20 
  -7  -6   1  507.45   19.30 
  -7  -6   1  509.85   16.80 
   7  -6  -1  503.25   26.00 
   7  -6  -1  516.25   26.40 
  -7  -6   1  515.75   17.90 
  -7   6   1  490.35   24.20 
  -7   6   1  523.25   25.50 
  -7   6   1  518.75   27.00 
   7   6  -1  502.15   18.40 
  -6  -6   1  279.87   10.80 
   6  -6  -1  290.37   21.90 
   6  -6  -1  266.47   18.40 
  -6  -6   1  263.87   12.50 
   6   6  -1  270.57   11.60 
  -6   6   1  283.67   18.30 
  -6   6   1  286.87   20.70 
   6   6  -1  288.47   12.30 
  -5  -6   1  553.14   14.80 
   5  -6  -1  538.35   24.20 
   5  -6  -1  571.84   24.90 
  -5  -6   1  530.05   16.70 
  -5  -6   1  534.25   14.50 
   5   6  -1  538.15   15.80 
   5   6  -1  522.15   15.20 
  -5   6   1  530.15   23.00 
  -5   6   1  557.84   23.20 
  -5   6   1  519.75   24.10 
  -4  -6   1  206.78    7.40 
   4  -6  -1  199.98   13.40 
   4  -6  -1  181.58   12.70 
  -4  -6   1  191.88    6.60 
   4   6  -1  188.18    7.50 
   4   6  -1  190.88    7.70 
  -4   6   1  182.68   12.10 
  -4   6   1  170.68   11.60 
  -4   6   1  182.28   12.80 
   3  -6  -1  111.69    9.20 
   3  -6  -1  100.79    8.80 
  -3  -6   1  108.69    4.10 
  -3   6   1  105.79    8.50 
   3   6  -1  113.69    5.00 
  -3   6   1  118.49    9.40 
  -3   6   1  115.59    9.00 
   3   6  -1  106.39    4.80 
   2  -6  -1  216.08   12.00 
  -2  -6   1  221.58    6.40 
   2  -6  -1  221.78   11.90 
  -2  -6   1  208.28    9.20 
   2   6  -1  234.58    7.60 
   2   6  -1  220.98    6.60 
  -2   6   1  223.88   11.30 
  -2   6   1  220.38   11.50 
  -2   6   1  222.48   12.00 
   1  -6  -1  809.72   23.30 
  -1  -6   1  835.22   17.50 
   1  -6  -1  836.52   22.60 
  -1  -6   1  848.02   19.80 
  -1   6   1  778.32   21.10 
   1   6  -1  801.22   18.60 
   1   6  -1  798.82   18.50 
  -1   6   1  841.52   23.00 
   0  -6  -1 1142.49   24.80 
   0  -6   1 1104.99   26.30 
   0  -6   1 1131.09   24.40 
   0  -6  -1 1135.09   26.90 
   0   6   1 1089.29   23.40 
   0   6  -1 1097.69   23.10 
   0   6  -1 1097.19   25.50 
   0   6   1 1121.69   24.80 
   0   6   1 1140.09   26.10 
  -1  -6  -1   57.19    3.40 
   1  -6   1   64.79    5.40 
  -1  -6  -1   51.69    4.50 
   1  -6   1   56.69    5.60 
  -1   6  -1   52.49    5.40 
   1   6   1   50.09    3.00 
  -1   6  -1   58.09    5.50 
   1   6   1   55.09    3.40 
  -1   6  -1   53.99    4.70 
   2  -6   1    7.80    2.50 
  -2  -6  -1   12.50    2.70 
   2  -6   1    7.60    3.00 
  -2   6  -1   10.30    3.20 
   2   6   1   11.70    3.20 
  -2   6  -1   10.00    3.10 
  -2   6  -1   10.60    2.90 
   3  -6   1   -1.40    0.90 
   3  -6   1    3.50    2.00 
  -3  -6  -1    0.20    0.90 
  -3   6  -1   -0.70    1.10 
   3   6   1    0.00    0.80 
  -3   6  -1   -0.60    1.30 
  -3   6  -1    1.80    1.60 
   4  -6   1  126.19   10.60 
   4  -6   1  123.89   10.70 
  -4  -6  -1  131.39    7.40 
  -4   6  -1  131.39   10.60 
  -4   6  -1  118.69    9.30 
  -4   6  -1  123.19   10.60 
   4   6   1  134.89    7.70 
   5  -6   1   10.80    4.00 
   5  -6   1    5.40    3.20 
  -5  -6  -1   12.70    2.20 
  -5  -6  -1    8.80    2.60 
  -5  -6  -1    7.80    2.00 
  -5   6  -1    5.60    2.50 
   5   6   1   12.70    3.10 
  -5   6  -1    4.20    2.40 
  -5   6  -1   10.90    4.00 
  -6  -6  -1  176.38    9.80 
   6  -6   1  138.19   12.40 
   6  -6   1  148.99   13.30 
  -6  -6  -1  171.78    7.40 
  -6  -6  -1  164.58    8.20 
  -6  -6  -1  167.88   11.30 
   6   6   1  157.28   10.00 
  -6   6  -1  160.88   13.40 
  -6   6  -1  169.98   13.90 
  -6   6  -1  177.58   12.90 
  -7  -6  -1   53.99    4.80 
   7  -6   1   44.20    9.20 
  -7  -6  -1   51.99    8.10 
   7  -6   1   48.50    9.40 
  -7  -6  -1   57.59    5.50 
  -7  -6  -1   64.09    6.30 
   7   6   1   60.19    6.90 
  -7   6  -1   62.79    8.30 
  -7   6  -1   50.79    9.60 
  -7   6  -1   64.89   11.20 
   8  -6   1  145.09   15.00 
  -8  -6  -1  150.98   10.10 
  -8  -6  -1  146.79   10.30 
  -8  -6  -1  134.49    8.50 
  -8  -6  -1  152.18   12.20 
  -8   6  -1  143.09   13.10 
  -9  -6  -1   93.99    8.40 
  -9  -6  -1   85.19   10.20 
  -9  -6  -1   71.89    7.70 
  -9  -6  -1   61.69    6.10 
   9  -6   1   74.99   13.70 
  -9   6  -1   85.69   11.10 
 -10  -6  -1   12.00    4.30 
 -10  -6  -1   11.00    2.70 
 -10  -6  -1    7.20    3.90 
  10  -6   1   21.10    6.40 
 -10  -6  -1   12.70    4.30 
 -10   6  -1    9.50    5.00 
 -10   6  -1   12.90    5.50 
 -11  -6  -1   96.89   10.60 
  11  -6   1   99.89   16.90 
 -11  -6  -1   82.19    9.20 
 -11  -6  -1  112.49   13.80 
 -11   6  -1   79.49   13.80 
 -11   6  -1   94.49   12.60 
 -12  -6  -1   24.00    6.80 
 -12  -6  -1   44.80    6.30 
  12  -6   1   27.70    9.10 
 -12  -6  -1   34.40    7.30 
 -12   6  -1   27.30    8.50 
 -12   6  -1   43.60   10.50 
  13  -6   1   -4.90    4.70 
 -13  -6  -1   -0.90    3.40 
 -13  -6  -1   -1.60    2.50 
 -13   6  -1    7.40    4.60 
 -13   6  -1    1.40    4.60 
 -14  -6  -1   82.29   10.90 
  14  -6   1   53.29   12.60 
 -14  -6  -1   77.89    9.30 
 -14   6  -1   51.09   12.40 
 -14   6  -1   51.79   12.00 
 -15  -6  -1   25.50    5.80 
  15  -6   1   23.50   11.90 
 -15  -6  -1   14.80    5.60 
 -15   6  -1   20.90    7.80 
 -15   6  -1   22.50    8.80 
 -15  -7   1  103.29   11.00 
  15  -7  -1   97.49   17.50 
 -15  -7   1  101.09   10.50 
 -15   7   1   89.29   16.00 
 -15   7   1   94.59   25.30 
 -14  -7   1  374.96   19.90 
  14  -7  -1  338.37   29.20 
 -14  -7   1  357.56   19.80 
 -14   7   1  378.06   27.90 
 -14   7   1  343.17   27.30 
 -13  -7   1  250.17   15.70 
  13  -7  -1  279.37   26.40 
 -13  -7   1  269.67   16.10 
 -13   7   1  246.68   21.90 
 -13   7   1  220.38   21.80 
  12  -7  -1  134.09   16.00 
 -12  -7   1  109.09   10.80 
 -12  -7   1  111.89   10.40 
 -12  -7   1  111.79    9.60 
 -12  -7   1   98.19   11.00 
  12  -7  -1  124.89   20.50 
 -12   7   1  101.79   14.00 
 -12   7   1  131.79   16.40 
 -11  -7   1  401.86   19.80 
 -11  -7   1  442.76   19.80 
  11  -7  -1  408.06   29.20 
 -10  -7   1   73.09    7.40 
  10  -7  -1   86.29   15.40 
  10  -7  -1   69.19   12.90 
 -10  -7   1   73.09    9.10 
 -10  -7   1   82.19    8.40 
 -10  -7   1   77.19    7.20 
  10   7  -1   75.79    8.30 
 -10   7   1  112.69   13.30 
  -9  -7   1   65.49    6.90 
  -9  -7   1   64.39    8.20 
  -9  -7   1   55.89    6.00 
   9  -7  -1   69.39   12.60 
   9  -7  -1   89.89   12.50 
  -9  -7   1   64.09    6.50 
  -9   7   1   59.79   10.80 
   9   7  -1   70.59    7.40 
   8  -7  -1 2172.08   64.49 
  -8  -7   1 2129.59   45.60 
   8  -7  -1 2073.79   62.59 
  -8  -7   1 2151.58   45.90 
  -8  -7   1 2122.29   44.20 
  -8  -7   1 2154.18   49.70 
  -8   7   1 2180.18   60.09 
   8   7  -1 2119.59   46.90 
  -7  -7   1  999.80   24.90 
  -7  -7   1  956.70   28.10 
   7  -7  -1 1027.30   39.30 
  -7  -7   1 1026.40   25.60 
   7  -7  -1 1027.30   39.50 
  -7   7   1  991.20   52.09 
  -7   7   1 1027.90   36.70 
   7   7  -1  994.00   26.60 
  -7   7   1  983.80   37.10 
  -6  -7   1  379.76   12.50 
   6  -7  -1  394.66   22.30 
  -6  -7   1  413.66   15.60 
   6  -7  -1  434.06   23.50 
  -6  -7   1  396.06   13.00 
   6   7  -1  391.16   13.80 
   6   7  -1  388.96   14.00 
  -6   7   1  414.36   21.30 
  -6   7   1  423.76   23.40 
  -6   7   1  391.36   21.10 
  -5  -7   1 1252.17   24.10 
   5  -7  -1 1243.28   40.00 
  -5  -7   1 1293.37   26.30 
   5  -7  -1 1259.27   40.50 
  -5   7   1 1262.17   37.90 
  -5   7   1 1288.77   41.00 
  -5   7   1 1185.28   37.80 
   5   7  -1 1247.68   26.40 
   5   7  -1 1229.08   26.70 
   4  -7  -1 1339.37   39.50 
  -4  -7   1 1347.87   26.20 
  -4  -7   1 1340.07   23.10 
   4  -7  -1 1326.57   39.20 
   4   7  -1 1304.67   26.20 
  -4   7   1 1353.06   39.90 
   4   7  -1 1323.07   25.40 
  -4   7   1 1254.87   36.30 
  -4   7   1 1282.57   37.50 
  -3  -7   1  484.95   13.10 
  -3  -7   1  478.75   10.40 
   3  -7  -1  493.55   20.60 
   3  -7  -1  471.75   20.50 
   3   7  -1  478.25   11.50 
  -3   7   1  463.15   20.30 
  -3   7   1  487.85   20.00 
  -3   7   1  477.45   19.10 
   3   7  -1  474.85   12.60 
   2  -7  -1 2002.00   45.50 
  -2  -7   1 1994.30   33.80 
  -2  -7   1 2060.69   37.50 
   2  -7  -1 2026.60   46.60 
   2   7  -1 2015.30   36.20 
   2   7  -1 2011.80   33.50 
  -2   7   1 2035.00   46.10 
  -2   7   1 1973.40   43.30 
  -2   7   1 1983.40   44.70 
   1  -7  -1  705.43   22.60 
  -1  -7   1  726.03   16.90 
  -1  -7   1  698.83   19.10 
   1  -7  -1  714.03   21.50 
   1   7  -1  715.03   18.20 
   1   7  -1  721.63   15.90 
  -1   7   1  707.33   21.70 
  -1   7   1  703.03   20.10 
  -1   7   1  741.93   22.20 
   0  -7   1  648.54   18.50 
   0  -7  -1  674.23   18.40 
   0  -7  -1  678.83   20.40 
   0  -7   1  714.83   20.60 
   0   7  -1  656.13   16.90 
   0   7   1  663.73   17.20 
   0   7  -1  600.84   21.90 
   0   7   1  693.43   18.80 
   0   7  -1  673.93   19.30 
   0   7   1  655.23   19.40 
   1  -7   1    3.90    2.20 
  -1  -7  -1    7.10    2.30 
   1  -7   1    4.60    2.00 
   1   7   1    5.40    1.30 
   1   7   1   10.90    2.50 
  -1   7  -1    7.40    2.20 
   1   7   1    6.00    1.50 
  -1   7  -1    3.00    1.90 
  -1   7  -1    7.30    2.50 
   2  -7   1  115.89    8.50 
  -2  -7  -1  108.39    6.80 
   2  -7   1  108.49    9.00 
  -2   7  -1  120.09    9.30 
  -2   7  -1  120.39    9.00 
   2   7   1  113.49    6.70 
  -2   7  -1  119.49    8.00 
   3  -7   1  105.39    9.50 
   3  -7   1  112.19    9.20 
  -3  -7  -1  115.39    6.90 
  -3   7  -1   93.09    8.60 
  -3   7  -1  102.69    8.30 
   3   7   1  107.49    6.60 
  -3   7  -1  104.29    9.30 
   4  -7   1  207.58   14.30 
  -4  -7  -1  200.38    9.60 
  -4   7  -1  210.18   14.30 
  -4   7  -1  200.18   12.50 
  -4   7  -1  217.48   14.00 
   4   7   1  196.88    9.60 
   5  -7   1  257.47   17.30 
  -5  -7  -1  253.07   11.40 
  -5   7  -1  270.47   17.40 
  -5   7  -1  259.87   17.40 
   5   7   1  257.47   11.80 
  -5   7  -1  259.77   15.30 
  -6  -7  -1   45.90    3.70 
  -6  -7  -1   46.70    5.10 
   6  -7   1   39.30    8.30 
  -6  -7  -1   48.10    3.40 
  -6   7  -1   48.10    9.10 
  -6   7  -1   34.00    6.50 
   6   7   1   37.10    5.20 
  -6   7  -1   40.90    7.70 
  -7  -7  -1  842.22   20.00 
  -7  -7  -1  825.22   24.90 
  -7  -7  -1  876.11   29.30 
  -7  -7  -1  802.82   21.80 
   7  -7   1  811.82   35.70 
   7   7   1  821.82   26.30 
  -7   7  -1  841.42   32.20 
   8  -7   1  410.76   25.90 
  -8  -7  -1  392.16   20.10 
  -8  -7  -1  365.36   13.30 
  -8  -7  -1  365.76   15.00 
  -8  -7  -1  389.06   16.90 
   8   7   1  377.96   18.30 
  -8   7  -1  396.76   22.50 
  -9  -7  -1  301.47   14.70 
  -9  -7  -1  309.97   19.00 
  -9  -7  -1  262.57   12.20 
  -9  -7  -1  303.17   15.60 
   9  -7   1  327.77   24.50 
  -9   7  -1  304.47   20.70 
 -10  -7  -1  109.49    9.70 
 -10  -7  -1   91.39    7.30 
  10  -7   1  108.89   14.40 
 -10  -7  -1  109.79   11.90 
 -10  -7  -1  102.19    8.90 
 -10   7  -1  138.09   14.40 
 -10   7  -1  117.49   14.60 
 -11  -7  -1  279.77   16.70 
 -11  -7  -1  279.37   14.10 
 -11  -7  -1  282.67   16.40 
 -11  -7  -1  279.77   20.30 
 -11   7  -1  290.77   22.20 
 -12  -7  -1  281.27   17.40 
 -12  -7  -1  291.87   15.20 
  12  -7   1  285.67   25.70 
 -12  -7  -1  250.77   16.60 
 -12   7  -1  286.67   22.00 
 -12   7  -1  320.17   25.10 
  13  -7   1  375.36   30.50 
 -13  -7  -1  429.66   19.40 
 -13  -7  -1  387.96   21.70 
 -13  -7  -1  411.76   21.90 
 -13   7  -1  405.66   26.90 
 -13   7  -1  377.76   28.70 
 -14  -7  -1   95.59    9.50 
 -14  -7  -1  123.89   12.30 
  14  -7   1  114.19   20.70 
 -14   7  -1  104.69   14.10 
 -14   7  -1   97.99   17.80 
 -15  -7  -1   -0.20    4.50 
 -15  -7  -1   -4.00    4.80 
 -15   7  -1    9.60    5.70 
  15  -8  -1  124.09   27.30 
 -15  -8   1   91.69   10.10 
 -15  -8   1   91.49   10.70 
 -15   8   1   97.39   26.10 
 -15   8   1  104.59   18.10 
 -14  -8   1   -6.10    3.50 
  14  -8  -1    0.70    6.60 
 -14   8   1    7.70    5.30 
 -14   8   1    3.60    6.30 
 -13  -8   1  127.39   10.70 
  13  -8  -1  146.09   19.30 
 -13  -8   1  147.19   11.40 
 -13  -8   1  131.89   12.20 
 -13   8   1  137.59   17.40 
 -13   8   1  108.59   15.40 
  12  -8  -1  137.69   18.80 
 -12  -8   1  162.68   11.70 
 -12  -8   1  159.38   13.20 
  12  -8  -1  146.09   17.50 
 -12   8   1  170.78   17.80 
 -11  -8   1   18.00    4.40 
 -11  -8   1    5.80    3.50 
 -11  -8   1   19.10    5.00 
 -11  -8   1   10.70    3.70 
  11  -8  -1    1.90    4.20 
 -11   8   1    8.40    4.90 
 -10  -8   1   98.59    8.20 
 -10  -8   1   94.99    9.60 
 -10  -8   1   93.19    7.70 
  10  -8  -1  116.39   15.10 
  10  -8  -1  110.69   14.40 
 -10  -8   1  107.69    8.60 
 -10   8   1  111.99   13.50 
  10   8  -1  104.09    8.90 
   9  -8  -1  343.97   24.50 
   9  -8  -1  371.96   25.80 
  -9  -8   1  375.86   15.60 
  -9  -8   1  327.87   14.60 
  -9  -8   1  320.77   14.40 
  -9  -8   1  373.06   18.10 
  -9   8   1  363.06   23.30 
   9   8  -1  350.46   15.90 
  -8  -8   1  217.18   10.90 
  -8  -8   1  210.48   10.50 
   8  -8  -1  219.88   19.10 
  -8  -8   1  216.98   12.80 
   8  -8  -1  206.58   18.30 
  -8  -8   1  212.58   10.70 
  -8   8   1  219.08   17.30 
   8   8  -1  206.58   11.10 
  -7  -8   1   -0.90    2.40 
  -7  -8   1    1.70    2.20 
  -7  -8   1    0.20    1.60 
   7  -8  -1   -0.60    2.40 
   7  -8  -1   -1.10    1.90 
  -7   8   1   -0.20    1.70 
   7   8  -1    4.30    2.30 
   7   8  -1   -0.20    1.70 
  -6  -8   1  140.99    8.90 
  -6  -8   1  137.19    6.20 
   6  -8  -1  154.68   13.80 
  -6  -8   1  143.19    7.60 
   6  -8  -1  149.39   13.80 
   6   8  -1  145.39    8.20 
  -6   8   1  120.59   11.70 
  -6   8   1  133.59   12.10 
  -6   8   1  146.19   13.70 
   6   8  -1  149.29    7.50 
  -5  -8   1  245.38    7.20 
  -5  -8   1  253.17    9.70 
  -5   8   1  276.67   24.40 
   5   8  -1  240.28   10.10 
  -5   8   1  245.08   19.30 
  -5   8   1  259.77   16.40 
   5   8  -1  255.77    9.10 
   4  -8  -1   46.10    8.70 
  -4  -8   1   44.10    2.60 
   4  -8  -1   39.40    7.30 
  -4  -8   1   48.20    4.00 
  -4   8   1   32.70    6.50 
   4   8  -1   38.90    3.60 
  -4   8   1   45.50    6.40 
  -4   8   1   39.00    7.30 
  -3  -8   1  475.65   10.90 
  -3  -8   1  475.65   14.00 
   3  -8  -1  454.65   21.00 
   3  -8  -1  488.15   21.10 
   3   8  -1  456.05   13.10 
  -3   8   1  476.35   19.50 
   3   8  -1  480.95   11.50 
  -3   8   1  472.75   21.10 
  -3   8   1  481.25   20.50 
   2  -8  -1  262.07   14.00 
   2  -8  -1  258.87   14.60 
  -2  -8   1  267.37    8.60 
  -2  -8   1  253.87   10.50 
  -2   8   1  262.97   14.30 
   2   8  -1  265.67    8.30 
   2   8  -1  265.97    9.90 
  -2   8   1  274.97   13.30 
  -2   8   1  273.17   14.10 
   1  -8  -1   91.99    7.40 
  -1  -8   1   96.99    5.70 
  -1  -8   1   91.99    6.70 
   1  -8  -1   98.19    8.30 
  -1   8   1   83.99    7.20 
  -1   8   1   95.89    7.70 
  -1   8   1   94.79    6.90 
   1   8  -1  101.29    6.40 
   1   8  -1   94.99    5.10 
   0  -8   1  853.51   22.40 
   0  -8  -1  900.21   25.60 
   0  -8   1  866.71   24.90 
   0  -8  -1  880.21   22.80 
   0   8  -1  884.71   24.10 
   0   8  -1  830.02   23.50 
   0   8   1  865.21   23.10 
   0   8   1  875.71   24.30 
   0   8   1  856.61   21.20 
   0   8  -1  882.61   21.20 
   1  -8   1  385.76   17.00 
  -1  -8  -1  403.46   15.30 
   1  -8   1  401.26   15.60 
  -1   8  -1  432.66   15.10 
  -1   8  -1  411.16   16.80 
  -1   8  -1  416.76   16.70 
   1   8   1  415.46   14.80 
   1   8   1  396.86   11.30 
   1   8   1  403.56   12.50 
   2  -8   1   32.30    5.70 
  -2  -8  -1   45.00    4.80 
   2  -8   1   33.60    6.40 
  -2   8  -1   40.20    6.70 
  -2   8  -1   39.80    5.40 
  -2   8  -1   39.00    4.80 
   2   8   1   35.80    3.90 
   3  -8   1   65.29    7.90 
  -3  -8  -1   67.09    5.50 
  -3   8  -1   67.49    7.60 
   3   8   1   64.59    5.30 
  -3   8  -1   55.79    6.90 
  -3   8  -1   73.89    7.30 
  -4  -8  -1   13.50    3.30 
   4  -8   1   12.30    4.50 
  -4   8  -1   13.50    3.90 
  -4   8  -1    9.80    3.50 
  -4   8  -1   14.70    4.40 
   4   8   1   20.60    3.90 
  -5  -8  -1   23.50    4.30 
   5  -8   1   33.20    7.70 
  -5   8  -1   15.20    4.40 
   5   8   1   23.20    4.40 
  -5   8  -1   26.60    6.80 
  -5   8  -1   26.70    5.90 
  -6  -8  -1    5.40    2.10 
   6  -8   1    4.60    3.40 
   6   8   1    3.60    2.50 
  -6   8  -1    2.20    2.90 
  -6   8  -1    6.30    3.80 
   7  -8   1   86.79   11.30 
  -7  -8  -1   76.49    4.40 
  -7  -8  -1   71.99    4.90 
  -7  -8  -1   73.39    8.00 
  -7  -8  -1   83.19    7.10 
   7   8   1   82.09    7.60 
  -7   8  -1   61.99   10.30 
  -8  -8  -1  299.87   17.30 
  -8  -8  -1  315.97   15.20 
  -8  -8  -1  305.47   10.90 
   8  -8   1  299.37   22.90 
   8   8   1  293.27   15.70 
  -8   8  -1  306.77   20.20 
  -9  -8  -1  104.89    9.30 
   9  -8   1  126.29   19.80 
  -9  -8  -1   96.29    6.70 
  -9  -8  -1  112.09   10.90 
  -9  -8  -1  106.49    8.10 
  -9   8  -1  111.99   12.70 
 -10  -8  -1  145.19    8.60 
 -10  -8  -1  187.28   11.50 
 -10  -8  -1  149.29   13.90 
 -10  -8  -1  143.79   11.30 
  10  -8   1  187.08   19.30 
 -10   8  -1  188.78   17.10 
  11  -8   1  113.69   18.90 
 -11  -8  -1  108.89   12.30 
 -11  -8  -1  105.09    9.80 
 -11  -8  -1  107.99    7.90 
 -11  -8  -1  103.19    9.50 
 -11   8  -1  124.69   15.30 
 -11   8  -1  116.19   14.20 
  12  -8   1   43.10   12.10 
 -12  -8  -1   35.80    7.10 
 -12  -8  -1   45.00    7.80 
 -12  -8  -1   46.70    5.80 
 -12   8  -1   28.50    9.40 
 -12   8  -1   34.50    9.60 
  13  -8   1   20.50    9.20 
 -13  -8  -1   10.30    4.00 
 -13  -8  -1   10.50    4.70 
 -13   8  -1   12.10    6.70 
 -13   8  -1    1.80    4.10 
 -14  -8  -1   67.99    9.30 
 -14  -8  -1   37.90    6.70 
 -14   8  -1   30.50    9.10 
 -14   8  -1   43.40   11.40 
  15  -8   1   -0.90    8.30 
 -15   8  -1   11.90    6.00 
 -15   8  -1   14.90    5.80 
 -15  -9   1   13.80    6.20 
  15  -9  -1   27.00   12.60 
 -15   9   1   25.20    9.90 
 -15   9   1   25.20    9.90 
  14  -9  -1   14.80    7.80 
 -14  -9   1   11.20    4.90 
 -14  -9   1   14.20    3.30 
 -14   9   1    0.90    5.00 
 -14   9   1   21.70    8.50 
  13  -9  -1    6.50    6.10 
 -13  -9   1    2.00    3.00 
 -13  -9   1   -0.70    2.50 
 -13   9   1   -5.40    4.00 
 -13   9   1   -4.10    3.80 
 -12  -9   1   -4.80    4.40 
 -12  -9   1    4.30    2.30 
 -12  -9   1   -0.50    2.80 
  12  -9  -1    4.40    5.10 
 -12  -9   1   -5.90    3.10 
 -12   9   1    8.50    5.70 
 -11  -9   1  238.08   13.00 
 -11  -9   1  250.47   16.10 
  11  -9  -1  265.37   22.80 
 -11  -9   1  250.17   13.40 
 -11  -9   1  218.58   12.20 
  11  -9  -1  232.48   22.30 
 -11   9   1  202.98   19.20 
  10  -9  -1   20.20    7.20 
 -10  -9   1   13.60    3.40 
 -10  -9   1   15.80    4.70 
 -10  -9   1   13.00    3.70 
 -10  -9   1   22.90    4.20 
  10  -9  -1   33.20    8.70 
 -10   9   1   16.20    6.10 
   9  -9  -1  217.88   19.60 
  -9  -9   1  198.98   10.10 
  -9  -9   1  178.38    9.80 
  -9  -9   1  176.98   10.10 
   9  -9  -1  197.28   19.40 
  -9  -9   1  221.58   13.50 
  -9   9   1  194.48   17.40 
   9   9  -1  204.58   11.10 
  -8  -9   1 1088.99   26.40 
   8  -9  -1 1122.99   45.10 
   8  -9  -1 1183.08   47.40 
  -8  -9   1 1226.18   33.30 
  -8  -9   1 1028.30   27.30 
  -8  -9   1 1158.38   29.00 
  -8   9   1 1163.38   42.50 
   8   9  -1 1172.18   28.00 
   7  -9  -1   89.69   14.50 
  -7  -9   1   60.69    5.40 
  -7  -9   1   63.49    6.60 
   7  -9  -1   72.29   12.70 
  -7  -9   1   57.19    4.10 
   7   9  -1   55.49    5.70 
   7   9  -1   67.09    5.10 
  -7   9   1   70.09   12.00 
   6  -9  -1  663.23   31.40 
  -6  -9   1  688.43   18.60 
  -6  -9   1  681.03   14.40 
   6  -9  -1  686.23   31.20 
   6   9  -1  659.93   19.20 
  -6   9   1  681.43   30.90 
  -6   9   1  692.93   32.10 
  -6   9   1  674.73   28.70 
   5  -9  -1  281.47   18.90 
  -5  -9   1  296.47   10.90 
   5  -9  -1  284.97   18.60 
  -5   9   1  279.17   17.70 
  -5   9   1  297.67   19.20 
  -5   9   1  268.47   16.70 
   5   9  -1  288.47   12.50 
   4  -9  -1   -0.10    2.60 
   4  -9  -1    0.10    2.30 
  -4  -9   1   -1.40    1.30 
  -4   9   1    2.00    2.50 
  -4   9   1   -0.40    2.50 
  -4   9   1   -3.40    1.50 
  -3  -9   1 2976.20   53.39 
   3  -9  -1 2989.10   65.79 
  -3  -9   1 2915.21   47.30 
   3  -9  -1 2993.00   67.49 
  -3   9   1 2918.41   64.39 
  -3   9   1 2974.70   62.39 
  -3   9   1 2850.41   65.49 
   3   9  -1 2986.60   47.60 
   2  -9  -1 1817.72   44.70 
  -2  -9   1 1845.12   38.20 
   2  -9  -1 1890.51   47.20 
  -2  -9   1 1739.03   33.40 
   2   9  -1 1836.62   32.00 
  -2   9   1 1780.52   41.80 
  -2   9   1 1825.22   44.70 
  -2   9   1 1765.52   44.80 
   2   9  -1 1830.32   36.40 
   1  -9  -1   14.60    4.10 
  -1  -9   1   19.40    4.00 
  -1  -9   1   17.30    3.80 
   1  -9  -1   15.70    3.90 
   1   9  -1   16.00    3.30 
  -1   9   1   22.60    4.70 
  -1   9   1   17.10    3.80 
  -1   9   1   16.00    4.00 
   1   9  -1   20.90    2.70 
   0  -9   1   53.09    6.10 
   0  -9  -1   56.19    6.00 
   0  -9   1   46.30    5.00 
   0  -9  -1   58.39    5.40 
   0   9  -1   52.39    5.60 
   0   9   1   61.79    5.60 
   0   9   1   54.09    5.80 
   0   9   1   48.30    4.50 
   0   9  -1   51.39    4.70 
   0   9  -1   61.89    5.80 
  -1  -9  -1   78.49    6.90 
   1  -9   1   98.39    8.50 
   1  -9   1   83.39    7.20 
   1   9   1   82.59    4.90 
   1   9   1   76.69    5.50 
  -1   9  -1   92.09    7.80 
   1   9   1   83.79    6.60 
  -1   9  -1   78.79    6.50 
  -1   9  -1   82.19    7.40 
   2  -9   1  109.29    9.80 
   2  -9   1   91.59    8.40 
  -2  -9  -1  102.19    7.50 
  -2   9  -1   96.39    8.90 
   2   9   1   95.69    3.80 
   2   9   1   91.59    6.70 
  -2   9  -1   96.89    7.70 
   2   9   1   99.89    4.70 
  -2   9  -1   98.79    8.70 
   3  -9   1  167.08   13.10 
  -3  -9  -1  166.38    9.40 
  -3   9  -1  178.18   12.70 
  -3   9  -1  175.28   12.90 
   3   9   1  160.48    8.80 
  -3   9  -1  165.48   11.10 
  -4  -9  -1  751.92   21.70 
   4  -9   1  744.13   31.10 
  -4   9  -1  705.63   29.50 
   4   9   1  716.13   21.00 
  -4   9  -1  755.22   26.80 
  -5  -9  -1   44.60    4.90 
   5  -9   1   44.00    8.90 
  -5   9  -1   52.19    7.20 
  -5   9  -1   43.00    8.50 
   5   9   1   47.30    5.00 
  -5   9  -1   55.89    9.60 
   6  -9   1    5.20    4.10 
  -6  -9  -1    7.50    2.80 
   6   9   1    5.70    3.10 
  -6   9  -1    7.30    3.50 
  -7  -9  -1 1400.66   34.60 
   7  -9   1 1355.66   49.70 
   7   9   1 1364.76   36.00 
  -7   9  -1 1350.96   44.10 
  -8  -9  -1 1729.83   47.10 
  -8  -9  -1 1638.74   40.70 
   8  -9   1 1773.22   60.49 
  -8   9  -1 1724.43   52.69 
   8   9   1 1730.53   43.80 
   9  -9   1   41.40   11.50 
  -9  -9  -1   43.20    4.20 
  -9  -9  -1   41.00    5.80 
  -9  -9  -1   66.59    8.30 
  -9   9  -1   56.39   11.40 
   9   9   1   60.99    7.60 
  10  -9   1  204.18   21.10 
 -10  -9  -1  188.28   14.90 
 -10  -9  -1  188.28   12.60 
 -10  -9  -1  194.98    9.30 
 -10  -9  -1  184.68   10.40 
 -11  -9  -1   86.09   10.60 
 -11  -9  -1   83.79    7.60 
  11  -9   1   61.09   14.80 
 -11  -9  -1   74.29    6.20 
 -11  -9  -1   74.39    8.40 
 -11   9  -1   68.49   12.30 
 -11   9  -1   72.19   14.90 
 -12  -9  -1    3.70    3.40 
 -12  -9  -1    2.80    2.30 
 -12  -9  -1    1.70    3.20 
  12  -9   1   -6.60    4.40 
 -12   9  -1   -3.70    3.60 
 -12   9  -1    1.80    5.40 
 -13  -9  -1  130.49   12.70 
  13  -9   1  118.99   21.30 
 -13  -9  -1  158.58    9.90 
 -13   9  -1  163.88   19.00 
 -13   9  -1  159.18   17.10 
 -14  -9  -1   40.00    7.90 
 -14  -9  -1   32.40    5.40 
  14  -9   1   16.00   10.00 
 -14   9  -1   29.20   10.40 
 -14   9  -1   23.80    9.50 
 -14 -10   1   16.00    4.30 
  14 -10  -1    3.40    5.90 
 -14 -10   1    8.70    4.80 
 -14  10   1   21.90    9.10 
 -14  10   1   -0.40    7.10 
 -13 -10   1  304.97   14.40 
 -13 -10   1  342.87   16.70 
  13 -10  -1  327.77   29.10 
 -13  10   1  286.97   26.40 
 -13  10   1  321.87   26.20 
 -12 -10   1  132.79    8.70 
 -12 -10   1  117.29    8.60 
  12 -10  -1  124.39   17.20 
 -12  10   1   99.39   17.40 
  11 -10  -1   22.20    7.70 
 -11 -10   1   31.60    6.80 
 -11 -10   1   29.30    5.10 
  11 -10  -1   26.50    9.40 
 -11 -10   1   28.80    5.50 
 -11 -10   1   32.50    4.50 
 -11  10   1   25.60    8.00 
 -10 -10   1  297.07   12.10 
 -10 -10   1  241.58   12.60 
 -10 -10   1  310.07   16.30 
  10 -10  -1  287.47   23.90 
 -10 -10   1  303.87   12.10 
 -10  10   1  306.97   22.90 
   9 -10  -1  100.29   16.90 
  -9 -10   1   91.39    8.70 
  -9 -10   1   81.19    6.90 
   9 -10  -1   99.09   17.00 
  -9 -10   1   89.49    6.10 
  -9 -10   1  105.89    7.00 
  -9  10   1  115.09   13.50 
   8 -10  -1  106.29   13.40 
  -8 -10   1   89.09    5.60 
  -8 -10   1   83.69    8.10 
  -8 -10   1   91.39    5.10 
  -8 -10   1   78.59    6.40 
   8 -10  -1   99.09   16.50 
  -8  10   1  112.79   12.90 
  -7 -10   1  706.63   20.00 
  -7 -10   1  713.63   23.10 
   7 -10  -1  704.23   33.70 
   7 -10  -1  667.43   34.00 
  -7  10   1  681.83   30.90 
   7  10  -1  688.43   20.90 
   6 -10  -1  463.85   26.60 
  -6 -10   1  459.05   15.00 
   6 -10  -1  464.85   25.90 
   6  10  -1  447.26   15.30 
  -6  10   1  459.15   23.70 
   5 -10  -1   25.00    6.50 
   5 -10  -1   34.30    8.20 
  -5 -10   1   31.30    3.70 
  -5  10   1   31.30    7.20 
  -5  10   1   30.60    6.10 
   5  10  -1   28.60    3.60 
  -5  10   1   18.70    5.50 
  -4 -10   1 1056.79   25.30 
   4 -10  -1 1005.50   37.00 
   4 -10  -1 1011.80   42.20 
   4  10  -1 1050.99   24.30 
  -4  10   1  996.60   34.80 
  -4  10   1 1036.40   34.80 
  -3 -10   1 1900.71   34.30 
   3 -10  -1 2022.70   53.39 
  -3 -10   1 2007.30   40.60 
   3 -10  -1 2002.10   51.19 
  -3  10   1 1909.51   47.30 
  -3  10   1 1943.01   49.80 
  -3  10   1 1943.11   51.29 
   3  10  -1 1971.20   38.80 
  -2 -10   1   42.70    3.90 
  -2 -10   1   45.60    5.30 
   2 -10  -1   47.30    6.50 
   2 -10  -1   40.90    7.50 
  -2  10   1   45.20    5.80 
   2  10  -1   50.59    4.50 
   2  10  -1   42.50    3.50 
   2  10  -1   39.40    4.30 
  -2  10   1   41.10    7.10 
  -2  10   1   41.40    7.00 
  -1 -10   1  410.06   14.50 
   1 -10  -1  438.96   18.10 
  -1 -10   1  455.05   17.50 
   1 -10  -1  442.26   19.90 
   1  10  -1  402.26   15.50 
   1  10  -1  441.26   13.30 
  -1  10   1  423.86   18.30 
  -1  10   1  435.76   18.30 
   1  10  -1  425.76   15.60 
  -1  10   1  422.86   16.40 
   0 -10  -1 2012.30   47.10 
   0 -10   1 1998.80   42.90 
   0 -10   1 2004.80   46.60 
   0  10  -1 1999.70   44.60 
   0  10   1 1944.91   40.00 
   0  10   1 1998.00   44.90 
   0  10   1 1969.00   43.20 
   0  10  -1 1993.00   44.50 
   0  10  -1 1987.50   40.00 
   1 -10   1   69.69    7.00 
  -1 -10  -1   79.29    7.40 
   1 -10   1   70.59    7.70 
   1  10   1   71.19    5.60 
  -1  10  -1   64.09    7.20 
   1  10   1   65.79    6.20 
  -1  10  -1   72.59    6.40 
   1  10   1   69.79    4.80 
  -1  10  -1   71.59    7.30 
   2 -10   1 1305.57   39.00 
  -2 -10  -1 1296.57   32.80 
  -2  10  -1 1264.07   36.80 
   2  10   1 1256.57   25.20 
  -2  10  -1 1258.87   37.60 
   2  10   1 1281.47   22.90 
   2  10   1 1298.77   31.50 
  -2  10  -1 1275.27   33.50 
  -3 -10  -1 1988.10   43.10 
   3 -10   1 2019.60   53.89 
  -3  10  -1 1990.50   52.59 
  -3  10  -1 1968.80   50.99 
   3  10   1 1951.90   41.60 
  -3  10  -1 1949.51   46.80 
  -4 -10  -1    2.30    1.80 
   4 -10   1    4.10    3.50 
  -4  10  -1    4.90    3.00 
  -4  10  -1   -1.60    1.30 
  -4  10  -1    7.50    3.70 
   5 -10   1  176.88   15.30 
  -5 -10  -1  184.28   10.40 
  -5  10  -1  189.68   13.80 
  -5  10  -1  180.38   15.20 
   5  10   1  183.98   10.40 
  -5  10  -1  169.58   14.00 
  -6 -10  -1  871.11   25.10 
   6 -10   1  780.82   36.20 
  -6  10  -1  833.52   32.20 
   6  10   1  804.82   25.00 
  -7 -10  -1    6.60    2.80 
   7 -10   1   11.60    6.40 
   7  10   1    8.50    3.00 
  -7  10  -1    8.10    4.20 
  -8 -10  -1  438.16   21.20 
   8 -10   1  481.85   30.00 
  -8 -10  -1  407.56   17.70 
  -8  10  -1  452.45   25.40 
   8  10   1  443.56   19.40 
  -9 -10  -1  515.05   24.00 
  -9 -10  -1  446.66   19.30 
   9 -10   1  512.35   32.80 
  -9  10  -1  523.15   28.30 
   9  10   1  487.45   21.60 
 -10 -10  -1  129.29   10.10 
 -10 -10  -1  148.59   12.80 
  10 -10   1  149.99   17.90 
 -10  10  -1  116.09   13.40 
 -11 -10  -1   47.90    4.60 
 -11 -10  -1   53.69    6.80 
 -11 -10  -1   44.20    8.50 
 -11 -10  -1   51.39    5.20 
  11 -10   1   49.30   11.90 
 -11  10  -1   47.00    9.80 
 -12 -10  -1  326.77   18.20 
 -12 -10  -1  350.26   13.00 
  12 -10   1  309.47   28.10 
 -12 -10  -1  391.76   15.30 
 -12  10  -1  388.36   26.90 
 -12  10  -1  346.47   27.80 
 -13 -10  -1  146.19    8.30 
 -13 -10  -1  154.68   12.40 
  13 -10   1  154.78   20.50 
 -13  10  -1  136.59   16.20 
 -14 -10  -1   15.30    5.00 
 -14  10  -1   11.40    7.80 
 -14  10  -1   20.80   14.70 
 -14 -11   1    2.30    4.30 
  14 -11  -1   -0.80   11.00 
 -14  11   1   -0.10    6.40 
 -14  11   1   -6.10    4.20 
 -13 -11   1    1.60    2.30 
  13 -11  -1  -10.60    5.20 
 -13 -11   1    8.90    3.50 
 -13  11   1   -5.10    5.10 
 -12 -11   1   38.60    4.30 
 -12 -11   1   39.00    6.80 
  12 -11  -1   39.80   12.40 
 -12 -11   1   67.69    9.30 
 -12 -11   1   40.40    4.90 
 -12  11   1   35.00    9.10 
 -11 -11   1  115.79   10.90 
 -11 -11   1  107.99    6.70 
  11 -11  -1  129.99   18.10 
 -11 -11   1  119.69    9.40 
 -11 -11   1  117.39    7.20 
 -11  11   1  124.49   15.60 
  10 -11  -1   10.30    6.10 
 -10 -11   1   15.90    4.70 
  10 -11  -1   15.60    6.20 
 -10 -11   1   12.30    3.00 
 -10  11   1    7.20    4.80 
   9 -11  -1    0.80    3.80 
   9 -11  -1    5.70    4.60 
  -9 -11   1    2.30    1.80 
  -9 -11   1    5.40    2.70 
  -9  11   1    1.30    3.50 
  -8 -11   1    4.50    2.40 
  -8 -11   1    8.00    3.20 
   8 -11  -1    4.60    3.80 
   8 -11  -1    4.30    4.60 
   8  11  -1    5.60    2.50 
  -8  11   1   10.00    4.80 
   7 -11  -1    2.40    3.60 
   7 -11  -1    8.00    5.50 
   7  11  -1    6.40    2.60 
  -7  11   1    3.50    3.40 
   6 -11  -1    2.50    2.70 
   6 -11  -1    0.20    3.20 
  -6 -11   1    0.30    1.60 
   6  11  -1   -0.70    1.40 
  -6  11   1    3.00    2.90 
  -5 -11   1   -0.50    1.60 
   5 -11  -1    1.90    2.60 
   5 -11  -1    1.80    2.60 
   5  11  -1   -1.10    1.30 
  -5  11   1    0.20    2.20 
  -5  11   1    2.00    3.20 
   4 -11  -1  288.47   19.40 
  -4 -11   1  281.57   12.30 
   4 -11  -1  256.87   17.50 
  -4  11   1  292.77   17.20 
   4  11  -1  256.67   11.10 
  -4  11   1  283.87   17.70 
  -4  11   1  279.57   18.30 
  -3 -11   1  730.83   17.40 
   3 -11  -1  752.42   30.80 
  -3 -11   1  741.43   22.30 
   3 -11  -1  771.22   29.40 
  -3  11   1  733.03   28.50 
   3  11  -1  732.53   18.20 
   3  11  -1  733.33   20.70 
  -3  11   1  729.83   26.70 
   3  11  -1  731.73   16.50 
  -3  11   1  717.03   29.10 
   2 -11  -1  102.69   10.70 
  -2 -11   1  100.09    6.50 
  -2 -11   1  101.49    8.10 
   2 -11  -1  115.69   10.10 
  -2  11   1  103.69    9.80 
  -2  11   1  103.99    8.90 
   2  11  -1  107.19    7.40 
  -2  11   1  110.29   10.00 
   2  11  -1   92.99    5.30 
   2  11  -1   80.29    7.40 
  -1 -11   1  414.46   17.60 
   1 -11  -1  438.26   20.70 
  -1 -11   1  409.26   15.20 
  -1  11   1  412.56   18.60 
   1  11  -1  401.46   15.90 
   1  11  -1  404.76   13.20 
  -1  11   1  397.46   16.30 
   1  11  -1  410.16   16.30 
  -1  11   1  403.16   18.40 
   0 -11  -1   82.69    8.50 
   0 -11   1   82.49    7.20 
   0 -11   1   86.89    8.60 
   0  11  -1   84.59    7.70 
   0  11   1   71.49    7.10 
   0  11  -1   74.29    7.30 
   0  11   1   76.49    7.60 
   0  11   1   95.39    6.80 
   0  11  -1   90.29    6.70 
  -1 -11  -1   69.69    7.40 
   1 -11   1   55.59    6.50 
   1 -11   1   79.39    8.40 
   1  11   1   62.89    6.80 
  -1  11  -1   63.29    7.30 
  -1  11  -1   62.79    7.40 
  -1  11  -1   60.29    6.20 
   1  11   1   65.09    6.60 
   1  11   1   71.89    5.20 
  -2 -11  -1    8.30    3.40 
   2 -11   1    8.30    4.00 
  -2  11  -1   11.20    3.70 
   2  11   1   10.20    2.30 
  -2  11  -1    9.00    3.50 
  -2  11  -1    9.00    3.50 
   2  11   1    7.80    1.90 
   2  11   1   12.10    3.20 
  -3 -11  -1  133.19    9.50 
   3 -11   1  119.49   13.60 
  -3  11  -1  139.19   10.60 
  -3  11  -1  138.39   12.50 
   3  11   1  140.99    9.10 
  -3  11  -1  141.39   12.00 
  -4 -11  -1  181.48   10.80 
   4 -11   1  166.58   14.70 
   4  11   1  184.48   10.60 
  -4  11  -1  194.28   13.60 
  -4  11  -1  182.38   14.60 
  -4  11  -1  161.08   13.60 
   5 -11   1  159.98   15.20 
  -5 -11  -1  148.89    9.60 
  -5  11  -1  147.29   12.40 
   5  11   1  130.49    9.00 
   6 -11   1  110.99   13.30 
  -6 -11  -1  125.19    9.00 
   6  11   1  118.79    8.90 
  -6  11  -1  122.79   12.10 
  -7 -11  -1   12.80    4.00 
   7 -11   1    8.50    4.60 
  -7  11  -1    9.70    4.80 
   7  11   1   17.90    4.20 
  -8 -11  -1    1.70    2.20 
   8 -11   1   16.30    6.30 
  -8 -11  -1    9.40    3.90 
  -8  11  -1    8.00    4.60 
   8  11   1    4.40    3.20 
  -9 -11  -1   21.30    5.50 
   9 -11   1   16.50    7.60 
  -9 -11  -1   24.50    5.70 
  -9  11  -1   22.20    7.70 
   9  11   1   21.90    5.60 
 -10 -11  -1   35.70    7.30 
  10 -11   1   19.30    8.10 
 -10 -11  -1   26.70    5.70 
 -10  11  -1   34.80    9.20 
 -11 -11  -1   -2.90    2.20 
 -11 -11  -1    9.10    4.80 
  11 -11   1   -8.10    3.80 
 -11  11  -1   14.10    6.50 
  12 -11   1   46.20   12.20 
 -12 -11  -1   38.40    6.80 
 -12  11  -1   32.10   10.20 
 -12  11  -1   47.60   10.70 
 -13 -11  -1   -3.90    3.50 
  13 -11   1   -1.60    5.70 
 -13  11  -1   -4.30    5.00 
 -13  11  -1    3.00    5.70 
 -14 -11  -1    7.40    4.80 
  14 -11   1    9.70    9.60 
 -14  11  -1   13.80    7.40 
 -14  11  -1   12.40    6.70 
  14 -12  -1   30.90   10.10 
 -14  12   1   20.20    9.10 
 -14  12   1   23.50    8.80 
  13 -12  -1  245.48   26.80 
 -13  12   1  245.18   28.60 
 -12 -12   1   62.39    6.70 
  12 -12  -1   44.70   13.60 
 -12  12   1   48.90   12.50 
  11 -12  -1   33.70   10.60 
 -11 -12   1   54.29    8.40 
 -11 -12   1   61.29    6.50 
 -11  12   1   48.20   11.20 
  10 -12  -1  169.28   19.10 
 -10 -12   1  200.18   12.70 
 -10 -12   1  207.68   11.20 
 -10  12   1  188.28   18.30 
  -9 -12   1   31.60    5.80 
   9 -12  -1   34.00    9.80 
   9 -12  -1   37.10   14.20 
  -9 -12   1   26.40    4.30 
  -9  12   1   27.70    8.40 
   8 -12  -1   18.30    7.80 
  -8 -12   1   19.50    4.90 
  -8 -12   1   28.40    4.60 
   8 -12  -1   18.50    7.40 
  -8  12   1   15.80    6.00 
   8  12  -1   27.20    4.70 
  -7 -12   1  325.87   13.60 
   7 -12  -1  434.16   27.00 
   7 -12  -1  383.96   26.80 
   7  12  -1  396.66   15.30 
  -7  12   1  381.66   23.40 
   6 -12  -1   96.69   12.50 
  -6 -12   1   89.49    6.70 
   6 -12  -1   64.09   11.80 
  -6  12   1   84.19   10.30 
   6  12  -1   82.99    6.60 
  -5 -12   1   49.10    5.30 
   5 -12  -1   43.50    9.40 
   5 -12  -1   63.49   12.00 
   5  12  -1   42.30    4.70 
  -5  12   1   41.80    8.30 
  -4 -12   1  211.38   11.10 
   4 -12  -1  217.58   17.10 
   4 -12  -1  209.28   15.90 
  -4  12   1  193.68   14.20 
   4  12  -1  209.28   10.30 
  -4  12   1  217.88   16.50 
  -3 -12   1  866.51   20.50 
  -3 -12   1  848.12   25.60 
   3 -12  -1  918.81   35.50 
   3 -12  -1  887.01   33.90 
  -3  12   1  835.62   29.60 
   3  12  -1  872.11   18.90 
   3  12  -1  832.52   23.40 
   3  12  -1  852.41   21.10 
  -3  12   1  852.61   31.80 
   2 -12  -1   28.80    6.20 
   2 -12  -1   39.50    8.30 
  -2 -12   1   39.00    6.50 
  -2 -12   1   35.60    4.10 
  -2  12   1   33.80    7.20 
   2  12  -1   37.80    4.80 
   2  12  -1   31.60    4.40 
  -2  12   1   24.10    5.20 
   2  12  -1   30.20    3.40 
  -2  12   1   34.80    7.00 
  -1 -12   1  375.36   17.70 
  -1 -12   1  377.56   15.40 
   1 -12  -1  378.26   19.90 
  -1  12   1  374.36   16.10 
   1  12  -1  395.06   16.30 
  -1  12   1  356.66   17.80 
   1  12  -1  375.06   13.10 
  -1  12   1  359.76   18.00 
   1  12  -1  358.36   15.80 
   0 -12   1 1254.67   37.40 
   0 -12   1 1257.47   33.90 
   0 -12  -1 1268.77   37.90 
   0  12   1 1225.98   35.00 
   0  12  -1 1259.37   35.00 
   0  12   1 1264.17   30.20 
   0  12  -1 1233.88   30.10 
   0  12  -1 1270.67   34.90 
   0  12   1 1225.98   33.70 
  -1 -12  -1    1.80    2.20 
   1 -12   1    2.40    2.20 
  -1  12  -1    3.20    2.70 
   1  12   1   -1.70    1.30 
  -1  12  -1    0.00    1.90 
   1  12   1    1.70    1.90 
   1  12   1    1.70    1.80 
  -1  12  -1   -2.30    1.60 
   2 -12   1  349.47   24.30 
  -2 -12  -1  357.96   17.00 
   2  12   1  365.46   10.40 
   2  12   1  379.06   12.70 
  -2  12  -1  344.87   16.60 
  -2  12  -1  383.46   20.00 
   2  12   1  380.46   16.30 
   3 -12   1 3287.97   78.29 
  -3 -12  -1 3415.56   66.99 
   3  12   1 3304.77   64.19 
  -3  12  -1 3286.17   76.69 
  -3  12  -1 3259.27   74.59 
  -3  12  -1 3292.07   70.99 
   4 -12   1    5.30    4.30 
  -4 -12  -1    4.90    2.40 
  -4  12  -1    4.70    3.70 
   4  12   1    7.40    2.50 
  -4  12  -1    4.70    3.80 
  -4  12  -1    1.10    2.20 
  -5 -12  -1  572.94   20.80 
   5 -12   1  582.34   30.60 
  -5  12  -1  590.24   26.10 
   5  12   1  561.24   20.30 
   6 -12   1  176.68   17.20 
  -6 -12  -1  185.88   11.40 
   6  12   1  174.68   11.00 
  -6  12  -1  201.28   15.60 
  -7 -12  -1   87.59    7.60 
   7 -12   1   59.89   12.10 
   7  12   1   85.99    8.40 
  -7  12  -1   97.19   11.30 
   8 -12   1  129.59   15.60 
  -8 -12  -1  115.59    9.20 
   8  12   1  117.79   10.00 
  -8  12  -1  127.09   13.90 
   9 -12   1   81.29   16.30 
  -9 -12  -1   61.89    6.90 
  -9 -12  -1   51.89    8.90 
   9  12   1   63.79    9.10 
  -9  12  -1   51.09   10.90 
 -10 -12  -1   33.10    6.10 
 -10 -12  -1   30.80    6.90 
  10 -12   1   40.40   11.10 
  10  12   1   39.90    6.60 
 -10  12  -1   25.40    8.20 
 -11 -12  -1   33.80    7.20 
 -11 -12  -1   27.70    5.70 
  11 -12   1   17.80    7.90 
 -11  12  -1   34.60    9.30 
  12 -12   1  265.77   26.20 
 -12 -12  -1  204.38   14.30 
 -12  12  -1  224.28   23.80 
 -12  12  -1  192.58   19.60 
 -13 -12  -1  113.69   10.80 
  13 -12   1  136.99   25.90 
 -13  12  -1  111.29   23.30 
  14 -12   1   40.70   12.40 
 -14 -12  -1   39.40    6.80 
 -14  12  -1   36.00    9.60 
 -14  12  -1   28.80   11.10 
 -13  13   1    8.90    5.80 
  12 -13  -1  216.78   25.30 
 -12 -13   1  228.98   12.10 
 -12  13   1  216.08   20.80 
  11 -13  -1  138.29   18.50 
 -11 -13   1  158.38    9.80 
 -11 -13   1  142.19   11.30 
 -11  13   1  150.68   17.20 
 -10 -13   1   -0.10    3.20 
  10 -13  -1   -2.30    4.10 
 -10 -13   1   -3.00    2.20 
 -10  13   1    6.70    4.40 
  -9 -13   1  125.29   10.00 
   9 -13  -1  153.78   18.60 
  -9 -13   1  138.59    8.80 
  -9  13   1  134.89   15.20 
   8 -13  -1  254.77   22.00 
  -8 -13   1  212.88   11.10 
  -8 -13   1  239.58   13.30 
   8 -13  -1  247.28   22.70 
   8  13  -1  244.48   12.30 
  -8  13   1  271.57   20.50 
   7 -13  -1    5.80    3.80 
  -7 -13   1    1.90    2.40 
   7 -13  -1    1.70    3.70 
   7  13  -1    2.50    2.20 
  -7  13   1    8.00    3.90 
   6 -13  -1  197.88   18.30 
   6 -13  -1  197.78   17.90 
  -6 -13   1  177.98   10.20 
   6  13  -1  174.78    9.70 
  -6  13   1  190.18   16.00 
   5 -13  -1  922.01   40.10 
   5 -13  -1 1005.80   39.30 
  -5 -13   1  909.21   26.10 
  -5  13   1  902.71   34.60 
   5  13  -1  931.91   25.00 
   4 -13  -1  247.38   19.10 
  -4 -13   1  271.07   13.30 
   4 -13  -1  254.67   18.00 
   4  13  -1  255.67   11.70 
  -4  13   1  250.67   16.30 
  -4  13   1  245.18   18.00 
   3 -13  -1  295.57   20.20 
  -3 -13   1  308.87   14.90 
   3  13  -1  292.27    9.80 
   3  13  -1  300.87   11.60 
  -3  13   1  240.38   17.20 
  -3  13   1  298.37   16.80 
   3  13  -1  296.07   13.30 
  -3  13   1  293.97   18.70 
   2 -13  -1 1331.17   43.30 
  -2 -13   1 1262.77   35.50 
  -2  13   1 1242.08   39.10 
   2  13  -1 1235.28   32.70 
  -2  13   1 1236.88   35.80 
   2  13  -1 1253.07   26.70 
   2  13  -1 1302.57   31.70 
  -2  13   1 1293.07   40.40 
   1 -13  -1  899.11   33.50 
  -1 -13   1  951.20   31.10 
   1  13  -1  927.21   27.90 
   1  13  -1  909.71   28.20 
   1  13  -1  927.71   23.40 
  -1  13   1  899.71   30.90 
  -1  13   1  932.31   27.50 
  -1  13   1  905.71   31.20 
   0 -13   1 1180.48   37.20 
   0 -13  -1 1133.99   37.00 
   0  13   1 1169.08   29.60 
   0  13  -1 1176.38   34.30 
   0  13   1 1207.08   35.50 
   0  13   1 1154.58   33.40 
   0  13  -1 1155.68   34.60 
   0  13  -1 1187.68   29.80 
  -1 -13  -1 3303.37   71.09 
   1 -13   1 3316.27   74.79 
   1  13   1 3323.17   63.69 
  -1  13  -1 3292.17   72.09 
   1  13   1 3280.77   67.39 
   1  13   1 3298.37   58.09 
  -1  13  -1 3335.17   64.79 
  -1  13  -1 3201.48   79.79 
  -2 -13  -1  306.97   16.30 
   2 -13   1  331.57   20.20 
   2  13   1  319.87   15.50 
  -2  13  -1  330.87   16.40 
  -2  13  -1  294.27   17.30 
   2  13   1  303.07    9.80 
  -2  13  -1  283.77   18.60 
   2  13   1  314.17   12.10 
  -3 -13  -1  207.38   12.90 
   3 -13   1  165.08   15.40 
  -3  13  -1  188.08   14.90 
   3  13   1  175.58   11.20 
  -3  13  -1  169.68   14.00 
  -3  13  -1  212.08   13.90 
   4 -13   1 1879.41   58.39 
  -4 -13  -1 1929.01   45.60 
   4  13   1 1823.52   43.10 
  -4  13  -1 1872.81   49.99 
   5 -13   1  563.64   31.30 
  -5 -13  -1  569.64   21.40 
   5  13   1  555.64   20.50 
  -5  13  -1  553.34   25.70 
   6 -13   1  106.99   14.30 
  -6 -13  -1  116.19    9.20 
   6  13   1  100.49    8.60 
  -6  13  -1  119.29   12.60 
  -7 -13  -1  241.48   13.40 
   7 -13   1  313.27   24.70 
   7  13   1  265.57   14.60 
  -7  13  -1  277.87   19.60 
  -8 -13  -1  389.46   17.50 
   8 -13   1  357.26   31.40 
   8  13   1  350.06   17.40 
  -8  13  -1  353.86   23.70 
  -9 -13  -1    9.80    5.60 
  -9 -13  -1   15.20    4.70 
   9 -13   1    0.40    4.90 
  -9  13  -1    1.60    5.10 
 -10 -13  -1  315.17   19.60 
 -10 -13  -1  391.46   18.50 
  10 -13   1  339.17   29.20 
  10  13   1  385.46   19.70 
 -10  13  -1  370.06   25.80 
 -11 -13  -1  358.46   17.80 
  11 -13   1  333.77   29.30 
 -11 -13  -1  328.77   20.00 
 -11  13  -1  316.17   24.60 
 -12 -13  -1   43.10    7.60 
  12 -13   1   49.80   12.30 
 -12  13  -1   55.99   14.50 
 -12  13  -1   31.10    9.00 
 -13 -13  -1  100.19   10.20 
  13 -13   1   75.39   18.20 
 -13  13  -1   71.69   15.80 
 -13  13  -1  117.69   16.20 
  13 -14  -1   36.40   10.20 
 -13  14   1   18.10    8.20 
  12 -14  -1   18.90    9.30 
 -12 -14   1   17.50    4.20 
 -12  14   1   22.60    8.60 
  11 -14  -1    8.40    6.50 
 -11 -14   1    5.90    2.60 
 -11  14   1    1.50    4.70 
  10 -14  -1    7.70    6.20 
 -10 -14   1    3.80    3.80 
 -10 -14   1    0.40    2.60 
 -10  14   1    6.60    4.30 
  -9 -14   1    1.90    2.30 
  -9 -14   1    3.60    3.10 
   9 -14  -1   -4.00    4.50 
   9  14  -1    0.20    2.70 
  -9  14   1   -0.10    4.50 
  -8 -14   1   34.90    4.90 
   8 -14  -1   46.80   12.20 
  -8 -14   1   43.00    6.70 
   8  14  -1   44.30    6.00 
  -8  14   1   41.20   13.90 
  -7 -14   1    7.40    2.60 
   7 -14  -1   13.90    5.10 
   7  14  -1   12.10    3.40 
  -7  14   1   11.50    5.60 
   6 -14  -1    8.70    5.60 
  -6 -14   1    3.00    2.00 
  -6  14   1   -0.60    3.00 
   6  14  -1    7.50    2.50 
   5 -14  -1  263.47   21.40 
  -5 -14   1  218.68   12.00 
   5  14  -1  243.18   11.80 
  -5  14   1  251.67   17.80 
  -4 -14   1  414.36   17.80 
   4 -14  -1  431.76   26.20 
  -4  14   1  403.26   21.70 
   4  14  -1  448.56   16.80 
  -3 -14   1  123.39    9.90 
   3 -14  -1  114.89   13.10 
  -3  14   1  121.49   12.40 
   3  14  -1  118.59    6.30 
  -3  14   1  130.29   11.30 
   3  14  -1  130.29    9.10 
   2 -14  -1   85.89   11.00 
  -2 -14   1  109.29    9.40 
   2  14  -1   88.59    6.00 
   2  14  -1   84.49    7.90 
  -2  14   1   91.19    8.90 
  -2  14   1   81.29    9.70 
   2  14  -1   94.09    7.60 
  -1 -14   1  179.58   13.30 
   1 -14  -1  148.99   13.60 
   1  14  -1  172.58   11.60 
  -1  14   1  161.38   12.60 
  -1  14   1  176.98   12.90 
   1  14  -1  160.38   11.10 
  -1  14   1  170.28   11.10 
   0 -14   1   -1.90    2.30 
   0 -14  -1   -3.40    2.20 
   0  14   1    2.30    3.00 
   0  14  -1    1.40    2.90 
   0  14  -1    2.70    2.00 
   0  14   1    2.70    1.80 
   1 -14   1   10.40    5.00 
  -1 -14  -1   18.40    5.70 
  -1  14  -1   11.30    5.20 
   1  14   1   16.40    3.50 
   1  14   1   15.60    4.50 
  -1  14  -1   20.10    5.80 
  -1  14  -1   15.40    4.40 
   2 -14   1  235.98   17.30 
  -2 -14  -1  202.28   13.90 
  -2  14  -1  219.08   15.90 
  -2  14  -1  209.18   13.90 
   2  14   1  191.48   12.30 
   2  14   1  194.48    8.10 
  -2  14  -1  195.18   14.70 
  -3 -14  -1    0.90    2.70 
   3 -14   1    0.80    3.80 
   3  14   1    4.40    2.70 
  -3  14  -1    7.90    3.70 
  -3  14  -1    7.90    3.50 
  -4 -14  -1  120.59    9.80 
   4 -14   1  114.79   14.00 
   4  14   1  112.79    9.10 
  -4  14  -1  114.09   11.20 
   5 -14   1   41.00   10.90 
  -5 -14  -1   68.49    7.70 
  -5  14  -1   61.29   10.80 
   5  14   1   65.69    6.90 
   6 -14   1  411.26   28.00 
  -6 -14  -1  295.37   15.40 
   6  14   1  365.66   16.80 
  -6  14  -1  370.96   22.10 
  -7 -14  -1   10.40    3.80 
   7 -14   1   12.60    7.50 
   7  14   1    8.00    3.80 
  -7  14  -1   22.80    6.80 
   8 -14   1   11.30    5.10 
  -8 -14  -1    2.90    2.20 
   8  14   1    5.50    3.20 
  -8  14  -1   -5.20    2.90 
   9 -14   1   79.69   16.10 
   9  14   1   76.69   10.10 
  -9  14  -1  114.09   14.30 
  10 -14   1   30.70    9.80 
 -10 -14  -1   30.80    6.10 
 -10 -14  -1   38.80    7.50 
 -10  14  -1   14.70    6.80 
  10  14   1   33.30    6.40 
  11 -14   1   -5.10    5.10 
 -11 -14  -1   15.40    3.90 
 -11  14  -1    2.90    4.40 
 -12 -14  -1   -0.10    3.40 
  12 -14   1    0.30    6.50 
 -12  14  -1    8.00    5.60 
  13 -14   1   15.90    9.90 
 -13  14  -1   18.80    6.90 
  13 -15  -1   -0.90    6.80 
 -13  15   1   -6.20    3.80 
 -12  15   1  135.39   22.80 
  11 -15  -1  326.97   29.40 
 -11 -15   1  314.77   13.90 
 -11  15   1  280.47   24.00 
 -10 -15   1   86.09    7.20 
  10 -15  -1   70.19   16.80 
 -10 -15   1   62.69    8.10 
 -10  15   1   67.19   13.50 
   9 -15  -1   71.39   15.50 
  -9 -15   1   97.79    8.80 
  -9 -15   1   81.59    7.00 
  -9  15   1   91.49   13.00 
   9  15  -1   92.29    8.00 
  -8 -15   1  365.26   15.70 
   8 -15  -1  360.66   28.70 
  -8  15   1  339.97   24.10 
   8  15  -1  357.36   15.30 
  -7 -15   1   50.89    5.80 
  -7  15   1   46.50    9.70 
   7  15  -1   58.59    6.30 
   6 -15  -1    2.00    5.10 
  -6 -15   1   -3.20    2.10 
   6  15  -1    4.60    2.90 
  -6  15   1   -4.00    3.00 
  -5 -15   1  400.26   17.90 
   5 -15  -1  540.35   31.50 
  -5  15   1  469.95   25.00 
   5  15  -1  486.55   17.80 
   4 -15  -1  383.66   25.60 
  -4 -15   1  268.27   15.00 
   4  15  -1  329.57   14.90 
  -4  15   1  328.37   19.60 
   3 -15  -1   63.59   12.00 
  -3 -15   1   60.19    6.80 
   3  15  -1   46.50    5.50 
  -3  15   1   63.79    8.70 
   3  15  -1   49.50    4.40 
  -3  15   1   43.80    8.10 
   3  15  -1   44.70    6.80 
   2 -15  -1  252.07   18.90 
  -2 -15   1  246.88   15.40 
  -2  15   1  261.77   15.20 
   2  15  -1  264.97   10.70 
   2  15  -1  243.38   13.00 
   2  15  -1  266.37   14.30 
  -2  15   1  244.88   17.00 
   1 -15  -1  408.56   23.30 
  -1 -15   1  387.16   20.60 
   1  15  -1  389.06   18.10 
   1  15  -1  419.26   15.20 
  -1  15   1  401.16   21.50 
  -1  15   1  400.96   17.80 
  -1  15   1  401.56   20.80 
   1  15  -1  421.26   20.20 
   0 -15   1   35.20    7.40 
   0 -15  -1   21.10    5.80 
   0  15   1   17.80    5.20 
   0  15   1   28.10    5.30 
   0  15  -1   30.90    6.00 
   0  15  -1   18.90    5.40 
   0  15  -1   25.70    5.10 
   0  15   1   34.50    6.30 
   1 -15   1  294.27   19.70 
  -1 -15  -1  323.07   19.00 
  -1  15  -1  336.67   16.10 
   1  15   1  325.77   17.40 
  -1  15  -1  345.07   20.30 
  -1  15  -1  306.07   18.10 
   1  15   1  348.07   15.90 
   1  15   1  335.87   13.10 
   2 -15   1  425.36   24.50 
  -2 -15  -1  421.26   25.40 
  -2  15  -1  452.15   20.10 
   2  15   1  415.86   19.20 
  -2  15  -1  445.06   23.60 
   2  15   1  409.46   15.40 
   2  15   1  409.36   12.60 
  -3 -15  -1  134.99   11.00 
   3 -15   1  119.89   13.70 
   3  15   1  121.29   11.70 
  -3  15  -1  116.59   10.80 
  -4 -15  -1  409.06   19.80 
   4 -15   1  417.86   26.80 
  -4  15  -1  424.96   22.00 
   4  15   1  427.56   18.50 
   5 -15   1  137.99   16.80 
  -5 -15  -1  141.59   11.20 
   5  15   1  159.28   11.00 
  -5  15  -1  140.99   13.50 
  -6 -15  -1  240.78   14.30 
   6 -15   1  281.87   23.90 
  -6  15  -1  268.57   18.90 
   6  15   1  262.47   14.40 
  -7 -15  -1  115.49    9.80 
   7 -15   1  103.29   28.80 
   7  15   1  124.39   10.50 
  -7  15  -1  130.89   14.10 
   8 -15   1  205.48   21.80 
  -8 -15  -1  207.38   20.00 
  -8  15  -1  219.68   18.50 
  -9 -15  -1   86.69    8.80 
   9 -15   1   83.69   17.70 
  -9 -15  -1   55.89    8.80 
   9  15   1   66.59    9.00 
  -9  15  -1   66.09   12.30 
 -10 -15  -1  136.89   12.00 
  10 -15   1  130.69   17.80 
 -10 -15  -1  148.29   11.00 
 -10  15  -1  131.89   15.30 
  10  15   1  135.69   11.60 
 -11 -15  -1  100.79    9.50 
  11 -15   1   67.59   15.30 
 -11  15  -1   82.29   15.40 
 -12 -15  -1    3.80    3.80 
  12 -15   1    5.10    6.20 
 -12  15  -1   -1.00    4.70 
 -13  15  -1   82.89   14.40 
 -13  15  -1   37.50   12.30 
  12 -16  -1   32.20   12.10 
 -12  16   1   50.69   11.70 
  11 -16  -1   -2.70    6.80 
 -11 -16   1    7.10    3.40 
 -11  16   1   -8.00    4.10 
 -10 -16   1  112.09    8.20 
  10 -16  -1   77.19   17.20 
 -10  16   1   72.29   13.50 
  -9 -16   1  171.08   11.30 
   9 -16  -1  163.48   19.60 
  -9 -16   1  159.08   10.00 
  -9  16   1  181.58   18.00 
   9  16  -1  149.29    9.70 
  -8 -16   1   22.50    4.50 
  -8  16   1   18.60    7.60 
   8  16  -1   12.20    3.80 
  -7 -16   1  105.39    8.20 
   7 -16  -1   88.99   16.60 
   7  16  -1   93.19    7.90 
   6 -16  -1  766.92   41.50 
  -6 -16   1  643.24   23.50 
  -6  16   1  813.62   35.20 
   6  16  -1  741.23   23.50 
   5 -16  -1    7.60    5.70 
  -5  16   1    0.90    4.10 
   5  16  -1   -2.40    2.50 
  -4 -16   1  417.66   19.60 
   4 -16  -1  517.15   30.40 
  -4  16   1  540.95   25.50 
   4  16  -1  491.85   19.20 
   3 -16  -1  459.55   27.50 
  -3 -16   1  431.96   20.70 
   3  16  -1  425.36   18.60 
  -3  16   1  467.15   22.40 
   3  16  -1  440.16   13.70 
   3  16  -1  434.26   16.00 
  -2 -16   1   14.80    4.50 
   2 -16  -1    7.60    5.10 
  -2  16   1    6.20    2.70 
  -2  16   1    7.00    4.80 
   2  16  -1   16.10    3.30 
   2  16  -1   12.10    4.00 
   2  16  -1   13.50    4.70 
  -1 -16   1  107.79   10.70 
   1 -16  -1  117.39   12.50 
  -1  16   1   96.19   10.60 
  -1  16   1   93.09    8.50 
   1  16  -1  104.99    9.20 
   1  16  -1   94.69    7.30 
   1  16  -1   99.29    9.30 
   0 -16   1   33.60    7.70 
   0 -16  -1   39.10    8.20 
   0  16   1   47.20    5.60 
   0  16   1   50.09    8.10 
   0  16  -1   37.70    7.00 
   0  16  -1   55.19    8.90 
   0  16  -1   45.00    5.70 
  -1 -16  -1   20.30    5.70 
   1 -16   1   36.40    8.10 
   1  16   1   15.80    4.90 
   1  16   1   25.30    5.50 
  -1  16  -1   14.60    4.40 
  -1  16  -1   13.00    4.60 
   1  16   1   14.10    3.30 
   2 -16   1    8.40    4.90 
  -2 -16  -1    7.20    3.50 
   2  16   1    0.20    1.90 
   2  16   1   10.60    3.50 
   2  16   1    6.00    3.00 
  -2  16  -1   18.70    5.30 
  -2  16  -1    4.00    2.70 
   3 -16   1  110.39   13.20 
  -3 -16  -1  103.09   10.50 
  -3  16  -1   98.89   10.20 
   3  16   1  112.39    9.50 
   4 -16   1  140.99   16.10 
  -4 -16  -1  142.39   11.80 
  -4  16  -1  122.79   12.00 
   4  16   1  120.79   10.20 
   5 -16   1   77.49   15.30 
   5  16   1   65.59    7.80 
  -5  16  -1   78.99   10.20 
   6 -16   1  186.38   20.00 
   6  16   1  183.18   14.60 
  -6  16  -1  173.18   15.40 
   7 -16   1    2.00    4.90 
  -7 -16  -1   15.70    7.20 
  -7  16  -1   -0.50    4.30 
   7  16   1    9.90    4.20 
  -8 -16  -1   50.99    6.70 
   8 -16   1   35.70   11.50 
  -8  16  -1   42.40    9.70 
   8  16   1   45.50    7.40 
   9 -16   1  411.56   32.40 
  -9 -16  -1  340.37   17.50 
  -9  16  -1  349.37   25.00 
   9  16   1  419.76   19.70 
 -10 -16  -1   17.40    4.90 
  10 -16   1   13.20    8.50 
 -10  16  -1    6.40    5.10 
  10  16   1   -1.10    5.30 
 -11 -16  -1   86.49    9.10 
 -11  16  -1   92.99   15.70 
  12 -16   1   52.69   16.50 
 -12 -16  -1   79.59   12.90 
 -12  16  -1   73.19   14.10 
  12 -17  -1   29.40   10.00 
 -12  17   1   14.90    6.20 
  11 -17  -1   33.00   11.10 
 -11  17   1   26.00   11.60 
 -10 -17   1   22.20    4.10 
  10 -17  -1   15.00    8.40 
 -10  17   1   40.80   11.00 
   9 -17  -1   79.89   17.50 
  -9 -17   1   52.09    6.20 
  -9 -17   1   58.29    7.40 
   9  17  -1   57.59    7.20 
  -9  17   1   66.19   12.30 
   8 -17  -1    8.90    7.40 
  -8 -17   1   17.40    4.50 
   8  17  -1   25.70    5.00 
  -8  17   1   27.70    8.10 
  -7 -17   1   28.80    5.50 
   7 -17  -1   32.90   10.10 
   7  17  -1   16.20    4.30 
  -7  17   1   23.60    7.30 
   6 -17  -1  100.99   18.40 
  -6 -17   1   77.69    8.10 
   6  17  -1   87.39    7.70 
  -6  17   1   63.09   11.80 
   5 -17  -1    8.70    6.10 
  -5 -17   1   11.50    3.50 
  -5  17   1    0.60    3.30 
   5  17  -1    4.60    3.20 
  -4 -17   1   74.59    7.90 
   4 -17  -1   49.80   11.50 
   4  17  -1   54.99    6.90 
  -4  17   1   78.79    9.90 
  -3 -17   1    8.40    4.20 
   3 -17  -1    2.00    4.30 
   3  17  -1    1.30    2.60 
  -3  17   1    2.50    2.50 
   3  17  -1    1.80    2.00 
  -2 -17   1   51.09    8.90 
   2 -17  -1   52.89   10.60 
   2  17  -1   48.90    4.90 
   2  17  -1   49.50    7.80 
  -2  17   1   56.39   10.40 
   2  17  -1   47.40    6.30 
  -2  17   1   46.20    8.00 
  -1 -17   1    3.90    3.90 
   1 -17  -1   -1.30    3.50 
   1  17  -1   10.80    4.40 
  -1  17   1    3.70    4.10 
   1  17  -1   10.00    3.10 
  -1  17   1    6.00    3.00 
   1  17  -1    7.60    3.70 
   0 -17  -1    0.80    2.80 
   0 -17   1    3.90    3.90 
   0  17  -1    5.20    2.50 
   0  17  -1    4.00    4.00 
   0  17   1    2.50    2.20 
   0  17   1    5.50    3.20 
  -1 -17  -1   50.09    9.40 
   1 -17   1   40.50    9.00 
  -1  17  -1   61.79    8.50 
   1  17   1   45.50    6.30 
   1  17   1   35.60    4.70 
  -1  17  -1   37.20    6.70 
  -2 -17  -1  213.98   15.70 
   2 -17   1  232.78   19.40 
   2  17   1  194.68   13.70 
   2  17   1  185.98    8.70 
  -2  17  -1  205.38   14.00 
   2  17   1  189.78   10.80 
  -3 -17  -1    5.40    4.00 
   3 -17   1    4.20    4.70 
   3  17   1   13.20    3.80 
  -3  17  -1   11.40    4.50 
   4 -17   1   11.70    6.50 
  -4 -17  -1   18.60    4.50 
   4  17   1    7.00    3.60 
  -4  17  -1    7.20    4.20 
  -5 -17  -1    2.20    2.80 
   5 -17   1   -9.70    4.00 
   5  17   1   -6.10    2.60 
   6 -17   1   36.70    9.70 
  -6 -17  -1   18.10    5.60 
   6  17   1   23.70    5.60 
  -6  17  -1   35.00    8.60 
   7 -17   1   -6.90    4.80 
  -7 -17  -1    0.10    2.60 
   7  17   1    5.30    3.70 
  -7  17  -1   -6.60    2.50 
   8 -17   1   41.60   11.90 
  -8 -17  -1   31.70    6.40 
   8  17   1   43.70    7.40 
  -8  17  -1   32.60    8.60 
   9 -17   1   49.30   12.60 
  -9 -17  -1   33.50    6.00 
  -9  17  -1   36.30    9.00 
   9  17   1   23.30    6.40 
  10 -17   1    5.80    6.50 
 -10 -17  -1   -0.90    3.10 
 -10  17  -1    6.60    4.80 
 -11 -17  -1   -6.00    3.00 
  11 -17   1   -0.70    5.70 
 -11  17  -1    0.80    4.90 
  12 -17   1   -2.40    6.10 
 -12  17  -1    4.10    5.40 
  11 -18  -1   29.10   10.70 
 -11  18   1   27.70    9.40 
  10 -18  -1   97.89   20.40 
 -10  18   1  142.09   16.50 
  -9 -18   1  609.84   21.40 
   9 -18  -1  615.34   40.80 
  -9  18   1  595.94   34.10 
   9  18  -1  523.15   23.60 
  -8 -18   1    3.70    3.40 
   8 -18  -1   -1.50    4.90 
   8  18  -1    2.40    4.00 
  -8  18   1    2.00    4.60 
  -7 -18   1  174.48   11.90 
   7 -18  -1  175.18   21.20 
  -7  18   1  177.58   17.40 
   7  18  -1  172.58   11.20 
  -6 -18   1  240.28   14.40 
   6 -18  -1  206.28   22.40 
   6  18  -1  209.38   12.70 
  -6  18   1  269.97   25.80 
  -5 -18   1   10.30    3.50 
   5 -18  -1   11.40    6.40 
   5  18  -1    5.50    3.80 
  -5  18   1   15.50    6.50 
   4 -18  -1  274.07   23.00 
  -4  18   1  258.47   17.90 
   4  18  -1  261.77   15.90 
   3 -18  -1  223.68   20.80 
  -3 -18   1  252.97   16.70 
   3  18  -1  272.47   10.80 
   3  18  -1  266.27   15.30 
   3  18  -1  276.67   13.10 
  -3  18   1  251.47   16.80 
   2 -18  -1    7.80    5.20 
  -2 -18   1    7.00    4.00 
  -2  18   1    0.60    3.00 
   2  18  -1   -1.80    2.80 
   2  18  -1    7.00    3.90 
   2  18  -1    6.40    2.30 
  -1 -18   1  361.86   21.90 
   1 -18  -1  343.27   24.10 
  -1  18   1  400.76   18.50 
   1  18  -1  400.06   16.00 
  -1  18   1  387.46   22.10 
   1  18  -1  400.66   20.00 
   0 -18   1  222.88   18.00 
   0 -18  -1  216.38   18.10 
   0  18   1  250.67   15.70 
   0  18   1  236.58   13.10 
   0  18  -1  198.08   18.30 
   0  18  -1  218.08   15.70 
   1 -18   1   16.50    5.90 
  -1 -18  -1    5.50    4.60 
   1  18   1    8.10    2.90 
  -1  18  -1   14.00    5.80 
  -1  18  -1    5.90    3.30 
   1  18   1   13.20    4.70 
   2 -18   1  107.19   13.90 
  -2 -18  -1  140.79   12.90 
   2  18   1  138.49    9.80 
   2  18   1  137.29    7.60 
  -2  18  -1  141.49   11.60 
   3 -18   1  144.29   16.60 
  -3 -18  -1  130.29   12.60 
  -3  18  -1  143.79   12.50 
   4 -18   1   51.79   11.60 
  -4 -18  -1   63.99    8.40 
   4  18   1   59.89    8.10 
  -4  18  -1   61.99   10.40 
  -5 -18  -1   25.60    6.50 
   5 -18   1   27.10    9.70 
   5  18   1   39.50    7.00 
  -5  18  -1   30.20    7.70 
   6 -18   1  252.87   23.60 
  -6 -18  -1  230.28   15.30 
  -6  18  -1  280.07   20.70 
   6  18   1  252.77   15.60 
   7 -18   1   92.59   17.40 
  -7 -18  -1   87.89   10.00 
  -7  18  -1   84.09   11.80 
   7  18   1   83.79    9.50 
   8 -18   1  113.09   21.50 
  -8 -18  -1   89.99    9.40 
   8  18   1  116.29   11.10 
  -8  18  -1  111.29   13.70 
   9 -18   1  240.18   25.80 
  -9 -18  -1  245.08   14.80 
  -9  18  -1  212.68   19.60 
   9  18   1  189.58   21.80 
 -10 -18  -1    4.50    4.00 
 -10  18  -1   10.10    6.00 
  11 -18   1  134.99   23.50 
 -11  18  -1  112.79   15.80 
  11 -19  -1  127.59   22.00 
 -11  19   1  162.68   19.00 
  10 -19  -1   73.89   17.00 
 -10  19   1   40.00   15.90 
   9 -19  -1   -2.20    7.00 
  -9 -19   1    1.70    3.10 
  -9  19   1   -0.50    5.40 
   8 -19  -1  199.68   22.50 
  -8 -19   1  196.48   11.90 
  -8  19   1  160.18   17.40 
   8  19  -1  152.68   11.90 
  -7 -19   1  103.79    8.80 
   7 -19  -1   71.69   15.80 
  -7  19   1   63.99   12.50 
   7  19  -1   79.19    8.90 
   6 -19  -1    7.10    5.70 
  -6 -19   1    7.40    3.40 
   6  19  -1    9.80    4.80 
  -6  19   1    5.50    3.90 
   5 -19  -1  120.89   15.40 
  -5 -19   1  113.79   12.00 
   5  19  -1   91.59    9.60 
  -5  19   1  105.29   12.20 
   4 -19  -1    7.00    7.10 
  -4 -19   1    2.00    3.10 
  -4  19   1   -1.70    3.80 
   4  19  -1    4.30    3.70 
   3 -19  -1    4.40    6.00 
  -3 -19   1   21.10    6.40 
   3  19  -1   29.80    4.10 
  -3  19   1   24.50    6.20 
   3  19  -1   27.60    5.80 
   3  19  -1   17.10    4.40 
  -2 -19   1   77.49   10.00 
   2 -19  -1   86.19   14.50 
   2  19  -1   95.59    9.60 
   2  19  -1   89.29    7.10 
  -2  19   1   70.99    9.20 
   1 -19  -1   -3.40    4.30 
  -1 -19   1    6.20    4.30 
  -1  19   1   -7.20    3.90 
   1  19  -1    1.40    2.60 
   1  19  -1    7.70    3.80 
  -1  19   1   -1.80    2.90 
   0 -19  -1   11.70    6.40 
   0 -19   1   15.70    5.90 
   0  19   1    8.80    5.30 
   0  19  -1   14.50    5.20 
   0  19   1   17.00    4.80 
   0  19  -1   12.80    3.90 
  -1 -19  -1    6.60    5.20 
   1 -19   1    1.70    4.20 
  -1  19  -1    2.80    2.70 
   1  19   1    2.20    2.70 
   1  19   1    9.30    4.00 
   2 -19   1   81.89   13.90 
  -2 -19  -1   83.49   10.50 
   2  19   1   79.09    6.10 
   2  19   1   99.29    8.40 
  -2  19  -1   89.99    9.80 
   3 -19   1    4.90    5.60 
  -3 -19  -1   11.30    4.40 
  -3  19  -1    2.10    3.00 
   4 -19   1   16.40   13.50 
  -4 -19  -1   20.30    5.90 
  -4  19  -1   19.90    6.00 
  -5 -19  -1   52.19    9.10 
   5 -19   1   40.30   10.90 
  -5  19  -1   46.90   15.40 
   6 -19   1   30.80   11.10 
  -6 -19  -1   31.60    6.50 
  -6  19  -1   25.70    8.10 
   6  19   1   17.50    7.80 
  -7 -19  -1   23.70    5.40 
   7 -19   1   23.20    8.60 
  -7  19  -1   19.90    6.80 
   8 -19   1   15.50    7.80 
  -8 -19  -1    2.70    3.70 
   8  19   1    2.10    5.10 
  -8  19  -1   -3.50    4.10 
  -9 -19  -1    5.80    3.90 
   9 -19   1   10.70    7.90 
  -9  19  -1   11.30    5.30 
  10 -19   1   26.20   10.60 
 -10 -19  -1   34.70    7.30 
 -10  19  -1   44.90   12.10 
  10 -20  -1   40.80   13.00 
 -10  20   1   22.00    8.80 
   9 -20  -1   75.79   19.20 
  -9  20   1   70.19   14.00 
  -8 -20   1    1.20    3.70 
   8 -20  -1   16.60    8.50 
  -8  20   1   -0.90    5.60 
  -7 -20   1  187.48   13.90 
   7 -20  -1  194.48   22.50 
   7  20  -1  181.38   13.60 
  -7  20   1  177.18   18.00 
  -6 -20   1  118.69   11.50 
   6 -20  -1  131.39   17.50 
  -6  20   1   96.79   13.60 
   6  20  -1   73.69    9.50 
  -5 -20   1   20.30    5.40 
   5 -20  -1   32.60    9.50 
  -5  20   1   22.20    7.30 
   5  20  -1   15.30    5.50 
  -4 -20   1  109.59   11.70 
   4 -20  -1  126.09   17.00 
  -4  20   1  124.19   13.20 
   4  20  -1  113.79   10.70 
   3 -20  -1  119.09   16.20 
  -3 -20   1  118.09   12.00 
   3  20  -1  110.19    8.60 
   3  20  -1   98.59    7.10 
  -3  20   1   90.89   11.20 
  -2 -20   1   13.30    6.00 
   2 -20  -1    4.30    5.90 
   2  20  -1   23.50    5.80 
   2  20  -1   20.30    4.40 
  -2  20   1   19.50    5.40 
  -1 -20   1   95.79   12.10 
   1 -20  -1   82.79   14.40 
  -1  20   1   85.89    8.90 
   1  20  -1   91.99    7.90 
   0 -20  -1   33.80    9.20 
   0 -20   1   20.00    7.80 
   0  20   1   21.90    4.80 
   0  20   1    3.30    5.30 
   0  20  -1   19.50    4.80 
   0  20  -1   14.00    6.30 
   1 -20   1   30.60    8.50 
  -1 -20  -1   18.20    6.80 
   1  20   1   26.30    4.70 
  -1  20  -1   25.60    6.20 
   1  20   1   17.00    5.20 
  -2 -20  -1   27.90    8.70 
   2 -20   1   46.20   10.90 
   2  20   1   37.70    4.50 
   2  20   1   36.00    5.90 
  -2  20  -1   35.40    7.20 
  -3 -20  -1   29.90    7.90 
  -3  20  -1   32.50    6.80 
  -4 -20  -1    1.50    3.30 
   4 -20   1    4.30    5.80 
  -4  20  -1    3.30    4.10 
   5 -20   1   60.39   13.60 
  -5 -20  -1   58.89   10.50 
  -5  20  -1   61.49   10.70 
  -6 -20  -1  214.98   15.90 
   6 -20   1  210.08   22.60 
  -6  20  -1  200.28   17.90 
   7 -20   1   51.19   13.20 
  -7 -20  -1   61.79    9.70 
  -7  20  -1   33.70    8.70 
  -8 -20  -1   48.00    8.60 
   8 -20   1   69.09   15.40 
  -8  20  -1   69.09   13.40 
  -9 -20  -1  221.78   14.30 
   9 -20   1  152.68   25.60 
  -9  20  -1  193.88   23.40 
  10 -20   1  -10.60    6.90 
 -10  20  -1   16.80    6.20 
   9 -21  -1   73.79   17.90 
  -9  21   1  111.99   15.90 
  -8 -21   1  310.97   19.20 
  -8  21   1  318.57   24.70 
   7 -21  -1   66.29   14.70 
  -7  21   1   41.20    9.80 
   6 -21  -1   83.39   16.00 
  -6 -21   1   89.99   10.60 
  -6  21   1  106.19   12.60 
   6  21  -1   78.09   10.20 
   5 -21  -1  132.59   18.50 
  -5 -21   1  200.48   14.90 
   5  21  -1  155.38   12.80 
  -5  21   1  151.68   15.90 
  -4 -21   1  102.39   11.30 
   4 -21  -1   95.19   18.70 
  -4  21   1   91.09   12.00 
  -3 -21   1  193.58   17.10 
   3 -21  -1  173.08   20.00 
  -3  21   1  194.38   15.80 
   3  21  -1  222.08   12.20 
   3  21  -1  209.48   10.30 
  -2 -21   1  330.47   22.40 
   2 -21  -1  266.37   24.10 
  -2  21   1  350.16   19.60 
   2  21  -1  317.27   17.50 
   2  21  -1  325.37   14.10 
  -1 -21   1    9.30    5.90 
   1 -21  -1    9.00    6.80 
   1  21  -1   11.10    4.00 
   1  21  -1   12.40    5.80 
  -1  21   1   14.60    4.80 
   0 -21   1   29.20    8.20 
   0 -21  -1   -3.70    5.40 
   0  21   1   13.90    4.30 
   0  21  -1   13.10    3.60 
   0  21   1   12.80    5.50 
   1 -21   1   95.29   15.90 
  -1 -21  -1  130.89   15.20 
   1  21   1  111.39   11.10 
  -1  21  -1  130.09   11.30 
   1  21   1  140.39    9.40 
  -2 -21  -1  100.39   15.50 
   2  21   1   94.29    9.00 
   2  21   1   89.79    6.80 
  -2  21  -1   84.49    9.80 
   3 -21   1   20.80    7.10 
  -3 -21  -1   17.20    6.50 
  -3  21  -1   13.60    5.10 
   4 -21   1  211.68   23.10 
  -4 -21  -1  190.98   16.10 
  -4  21  -1  187.58   21.50 
   5 -21   1  128.59   21.60 
  -5 -21  -1  134.09   13.60 
  -5  21  -1  164.48   15.30 
   6 -21   1   10.50    6.30 
  -6 -21  -1    4.20    4.10 
  -6  21  -1    1.00    4.70 
  -7 -21  -1  217.58   16.00 
   7 -21   1  224.58   24.00 
  -7  21  -1  214.08   19.40 
  -8 -21  -1  183.18   14.10 
  -8  21  -1  196.38   19.30 
   9 -21   1    2.20    6.20 
  -9  21  -1   -5.40    5.20 
   8 -22  -1   -1.70    6.20 
  -8  22   1   -0.90    5.40 
   7 -22  -1    0.50    6.70 
  -7  22   1    1.40    6.40 
   6 -22  -1    1.80    5.30 
  -6 -22   1   12.90    4.50 
  -6  22   1    6.40    5.30 
  -5 -22   1   11.30    5.40 
   5 -22  -1    0.10    5.90 
  -5  22   1   15.10    5.80 
  -4 -22   1   57.69   10.20 
   4 -22  -1   53.69   12.80 
  -4  22   1   72.69   12.30 
  -3 -22   1  187.98   17.20 
   3 -22  -1  193.08   21.50 
  -3  22   1  164.38   14.80 
   3  22  -1  139.59    8.90 
   3  22  -1  179.38   11.60 
  -2 -22   1   52.19   10.50 
   2 -22  -1   37.30   10.80 
  -2  22   1   39.20    7.90 
   2  22  -1   37.00    5.70 
   2  22  -1   52.69    8.20 
   1 -22  -1    8.90    7.10 
  -1 -22   1   -5.20    4.40 
   1  22  -1    2.40    3.00 
   1  22  -1   -6.70    5.30 
  -1  22   1   -1.40    3.40 
   0 -22  -1   52.09   15.10 
   0 -22   1   49.40   11.20 
   0  22   1   57.99    7.40 
   0  22   1   83.59   10.90 
   0  22  -1   52.69    7.20 
  -1 -22  -1   -2.90    4.50 
   1  22   1    1.80    3.30 
  -1  22  -1    2.10    3.10 
  -2 -22  -1  158.58   17.30 
   2 -22   1  158.58   19.30 
   2  22   1  145.79    8.50 
   2  22   1  141.99   11.00 
  -2  22  -1  137.59   13.10 
  -3 -22  -1   52.09   11.10 
   3 -22   1   31.40   10.50 
  -3  22  -1   42.80   10.00 
   4 -22   1   13.60    8.10 
  -4 -22  -1   13.40    7.10 
  -4  22  -1    5.60    5.00 
  -5 -22  -1   23.50    7.60 
   5 -22   1   54.39   11.60 
  -5  22  -1   20.70    7.20 
   6 -22   1   -5.70    5.40 
  -6 -22  -1    7.40    4.70 
  -6  22  -1   -0.30    4.10 
   7 -22   1    0.00    6.20 
  -7  22  -1   -5.10    4.20 
   8 -22   1   -5.20    6.00 
  -8 -22  -1    3.90    5.10 
   7 -23  -1   11.30    7.30 
  -7  23   1   -1.50    5.30 
   6 -23  -1   81.19   16.10 
  -6 -23   1  111.69   11.60 
  -6  23   1   69.39   13.10 
  -5 -23   1  168.68   15.10 
   5 -23  -1  158.18   20.90 
  -5  23   1  136.99   15.00 
  -4 -23   1   20.80    8.10 
   4 -23  -1   10.20    8.60 
  -4  23   1   15.40    6.10 
  -3 -23   1  216.88   18.70 
   3 -23  -1  233.08   23.60 
  -3  23   1  232.18   17.70 
   2 -23  -1   56.19   13.50 
  -2 -23   1   59.39   12.40 
  -2  23   1   71.29    9.50 
   2  23  -1   57.69    6.80 
   2  23  -1   36.60    9.60 
  -1 -23   1   47.40   10.90 
   1 -23  -1   47.00   11.20 
  -1  23   1   49.00    8.20 
   1  23  -1   50.39   10.30 
   1  23  -1   41.10    6.60 
   0 -23  -1   35.50   10.00 
   0  23  -1   19.30    5.20 
   0  23   1   12.30    5.20 
  -1 -23  -1  226.98   23.60 
   1 -23   1  200.18   20.80 
  -1  23  -1  191.98   14.50 
   1  23   1  209.08   18.60 
  -2 -23  -1  107.39   14.70 
   2 -23   1   73.69   15.60 
   2  23   1  111.09    7.60 
  -2  23  -1  105.19   11.90 
   2  23   1   93.09   14.50 
   3 -23   1   14.90    9.20 
  -3 -23  -1   21.00    8.50 
  -3  23  -1    2.30    5.20 
  -4 -23  -1  155.58   17.10 
   4 -23   1  155.18   19.40 
  -4  23  -1  155.08   15.10 
  -5 -23  -1   21.90    8.90 
   5 -23   1   52.49   14.00 
  -5  23  -1   55.39   11.00 
  -6 -23  -1    5.10    5.60 
   6 -23   1    2.40    5.90 
  -6  23  -1   -3.50    4.50 
   7 -23   1   16.60   10.00 
  -7 -23  -1   25.30    8.20 
  -7  23  -1   25.90    8.50 
   6 -24  -1   17.80    9.40 
  -6  24   1   22.30    8.40 
  -5 -24   1    9.20    5.20 
   5 -24  -1   -5.80    7.20 
  -5  24   1   -8.60    4.40 
   4 -24  -1  150.58   19.50 
  -4 -24   1  131.19   14.30 
  -4  24   1  116.09   13.50 
  -3 -24   1  309.17   22.90 
   3 -24  -1  293.17   26.40 
  -3  24   1  263.47   18.60 
  -2 -24   1   10.90    7.30 
   2 -24  -1   -6.50    7.20 
   2  24  -1    0.00    3.90 
  -2  24   1   21.50    6.30 
  -1 -24   1  174.98   19.40 
   1 -24  -1  140.59   18.50 
  -1  24   1  179.08   13.70 
   1  24  -1  159.68   11.50 
   0 -24  -1  349.77   27.10 
   0 -24   1  311.77   25.60 
   0  24   1  303.67   16.30 
   0  24  -1  306.37   17.10 
  -1 -24  -1   11.50    8.40 
   1 -24   1   17.20    8.90 
   1  24   1   13.00    4.80 
  -1  24  -1   13.60    5.40 
  -2 -24  -1  256.27   23.10 
   2 -24   1  249.78   24.40 
  -2  24  -1  278.17   18.40 
   2  24   1  252.97   11.60 
   3 -24   1  517.15   35.90 
  -3 -24  -1  467.15   47.30 
  -3  24  -1  497.45   26.30 
   4 -24   1   25.20    9.70 
  -4 -24  -1   18.90    9.20 
  -4  24  -1   25.50    7.00 
   5 -24   1  125.39   17.70 
  -5 -24  -1  115.79   14.90 
  -5  24  -1  102.99   13.30 
   6 -24   1   92.29   19.50 
  -6 -24  -1  117.39   14.30 
  -6  24  -1  112.59   14.30 
  -4 -25   1   -4.40    6.80 
   4 -25  -1   -7.60    9.10 
  -4  25   1   -3.10    5.40 
   3 -25  -1   42.20   12.40 
  -3 -25   1   16.10    9.50 
  -3  25   1   40.00    9.20 
  -2 -25   1   27.60    8.50 
   2 -25  -1   33.60   10.40 
  -2  25   1   24.50    7.00 
   2  25  -1   26.10    5.90 
  -1 -25   1   14.70    7.00 
   1 -25  -1    3.40    7.70 
   1  25  -1    2.00    4.70 
  -1  25   1   -0.30    4.70 
   0 -25  -1   19.10    8.60 
   0 -25   1    9.20    7.60 
   0  25  -1   -1.90    4.60 
   0  25   1   11.60    5.10 
   1 -25   1    3.10    6.90 
  -1 -25  -1   17.90    8.20 
   1  25   1   -1.10    3.80 
  -1  25  -1   -4.80    4.80 
  -2 -25  -1  123.59   17.40 
   2 -25   1  112.79   19.50 
  -2  25  -1  120.99   12.80 
  -3 -25  -1  -11.50    7.20 
   3 -25   1    8.50    7.60 
  -3  25  -1   23.10    7.70 
  -4 -25  -1  -14.40    6.10 
  -4  25  -1   11.30    5.80 
  -2 -26   1   41.10   12.40 
   2 -26  -1   50.29   12.90 
  -2  26   1   58.89    9.80 
  -1 -26   1   51.39   13.00 
   1 -26  -1   75.29   15.00 
   1  26  -1   49.50    8.00 
  -1  26   1   61.39    9.80 
   0 -26  -1  133.39   18.70 
   0 -26   1  174.08   20.10 
   0  26   1  125.09   11.40 
   0  26  -1  138.89   12.50 
  -1 -26  -1   14.00    7.10 
   1 -26   1  -10.20    6.80 
  -1  26  -1   -3.90    5.10 
   2 -26   1   88.99   15.20 
  -2 -26  -1   63.39   12.90 
  -2  26  -1   59.39    9.80 
 -16   0   2   90.89   15.10 
 -16   0   2  114.19   15.20 
 -15   0   2    8.20    5.90 
 -15   0   2    6.70    4.90 
 -14   0   2   85.89   11.60 
 -14   0   2   59.19   11.20 
  14   0  -2   63.59   13.30 
 -13   0   2  469.15   27.90 
 -13   0   2  447.46   25.50 
  13   0  -2  423.96   28.50 
  12   0  -2   12.30    6.10 
 -12   0   2   11.70    5.50 
  12   0  -2   13.80    5.80 
 -12   0   2    9.10    5.20 
 -11   0   2  147.89   14.20 
  11   0  -2  129.09   14.00 
  11   0  -2  113.39   12.60 
 -11   0   2  130.99   12.30 
  10   0  -2  453.65   24.40 
 -10   0   2  446.06   23.60 
 -10   0   2  436.46   24.10 
 -10   0   2  443.36   22.30 
  10   0  -2  419.46   24.60 
  -9   0   2    7.00    2.80 
  -9   0   2    0.70    1.50 
   9   0  -2    2.90    3.20 
  -9   0   2    8.20    4.20 
   9   0  -2    0.20    2.70 
   8   0  -2  526.65   24.90 
   8   0  -2  466.15   22.30 
  -8   0   2  491.55   22.00 
  -8   0   2  508.55   21.90 
  -8   0   2  485.65   28.00 
  -7   0   2  791.32   27.10 
  -7   0   2  804.72   29.60 
   7   0  -2  788.62   27.80 
   7   0  -2  784.22   29.50 
  -6   0   2  260.77   13.50 
   6   0  -2  242.78   13.50 
  -6   0   2  272.77   15.20 
   6   0  -2  247.58   14.80 
  -5   0   2  370.16   16.60 
  -5   0   2  355.86   14.50 
   5   0  -2  334.97   16.00 
   5   0  -2  355.46   15.00 
  -4   0   2 1823.52   40.60 
   4   0  -2 1767.72   37.50 
  -4   0   2 1872.31   37.60 
   4   0  -2 1850.41   41.30 
  -3   0   2   57.49    5.10 
  -3   0   2   60.79    4.30 
   3   0  -2   55.49    5.20 
   3   0  -2   53.39    4.30 
   2   0  -2 1882.61   32.80 
   2   0  -2 1865.61   36.00 
  -2   0   2 1932.41   32.50 
  -2   0   2 1907.81   36.00 
  -1   0   2 4176.68   65.19 
   0   0  -2    0.30    0.30 
   1   0   2 3070.19   47.40 
   1   0   2 3100.09   49.70 
  -1   0  -2 2912.51   47.00 
  -2   0  -2 2792.42   51.29 
   2   0   2 2809.62   49.20 
  -2   0  -2 2795.32   45.90 
  -2   0  -2 2713.23   48.60 
   2   0   2 2803.52   46.50 
   3   0   2   15.70    3.00 
  -3   0  -2   15.80    3.70 
  -3   0  -2   14.00    2.90 
   3   0   2   20.20    3.90 
  -3   0  -2   12.60    2.70 
  -3   0  -2   13.20    2.60 
  -4   0  -2  681.63   19.10 
   4   0   2  680.83   21.80 
  -4   0  -2  680.33   23.20 
   4   0   2  664.83   20.00 
  -4   0  -2  674.43   21.30 
  -4   0  -2  676.13   21.10 
  -5   0  -2 9128.29  152.38 
  -5   0  -2 9247.88  149.19 
  -5   0  -2 8906.51  147.09 
  -5   0  -2 9074.89  143.39 
  -6   0  -2  658.13   24.90 
  -6   0  -2  668.13   22.10 
  -6   0  -2  696.53   24.60 
  -6   0  -2  664.83   26.60 
  -7   0  -2   59.59    7.30 
  -7   0  -2   73.09   10.70 
  -7   0  -2   65.09    6.80 
  -7   0  -2   57.69   10.00 
  -8   0  -2  868.91   34.60 
  -8   0  -2  827.42   33.20 
  -8   0  -2  848.12   28.60 
  -8   0  -2  871.51   31.50 
  -9   0  -2  348.17   20.10 
  -9   0  -2  368.26   23.40 
  -9   0  -2  354.16   18.70 
  -9   0  -2  370.96   21.40 
 -10   0  -2   43.50    8.30 
 -10   0  -2   29.80    7.50 
 -11   0  -2  362.36   22.60 
 -11   0  -2  346.77   20.30 
 -12   0  -2  537.85   26.90 
 -12   0  -2  544.05   29.00 
 -13   0  -2   50.29    9.60 
 -13   0  -2   62.19   11.70 
 -14   0  -2  173.28   17.80 
 -14   0  -2  179.68   17.10 
 -15   0  -2  395.26   27.20 
 -15   0  -2  349.47   24.30 
 -16  -1   2   -6.80    4.80 
 -16  -1   2    3.30    5.60 
 -16   1   2   -1.30    4.80 
 -16   1   2    7.70    5.20 
 -15  -1   2   20.00    7.80 
 -15  -1   2   18.70    6.50 
 -15   1   2    3.50    5.60 
 -15   1   2   15.20    7.40 
  14  -1  -2   12.60    5.70 
 -14  -1   2    2.60    4.30 
 -14  -1   2   -5.60    3.30 
  14   1  -2   -6.50    3.20 
 -14   1   2   -2.10    3.90 
 -13  -1   2    1.60    4.00 
  13  -1  -2   -3.80    4.80 
 -13  -1   2    2.30    3.30 
  13  -1  -2    4.60    4.70 
  13   1  -2   -5.60    4.20 
 -13   1   2    0.20    3.90 
 -12  -1   2   60.79   11.40 
  12  -1  -2   52.39   11.50 
  12  -1  -2   56.99   11.80 
 -12  -1   2   45.90    9.00 
 -12   1   2   47.10   10.10 
 -12   1   2   34.60    8.80 
  12   1  -2   37.20    9.00 
 -11  -1   2   19.10    6.30 
  11  -1  -2   12.30    6.30 
  11  -1  -2   20.30    6.50 
 -11  -1   2    6.20    4.70 
 -11  -1   2   22.50    5.50 
  11   1  -2    8.10    4.70 
 -11   1   2   13.60    5.90 
 -11   1   2   20.60    5.90 
  11   1  -2   13.30    4.70 
 -10  -1   2   42.30    7.70 
  10  -1  -2   33.00    7.90 
  10  -1  -2   37.60    8.70 
 -10  -1   2   26.50    6.50 
 -10  -1   2   24.10    6.80 
 -10  -1   2   24.10    7.30 
  10   1  -2   41.80    8.90 
 -10   1   2   43.00    9.40 
 -10   1   2   33.90    7.70 
 -10   1   2   42.90    8.80 
  10   1  -2   32.40    8.10 
  -9  -1   2  215.58   14.00 
  -9  -1   2  214.38   15.80 
   9  -1  -2  233.78   17.10 
   9  -1  -2  215.48   16.90 
  -9  -1   2  212.28   14.80 
   9   1  -2  219.38   15.40 
   9   1  -2  209.88   15.80 
  -9   1   2  201.08   16.50 
  -9   1   2  221.98   15.30 
  -9   1   2  225.38   16.50 
  -9   1   2  214.48   15.30 
  -8  -1   2   18.20    4.70 
   8  -1  -2   17.50    5.20 
  -8  -1   2   20.60    4.90 
  -8  -1   2   27.90    6.80 
   8  -1  -2   15.80    5.00 
   8   1  -2   27.70    6.20 
  -8   1   2   12.90    4.90 
  -8   1   2   17.10    5.40 
   8   1  -2   26.90    6.20 
   7  -1  -2   16.30    4.70 
   7  -1  -2   14.70    4.40 
  -7  -1   2    8.80    3.10 
  -7  -1   2   18.00    4.80 
  -7  -1   2   12.70    4.30 
   7   1  -2   15.60    4.70 
  -7   1   2    9.00    3.70 
  -7   1   2   21.20    5.30 
   7   1  -2   19.10    4.90 
   6  -1  -2   58.79    6.90 
  -6  -1   2   72.09    6.70 
   6  -1  -2   64.99    7.70 
  -6  -1   2   72.69    7.70 
  -6   1   2   55.59    6.50 
  -6   1   2   74.29    8.00 
   6   1  -2   64.79    7.20 
   6   1  -2   75.79    7.20 
  -5  -1   2    4.40    2.00 
  -5  -1   2    7.20    2.70 
   5  -1  -2    3.30    2.30 
   5  -1  -2    0.70    2.10 
  -5   1   2    5.20    2.70 
   5   1  -2    3.70    2.00 
  -5   1   2    7.50    2.60 
   5   1  -2    7.80    2.90 
   4  -1  -2    1.90    1.50 
  -4  -1   2    1.60    1.30 
  -4  -1   2   -0.30    0.90 
   4  -1  -2    0.60    1.60 
   4   1  -2   -1.40    0.90 
  -4   1   2    1.50    1.30 
   4   1  -2    0.10    0.90 
  -4   1   2   -0.50    1.40 
  -3  -1   2  743.33   16.70 
  -3  -1   2  741.93   19.70 
   3  -1  -2  730.83   19.50 
   3  -1  -2  731.13   21.50 
  -3   1   2  750.12   19.20 
   3   1  -2  717.43   19.80 
   3   1  -2  734.33   17.00 
  -3   1   2  770.82   22.40 
   2  -1  -2  238.88    9.20 
  -2  -1   2  247.28    8.80 
  -2  -1   2  244.28    6.40 
   2  -1  -2  222.28    9.70 
  -2   1   2  249.78    8.60 
   2   1  -2  238.28    6.60 
   2   1  -2  241.68    9.00 
  -2   1   2  245.38    9.90 
   1  -1  -2    0.50    0.80 
  -1  -1   2    0.70    0.60 
   1  -1  -2    1.30    0.70 
   1   1  -2    1.60    0.50 
   1   1  -2    0.30    0.60 
  -1   1   2    0.40    0.70 
  -1   1   2    0.60    0.60 
   0  -1  -2 1090.79   19.50 
   0   1  -2  914.51   18.10 
  -1  -1  -2  151.48    6.40 
   1  -1   2  171.28    6.10 
  -1  -1  -2  149.39    4.80 
   1  -1   2  164.18    6.80 
  -1   1  -2  157.38    6.90 
  -1   1  -2  155.28    7.10 
  -1   1  -2  162.28    7.40 
   1   1   2  164.88    5.10 
   1   1   2  168.68    6.50 
   2  -1   2  328.67   10.60 
  -2  -1  -2  315.27   10.60 
   2  -1   2  319.97   12.60 
  -2   1  -2  327.27   12.70 
   2   1   2  320.97   10.90 
  -2   1  -2  314.57   10.10 
   2   1   2  335.67    9.30 
  -3  -1  -2  110.89    6.50 
  -3  -1  -2  107.89    6.80 
   3  -1   2  100.89    7.70 
  -3  -1  -2  101.89    5.40 
   3  -1   2  112.39    6.90 
  -3  -1  -2  101.79    7.50 
  -3   1  -2  107.69    7.40 
  -3   1  -2  103.59    7.10 
   3   1   2   93.99    6.50 
  -3   1  -2  107.19    7.90 
  -3   1  -2   99.89    6.20 
   3   1   2  109.49    6.00 
   4  -1   2 1794.72   39.80 
  -4  -1  -2 1889.81   39.80 
  -4  -1  -2 1860.31   39.50 
  -4  -1  -2 1857.21   36.30 
  -4  -1  -2 1848.62   42.80 
   4  -1   2 1892.81   44.20 
  -4   1  -2 1834.42   43.80 
  -4   1  -2 1846.92   42.00 
  -4   1  -2 1840.12   38.50 
   4   1   2 1819.12   40.10 
  -4   1  -2 1818.22   40.90 
   4   1   2 1799.12   37.60 
  -5  -1  -2  537.45   21.80 
  -5  -1  -2  557.24   19.80 
   5  -1   2  575.74   23.10 
  -5  -1  -2  543.55   17.50 
  -5  -1  -2  566.64   20.30 
   5  -1   2  555.74   20.70 
  -5   1  -2  536.85   20.50 
  -5   1  -2  553.54   19.10 
  -5   1  -2  540.05   21.40 
  -5   1  -2  546.15   22.60 
   5   1   2  553.84   20.60 
  -6  -1  -2  840.82   27.00 
   6  -1   2  854.61   30.90 
  -6  -1  -2  843.02   24.50 
  -6  -1  -2  880.61   30.40 
  -6  -1  -2  852.61   27.80 
  -6   1  -2  825.92   28.10 
  -6   1  -2  824.52   29.30 
  -6   1  -2  829.42   26.00 
  -6   1  -2  828.42   30.60 
  -7  -1  -2  144.39    9.90 
  -7  -1  -2  130.99   11.10 
  -7  -1  -2  136.79   10.60 
  -7  -1  -2  133.39   11.90 
   7  -1   2  139.19   12.50 
  -7   1  -2  159.98   13.40 
  -7   1  -2  126.99    9.90 
  -7   1  -2  137.69   11.90 
  -7   1  -2  137.49   11.60 
   8  -1   2   83.89   10.40 
  -8  -1  -2   78.49    8.70 
  -8  -1  -2   88.09    8.40 
  -8  -1  -2   76.89   10.10 
  -8  -1  -2   91.19    9.60 
  -8   1  -2   89.49   10.60 
  -8   1  -2   90.39    8.90 
  -8   1  -2   85.69   10.40 
  -8   1  -2   79.39    9.10 
  -9  -1  -2   79.09    9.70 
  -9  -1  -2   79.69    8.60 
   9  -1   2   89.09   11.60 
  -9  -1  -2   68.89   11.70 
  -9  -1  -2   87.19    9.60 
  -9   1  -2   81.49    9.80 
  -9   1  -2   79.89    9.10 
  -9   1  -2   90.39   10.40 
 -10  -1  -2  129.99   12.70 
 -10  -1  -2  114.39   10.80 
 -10  -1  -2  121.39   13.10 
 -10   1  -2  146.39   13.70 
 -10   1  -2  130.99   12.00 
 -11  -1  -2   64.29   11.40 
 -11  -1  -2   52.89    7.40 
 -11   1  -2   58.59   10.10 
 -11   1  -2   51.19   10.20 
 -12  -1  -2   90.29   11.90 
 -12  -1  -2   71.19   10.00 
 -12   1  -2   82.19   10.80 
 -12   1  -2   73.39   12.60 
 -13  -1  -2   85.19   18.50 
 -13  -1  -2  105.39   12.40 
 -13   1  -2   90.49   14.90 
 -14  -1  -2   60.59   11.60 
 -14  -1  -2   57.89   11.90 
 -14   1  -2   60.99   12.10 
 -14   1  -2   53.39   10.60 
 -15  -1  -2   -2.40    4.00 
 -15  -1  -2    1.80    5.70 
 -15   1  -2    6.20    5.50 
 -15   1  -2    0.30    5.40 
 -16  -2   2  144.99   15.90 
 -16  -2   2  116.19   14.10 
 -16   2   2   91.29   15.40 
 -16   2   2  117.39   16.00 
 -15  -2   2  149.59   16.30 
 -15   2   2  139.09   15.30 
 -15   2   2  121.99   15.70 
  14  -2  -2  108.19   15.00 
  14  -2  -2   94.49   16.90 
 -14  -2   2  114.29   13.20 
 -14   2   2   76.89   13.90 
  14   2  -2  101.49   17.10 
 -14   2   2   99.49   13.10 
 -13  -2   2  300.27   21.30 
  13  -2  -2  274.67   23.20 
 -13  -2   2  305.17   20.00 
  13  -2  -2  314.47   24.40 
 -13   2   2  293.97   21.80 
 -13   2   2  305.07   23.20 
  13   2  -2  318.97   23.20 
 -12  -2   2   53.79   10.50 
  12  -2  -2   56.29   11.60 
  12  -2  -2   46.70   11.20 
 -12  -2   2   53.89    9.40 
 -12   2   2   69.79   12.80 
 -12   2   2   66.99   13.80 
  12   2  -2   83.89   11.80 
 -11  -2   2  308.47   20.00 
  11  -2  -2  317.67   22.60 
 -11  -2   2  335.57   19.10 
 -11  -2   2  326.27   20.20 
  11  -2  -2  335.87   23.80 
 -11   2   2  338.47   22.60 
  11   2  -2  328.27   21.70 
 -11   2   2  316.87   21.10 
 -10  -2   2  234.18   17.10 
  10  -2  -2  272.17   20.40 
  10  -2  -2  255.87   19.50 
 -10  -2   2  266.67   17.90 
 -10  -2   2  249.78   20.40 
 -10   2   2  274.07   19.80 
 -10   2   2  262.67   18.40 
  10   2  -2  290.67   19.60 
   9  -2  -2   25.50    7.00 
  -9  -2   2   29.60    6.00 
  -9  -2   2   10.40    4.80 
  -9  -2   2   24.10    6.10 
   9  -2  -2   33.40    8.20 
  -9   2   2   25.70    6.30 
  -9   2   2   27.80    6.80 
   9   2  -2   36.10    7.10 
  -8  -2   2   79.39    7.50 
   8  -2  -2   79.99    9.90 
  -8  -2   2   85.29    8.20 
   8  -2  -2   78.99    9.30 
  -8  -2   2   66.09    8.40 
  -8   2   2   81.39    9.40 
  -8   2   2   74.89    9.90 
   8   2  -2   75.09    8.60 
   8   2  -2   78.39    8.10 
  -7  -2   2  125.99   10.20 
  -7  -2   2  142.59   10.00 
   7  -2  -2  136.49   11.50 
   7  -2  -2  124.39   11.60 
  -7  -2   2  134.99    9.10 
  -7   2   2  138.39   11.20 
   7   2  -2  133.39    9.90 
   7   2  -2  124.89   10.50 
  -7   2   2  137.49   12.30 
   6  -2  -2  243.78   14.50 
  -6  -2   2  208.48   12.50 
   6  -2  -2  234.98   15.10 
  -6  -2   2  243.58   12.10 
  -6  -2   2  219.98   10.80 
  -6   2   2  216.48   14.40 
   6   2  -2  213.68   12.90 
   6   2  -2  234.28   12.10 
  -6   2   2  222.98   13.40 
  -5  -2   2  154.28    9.70 
  -5  -2   2  161.08    8.60 
   5  -2  -2  169.88   11.10 
   5  -2  -2  168.58   11.80 
  -5  -2   2  165.28    8.20 
  -5   2   2  167.18   11.60 
   5   2  -2  154.08   10.00 
   5   2  -2  153.68    8.70 
  -5   2   2  168.18   10.70 
   4  -2  -2  290.87   14.40 
  -4  -2   2  298.37   14.70 
  -4  -2   2  276.97   10.00 
   4  -2  -2  277.67   13.20 
   4   2  -2  267.87   12.00 
  -4   2   2  279.37   12.70 
  -4   2   2  293.47   14.30 
   4   2  -2  287.97   10.40 
  -3  -2   2 1082.49   24.10 
  -3  -2   2 1084.29   20.30 
   3  -2  -2 1051.69   26.30 
   3  -2  -2 1068.59   28.20 
  -3   2   2 1052.79   27.80 
   3   2  -2 1058.09   24.60 
   3   2  -2 1079.79   20.60 
   2  -2  -2 1448.36   29.80 
  -2  -2   2 1487.95   27.30 
   2  -2  -2 1444.96   31.50 
  -2   2   2 1421.06   31.20 
  -2   2   2 1445.76   29.20 
   2   2  -2 1392.06   30.80 
  -1  -2   2  496.95   11.40 
   1  -2  -2  492.15   13.00 
   1  -2  -2  493.85   14.30 
  -1  -2   2  497.85    9.00 
   1   2  -2  495.65   11.70 
   1   2  -2  494.65    9.40 
  -1   2   2  507.55   13.80 
  -1   2   2  504.15   12.90 
   0  -2   2 9999.00  146.39 
  -1  -2  -2   12.80    1.30 
  -1  -2  -2    8.50    1.70 
   1  -2   2   12.40    2.60 
   1  -2   2   12.60    2.20 
   1   2   2   13.70    1.90 
  -1   2  -2   16.20    2.80 
   1   2   2   13.30    1.30 
  -1   2  -2   10.70    2.40 
  -1   2  -2   12.80    2.10 
   2  -2   2  917.41   21.70 
  -2  -2  -2  961.90   17.30 
   2  -2   2  933.91   24.60 
  -2  -2  -2  933.81   21.00 
   2   2   2  960.50   17.80 
  -2   2  -2  922.81   23.00 
  -2   2  -2  924.71   21.30 
  -2   2  -2  946.91   25.40 
   2   2   2  923.11   21.20 
  -3  -2  -2  129.89    7.30 
   3  -2   2  140.69    9.50 
   3  -2   2  142.89    8.30 
  -3  -2  -2  142.19    5.90 
  -3  -2  -2  140.49    6.80 
   3   2   2  140.79    6.30 
  -3   2  -2  137.29    8.80 
  -3   2  -2  145.69    9.60 
  -3   2  -2  151.88    8.10 
  -3   2  -2  144.09    8.80 
   3   2   2  141.39    7.80 
   4  -2   2  900.21   25.90 
  -4  -2  -2  906.91   20.90 
   4  -2   2  909.01   28.70 
  -4  -2  -2  934.81   27.20 
  -4  -2  -2  923.31   23.50 
  -4  -2  -2  913.71   24.20 
  -4   2  -2  920.01   28.70 
   4   2   2  911.11   22.40 
  -4   2  -2  895.81   27.40 
  -4   2  -2  906.61   26.80 
  -4   2  -2  900.01   24.60 
   4   2   2  887.71   24.60 
  -5  -2  -2 3132.29   65.59 
   5  -2   2 3237.18   69.19 
  -5  -2  -2 3224.28   61.59 
  -5  -2  -2 3195.88   56.99 
   5  -2   2 3107.09   64.79 
  -5  -2  -2 3203.58   61.29 
  -5   2  -2 3221.08   62.29 
  -5   2  -2 3174.58   65.29 
   5   2   2 3213.58   62.69 
  -5   2  -2 3210.78   67.19 
  -5   2  -2 3160.48   68.49 
  -6  -2  -2   31.60    6.40 
  -6  -2  -2   42.30    5.70 
  -6  -2  -2   33.40    5.90 
   6  -2   2   40.20    8.10 
  -6  -2  -2   32.00    4.30 
  -6   2  -2   47.50    8.50 
  -6   2  -2   37.90    6.50 
  -6   2  -2   41.70    7.40 
   6   2   2   25.20    5.00 
  -6   2  -2   34.40    6.60 
  -7  -2  -2   11.40    3.50 
  -7  -2  -2   17.70    5.20 
  -7  -2  -2   19.10    5.20 
  -7  -2  -2   13.30    3.70 
  -7   2  -2    6.20    3.60 
  -7   2  -2   16.00    4.40 
  -7   2  -2   15.10    6.20 
   8  -2   2  152.38   14.30 
  -8  -2  -2  175.78   11.40 
  -8  -2  -2  198.28   18.60 
  -8  -2  -2  165.18   12.80 
  -8   2  -2  206.38   16.40 
  -8   2  -2  217.28   14.30 
  -8   2  -2  180.88   15.20 
  -8   2  -2  170.68   13.80 
  -9  -2  -2    0.60    3.60 
   9  -2   2    7.00    3.90 
  -9  -2  -2    3.10    2.80 
  -9   2  -2   -2.00    1.90 
  -9   2  -2    5.50    3.70 
 -10  -2  -2    7.70    4.70 
 -10  -2  -2    6.20    3.70 
 -10  -2  -2   -2.30    2.40 
 -10   2  -2    4.30    3.30 
 -10   2  -2    3.20    3.40 
 -11  -2  -2   28.40    7.30 
 -11  -2  -2    6.70    3.90 
 -11   2  -2   16.50    6.20 
 -11   2  -2   15.40    6.30 
 -12  -2  -2   71.39    9.10 
 -12  -2  -2   75.39   12.50 
 -12   2  -2   47.50   10.10 
 -12   2  -2   56.79   10.70 
 -13  -2  -2    6.50    5.20 
 -13  -2  -2   17.60    6.10 
 -13   2  -2   12.90    6.80 
 -13   2  -2   16.20    6.90 
 -14  -2  -2    8.70    5.20 
 -14  -2  -2   13.60    6.80 
 -14   2  -2   15.50    6.70 
 -14   2  -2   21.00    6.60 
 -15  -2  -2   46.40   10.20 
 -15  -2  -2   89.49   14.90 
 -15   2  -2   62.69   12.70 
 -15   2  -2   57.59   12.00 
  15  -3  -2   89.59   15.80 
 -15  -3   2   80.89   13.00 
 -15  -3   2   85.19   11.70 
 -15   3   2   68.49   13.00 
 -15   3   2  107.09   14.30 
  14  -3  -2  130.59   16.70 
  14  -3  -2   88.29   16.20 
 -14  -3   2  123.39   13.70 
 -14  -3   2  119.59   14.50 
 -14   3   2  113.59   18.00 
  14   3  -2  148.59   16.00 
 -14   3   2  113.49   14.70 
 -13  -3   2   -2.30    3.00 
  13  -3  -2   -2.00    5.20 
 -13  -3   2   -4.90    3.50 
  13  -3  -2   -4.10    3.70 
 -13   3   2    9.10    5.30 
  13   3  -2   -0.20    4.30 
 -13   3   2    2.10    4.10 
 -12  -3   2  180.78   14.30 
  12  -3  -2  217.88   20.40 
  12  -3  -2  205.68   20.00 
 -12  -3   2  187.88   15.90 
  12   3  -2  185.48   16.90 
 -12   3   2  180.48   17.90 
 -12   3   2  204.58   18.00 
 -11  -3   2  598.34   27.20 
 -11  -3   2  607.94   28.10 
  11  -3  -2  543.15   31.20 
  11  -3  -2  657.83   33.80 
 -11  -3   2  606.24   25.20 
 -11   3   2  539.95   29.50 
 -11   3   2  615.04   30.90 
  11   3  -2  591.14   29.10 
  10  -3  -2   26.40    7.80 
 -10  -3   2   35.30    7.30 
  10  -3  -2   37.10    8.90 
 -10  -3   2   32.00    6.10 
 -10  -3   2   32.90    7.40 
 -10  -3   2   33.10    7.10 
  10   3  -2   34.10    7.40 
 -10   3   2   23.40    7.10 
   9  -3  -2  371.36   23.40 
  -9  -3   2  394.96   19.30 
  -9  -3   2  389.86   20.40 
  -9  -3   2  402.86   18.00 
   9  -3  -2  365.66   22.60 
   9   3  -2  394.86   21.00 
  -9   3   2  418.76   23.80 
  -9   3   2  407.26   22.70 
  -8  -3   2 1570.64   43.40 
   8  -3  -2 1578.14   49.80 
   8  -3  -2 1601.14   55.29 
  -8  -3   2 1669.23   41.90 
  -8  -3   2 1653.83   39.30 
   8   3  -2 1588.44   44.20 
  -8   3   2 1547.15   49.50 
  -8   3   2 1576.34   46.70 
   7  -3  -2  118.69   14.20 
  -7  -3   2  128.09    9.20 
  -7  -3   2  137.49    8.80 
  -7  -3   2  134.49   10.20 
   7  -3  -2  131.99   11.80 
  -7   3   2  123.99   11.00 
   7   3  -2  111.59    9.70 
  -7   3   2  109.89   15.40 
  -6  -3   2 1480.35   34.10 
  -6  -3   2 1460.45   36.50 
   6  -3  -2 1490.55   41.50 
   6  -3  -2 1423.26   42.30 
  -6  -3   2 1494.25   32.20 
  -6   3   2 1456.75   40.00 
   6   3  -2 1433.56   37.10 
  -6   3   2 1405.96   42.30 
   5  -3  -2 3928.11   76.49 
   5  -3  -2 3820.72   78.19 
  -5  -3   2 3881.41   66.19 
  -5  -3   2 3869.81   69.79 
  -5  -3   2 3889.51   64.09 
   5   3  -2 3824.42   70.89 
  -5   3   2 3786.12   77.89 
  -5   3   2 3865.41   74.59 
  -4  -3   2  105.19    5.40 
   4  -3  -2  108.49    8.90 
   4  -3  -2   98.59    8.00 
  -4  -3   2  105.79    6.70 
  -4  -3   2  107.69    5.00 
  -4   3   2  106.19    8.80 
  -4   3   2  103.89    7.90 
   4   3  -2  103.99    7.10 
   3  -3  -2  647.04   21.50 
  -3  -3   2  672.83   13.10 
   3  -3  -2  650.93   20.40 
  -3  -3   2  671.53   12.30 
  -3  -3   2  674.93   16.80 
   3   3  -2  646.34   17.30 
  -3   3   2  650.53   21.40 
  -3   3   2  681.53   20.20 
   2  -3  -2  575.44   18.20 
  -2  -3   2  591.84   13.60 
   2  -3  -2  587.54   17.40 
  -2   3   2  558.94   18.40 
  -2   3   2  582.64   17.10 
   1  -3  -2 2421.96   43.00 
  -1  -3   2 2414.16   38.50 
  -1  -3   2 2413.56   37.00 
   1  -3  -2 2373.46   43.40 
  -1   3   2 2439.06   42.50 
   1   3  -2 2168.38   41.20 
  -1   3   2 2324.47   42.90 
   1   3  -2 2392.16   36.70 
   0  -3   2 6443.86   97.09 
   0  -3  -2 6429.76   96.19 
   0  -3  -2 6373.06   97.39 
   0   3   2 6315.17   97.09 
   0   3  -2 6297.37   96.69 
   0   3   2 6339.57   95.59 
   0   3  -2 6301.77   95.09 
  -1  -3  -2   96.59    3.80 
   1  -3   2  101.09    6.30 
   1  -3   2   99.39    5.50 
  -1  -3  -2   98.19    5.30 
   1   3   2   89.99    5.00 
   1   3   2   94.79    3.50 
  -1   3  -2   95.19    6.20 
  -1   3  -2   93.19    5.20 
   2  -3   2  135.59    8.70 
   2  -3   2  140.49    7.60 
  -2  -3  -2  140.79    4.30 
  -2  -3  -2  137.19    6.80 
  -2   3  -2  143.49    7.50 
   2   3   2  142.59    6.90 
   2   3   2  141.89    4.50 
  -2   3  -2  142.49    8.80 
  -3  -3  -2  116.69    5.70 
   3  -3   2  119.39    7.90 
   3  -3   2  114.59    8.70 
  -3  -3  -2  112.49    4.70 
  -3  -3  -2  113.09    6.70 
   3   3   2  116.99    5.20 
  -3   3  -2  125.39    7.70 
   3   3   2  119.89    7.00 
  -3   3  -2  110.09    8.60 
  -3   3  -2  125.69    8.70 
  -4  -3  -2 1327.27   25.90 
  -4  -3  -2 1327.17   28.60 
   4  -3   2 1339.97   34.10 
   4  -3   2 1279.07   36.40 
  -4  -3  -2 1286.37   30.20 
  -4   3  -2 1343.97   36.10 
   4   3   2 1310.27   31.10 
  -4   3  -2 1313.67   32.30 
  -4   3  -2 1298.07   36.40 
   5  -3   2  184.28   12.20 
  -5  -3  -2  200.28   10.80 
  -5  -3  -2  189.88    8.60 
  -5  -3  -2  189.98   10.10 
  -5  -3  -2  184.38   11.80 
   5  -3   2  185.28   13.40 
  -5   3  -2  200.38   13.60 
   5   3   2  199.38   11.20 
  -5   3  -2  183.58   11.30 
  -5   3  -2  192.28   13.00 
  -5   3  -2  194.08   12.80 
  -6  -3  -2  359.36   16.00 
  -6  -3  -2  370.46   16.10 
  -6  -3  -2  343.17   17.90 
   6  -3   2  383.76   20.60 
  -6  -3  -2  364.36   13.70 
  -6   3  -2  355.76   18.60 
  -6   3  -2  390.06   20.60 
  -6   3  -2  348.67   19.30 
  -6   3  -2  382.26   17.70 
   6   3   2  356.36   16.70 
  -7  -3  -2 1192.68   30.10 
   7  -3   2 1205.28   41.40 
  -7  -3  -2 1177.48   33.80 
  -7  -3  -2 1154.08   37.40 
  -7  -3  -2 1177.58   33.70 
  -7   3  -2 1172.18   39.90 
  -7   3  -2 1218.68   38.70 
  -7   3  -2 1045.20   41.40 
  -7   3  -2 1153.08   40.30 
  -8  -3  -2  242.28   12.90 
  -8  -3  -2  226.48   14.30 
  -8  -3  -2  229.48   20.10 
   8  -3   2  248.38   18.70 
  -8  -3  -2  242.58   14.80 
  -8   3  -2  231.68   17.60 
  -8   3  -2  213.58   15.90 
  -8   3  -2  236.78   18.10 
  -8   3  -2  235.48   15.60 
  -9  -3  -2   70.79    7.50 
  -9  -3  -2  110.39   10.90 
   9  -3   2   82.39   11.40 
  -9  -3  -2  108.99   10.20 
  -9  -3  -2  107.59   10.20 
  -9   3  -2   98.59   10.60 
  -9   3  -2   74.69   10.20 
  10  -3   2  784.62   37.80 
 -10  -3  -2  821.12   32.60 
 -10  -3  -2  787.52   28.00 
 -10  -3  -2  812.62   31.40 
 -10   3  -2  793.52   32.40 
 -10   3  -2  810.12   35.50 
  11  -3   2  219.08   19.70 
 -11  -3  -2  168.58   18.20 
 -11  -3  -2  147.79   11.90 
 -11  -3  -2  184.38   14.80 
 -11   3  -2  171.58   15.60 
 -11   3  -2  173.58   16.60 
 -12  -3  -2  357.16   22.10 
 -12  -3  -2  311.07   18.40 
 -12   3  -2  301.87   21.10 
 -12   3  -2  311.97   37.90 
 -13  -3  -2  346.57   20.80 
 -13  -3  -2  353.36   23.20 
 -13   3  -2  353.66   23.60 
 -13   3  -2  329.37   24.70 
 -14  -3  -2   93.29   12.50 
 -14  -3  -2   93.99   11.10 
 -14   3  -2  127.39   15.70 
 -14   3  -2  107.69   13.60 
 -15  -3  -2   45.00    9.80 
 -15  -3  -2   28.70    7.70 
 -15   3  -2   29.30    8.00 
 -15   3  -2   24.80    9.00 
  15  -4  -2   38.90   11.20 
 -15  -4   2   39.20    9.20 
 -15  -4   2   35.00    8.30 
 -15   4   2   28.30    9.70 
 -15   4   2   32.30   10.20 
 -14  -4   2    4.70    4.00 
  14  -4  -2   -2.30    6.40 
 -14  -4   2    6.80    4.60 
  14  -4  -2    5.10    6.10 
 -14   4   2    5.20    4.50 
 -14   4   2    6.80    6.70 
  13  -4  -2    5.80    5.40 
  13  -4  -2    5.10    6.10 
 -13  -4   2    1.50    4.00 
 -13  -4   2    7.60    3.80 
 -13   4   2    7.50    5.50 
  13   4  -2   11.60    5.10 
 -13   4   2   10.90    5.80 
 -12  -4   2   -1.60    3.60 
 -12  -4   2    4.30    2.80 
 -12  -4   2    3.70    3.60 
  12  -4  -2   -6.80    4.00 
  12  -4  -2   -5.40    5.50 
  12   4  -2   10.50    4.80 
 -12   4   2   -1.30    3.30 
 -11  -4   2   -3.20    3.20 
 -11  -4   2    0.10    2.30 
  11  -4  -2    4.60    4.50 
  11  -4  -2    2.10    4.30 
 -11  -4   2   -3.10    2.30 
 -11  -4   2    2.60    2.90 
 -11   4   2   -2.80    2.70 
  11   4  -2    7.70    4.10 
 -10  -4   2   -3.60    1.60 
 -10  -4   2    6.10    3.10 
 -10  -4   2   -4.80    2.40 
 -10  -4   2   -1.00    1.40 
  10  -4  -2    0.60    3.10 
  10  -4  -2    4.30    3.30 
 -10   4   2    0.40    2.50 
  -9  -4   2    6.20    2.60 
  -9  -4   2   -2.70    2.80 
  -9  -4   2    0.10    2.40 
   9  -4  -2    3.40    3.80 
   9  -4  -2   -2.10    3.00 
  -9   4   2    5.20    3.60 
   9   4  -2    1.40    2.20 
  -8  -4   2    2.30    2.30 
   8  -4  -2    0.70    2.80 
  -8  -4   2   -4.00    1.80 
   8  -4  -2   -3.20    1.80 
  -8  -4   2    1.50    1.70 
  -8   4   2    1.50    2.10 
   8   4  -2   -0.90    1.90 
  -8   4   2    1.40    2.70 
  -8   4   2   -5.00    2.30 
  -7  -4   2  148.99   10.30 
  -7  -4   2  131.29    9.00 
  -7  -4   2  132.39    8.30 
   7  -4  -2  152.18   13.50 
   7  -4  -2  127.69   12.00 
  -7   4   2  138.69   12.10 
  -7   4   2  140.69   13.00 
   7   4  -2  127.79   10.00 
  -6  -4   2    2.20    1.60 
  -6  -4   2    4.20    2.20 
   6  -4  -2    0.40    2.20 
   6  -4  -2    2.20    2.20 
  -6   4   2    7.20    2.90 
   6   4  -2    7.60    2.80 
  -6   4   2    5.70    2.80 
   5  -4  -2  835.82   28.80 
   5  -4  -2  827.32   29.70 
  -5  -4   2  876.61   19.30 
  -5  -4   2  868.31   23.10 
  -5  -4   2  874.41   21.00 
   5   4  -2  852.61   24.10 
  -5   4   2  836.92   27.70 
  -5   4   2  832.32   29.80 
   4  -4  -2  131.79    9.80 
   4  -4  -2  122.69    9.90 
  -4  -4   2  131.79    4.90 
  -4  -4   2  132.89    5.80 
  -4  -4   2  126.69    6.90 
   4   4  -2  126.39    7.40 
  -4   4   2  112.69    9.50 
  -4   4   2  112.59    8.70 
   3  -4  -2   30.30    5.40 
  -3  -4   2   35.30    3.10 
   3  -4  -2   29.90    5.20 
  -3   4   2   33.80    4.40 
  -3   4   2   37.00    5.00 
   3   4  -2   34.20    3.40 
  -2  -4   2  304.97    8.60 
   2  -4  -2  299.57   13.00 
   2  -4  -2  288.37   12.40 
   2   4  -2  279.67   10.70 
  -2   4   2  295.27   12.20 
  -2   4   2  286.37   12.60 
  -1  -4   2  442.36   10.80 
   1  -4  -2  426.36   14.10 
  -1  -4   2  435.46   10.60 
   1  -4  -2  446.86   14.40 
   1   4  -2  437.46   10.20 
   1   4  -2  436.46   10.90 
  -1   4   2  413.06   13.80 
  -1   4   2  409.66   16.20 
   0  -4  -2  548.65   14.60 
   0  -4  -2  561.34   15.40 
   0  -4   2  565.24   13.90 
   0  -4   2  548.45   15.60 
   0   4  -2  547.15   13.40 
   0   4  -2  561.54   14.80 
   0   4   2  529.75   14.90 
   0   4   2  565.34   14.10 
   1  -4   2 2130.49   42.40 
  -1  -4  -2 2165.18   39.30 
   1  -4   2 2129.99   40.50 
  -1  -4  -2 2197.08   35.10 
  -1   4  -2 2123.09   39.00 
   1   4   2 2121.29   38.90 
  -1   4  -2 2087.99   41.90 
   1   4   2 2181.78   34.20 
   2  -4   2 1791.72   40.80 
   2  -4   2 1905.01   38.80 
  -2  -4  -2 1847.02   35.40 
  -2  -4  -2 1870.41   29.00 
  -2   4  -2 1840.92   40.80 
   2   4   2 1893.31   28.60 
  -2   4  -2 1846.52   37.30 
   2   4   2 1819.92   39.20 
  -3  -4  -2   24.50    3.90 
   3  -4   2   24.70    4.30 
  -3  -4  -2   27.10    2.40 
  -3  -4  -2   27.40    1.90 
   3  -4   2   21.10    4.40 
  -3   4  -2   24.30    4.50 
   3   4   2   22.80    3.20 
  -3   4  -2   28.50    4.80 
   3   4   2   24.80    2.10 
  -3   4  -2   30.00    5.80 
  -4  -4  -2   37.40    4.30 
  -4  -4  -2   36.20    3.50 
  -4  -4  -2   38.40    2.90 
   4  -4   2   39.90    7.10 
   4  -4   2   33.70    5.90 
  -4   4  -2   44.30    5.80 
   4   4   2   33.80    4.20 
  -4   4  -2   36.50    4.90 
  -4   4  -2   34.80    6.30 
  -5  -4  -2    0.30    1.40 
  -5  -4  -2    0.80    1.60 
   5  -4   2    4.50    2.20 
   5  -4   2    0.00    1.20 
  -5  -4  -2    0.10    1.00 
  -5   4  -2   -0.90    1.60 
   5   4   2    0.20    1.50 
  -5   4  -2    3.20    2.00 
  -5   4  -2    1.80    1.90 
   6  -4   2   -2.40    1.90 
  -6  -4  -2    3.10    2.70 
  -6  -4  -2   -1.00    1.30 
  -6  -4  -2    0.40    1.40 
  -6  -4  -2    0.80    1.40 
  -6   4  -2    0.50    1.40 
  -6   4  -2    1.70    3.20 
  -6   4  -2    1.30    2.00 
  -6   4  -2   -1.20    2.20 
   6   4   2    0.10    1.60 
  -7  -4  -2  128.19   11.30 
  -7  -4  -2  143.09   10.10 
   7  -4   2  140.99   13.40 
  -7  -4  -2  144.79    8.60 
  -7  -4  -2  132.39    9.60 
  -7   4  -2  119.59   10.70 
  -7   4  -2  122.19   12.50 
  -7   4  -2  148.79   13.00 
  -7   4  -2  136.69   12.80 
   7   4   2  141.19   10.90 
  -8  -4  -2  723.63   22.70 
  -8  -4  -2  698.93   25.80 
  -8  -4  -2  676.73   25.40 
   8  -4   2  696.63   32.90 
  -8  -4  -2  718.13   29.80 
  -8   4  -2  708.43   28.40 
  -8   4  -2  698.33   30.60 
  -8   4  -2  645.24   37.10 
   9  -4   2  612.14   32.20 
  -9  -4  -2  613.64   25.20 
  -9  -4  -2  605.64   25.20 
  -9  -4  -2  542.45   21.00 
  -9  -4  -2  609.44   28.60 
  -9   4  -2  670.23   31.00 
  -9   4  -2  656.03   28.30 
  10  -4   2   10.10    5.30 
 -10  -4  -2    0.50    2.50 
 -10   4  -2    4.80    3.60 
 -10   4  -2    1.80    3.00 
 -11  -4  -2   21.80    6.40 
 -11  -4  -2   13.10    4.10 
  11  -4   2   13.60    5.50 
 -11   4  -2   22.50    7.20 
 -11   4  -2    8.80    5.60 
 -12  -4  -2  157.68   12.50 
  12  -4   2  131.79   17.20 
 -12  -4  -2  133.39   13.60 
 -12   4  -2  147.49   16.70 
 -12   4  -2  124.09   16.80 
 -13  -4  -2   46.30    9.70 
 -13  -4  -2   29.60    6.70 
 -13   4  -2   26.90    8.40 
 -13   4  -2   30.20    9.20 
 -14  -4  -2    5.30    4.20 
 -14  -4  -2    2.60    4.50 
 -14   4  -2   12.20    5.80 
 -14   4  -2    3.50    4.50 
 -15  -4  -2    7.60    5.90 
 -15   4  -2    9.50    5.00 
 -15   4  -2   -4.60    4.90 
  15  -5  -2  188.08   21.70 
 -15  -5   2  184.08   18.90 
 -15  -5   2  173.48   15.30 
 -15   5   2  176.98   19.60 
 -15   5   2  123.79   17.10 
  14  -5  -2  273.77   24.60 
 -14  -5   2  279.07   19.60 
 -14  -5   2  231.78   16.50 
  14  -5  -2  234.08   23.30 
 -14   5   2  216.08   22.30 
 -14   5   2  212.18   20.40 
  13  -5  -2   -3.20    4.00 
 -13  -5   2   -1.50    2.40 
 -13  -5   2    3.90    3.70 
  13  -5  -2   -0.70    4.80 
 -13   5   2    9.80    5.40 
  13   5  -2   -1.30    3.30 
 -13   5   2    2.90    5.40 
  12  -5  -2  238.88   21.80 
 -12  -5   2  215.48   15.90 
  12  -5  -2  206.88   20.80 
 -12  -5   2  227.88   16.50 
 -12  -5   2  205.08   14.00 
  12   5  -2  210.78   16.90 
 -12   5   2  192.58   19.40 
 -12   5   2  217.08   19.70 
 -11  -5   2  191.78   20.30 
 -11  -5   2  218.88   15.20 
  11  -5  -2  211.48   19.60 
  11  -5  -2  245.58   21.10 
 -11  -5   2  225.18   15.80 
  11   5  -2  219.28   16.10 
 -11   5   2  231.08   19.30 
  10  -5  -2  242.88   20.20 
 -10  -5   2  238.48   15.50 
  10  -5  -2  258.37   20.80 
 -10   5   2  259.87   19.90 
  10   5  -2  246.18   16.60 
   9  -5  -2  380.86   24.30 
   9  -5  -2  380.96   24.70 
  -9  -5   2  378.06   18.90 
  -9  -5   2  381.86   16.30 
  -9  -5   2  406.06   18.70 
   9   5  -2  371.56   19.50 
  -9   5   2  417.16   24.60 
   8  -5  -2  684.83   32.00 
  -8  -5   2  634.04   23.70 
   8  -5  -2  702.43   31.70 
  -8  -5   2  663.43   23.20 
  -8  -5   2  683.13   21.00 
   8   5  -2  674.43   25.10 
  -8   5   2  672.83   30.50 
  -8   5   2  663.53   29.50 
  -7  -5   2   12.80    3.10 
   7  -5  -2   12.40    4.70 
  -7  -5   2   11.00    3.10 
   7  -5  -2   18.50    5.60 
  -7  -5   2   19.40    4.20 
  -7   5   2   11.30    4.20 
  -7   5   2   13.30    5.10 
   7   5  -2   17.80    4.40 
  -6  -5   2  293.37   12.90 
   6  -5  -2  305.47   18.70 
  -6  -5   2  299.77   10.60 
   6  -5  -2  294.07   17.80 
  -6  -5   2  289.67   12.10 
  -6   5   2  297.67   18.90 
  -6   5   2  306.57   17.30 
   6   5  -2  295.27   13.70 
   5  -5  -2 1498.55   42.90 
   5  -5  -2 1443.66   41.40 
  -5  -5   2 1373.96   41.70 
  -5  -5   2 1488.75   29.90 
  -5  -5   2 1507.95   27.50 
   5   5  -2 1458.75   33.30 
  -5   5   2 1503.45   43.10 
  -5   5   2 1459.85   39.90 
   4  -5  -2    7.70    3.20 
  -4  -5   2    8.80    1.40 
  -4  -5   2    6.40    1.80 
  -4  -5   2    7.40    1.80 
   4  -5  -2    7.60    2.80 
   4   5  -2    5.90    2.10 
  -4   5   2    4.70    2.80 
  -4   5   2   11.00    3.20 
  -3  -5   2   46.30    3.30 
   3  -5  -2   38.70    6.60 
   3  -5  -2   40.00    5.30 
  -3   5   2   40.30    5.10 
  -3   5   2   45.20    5.60 
   3   5  -2   43.70    3.60 
  -2  -5   2  706.13   15.00 
   2  -5  -2  711.83   22.20 
   2  -5  -2  681.53   21.60 
  -2  -5   2  713.93   13.90 
  -2   5   2  681.23   20.90 
  -2   5   2  699.33   22.00 
   2   5  -2  701.33   13.10 
   2   5  -2  735.33   16.10 
   1  -5  -2    9.40    2.70 
  -1  -5   2   16.30    2.10 
   1  -5  -2   12.60    2.90 
  -1  -5   2   14.20    2.40 
   1   5  -2   15.70    2.10 
  -1   5   2   13.40    3.00 
   1   5  -2   18.30    2.20 
   0  -5  -2 1229.18   27.60 
   0  -5  -2 1224.48   25.90 
   0  -5   2 1235.08   25.30 
   0  -5   2 1249.07   27.30 
   0   5   2 1250.87   27.20 
   0   5   2 1221.98   25.50 
   0   5  -2 1215.78   24.60 
   0   5  -2 1212.98   26.50 
   1  -5   2 6458.25  102.89 
  -1  -5  -2 6572.44  102.49 
   1  -5   2 6465.85  106.29 
  -1  -5  -2 6541.15   96.99 
   1   5   2 6488.15  102.69 
  -1   5  -2 6471.95  101.89 
   1   5   2 6614.94   96.09 
  -1   5  -2 6353.56  112.19 
   2  -5   2 1052.09   26.90 
  -2  -5  -2 1047.00   24.20 
   2  -5   2 1050.89   29.40 
  -2   5  -2 1049.20   25.90 
  -2   5  -2 1069.29   28.80 
   2   5   2 1063.29   24.20 
  -2   5  -2 1018.80   28.40 
   3  -5   2  126.49    9.80 
  -3  -5  -2  119.39    7.10 
   3  -5   2  118.69    8.80 
  -3   5  -2  121.49    8.20 
  -3   5  -2  115.19    9.20 
  -3   5  -2  113.19    9.30 
   3   5   2  122.39    7.20 
  -4  -5  -2  230.18    6.50 
  -4  -5  -2  224.18    7.90 
  -4  -5  -2  220.08   10.40 
   4  -5   2  222.98   14.20 
   4  -5   2  217.08   12.90 
  -4   5  -2  205.28   13.40 
   4   5   2  219.88   10.80 
  -4   5  -2  208.18   13.50 
  -4   5  -2  223.08   12.30 
  -5  -5  -2  593.64   14.30 
   5  -5   2  533.25   23.10 
  -5  -5  -2  586.44   16.50 
   5  -5   2  594.64   25.90 
  -5  -5  -2  590.34   19.10 
   5   5   2  565.74   19.70 
  -5   5  -2  557.44   24.70 
  -5   5  -2  598.64   22.30 
  -5   5  -2  575.34   24.90 
  -6  -5  -2   23.90    3.00 
  -6  -5  -2   29.60    5.90 
  -6  -5  -2   21.30    4.30 
  -6  -5  -2   21.90    5.70 
  -6   5  -2   29.50    6.90 
  -6   5  -2   32.10    7.90 
   6   5   2   29.20    5.70 
   7  -5   2    4.60    3.30 
  -7  -5  -2    3.40    1.90 
  -7  -5  -2    2.30    2.10 
  -7  -5  -2    3.80    2.60 
  -7  -5  -2    5.70    2.90 
  -7   5  -2    1.30    2.10 
   7   5   2    4.00    2.40 
  -7   5  -2    9.80    4.00 
  -7   5  -2   10.20    4.00 
  -7   5  -2    3.80    2.40 
   8  -5   2   -2.40    2.70 
  -8  -5  -2   -0.20    2.70 
  -8   5  -2    1.50    3.00 
  -8   5  -2   -5.60    2.40 
  -9  -5  -2   93.89    9.30 
   9  -5   2   96.09   13.30 
  -9  -5  -2  103.49    7.90 
  -9  -5  -2   99.19   10.60 
  -9  -5  -2  101.69    9.60 
  -9   5  -2  101.39   11.30 
  -9   5  -2   92.69   12.00 
 -10  -5  -2  250.67   13.80 
 -10  -5  -2  287.37   20.80 
 -10  -5  -2  299.97   17.60 
  10  -5   2  312.37   23.40 
 -10  -5  -2  306.27   17.80 
 -10   5  -2  296.47   21.80 
 -10   5  -2  300.57   19.90 
 -11  -5  -2    0.30    3.70 
  11  -5   2   -0.60    4.60 
 -11  -5  -2    5.50    3.30 
 -11  -5  -2    3.60    2.70 
 -11   5  -2    9.00    5.10 
 -11   5  -2    1.90    4.20 
 -12  -5  -2  301.97   19.60 
  12  -5   2  276.17   24.50 
 -12  -5  -2  313.87   23.50 
 -12  -5  -2  275.77   16.00 
 -12   5  -2  316.27   22.40 
 -12   5  -2  289.37   23.40 
  13  -5   2   71.39   14.90 
 -13  -5  -2   61.99    8.40 
 -13  -5  -2   53.09   10.70 
 -13   5  -2   56.79   11.90 
 -13   5  -2   79.09   13.90 
 -14  -5  -2   -1.40    4.30 
 -14   5  -2   16.20    5.80 
 -14   5  -2    5.40    5.30 
 -15  -5  -2   16.70    5.70 
 -15  -5  -2    8.20    5.90 
 -15   5  -2   26.50    8.40 
 -15   5  -2   11.50    7.00 
  15  -6  -2   -0.40    7.40 
 -15  -6   2   10.50    4.90 
 -15  -6   2    9.60    5.10 
 -15   6   2    2.60    5.90 
 -15   6   2    5.10    5.90 
  14  -6  -2   79.09   16.20 
 -14  -6   2   71.39   11.50 
 -14  -6   2   87.69   10.20 
  14  -6  -2   84.89   17.10 
 -14   6   2  103.19   14.70 
 -14   6   2   69.29   15.10 
  13  -6  -2  384.66   29.40 
  13  -6  -2  392.96   29.30 
 -13  -6   2  395.06   21.90 
 -13  -6   2  377.96   19.60 
  13   6  -2  343.47   21.60 
 -13   6   2  377.86   27.30 
 -13   6   2  372.26   27.20 
 -12  -6   2  351.96   19.90 
  12  -6  -2  362.56   27.10 
  12  -6  -2  331.47   39.00 
 -12  -6   2  363.16   20.60 
 -12  -6   2  351.06   18.00 
 -12  -6   2  375.66   22.20 
 -12   6   2  367.56   25.70 
  12   6  -2  339.37   20.80 
 -11  -6   2  114.19   10.50 
 -11  -6   2  119.69    9.50 
  11  -6  -2   90.39   16.30 
 -11  -6   2  103.69   10.50 
 -11  -6   2  114.69   10.90 
  11  -6  -2   97.29   16.50 
 -11   6   2  106.69   13.80 
  11   6  -2  133.89   12.20 
  10  -6  -2  406.36   27.00 
 -10  -6   2  409.86   19.50 
 -10  -6   2  345.87   18.50 
 -10  -6   2  335.37   15.80 
  10  -6  -2  371.26   26.00 
 -10  -6   2  379.66   19.20 
  10   6  -2  400.16   20.60 
 -10   6   2  421.26   25.90 
   9  -6  -2 1502.65   52.29 
  -9  -6   2 1491.55   39.30 
  -9  -6   2 1226.28   33.20 
   9  -6  -2 1505.85   52.89 
  -9  -6   2 1486.75   39.60 
   9   6  -2 1478.35   41.20 
  -9   6   2 1532.95   50.39 
  -8  -6   2   24.60    4.80 
   8  -6  -2   24.30    7.10 
   8  -6  -2   22.30    6.80 
  -8  -6   2   18.70    3.80 
  -8  -6   2   20.50    4.50 
  -8   6   2   21.80    6.20 
   8   6  -2   20.90    4.70 
  -7  -6   2  532.75   18.60 
  -7  -6   2  526.15   15.70 
   7  -6  -2  529.05   26.70 
   7  -6  -2  467.45   25.50 
  -7  -6   2  506.25   17.90 
   7   6  -2  503.05   19.40 
  -7   6   2  493.85   24.90 
  -7   6   2  523.85   24.90 
  -7   6   2  533.15   27.30 
  -6  -6   2  895.51   23.50 
  -6  -6   2  922.01   23.10 
   6  -6  -2  859.31   34.80 
   6  -6  -2  860.51   33.30 
  -6  -6   2  900.21   20.20 
   6   6  -2  908.01   25.40 
  -6   6   2  912.51   41.60 
  -6   6   2  895.31   34.60 
  -5  -6   2 1444.46   27.20 
   5  -6  -2 1420.46   41.90 
  -5  -6   2 1434.86   28.70 
   5  -6  -2 1425.66   42.70 
  -5  -6   2 1417.06   29.60 
  -5   6   2 1357.96   42.20 
  -5   6   2 1407.46   40.30 
   5   6  -2 1438.76   31.90 
  -4  -6   2 1921.91   34.10 
   4  -6  -2 1893.81   48.20 
  -4  -6   2 1899.21   31.10 
   4  -6  -2 1891.71   47.60 
  -4   6   2 1823.02   45.50 
   4   6  -2 1884.91   36.50 
   4   6  -2 1853.11   31.50 
  -4   6   2 1833.02   48.00 
  -3  -6   2 2522.05   39.80 
   3  -6  -2 2510.85   54.99 
   3  -6  -2 2540.95   55.49 
  -3  -6   2 2492.75   41.30 
   3   6  -2 2461.35   43.30 
  -3   6   2 2528.85   55.59 
   3   6  -2 2473.45   39.00 
  -3   6   2 2462.45   53.09 
  -2  -6   2    0.20    0.90 
   2  -6  -2   -1.50    1.20 
   2  -6  -2   -0.10    1.50 
  -2  -6   2    3.10    1.20 
  -2   6   2    1.70    1.70 
   2   6  -2    2.70    1.10 
   2   6  -2    2.30    0.90 
  -2   6   2   -1.10    1.30 
  -1  -6   2 2671.23   44.70 
   1  -6  -2 2625.04   50.89 
   1  -6  -2 2568.84   51.49 
  -1  -6   2 2653.13   46.20 
   1   6  -2 2607.24   43.90 
  -1   6   2 2596.04   50.69 
   1   6  -2 2643.84   45.20 
  -1   6   2 2577.74   56.09 
   0  -6   2  709.83   19.90 
   0  -6  -2  701.83   18.50 
   0  -6  -2  706.23   20.30 
   0   6   2  690.13   19.60 
   0   6  -2  705.53   17.40 
   0   6  -2  689.43   19.00 
   0   6   2  712.23   18.40 
   1  -6   2   69.29    5.60 
  -1  -6  -2   68.69    5.40 
  -1  -6  -2   65.79    4.10 
   1  -6   2   69.39    6.40 
  -1   6  -2   67.29    5.30 
  -1   6  -2   72.49    6.20 
   1   6   2   70.09    5.30 
   1   6   2   62.49    3.70 
   2  -6   2  143.69   10.10 
  -2  -6  -2  136.99    7.70 
   2  -6   2  143.39    9.10 
   2   6   2  136.09    7.50 
  -2   6  -2  124.79    9.20 
  -2   6  -2  144.09    8.60 
  -2   6  -2  146.69   10.00 
   3  -6   2  471.55   20.60 
   3  -6   2  481.45   19.10 
  -3  -6  -2  482.25   15.80 
   3   6   2  489.15   15.80 
  -3   6  -2  497.85   20.70 
  -3   6  -2  495.75   18.10 
  -3   6  -2  452.15   19.70 
  -4  -6  -2   28.70    3.80 
   4  -6   2   24.70    5.40 
   4  -6   2   30.30    6.00 
  -4   6  -2   29.20    5.90 
   4   6   2   28.90    3.90 
  -4   6  -2   28.40    5.50 
  -4   6  -2   24.70    5.80 
  -5  -6  -2   19.20    4.10 
   5  -6   2   20.10    5.10 
  -5  -6  -2   20.50    3.00 
   5  -6   2   24.30    6.90 
  -5   6  -2   25.00    5.60 
  -5   6  -2   27.80    6.80 
   5   6   2   24.80    4.60 
  -5   6  -2   19.30    4.60 
  -6  -6  -2  147.49    8.00 
   6  -6   2  147.99   13.70 
  -6  -6  -2  157.98    9.80 
  -6  -6  -2  162.58    6.90 
  -6   6  -2  154.38   13.40 
   6   6   2  157.48   10.60 
  -6   6  -2  144.59   11.50 
  -6   6  -2  152.48   13.50 
   7  -6   2   30.90    7.90 
  -7  -6  -2   11.20    4.30 
  -7  -6  -2   18.70    3.30 
  -7  -6  -2   13.70    3.40 
  -7  -6  -2   16.20    4.20 
  -7   6  -2    7.60    3.80 
  -7   6  -2   10.50    5.00 
   7   6   2   18.30    4.40 
  -7   6  -2    7.60    4.60 
   8  -6   2  181.88   16.70 
  -8  -6  -2  198.18   12.50 
  -8  -6  -2  176.68   11.00 
  -8  -6  -2  206.08   10.00 
  -8  -6  -2  171.48   14.00 
  -8   6  -2  203.08   15.00 
  -8   6  -2  220.38   17.40 
   8   6   2  196.28   13.70 
  -9  -6  -2  388.46   19.20 
   9  -6   2  432.06   27.70 
  -9  -6  -2  345.37   14.60 
  -9  -6  -2  424.66   18.70 
  -9  -6  -2  414.36   22.80 
  -9   6  -2  413.56   25.40 
  -9   6  -2  411.56   23.30 
 -10  -6  -2    2.00    2.00 
  10  -6   2   -1.80    4.50 
 -10  -6  -2    0.80    3.80 
 -10  -6  -2    6.80    3.40 
 -10  -6  -2    2.10    1.60 
 -10   6  -2    2.80    3.30 
 -10   6  -2    1.10    3.20 
 -11  -6  -2  204.88   14.80 
 -11  -6  -2  207.28   14.90 
 -11  -6  -2  234.38   20.10 
  11  -6   2  246.88   25.40 
 -11   6  -2  229.48   20.20 
 -11   6  -2  220.78   26.20 
  12  -6   2   81.69   15.10 
 -12  -6  -2   72.69    7.90 
 -12  -6  -2   64.79    9.00 
 -12  -6  -2   51.49    9.80 
 -12   6  -2   60.69   11.90 
 -12   6  -2   70.89   13.20 
  13  -6   2   72.09   15.30 
 -13  -6  -2   82.09    8.90 
 -13  -6  -2   60.09   10.40 
 -13   6  -2   55.59   11.50 
 -13   6  -2   62.09   13.50 
  14  -6   2  220.38   24.70 
 -14  -6  -2  281.17   16.70 
 -14   6  -2  210.68   20.00 
 -14   6  -2  238.08   22.90 
 -15  -6  -2    2.00    4.00 
 -15  -6  -2    6.40    3.60 
 -15   6  -2  -10.20    5.70 
 -15  -7   2   10.00    5.60 
  15  -7  -2   12.90    9.10 
 -15  -7   2   16.00    5.10 
 -15   7   2   14.70   11.60 
 -15   7   2    5.70    5.50 
 -14  -7   2   17.80    6.00 
  14  -7  -2   17.30    7.50 
 -14  -7   2    8.30    4.90 
  13  -7  -2    1.70    6.00 
 -13  -7   2    7.40    4.90 
 -13  -7   2   16.00    6.40 
 -13  -7   2   30.30    5.70 
  13  -7  -2   15.20    8.30 
 -13   7   2   14.60    7.70 
 -13   7   2    5.80    5.00 
 -12  -7   2   15.50    5.90 
 -12  -7   2   20.20    5.90 
 -12  -7   2   31.00    5.60 
  12  -7  -2   49.30   13.40 
  12  -7  -2   15.70    7.30 
 -12  -7   2   22.70    6.90 
 -12   7   2   43.50   10.20 
  12   7  -2   28.10    7.30 
  11  -7  -2   49.60   11.70 
 -11  -7   2   40.80    7.40 
 -11  -7   2   42.50    6.60 
  11   7  -2   38.30    7.80 
 -11   7   2   36.00   12.50 
  10  -7  -2   67.59   13.40 
 -10  -7   2   58.09    6.80 
 -10  -7   2   33.70    6.40 
 -10  -7   2   41.90    5.10 
  10  -7  -2   52.79   11.50 
 -10  -7   2   44.90    6.20 
  10   7  -2   47.40    7.90 
 -10   7   2   42.70   10.30 
  -9  -7   2    7.90    3.30 
   9  -7  -2    6.50    5.90 
  -9  -7   2    5.00    2.30 
   9  -7  -2    1.80    2.80 
  -9  -7   2    3.50    3.00 
  -9   7   2    4.60    3.80 
   9   7  -2    3.50    2.90 
  -8  -7   2  108.79    8.30 
  -8  -7   2   93.89    6.80 
  -8  -7   2  112.89    8.30 
   8  -7  -2  120.09   13.40 
   8  -7  -2   96.19   12.60 
   8   7  -2  106.29    8.80 
  -8   7   2   92.19   11.40 
  -7  -7   2  146.79    9.50 
   7  -7  -2  161.78   14.70 
   7  -7  -2  140.89   14.20 
  -7  -7   2  139.69    8.60 
  -7  -7   2  150.08    7.50 
   7   7  -2  135.79    9.40 
  -7   7   2  145.79   13.50 
  -7   7   2  159.18   13.80 
   6  -7  -2   11.40    4.90 
  -6  -7   2   17.00    3.10 
  -6  -7   2   18.40    3.40 
  -6  -7   2   17.80    2.70 
   6  -7  -2   11.10    4.70 
  -6   7   2   10.40    4.10 
  -6   7   2   11.50    4.70 
  -6   7   2    7.40    4.30 
   6   7  -2   17.10    3.60 
   5  -7  -2  164.48   13.20 
   5  -7  -2  157.68   12.90 
  -5  -7   2  151.88    7.20 
  -5  -7   2  158.78    6.70 
  -5  -7   2  148.39    6.90 
  -5   7   2  162.88   12.50 
   5   7  -2  156.98    8.30 
   5   7  -2  150.38    6.50 
  -5   7   2  158.58   13.10 
  -4  -7   2    1.00    0.90 
   4  -7  -2   -0.60    1.70 
  -4  -7   2    1.30    1.10 
   4  -7  -2    1.20    1.60 
  -4   7   2   -2.60    1.70 
   4   7  -2   -0.30    1.10 
   4   7  -2   -1.00    0.70 
  -4   7   2   -1.00    2.00 
  -3  -7   2  206.98    7.20 
  -3  -7   2  215.78    7.20 
   3  -7  -2  210.88   13.30 
   3  -7  -2  236.98   14.20 
   3   7  -2  210.98    6.70 
  -3   7   2  214.08   12.60 
   3   7  -2  202.38    8.00 
  -3   7   2  224.88   13.80 
   2  -7  -2  251.57   13.40 
   2  -7  -2  256.87   13.70 
  -2  -7   2  258.07    8.50 
  -2  -7   2  252.27    9.10 
  -2   7   2  256.07   13.60 
   2   7  -2  257.67    8.40 
   2   7  -2  261.77    8.70 
  -2   7   2  252.47   13.10 
   1  -7  -2    1.30    1.50 
  -1  -7   2    3.90    1.60 
   1  -7  -2    2.10    2.10 
  -1  -7   2    2.40    1.20 
  -1   7   2    2.00    1.70 
  -1   7   2    3.50    1.90 
   1   7  -2    5.00    1.60 
   1   7  -2    0.60    0.90 
   0  -7   2  414.66   13.80 
   0  -7  -2  401.86   15.60 
   0  -7   2  386.86   14.90 
   0  -7  -2  411.06   13.90 
   0   7   2  413.06   13.90 
   0   7   2  414.46   15.10 
   0   7  -2  387.56   12.60 
   0   7  -2  407.46   14.50 
   1  -7   2  536.15   19.60 
  -1  -7  -2  547.45   17.70 
   1  -7   2  518.15   17.70 
  -1  -7  -2  538.95   14.70 
   1   7   2  545.25   17.20 
  -1   7  -2  515.15   18.60 
  -1   7  -2  551.14   16.90 
   1   7   2  529.35   13.70 
  -2  -7  -2  214.28   10.30 
   2  -7   2  201.68   11.40 
   2  -7   2  198.18   12.40 
   2   7   2  209.28    9.80 
  -2   7  -2  205.38   12.40 
  -2   7  -2  199.78   10.60 
  -2   7  -2  208.68   12.30 
   3  -7   2   39.30    5.20 
   3  -7   2   34.20    6.80 
  -3  -7  -2   39.40    4.50 
  -3   7  -2   30.50    5.90 
  -3   7  -2   35.70    6.70 
   3   7   2   33.00    4.10 
  -3   7  -2   31.20    5.30 
   4  -7   2  127.69   11.60 
   4  -7   2  137.49   11.00 
  -4  -7  -2  147.99    8.80 
  -4   7  -2  143.49   11.90 
  -4   7  -2  128.99   11.10 
   4   7   2  127.89    8.30 
  -4   7  -2  128.59    9.80 
  -5  -7  -2  133.09    8.50 
   5  -7   2  117.79   14.10 
  -5   7  -2  122.49   12.70 
  -5   7  -2  118.39   14.20 
  -5   7  -2  111.89   14.90 
   5   7   2  115.79    8.50 
  -6  -7  -2    0.70    1.10 
   6  -7   2    3.10    2.50 
  -6  -7  -2   -0.50    0.90 
  -6   7  -2    2.30    2.60 
   6   7   2   -2.20    1.60 
  -6   7  -2   -0.10    1.90 
  -6   7  -2   -1.40    2.00 
   7  -7   2   62.69   11.30 
  -7  -7  -2   46.90    4.00 
  -7  -7  -2   56.29    5.10 
  -7  -7  -2   49.80    8.20 
  -7  -7  -2   60.79    6.60 
  -7   7  -2   56.39    7.80 
   7   7   2   56.59    6.90 
  -8  -7  -2   41.90    7.00 
   8  -7   2   41.50   10.50 
  -8  -7  -2   38.40    4.20 
  -8  -7  -2   36.20    5.60 
  -8  -7  -2   31.60    6.70 
   8   7   2   32.10    6.30 
  -8   7  -2   34.50    7.80 
  -9  -7  -2   20.60    4.20 
  -9  -7  -2   24.90    4.10 
  -9  -7  -2   26.20    6.70 
  -9  -7  -2   25.50    6.10 
   9  -7   2   29.50    8.30 
  -9   7  -2   11.70    5.70 
  -9   7  -2    8.30    5.80 
   9   7   2   20.90    5.10 
 -10  -7  -2   15.10    3.10 
 -10  -7  -2   14.30    4.70 
 -10  -7  -2   14.10    4.00 
  10  -7   2    5.30    5.10 
 -10  -7  -2   15.50    4.10 
 -10   7  -2    6.10    4.90 
 -11  -7  -2   -0.60    2.10 
 -11  -7  -2   -3.70    3.10 
 -11  -7  -2    6.10    2.80 
 -11   7  -2   -3.80    2.60 
 -11   7  -2   -2.50    3.40 
  12  -7   2    2.20    5.60 
 -12  -7  -2    3.30    2.50 
 -12  -7  -2    7.90    3.90 
 -12  -7  -2   -1.80    3.20 
 -12   7  -2    6.70    4.70 
 -12   7  -2   14.00    6.40 
 -13  -7  -2    4.40    3.40 
 -13  -7  -2    1.40    7.40 
 -13  -7  -2    6.00    4.20 
  13  -7   2    3.90    6.40 
 -13   7  -2   13.10    6.90 
 -13   7  -2   13.40    7.90 
 -14  -7  -2   14.10    4.90 
  14  -7   2   13.50    8.50 
 -14  -7  -2   11.00    3.70 
 -14   7  -2    9.50    6.30 
 -14   7  -2   17.20    7.60 
 -15  -7  -2    1.10    3.70 
 -15  -7  -2   13.10    6.10 
 -15   7  -2    9.10    5.20 
 -15   7  -2   11.50    6.60 
  15  -8  -2    3.70    7.80 
 -15  -8   2   -4.60    3.50 
 -15   8   2    2.60    5.30 
 -15   8   2    5.50    5.60 
 -14  -8   2   33.50    6.30 
  14  -8  -2   19.60    8.50 
 -14  -8   2   20.10    6.20 
 -14   8   2   19.80    7.70 
 -14   8   2   13.10    7.90 
  13  -8  -2   82.69   16.30 
  13  -8  -2  149.59   19.20 
 -13  -8   2  111.29   11.20 
 -13  -8   2  131.79   10.20 
 -13  -8   2  114.79   11.80 
 -13  -8   2  127.79   11.50 
 -13   8   2  116.59   15.30 
 -12  -8   2  255.67   15.00 
 -12  -8   2  259.77   15.90 
 -12  -8   2  262.77   15.90 
  12  -8  -2  279.27   24.80 
  12  -8  -2  302.97   25.70 
 -12  -8   2  291.27   18.30 
 -12   8   2  257.37   22.30 
  12   8  -2  271.17   17.20 
  11  -8  -2   22.60    9.50 
  11  -8  -2   14.70    7.40 
 -11  -8   2   31.20    6.00 
 -11  -8   2   28.20    5.80 
 -11  -8   2   17.50    4.70 
 -11  -8   2   24.90    4.60 
 -11   8   2   25.40    8.40 
  11   8  -2   17.40    5.30 
  10  -8  -2  154.78   17.20 
 -10  -8   2  150.28   10.80 
 -10  -8   2  158.38   11.20 
 -10  -8   2  130.19    8.90 
 -10  -8   2  164.68   11.20 
  10  -8  -2  189.18   18.70 
 -10   8   2  163.88   16.70 
  10   8  -2  157.48   11.70 
   9  -8  -2  339.27   24.70 
  -9  -8   2  322.17   14.80 
  -9  -8   2  292.67   12.70 
   9  -8  -2  371.86   25.90 
  -9  -8   2  356.76   16.10 
  -9   8   2  341.57   22.90 
   9   8  -2  317.57   15.90 
  -8  -8   2  276.47   13.50 
   8  -8  -2  288.37   21.60 
  -8  -8   2  292.37   12.90 
  -8  -8   2  294.77   11.60 
   8  -8  -2  291.87   21.70 
   8   8  -2  271.87   13.90 
  -8   8   2  297.17   20.60 
  -7  -8   2 1562.84   33.60 
  -7  -8   2 1612.64   32.20 
   7  -8  -2 1624.34   52.99 
   7  -8  -2 1606.74   52.39 
  -7   8   2 1657.83   50.49 
   7   8  -2 1630.84   37.30 
   6  -8  -2  602.94   28.80 
  -6  -8   2  563.74   17.60 
  -6  -8   2  615.94   17.70 
  -6  -8   2  598.24   15.20 
   6  -8  -2  618.14   28.90 
  -6   8   2  632.14   27.90 
  -6   8   2  585.84   26.70 
   6   8  -2  594.34   16.20 
  -6   8   2  596.44   28.80 
   6   8  -2  599.74   18.50 
   5  -8  -2    7.80    4.70 
  -5  -8   2   11.20    2.00 
  -5  -8   2    9.30    2.10 
   5   8  -2   12.80    2.30 
   5   8  -2   10.60    2.50 
  -5   8   2    3.90    2.70 
  -5   8   2    7.50    3.00 
  -4  -8   2 1897.81   32.90 
  -4  -8   2 1887.91   36.20 
   4  -8  -2 1909.21   50.89 
   4  -8  -2 1951.40   50.99 
  -4   8   2 1874.91   48.40 
   4   8  -2 1858.21   33.00 
  -4   8   2 1890.71   50.89 
   4   8  -2 1902.91   35.90 
   3  -8  -2  608.24   24.20 
  -3  -8   2  600.84   14.20 
  -3  -8   2  614.44   15.50 
   3  -8  -2  611.24   24.60 
  -3   8   2  598.44   23.20 
  -3   8   2  588.64   23.90 
   3   8  -2  596.44   15.20 
   3   8  -2  604.94   14.30 
   2  -8  -2  471.75   20.00 
  -2  -8   2  463.45   12.90 
  -2  -8   2  464.25   14.30 
   2  -8  -2  458.95   19.20 
   2   8  -2  464.85   13.20 
   2   8  -2  461.15   12.60 
  -2   8   2  471.15   19.50 
  -2   8   2  446.96   18.60 
  -1  -8   2  410.86   13.70 
   1  -8  -2  428.96   17.80 
  -1  -8   2  425.26   15.00 
   1  -8  -2  415.76   16.60 
   1   8  -2  418.76   12.50 
  -1   8   2  419.46   16.70 
  -1   8   2  423.56   17.00 
   0  -8  -2    4.00    2.20 
   0  -8   2    6.90    2.80 
   0  -8   2    2.70    1.80 
   0  -8  -2    5.20    2.00 
   0   8  -2    8.30    2.60 
   0   8  -2    3.20    2.00 
   0   8   2    6.60    2.00 
   0   8   2    5.30    2.20 
  -1  -8  -2  440.76   13.20 
  -1  -8  -2  444.16   16.60 
   1  -8   2  430.66   16.50 
   1  -8   2  446.26   18.50 
  -1   8  -2  449.36   17.60 
  -1   8  -2  468.15   18.40 
  -1   8  -2  448.76   15.60 
   1   8   2  440.96   16.00 
   1   8   2  453.15   13.10 
   1   8   2  445.66   12.70 
   2  -8   2  897.61   29.70 
  -2  -8  -2  883.71   24.40 
   2  -8   2  881.61   27.10 
  -2   8  -2  868.31   28.20 
  -2   8  -2  890.81   25.50 
  -2   8  -2  915.71   29.20 
   2   8   2  896.71   24.10 
  -3  -8  -2  136.29    8.50 
   3  -8   2  130.99   10.20 
   3  -8   2  132.49   11.20 
  -3   8  -2  122.09   10.70 
  -3   8  -2  123.89    9.20 
  -3   8  -2  125.59   10.60 
   3   8   2  123.89    8.00 
  -4  -8  -2   10.10    2.90 
   4  -8   2   14.50    4.80 
   4  -8   2    8.90    4.10 
  -4   8  -2    4.80    2.50 
  -4   8  -2   10.50    3.80 
  -4   8  -2   11.70    4.40 
   4   8   2    9.50    2.80 
  -5  -8  -2  319.87   14.10 
   5  -8   2  342.17   20.90 
  -5   8  -2  328.07   19.40 
   5   8   2  307.27   14.20 
  -5   8  -2  356.06   20.60 
  -5   8  -2  319.47   17.20 
   6  -8   2  299.37   20.50 
  -6  -8  -2  323.97   14.50 
  -6   8  -2  287.27   20.00 
  -6   8  -2  304.17   17.70 
   6   8   2  291.57   14.60 
  -6   8  -2  283.57   19.20 
   7  -8   2   73.69   13.40 
  -7  -8  -2   79.79    7.40 
  -7  -8  -2   73.79    4.80 
  -7  -8  -2   74.79    4.00 
  -7   8  -2   62.29    8.60 
   7   8   2   70.49    7.70 
   8  -8   2 1421.16   52.69 
  -8  -8  -2 1406.76   28.10 
  -8  -8  -2 1380.16   37.70 
  -8  -8  -2 1434.46   43.60 
  -8   8  -2 1488.65   46.40 
   8   8   2 1382.46   39.80 
   9  -8   2  535.25   32.50 
  -9  -8  -2  561.44   19.00 
  -9  -8  -2  465.75   15.10 
  -9  -8  -2  559.14   22.90 
  -9  -8  -2  544.45   26.40 
  -9   8  -2  552.54   31.00 
  -9   8  -2  567.44   28.30 
   9   8   2  540.05   24.30 
 -10  -8  -2   29.90    4.90 
  10  -8   2   16.70    8.30 
 -10  -8  -2   32.20    7.60 
 -10  -8  -2   17.60    3.60 
 -10  -8  -2   34.10    6.70 
 -10   8  -2   22.70    8.10 
 -10   8  -2   24.00    8.40 
 -11  -8  -2  452.25   19.50 
 -11  -8  -2  448.06   16.60 
 -11  -8  -2  473.05   22.60 
  11  -8   2  378.06   30.10 
 -11   8  -2  415.76   29.10 
 -11   8  -2  430.76   26.40 
  12  -8   2  240.58   23.90 
 -12  -8  -2  245.18   16.70 
 -12  -8  -2  260.47   13.00 
 -12  -8  -2  257.57   15.30 
 -12   8  -2  291.67   22.30 
 -12   8  -2  279.47   24.20 
  13  -8   2  -11.00    5.50 
 -13  -8  -2    7.90    4.20 
 -13  -8  -2    4.00    3.10 
 -13   8  -2    8.20    6.40 
 -13   8  -2   13.00    5.60 
  14  -8   2   93.19   19.30 
 -14  -8  -2  109.59   12.40 
 -14  -8  -2  120.49    9.70 
 -14   8  -2  115.49   19.30 
 -14   8  -2  111.39   15.30 
  15  -9  -2  116.29   27.50 
 -15   9   2  114.69   21.20 
 -15   9   2  137.89   18.50 
  14  -9  -2  152.78   21.40 
 -14  -9   2  170.88   12.40 
 -14  -9   2  175.28   12.00 
 -14   9   2  179.68   20.10 
 -14   9   2  179.88   20.30 
 -13  -9   2    3.80    3.40 
  13  -9  -2   13.70    8.70 
  13  -9  -2    6.40    5.10 
 -13  -9   2   19.00    5.00 
 -13   9   2   12.30    6.60 
 -12  -9   2  253.27   13.30 
  12  -9  -2  251.77   24.00 
 -12  -9   2  271.07   17.90 
 -12  -9   2  204.58   14.30 
  12  -9  -2  194.38   21.30 
 -12  -9   2  208.98   13.90 
 -12   9   2  243.68   21.90 
 -11  -9   2  263.87   15.10 
  11  -9  -2  251.57   23.80 
 -11  -9   2  306.87   15.00 
  11  -9  -2  263.77   23.70 
 -11  -9   2  288.47   15.00 
 -11  -9   2  293.47   13.80 
  11   9  -2  287.47   15.80 
 -11   9   2  272.87   22.50 
  10  -9  -2   -7.20    4.40 
 -10  -9   2    9.10    2.90 
 -10  -9   2    6.00    2.60 
 -10  -9   2   10.60    2.80 
  10  -9  -2    2.20    4.80 
 -10  -9   2   10.80    3.90 
  10   9  -2    5.40    3.80 
 -10   9   2   10.20    5.20 
  -9  -9   2  241.78   13.00 
   9  -9  -2  197.18   19.70 
   9  -9  -2  235.18   20.60 
  -9  -9   2  250.57   11.90 
  -9  -9   2  207.58   10.20 
  -9  -9   2  224.88   12.20 
  -9   9   2  229.08   19.00 
   9   9  -2  255.27   13.30 
  -8  -9   2  482.55   17.60 
   8  -9  -2  465.65   28.20 
  -8  -9   2  486.05   15.60 
   8  -9  -2  468.05   28.50 
  -8  -9   2  438.16   14.60 
   8   9  -2  448.86   17.30 
  -8   9   2  473.55   26.50 
   7  -9  -2   86.19   11.30 
  -7  -9   2   89.29    7.20 
   7  -9  -2   85.69   13.90 
  -7  -9   2   73.09    5.20 
  -7   9   2   79.79   10.20 
   7   9  -2   91.09    6.90 
  -6  -9   2  445.66   14.60 
  -6  -9   2  437.56   12.70 
  -6  -9   2  426.46   12.00 
   6  -9  -2  412.86   24.10 
   6  -9  -2  430.46   24.60 
  -6   9   2  424.06   22.80 
  -6   9   2  420.86   25.30 
  -6   9   2  447.06   24.50 
   6   9  -2  436.66   14.60 
   6   9  -2  415.06   13.00 
  -5  -9   2  211.38    8.10 
   5  -9  -2  226.18   16.40 
   5  -9  -2  210.48   16.10 
  -5  -9   2  205.38    7.20 
   5   9  -2  198.78    7.90 
  -5   9   2  201.58   14.70 
  -5   9   2  194.88   15.40 
   5   9  -2  188.78    8.60 
  -5   9   2  228.18   15.60 
   4  -9  -2  159.28   13.10 
  -4  -9   2  164.38    6.30 
   4  -9  -2  166.78   15.70 
  -4  -9   2  155.68    7.20 
   4   9  -2  158.38    6.70 
  -4   9   2  146.39   11.80 
   4   9  -2  154.88    7.30 
  -4   9   2  150.88   12.80 
   3  -9  -2  204.98   14.30 
   3  -9  -2  226.58   14.70 
  -3  -9   2  218.08    9.30 
  -3  -9   2  212.18    7.90 
  -3   9   2  251.57   15.50 
   3   9  -2  229.08    8.50 
   3   9  -2  215.98    8.40 
  -3   9   2  215.98   13.90 
  -3   9   2  213.58   13.50 
  -2  -9   2  434.46   14.80 
   2  -9  -2  422.16   18.90 
  -2  -9   2  427.36   13.10 
   2  -9  -2  449.26   20.30 
  -2   9   2  418.46   17.80 
  -2   9   2  420.76   18.70 
  -2   9   2  437.46   19.40 
   2   9  -2  362.76   18.50 
   2   9  -2  423.56   12.30 
  -1  -9   2  958.00   25.80 
  -1  -9   2  942.11   23.20 
   1  -9  -2  958.00   27.80 
   1  -9  -2  932.91   29.40 
  -1   9   2  918.61   27.80 
   1   9  -2  937.01   24.20 
  -1   9   2  944.71   27.80 
  -1   9   2  904.21   25.90 
   1   9  -2  937.61   21.70 
   0  -9   2   47.10    5.10 
   0  -9  -2   43.20    4.80 
   0  -9  -2   45.40    5.80 
   0  -9   2   44.50    5.60 
   0   9   2   45.60    5.00 
   0   9  -2   39.50    4.30 
   0   9  -2   47.40    5.20 
   0   9   2   35.60    4.10 
   0   9   2   39.10    4.50 
  -1  -9  -2  612.84   16.80 
   1  -9   2  592.14   22.70 
  -1  -9  -2  589.04   20.60 
   1  -9   2  599.14   20.80 
   1   9   2  590.44   15.50 
  -1   9  -2  604.04   21.70 
  -1   9  -2  600.24   22.10 
   1   9   2  605.84   16.80 
  -1   9  -2  614.14   19.40 
   1   9   2  619.54   20.20 
   2  -9   2    0.50    1.50 
   2  -9   2    2.80    2.40 
  -2  -9  -2    1.80    1.80 
  -2   9  -2    2.10    1.80 
   2   9   2    0.90    1.60 
  -2   9  -2    1.90    1.90 
  -2   9  -2    7.60    2.90 
   3  -9   2  297.07   17.90 
   3  -9   2  283.97   16.00 
  -3  -9  -2  302.37   13.50 
  -3   9  -2  307.07   17.60 
  -3   9  -2  307.47   15.30 
  -3   9  -2  293.27   16.80 
   3   9   2  306.07   13.30 
   4  -9   2  552.44   40.80 
   4  -9   2  594.44   33.70 
  -4  -9  -2  587.04   19.80 
  -4   9  -2  614.74   28.20 
   4   9   2  613.64   20.10 
  -4   9  -2  552.04   31.20 
  -4   9  -2  581.54   29.80 
   5  -9   2   69.89    9.40 
  -5  -9  -2   72.19    6.60 
  -5   9  -2   76.69    8.30 
  -5   9  -2   79.39    9.60 
  -5   9  -2   72.69    9.10 
   5   9   2   72.39    6.60 
   6  -9   2  344.47   22.70 
  -6  -9  -2  352.56   15.70 
   6   9   2  342.17   16.10 
  -6   9  -2  328.27   18.90 
   7  -9   2  134.59   15.10 
  -7  -9  -2  137.89    9.90 
  -7   9  -2  118.49   12.10 
   7   9   2  124.19   10.10 
  -8  -9  -2   82.79    8.00 
  -8  -9  -2   76.39    9.10 
   8  -9   2   83.79   15.20 
   8   9   2   65.79    8.10 
  -8   9  -2   72.59   10.30 
   9  -9   2    3.30    4.10 
  -9  -9  -2    8.80    4.70 
  -9  -9  -2    0.40    2.20 
  -9  -9  -2    6.00    1.90 
   9   9   2    6.20    3.60 
  -9   9  -2    6.50    3.80 
  10  -9   2   33.70   14.70 
 -10  -9  -2   19.80    3.80 
 -10  -9  -2   20.80    3.50 
 -10  -9  -2   15.90    4.40 
 -10  -9  -2   12.50    4.90 
 -10   9  -2    4.70    7.30 
 -10   9  -2   20.70    7.90 
  11  -9   2   62.99   14.70 
 -11  -9  -2   52.49    8.50 
 -11  -9  -2   41.40    5.90 
 -11  -9  -2   47.20    4.80 
 -11   9  -2   47.40   11.10 
 -11   9  -2   36.90   11.50 
 -12  -9  -2   99.99   10.70 
 -12  -9  -2  115.89    7.60 
  12  -9   2  114.99   20.30 
 -12  -9  -2  111.89    9.00 
 -12   9  -2   96.89   16.90 
 -12   9  -2  102.79   13.60 
 -13  -9  -2  116.09    8.30 
  13  -9   2  107.09   19.60 
 -13  -9  -2  147.19   13.40 
 -13   9  -2  110.79   15.20 
 -13   9  -2  124.49   17.00 
  14  -9   2   20.80    9.10 
 -14  -9  -2    4.90    3.80 
 -14  -9  -2    8.40    4.80 
 -14   9  -2   10.20    8.10 
  14 -10  -2   -2.40    6.90 
 -14 -10   2    4.00    3.40 
 -14  10   2   -4.90    5.80 
 -14  10   2    8.60    5.70 
 -13 -10   2   67.49    8.10 
  13 -10  -2   45.40   12.00 
  13 -10  -2   52.39   13.10 
 -13  10   2   57.19   12.70 
 -12 -10   2    8.10    3.90 
 -12 -10   2   10.30    3.30 
 -12 -10   2   10.50    3.10 
  12 -10  -2    7.40    6.70 
  12 -10  -2    5.20    4.90 
 -12 -10   2    1.60    2.70 
 -12  10   2    9.70    5.20 
 -11 -10   2    4.90    2.70 
 -11 -10   2    1.00    2.90 
  11 -10  -2    2.80    4.70 
  11 -10  -2    2.50    5.70 
 -11 -10   2   13.90    3.40 
 -11 -10   2   12.70    3.60 
 -11  10   2    8.50    5.80 
 -10 -10   2    2.70    2.50 
 -10 -10   2    4.80    2.30 
  10 -10  -2    4.80    4.70 
 -10 -10   2    9.60    3.50 
  10 -10  -2    6.70    6.40 
 -10 -10   2    6.20    2.60 
 -10  10   2    6.80    4.00 
  10  10  -2    1.50    2.80 
  -9 -10   2    6.50    2.40 
   9 -10  -2    9.80    5.40 
   9 -10  -2   16.10    6.80 
  -9 -10   2   16.50    3.00 
  -9 -10   2    5.60    2.30 
  -9 -10   2    8.10    3.30 
   9  10  -2    8.50    2.80 
  -9  10   2    3.20    4.40 
   8 -10  -2   27.20    8.90 
  -8 -10   2   25.70    3.90 
  -8 -10   2   24.80    3.50 
  -8 -10   2   24.30    4.40 
   8 -10  -2   23.90    7.60 
   8  10  -2   26.30    4.30 
  -8  10   2   22.90    6.90 
  -7 -10   2  189.28    8.40 
  -7 -10   2  184.08    7.40 
   7 -10  -2  165.48   16.50 
   7 -10  -2  180.98   16.50 
  -7  10   2  203.78   16.50 
   7  10  -2  179.68    9.00 
   6 -10  -2  169.08   15.50 
   6 -10  -2  161.08   15.40 
  -6 -10   2  167.68    7.70 
  -6 -10   2  166.18    6.40 
   6  10  -2  154.88    7.60 
  -6  10   2  154.68   13.90 
   6  10  -2  163.38    8.00 
  -5 -10   2   76.69    4.20 
  -5 -10   2   79.19    5.30 
   5 -10  -2   77.89    9.70 
   5 -10  -2   87.19   10.70 
   5  10  -2   73.99    4.90 
  -5  10   2   76.39    9.10 
  -5  10   2   72.09    8.70 
   5  10  -2   77.29    5.20 
  -5  10   2   75.49    9.90 
  -4 -10   2  374.26   10.70 
  -4 -10   2  393.36   12.90 
   4 -10  -2  374.26   24.90 
   4 -10  -2  388.06   21.80 
   4  10  -2  390.66   12.20 
  -4  10   2  392.36   20.40 
  -4  10   2  381.96   20.30 
   4  10  -2  397.56   12.10 
  -3 -10   2   33.70    4.10 
  -3 -10   2   35.50    3.40 
   3 -10  -2   40.30    7.70 
   3 -10  -2   48.70    8.70 
   3  10  -2   27.60    3.40 
  -3  10   2   39.70    7.40 
  -3  10   2   25.50    8.10 
  -3  10   2   48.20    6.50 
   2 -10  -2    5.70    2.80 
  -2 -10   2    9.10    2.40 
   2 -10  -2    2.30    2.80 
  -2 -10   2    6.70    2.60 
  -2  10   2    1.20    2.20 
  -2  10   2    3.00    2.30 
  -2  10   2    5.50    2.60 
   2  10  -2    7.10    2.20 
   2  10  -2    9.20    2.30 
  -1 -10   2   37.50    4.40 
   1 -10  -2   38.20    5.20 
   1 -10  -2   35.00    6.70 
  -1 -10   2   38.50    5.10 
  -1  10   2   39.60    6.60 
   1  10  -2   39.60    4.70 
   1  10  -2   28.00    3.50 
  -1  10   2   42.80    5.80 
  -1  10   2   34.60    4.70 
   0 -10  -2   79.59    6.80 
   0 -10  -2   69.09    7.40 
   0 -10   2   70.09    7.10 
   0 -10   2   71.59    6.50 
   0  10   2   59.69    6.50 
   0  10   2   71.29    6.40 
   0  10  -2   63.79    5.50 
   0  10   2   69.59    5.70 
   0  10  -2   72.79    7.10 
   0  10  -2   69.89    6.50 
   1 -10   2  243.68   14.60 
   1 -10   2  220.68   12.60 
  -1 -10  -2  225.28   13.00 
  -1 -10  -2  232.58   10.10 
  -1  10  -2  227.18   13.10 
  -1  10  -2  244.08   12.00 
   1  10   2  243.38   12.50 
   1  10   2  249.08   10.50 
  -1  10  -2  247.88   14.10 
   1  10   2  216.48    9.00 
   2 -10   2   34.00    6.50 
   2 -10   2   30.50    6.80 
  -2 -10  -2   35.40    5.80 
  -2  10  -2   28.40    5.90 
   2  10   2   28.00    2.40 
  -2  10  -2   21.30    5.30 
  -2  10  -2   28.70    5.30 
   2  10   2   29.50    5.10 
   3 -10   2   52.69    9.30 
   3 -10   2   40.80    7.40 
  -3 -10  -2   53.39    6.00 
  -3  10  -2   39.40    6.70 
   3  10   2   56.29    5.60 
  -3  10  -2   56.69    9.60 
  -3  10  -2   57.99    7.60 
  -4 -10  -2   84.89    7.40 
   4 -10   2   87.69    9.60 
   4 -10   2   64.59    9.20 
  -4  10  -2   70.59    8.00 
  -4  10  -2   99.29   10.50 
  -4  10  -2   66.19    8.70 
   4  10   2   74.19    6.80 
   5 -10   2   29.20    8.30 
  -5 -10  -2   22.70    4.60 
  -5  10  -2   26.30    6.10 
   5  10   2   29.10    5.50 
  -5  10  -2   24.20    7.10 
  -5  10  -2   14.50    5.20 
  -6 -10  -2   39.20    5.10 
   6 -10   2   55.89   10.60 
  -6  10  -2   41.40    8.40 
   6  10   2   44.10    6.10 
  -7 -10  -2   42.50    5.80 
   7 -10   2   26.00    8.00 
  -7  10  -2   30.70    7.80 
   7  10   2   27.80    5.50 
   8 -10   2   22.50    8.80 
  -8 -10  -2   23.90    6.50 
  -8 -10  -2   10.60    3.90 
  -8  10  -2   15.90    6.50 
   8  10   2   18.10    5.50 
  -9 -10  -2  370.56   18.30 
  -9 -10  -2  373.76   21.40 
   9 -10   2  360.36   27.20 
   9  10   2  382.56   19.80 
  -9  10  -2  398.66   24.20 
 -10 -10  -2  123.39   10.40 
  10 -10   2  114.59   16.30 
 -10 -10  -2   99.79   11.70 
  10  10   2  135.89   12.20 
 -10  10  -2  114.99   15.00 
 -10  10  -2  124.79   13.90 
  11 -10   2   57.79   14.90 
 -11 -10  -2   79.39    9.00 
 -11  10  -2   75.09   14.50 
 -11  10  -2   74.69   14.50 
 -12 -10  -2  107.89    6.50 
 -12 -10  -2  128.49   11.90 
 -12 -10  -2  121.39    8.30 
  12 -10   2   93.59   18.40 
 -12  10  -2   97.09   17.10 
 -12  10  -2   92.99   15.60 
  13 -10   2   14.50    8.20 
 -13 -10  -2    8.50    5.20 
 -13 -10  -2   18.10    3.30 
 -13  10  -2   22.70    8.00 
 -13  10  -2   12.20    6.80 
 -14 -10  -2   51.09    9.50 
  14 -10   2   51.59   14.20 
 -14  10  -2   69.89   14.20 
 -14  10  -2   70.39   13.80 
 -14  11   2  136.59   17.80 
  13 -11  -2    3.70    7.60 
 -13 -11   2    0.70    2.40 
 -13 -11   2    7.70    3.00 
 -13  11   2    0.20    4.70 
 -12 -11   2  184.18   10.30 
 -12 -11   2  188.08   10.40 
 -12 -11   2  157.78   11.70 
  12 -11  -2  194.98   21.90 
 -12 -11   2  185.58   10.60 
  12 -11  -2  176.78   19.70 
 -12  11   2  167.18   18.40 
  11 -11  -2  221.18   22.30 
 -11 -11   2  238.58   11.40 
 -11 -11   2  242.08   11.60 
 -11 -11   2  230.68   10.70 
 -11 -11   2  266.47   14.10 
  11 -11  -2  242.48   23.10 
 -11  11   2  199.18   19.60 
 -10 -11   2   81.39    5.80 
 -10 -11   2   59.29    6.90 
 -10 -11   2   69.29    6.00 
  10 -11  -2   60.29   12.40 
 -10 -11   2   72.29    6.00 
  10 -11  -2   90.69   17.20 
 -10  11   2   56.19   11.50 
   9 -11  -2  359.56   26.30 
  -9 -11   2  383.26   15.00 
  -9 -11   2  332.77   12.90 
   9 -11  -2  370.86   27.70 
  -9 -11   2  400.36   16.10 
  -9 -11   2  316.17   12.50 
  -9  11   2  358.86   24.70 
   9  11  -2  364.56   13.70 
   8 -11  -2   89.69   16.60 
   8 -11  -2   58.69   12.50 
  -8 -11   2   85.49    7.00 
  -8 -11   2   67.39    5.30 
  -8  11   2   66.09   12.40 
   7 -11  -2   45.70   11.10 
   7 -11  -2   22.20    6.90 
  -7 -11   2   33.20    3.80 
  -7  11   2   34.20    8.40 
   6 -11  -2  583.74   30.00 
   6 -11  -2  586.34   30.90 
  -6 -11   2  590.04   13.30 
  -6 -11   2  572.04   16.30 
  -6  11   2  612.34   28.30 
   6  11  -2  556.94   20.30 
  -5 -11   2  202.78    7.10 
  -5 -11   2  195.68    9.00 
   5 -11  -2  208.48   16.30 
   5 -11  -2  203.18   17.00 
  -5  11   2  192.88   14.90 
  -5  11   2  207.28   16.70 
   5  11  -2  203.18    8.90 
   5  11  -2  216.88   13.00 
   4 -11  -2   70.89   12.00 
  -4 -11   2   66.09    4.40 
  -4 -11   2   74.79    5.80 
   4 -11  -2   79.29    9.50 
  -4  11   2   63.49    8.30 
  -4  11   2   75.19    9.60 
   4  11  -2   74.19    5.00 
   4  11  -2   76.59    5.70 
  -4  11   2   68.49    8.60 
   3 -11  -2 1424.56   44.90 
  -3 -11   2 1528.55   34.10 
  -3 -11   2 1450.65   30.30 
   3 -11  -2 1524.95   44.20 
  -3  11   2 1503.55   44.60 
  -3  11   2 1447.36   40.60 
   3  11  -2 1443.36   31.30 
   3  11  -2 1481.45   29.60 
  -3  11   2 1478.45   43.10 
  -2 -11   2 1252.57   28.30 
  -2 -11   2 1233.78   31.60 
   2 -11  -2 1203.88   36.40 
   2 -11  -2 1242.48   39.30 
  -2  11   2 1200.18   36.90 
   2  11  -2 1215.08   29.00 
   2  11  -2 1233.88   26.10 
  -2  11   2 1194.38   34.00 
  -2  11   2 1144.89   45.70 
  -1 -11   2    6.10    2.30 
   1 -11  -2    7.10    2.50 
   1 -11  -2    6.90    3.30 
  -1 -11   2    4.80    2.70 
  -1  11   2    7.10    3.20 
   1  11  -2    4.50    2.30 
   1  11  -2    3.50    2.00 
  -1  11   2    5.30    2.60 
   1  11  -2    5.90    2.10 
  -1  11   2    4.70    2.30 
   0 -11  -2 1101.69   33.90 
   0 -11   2 1112.79   33.10 
   0 -11  -2 1123.09   29.80 
   0 -11   2 1093.69   30.10 
   0  11   2 1121.99   27.90 
   0  11   2 1129.29   30.30 
   0  11   2 1069.29   31.60 
   0  11  -2 1121.79   27.70 
   0  11  -2 1100.59   32.00 
   0  11  -2 1115.39   31.30 
   1 -11   2 1422.16   41.00 
   1 -11   2 1502.85   38.70 
  -1 -11  -2 1491.65   39.30 
   1  11   2 1532.75   37.70 
  -1  11  -2 1438.66   35.10 
  -1  11  -2 1397.46   38.70 
   1  11   2 1436.16   30.20 
  -1  11  -2 1432.16   40.10 
   2 -11   2  192.78   14.20 
  -2 -11  -2  167.08   11.10 
   2 -11   2  169.78   12.20 
   2  11   2  172.48   10.60 
   2  11   2  164.08    7.00 
  -2  11  -2  160.98   12.60 
  -2  11  -2  162.38   12.40 
  -2  11  -2  183.38   11.30 
   3 -11   2  608.84   29.20 
   3 -11   2  588.24   30.40 
  -3 -11  -2  636.04   22.40 
  -3  11  -2  623.04   26.40 
  -3  11  -2  624.84   34.90 
   3  11   2  612.04   21.20 
  -3  11  -2  564.84   28.30 
  -4 -11  -2 1024.20   29.40 
   4 -11   2 1036.30   39.10 
  -4  11  -2 1023.20   33.20 
   4  11   2  975.40   28.40 
  -4  11  -2  980.50   36.10 
  -4  11  -2  981.30   37.40 
   5 -11   2   15.20    5.80 
  -5 -11  -2   12.20    3.60 
   5  11   2   10.10    3.40 
  -5  11  -2    7.30    3.30 
  -6 -11  -2 1028.00   29.90 
   6 -11   2  966.90   41.60 
  -6  11  -2  970.10   35.40 
   6  11   2  971.90   29.70 
   7 -11   2  393.26   27.10 
  -7 -11  -2  402.46   18.00 
   7  11   2  410.66   18.80 
  -7  11  -2  439.16   23.80 
   8 -11   2   88.29   15.40 
  -8 -11  -2   91.29   11.30 
  -8  11  -2   84.29   13.30 
  -9 -11  -2  398.86   18.90 
  -9 -11  -2  400.26   21.90 
   9  11   2  365.06   19.40 
 -10 -11  -2  214.08   16.50 
  10 -11   2  214.38   22.00 
 -10 -11  -2  200.38   13.60 
  10  11   2  198.58   15.00 
 -10  11  -2  202.88   18.10 
  11 -11   2   69.19   13.90 
 -11 -11  -2   77.89    8.70 
 -11  11  -2   66.79   13.70 
 -11  11  -2   72.59   13.50 
 -12 -11  -2   37.80    7.20 
  12 -11   2   25.00    8.90 
 -12  11  -2   40.10   11.30 
 -12  11  -2   30.60    9.70 
  13 -11   2  397.36   33.60 
 -13 -11  -2  440.36   22.90 
 -13  11  -2  456.15   30.50 
 -13  11  -2  458.95   33.60 
 -14 -11  -2  149.69   14.20 
  14 -11   2  160.88   21.00 
 -14  11  -2  185.48   20.10 
 -14  11  -2  180.18   21.50 
  14 -12  -2    2.20    8.80 
 -14  12   2    5.30    5.80 
  13 -12  -2   43.40   10.80 
 -13 -12   2   60.49    6.70 
 -13  12   2   51.79   12.80 
  12 -12  -2   14.80    7.10 
 -12 -12   2   -0.60    2.50 
 -12  12   2   -6.50    4.00 
  11 -12  -2  141.69   18.40 
 -11 -12   2  168.78   11.00 
  11 -12  -2  131.89   18.00 
 -11 -12   2  184.58    9.70 
 -11 -12   2  165.18    8.10 
 -11  12   2  150.48   17.50 
 -10 -12   2  106.59    7.20 
  10 -12  -2  101.29   14.50 
 -10 -12   2  108.49    8.20 
  10 -12  -2   78.49   16.50 
 -10  12   2   96.79   12.70 
  -9 -12   2    8.40    4.10 
   9 -12  -2    3.10    4.10 
  -9  12   2    1.40    2.80 
   8 -12  -2   86.29   12.20 
  -8 -12   2   73.29    6.40 
   8 -12  -2   54.99   12.00 
  -8 -12   2   55.79    5.00 
  -8  12   2   46.20   10.40 
  -7 -12   2    9.50    3.60 
   7 -12  -2   15.90    7.00 
  -7 -12   2   15.60    3.00 
   7 -12  -2   15.30    6.00 
   7  12  -2   17.50    3.30 
  -7  12   2    7.30    4.30 
   6 -12  -2   38.50    9.60 
   6 -12  -2   19.00    6.70 
  -6 -12   2   28.90    4.40 
  -6  12   2   19.10    6.00 
   6  12  -2   33.70    4.10 
  -5 -12   2   13.40    3.10 
   5 -12  -2   11.20    5.20 
  -5 -12   2   12.00    2.00 
   5 -12  -2   13.30    4.70 
   5  12  -2    9.00    2.40 
  -5  12   2    3.20    3.20 
   4 -12  -2   33.80    8.00 
   4 -12  -2   38.00    8.40 
  -4 -12   2   35.90    3.50 
  -4 -12   2   35.90    4.70 
   4  12  -2   32.60    3.90 
  -4  12   2   41.10    7.60 
  -4  12   2   39.90    8.20 
   4  12  -2   36.90    3.60 
  -3 -12   2  194.58   10.90 
  -3 -12   2  175.18   10.30 
   3 -12  -2  187.28   14.30 
   3 -12  -2  181.58   15.10 
   3  12  -2  166.48    7.80 
  -3  12   2  154.88   12.80 
  -3  12   2  161.88   12.30 
   3  12  -2  169.38    9.10 
   2 -12  -2   46.00    8.50 
  -2 -12   2   43.80    4.80 
  -2 -12   2   43.30    5.80 
   2 -12  -2   48.40    8.40 
  -2  12   2   50.99    7.20 
   2  12  -2   53.89    5.60 
  -2  12   2   45.50    6.10 
   2  12  -2   50.99    4.50 
   2  12  -2   47.80    5.50 
  -2  12   2   53.39    6.80 
  -1 -12   2  482.15   17.70 
  -1 -12   2  478.15   20.00 
   1 -12  -2  468.65   24.90 
   1 -12  -2  456.75   19.90 
  -1  12   2  498.05   21.10 
  -1  12   2  474.15   18.70 
   1  12  -2  462.15   18.00 
   1  12  -2  476.75   15.50 
   1  12  -2  481.15   18.90 
   0 -12   2  934.41   28.30 
   0 -12   2  920.21   31.00 
   0 -12  -2  983.10   28.00 
   0 -12  -2  940.51   32.10 
   0  12   2  979.40   28.50 
   0  12  -2  934.11   29.20 
   0  12  -2  969.00   30.50 
   0  12  -2  938.11   25.50 
   0  12   2  927.31   29.90 
   0  12   2  954.10   25.70 
   1 -12   2    1.10    2.10 
   1 -12   2    1.60    2.60 
  -1 -12  -2    4.90    2.90 
  -1  12  -2    0.10    1.90 
   1  12   2    0.10    1.80 
  -1  12  -2    0.90    1.70 
   1  12   2    0.40    1.30 
  -1  12  -2    1.00    2.00 
   1  12   2   -1.20    1.90 
  -2 -12  -2  345.27   17.20 
   2 -12   2  338.67   18.40 
   2 -12   2  336.37   20.90 
   2  12   2  339.37   10.00 
  -2  12  -2  387.76   20.70 
  -2  12  -2  363.36   16.90 
   2  12   2  359.36   11.60 
   2  12   2  332.87   15.90 
  -3 -12  -2  435.56   18.90 
   3 -12   2  422.36   23.80 
   3 -12   2  449.56   22.60 
   3  12   2  422.46   17.80 
  -3  12  -2  389.36   21.20 
  -3  12  -2  453.85   20.30 
  -3  12  -2  388.66   22.20 
   4 -12   2  193.88   16.80 
  -4 -12  -2  194.38   12.20 
  -4  12  -2  200.48   16.30 
  -4  12  -2  204.98   14.30 
   4  12   2  209.08   12.30 
  -5 -12  -2  179.58   11.60 
   5 -12   2  170.48   16.60 
   5  12   2  179.68   11.60 
  -5  12  -2  183.68   14.20 
  -6 -12  -2  527.15   20.90 
   6 -12   2  521.15   30.50 
  -6  12  -2  508.45   25.40 
   6  12   2  507.65   20.70 
  -7 -12  -2  281.87   15.00 
   7 -12   2  238.58   21.30 
  -7  12  -2  252.87   18.50 
   7  12   2  261.17   14.90 
   8 -12   2  236.08   22.10 
  -8 -12  -2  210.78   15.20 
   8  12   2  190.38   13.50 
  -8  12  -2  192.18   16.50 
  -9 -12  -2   30.50    6.60 
  -9 -12  -2   24.30    5.30 
   9 -12   2   19.80    8.00 
   9  12   2   13.80    5.20 
  -9  12  -2   14.80    6.40 
  10 -12   2   11.80    6.40 
 -10 -12  -2   22.20    5.90 
 -10 -12  -2   14.40    4.20 
 -10  12  -2    4.70    4.40 
  10  12   2    0.30    4.20 
 -11 -12  -2  105.89   10.70 
  11 -12   2  108.09   20.60 
 -11  12  -2   88.59   16.80 
 -11  12  -2  114.89   14.50 
 -12 -12  -2  129.89   11.80 
  12 -12   2  104.99   19.30 
 -12  12  -2  142.59   19.10 
 -12  12  -2  117.99   14.90 
 -13 -12  -2   29.40    7.00 
 -13  12  -2   20.10   14.40 
 -13  12  -2   30.70   11.80 
  13 -13  -2   12.70   10.30 
 -13  13   2    4.70    5.40 
  12 -13  -2  147.99   18.70 
 -12 -13   2  151.58    8.70 
 -12  13   2  117.39   16.10 
  11 -13  -2   32.80   10.20 
 -11 -13   2   35.10    5.00 
 -11 -13   2   39.40    6.10 
  11 -13  -2   37.70    9.50 
 -11  13   2   34.80    8.60 
  10 -13  -2    3.20    4.30 
 -10 -13   2    1.90    2.40 
  10 -13  -2    1.50    3.50 
 -10 -13   2   -3.20    2.90 
 -10  13   2   -3.80    3.00 
   9 -13  -2   42.50   10.90 
   9 -13  -2   50.39   11.70 
  -9 -13   2   38.80    5.30 
  -9 -13   2   42.60    4.60 
  -9  13   2   40.60    9.60 
   8 -13  -2   19.60    7.10 
   8 -13  -2    6.80    6.50 
  -8 -13   2   15.10    3.10 
  -8  13   2   10.90    6.00 
   7 -13  -2   44.20   10.50 
  -7 -13   2   23.70    4.00 
   7 -13  -2   31.00    9.30 
  -7  13   2   17.40    6.30 
   7  13  -2   27.70    3.90 
  -6 -13   2   46.40    4.90 
   6 -13  -2   53.09   11.30 
   6 -13  -2   39.00    9.40 
   6  13  -2   38.30    4.40 
  -6  13   2   40.80    8.40 
   5 -13  -2   -0.10    3.50 
  -5 -13   2    2.00    1.90 
   5 -13  -2    6.30    4.30 
  -5  13   2   -3.60    1.90 
   5  13  -2    5.40    2.10 
   4 -13  -2   52.29   10.50 
  -4 -13   2   51.99    4.20 
   4 -13  -2   52.39   10.00 
  -4 -13   2   45.30    5.60 
   4  13  -2   42.20    4.00 
   4  13  -2   46.50    4.50 
  -4  13   2   50.89    9.00 
   4  13  -2   49.70    4.90 
  -4  13   2   44.60    9.30 
   3 -13  -2   49.60    9.20 
   3 -13  -2   53.29   10.10 
  -3 -13   2   49.00    5.90 
  -3 -13   2   39.50    4.40 
   3  13  -2   45.60    4.20 
  -3  13   2   35.50    8.10 
   3  13  -2   40.40    5.00 
   3  13  -2   47.60    5.10 
  -3  13   2   49.80    7.00 
   2 -13  -2  100.39   11.40 
   2 -13  -2  120.49   10.60 
  -2 -13   2  115.19    9.40 
  -2 -13   2  112.69    7.80 
   2  13  -2  105.29    6.60 
   2  13  -2   93.99    7.80 
   2  13  -2  106.19    8.20 
  -2  13   2  109.69   10.40 
  -2  13   2   93.59    9.00 
  -2  13   2  108.69   10.80 
  -1 -13   2   91.99    8.90 
   1 -13  -2  100.49    9.10 
   1 -13  -2  105.39   11.00 
  -1 -13   2   93.79    7.90 
   1  13  -2   98.99    6.90 
   1  13  -2   87.49    8.30 
  -1  13   2   91.99    9.20 
  -1  13   2  107.39    8.70 
  -1  13   2   86.19    9.00 
   1  13  -2   79.19    7.70 
   0 -13   2   27.40    5.60 
   0 -13  -2   28.40    8.90 
   0 -13   2   32.10    6.70 
   0  13  -2   41.00    7.10 
   0  13   2   28.80    5.90 
   0  13   2   43.50    7.10 
   0  13   2   34.40    4.70 
   0  13  -2   30.20    6.20 
   0  13  -2   32.40    5.50 
   1 -13   2  344.37   19.70 
   1 -13   2  317.07   17.30 
  -1 -13  -2  330.37   18.00 
   1  13   2  338.17   12.60 
  -1  13  -2  323.17   15.30 
  -1  13  -2  327.77   18.40 
   1  13   2  322.87   16.80 
  -1  13  -2  320.97   17.50 
   1  13   2  350.16   14.70 
   2 -13   2  198.28   14.70 
  -2 -13  -2  202.38   13.50 
   2 -13   2  188.68   15.30 
   2  13   2  185.38    7.40 
   2  13   2  191.28    8.80 
  -2  13  -2  215.98   15.40 
   2  13   2  197.48   12.50 
  -2  13  -2  191.08   14.10 
   3 -13   2  295.07   20.10 
  -3 -13  -2  274.57   15.50 
   3  13   2  255.77   14.10 
  -3  13  -2  270.07   15.90 
  -3  13  -2  253.77   17.50 
  -3  13  -2  253.27   17.80 
  -4 -13  -2  516.75   21.40 
   4 -13   2  543.05   29.10 
  -4  13  -2  488.15   23.00 
   4  13   2  497.05   20.30 
  -5 -13  -2  149.99   11.20 
   5 -13   2  172.98   17.30 
   5  13   2  144.49   10.70 
  -5  13  -2  169.58   14.00 
  -6 -13  -2  181.98   12.20 
   6 -13   2  168.98   18.10 
  -6  13  -2  216.88   16.70 
   6  13   2  209.58   13.20 
   7 -13   2   89.19   15.20 
  -7 -13  -2  108.09   13.00 
  -7  13  -2  103.19   12.30 
  -8 -13  -2   19.70    4.80 
   8  13   2   10.40    4.80 
  -9 -13  -2   46.40    8.40 
   9 -13   2   48.80   12.60 
  -9 -13  -2   55.79    7.40 
  -9  13  -2   63.69   11.90 
   9  13   2   66.79    8.80 
 -10 -13  -2   -2.90    2.60 
  10 -13   2    4.50    6.10 
  10  13   2    5.70    5.20 
 -10  13  -2   -1.20    4.10 
 -11 -13  -2    5.30    3.40 
  11 -13   2   -0.60    5.70 
 -11  13  -2    0.70    3.60 
 -11  13  -2   -4.20    4.00 
 -12 -13  -2   11.10    3.80 
  12 -13   2   17.80    7.10 
 -12  13  -2   -1.30    4.10 
 -12  13  -2    5.30    4.70 
 -13 -13  -2   10.90    4.90 
  13 -13   2   41.70   12.40 
 -13  13  -2   17.60    8.00 
 -13  13  -2   18.70   10.10 
  13 -14  -2   78.09   17.00 
 -13  14   2  106.29   18.80 
  12 -14  -2   23.20    9.50 
 -12  14   2   25.30    8.10 
  11 -14  -2   76.69   16.40 
 -11  14   2   49.00   11.00 
 -10 -14   2  352.46   13.10 
 -10 -14   2  341.87   14.10 
  10 -14  -2  347.67   27.90 
  10 -14  -2  276.97   27.00 
 -10  14   2  352.56   25.90 
  -9 -14   2  122.19    7.50 
  -9 -14   2  121.89    8.20 
   9 -14  -2   72.19   15.10 
   9 -14  -2  104.69   14.90 
  -9  14   2   84.09   14.70 
   8 -14  -2  163.28   18.80 
  -8 -14   2  178.18   10.10 
  -8 -14   2  141.49    8.40 
   8 -14  -2  172.88   35.50 
   8  14  -2  162.68    8.80 
  -7 -14   2  262.47   11.80 
   7 -14  -2  294.37   22.90 
   7 -14  -2  316.27   24.80 
   7  14  -2  308.57   12.30 
  -7  14   2  294.07   21.50 
   6 -14  -2  188.98   17.40 
  -6 -14   2  152.88    9.20 
   6 -14  -2  162.78   17.30 
   6  14  -2  172.18    8.90 
  -6  14   2  180.88   15.90 
   5 -14  -2   78.29   13.60 
   5 -14  -2   82.69   11.10 
  -5 -14   2   84.99    7.00 
   5  14  -2   93.79    6.60 
  -5  14   2   74.19    9.90 
  -4 -14   2  295.97   10.90 
   4 -14  -2  278.77   21.10 
  -4 -14   2  254.27   13.00 
   4 -14  -2  255.87   18.50 
  -4  14   2  292.27   18.10 
   4  14  -2  277.97   10.40 
   4  14  -2  282.37   12.00 
   4  14  -2  284.47   12.50 
  -3 -14   2   73.19    6.00 
   3 -14  -2   75.69    9.30 
   3 -14  -2   59.19   10.90 
  -3 -14   2   65.99    7.40 
   3  14  -2   69.69    6.30 
  -3  14   2   66.99    9.40 
   3  14  -2   68.39    6.40 
  -3  14   2   71.39    8.60 
   3  14  -2   67.79    5.40 
   2 -14  -2    7.90    4.30 
  -2 -14   2    2.40    2.20 
  -2 -14   2    4.90    2.40 
   2 -14  -2    8.40    3.40 
   2  14  -2    5.70    2.40 
  -2  14   2   -0.60    3.10 
   2  14  -2    8.60    3.30 
   2  14  -2    4.70    2.50 
  -2  14   2    3.00    2.50 
  -1 -14   2  687.93   23.70 
   1 -14  -2  672.93   29.60 
  -1 -14   2  702.43   27.00 
   1  14  -2  689.93   24.90 
   1  14  -2  700.23   24.40 
  -1  14   2  693.63   27.00 
  -1  14   2  664.03   23.80 
  -1  14   2  669.73   27.30 
   1  14  -2  681.23   20.40 
   0 -14   2  371.46   18.10 
   0 -14   2  398.56   20.70 
   0 -14  -2  382.06   21.00 
   0  14  -2  373.36   15.60 
   0  14   2  366.96   18.70 
   0  14   2  358.06   17.20 
   0  14  -2  363.76   18.80 
   0  14   2  383.06   15.60 
   0  14  -2  375.76   18.40 
   1 -14   2    2.00    2.60 
  -1 -14  -2    6.00    3.50 
   1 -14   2    1.60    2.60 
  -1  14  -2    3.40    2.30 
   1  14   2    4.10    2.80 
   1  14   2    1.70    1.80 
  -1  14  -2   -1.80    2.00 
   1  14   2    1.00    2.40 
  -1  14  -2   -1.80    3.00 
   2 -14   2  772.62   33.20 
   2  14   2  769.32   20.90 
  -2  14  -2  798.72   27.40 
   2  14   2  754.82   17.90 
  -2  14  -2  774.62   30.70 
  -2  14  -2  801.72   32.30 
   2  14   2  827.62   28.70 
   3 -14   2  454.85   25.80 
  -3 -14  -2  388.26   20.50 
  -3  14  -2  420.56   20.20 
  -3  14  -2  406.46   24.70 
   4 -14   2  167.48   16.50 
  -4 -14  -2  136.09   10.90 
  -4  14  -2  138.79   12.20 
   4  14   2  147.49   13.10 
  -5 -14  -2  835.12   29.70 
   5 -14   2  876.61   40.60 
  -5  14  -2  862.01   33.40 
   6 -14   2  124.99   16.00 
  -6  14  -2   97.99   11.20 
   6  14   2  118.89   12.10 
   7 -14   2   42.10   11.40 
  -7 -14  -2   60.99    7.30 
   7  14   2   51.09    7.00 
  -7  14  -2   71.39   10.00 
   8 -14   2  229.98   22.10 
  -8 -14  -2  198.08   13.40 
  -8  14  -2  212.38   18.10 
   8  14   2  235.88   15.10 
   9 -14   2  228.78   23.50 
  -9 -14  -2  251.07   15.30 
   9  14   2  250.37   16.10 
  -9  14  -2  240.18   20.00 
 -10 -14  -2   -3.00    6.80 
  10 -14   2   34.60    8.20 
 -10 -14  -2   -3.70    3.20 
  11 -14   2  215.98   24.10 
 -11 -14  -2  279.47   16.70 
 -11  14  -2  262.07   22.10 
  12 -14   2  215.28   54.29 
 -12 -14  -2  153.88   13.10 
  13 -14   2    9.40    8.30 
 -13 -14  -2   13.50    6.00 
 -13  14  -2   23.00    7.20 
 -13  14  -2   18.60    9.10 
  13 -15  -2   11.40    8.70 
 -13  15   2   21.70    9.10 
 -12  15   2   16.30    7.40 
  11 -15  -2   -1.30    6.00 
 -11  15   2   -1.80    4.50 
  10 -15  -2    1.20    5.80 
 -10  15   2   -2.70    4.00 
  -9 -15   2    8.10    2.80 
   9 -15  -2    0.70    4.80 
   9 -15  -2   -2.00    4.00 
  -9  15   2   -2.40    3.40 
   8 -15  -2    6.30    5.50 
   8 -15  -2    3.00    5.80 
  -8 -15   2    0.40    2.30 
  -8 -15   2    4.10    3.20 
  -8  15   2    2.60    3.40 
   8  15  -2    3.00    2.50 
  -7 -15   2   15.80    3.90 
   7 -15  -2   26.60    8.30 
   7  15  -2   25.60    4.30 
  -7  15   2   21.60    7.00 
   6 -15  -2  256.77   22.20 
  -6 -15   2  209.38   11.40 
   6 -15  -2  248.48   20.60 
   6  15  -2  228.28   10.80 
  -6  15   2  240.58   18.60 
  -5 -15   2   85.39    7.40 
   5 -15  -2  112.39   13.20 
   5 -15  -2  113.89   14.70 
  -5  15   2  109.49   12.10 
   5  15  -2  100.89    7.40 
  -4 -15   2   42.90    5.50 
   4 -15  -2   32.60    7.70 
   4 -15  -2   39.70   10.00 
   4  15  -2   42.40    5.40 
  -4  15   2   49.10    8.90 
   4  15  -2   41.50    4.20 
  -3 -15   2  403.06   18.80 
   3 -15  -2  430.86   23.50 
   3 -15  -2  453.65   26.80 
  -3 -15   2  435.86   16.20 
  -3  15   2  420.46   21.40 
   3  15  -2  416.26   16.90 
  -3  15   2  423.96   24.10 
   3  15  -2  428.56   14.30 
   3  15  -2  425.56   16.70 
  -2 -15   2   55.89    7.40 
   2 -15  -2   65.29   11.40 
  -2 -15   2   67.79    6.80 
  -2  15   2   94.59    9.40 
  -2  15   2   57.19    9.60 
   2  15  -2   81.29    7.20 
   2  15  -2   66.69    5.70 
   2  15  -2   70.99    7.50 
   1 -15  -2   97.19   11.40 
  -1 -15   2   99.39    8.90 
  -1 -15   2  132.69   11.40 
   1  15  -2  102.99    7.70 
   1  15  -2  118.79    9.80 
   1  15  -2  121.09    9.90 
  -1  15   2  112.99   10.50 
  -1  15   2  117.79    9.50 
   0 -15  -2  319.67   19.80 
   0 -15   2  312.17   19.60 
   0  15  -2  302.07   16.90 
   0  15   2  320.87   14.30 
   0  15  -2  302.27   14.30 
   0  15  -2  301.27   17.50 
   0  15   2  297.27   17.10 
   0  15   2  334.87   16.90 
   1 -15   2   50.79    9.40 
  -1 -15  -2   48.40    8.50 
  -1  15  -2   54.99   12.50 
   1  15   2   59.89    9.40 
  -1  15  -2   57.49    9.30 
  -1  15  -2   66.59    8.60 
   1  15   2   42.90    4.90 
   1  15   2   42.80    6.50 
  -2 -15  -2    2.60    3.50 
   2 -15   2    0.50    3.80 
  -2  15  -2   10.40    4.80 
  -2  15  -2   11.60    3.90 
   2  15   2    8.30    3.50 
   2  15   2   13.80    4.70 
   2  15   2   10.20    2.40 
   3 -15   2  143.49   14.80 
  -3 -15  -2  154.08   12.40 
  -3  15  -2  165.08   12.70 
   3  15   2  143.49   11.10 
   4 -15   2  186.88   18.10 
  -4 -15  -2  243.78   15.30 
   4  15   2  208.68   13.40 
  -4  15  -2  204.38   14.90 
   5 -15   2  157.18   16.90 
  -5 -15  -2  143.39   11.50 
  -5  15  -2  124.29   12.50 
   5  15   2  118.89   10.40 
   6 -15   2  159.68   18.70 
  -6 -15  -2  181.08   12.50 
   6  15   2  159.18   11.80 
  -6  15  -2  177.58   15.40 
   7 -15   2   81.79   15.60 
  -7 -15  -2   78.59    8.70 
   7  15   2   84.09    9.60 
  -8 -15  -2   52.89    6.90 
   8 -15   2   44.80   11.10 
  -8  15  -2   49.50   10.50 
   8  15   2   58.99    8.40 
  -9 -15  -2  111.39   10.20 
   9 -15   2  116.79   20.40 
  -9  15  -2   94.39   13.10 
   9  15   2   93.09   10.80 
 -10 -15  -2  409.06   20.50 
  10 -15   2  362.46   31.50 
 -10  15  -2  368.66   26.20 
 -11 -15  -2   71.39    9.00 
  11 -15   2   68.09   16.70 
 -11  15  -2   48.80   11.60 
 -12 -15  -2   53.49    8.40 
  12 -15   2   56.39   13.70 
 -12  15  -2   55.99   12.50 
 -12  15  -2   44.70   11.20 
  12 -16  -2    8.50    8.20 
 -12  16   2   33.20   10.00 
  11 -16  -2   57.09   14.30 
 -11  16   2   42.00   11.10 
  10 -16  -2  160.68   19.70 
 -10  16   2  131.39   16.60 
   9 -16  -2   43.40   11.30 
  -9  16   2   48.40   10.50 
  -8 -16   2   60.39    6.30 
   8 -16  -2   80.89   16.60 
  -8 -16   2   68.09    7.00 
  -8  16   2   69.49   12.80 
   8  16  -2   63.79    6.00 
  -7 -16   2   70.59    6.70 
   7 -16  -2   61.59   12.80 
   7  16  -2   60.19    6.20 
  -6 -16   2  224.58   12.10 
   6 -16  -2  253.47   25.10 
  -6  16   2  237.58   19.00 
   6  16  -2  250.27   11.90 
  -5 -16   2   51.39    7.40 
   5 -16  -2   73.99   14.20 
  -5  16   2   76.89   10.20 
   5  16  -2   58.59    6.30 
   4 -16  -2  157.98   16.90 
  -4 -16   2  120.89    9.60 
   4  16  -2  128.69    9.20 
   4  16  -2  132.59    7.30 
  -4  16   2  146.99   13.50 
  -3 -16   2  118.39   10.40 
   3 -16  -2  136.79   15.20 
  -3  16   2  133.59   12.30 
   3  16  -2  153.28    9.90 
   3  16  -2  150.58    8.30 
   3  16  -2  139.59   10.00 
  -2 -16   2    2.50    2.60 
   2 -16  -2    3.60    4.00 
   2  16  -2   -3.90    2.30 
  -2  16   2    0.40    2.10 
   2  16  -2    3.30    1.90 
  -2  16   2    1.80    3.70 
   2  16  -2   -4.60    2.40 
   1 -16  -2   10.90    4.10 
  -1 -16   2    5.90    3.70 
  -1  16   2    5.60    3.70 
   1  16  -2    7.70    3.50 
   1  16  -2   11.50    3.70 
   1  16  -2    9.30    3.00 
  -1  16   2    7.10    3.40 
   0 -16   2  353.76   21.10 
   0 -16  -2  401.46   23.10 
   0  16  -2  374.46   20.40 
   0  16   2  403.26   19.30 
   0  16   2  379.56   16.30 
   0  16  -2  414.96   20.50 
   0  16  -2  383.36   16.60 
  -1 -16  -2   -1.40    3.60 
   1 -16   2    3.70    5.40 
  -1  16  -2    4.60    2.50 
   1  16   2    7.00    2.70 
  -1  16  -2   12.10    5.00 
  -1  16  -2   13.60    5.00 
   1  16   2   10.70    3.60 
   2 -16   2  114.59   13.20 
  -2 -16  -2  107.89   10.90 
   2  16   2   96.09    5.90 
  -2  16  -2   97.49   20.10 
   2  16   2   94.39    7.00 
   2  16   2   95.59    9.80 
  -2  16  -2  102.69    9.80 
  -3 -16  -2  289.77   17.70 
   3 -16   2  279.67   21.30 
   3  16   2  278.17   16.00 
  -3  16  -2  283.27   17.20 
  -4 -16  -2    6.90    3.10 
   4 -16   2    0.20    3.70 
  -4  16  -2    3.50    3.20 
   4  16   2   -3.40    2.90 
  -5 -16  -2  168.28   12.90 
   5 -16   2  161.68   18.10 
  -5  16  -2  172.08   14.70 
   5  16   2  175.38   12.50 
   6 -16   2  123.29   21.30 
  -6 -16  -2  164.58   12.40 
  -6  16  -2  138.09   14.00 
   6  16   2  176.48   12.40 
  -7 -16  -2   -5.00    2.50 
   7 -16   2    9.80    6.00 
   7  16   2    3.60    4.00 
  -7  16  -2   -3.00    3.10 
  -8 -16  -2   28.30    6.10 
   8 -16   2   39.70   11.30 
  -8  16  -2   39.60    9.30 
   8  16   2   28.60    6.70 
   9 -16   2   -8.50    4.30 
  -9 -16  -2   -4.50    3.20 
 -10 -16  -2   20.00    5.90 
  10 -16   2   11.50    8.70 
 -10  16  -2   38.30   10.50 
 -11 -16  -2   24.40    5.20 
 -11  16  -2   20.70   13.80 
  12 -16   2   11.30    6.50 
 -12 -16  -2    0.60    4.20 
 -12  16  -2    2.30    5.50 
 -12  16  -2    6.10    7.80 
  12 -17  -2   33.30   12.70 
 -12  17   2   67.89   13.50 
  11 -17  -2  299.77   36.70 
  10 -17  -2   63.19   14.40 
 -10  17   2   54.99   11.50 
   9 -17  -2   88.19   16.20 
  -9  17   2  111.69   14.70 
   8 -17  -2  565.54   38.30 
  -8 -17   2  515.65   17.90 
  -8  17   2  493.45   30.40 
   8  17  -2  507.95   17.00 
  -7 -17   2   10.40    3.70 
   7 -17  -2   15.10    6.60 
   7  17  -2   20.80    4.00 
  -7  17   2   16.30    6.10 
   6 -17  -2  285.17   24.40 
  -6 -17   2  281.07   14.20 
   6  17  -2  245.58   12.30 
  -6  17   2  253.97   20.00 
  -5 -17   2  595.34   23.20 
   5 -17  -2  684.63   38.60 
   5  17  -2  700.83   22.40 
  -5  17   2  681.93   31.60 
   4 -17  -2   46.10   11.30 
  -4 -17   2   57.39    7.00 
   4  17  -2   44.40    6.30 
   4  17  -2   50.19    4.70 
  -4  17   2   52.29    9.40 
   4  17  -2   54.79    6.90 
  -3 -17   2  482.95   22.90 
   3 -17  -2  560.14   31.50 
  -3  17   2  605.94   26.40 
   3  17  -2  592.64   21.00 
   3  17  -2  580.44   17.80 
   3  17  -2  565.14   21.90 
   2 -17  -2  227.08   19.30 
  -2 -17   2  244.38   26.00 
   2  17  -2  278.17   12.30 
   2  17  -2  252.77   14.90 
   2  17  -2  284.47   15.50 
  -2  17   2  259.07   15.90 
  -2  17   2  238.18   17.30 
  -1 -17   2   86.49    9.80 
   1 -17  -2   76.99   12.90 
  -1  17   2   85.29    9.90 
   1  17  -2  113.89   10.20 
   1  17  -2   87.19    7.30 
   1  17  -2   99.39    9.50 
   0 -17  -2  212.38   17.10 
   0 -17   2  219.78   16.60 
   0  17   2  205.38   11.80 
   0  17  -2  205.88   15.00 
   0  17  -2  203.28   19.40 
   0  17   2  217.98   14.20 
   0  17  -2  201.18   14.70 
   1 -17   2  119.49   13.40 
  -1 -17  -2  125.19   13.20 
  -1  17  -2  132.69   10.70 
   1  17   2  144.49    8.80 
  -1  17  -2  152.28   13.70 
   1  17   2  134.09   10.10 
  -2 -17  -2    5.40    3.20 
   2 -17   2    2.50    3.90 
  -2  17  -2    0.90    2.90 
   2  17   2   -0.90    1.60 
   3 -17   2   72.29   13.30 
  -3 -17  -2   74.69    9.40 
  -3  17  -2   87.69    9.90 
   4 -17   2  109.49   14.40 
  -4 -17  -2  106.79   10.70 
  -4  17  -2  125.59   11.80 
   4  17   2  113.69   10.70 
  -5 -17  -2   38.40    7.40 
   5 -17   2   55.39   12.50 
   5  17   2   53.09    8.50 
  -5  17  -2   45.20    9.30 
   6 -17   2   12.10    6.20 
  -6 -17  -2   14.70    3.90 
   6  17   2    5.40    4.40 
   7 -17   2  163.28   19.60 
  -7 -17  -2  182.88   13.50 
  -7  17  -2  166.98   16.50 
   7  17   2  174.78   13.80 
   8 -17   2  149.59   19.90 
  -8 -17  -2  137.59   12.00 
  -8  17  -2  139.59   15.60 
   9 -17   2   57.59   13.70 
  -9 -17  -2   57.29    7.90 
  -9  17  -2   89.99   12.20 
 -10 -17  -2  228.78   15.30 
  10 -17   2  249.68   26.50 
 -10  17  -2  239.38   21.10 
 -11 -17  -2   37.30    7.00 
  11 -17   2   36.60   12.40 
 -11  17  -2   27.50    9.20 
  11 -18  -2    3.90    8.70 
 -11  18   2   -6.90    4.20 
  10 -18  -2   10.10    7.80 
 -10  18   2   -4.40    5.30 
   9 -18  -2   17.50    8.20 
  -9  18   2   23.40    7.90 
   8 -18  -2    9.60    7.20 
  -8 -18   2   20.30    4.50 
  -8  18   2   16.00    7.30 
   7 -18  -2   83.89   16.60 
  -7 -18   2   61.39    6.80 
  -7  18   2   57.99   12.00 
   7  18  -2   69.29    7.20 
  -6 -18   2   38.10    6.20 
   6 -18  -2   33.90   11.00 
   6  18  -2   37.50    6.00 
   5 -18  -2   20.60    7.90 
  -5 -18   2   27.00    5.40 
   5  18  -2   18.70    4.80 
  -5  18   2    6.70    5.70 
   4 -18  -2   -2.70    5.50 
  -4 -18   2    0.50    3.40 
   4  18  -2   -0.30    2.60 
   4  18  -2   -1.20    1.80 
   4  18  -2    2.70    3.00 
  -4  18   2    3.80    3.90 
   3 -18  -2   21.80    8.40 
   3  18  -2   18.80    4.10 
  -3  18   2   30.20    6.90 
   3  18  -2   22.60    5.10 
   3  18  -2   40.00    6.90 
   2 -18  -2    6.70    5.30 
  -2 -18   2    6.40    3.60 
   2  18  -2    2.30    2.40 
   2  18  -2    5.10    3.30 
  -2  18   2   11.10    4.20 
   2  18  -2   -0.60    2.30 
   1 -18  -2    9.70    5.40 
   1  18  -2   11.20    4.30 
   1  18  -2    8.40    2.90 
  -1  18   2   12.80    5.20 
   0 -18  -2   25.50    7.60 
   0 -18   2   45.00    9.30 
   0  18   2   38.10    7.40 
   0  18  -2   31.10    6.80 
   0  18  -2   31.60    5.90 
   0  18   2   32.30    5.80 
   1 -18   2    5.30    4.20 
  -1 -18  -2    8.30    3.90 
  -1  18  -2    7.10    3.90 
   1  18   2   14.30    4.10 
   1  18   2    1.90    2.30 
  -2 -18  -2   19.60    6.10 
   2 -18   2   29.30    8.50 
  -2  18  -2   34.50    6.80 
   2  18   2   37.30    5.40 
   2  18   2   25.10    3.90 
  -3 -18  -2   58.49   10.00 
   3 -18   2   66.89   13.40 
  -3  18  -2   67.59    8.90 
  -4 -18  -2   -2.90    3.20 
   4 -18   2    5.80    5.40 
  -4  18  -2    7.40    4.30 
   5 -18   2    8.10    5.30 
  -5 -18  -2    1.50    2.90 
  -5  18  -2   -6.00    2.50 
  -6 -18  -2    1.90    3.70 
   6 -18   2   -1.10    5.80 
  -6  18  -2   -1.00    4.10 
   7 -18   2    7.20    5.00 
  -7 -18  -2    6.00    4.60 
  -7  18  -2   21.00    6.20 
  -8 -18  -2   27.30    6.90 
   8 -18   2   46.90   13.00 
  -8  18  -2   27.40    7.00 
  -9 -18  -2   29.20    6.10 
   9 -18   2   15.10    8.80 
  -9  18  -2   26.30    7.40 
 -10 -18  -2    4.50    4.50 
  10 -18   2   10.50   12.00 
  11 -18   2    9.10    8.40 
 -11 -18  -2   -6.80    3.90 
 -11  18  -2   -3.80    4.80 
 -11  19   2  145.29   17.30 
  10 -19  -2   28.90   12.20 
   9 -19  -2  109.89   20.40 
  -9  19   2   96.89   17.40 
  -8 -19   2  466.35   17.60 
   8 -19  -2  419.86   33.50 
  -8  19   2  410.26   27.70 
   8  19  -2  433.56   16.30 
  -7 -19   2    7.40    3.30 
   7 -19  -2   -2.90    6.40 
   7  19  -2   -7.60    3.10 
  -7  19   2    5.70    4.60 
   6 -19  -2   11.60    8.30 
  -6 -19   2   14.90    4.30 
   6  19  -2   18.50    4.50 
  -6  19   2   10.80    6.10 
   5 -19  -2  258.07   24.60 
  -5 -19   2  273.97   16.10 
  -5  19   2  267.77   19.80 
   5  19  -2  268.57   14.40 
   4 -19  -2  202.08   20.10 
  -4  19   2  189.38   15.70 
   4  19  -2  211.58   17.00 
   3 -19  -2  137.59   17.30 
  -3 -19   2  140.39   12.60 
   3  19  -2  152.08   12.10 
  -3  19   2  169.28   14.00 
   3  19  -2  158.48   11.10 
   3  19  -2  150.68    8.90 
   2 -19  -2  130.99   16.00 
  -2 -19   2  150.88   13.40 
  -2  19   2  153.78   12.50 
   2  19  -2  134.19   11.80 
   2  19  -2  142.59   12.10 
   2  19  -2  147.09    9.40 
   1 -19  -2   39.50    9.90 
  -1 -19   2   41.60    8.40 
  -1  19   2   42.70    7.50 
  -1  19   2   51.19    8.80 
   1  19  -2   45.40    8.90 
   1  19  -2   47.30    9.50 
   0 -19  -2   44.90   10.30 
   0 -19   2   50.29   10.40 
   0  19  -2   49.80    6.80 
   0  19  -2   49.10    9.10 
   0  19   2   59.39   14.70 
   0  19   2   57.39    6.60 
   1 -19   2   99.89   13.10 
  -1 -19  -2   98.89   12.50 
   1  19   2   93.39    7.30 
  -1  19  -2   99.59    9.50 
   1  19   2  101.19    9.50 
   2 -19   2    9.50    6.10 
  -2 -19  -2   13.10    4.60 
  -2  19  -2   -0.60    3.20 
   2  19   2    4.80    2.20 
   2  19   2    1.20    2.70 
  -3 -19  -2   14.20    5.70 
   3 -19   2   22.30    9.40 
  -3  19  -2    9.70    4.40 
  -4 -19  -2   63.39   10.60 
  -4  19  -2   54.09    9.50 
   5 -19   2   30.70    9.70 
  -5 -19  -2   28.30    5.50 
  -5  19  -2   16.90    6.10 
   6 -19   2   12.60    8.40 
  -6 -19  -2    7.40    4.70 
  -6  19  -2    5.50    4.10 
  -7 -19  -2  143.59   12.50 
   7 -19   2  157.88   19.20 
  -7  19  -2  146.89   15.80 
  -8 -19  -2   30.70    6.50 
   8 -19   2   18.60    6.80 
  -8  19  -2   17.70    6.60 
  -9 -19  -2  117.79   11.60 
   9 -19   2  119.69   21.30 
  -9  19  -2  114.59   14.90 
 -10 -19  -2  159.58   13.70 
  10 -19   2  113.69   21.70 
 -10  19  -2  178.48   18.20 
  10 -20  -2  209.98   25.40 
 -10  20   2  266.97   23.50 
   9 -20  -2  220.88   25.60 
  -9  20   2  238.78   22.40 
   8 -20  -2  102.99   18.50 
  -8  20   2   86.09   15.20 
  -7 -20   2  219.58   12.70 
   7 -20  -2  222.98   24.30 
  -7  20   2  237.78   20.60 
   7  20  -2  169.28   11.70 
   6 -20  -2  314.47   27.70 
  -6 -20   2  287.67   15.90 
  -6  20   2  269.77   20.90 
   6  20  -2  271.77   14.10 
   5 -20  -2   38.70   11.30 
  -5  20   2   31.30   12.50 
   4 -20  -2  240.38   22.80 
  -4 -20   2  255.47   17.10 
   4  20  -2  249.97   15.00 
  -4  20   2  252.67   18.50 
   3 -20  -2  429.16   30.60 
  -3 -20   2  441.26   23.40 
   3  20  -2  427.76   20.90 
   3  20  -2  455.05   16.40 
  -3  20   2  453.05   23.80 
   3  20  -2  446.36   19.10 
   2 -20  -2  176.08   23.30 
  -2 -20   2  180.38   15.80 
  -2  20   2  215.58   15.10 
   2  20  -2  212.78   11.60 
   2  20  -2  201.48   13.90 
   1 -20  -2   58.39   12.30 
  -1 -20   2   50.59   10.30 
   1  20  -2   58.09    6.50 
  -1  20   2   60.49    7.60 
  -1  20   2   40.80    9.70 
   1  20  -2   61.49    9.80 
   0 -20   2   16.70    7.20 
   0 -20  -2   22.10    7.60 
   0  20   2   17.10    5.90 
   0  20  -2   30.20    5.70 
   0  20   2   15.90    7.30 
  -1 -20  -2   27.70    7.70 
   1 -20   2   17.60    6.00 
  -1  20  -2   21.70    5.30 
   1  20   2   24.00    4.20 
   1  20   2   34.10    5.80 
   2 -20   2   48.80   11.00 
  -2 -20  -2   58.69   11.00 
  -2  20  -2   66.59    9.40 
   2  20   2   58.99    6.80 
   2  20   2   51.59    5.30 
   3 -20   2  102.39   24.00 
  -3 -20  -2   85.29   11.60 
  -3  20  -2  101.49   11.70 
  -4 -20  -2   18.00    6.60 
   4 -20   2   23.90    9.60 
  -4  20  -2   13.80    5.80 
  -5 -20  -2   40.10    8.30 
   5 -20   2   23.60    9.60 
  -5  20  -2   45.70    9.40 
   6 -20   2   43.10   10.90 
  -6 -20  -2   60.99   10.60 
  -6  20  -2   61.29   12.10 
  -7 -20  -2   -2.50    3.70 
  -7  20  -2   -4.60    4.10 
  -8 -20  -2   76.49   10.10 
   8 -20   2   82.29   17.50 
  -8  20  -2   54.69   10.90 
  -9 -20  -2   33.20    7.00 
   9 -20   2   17.20    9.30 
  10 -20   2   -2.60    8.60 
   9 -21  -2   30.10   12.20 
  -9  21   2   31.80   11.70 
  -8  21   2   -1.10    4.70 
  -7 -21   2   -3.10    3.40 
   7 -21  -2   11.80    7.40 
  -7  21   2    1.70    5.00 
   6 -21  -2   38.50   10.00 
  -6 -21   2   24.40    5.70 
   6  21  -2   28.70    7.80 
  -6  21   2   26.60    7.60 
   5 -21  -2    2.20    5.80 
  -5 -21   2   -1.90    3.80 
  -5  21   2   12.40    5.20 
   5  21  -2    1.80    4.70 
   4 -21  -2   16.80    9.30 
  -4 -21   2   35.20    7.40 
   4  21  -2   29.00    6.30 
  -4  21   2   32.80    8.00 
   3 -21  -2  233.18   23.60 
  -3 -21   2  236.38   17.80 
   3  21  -2  249.97   14.30 
   3  21  -2  228.08   11.80 
  -3  21   2  233.78   17.20 
  -2 -21   2   30.50    8.80 
   2 -21  -2   34.70    9.90 
  -2  21   2   38.90    7.80 
   2  21  -2   24.90    6.70 
   2  21  -2   25.50    5.10 
  -1 -21   2   62.99   11.70 
  -1  21   2   83.09    9.10 
   1  21  -2   78.69    7.90 
   1  21  -2   95.59   10.70 
   0 -21   2   53.89   11.20 
   0 -21  -2   61.99   13.00 
   0  21   2   54.09    9.30 
   0  21   2   73.09    7.90 
   0  21  -2   61.09    7.90 
   1 -21   2    4.40    5.30 
  -1 -21  -2    2.70    4.30 
   1  21   2    5.80    2.40 
   1  21   2   -7.30    4.00 
  -1  21  -2    3.70    3.20 
   2 -21   2  124.19   17.70 
  -2 -21  -2  149.49   16.30 
   2  21   2  150.08   10.00 
   2  21   2  145.59    8.00 
  -2  21  -2  138.79   12.70 
  -3 -21  -2    3.30    5.60 
   3 -21   2    3.50    5.50 
  -3  21  -2   -0.10    3.60 
  -4 -21  -2    0.10    3.70 
  -4  21  -2    4.90    4.20 
  -5 -21  -2    4.40    5.20 
   5 -21   2    8.10    8.10 
  -5  21  -2    3.00    4.80 
  -6 -21  -2   13.50    4.60 
   6 -21   2    9.30    6.80 
  -6  21  -2    1.20    4.60 
   7 -21   2   36.20   10.90 
  -7 -21  -2   30.40    8.50 
  -7  21  -2   22.50    8.00 
  -8 -21  -2   34.50    8.20 
  -8  21  -2   28.10    8.80 
  -9 -21  -2   15.40    5.90 
   9 -21   2    1.50    7.80 
  -9  21  -2    2.10    5.60 
   8 -22  -2    9.80    8.40 
  -8  22   2   11.60    7.80 
   7 -22  -2  180.18   41.00 
  -7  22   2  177.78   18.10 
  -6 -22   2   19.00    5.50 
   6 -22  -2   -0.20    5.70 
  -6  22   2    1.70    5.70 
   5 -22  -2   65.29   14.70 
  -5 -22   2   66.69    9.70 
  -5  22   2   72.59   10.30 
   4 -22  -2  308.87   28.20 
  -4 -22   2  398.96   22.80 
  -4  22   2  361.56   25.00 
  -3 -22   2   -5.20    3.90 
   3 -22  -2   -8.60    5.40 
  -3  22   2   -6.40    4.70 
   3  22  -2    0.70    3.00 
   3  22  -2    8.40    5.00 
  -2 -22   2   82.99   13.20 
   2 -22  -2  120.69   16.70 
  -2  22   2   99.39   11.00 
   2  22  -2   87.19    8.80 
   1 -22  -2  169.98   18.50 
  -1 -22   2  206.38   18.80 
  -1  22   2  178.38   13.40 
   1  22  -2  211.48   16.20 
   1  22  -2  192.78   12.10 
   0 -22   2   40.20    9.90 
   0 -22  -2   34.10    9.80 
   0  22  -2   59.89    7.80 
   0  22   2   60.19    9.90 
   0  22   2   47.80    6.70 
   1 -22   2   75.79   15.50 
  -1 -22  -2   66.19   14.10 
   1  22   2  102.49   10.40 
   1  22   2   85.19    7.60 
  -1  22  -2   87.49   10.30 
  -2 -22  -2  395.46   27.30 
   2 -22   2  392.96   29.10 
   2  22   2  375.06   16.30 
   2  22   2  389.56   13.50 
  -2  22  -2  393.96   21.60 
  -3 -22  -2  159.28   17.30 
   3 -22   2  173.98   20.40 
  -3  22  -2  145.09   24.10 
  -4 -22  -2    3.30    6.00 
   4 -22   2   19.40    8.30 
  -4  22  -2   10.90    5.50 
  -5 -22  -2  223.48   18.30 
   5 -22   2  178.48   21.80 
  -5  22  -2  223.98   18.20 
   6 -22   2   58.19   15.00 
  -6 -22  -2   66.79   12.10 
  -6  22  -2   53.79   10.50 
   7 -22   2   11.60    9.70 
  -7 -22  -2    6.50    6.10 
  -7  22  -2    1.10    5.10 
  -8 -22  -2  187.08   15.60 
   8 -22   2  188.98   23.40 
  -8  22  -2  216.78   20.50 
   7 -23  -2   14.00    8.80 
  -7  23   2    5.60    5.80 
   6 -23  -2    4.20    8.10 
  -6 -23   2   13.50    6.40 
  -6  23   2   23.50    7.90 
   5 -23  -2   -3.90    7.80 
  -5 -23   2   17.20    6.10 
  -5  23   2   -7.60    4.20 
  -4 -23   2    8.20    5.60 
   4 -23  -2    1.30    6.70 
  -4  23   2    3.50    6.10 
  -3 -23   2   30.70    7.90 
   3 -23  -2   33.90   11.00 
   3  23  -2   48.80    6.50 
  -3  23   2   36.50    8.70 
   2 -23  -2   99.19   17.90 
  -2 -23   2  121.29   14.30 
  -2  23   2  101.19   11.00 
   2  23  -2   94.19   14.80 
   1 -23  -2   19.60    8.40 
  -1 -23   2   31.80    9.50 
  -1  23   2   16.80    5.60 
   1  23  -2   19.20    5.60 
   0 -23   2   33.30   10.00 
   0 -23  -2   31.70   10.20 
   0  23   2   46.60   13.90 
   0  23  -2   36.00    7.50 
   0  23   2   29.20    5.90 
  -1 -23  -2  157.98   18.00 
   1 -23   2  142.39   18.10 
  -1  23  -2  140.89   12.60 
   1  23   2  123.99    9.20 
   1  23   2  139.49   18.00 
   2 -23   2   17.10    8.50 
  -2 -23  -2   38.40   10.70 
   2  23   2   21.60    4.20 
  -2  23  -2   31.40    7.80 
   3 -23   2  289.47   26.90 
  -3 -23  -2  327.87   26.10 
  -3  23  -2  337.27   21.10 
  -4 -23  -2  108.39   16.40 
   4 -23   2   72.29   15.70 
  -4  23  -2   91.19   12.20 
   5 -23   2   23.10    7.80 
  -5 -23  -2   -8.00    4.40 
  -5  23  -2   -2.70    5.10 
   6 -23   2   97.49   20.30 
  -6 -23  -2  157.58   15.30 
  -6  23  -2  147.89   15.80 
   7 -23   2  102.59   20.30 
  -7 -23  -2  176.38   15.40 
  -7  23  -2  125.59   21.30 
   6 -24  -2   20.20    8.60 
  -6  24   2    3.40    5.60 
  -5 -24   2    9.50    6.00 
  -5  24   2   24.90    7.20 
   4 -24  -2   21.10    7.60 
  -4 -24   2   23.60    7.10 
  -4  24   2   14.10    6.70 
  -3 -24   2   -3.10    6.30 
   3 -24  -2   15.30    8.80 
   3  24  -2   -1.80    3.70 
  -3  24   2    1.50    4.50 
  -2 -24   2    2.90    5.80 
   2 -24  -2    7.90    7.00 
   2  24  -2   11.40    4.50 
  -2  24   2    2.10    4.20 
   1 -24  -2    8.90    7.20 
  -1 -24   2    9.90    7.40 
  -1  24   2    2.00    4.30 
   1  24  -2    9.10    4.80 
   0 -24  -2   20.10    9.50 
   0 -24   2    2.40    6.60 
   0  24   2   14.80    4.80 
   0  24  -2    9.90    5.10 
  -1 -24  -2    5.30    6.40 
   1 -24   2   12.70    9.00 
  -1  24  -2    5.60    4.90 
   1  24   2    8.20    4.70 
  -2 -24  -2   -6.90    5.80 
   2 -24   2   -1.10    7.20 
  -2  24  -2   12.70   10.30 
   3 -24   2    6.70    7.30 
  -3 -24  -2   15.00    8.40 
  -3  24  -2   11.30    6.50 
   4 -24   2   -5.10    6.30 
  -4 -24  -2    4.10    7.00 
  -4  24  -2    5.30    6.20 
  -5 -24  -2    2.50    7.80 
   5 -24   2  -10.00    5.20 
  -5  24  -2    7.80    5.30 
   6 -24   2   22.30   11.10 
  -6 -24  -2    6.60    7.70 
  -6  24  -2    9.00    6.00 
  -4 -25   2   -7.60    6.40 
  -4  25   2    5.10    5.90 
   3 -25  -2   26.30    9.10 
  -3 -25   2   33.40    8.80 
  -3  25   2   17.30    6.20 
   2 -25  -2  237.48   23.70 
  -2 -25   2  238.68   26.00 
   2  25  -2  196.48   13.10 
  -2  25   2  223.38   16.70 
  -1 -25   2   26.80    8.70 
   1 -25  -2   25.00    8.90 
  -1  25   2   19.20    5.80 
   1  25  -2   13.40    5.20 
   0 -25  -2   59.29   14.20 
   0 -25   2   76.19   15.30 
   0  25  -2   95.39   10.60 
   0  25   2   77.19    9.40 
   1 -25   2  198.58   22.90 
  -1 -25  -2  220.58   23.10 
  -1  25  -2  208.78   15.80 
  -2 -25  -2   31.90   11.10 
   2 -25   2   53.29   12.70 
  -2  25  -2   51.79    9.40 
   3 -25   2  248.68   24.60 
  -3 -25  -2  176.78   20.60 
  -3  25  -2  218.48   18.10 
  -4 -25  -2  157.88   19.30 
   4 -25   2  167.28   20.60 
  -4  25  -2  122.99   14.60 
   2 -26  -2   33.80   11.90 
  -2 -26   2   42.70   13.40 
  -2  26   2   27.90   14.30 
  -1 -26   2   70.49   15.20 
   1 -26  -2   62.09   13.30 
  -1  26   2   46.50    8.70 
   1  26  -2   49.20    8.80 
   0 -26  -2   -2.10    7.80 
   0 -26   2   12.10    8.80 
   0  26   2    6.20    5.20 
   0  26  -2    3.90    5.30 
   1 -26   2    1.30    7.30 
 -16   0   3   -2.40    5.30 
 -16   0   3    0.60    5.10 
 -15   0   3   -2.80    4.60 
 -15   0   3    4.30    5.10 
  15   0  -3    0.40    5.50 
  14   0  -3    9.10    5.20 
 -14   0   3    8.90    4.20 
 -14   0   3    0.00    4.40 
 -13   0   3   -4.90    3.50 
  13   0  -3   -0.80    4.10 
  13   0  -3   -2.80    3.80 
 -13   0   3    1.60    3.80 
 -12   0   3   -3.60    3.10 
  12   0  -3   -3.00    3.40 
  12   0  -3    1.50    3.60 
 -12   0   3    1.10    2.80 
  11   0  -3    3.10    3.40 
 -11   0   3    0.80    4.60 
 -11   0   3    6.10    3.50 
  11   0  -3   -3.00    3.10 
 -11   0   3   -2.40    2.00 
  10   0  -3   -3.50    2.30 
 -10   0   3   -2.00    2.40 
 -10   0   3   -0.10    2.70 
  10   0  -3    1.20    2.80 
   9   0  -3    1.90    2.50 
   9   0  -3   -1.40    2.30 
  -9   0   3   -2.70    2.10 
  -9   0   3   -4.30    2.00 
  -9   0   3    1.80    2.20 
   8   0  -3    0.20    2.20 
  -8   0   3    5.90    2.50 
  -8   0   3   -0.20    1.90 
  -7   0   3   -3.30    1.30 
   7   0  -3   -2.60    1.30 
  -7   0   3   -1.00    1.60 
   6   0  -3    1.90    1.90 
  -6   0   3    1.40    1.80 
  -6   0   3    3.10    2.10 
   6   0  -3    0.70    1.50 
  -5   0   3   -2.40    1.10 
   5   0  -3   -0.70    1.20 
   5   0  -3   -0.80    1.00 
  -5   0   3   -0.90    1.30 
   4   0  -3    0.50    1.50 
  -4   0   3    3.10    1.40 
   4   0  -3    1.00    1.20 
  -4   0   3   -1.80    0.90 
   3   0  -3    1.60    1.20 
  -3   0   3   -0.30    0.70 
  -3   0   3    0.70    1.00 
   3   0  -3    0.70    1.10 
  -2   0   3   -0.30    0.60 
   2   0  -3    0.00    1.10 
   2   0  -3    0.20    0.70 
  -2   0   3    0.10    0.80 
  -1   0   3    0.70    0.50 
  -1   0   3    1.10    0.90 
   1   0  -3    0.00    0.40 
   1   0  -3   -0.70    0.50 
   0   0   3    0.50    0.70 
   0   0   3   -0.20    0.60 
   0   0  -3   -0.60    0.50 
   0   0  -3    0.00    0.50 
   1   0   3    0.30    0.80 
  -1   0  -3    0.70    0.70 
  -1   0  -3    0.20    0.50 
   1   0   3    3.50    1.20 
  -2   0  -3    0.20    1.00 
   2   0   3    1.00    0.90 
   3   0   3   -0.80    0.80 
  -3   0  -3   -0.70    1.00 
  -3   0  -3   -1.50    1.20 
  -3   0  -3    0.60    1.10 
   3   0   3    0.30    1.00 
   4   0   3    1.80    1.30 
  -4   0  -3    0.70    1.30 
  -4   0  -3    0.30    1.20 
  -4   0  -3    2.30    1.80 
   4   0   3   -0.20    1.20 
  -4   0  -3    2.40    1.80 
   5   0   3    3.90    2.20 
  -5   0  -3    1.30    1.60 
  -5   0  -3    4.40    2.60 
  -5   0  -3    3.20    2.00 
   5   0   3   -1.30    1.40 
  -5   0  -3    0.70    1.40 
  -6   0  -3    1.90    2.00 
  -6   0  -3   -1.40    1.60 
  -6   0  -3    1.20    1.50 
  -6   0  -3    3.90    2.30 
   6   0   3    0.20    1.50 
  -7   0  -3    1.00    2.20 
  -7   0  -3    2.40    1.80 
  -7   0  -3   -0.80    2.20 
  -8   0  -3    1.00    2.40 
  -8   0  -3    2.70    3.30 
  -8   0  -3   -0.80    2.40 
  -9   0  -3   -2.50    2.80 
  -9   0  -3    2.20    2.40 
 -10   0  -3    3.20    3.70 
 -11   0  -3    4.10    3.00 
 -11   0  -3    2.70    2.50 
 -12   0  -3    4.80    4.40 
 -13   0  -3   -7.50    3.00 
 -13   0  -3    6.20    5.10 
 -14   0  -3    8.60    5.60 
 -14   0  -3    3.80    4.70 
 -15   0  -3   -2.60    4.40 
 -15   0  -3    1.30    4.50 
 -16  -1   3    1.40    4.80 
 -16   1   3    1.70    5.30 
 -16   1   3    3.70    6.10 
  15  -1  -3   77.19   15.50 
 -15  -1   3   30.00    9.10 
 -15   1   3   50.59   10.90 
 -15   1   3   66.79   11.90 
  15   1  -3   62.39   13.50 
 -14  -1   3  179.68   17.80 
  14  -1  -3  198.58   19.60 
 -14  -1   3  186.68   16.90 
  14  -1  -3  215.88   20.90 
 -14   1   3  183.78   17.50 
 -14   1   3  199.68   19.60 
  14   1  -3  167.58   17.90 
  13  -1  -3   66.89   13.40 
 -13  -1   3   52.29    9.80 
 -13  -1   3   59.79   12.10 
 -13   1   3   91.69   20.70 
  13   1  -3   89.19   15.30 
 -13   1   3   73.09   12.40 
  12  -1  -3  537.55   30.10 
 -12  -1   3  533.85   29.20 
  12  -1  -3  516.95   31.10 
 -12  -1   3  493.65   25.00 
  12   1  -3  535.05   30.30 
 -12   1   3  539.95   30.30 
  12   1  -3  516.05   28.00 
 -12   1   3  529.25   27.70 
  11  -1  -3   35.60    8.70 
 -11  -1   3   47.90    8.70 
  11  -1  -3   41.30    9.60 
 -11  -1   3   48.20    8.70 
 -11  -1   3   33.80    8.60 
  11   1  -3   41.20    8.70 
 -11   1   3   26.10    7.60 
  11   1  -3   35.60    9.30 
 -11   1   3   40.80    8.60 
  10  -1  -3  350.76   21.90 
 -10  -1   3  369.66   21.10 
  10  -1  -3  391.26   24.30 
 -10  -1   3  366.96   23.30 
 -10   1   3  335.87   20.10 
  10   1  -3  382.06   23.30 
 -10   1   3  375.76   21.20 
  -9  -1   3  596.54   24.80 
  -9  -1   3  573.14   26.90 
  -9  -1   3  568.44   23.50 
   9  -1  -3  570.34   32.70 
   9  -1  -3  604.34   29.20 
   9   1  -3  629.94   26.40 
   9   1  -3  633.34   28.70 
  -9   1   3  568.84   30.80 
  -9   1   3  612.34   29.40 
  -8  -1   3   19.20    5.40 
   8  -1  -3   19.40    5.30 
   8  -1  -3   11.00    4.10 
  -8  -1   3   14.70    4.10 
  -8  -1   3   14.60    3.90 
   8   1  -3   11.10    4.00 
   8   1  -3    8.40    4.20 
  -8   1   3    9.00    4.00 
  -8   1   3    7.90    3.90 
  -7  -1   3  325.07   15.50 
   7  -1  -3  316.47   18.90 
  -7  -1   3  314.27   17.30 
   7  -1  -3  326.17   17.30 
  -7   1   3  347.97   17.10 
  -7   1   3  315.67   18.40 
   7   1  -3  331.17   18.30 
   7   1  -3  348.97   16.50 
   6  -1  -3  340.87   18.20 
  -6  -1   3  324.07   16.40 
   6  -1  -3  300.37   15.50 
  -6  -1   3  320.37   14.00 
   6   1  -3  326.47   16.90 
  -6   1   3  318.17   15.10 
   6   1  -3  341.57   14.90 
  -6   1   3  314.87   17.30 
   5  -1  -3  398.66   16.60 
  -5  -1   3  441.26   17.90 
   5  -1  -3  435.46   19.40 
  -5   1   3  417.66   18.60 
   5   1  -3  422.06   18.10 
   5   1  -3  415.76   15.20 
  -5   1   3  412.06   16.10 
   4  -1  -3  157.48    9.00 
   4  -1  -3  149.39   10.20 
  -4  -1   3  150.88    7.30 
  -4  -1   3  155.28    9.50 
  -4   1   3  145.19    8.30 
  -4   1   3  162.38   10.20 
   4   1  -3  133.49    9.10 
   4   1  -3  150.28    7.60 
   3  -1  -3  363.86   12.80 
  -3  -1   3  377.36   16.30 
   3  -1  -3  378.96   15.20 
  -3  -1   3  400.96   10.60 
  -3   1   3  369.46   14.60 
   3   1  -3  378.56   10.90 
  -3   1   3  375.26   12.50 
   3   1  -3  357.16   13.80 
   2  -1  -3  313.57   12.30 
  -2  -1   3  323.77    8.10 
   2  -1  -3  304.07   10.40 
  -2  -1   3  332.47   11.30 
  -2   1   3  335.67   10.40 
   2   1  -3  321.47    8.40 
  -2   1   3  329.57   12.30 
   2   1  -3  310.77   11.40 
   1  -1  -3   13.60    2.50 
  -1  -1   3   14.80    1.50 
  -1  -1   3   14.90    2.00 
   1  -1  -3   12.10    2.10 
   1   1  -3   15.90    2.20 
   1   1  -3   13.40    1.50 
  -1   1   3   17.00    2.00 
  -1   1   3   17.90    2.40 
   0  -1   3 1600.14   28.50 
   0  -1  -3 1585.94   29.00 
   0  -1  -3 1519.95   28.90 
   0  -1   3 1569.24   28.50 
   0   1  -3 1544.55   28.50 
   0   1   3 1576.34   28.50 
   0   1   3 1585.94   29.10 
  -1  -1  -3 1145.29   21.50 
   1  -1   3 1130.09   24.30 
   1  -1   3 1116.99   22.60 
  -1   1  -3 1124.09   22.50 
   1   1   3 1137.09   21.30 
  -1   1  -3 1110.99   24.00 
  -2  -1  -3   65.39    4.00 
   2  -1   3   58.79    5.10 
   2  -1   3   55.29    5.30 
  -2  -1  -3   54.89    4.70 
  -2   1  -3   63.69    4.50 
  -2   1  -3   56.49    5.50 
   2   1   3   55.29    4.90 
   2   1   3   56.59    3.80 
  -2   1  -3   61.69    5.20 
   3  -1   3  850.61   22.10 
  -3  -1  -3  868.91   19.60 
  -3  -1  -3  855.91   23.00 
   3   1   3  865.81   23.50 
  -3   1  -3  872.21   26.40 
   3   1   3  852.21   20.40 
  -3   1  -3  826.82   23.60 
  -3   1  -3  862.11   21.40 
  -4  -1  -3 1538.15   35.10 
   4  -1   3 1552.44   35.80 
   4  -1   3 1491.55   37.80 
  -4  -1  -3 1548.45   39.50 
  -4  -1  -3 1549.54   31.90 
  -4  -1  -3 1526.35   36.00 
   4   1   3 1504.55   36.50 
  -4   1  -3 1555.84   37.40 
  -4   1  -3 1527.65   33.90 
   4   1   3 1549.54   33.50 
  -4   1  -3 1507.65   40.10 
  -4   1  -3 1518.45   37.40 
  -5  -1  -3   39.00    5.30 
  -5  -1  -3   37.40    4.40 
   5  -1   3   42.20    7.70 
  -5  -1  -3   38.20    5.30 
  -5  -1  -3   40.30    7.30 
   5  -1   3   37.30    5.30 
   5   1   3   33.90    4.70 
  -5   1  -3   34.90    6.20 
  -5   1  -3   34.00    4.80 
   5   1   3   31.20    5.80 
  -5   1  -3   37.80    6.80 
  -5   1  -3   32.70    6.70 
   6  -1   3 1889.51   46.80 
  -6  -1  -3 1898.11   50.39 
  -6  -1  -3 1853.41   45.80 
  -6  -1  -3 1913.01   41.40 
  -6  -1  -3 1877.11   45.70 
  -6   1  -3 1822.12   42.90 
  -6   1  -3 1854.11   47.00 
  -6   1  -3 1833.62   48.00 
   6   1   3 1835.82   47.00 
  -6   1  -3 1797.82   50.29 
  -7  -1  -3  397.86   22.50 
  -7  -1  -3  383.06   16.60 
  -7  -1  -3  405.26   19.60 
  -7  -1  -3  396.76   19.70 
  -7   1  -3  399.96   21.00 
  -7   1  -3  382.56   17.80 
  -7   1  -3  396.86   22.00 
  -7   1  -3  369.06   19.60 
  -8  -1  -3  215.58   17.10 
  -8  -1  -3  210.28   12.90 
  -8  -1  -3  214.78   15.20 
  -8  -1  -3  226.38   15.40 
  -8   1  -3  221.58   16.20 
  -8   1  -3  202.18   13.50 
  -8   1  -3  221.58   17.20 
  -8   1  -3  228.08   16.00 
  -9  -1  -3  591.74   23.70 
  -9  -1  -3  586.24   26.80 
  -9  -1  -3  645.14   28.70 
  -9   1  -3  607.14   25.50 
  -9   1  -3  616.94   30.30 
  -9   1  -3  644.34   29.10 
 -10  -1  -3   80.59    8.80 
 -10  -1  -3   87.19   10.90 
 -10  -1  -3   90.09   19.00 
 -10   1  -3   88.79   11.10 
 -10   1  -3   91.99    9.90 
 -11  -1  -3    7.50    5.20 
 -11  -1  -3    4.90    4.30 
 -11   1  -3   14.60    5.50 
 -11   1  -3   12.20    5.90 
 -12  -1  -3  194.88   17.50 
 -12  -1  -3  196.08   15.60 
 -12   1  -3  216.68   19.20 
 -12   1  -3  210.68   16.90 
 -13  -1  -3  113.69   14.50 
 -13  -1  -3  112.29   12.30 
 -13   1  -3  122.89   15.50 
 -13   1  -3  126.49   15.20 
 -14  -1  -3   45.90    9.20 
 -14  -1  -3   52.09   11.40 
 -14   1  -3   52.39   11.50 
 -14   1  -3   44.00   10.50 
 -15  -1  -3   26.70    7.70 
 -15  -1  -3   28.40    8.70 
 -15   1  -3   29.50    8.20 
 -15   1  -3   20.00    7.50 
 -16  -2   3   17.70    6.70 
 -16  -2   3    8.70    6.30 
 -16   2   3   20.90    7.80 
 -16   2   3   20.60    8.10 
 -15  -2   3    3.00    5.20 
  15  -2  -3   -1.60    5.70 
  15  -2  -3   12.20    6.30 
 -15  -2   3    1.20    5.50 
 -15   2   3    5.70    5.40 
  15   2  -3    7.30    5.30 
 -15   2   3    6.10    4.80 
  14  -2  -3    7.60    5.20 
 -14  -2   3   17.50    6.50 
  14  -2  -3   17.50    8.20 
 -14  -2   3    6.30    5.10 
 -14   2   3    4.00    4.90 
 -14   2   3   13.90    6.10 
 -13  -2   3  179.78   17.00 
  13  -2  -3  166.88   18.50 
 -13  -2   3  143.39   13.60 
  13  -2  -3  155.38   17.30 
 -13   2   3  180.58   18.20 
 -13   2   3  185.08   17.70 
  13   2  -3  198.78   18.30 
  12  -2  -3   72.69   14.30 
 -12  -2   3   62.59   11.80 
  12  -2  -3   76.09   14.40 
 -12  -2   3   68.99    9.30 
 -12   2   3   62.19   11.80 
 -12   2   3   69.69   12.30 
  12   2  -3   85.79   14.10 
 -11  -2   3  144.69   14.00 
 -11  -2   3  154.68   13.60 
  11  -2  -3  132.19   14.60 
  11  -2  -3  149.49   15.90 
 -11  -2   3  153.58   12.20 
 -11   2   3  169.38   15.10 
 -11   2   3  185.08   17.20 
  11   2  -3  185.48   16.30 
 -10  -2   3    0.60    2.00 
  10  -2  -3    3.20    3.00 
 -10  -2   3    6.80    3.70 
  10  -2  -3    5.00    3.30 
 -10  -2   3    2.20    3.30 
 -10   2   3    3.50    3.00 
  10   2  -3    6.40    3.40 
  10   2  -3    3.80    2.70 
   9  -2  -3    7.90    4.00 
  -9  -2   3    8.30    3.50 
  -9  -2   3   11.10    3.60 
   9  -2  -3   10.80    4.50 
   9   2  -3    5.90    3.50 
  -9   2   3    5.10    3.30 
   9   2  -3    8.80    3.80 
  -8  -2   3  158.88   10.60 
  -8  -2   3  160.68   12.50 
   8  -2  -3  153.38   13.10 
  -8  -2   3  152.88   10.70 
   8  -2  -3  149.39   13.60 
   8   2  -3  155.98   11.40 
  -8   2   3  148.49   12.30 
   8   2  -3  138.99   12.10 
  -8   2   3  143.69   13.40 
  -7  -2   3  705.53   22.40 
   7  -2  -3  720.13   29.90 
  -7  -2   3  728.63   26.70 
  -7  -2   3  719.13   23.30 
   7  -2  -3  724.23   27.70 
   7   2  -3  744.03   24.30 
  -7   2   3  704.83   30.00 
   7   2  -3  748.53   27.80 
  -7   2   3  708.83   26.30 
  -6  -2   3   19.90    4.30 
  -6  -2   3   24.00    4.30 
   6  -2  -3   25.40    5.70 
   6  -2  -3   19.70    5.00 
   6   2  -3   22.00    5.10 
  -6   2   3   27.80    5.70 
  -6   2   3   26.10    5.80 
   6   2  -3   23.20    4.50 
   5  -2  -3  876.91   27.20 
   5  -2  -3  859.51   29.30 
  -5  -2   3  881.01   26.00 
  -5  -2   3  884.61   21.70 
  -5   2   3  869.71   26.10 
  -5   2   3  866.41   29.00 
   5   2  -3  882.51   26.90 
   5   2  -3  862.11   22.20 
   4  -2  -3  501.45   20.10 
  -4  -2   3  513.35   17.20 
  -4  -2   3  508.35   13.30 
   4  -2  -3  504.35   18.20 
  -4   2   3  515.15   19.90 
   4   2  -3  462.55   15.70 
   4   2  -3  519.55   18.10 
  -4   2   3  520.85   17.60 
  -3  -2   3   24.50    2.00 
  -3  -2   3   29.20    5.20 
   3  -2  -3   20.70    4.10 
   3  -2  -3   24.20    4.00 
  -3   2   3   33.00    5.40 
   3   2  -3   21.70    3.70 
   3   2  -3   26.70    2.30 
  -3   2   3   24.80    4.00 
  -2  -2   3 1453.05   23.00 
   2  -2  -3 1463.55   30.20 
  -2  -2   3 1403.96   28.50 
  -2   2   3 1466.05   29.60 
   2   2  -3 1447.36   23.30 
   2   2  -3 1416.06   29.40 
   1  -2  -3 1056.09   24.40 
  -1  -2   3 1127.79   22.10 
   1  -2  -3 1061.49   23.10 
  -1  -2   3 1107.69   19.40 
  -1   2   3 1078.49   22.90 
   1   2  -3 1077.49   19.10 
  -1   2   3 1080.29   24.10 
   1   2  -3 1084.79   22.40 
   0  -2   3 3284.77   53.19 
   0  -2  -3 3328.67   54.79 
   0  -2  -3 3281.07   54.09 
   0  -2   3 3340.27   53.49 
   0   2   3 3314.57   53.49 
   0   2  -3 3297.47   55.19 
   0   2   3 3249.57   54.49 
   0   2  -3 3256.17   53.39 
   1  -2   3  217.48    8.20 
  -1  -2  -3  199.78    8.30 
   1  -2   3  194.48    8.60 
  -1   2  -3  192.68    8.40 
   1   2   3  196.18    8.20 
  -1   2  -3  199.78    7.70 
  -1   2  -3  196.98    9.40 
   1   2   3  203.98    6.60 
   2  -2   3  663.03   18.00 
   2  -2   3  680.83   19.90 
  -2  -2  -3  668.03   18.00 
  -2  -2  -3  691.43   14.70 
   2  -2   3  684.63   21.30 
  -2   2  -3  657.53   17.40 
   2   2   3  678.83   18.40 
  -2   2  -3  653.73   21.00 
   2   2   3  666.23   14.80 
  -2   2  -3  685.43   19.60 
   3  -2   3  308.77   12.60 
   3  -2   3  312.67   15.00 
  -3  -2  -3  302.17    9.50 
  -3  -2  -3  316.77   12.50 
  -3   2  -3  290.87   13.30 
   3   2   3  303.47   10.10 
  -3   2  -3  298.47   14.70 
   3   2   3  297.27   12.50 
  -3   2  -3  312.57   12.10 
  -4  -2  -3  712.73   21.20 
   4  -2   3  733.03   23.20 
   4  -2   3  751.82   26.50 
  -4  -2  -3  761.32   18.60 
  -4  -2  -3  755.92   22.50 
  -4   2  -3  713.13   24.40 
   4   2   3  756.42   23.10 
  -4   2  -3  712.13   23.80 
  -4   2  -3  734.63   21.80 
  -4   2  -3  723.23   26.10 
   4   2   3  768.62   20.10 
  -5  -2  -3 1977.60   49.20 
  -5  -2  -3 2051.09   45.50 
  -5  -2  -3 1971.50   43.90 
   5  -2   3 2081.29   52.09 
   5  -2   3 2036.90   47.00 
  -5  -2  -3 2030.60   39.90 
  -5   2  -3 2027.40   44.60 
   5   2   3 1954.50   45.80 
  -5   2  -3 1948.91   47.60 
  -5   2  -3 2006.40   49.30 
  -5   2  -3 2008.70   51.59 
   5   2   3 2025.10   42.50 
   6  -2   3   27.30    5.70 
  -6  -2  -3   30.30    4.00 
  -6  -2  -3   33.20    5.90 
  -6  -2  -3   30.10    6.60 
   6  -2   3   44.90    8.60 
  -6  -2  -3   26.10    5.30 
  -6   2  -3   30.90    6.80 
   6   2   3   30.40    6.10 
  -6   2  -3   31.40    5.90 
  -6   2  -3   32.80    6.80 
  -6   2  -3   33.90    7.00 
  -7  -2  -3  888.11   25.90 
  -7  -2  -3  849.61   29.30 
  -7  -2  -3  883.71   33.30 
  -7  -2  -3  855.11   29.20 
   7  -2   3  881.01   34.90 
  -7   2  -3  899.11   32.40 
  -7   2  -3  893.81   35.10 
  -7   2  -3  823.32   32.70 
   8  -2   3 1258.87   44.80 
  -8  -2  -3 1187.78   41.90 
  -8  -2  -3 1167.98   37.10 
  -8  -2  -3 1173.08   33.00 
  -8  -2  -3 1217.18   38.50 
  -8   2  -3 1236.78   45.50 
  -8   2  -3 1209.98   37.00 
  -8   2  -3 1217.48   42.30 
  -8   2  -3 1234.58   40.80 
  -9  -2  -3  184.58   15.20 
  -9  -2  -3  148.49   13.00 
  -9  -2  -3  163.98   13.90 
  -9   2  -3  171.48   13.40 
  -9   2  -3  204.78   16.00 
 -10  -2  -3  216.08   14.10 
 -10  -2  -3  195.88   15.80 
 -10  -2  -3  208.68   16.50 
 -10   2  -3  231.88   16.40 
 -10   2  -3  214.58   17.30 
 -11  -2  -3  488.15   26.10 
 -11  -2  -3  478.65   22.50 
 -11   2  -3  495.25   28.20 
 -11   2  -3  475.25   24.90 
 -12  -2  -3  165.78   13.80 
 -12  -2  -3  177.58   16.30 
 -12   2  -3  176.48   32.20 
 -12   2  -3  178.18   15.90 
 -13  -2  -3   82.29   13.50 
 -13  -2  -3   78.29   10.20 
 -13   2  -3   71.89   13.70 
 -13   2  -3   81.69   13.30 
 -14  -2  -3  361.86   25.50 
 -14   2  -3  336.07   23.30 
 -14   2  -3  356.86   26.20 
 -15  -2  -3   45.90   10.10 
 -15  -2  -3   48.40   10.10 
 -15   2  -3   43.80   10.30 
 -15   2  -3   51.39   11.80 
  15  -3  -3   47.50   13.10 
 -15  -3   3   58.69   11.00 
 -15  -3   3   54.79   11.20 
  15  -3  -3   29.60   11.00 
  15   3  -3   55.09   11.10 
 -15   3   3   63.09   14.10 
 -15   3   3   40.30   11.30 
 -14  -3   3  104.59   13.10 
  14  -3  -3   87.39   17.30 
 -14  -3   3  106.59   12.10 
  14  -3  -3  125.09   16.60 
  14   3  -3   85.19   15.40 
 -14   3   3  112.79   14.50 
 -14   3   3  108.99   14.80 
 -13  -3   3   64.49   11.70 
 -13  -3   3   61.79    8.60 
  13  -3  -3   68.39   13.30 
  13  -3  -3   38.70   10.60 
 -13   3   3   54.49   12.50 
 -13   3   3   92.29   12.30 
  13   3  -3   71.39   12.70 
  12  -3  -3  591.64   33.40 
  12  -3  -3  659.93   36.30 
 -12  -3   3  587.84   25.70 
 -12  -3   3  578.44   27.40 
 -12  -3   3  628.04   30.60 
 -12   3   3  569.64   32.30 
  12   3  -3  642.84   32.40 
 -12   3   3  646.84   32.70 
 -11  -3   3   -0.40    3.50 
 -11  -3   3    3.00    2.60 
  11  -3  -3    2.50    3.70 
 -11  -3   3   -2.60    3.70 
  11  -3  -3    0.30    3.60 
  11   3  -3    0.80    3.20 
 -11   3   3   -0.20    3.00 
  10  -3  -3   44.80   10.30 
 -10  -3   3   48.60    8.60 
  10  -3  -3   53.19   10.20 
 -10  -3   3   49.40    8.20 
 -10  -3   3   47.10    6.40 
 -10   3   3   39.30    9.60 
  10   3  -3   40.50    8.60 
  -9  -3   3  505.35   19.80 
  -9  -3   3  448.76   27.50 
   9  -3  -3  457.25   26.40 
  -9  -3   3  457.45   20.30 
   9  -3  -3  440.16   24.50 
   9   3  -3  420.06   27.20 
  -9   3   3  470.15   24.00 
   8  -3  -3   37.80    8.40 
  -8  -3   3   26.70    6.30 
  -8  -3   3   31.10    5.40 
   8   3  -3   36.60    7.40 
  -8   3   3   24.10    6.20 
  -8   3   3   26.40    7.00 
   8   3  -3   32.30    6.30 
  -7  -3   3  157.28    9.60 
   7  -3  -3  162.08   16.20 
  -7  -3   3  151.88    9.00 
  -7  -3   3  136.79   10.70 
   7  -3  -3  161.68   13.00 
  -7   3   3  153.58   13.40 
   7   3  -3  138.69   11.10 
  -7   3   3  148.69   11.80 
   7   3  -3  153.68    9.90 
  -6  -3   3   19.10    4.30 
   6  -3  -3   22.90    5.40 
  -6  -3   3   23.60    3.90 
  -6  -3   3   28.40    4.70 
   6  -3  -3   20.30    5.60 
   6   3  -3   19.20    4.60 
  -6   3   3   19.20    4.60 
  -6   3   3   20.20    5.40 
   6   3  -3   22.10    4.30 
   5  -3  -3  273.27   14.70 
  -5  -3   3  255.27    9.60 
  -5  -3   3  254.57    9.20 
  -5  -3   3  259.07   12.50 
   5  -3  -3  252.67   15.30 
  -5   3   3  272.37   15.60 
   5   3  -3  243.98    9.80 
   5   3  -3  275.17   13.50 
  -5   3   3  275.07   14.10 
  -4  -3   3  365.26    9.70 
  -4  -3   3  377.96   13.90 
   4  -3  -3  361.26   17.30 
   4  -3  -3  378.96   16.20 
   4   3  -3  367.86   14.50 
  -4   3   3  363.56   15.20 
  -4   3   3  356.66   16.80 
   4   3  -3  365.46   10.10 
   3  -3  -3  376.76   14.90 
   3  -3  -3  368.36   16.10 
  -3  -3   3  378.06   12.60 
   3   3  -3  383.06   13.40 
  -3   3   3  389.46   14.50 
  -3   3   3  384.56   16.10 
  -2  -3   3 1515.45   29.00 
   2  -3  -3 1476.95   32.30 
   2  -3  -3 1520.95   34.60 
   2   3  -3 1488.15   29.80 
  -2   3   3 1474.35   31.50 
  -2   3   3 1469.65   33.70 
  -1  -3   3   89.99    3.90 
   1  -3  -3   85.69    5.90 
   1  -3  -3   78.99    5.50 
  -1  -3   3   79.29    4.50 
   1   3  -3   81.69    3.60 
   1   3  -3   86.19    4.90 
  -1   3   3   77.79    5.30 
   1   3  -3   83.49    4.20 
  -1   3   3   87.69    5.80 
   0  -3   3    3.40    1.40 
   0  -3  -3    1.80    1.30 
   0  -3  -3    4.30    1.40 
   0  -3   3    5.30    1.70 
   0   3   3    4.40    1.40 
   0   3   3    4.50    1.50 
   0   3  -3    1.80    1.10 
   0   3  -3    3.60    1.50 
   0   3  -3    1.20    1.00 
   1  -3   3  506.35   16.50 
  -1  -3  -3  494.25   12.80 
  -1  -3  -3  505.35   14.70 
   1  -3   3  508.35   17.00 
  -1   3  -3  530.55   16.70 
  -1   3  -3  491.75   15.00 
   1   3   3  507.85   11.70 
  -1   3  -3  503.05   14.10 
  -2  -3  -3  245.68   10.20 
   2  -3   3  231.68   12.00 
   2  -3   3  246.98   10.60 
   2   3   3  242.48   10.20 
  -2   3  -3  231.78   12.00 
   2   3   3  246.08    7.20 
  -2   3  -3  228.38   10.90 
  -2   3  -3  246.28   10.10 
   3  -3   3  444.16   18.80 
   3  -3   3  436.76   16.20 
  -3  -3  -3  457.85   11.40 
  -3  -3  -3  447.26   15.20 
  -3   3  -3  447.36   15.50 
   3   3   3  446.66   15.70 
  -3   3  -3  459.15   17.50 
  -3   3  -3  426.66   18.40 
   3   3   3  449.56   12.00 
   4  -3   3  284.67   14.10 
  -4  -3  -3  283.97   12.80 
   4  -3   3  289.97   16.10 
  -4  -3  -3  290.57   11.50 
  -4  -3  -3  291.77    9.70 
  -4   3  -3  285.97   15.90 
   4   3   3  311.17   11.10 
   4   3   3  290.47   13.40 
  -4   3  -3  285.57   15.10 
  -4   3  -3  279.97   13.00 
   5  -3   3   62.19    7.00 
  -5  -3  -3   76.69    6.50 
  -5  -3  -3   65.89    5.00 
   5  -3   3   74.09    8.60 
  -5  -3  -3   62.49    6.40 
  -5  -3  -3   68.29    7.60 
  -5   3  -3   67.99    8.10 
  -5   3  -3   69.59    6.90 
  -5   3  -3   61.89    7.80 
   5   3   3   60.69    5.40 
   5   3   3   74.19    7.20 
  -5   3  -3   59.79    7.10 
   6  -3   3  137.49   12.60 
   6  -3   3  146.09   11.80 
  -6  -3  -3  142.79   11.90 
  -6  -3  -3  159.58   10.80 
  -6  -3  -3  162.18   10.40 
  -6  -3  -3  165.78    8.80 
   6   3   3  135.49   10.60 
  -6   3  -3  146.19   13.40 
  -6   3  -3  159.18   13.00 
  -6   3  -3  159.18   11.20 
  -6   3  -3  154.38   12.20 
  -7  -3  -3   23.80    5.20 
   7  -3   3   24.10    6.80 
  -7  -3  -3   22.50    5.20 
  -7  -3  -3   25.90    4.70 
  -7  -3  -3   29.40    6.90 
  -7   3  -3   20.70    5.90 
   7   3   3   19.10    4.60 
  -7   3  -3   14.70    5.90 
  -7   3  -3   24.10    6.10 
  -7   3  -3   22.00    5.40 
   8  -3   3  101.99   12.30 
  -8  -3  -3   86.49   10.80 
  -8  -3  -3  109.49   10.10 
  -8  -3  -3  116.09   10.20 
  -8  -3  -3  104.39    8.30 
  -8   3  -3  101.79   10.30 
  -8   3  -3  102.39   11.20 
  -8   3  -3   85.09   10.90 
  -9  -3  -3   -1.60    3.80 
  -9  -3  -3    5.80    3.10 
  -9  -3  -3    3.20    2.60 
   9  -3   3   -5.50    3.30 
  -9  -3  -3    3.00    1.90 
  -9   3  -3   -0.90    2.90 
  -9   3  -3    5.40    3.50 
 -10  -3  -3   29.30    5.90 
  10  -3   3   16.80    5.40 
 -10  -3  -3   13.70    5.60 
 -10  -3  -3   18.30    5.50 
 -10   3  -3   15.40    6.00 
 -10   3  -3   14.00    5.40 
 -11  -3  -3   -2.10    3.10 
 -11  -3  -3    5.70    3.30 
 -11   3  -3   -4.00    3.00 
 -11   3  -3    1.20    3.10 
 -12  -3  -3   60.39    8.30 
 -12  -3  -3   75.09   12.80 
 -12   3  -3   70.29   13.50 
 -12   3  -3   40.70   11.50 
 -13  -3  -3   60.49    8.50 
 -13   3  -3   56.79   11.80 
 -13   3  -3   56.49   12.40 
 -14  -3  -3   22.80    6.70 
 -14  -3  -3   12.00    5.90 
 -14   3  -3   18.30    6.50 
 -14   3  -3   12.10    6.30 
 -15   3  -3   25.60    8.20 
 -15   3  -3   22.70    8.10 
 -15  -4   3   10.70    5.20 
  15  -4  -3    0.90    6.70 
  15  -4  -3    2.60    6.20 
 -15  -4   3    4.70    4.70 
  15   4  -3    0.20    5.30 
 -15   4   3   15.30    7.10 
 -15   4   3    4.00    5.30 
  14  -4  -3  378.76   28.50 
 -14  -4   3  343.37   23.30 
 -14  -4   3  356.66   20.60 
  14  -4  -3  318.87   27.30 
 -14   4   3  308.47   25.30 
 -14   4   3  314.27   25.20 
  14   4  -3  420.96   26.90 
  13  -4  -3  379.86   28.60 
 -13  -4   3  425.76   21.80 
  13  -4  -3  397.06   33.00 
 -13  -4   3  397.06   24.30 
  13   4  -3  436.86   26.60 
 -13   4   3  424.46   28.80 
  12  -4  -3   24.60    7.90 
 -12  -4   3   38.50    6.90 
 -12  -4   3   35.40    7.60 
 -12  -4   3   23.00    7.30 
  12   4  -3   35.50    8.50 
 -12   4   3   39.60   12.90 
 -12   4   3   22.30    7.00 
  11  -4  -3  439.76   28.50 
 -11  -4   3  404.56   19.20 
  11  -4  -3  450.45   27.90 
 -11  -4   3  447.36   21.90 
  11   4  -3  413.66   24.00 
 -11   4   3  372.16   25.20 
  10  -4  -3  227.18   18.90 
 -10  -4   3  191.68   14.80 
 -10  -4   3  172.68   11.40 
 -10  -4   3  197.28   13.60 
  10  -4  -3  202.48   18.20 
  10   4  -3  234.28   16.60 
 -10   4   3  220.08   18.40 
  -9  -4   3  590.44   22.50 
  -9  -4   3  586.34   25.10 
  -9  -4   3  597.54   21.10 
   9  -4  -3  591.84   29.70 
   9  -4  -3  577.34   30.30 
   9   4  -3  576.84   26.10 
  -9   4   3  602.34   29.00 
  -8  -4   3  454.35   20.60 
   8  -4  -3  457.85   25.60 
  -8  -4   3  449.56   18.00 
   8  -4  -3  485.05   25.00 
  -8  -4   3  456.45   16.80 
  -8   4   3  424.96   26.60 
   8   4  -3  488.95   22.20 
  -8   4   3  473.05   23.40 
   7  -4  -3 1672.43   48.10 
  -7  -4   3 1665.23   34.80 
  -7  -4   3 1587.74   36.10 
  -7  -4   3 1579.04   40.50 
   7  -4  -3 1652.03   49.90 
   7   4  -3 1593.64   42.30 
  -7   4   3 1622.54   49.30 
  -7   4   3 1567.94   44.70 
   6  -4  -3  543.75   23.70 
   6  -4  -3  551.44   25.30 
  -6  -4   3  519.85   14.80 
  -6  -4   3  520.55   19.20 
  -6  -4   3  529.95   15.90 
  -6   4   3  492.85   21.80 
   6   4  -3  531.45   20.50 
  -6   4   3  525.15   24.60 
   5  -4  -3 1120.89   33.90 
  -5  -4   3 1100.79   24.20 
  -5  -4   3 1125.09   23.00 
   5  -4  -3 1159.48   36.30 
  -5  -4   3 1127.79   28.40 
  -5   4   3 1119.79   35.50 
   5   4  -3 1146.49   30.10 
  -5   4   3 1099.79   32.40 
   4  -4  -3  912.91   28.10 
  -4  -4   3  924.11   22.80 
   4  -4  -3  902.71   29.70 
  -4   4   3  901.71   29.40 
   4   4  -3  886.91   24.00 
  -4   4   3  899.91   26.80 
   3  -4  -3    1.00    1.30 
  -3  -4   3    4.00    1.50 
   3  -4  -3    3.30    2.00 
  -3   4   3    1.70    1.30 
  -3   4   3    4.50    2.20 
   3   4  -3    2.90    1.40 
   2  -4  -3 1081.39   27.30 
   2  -4  -3 1088.09   28.60 
  -2  -4   3 1099.69   22.50 
  -2   4   3 1086.79   28.20 
   2   4  -3 1065.69   23.50 
  -2   4   3 1073.59   26.50 
  -1  -4   3 1333.87   25.60 
  -1  -4   3 1325.57   24.90 
   1  -4  -3 1302.67   29.40 
   1  -4  -3 1320.07   30.00 
   1   4  -3 1299.47   23.70 
   1   4  -3 1298.37   25.90 
  -1   4   3 1291.57   28.80 
   1   4  -3 1330.67   24.60 
  -1   4   3 1306.57   29.30 
   0  -4  -3 3652.33   59.99 
   0  -4   3 3542.45   62.59 
   0  -4   3 3592.34   60.89 
   0  -4  -3 3555.24   61.29 
   0   4   3 3569.34   60.99 
   0   4  -3 3532.45   60.49 
   0   4  -3 3561.34   58.49 
   0   4  -3 3466.15   58.89 
   0   4   3 3531.55   58.79 
  -1  -4  -3 1000.00   23.50 
   1  -4   3  964.80   23.00 
   1  -4   3  967.40   25.50 
  -1  -4  -3  971.40   20.70 
  -1   4  -3  993.80   22.60 
   1   4   3  981.10   19.10 
   1   4   3  968.70   23.10 
  -1   4  -3  983.10   24.30 
  -2  -4  -3  132.39    5.10 
   2  -4   3  129.99    8.00 
  -2  -4  -3  135.29    7.60 
   2  -4   3  120.19    8.90 
  -2   4  -3  124.99    8.40 
   2   4   3  122.39    7.30 
  -2   4  -3  132.19    9.10 
   2   4   3  133.89    4.80 
  -2   4  -3  133.89    7.70 
   3  -4   3   75.59    6.80 
   3  -4   3   74.49    7.80 
  -3  -4  -3   82.29    6.20 
  -3   4  -3   76.59    7.60 
  -3   4  -3   69.19    6.10 
   3   4   3   62.79    5.60 
  -3   4  -3   77.69    7.20 
   3   4   3   68.49    3.90 
   4  -4   3  260.07   13.80 
   4  -4   3  259.87   15.60 
  -4  -4  -3  257.37   10.10 
  -4  -4  -3  259.47   12.10 
  -4  -4  -3  259.77    8.40 
  -4   4  -3  251.77   15.20 
  -4   4  -3  252.67   14.60 
  -4   4  -3  251.57   12.80 
   4   4   3  246.58    9.30 
   4   4   3  269.87   12.70 
  -5  -4  -3  958.40   21.30 
   5  -4   3  908.31   30.10 
  -5  -4  -3  952.50   27.00 
   5  -4   3  964.40   34.00 
   5   4   3  900.01   26.70 
  -5   4  -3  967.30   28.90 
   5   4   3  887.71   27.30 
  -5   4  -3  938.01   33.20 
  -5   4  -3  900.21   31.90 
  -5   4  -3  950.90   31.50 
  -6  -4  -3  416.56   16.60 
  -6  -4  -3  428.56   14.10 
  -6  -4  -3  420.86   17.90 
  -6  -4  -3  409.96   20.40 
   6   4   3  438.46   19.30 
  -6   4  -3  408.16   22.30 
  -6   4  -3  426.16   19.30 
  -6   4  -3  382.36   27.80 
  -6   4  -3  485.45   34.10 
   7  -4   3   35.10    8.60 
  -7  -4  -3   36.20    6.90 
  -7  -4  -3   40.90    6.60 
  -7  -4  -3   37.30    7.30 
  -7  -4  -3   32.80    4.30 
  -7   4  -3   38.80    8.40 
  -7   4  -3   39.00    7.10 
  -7   4  -3   48.00    9.70 
  -7   4  -3   22.10    5.70 
   7   4   3   40.50    7.20 
  -8  -4  -3  783.52   32.70 
  -8  -4  -3  797.62   27.90 
  -8  -4  -3  778.62   28.30 
  -8  -4  -3  784.02   23.60 
   8  -4   3  772.02   35.40 
  -8   4  -3  807.52   30.40 
   8   4   3  765.72   30.20 
  -8   4  -3  824.92   33.70 
  -9  -4  -3  620.04   22.20 
  -9  -4  -3  708.43   27.60 
   9  -4   3  710.03   35.30 
  -9  -4  -3  712.53   28.00 
  -9  -4  -3  701.73   31.80 
  -9   4  -3  690.13   32.10 
  -9   4  -3  661.53   28.70 
 -10  -4  -3   17.40    5.00 
 -10  -4  -3   27.50    6.40 
  10  -4   3   16.00    5.60 
 -10  -4  -3   31.00    6.30 
 -10   4  -3   27.50    8.10 
 -10   4  -3   33.10    7.70 
  11  -4   3  333.77   25.60 
 -11  -4  -3  361.36   21.20 
 -11  -4  -3  324.27   20.30 
 -11  -4  -3  320.77   17.00 
 -11   4  -3  320.57   23.10 
 -11   4  -3  307.77   20.80 
 -12  -4  -3   35.40    6.90 
 -12  -4  -3   30.90    8.40 
 -12   4  -3   35.80    9.20 
 -12   4  -3   26.50    8.50 
 -13  -4  -3   44.20    9.80 
 -13  -4  -3   27.00    6.60 
 -13   4  -3   22.20    7.90 
 -13   4  -3   35.80   10.40 
 -14  -4  -3  167.48   16.80 
 -14  -4  -3  161.38   13.90 
 -14   4  -3  150.58   16.80 
 -14   4  -3  190.78   19.20 
 -15  -4  -3    3.90    6.00 
 -15  -4  -3    0.70    5.10 
 -15   4  -3    9.50    6.20 
 -15   4  -3   18.00    6.10 
  15  -5  -3  107.29   18.60 
  15  -5  -3   98.29   18.10 
 -15  -5   3   98.09   11.10 
 -15  -5   3   85.49   16.00 
 -15   5   3   86.99   16.30 
 -15   5   3   93.19   16.30 
 -14  -5   3   -2.40    4.40 
  14  -5  -3    2.80    7.80 
  14  -5  -3    6.60    4.80 
 -14  -5   3   -2.40    3.50 
 -14   5   3   -6.00    4.00 
 -14   5   3   -2.00    4.60 
  14   5  -3   15.50    6.10 
  13  -5  -3    4.30    4.30 
 -13  -5   3    1.70    3.80 
 -13  -5   3    0.90    4.10 
  13  -5  -3    6.50    5.50 
 -13   5   3    1.80    4.00 
  13   5  -3    4.30    5.10 
 -13   5   3    5.70    4.70 
 -12  -5   3   62.89    8.90 
  12  -5  -3   87.59   16.40 
 -12  -5   3   74.09    7.90 
  12  -5  -3   79.29   14.30 
 -12  -5   3   67.39    9.40 
 -12   5   3   63.69   12.40 
  12   5  -3   61.19   11.40 
  11  -5  -3   25.20    7.90 
 -11  -5   3   24.10    5.90 
 -11  -5   3   25.30    6.20 
 -11  -5   3   20.50    5.00 
 -11  -5   3   24.80    6.00 
  11  -5  -3   24.70    7.40 
 -11   5   3   27.40    8.20 
  11   5  -3   16.30    6.00 
 -10  -5   3    4.80    3.20 
 -10  -5   3    8.30    3.50 
  10  -5  -3   -2.50    2.60 
  10  -5  -3   11.20    5.00 
 -10  -5   3    5.80    2.60 
 -10   5   3    5.80    5.30 
  10   5  -3    3.30    2.90 
  -9  -5   3   76.59    6.80 
  -9  -5   3   92.19    9.20 
  -9  -5   3   95.19    8.40 
   9  -5  -3  112.59   13.10 
   9  -5  -3   86.69   12.20 
   9   5  -3   94.49   10.00 
  -8  -5   3  737.93   21.20 
   8  -5  -3  762.92   33.00 
  -8  -5   3  733.03   22.90 
  -8  -5   3  724.93   25.70 
   8  -5  -3  777.02   34.70 
   8   5  -3  724.23   27.30 
  -8   5   3  753.92   31.00 
   7  -5  -3   16.50    5.50 
   7  -5  -3    3.80    3.50 
  -7  -5   3   14.10    3.80 
  -7  -5   3   10.10    2.50 
  -7   5   3   11.10    4.40 
   7   5  -3   13.10    3.80 
  -7   5   3   20.90    5.90 
   6  -5  -3 1144.29   42.70 
   6  -5  -3 1195.08   38.70 
  -6  -5   3 1250.07   24.50 
  -6  -5   3 1210.08   26.00 
  -6  -5   3 1208.28   30.70 
   6   5  -3 1211.48   32.70 
  -6   5   3 1210.48   37.10 
  -5  -5   3   24.70    2.10 
   5  -5  -3   30.00    6.10 
  -5  -5   3   24.30    2.50 
  -5  -5   3   23.70    4.10 
   5  -5  -3   19.90    5.50 
   5   5  -3   26.90    4.60 
  -5   5   3   31.40    7.00 
  -5   5   3   22.20    5.20 
   4  -5  -3   72.69    8.10 
   4  -5  -3   61.29    7.30 
  -4  -5   3   69.29    5.50 
  -4   5   3   70.99    7.20 
   4   5  -3   76.29    6.10 
  -4   5   3   80.49    8.20 
  -3  -5   3  922.71   20.70 
   3  -5  -3  958.10   29.30 
   3  -5  -3  917.71   27.70 
   3   5  -3  924.11   22.40 
  -3   5   3  936.31   28.70 
  -3   5   3  948.61   27.10 
   2  -5  -3  353.16   15.30 
  -2  -5   3  354.96   10.70 
   2  -5  -3  350.96   14.70 
  -2   5   3  351.46   14.20 
   2   5  -3  355.86   11.40 
  -2   5   3  343.37   14.90 
   1  -5  -3  248.08   11.50 
  -1  -5   3  265.27    9.20 
   1  -5  -3  260.67   11.70 
  -1  -5   3  272.07    9.30 
   1   5  -3  268.47    8.90 
  -1   5   3  256.27   11.30 
   1   5  -3  264.67    9.30 
   0  -5   3 3362.26   59.29 
   0  -5  -3 3405.66   58.19 
   0  -5   3 3336.97   56.99 
   0  -5  -3 3331.67   60.09 
   0   5  -3 3453.25   56.79 
   0   5   3 3336.77   57.09 
   0   5  -3 3317.57   58.59 
   0   5   3 3293.17   59.29 
   1  -5   3    0.80    1.50 
   1  -5   3    1.80    1.30 
  -1  -5  -3    1.50    1.10 
  -1  -5  -3    1.10    1.40 
   1   5   3    0.30    0.70 
  -1   5  -3    1.40    1.60 
   1   5   3    0.80    1.30 
  -1   5  -3    3.50    1.50 
   2  -5   3 1058.49   30.40 
  -2  -5  -3 1052.29   20.20 
   2  -5   3 1051.29   27.20 
  -2  -5  -3 1087.49   26.20 
   2   5   3 1076.49   18.90 
   2   5   3 1063.49   25.90 
  -2   5  -3 1073.39   26.40 
  -2   5  -3 1060.99   30.00 
   3  -5   3 1551.24   41.40 
   3  -5   3 1603.64   38.50 
  -3  -5  -3 1573.94   34.60 
  -3  -5  -3 1583.54   26.90 
  -3   5  -3 1542.65   40.90 
   3   5   3 1586.04   35.10 
  -3   5  -3 1607.24   36.70 
   3   5   3 1588.34   27.10 
   4  -5   3  881.91   31.10 
  -4  -5  -3  882.21   20.00 
  -4  -5  -3  895.41   17.50 
  -4  -5  -3  851.21   24.30 
   4  -5   3  836.42   27.60 
  -4   5  -3  867.51   30.60 
  -4   5  -3  815.62   29.20 
   4   5   3  917.51   25.50 
  -4   5  -3  863.51   26.40 
   4   5   3  874.51   19.00 
   5  -5   3  181.98   14.30 
  -5  -5  -3  190.78    9.00 
   5  -5   3  178.08   12.90 
  -5  -5  -3  184.08   10.80 
  -5  -5  -3  177.38    7.10 
  -5   5  -3  180.08   11.80 
   5   5   3  174.38   10.80 
  -5   5  -3  165.38   12.70 
  -5   5  -3  176.28   13.80 
  -5   5  -3  161.68   12.90 
  -6  -5  -3  176.28    8.00 
  -6  -5  -3  178.98   11.10 
   6  -5   3  174.98   13.50 
   6  -5   3  161.48   14.20 
  -6  -5  -3  188.38   10.10 
  -6   5  -3  177.98   12.50 
  -6   5  -3  157.88   13.20 
  -6   5  -3  173.18   14.10 
  -6   5  -3  176.18   14.50 
   6   5   3  171.18   11.70 
  -7  -5  -3  465.35   19.70 
  -7  -5  -3  447.36   22.40 
   7  -5   3  441.86   25.50 
  -7  -5  -3  474.25   15.30 
  -7  -5  -3  469.95   18.30 
  -7   5  -3  431.16   24.30 
  -7   5  -3  441.56   25.00 
  -7   5  -3  421.16   20.90 
  -7   5  -3  453.15   23.80 
   7   5   3  434.46   20.30 
  -8  -5  -3    6.70    2.90 
  -8  -5  -3    8.80    3.50 
   8  -5   3    6.80    4.50 
  -8  -5  -3    0.70    2.10 
  -8  -5  -3    8.40    4.20 
   8   5   3    5.20    3.30 
  -8   5  -3   11.60    5.00 
  -8   5  -3    0.50    2.50 
  -9  -5  -3  109.39    8.30 
  -9  -5  -3  153.58   12.20 
  -9  -5  -3  169.08   12.30 
   9  -5   3  161.78   16.90 
  -9  -5  -3  135.79   13.60 
  -9   5  -3  125.89   14.30 
  -9   5  -3  156.98   13.80 
 -10  -5  -3  268.87   16.80 
 -10  -5  -3  248.78   16.70 
  10  -5   3  233.68   21.10 
 -10  -5  -3  222.88   12.70 
 -10   5  -3  257.57   20.50 
 -10   5  -3  245.38   18.00 
  11  -5   3   31.60   11.30 
 -11  -5  -3   38.90    7.50 
 -11  -5  -3   34.40    6.40 
 -11  -5  -3   34.50    8.00 
 -11   5  -3   24.20    7.20 
 -11   5  -3   33.70   11.80 
 -12  -5  -3  399.36   23.40 
  12  -5   3  403.26   29.90 
 -12  -5  -3  378.86   18.80 
 -12   5  -3  401.56   25.30 
 -12   5  -3  432.06   28.50 
 -13  -5  -3  189.08   13.50 
 -13  -5  -3  196.28   17.10 
 -13   5  -3  175.48   17.60 
 -13   5  -3  167.38   18.50 
 -14  -5  -3   -2.30    3.80 
 -14  -5  -3   -2.40    4.00 
 -14   5  -3   -6.10    4.00 
 -14   5  -3    7.70    6.70 
 -15  -5  -3   25.20    6.60 
 -15  -5  -3   19.40    8.20 
 -15   5  -3   25.50    8.30 
  15  -6  -3    5.50    9.10 
  15  -6  -3    9.80    8.40 
 -15  -6   3   18.10    6.60 
 -15  -6   3   16.10    4.70 
 -15   6   3   13.40    6.50 
 -15   6   3   15.40    6.80 
 -14  -6   3  117.19   12.70 
  14  -6  -3   88.19   16.90 
 -14  -6   3   87.59    8.70 
  14  -6  -3   98.99   17.90 
 -14   6   3   84.29   16.30 
  14   6  -3   90.99   14.40 
 -14   6   3   72.49   15.40 
 -13  -6   3   65.09    9.20 
  13  -6  -3   48.20   12.90 
 -13  -6   3   43.50    7.60 
 -13  -6   3   63.89    9.80 
  13  -6  -3   36.70   10.80 
 -13   6   3   48.10   11.70 
  13   6  -3   51.19    9.60 
 -13   6   3   42.10   11.00 
  12  -6  -3   27.30    9.50 
 -12  -6   3   29.30    8.10 
 -12  -6   3   22.00    6.60 
 -12  -6   3   28.30    6.60 
  12  -6  -3   13.00    6.30 
 -12   6   3   27.60    7.90 
  12   6  -3   24.70    7.40 
 -11  -6   3   37.10    4.90 
  11  -6  -3   26.80    8.50 
  11  -6  -3   38.40   10.70 
 -11  -6   3   43.40    7.70 
 -11  -6   3   31.40    6.90 
 -11  -6   3   41.90    6.90 
  11   6  -3   34.30    7.90 
 -11   6   3   40.90   11.00 
 -10  -6   3   15.30    3.60 
  10  -6  -3   12.20    6.20 
  10  -6  -3    9.20    5.30 
 -10  -6   3   19.80    4.50 
 -10  -6   3   12.40    5.80 
 -10   6   3   13.00    6.50 
  10   6  -3   10.10    3.70 
   9  -6  -3   90.09   14.90 
  -9  -6   3   83.19    6.60 
  -9  -6   3   90.79    7.90 
  -9  -6   3  109.69    9.30 
   9  -6  -3   89.79   15.00 
  -9   6   3  102.99   12.80 
   9   6  -3   86.89    9.60 
  -8  -6   3  271.77   12.60 
  -8  -6   3  278.67   11.20 
  -8  -6   3  265.87   14.30 
   8  -6  -3  266.67   19.60 
   8  -6  -3  285.47   20.60 
  -8   6   3  245.38   28.60 
   8   6  -3  263.37   15.30 
  -7  -6   3  175.68   10.40 
   7  -6  -3  169.58   15.20 
  -7  -6   3  182.88    7.80 
   7  -6  -3  177.08   14.90 
  -7  -6   3  159.78    8.50 
  -7   6   3  170.58   13.80 
   7   6  -3  163.18   11.10 
  -7   6   3  160.38   14.60 
  -6  -6   3   14.20    2.50 
   6  -6  -3   18.90    5.60 
  -6  -6   3   20.00    4.00 
   6  -6  -3   27.30    6.80 
   6   6  -3   11.60    3.80 
  -6   6   3   21.30    5.90 
   5  -6  -3   37.20    7.40 
   5  -6  -3   51.39    9.00 
  -5  -6   3   40.40    4.20 
  -5   6   3   38.70    6.80 
  -5   6   3   55.89    9.50 
   5   6  -3   33.20    4.60 
   4  -6  -3 2306.37   55.49 
   4  -6  -3 2291.17   53.99 
  -4   6   3 2199.28   51.19 
   4   6  -3 2289.77   44.40 
  -4   6   3 2245.08   54.59 
   3  -6  -3   13.40    4.20 
  -3  -6   3   17.60    2.90 
   3  -6  -3   18.80    4.70 
  -3   6   3   20.50    5.10 
   3   6  -3   19.90    3.40 
  -3   6   3   15.50    4.10 
  -2  -6   3  740.93   15.90 
  -2  -6   3  734.23   17.30 
   2  -6  -3  754.72   24.30 
   2  -6  -3  747.23   24.00 
   2   6  -3  746.43   18.20 
  -2   6   3  722.83   22.60 
   2   6  -3  724.43   14.80 
  -2   6   3  729.23   23.70 
   1  -6  -3  483.15   17.60 
   1  -6  -3  474.95   17.10 
  -1  -6   3  481.15   14.20 
  -1  -6   3  501.75   14.40 
   1   6  -3  475.95   13.60 
  -1   6   3  506.25   17.40 
   1   6  -3  468.65   13.50 
  -1   6   3  478.05   16.70 
   0  -6   3 2126.29   42.70 
   0  -6  -3 2110.99   41.20 
   0  -6  -3 2086.39   43.30 
   0  -6   3 2068.09   40.20 
   0   6   3 2136.79   40.50 
   0   6   3 2094.49   42.70 
   0   6  -3 2107.19   39.40 
   0   6  -3 2120.29   41.90 
   1  -6   3  103.89    7.10 
  -1  -6  -3   89.79    6.70 
   1  -6   3   98.49    7.80 
  -1  -6  -3   98.89    6.70 
   1   6   3   96.89    6.80 
  -1   6  -3   93.79    6.40 
   1   6   3   89.59    4.80 
  -1   6  -3   90.79    7.30 
   2  -6   3 2121.69   48.60 
   2  -6   3 2028.80   44.20 
  -2  -6  -3 2064.39   42.40 
  -2  -6  -3 2090.69   35.20 
  -2   6  -3 2099.39   43.20 
   2   6   3 2115.09   33.20 
  -2   6  -3 2065.29   47.50 
   2   6   3 2058.19   42.10 
   3  -6   3  515.35   20.00 
  -3  -6  -3  524.75   17.70 
   3  -6   3  505.65   22.10 
  -3  -6  -3  531.35   11.30 
   3   6   3  524.55   10.80 
  -3   6  -3  527.95   18.90 
   3   6   3  509.75   17.40 
  -3   6  -3  542.45   21.90 
  -3   6  -3  521.95   21.90 
  -4  -6  -3   11.80    1.70 
   4  -6   3    7.10    2.50 
  -4  -6  -3   10.20    2.00 
   4  -6   3    7.10    3.30 
  -4  -6  -3    9.30    2.90 
  -4   6  -3   10.40    3.60 
  -4   6  -3    9.50    4.00 
   4   6   3   10.50    1.80 
  -4   6  -3    4.80    2.30 
   4   6   3    6.30    2.60 
   5  -6   3   43.50    9.10 
  -5  -6  -3   37.00    5.00 
  -5  -6  -3   39.50    3.00 
  -5  -6  -3   34.90    3.50 
   5  -6   3   33.90    8.00 
  -5   6  -3   29.80    5.70 
  -5   6  -3   45.20   10.30 
  -5   6  -3   31.60    8.40 
   5   6   3   35.90    5.00 
  -6  -6  -3  113.89    7.00 
  -6  -6  -3  113.19    5.70 
   6  -6   3  107.59   10.70 
  -6  -6  -3  106.59    8.50 
   6  -6   3   97.69   11.40 
  -6   6  -3  102.39   10.80 
  -6   6  -3  112.59   10.10 
   6   6   3  109.89    9.10 
  -6   6  -3   93.19   10.90 
  -6   6  -3  124.79   11.80 
  -7  -6  -3   72.29    8.90 
   7  -6   3   67.69   12.60 
  -7  -6  -3   61.49    6.00 
  -7  -6  -3   74.99    7.70 
  -7  -6  -3   80.79    5.60 
  -7   6  -3   59.29   10.60 
  -7   6  -3   86.99    9.60 
   7   6   3   60.49    7.60 
  -8  -6  -3    3.40    3.00 
  -8  -6  -3    6.10    3.70 
   8  -6   3   -2.40    2.80 
  -8  -6  -3    5.60    3.00 
  -8  -6  -3    4.80    2.30 
  -8   6  -3    1.10    3.00 
   8   6   3    3.40    2.90 
  -8   6  -3    1.90    2.70 
  -9  -6  -3    3.40    3.40 
   9  -6   3    4.40    4.90 
  -9  -6  -3    1.40    2.60 
  -9  -6  -3    3.30    1.90 
  -9  -6  -3    3.20    2.20 
  -9   6  -3    6.90    3.70 
   9   6   3    8.60    4.30 
 -10  -6  -3  106.89   10.50 
 -10  -6  -3  122.29   10.70 
 -10  -6  -3  103.59    8.10 
  10  -6   3  118.69   15.10 
 -10   6  -3  115.29   14.20 
 -10   6  -3   93.39   11.30 
  11  -6   3  114.39   15.40 
 -11  -6  -3  114.69   11.50 
 -11   6  -3  137.39   27.00 
 -11   6  -3  104.49   14.60 
 -12  -6  -3   41.30    7.70 
  12  -6   3   32.80    9.40 
 -12  -6  -3   46.40    7.60 
 -12  -6  -3   41.20    8.20 
 -12   6  -3   43.80   11.70 
 -12   6  -3   34.30    8.80 
 -13  -6  -3   50.19    7.00 
  13  -6   3   72.19   15.20 
 -13  -6  -3   45.00    8.80 
 -13   6  -3   34.40    9.60 
 -13   6  -3   43.30   10.60 
 -14  -6  -3   56.09   10.30 
 -14  -6  -3   61.09    8.00 
 -14   6  -3   38.40   10.70 
 -14   6  -3   48.40   10.80 
 -15  -6  -3   20.10    5.50 
 -15   6  -3   16.50   10.60 
 -15   6  -3   14.60    7.50 
 -15  -7   3  163.88   14.90 
  15  -7  -3  147.69   31.40 
  15  -7  -3  165.78   22.10 
 -15  -7   3  130.09   11.60 
 -15   7   3  113.69   22.70 
 -15   7   3  128.09   17.60 
 -14  -7   3   31.60    7.40 
  14  -7  -3   38.60   12.10 
 -14  -7   3   34.70    5.90 
  14  -7  -3   32.80   11.10 
  14   7  -3   16.40    7.20 
 -14   7   3   28.60    8.90 
 -14   7   3   31.50    8.10 
 -13  -7   3   92.99    8.20 
  13  -7  -3   69.29   14.70 
 -13  -7   3   87.59   10.50 
 -13  -7   3   74.39    9.70 
  13  -7  -3   78.39   15.30 
  13   7  -3   86.69   13.30 
 -13   7   3   93.49   16.50 
 -12  -7   3  322.47   17.70 
 -12  -7   3  323.27   19.20 
  12  -7  -3  354.96   27.50 
 -12  -7   3  330.57   15.70 
  12  -7  -3  320.97   26.10 
 -12  -7   3  322.47   18.90 
  12   7  -3  313.37   19.90 
 -12   7   3  300.17   24.20 
  11  -7  -3  190.18   22.60 
 -11  -7   3  188.48   14.00 
  11  -7  -3  195.58   19.30 
 -11  -7   3  219.78   14.60 
 -11  -7   3  155.58   10.00 
 -11  -7   3  180.18   12.40 
 -11   7   3  212.68   21.30 
  11   7  -3  179.38   14.60 
 -10  -7   3   49.50    7.60 
 -10  -7   3   39.40    6.50 
 -10  -7   3   30.80    4.20 
  10  -7  -3   50.89   11.10 
  10  -7  -3   20.60    8.50 
 -10   7   3   41.90   10.30 
  10   7  -3   40.60    7.50 
  -9  -7   3  967.70   29.50 
   9  -7  -3  960.00   41.20 
   9  -7  -3  965.80   42.10 
  -9  -7   3  771.62   22.30 
  -9  -7   3  940.71   26.70 
  -9   7   3  945.41   40.00 
   9   7  -3  932.01   31.40 
  -8  -7   3 1642.34   46.60 
  -8  -7   3 1526.15   31.50 
   8  -7  -3 1570.84   53.39 
  -8  -7   3 1583.34   38.30 
   8  -7  -3 1520.85   51.99 
   8   7  -3 1522.05   40.70 
  -7  -7   3    5.10    1.50 
   7  -7  -3    3.90    3.20 
  -7  -7   3    4.20    2.30 
   7  -7  -3    8.20    3.80 
  -7  -7   3    3.60    2.10 
   7   7  -3    2.10    2.30 
  -7   7   3    0.60    2.90 
  -6  -7   3  792.42   17.80 
   6  -7  -3  793.12   32.20 
   6  -7  -3  781.62   32.80 
  -6  -7   3  792.12   21.40 
  -6   7   3  774.72   32.50 
  -6   7   3  756.62   29.80 
   6   7  -3  791.72   24.00 
   5  -7  -3 1439.26   43.70 
  -5  -7   3 1522.25   30.90 
   5  -7  -3 1476.45   44.90 
  -5   7   3 1487.95   42.30 
   5   7  -3 1509.15   34.20 
  -5   7   3 1443.86   44.70 
   4  -7  -3   20.00    5.40 
   4  -7  -3   17.40    5.30 
  -4   7   3   25.30    5.80 
  -4   7   3   22.20    5.40 
   4   7  -3   28.70    3.80 
   3  -7  -3 3129.29   65.99 
   3  -7  -3 3062.89   64.99 
  -3  -7   3 2956.10   53.89 
  -3   7   3 2985.80   64.59 
  -3   7   3 3006.20   62.79 
   3   7  -3 3034.90   53.19 
  -2  -7   3 1626.24   35.80 
   2  -7  -3 1728.63   42.10 
  -2  -7   3 1672.03   35.30 
   2  -7  -3 1734.63   42.00 
   2   7  -3 1759.52   30.70 
  -2   7   3 1715.73   41.50 
  -2   7   3 1705.33   40.30 
   2   7  -3 1741.53   33.30 
   1  -7  -3  345.67   14.70 
   1  -7  -3  344.07   15.40 
  -1  -7   3  325.47   12.10 
  -1  -7   3  350.26   11.80 
  -1   7   3  309.17   14.00 
   1   7  -3  306.57   11.20 
  -1   7   3  323.87   14.10 
   1   7  -3  334.67   11.20 
   0  -7   3 1805.32   36.90 
   0  -7  -3 1816.72   37.60 
   0  -7  -3 1835.52   40.50 
   0  -7   3 1742.73   38.90 
   0   7   3 1816.62   36.80 
   0   7   3 1749.62   39.00 
   0   7  -3 1732.23   37.90 
   0   7  -3 1791.02   35.60 
   1  -7   3  661.73   22.70 
   1  -7   3  693.13   20.90 
  -1  -7  -3  658.13   17.20 
  -1  -7  -3  692.73   21.10 
  -1   7  -3  632.54   21.60 
  -1   7  -3  682.33   19.70 
   1   7   3  665.53   20.30 
   1   7   3  668.63   16.30 
   2  -7   3   11.20    3.30 
   2  -7   3   14.10    4.10 
  -2  -7  -3   15.60    2.30 
  -2  -7  -3   13.80    3.40 
  -2   7  -3    8.20    3.30 
   2   7   3   14.20    1.60 
  -2   7  -3   18.60    4.00 
   2   7   3   18.40    3.80 
  -3  -7  -3  329.67   13.90 
   3  -7   3  341.67   18.30 
   3  -7   3  330.87   16.20 
  -3   7  -3  326.27   15.00 
  -3   7  -3  350.76   17.90 
  -3   7  -3  332.67   17.40 
   3   7   3  317.17   13.60 
   4  -7   3  525.65   22.30 
   4  -7   3  530.75   24.50 
  -4  -7  -3  510.85   18.40 
  -4   7  -3  513.05   23.60 
  -4   7  -3  533.35   21.00 
   4   7   3  501.45   18.50 
  -4   7  -3  499.25   23.30 
   5  -7   3  250.47   16.00 
   5  -7   3  270.07   18.30 
  -5  -7  -3  258.17   12.90 
  -5   7  -3  235.38   16.50 
   5   7   3  244.98   13.20 
  -5   7  -3  255.77   15.00 
  -5   7  -3  252.47   17.00 
  -6  -7  -3  133.79    7.00 
  -6  -7  -3  120.59    9.30 
  -6  -7  -3  140.39    5.60 
   6  -7   3  126.79   13.30 
   6  -7   3  125.99   12.00 
   6   7   3  128.89   10.10 
  -6   7  -3  119.39   12.50 
  -6   7  -3  148.09   11.80 
  -6   7  -3  143.69   13.30 
  -7  -7  -3  708.83   25.10 
  -7  -7  -3  674.23   16.70 
   7  -7   3  696.53   33.90 
  -7   7  -3  707.83   28.70 
   7   7   3  695.93   26.10 
  -7   7  -3  763.82   33.10 
  -8  -7  -3   77.49    9.60 
  -8  -7  -3  109.59    8.00 
   8  -7   3  112.49   13.70 
  -8  -7  -3   92.19    6.00 
  -8  -7  -3   85.19    8.70 
  -8   7  -3   87.39   10.20 
  -8   7  -3   98.69   12.20 
   8   7   3   88.79    9.50 
  -9  -7  -3  214.38   16.70 
  -9  -7  -3  213.18   14.20 
  -9  -7  -3  179.28    9.30 
  -9  -7  -3  203.98   12.30 
   9  -7   3  216.48   20.70 
  -9   7  -3  233.98   17.50 
   9   7   3  176.88   14.20 
  -9   7  -3  196.28   17.80 
 -10  -7  -3  197.18   14.50 
 -10  -7  -3  177.88   10.00 
 -10  -7  -3  226.58   13.70 
  10  -7   3  260.77   22.70 
 -10   7  -3  216.88   17.80 
 -10   7  -3  229.28   20.40 
 -11  -7  -3    1.90    2.70 
  11  -7   3    5.50    4.40 
 -11  -7  -3   -0.40    2.20 
 -11  -7  -3    7.50    3.10 
 -11   7  -3    1.30    3.30 
 -11   7  -3   -2.20    3.30 
 -12  -7  -3  267.97   14.10 
  12  -7   3  334.77   27.80 
 -12  -7  -3  320.47   18.60 
 -12  -7  -3  319.77   20.30 
 -12   7  -3  320.17   23.10 
 -12   7  -3  315.97   25.50 
  13  -7   3  304.37   27.60 
 -13  -7  -3  307.07   20.60 
 -13  -7  -3  328.77   16.00 
 -13   7  -3  325.27   26.80 
 -13   7  -3  259.17   21.40 
 -14  -7  -3   23.90    5.70 
 -14  -7  -3   21.90    7.40 
 -14   7  -3   17.50    7.70 
 -14   7  -3   16.50    6.30 
 -15  -8   3    0.60    4.20 
  15  -8  -3   -1.90    6.10 
  15  -8  -3   -5.60    5.10 
 -15   8   3   -3.20    4.50 
 -15   8   3   16.20    6.30 
 -14  -8   3   94.09   10.80 
  14  -8  -3   86.09   16.60 
 -14  -8   3   72.59    8.30 
  14  -8  -3  119.59   20.80 
 -14   8   3  117.19   19.60 
 -14   8   3   87.29   16.70 
 -13  -8   3  220.38   15.80 
 -13  -8   3  249.38   16.60 
 -13  -8   3  216.38   20.50 
  13  -8  -3  234.18   22.50 
  13  -8  -3  209.68   22.30 
  13   8  -3  233.78   17.00 
 -13   8   3  188.88   20.30 
  12  -8  -3    3.10    4.60 
 -12  -8   3   -1.70    2.60 
 -12  -8   3   -7.50    3.40 
 -12  -8   3   13.00    3.80 
 -12  -8   3   -1.10    2.40 
  12   8  -3    0.00    3.90 
 -12   8   3    1.80    4.60 
 -11  -8   3  292.07   15.10 
  11  -8  -3  259.17   23.00 
  11  -8  -3  277.47   23.70 
 -11  -8   3  280.07   13.00 
 -11   8   3  288.57   23.00 
  11   8  -3  267.57   17.30 
 -10  -8   3  230.28   11.10 
  10  -8  -3  287.97   23.50 
 -10  -8   3  271.27   14.60 
  10  -8  -3  272.07   23.00 
 -10  -8   3  279.17   13.80 
 -10   8   3  291.17   22.20 
  10   8  -3  297.67   16.90 
  -9  -8   3    3.20    1.50 
   9  -8  -3    4.90    4.30 
   9  -8  -3   -0.90    2.50 
  -9  -8   3    0.50    2.40 
  -9  -8   3    6.60    2.40 
   9   8  -3    4.40    2.60 
  -9   8   3    2.20    4.00 
   8  -8  -3   96.79   13.00 
  -8  -8   3  106.99    7.10 
  -8  -8   3   97.29    7.70 
  -8  -8   3   88.69    5.50 
   8  -8  -3  112.49   13.50 
  -8   8   3   95.29   12.00 
   8   8  -3   79.89    8.00 
  -7  -8   3  364.16   12.00 
  -7  -8   3  357.26   10.30 
   7  -8  -3  366.86   23.10 
   7  -8  -3  365.36   23.30 
  -7  -8   3  363.56   13.90 
   7   8  -3  346.07   15.80 
   6  -8  -3   18.50    5.40 
   6  -8  -3   18.20    5.60 
  -6  -8   3   18.90    3.50 
  -6   8   3    9.90    3.80 
   6   8  -3   23.80    4.50 
  -6   8   3   13.80    5.40 
   5  -8  -3  604.54   27.40 
  -5  -8   3  623.24   16.30 
   5  -8  -3  625.44   30.70 
   5   8  -3  610.34   18.90 
  -5   8   3  601.54   27.50 
  -5   8   3  569.44   24.80 
   4  -8  -3   74.29    8.80 
   4  -8  -3   76.79    8.90 
   4   8  -3   78.39    5.90 
  -4   8   3   77.29    8.30 
  -4   8   3   73.99    8.80 
  -3  -8   3  443.96   18.70 
   3  -8  -3  468.35   21.20 
   3  -8  -3  469.65   21.30 
  -3  -8   3  470.95   12.20 
   3   8  -3  464.05   14.40 
   3   8  -3  445.26   10.70 
  -3   8   3  446.76   19.70 
  -3   8   3  439.16   20.40 
   2  -8  -3   -0.60    1.70 
   2  -8  -3    4.70    2.40 
  -2  -8   3    2.60    1.50 
  -2  -8   3    3.10    1.70 
  -2   8   3    3.00    2.00 
   2   8  -3    2.80    1.40 
  -2   8   3   -0.90    2.20 
   2   8  -3    5.20    1.60 
   1  -8  -3  134.89    9.40 
  -1  -8   3  130.19    8.00 
  -1  -8   3  133.19    7.40 
   1  -8  -3  139.79   10.10 
   1   8  -3  131.69    7.00 
   1   8  -3  118.99    8.70 
  -1   8   3  129.09    9.00 
  -1   8   3  133.59    9.30 
   0  -8  -3  350.06   15.40 
   0  -8   3  329.07   13.20 
   0  -8   3  310.17   14.20 
   0  -8  -3  321.87   13.30 
   0   8   3  330.37   13.90 
   0   8  -3  294.97   13.10 
   0   8  -3  308.47   12.00 
   0   8   3  299.37   13.80 
   1  -8   3   66.29    7.10 
  -1  -8  -3   74.09    5.30 
   1  -8   3   76.29    6.80 
  -1  -8  -3   81.69    7.20 
   1   8   3   73.39    6.40 
  -1   8  -3   79.79    6.30 
  -1   8  -3   63.39    6.60 
   1   8   3   77.79    4.90 
   2  -8   3  280.37   14.20 
  -2  -8  -3  262.97    8.40 
   2  -8   3  252.87   15.00 
  -2  -8  -3  256.57   12.60 
  -2   8  -3  254.77   14.40 
   2   8   3  255.97    7.20 
  -2   8  -3  249.08   12.50 
   2   8   3  243.78   12.00 
   3  -8   3  940.31   32.90 
   3  -8   3  912.61   29.80 
  -3  -8  -3  934.11   26.40 
  -3   8  -3  897.91   31.20 
   3   8   3  953.80   26.40 
  -3   8  -3  923.81   31.90 
  -3   8  -3  890.51   27.50 
   4  -8   3    7.40    3.80 
  -4  -8  -3    2.90    2.00 
   4  -8   3    7.40    3.70 
  -4   8  -3    3.90    3.10 
  -4   8  -3   -1.20    1.60 
   4   8   3    1.60    2.00 
  -4   8  -3    2.00    1.70 
   5  -8   3  203.48   15.00 
   5  -8   3  230.78   17.40 
  -5  -8  -3  239.48   12.70 
  -5   8  -3  252.57   17.40 
  -5   8  -3  225.38   14.40 
   5   8   3  244.78   13.20 
  -5   8  -3  241.68   16.70 
   6  -8   3   17.10    5.90 
  -6  -8  -3   18.40    4.40 
  -6   8  -3   22.70    5.90 
   6   8   3   15.40    4.20 
  -7  -8  -3    0.80    1.40 
   7  -8   3   -0.60    2.40 
  -7  -8  -3    2.30    2.30 
  -7   8  -3   -0.30    1.70 
   7   8   3   -0.70    1.70 
  -8  -8  -3   32.60    6.30 
  -8  -8  -3   26.30    7.50 
  -8  -8  -3   25.60    3.30 
   8  -8   3   29.30    8.70 
  -8   8  -3   15.40    6.00 
  -8   8  -3   29.70    7.60 
   8   8   3   39.70    7.60 
  -9  -8  -3   37.00    7.50 
   9  -8   3   36.40   10.10 
  -9  -8  -3   35.20    8.50 
  -9  -8  -3   37.00    4.30 
  -9  -8  -3   44.70    5.70 
   9   8   3   39.90    8.00 
  -9   8  -3   70.19   11.80 
  -9   8  -3   37.70    9.60 
  10  -8   3   26.30   14.10 
 -10  -8  -3   28.10    5.10 
 -10  -8  -3   18.90    3.40 
 -10  -8  -3   17.10    5.30 
 -10   8  -3   30.30    9.00 
 -11  -8  -3    8.20    2.50 
  11  -8   3   18.10    7.40 
 -11  -8  -3    6.80    3.70 
 -11  -8  -3    1.50    3.70 
 -11   8  -3   10.90    4.80 
 -11   8  -3   11.80    7.50 
 -12  -8  -3   12.70    3.60 
 -12  -8  -3   13.20    5.10 
  12  -8   3   14.30    7.50 
 -12  -8  -3   14.20    4.60 
 -12   8  -3   14.30    6.60 
 -12   8  -3    9.20    7.60 
  13  -8   3   -6.50    6.20 
 -13  -8  -3   -1.90    2.60 
 -13  -8  -3   -3.70    4.30 
 -13   8  -3    9.40    5.70 
 -14  -8  -3    4.10    2.30 
  14  -8   3    2.10    6.50 
 -14   8  -3   -0.40    5.00 
 -14   8  -3    3.70    6.20 
 -15  -9   3    8.10    5.20 
 -15   9   3    0.50    7.60 
 -15   9   3   12.70    9.20 
  14  -9  -3   -1.30    7.70 
  14  -9  -3   13.80    7.40 
 -14  -9   3    1.00    3.50 
 -14   9   3    6.40    6.00 
 -13  -9   3   -0.70    2.70 
  13  -9  -3   -5.50    5.10 
 -13  -9   3    2.00    2.50 
  13   9  -3   -3.10    4.10 
 -13   9   3   -7.90    3.30 
  12  -9  -3   55.09   14.10 
  12  -9  -3   45.10   11.70 
 -12  -9   3   38.10    7.00 
 -12  -9   3   50.19    6.90 
 -12  -9   3   21.10    5.50 
 -12  -9   3   31.50    5.10 
 -12   9   3   22.80    8.70 
  12   9  -3   25.30    9.50 
 -11  -9   3   37.10    5.80 
  11  -9  -3   17.40    7.90 
 -11  -9   3   30.10    5.90 
 -11  -9   3   25.40    4.50 
  11  -9  -3   16.50    8.10 
 -11  -9   3   27.80    5.20 
 -11   9   3   15.70    6.70 
  11   9  -3   13.30    5.00 
  10  -9  -3   29.40   10.70 
  10  -9  -3   25.00    8.40 
 -10  -9   3   33.10    5.00 
 -10  -9   3   26.90    4.10 
 -10  -9   3   32.60    5.30 
 -10   9   3   22.10    9.50 
  10   9  -3   32.60    6.50 
   9  -9  -3   49.99   11.60 
   9  -9  -3   33.90    9.10 
  -9  -9   3   30.10    3.70 
  -9  -9   3   42.40    4.90 
  -9  -9   3   42.50    6.70 
   9   9  -3   44.40    6.90 
  -9   9   3   34.30    8.50 
   8  -9  -3  169.18   17.10 
  -8  -9   3  164.68    8.50 
  -8  -9   3  183.88    7.60 
  -8  -9   3  192.08    9.90 
   8  -9  -3  161.58   16.50 
   8   9  -3  188.48   11.50 
  -8   9   3  153.78   15.40 
   7  -9  -3    6.30    3.90 
   7  -9  -3    7.90    5.10 
   7   9  -3    1.10    2.00 
  -7   9   3    4.20    3.00 
  -6  -9   3  252.37    9.80 
   6  -9  -3  245.78   18.20 
   6  -9  -3  246.38   18.50 
  -6   9   3  235.18   22.10 
  -6   9   3  233.88   20.50 
   6   9  -3  243.78   11.90 
  -5  -9   3  181.38    8.00 
   5  -9  -3  184.08   15.20 
   5  -9  -3  187.68   15.30 
  -5   9   3  185.58   15.10 
   5   9  -3  180.98    9.60 
  -5   9   3  198.28   14.20 
   4  -9  -3  101.49   10.60 
  -4  -9   3   88.59    6.50 
   4  -9  -3   68.19   14.50 
   4   9  -3   85.49    4.00 
  -4   9   3   78.29    9.10 
   4   9  -3   89.79    6.40 
  -4   9   3   75.69    8.30 
  -3  -9   3  769.02   18.50 
   3  -9  -3  747.73   28.20 
  -3  -9   3  746.03   18.30 
   3  -9  -3  734.43   28.40 
   3   9  -3  756.82   16.70 
  -3   9   3  742.83   27.00 
  -3   9   3  736.43   27.90 
   3   9  -3  737.73   19.30 
  -2  -9   3   56.79    4.60 
   2  -9  -3   54.89    7.00 
  -2  -9   3   49.90    4.70 
   2  -9  -3   52.39    6.40 
   2   9  -3   47.00    4.10 
  -2   9   3   54.49    6.50 
   2   9  -3   47.30    4.20 
  -2   9   3   44.70    7.30 
  -1  -9   3  176.28    9.10 
   1  -9  -3  165.18   10.70 
   1  -9  -3  163.88   11.60 
  -1  -9   3  173.38    9.90 
  -1   9   3  163.38   10.80 
   1   9  -3  176.68    9.20 
  -1   9   3  175.38   10.80 
   1   9  -3  171.08    8.40 
   0  -9  -3 1132.49   29.00 
   0  -9  -3 1126.39   32.30 
   0  -9   3 1124.39   28.70 
   0  -9   3 1121.09   31.30 
   0   9  -3 1149.69   27.30 
   0   9   3 1152.58   28.70 
   0   9  -3 1117.49   29.70 
   0   9   3 1127.29   31.00 
   1  -9   3  361.16   15.90 
  -1  -9  -3  380.26   16.50 
  -1  -9  -3  397.36   13.40 
   1  -9   3  366.16   17.50 
   1   9   3  355.36   15.40 
  -1   9  -3  340.07   16.20 
  -1   9  -3  371.66   14.80 
   1   9   3  370.96   12.50 
  -2  -9  -3   83.09    4.60 
   2  -9   3   68.09    7.30 
  -2  -9  -3   80.69    7.30 
   2  -9   3   74.09    8.50 
   2   9   3   71.69    6.60 
  -2   9  -3   65.99    7.50 
  -2   9  -3   75.69    7.00 
   2   9   3   77.29    4.00 
  -2   9  -3   85.29    8.90 
   3  -9   3  583.84   23.90 
  -3  -9  -3  603.64   21.20 
   3  -9   3  649.54   27.50 
  -3   9  -3  653.23   26.40 
   3   9   3  620.84   21.00 
  -3   9  -3  616.24   22.50 
  -3   9  -3  610.94   26.00 
  -4  -9  -3   43.60    5.50 
   4  -9   3   36.30    6.90 
   4  -9   3   37.60    8.10 
  -4   9  -3   34.20    6.40 
   4   9   3   30.10    5.20 
  -4   9  -3   39.30    7.80 
  -4   9  -3   41.00    8.10 
  -5  -9  -3  368.56   16.30 
   5  -9   3  340.37   20.20 
   5  -9   3  350.36   22.20 
  -5   9  -3  354.26   21.30 
  -5   9  -3  312.77   17.70 
  -5   9  -3  353.36   21.70 
   5   9   3  345.37   16.10 
   6  -9   3  427.16   25.90 
  -6  -9  -3  410.96   18.10 
  -6   9  -3  382.26   20.50 
   6   9   3  382.86   18.00 
  -7  -9  -3  838.72   27.80 
   7  -9   3  813.12   38.10 
  -7   9  -3  842.72   32.80 
   7   9   3  744.13   33.00 
  -8  -9  -3   64.29    7.40 
   8  -9   3   71.89   14.10 
  -8  -9  -3   59.59    9.60 
  -8   9  -3   61.59   10.60 
   8   9   3   55.09    7.80 
  -9  -9  -3  326.07   20.60 
  -9  -9  -3  310.87   17.30 
   9  -9   3  296.67   24.70 
  -9  -9  -3  274.27    9.60 
   9   9   3  324.77   18.90 
  -9   9  -3  324.77   24.20 
  -9   9  -3  328.67   21.50 
  10  -9   3  163.18   18.80 
 -10  -9  -3  195.38   10.50 
 -10  -9  -3  174.28   13.30 
 -10  -9  -3  185.58    8.40 
 -10   9  -3  217.48   20.30 
 -10   9  -3  220.78   18.20 
  11  -9   3   65.49   15.60 
 -11  -9  -3   17.90    4.30 
 -11  -9  -3   24.20    3.80 
 -11  -9  -3   20.70    5.20 
 -11   9  -3   21.60    8.90 
 -11   9  -3   22.50    7.30 
 -12  -9  -3  364.16   16.60 
 -12  -9  -3  358.06   13.80 
 -12  -9  -3  336.47   20.50 
  12  -9   3  293.97   27.70 
 -12   9  -3  327.67   27.00 
 -12   9  -3  332.97   24.70 
 -13  -9  -3  238.38   11.60 
  13  -9   3  225.48   24.30 
 -13  -9  -3  238.38   17.80 
 -13   9  -3  284.37   24.70 
 -13   9  -3  239.08   20.80 
  14  -9   3   -3.90    6.20 
 -14  -9  -3   -4.50    4.20 
 -14   9  -3   -5.30    5.10 
 -14   9  -3   -4.20    6.30 
  14 -10  -3   36.10   11.40 
  14 -10  -3   36.20   13.50 
 -14 -10   3   56.99    7.50 
 -14  10   3   26.10   12.10 
 -13 -10   3  308.27   13.70 
  13 -10  -3  320.97   29.80 
 -13 -10   3  316.17   16.90 
  13 -10  -3  332.47   29.50 
 -13  10   3  317.07   26.40 
  12 -10  -3   23.10    8.90 
 -12 -10   3   41.90    5.80 
 -12 -10   3   19.50    5.20 
 -12 -10   3   31.10    4.30 
 -12 -10   3   20.00    4.90 
  12 -10  -3   21.30    8.40 
 -12  10   3   24.20    9.10 
  12  10  -3   22.80    5.80 
  11 -10  -3  304.17   26.30 
 -11 -10   3  317.17   14.40 
 -11 -10   3  329.47   14.90 
  11 -10  -3  325.77   27.00 
 -11 -10   3  323.37   12.80 
 -11 -10   3  327.27   16.20 
  11  10  -3  313.77   16.80 
 -11  10   3  305.37   24.50 
 -10 -10   3  126.79    7.30 
  10 -10  -3  149.69   17.10 
 -10 -10   3  133.79    8.80 
  10 -10  -3  134.19   18.20 
 -10 -10   3  134.59    8.50 
  10  10  -3  152.08   10.90 
 -10  10   3  150.08   16.50 
  -9 -10   3   -4.40    2.10 
   9 -10  -3    0.40    3.80 
  -9 -10   3    4.50    2.30 
  -9 -10   3   -2.70    1.20 
   9 -10  -3    1.00    4.00 
   9  10  -3   -1.90    2.00 
  -9  10   3    3.40    3.40 
   8 -10  -3  266.37   21.20 
  -8 -10   3  244.48   10.60 
   8 -10  -3  274.97   22.20 
  -8  10   3  280.67   21.00 
   8  10  -3  232.68   12.60 
  -7 -10   3  350.46   11.80 
   7 -10  -3  361.36   24.10 
   7 -10  -3  315.57   22.80 
   7  10  -3  336.27   14.40 
  -7  10   3  309.97   21.10 
   6 -10  -3   46.80    9.90 
   6 -10  -3   16.80    6.10 
  -6 -10   3   30.00    3.30 
  -6  10   3   30.40    7.80 
   6  10  -3   40.30    4.60 
   5 -10  -3  513.15   26.40 
  -5 -10   3  529.15   17.80 
   5 -10  -3  525.15   26.90 
  -5  10   3  531.95   25.30 
   5  10  -3  519.65   16.80 
  -5  10   3  494.85   25.80 
  -5  10   3  576.94   26.50 
   4 -10  -3  724.53   30.60 
  -4 -10   3  731.33   17.60 
  -4 -10   3  710.73   17.90 
  -4  10   3  689.13   31.60 
   4  10  -3  694.23   15.80 
  -4  10   3  712.93   28.50 
   4  10  -3  717.13   19.60 
  -3 -10   3  119.29    7.00 
   3 -10  -3  124.59   11.10 
  -3 -10   3  116.99    6.70 
  -3  10   3  121.59   11.00 
  -3  10   3  113.19   10.00 
   3  10  -3  122.29    7.00 
   3  10  -3  111.19    6.00 
   2 -10  -3  439.26   20.20 
  -2 -10   3  448.56   16.10 
  -2 -10   3  460.45   15.00 
   2 -10  -3  452.05   21.60 
  -2  10   3  446.76   20.00 
  -2  10   3  441.86   20.10 
   2  10  -3  442.46   14.20 
   2  10  -3  452.35   14.60 
   1 -10  -3  652.83   25.10 
  -1 -10   3  662.83   20.10 
   1 -10  -3  651.83   23.30 
  -1 -10   3  650.13   21.70 
   1  10  -3  664.83   20.40 
   1  10  -3  650.73   18.50 
  -1  10   3  659.73   23.20 
  -1  10   3  629.24   23.50 
   0 -10   3  159.68   11.00 
   0 -10  -3  183.18   12.20 
   0 -10   3  165.18   10.00 
   0 -10  -3  175.58   10.30 
   0  10  -3  179.58   10.70 
   0  10   3  173.58   11.20 
   0  10   3  166.48    9.80 
   0  10  -3  175.38    9.40 
   1 -10   3  577.04   21.40 
   1 -10   3  560.94   23.20 
  -1 -10  -3  580.04   17.50 
  -1 -10  -3  552.14   21.40 
   1  10   3  569.94   17.00 
   1  10   3  573.44   20.80 
  -1  10  -3  585.04   19.60 
   1  10   3  567.94   16.50 
  -1  10  -3  546.95   21.60 
   2 -10   3  377.16   18.00 
  -2 -10  -3  361.06   16.50 
   2 -10   3  346.37   18.90 
  -2  10  -3  326.37   17.80 
  -2  10  -3  329.37   17.50 
   2  10   3  352.76   10.10 
  -2  10  -3  355.66   15.90 
   2  10   3  354.46   10.00 
   2  10   3  324.77   15.20 
   3 -10   3 1074.39   37.60 
  -3 -10  -3 1063.19   30.20 
   3  10   3 1029.80   29.20 
  -3  10  -3 1006.10   31.00 
  -3  10  -3  973.60   35.60 
  -4 -10  -3  440.96   18.40 
   4 -10   3  435.66   24.20 
   4 -10   3  432.86   22.10 
  -4  10  -3  435.46   23.00 
  -4  10  -3  454.45   23.90 
   4  10   3  438.56   18.10 
  -4  10  -3  481.25   21.20 
  -5 -10  -3 1079.59   31.20 
   5 -10   3 1061.59   41.30 
  -5  10  -3 1041.40   34.80 
   5  10   3 1048.90   31.10 
  -6 -10  -3   18.70    4.40 
   6 -10   3   24.50    7.70 
  -6  10  -3   11.50    4.60 
   6  10   3   14.00    4.30 
   7 -10   3  381.76   26.10 
   7  10   3  406.96   21.20 
  -7  10  -3  369.36   21.60 
   8 -10   3 1322.37   53.19 
  -8 -10  -3 1339.27   38.30 
   8  10   3 1283.97   39.60 
  -8  10  -3 1313.07   44.90 
  -9 -10  -3   48.90    8.30 
   9 -10   3   36.80   10.80 
  -9 -10  -3   28.30    6.40 
  -9  10  -3   22.70    7.80 
  -9  10  -3   36.90    9.10 
   9  10   3   28.40    6.10 
 -10 -10  -3   11.10    4.40 
  10 -10   3   13.30    6.00 
 -10  10  -3    1.70    3.70 
 -10  10  -3    9.40    4.80 
  11 -10   3  415.66   32.90 
 -11 -10  -3  383.46   21.00 
 -11  10  -3  432.76   30.50 
 -11  10  -3  432.06   27.30 
  12 -10   3  138.29   18.60 
 -12 -10  -3  112.39   11.80 
 -12 -10  -3  100.49    6.50 
 -12  10  -3  106.79   14.40 
 -12  10  -3   87.29   16.50 
 -13 -10  -3   26.90    7.40 
  13 -10   3   24.70    9.70 
 -13 -10  -3   34.30    5.20 
 -13  10  -3   42.60   10.70 
 -14 -10  -3  142.89   14.90 
  14 -10   3  160.08   21.10 
 -14  10  -3  142.89   16.90 
 -14  10  -3  169.88   19.40 
  14 -11  -3   82.49   17.90 
  14 -11  -3   48.70   15.40 
 -14  11   3   51.99   12.60 
 -13 -11   3   23.60    5.00 
  13 -11  -3   31.40   10.70 
  13 -11  -3   13.40    6.90 
 -13 -11   3   13.80    2.90 
 -13  11   3   12.80    7.00 
 -12 -11   3  169.78   11.00 
  12 -11  -3  182.98   20.60 
  12 -11  -3  158.68   19.40 
 -12 -11   3  183.28   10.40 
 -12 -11   3  160.58   10.60 
 -12 -11   3  184.48    9.20 
 -12  11   3  182.18   19.40 
  11 -11  -3   -7.80    3.90 
  11 -11  -3   -8.90    3.70 
 -11 -11   3    6.20    2.90 
 -11 -11   3   -0.20    2.10 
 -11 -11   3    4.40    2.50 
  11  11  -3   -2.90    2.90 
 -11  11   3   -1.30    3.00 
  10 -11  -3  110.99   15.30 
 -10 -11   3  107.79    7.40 
  10 -11  -3   94.89   17.40 
 -10 -11   3  109.19    8.30 
 -10  11   3  107.09   13.90 
  10  11  -3  100.59    8.50 
   9 -11  -3  140.99   17.00 
  -9 -11   3   94.69    6.20 
   9 -11  -3   85.19   15.60 
   9  11  -3   92.19    7.90 
  -9  11   3   92.19   12.90 
   8 -11  -3   60.19   12.60 
  -8 -11   3   68.49    5.00 
   8 -11  -3   48.50   10.80 
  -8  11   3   59.29   11.30 
   8  11  -3   49.50    5.80 
  -7 -11   3   28.10    3.40 
   7 -11  -3   38.40    9.10 
   7 -11  -3   35.00    9.10 
   7  11  -3   40.90    4.60 
  -7  11   3   32.30    8.10 
   6 -11  -3   13.10    5.50 
   6 -11  -3   22.00    7.10 
  -6  11   3   22.60    6.20 
   6  11  -3   23.60    4.00 
  -5 -11   3   13.00    3.70 
   5 -11  -3    8.00    4.30 
   5 -11  -3    6.70    4.80 
   5  11  -3    4.00    2.20 
   5  11  -3    9.50    2.00 
  -5  11   3    7.00    3.50 
  -5  11   3   11.00    4.40 
  -4 -11   3   19.80    3.10 
   4 -11  -3   21.80    6.30 
   4 -11  -3   23.00    6.50 
  -4 -11   3   13.50    3.00 
   4  11  -3   20.20    3.60 
  -4  11   3    7.80    3.90 
  -4  11   3   16.60    5.00 
   4  11  -3   17.50    2.80 
  -4  11   3   15.20    5.00 
   3 -11  -3    7.80    3.90 
  -3 -11   3   10.40    2.80 
  -3 -11   3    5.30    2.20 
   3 -11  -3   14.30    5.10 
   3  11  -3    6.60    2.80 
  -3  11   3   14.60    4.70 
  -3  11   3    4.50    3.70 
   3  11  -3    8.20    2.50 
  -3  11   3    1.80    1.90 
   2 -11  -3  224.88   17.90 
   2 -11  -3  245.68   15.10 
  -2 -11   3  232.08   10.70 
  -2 -11   3  234.48   12.00 
  -2  11   3  237.28   14.60 
  -2  11   3  224.38   14.50 
  -2  11   3  223.78   13.70 
   2  11  -3  223.18   10.40 
   2  11  -3  232.28   10.20 
   1 -11  -3  294.17   17.00 
  -1 -11   3  266.27   12.60 
   1 -11  -3  309.17   15.80 
  -1 -11   3  307.97   15.00 
   1  11  -3  292.57   13.40 
  -1  11   3  288.77   15.80 
   1  11  -3  286.17   11.80 
  -1  11   3  279.97   14.20 
  -1  11   3  289.77   15.20 
   0 -11  -3  312.07   14.60 
   0 -11   3  313.77   16.40 
   0 -11   3  330.77   15.30 
   0 -11  -3  329.57   17.50 
   0  11   3  306.87   14.30 
   0  11   3  290.77   15.40 
   0  11  -3  312.87   13.30 
   0  11  -3  331.67   15.50 
   0  11   3  318.07   13.70 
   1 -11   3   64.89    7.20 
  -1 -11  -3   58.59    7.30 
   1 -11   3   54.09    8.80 
  -1 -11  -3   60.09    5.50 
  -1  11  -3   50.49    6.70 
  -1  11  -3   57.69    7.50 
  -1  11  -3   51.49    5.80 
   1  11   3   58.59    5.00 
   1  11   3   54.39    6.50 
   1  11   3   52.19    6.20 
   2 -11   3   25.10    6.20 
  -2 -11  -3   24.00    5.00 
   2 -11   3   29.90    6.50 
  -2  11  -3   26.90    6.10 
  -2  11  -3   28.00    6.30 
  -2  11  -3   24.70    5.30 
   2  11   3   26.00    5.10 
   2  11   3   22.60    2.70 
   3 -11   3   38.20    7.50 
  -3 -11  -3   40.40    6.70 
   3 -11   3   41.90    8.90 
  -3  11  -3   41.90    7.70 
  -3  11  -3   44.80    6.40 
  -3  11  -3   35.00    7.70 
   3  11   3   53.49    6.10 
  -4 -11  -3  200.48   12.50 
   4 -11   3  171.68   15.50 
   4 -11   3  182.18   14.60 
  -4  11  -3  170.88   14.70 
   4  11   3  182.88   11.60 
  -4  11  -3  178.98   14.70 
  -4  11  -3  181.68   13.00 
   5 -11   3  145.29   15.20 
  -5 -11  -3  152.68   11.20 
  -5  11  -3  171.78   13.40 
   5  11   3  140.39   10.60 
   6 -11   3  216.48   19.60 
  -6 -11  -3  193.18   12.60 
  -6  11  -3  224.58   16.30 
   6  11   3  209.98   14.30 
   7 -11   3   19.50    7.10 
  -7 -11  -3   14.90    4.30 
   7  11   3   18.70    5.30 
  -7  11  -3   14.90    5.60 
   8 -11   3   73.49   14.60 
  -8 -11  -3  131.89   11.10 
  -8  11  -3  120.79   12.90 
   8  11   3  128.39   11.10 
  -9 -11  -3    0.60    4.90 
  -9 -11  -3   14.50    4.50 
   9 -11   3   14.70    7.10 
  -9  11  -3    7.10    4.90 
   9  11   3    9.60    5.50 
 -10 -11  -3    1.20    3.30 
  10 -11   3   -7.00    3.60 
 -10  11  -3    7.20    4.00 
 -10  11  -3    4.50    4.40 
 -11 -11  -3    6.80    3.60 
  11 -11   3   -0.60    5.30 
 -11  11  -3   -5.40    4.00 
 -11  11  -3   -1.50    4.70
[truncated: 1,114,398 more chars]
