# Supplementary material for: Controllable catalytic difluorocarbene transfer enables access to diversified fluoroalkylated arenes
Source: Springer Nature journal article supplement (doi:10.1038/s41557-019-0331-9), 2019-09-23
Supplement: 41557_2019_331_MOESM134_ESM.mol [file 41557_2019_331_MOESM134_ESM.mol]

nchem.19030518B-compB1-2.mol
  ChemDraw07301920142D

 54 57  0  0  1  0  0  0  0  0999 V2000
   -2.2641    1.4589    0.0000 C   0  0  0  0  0  0  0  0  0  0  0  0
   -2.2641    0.6339    0.0000 C   0  0  0  0  0  0  0  0  0  0  0  0
   -1.5497    0.2214    0.0000 O   0  0  0  0  0  0  0  0  0  0  0  0
   -0.8352    0.6339    0.0000 C   0  0  0  0  0  0  0  0  0  0  0  0
   -0.8352    1.4589    0.0000 C   0  0  0  0  0  0  0  0  0  0  0  0
   -1.5497    1.8714    0.0000 C   0  0  0  0  0  0  0  0  0  0  0  0
   -0.1207    0.2214    0.0000 C   0  0  0  0  0  0  0  0  0  0  0  0
    0.5937    0.6339    0.0000 C   0  0  0  0  0  0  0  0  0  0  0  0
    0.5937    1.4589    0.0000 C   0  0  0  0  0  0  0  0  0  0  0  0
   -0.1207    1.8714    0.0000 C   0  0  0  0  0  0  0  0  0  0  0  0
   -2.9786    1.8714    0.0000 C   0  0  0  0  0  0  0  0  0  0  0  0
   -3.6931    1.4589    0.0000 C   0  0  0  0  0  0  0  0  0  0  0  0
   -3.6931    0.6339    0.0000 C   0  0  0  0  0  0  0  0  0  0  0  0
   -2.9786    0.2214    0.0000 C   0  0  0  0  0  0  0  0  0  0  0  0
   -1.1372    2.5858    0.0000 C   0  0  0  0  0  0  0  0  0  0  0  0
   -1.9622    2.5858    0.0000 C   0  0  0  0  0  0  0  0  0  0  0  0
   -2.9786   -0.6036    0.0000 P   0  0  0  0  0  0  0  0  0  0  0  0
   -0.1207   -0.6036    0.0000 P   0  0  0  0  0  0  0  0  0  0  0  0
   -1.5535   -1.0900    0.0000 Pd  0  3  0  0  0  0  0  0  0  0  0  0
   -3.7981   -0.6986    0.0000 C   0  0  0  0  0  0  0  0  0  0  0  0
   -3.7033   -1.5175    0.0000 C   0  0  0  0  0  0  0  0  0  0  0  0
   -4.6170   -0.7935    0.0000 C   0  0  0  0  0  0  0  0  0  0  0  0
   -3.8930    0.1203    0.0000 C   0  0  0  0  0  0  0  0  0  0  0  0
   -3.3061   -1.3608    0.0000 C   0  0  0  0  0  0  0  0  0  0  0  0
   -2.5495   -1.6881    0.0000 C   0  0  0  0  0  0  0  0  0  0  0  0
   -3.6334   -2.1175    0.0000 C   0  0  0  0  0  0  0  0  0  0  0  0
   -4.0628   -1.0336    0.0000 C   0  0  0  0  0  0  0  0  0  0  0  0
    0.2365   -1.3473    0.0000 C   0  0  0  0  0  0  0  0  0  0  0  0
    0.9796   -0.9903    0.0000 C   0  0  0  0  0  0  0  0  0  0  0  0
    0.5935   -2.0903    0.0000 C   0  0  0  0  0  0  0  0  0  0  0  0
   -0.5065   -1.7043    0.0000 C   0  0  0  0  0  0  0  0  0  0  0  0
    0.7019   -0.6660    0.0000 C   0  0  0  0  0  0  0  0  0  0  0  0
    0.7643    0.1560    0.0000 C   0  0  0  0  0  0  0  0  0  0  0  0
    1.5239   -0.7284    0.0000 C   0  0  0  0  0  0  0  0  0  0  0  0
    0.6395   -1.4880    0.0000 C   0  0  0  0  0  0  0  0  0  0  0  0
   -1.5542   -1.9150    0.0000 C   0  0  0  0  0  0  0  0  0  0  0  0
   -2.3786   -1.9143    0.0000 F   0  0  0  0  0  0  0  0  0  0  0  0
   -1.5549   -2.7394    0.0000 F   0  0  0  0  0  0  0  0  0  0  0  0
   -0.7299   -1.9157    0.0000 F   0  0  0  0  0  0  0  0  0  0  0  0
   -4.4076    1.8714    0.0000 C   0  0  0  0  0  0  0  0  0  0  0  0
   -4.8197    1.1574    0.0000 C   0  0  0  0  0  0  0  0  0  0  0  0
   -5.1215    2.2835    0.0000 C   0  0  0  0  0  0  0  0  0  0  0  0
   -3.9954    2.5853    0.0000 C   0  0  0  0  0  0  0  0  0  0  0  0
    1.3082    1.8714    0.0000 C   0  0  0  0  0  0  0  0  0  0  0  0
    0.8960    2.5853    0.0000 C   0  0  0  0  0  0  0  0  0  0  0  0
    2.0221    2.2835    0.0000 C   0  0  0  0  0  0  0  0  0  0  0  0
    1.7204    1.1574    0.0000 C   0  0  0  0  0  0  0  0  0  0  0  0
    3.6925    1.5019    0.0000 C   0  0  0  0  0  0  0  0  0  0  0  0
    2.9781    1.9144    0.0000 F   0  0  0  0  0  0  0  0  0  0  0  0
    2.9781    1.0894    0.0000 F   0  0  0  0  0  0  0  0  0  0  0  0
    3.6925    0.6769    0.0000 F   0  0  0  0  0  0  0  0  0  0  0  0
    4.4070    1.9144    0.0000 C   0  0  0  0  0  0  0  0  0  0  0  0
    4.4070    2.7394    0.0000 O   0  0  0  0  0  0  0  0  0  0  0  0
    5.1215    1.5019    0.0000 O   0  5  0  0  0  0  0  0  0  0  0  0
 20 21  1  0      
 20 22  1  0      
 20 23  1  0      
 17 20  1  0      
 24 25  1  0      
 24 26  1  0      
 24 27  1  0      
 17 24  1  0      
 28 29  1  0      
 28 30  1  0      
 28 31  1  0      
 18 28  1  0      
 32 33  1  0      
 32 34  1  0      
 32 35  1  0      
 18 32  1  0      
 36 37  1  0      
 36 38  1  0      
 36 39  1  0      
 19 36  1  0      
 40 41  1  0      
 40 42  1  0      
 40 43  1  0      
 12 40  1  0      
 44 45  1  0      
 44 46  1  0      
 44 47  1  0      
  9 44  1  0      
  1  2  2  0      
  2  3  1  0      
  3  4  1  0      
  4  5  2  0      
  5  6  1  0      
  6  1  1  0      
  4  7  1  0      
  7  8  2  0      
  8  9  1  0      
  9 10  2  0      
 10  5  1  0      
  1 11  1  0      
 11 12  2  0      
 12 13  1  0      
 13 14  2  0      
 14  2  1  0      
  6 15  1  0      
 16  6  1  0      
 14 17  1  0      
  7 18  1  0      
 17 19  1  0      
 19 18  1  0      
  3 19  1  6      
 52 53  2  0      
 52 54  1  0      
 48 49  1  0      
 48 50  1  0      
 48 51  1  0      
 48 52  1  0      
M  CHG  2  19   1  54  -1
M  STY  1   1 SUP
M  SLB  1   1   1
M  SAL   1  4  20  21  22  23
M  SBL   1  1   4
M  SMT   1 t-Bu
M  SBV   1   4    0.8195    0.0950
M  STY  1   2 SUP
M  SLB  1   2   2
M  SAL   2  4  24  25  26  27
M  SBL   2  1   8
M  SMT   2 t-Bu
M  SBV   2   8    0.3275    0.7572
M  STY  1   3 SUP
M  SLB  1   3   3
M  SAL   3  4  28  29  30  31
M  SBL   3  1  12
M  SMT   3 t-Bu
M  SBV   3  12   -0.3573    0.7436
M  STY  1   4 SUP
M  SLB  1   4   4
M  SAL   4  4  32  33  34  35
M  SBL   4  1  16
M  SMT   4 t-Bu
M  SBV   4  16   -0.8226    0.0624
M  STY  1   5 SUP
M  SLB  1   5   5
M  SAL   5  4  36  37  38  39
M  SBL   5  1  20
M  SMT   5 CF3
M  SBV   5  20    0.0007    0.8250
M  STY  1   6 SUP
M  SLB  1   6   6
M  SAL   6  4  40  41  42  43
M  SBL   6  1  24
M  SMT   6 t-Bu
M  SBV   6  24    0.7145   -0.4125
M  STY  1   7 SUP
M  SLB  1   7   7
M  SAL   7  4  44  45  46  47
M  SBL   7  1  28
M  SMT   7 t-Bu
M  SBV   7  28   -0.7145   -0.4125
M  END
